# Supplementary material for: Acquisition of auditory discrimination mediated by different processes through two distinct circuits linked to the lateral striatum
Source: eLife. 2025 Jul 11;13:RP97326. doi: 10.7554/eLife.97326 (PMC12252547; doi:10.7554/eLife.97326)
Supplement: Figure 1—figure supplement 1—source data 1. [file elife-97326-fig1-figsupp1-data1.xlsx]

## Sheet: Figure 1–figure supplement 1
Figure 1–figure supplement 1	Data	Changes in the proportion of the WSW or LSL strategy through the discrimination learning in intact rats
	Subjects	n = 14
	Softwear
	Dependent variable	Proportion of the WSW (%)																											Dependent variable	Proportion of the LSL (%)
	Stats																												Stats
			Day																												Day
			1	2	3	4	5	6	7	8	9	10	11	12	13	14	15	16	17	18	19	20	21	22	23	24					1	2	3	4	5	6	7	8	9	10	11	12	13	14	15	16	17	18	19
	animal ID	#1	14.6067	8.93855	12.2905	8.93855	30.1676	41.8994	56.4246	59.7765	60.8939	67.5978	71.5084	76.5363	73.743	70.9497	77.6536	71.5084	69.8324	69.2737	72.067	76.5363	75.419	69.8324	68.7151	75.9777			animal ID	#1	15.1685	17.3184	12.8492	5.58659	9.49721	2.7933	2.23464	1.11732	0	0.558659	0	0	0	0	0	0	0	0	0
		#2	25.8427	31.6384	24.0223	35.7542	43.0168	60.8939	64.8045	74.8603	67.5978	66.4804	70.9497	57.5419	63.1285	70.9497	68.1564	70.9497	69.2737	64.2458	67.5978	68.1564	68.1564	70.3911	68.7151	77.6536				#2	12.3596	7.9096	3.91061	4.46927	3.35196	6.70391	0.558659	0.558659	0.558659	0	0	0.558659	0	0	0	0	1.11732	0	0
		#3	8.52273	5.64972	0	1.69492	29.0503	42.4581	63.1285	57.6271	71.5084	70.3911	67.5978	70.9497	75.419	70.3911	77.6536	70.3911	72.6257	69.8324	70.9497	73.743	72.067	69.8324	71.5084	70.3911				#3	11.9318	5.08475	0	2.25989	3.35196	1.11732	0	0.564972	0	0	0	0	0.558659	0	0	0	0	1.67598	0
		#4	0.561798	2.7933	8.93855	46.9274	56.4246	65.3631	62.0112	63.6872	55.8659	65.3631	54.1899	66.6667	62.0112	73.1844	72.6257	72.067	72.6257	68.7151	71.5084	76.5363	67.5978	70.9497	74.8603	72.6257				#4	7.30337	3.35196	0	2.7933	1.67598	1.11732	0.558659	0	0.558659	2.7933	1.11732	0.564972	0.558659	0	0	0	0	0	0
		#5	19.6629	36.3128	40.7821	28.8136	23.4286	34.6369	58.6592	60.8939	67.0391	65.3631	74.8603	69.2737	72.6257	74.8603	67.5978	70.3911	70.3911	76.5363	75.419	77.6536	79.3296	70.9497	67.5978	72.6257				#5	8.98876	7.26257	6.14525	6.77966	6.28571	6.70391	0	1.11732	0.558659	0	0.558659	0	0	0	0	0	0	0	0
		#6	5.61798	18.4358	43.5028	64.2458	50.838	70.9497	60.3352	64.2458	64.2458	67.0391	67.5978	73.1844	67.0391	74.8603	71.5084	78.2123	73.1844	70.9497	65.3631	76.5363	75.419	67.5978	74.8603	78.7709				#6	11.236	8.93855	6.77966	0.558659	1.67598	0	1.67598	1.11732	2.23464	0	0.558659	0.558659	0	0	0	0	0	0	0.558659
		#7	21.9101	24.581	11.1732	18.4358	7.82123	30.1676	42.4581	51.3966	51.3966	50.838	57.5419	54.7486	58.6592	64.8045	64.8045	64.8045	63.6872	62.0112	64.2458	58.6592	72.6257	68.1564	67.5978	67.0391				#7	19.1011	12.2905	20.6704	18.4358	16.2011	16.2011	6.70391	1.67598	2.23464	2.23464	1.67598	1.11732	1.11732	1.67598	0	0.558659	0	1.11732	0
		#8	9.55056	11.1732	12.8492	16.5714	24.0223	13.4078	26.257	19.5531	32.4022	49.7175	54.3353	68.7151	66.4804	70.0565	72.8814	72.8814	66.1017	69.4915	76.2712	74.0113	79.096	74.0113	68.3616	72.8814				#8	21.3483	13.9665	21.7877	26.8571	17.3184	16.2011	13.9665	8.93855	2.7933	3.38983	1.15607	0.558659	0	0.564972	0.564972	0	0	0.564972	0
		#9	2.24719	1.67598	3.91061	31.0734	32.9609	46.9274	64.2458	62.0112	61.4525	68.7151	68.1564	68.1564	73.1844	65.9218	69.8324	69.2737	72.6257	68.1564	67.5978	71.5084	70.9497	73.1844	65.9218	75.419				#9	1.1236	2.7933	0.558659	6.77966	7.26257	2.7933	0.558659	1.11732	0	0	1.11732	0	0	0	0	0	0	0	0
		#10	10.1124	17.3184	7.82123	14.5251	10.0559	36.8715	58.1006	58.1006	67.0391	64.8045	58.6592	64.2458	65.9218	64.8045	67.5978	70.9497	65.9218	68.1564	66.4804	72.067	64.8045	69.8324	77.095	66.4804				#10	7.86517	16.2011	10.6145	8.93855	7.82123	4.46927	1.67598	2.7933	0.558659	0.558659	0.558659	0.558659	2.23464	0	1.11732	0	0	0	1.11732
		#11	12.9213	3.91061	6.21469	25.6983	34.6369	40.2235	38.5475	35.7542	54.1899	56.4246	67.0391	70.9497	68.7151	70.9497	77.095	69.2737	70.9497	68.1564	75.419	72.067	68.7151	68.7151	63.1285	66.4804				#11	14.0449	3.35196	2.25989	7.26257	5.02793	4.46927	6.70391	4.46927	0.558659	1.67598	0.558659	0	1.11732	0	0	0	0	0.558659	0
		#12	9.55056	13.9665	38.5475	48.0447	48.0447	45.8101	56.4246	62.0112	60.3352	72.067	69.8324	72.067	72.067	67.0391	69.2737	68.1564	70.9497	68.1564	73.743	73.743	73.743	70.3911	70.3911	78.2123				#12	12.9213	6.14525	3.91061	0.558659	4.46927	3.35196	0.558659	1.11732	1.11732	0.558659	0.558659	0.558659	0	0	0	0	0	0	0
		#13	25.8621	36.8715	34.4633	43.5754	48.6034	52.514	60.8939	63.6872	62.5698	68.7151	68.7151	70.3911	81.0056	73.1844	70.3911	68.7151	74.3017	70.9497	74.3017	70.3911	72.6257	69.8324	74.8603	73.743				#13	10.9195	6.14525	7.34463	2.7933	3.91061	3.91061	0.558659	0	0.558659	0	1.11732	0	0	0	0	0	0	0	0
		#14	6.17978	6.70391	6.14525	15.6425	48.0447	53.6313	58.6592	64.8045	68.1564	63.1285	59.2179	75.9777	67.0391	69.2737	71.5084	73.1844	68.7151	67.0391	71.5084	68.7151	71.5084	70.3911	69.2737	74.8603				#14	9.55056	3.35196	3.91061	5.02793	2.7933	3.35196	1.67598	2.7933	0	0	1.11732	0	0.558659	0	0.558659	0	0.558659	0.558659	0
[truncated: 5 more columns]
