# Supplementary material for: Acquisition of auditory discrimination mediated by different processes through two distinct circuits linked to the lateral striatum
Source: eLife. 2025 Jul 11;13:RP97326. doi: 10.7554/eLife.97326 (PMC12252547; doi:10.7554/eLife.97326)
Supplement: Figure 1—source data 1. [file elife-97326-fig1-data1.xlsx]

## Sheet: Fig. 1B
Fig. 1B	Data	Learning curve of the auditory discrimination in intact rats
	Subjects	n = 14
	Softwear
	Dependent variable	Success rate (%)
	Stats
			Day
			1	2	3	4	5	6	7	8	9	10	11	12	13	14	15	16	17	18	19	20	21	22	23	24
	animal ID	#1	49.162	45	47.7778	52.2222	65	76.1111	84.4444	89.4444	94.4444	95	96.1111	98.8889	98.8889	96.6667	98.8889	98.3333	97.7778	98.8889	98.8889	98.8889	97.2222	98.8889	98.3333	98.8889
		#2	56.4246	66.4804	62.2222	70.5556	77.7778	85	94.4444	95.5556	95.5556	93.8889	96.1111	89.4444	93.8889	97.2222	94.382	97.7778	95.5556	95	95.5307	97.2222	96.1111	98.3333	97.7778	97.2222
		#3	48.3146	50.838	50.2793	49.7207	67.2222	76.6667	91.1111	88.8268	95.5556	96.1111	97.7778	96.6667	96.6667	96.6667	97.2067	98.8889	98.8889	96.0894	98.8889	98.3333	97.7778	99.4444	96.6667	97.7778
		#4	45.8101	49.4444	55.5556	78.3333	86.6667	91.1111	92.7778	94.4444	88.8889	89.4444	88.3333	92.7374	90.5556	97.7778	97.7778	97.2222	98.8889	95	99.4444	100	97.7654	98.8889	97.2222	98.8889
		#5	56.4246	67.7778	70.5556	62.5698	64.0449	69.4444	90.5556	88.3333	91.1111	94.4444	95	95.5556	98.3333	97.7778	96.6667	98.8889	96.6667	99.4444	98.8889	98.8889	99.4444	98.8889	96.6667	98.8889
		#6	46.9274	57.2222	75.9777	92.2222	83.8889	96.6667	87.2222	93.3333	93.8889	94.4444	96.1111	96.1111	96.6667	97.2222	96.6667	99.4444	97.7778	97.7778	95	97.7778	97.7778	96.6667	100	100
		#7	50.2793	60.5556	45.5556	49.4444	45.5556	58.3333	74.4444	81.1111	83.3333	82.7778	85	84.4444	90.5556	88.8889	93.3333	92.7778	93.8889	90.5556	91.6667	88.3333	94.4444	95.5556	94.4444	93.2584
		#8	44.1341	48.8889	45	43.8202	56.1111	48.3333	56.6667	57.2222	69.4444	79.8883	84.1808	92.7778	93.3333	96.648	95.5556	97.7778	93.8889	95.5556	96.6667	97.2222	98.8889	99.4444	96.6667	98.3333
		#9	50.2793	49.4444	51.6667	65.9218	67.7778	78.8889	90.5556	89.4444	92.7778	95.5556	95	95	97.2222	93.8889	96.6667	94.4444	98.8889	96.1111	97.2222	97.7778	97.2222	97.2222	95	97.7778
		#10	50.838	52.2222	47.2222	54.4444	52.2222	71.1111	86.6667	87.7778	95.5556	93.3333	87.2222	91.6667	92.2222	91.6667	94.4444	95.5556	93.8889	95.5556	91.1111	95.5556	94.4444	98.3333	100	97.7778
		#11	47.486	49.4444	53.6313	62.2222	68.8889	73.8889	71.1111	72.2222	85.5556	85.5556	92.2222	97.2222	96.1111	97.2222	98.3333	97.7778	97.2222	95.5556	98.8889	98.8889	96.6667	97.2222	96.1111	93.8889
		#12	49.162	56.1111	72.2222	85.5556	80	76.1111	88.3333	94.4444	90	96.1111	95.5556	96.6667	97.7778	95.5556	98.3333	97.7778	97.7778	95	97.7778	99.4444	98.3333	97.7778	98.3333	100
		#13	57.6271	71.6667	67.0391	77.2222	78.3333	78.3333	89.4444	91.6667	92.2222	95.5556	95.5556	97.2222	100	97.7778	97.7778	96.1111	98.8889	96.1111	98.8889	98.8827	100	96.6667	99.4444	99.4444
		#14	48.0447	51.1111	52.2222	56.1111	79.4444	82.2222	86.6667	89.4444	96.1111	92.2222	88.8889	97.7778	96.1111	96.1111	96.6667	97.191	95.5556	95.5556	98.3333	97.7778	98.8889	98.3333	99.4444	98.3333

## Sheet: Fig. 1B (inset)
Fig. 1B	Data	Learning curve of the auditory discrimination in intact rats
	Subjects	n = 14
	Softwear
	Dependent variable	Number of rats
	Stats
			Day achieved the success rate of more than 90%
	animal ID	#1	9
		#2	7
		#3	7
		#4	6
		#5	7
		#6	4
		#7	13
		#8	12
		#9	7
		#10	9
		#11	11
		#12	8
		#13	8
		#14	9

## Sheet: Fig. 1C
Fig. 1C	Data	Success rate in intact rats at day 2, 6, 10, 13, and 24
	Subjects	n = 14
	Softwear	SPSS ver. 27
	Dependent variable	Success rate (%)
	Stats	one-way ANOVA, day as repeated measure; day effect, F(1.896824,24.658713) = 106.706157, p = 0.0000000000011059 adjusted by Greenhouse-Geisser ε 0.474206 day 2 vs. day 6, p = 0.001354 day 2 vs. day 10, p = 0.0000000088293 day 2 vs. day 13, p = 0.0000000010673 day 2 vs. day 24, p = 0.00000000067402 day 6 vs. day 10, p = 0.000362 day 6 vs. day 13, p = 0.000336 day 6 vs. day 24, p = 0.000075 day 10 v…
			Day
			2	6	10	13	24
	animal ID	#1	45	76.1111	95	98.8889	98.8889
		#2	66.4804	85	93.8889	93.8889	97.2222
		#3	50.838	76.6667	96.1111	96.6667	97.7778
		#4	49.4444	91.1111	89.4444	90.5556	98.8889
		#5	67.7778	69.4444	94.4444	98.3333	98.8889
		#6	57.2222	96.6667	94.4444	96.6667	100
		#7	60.5556	58.3333	82.7778	90.5556	93.2584
		#8	48.8889	48.3333	79.8883	93.3333	98.3333
		#9	49.4444	78.8889	95.5556	97.2222	97.7778
		#10	52.2222	71.1111	93.3333	92.2222	97.7778
		#11	49.4444	73.8889	85.5556	96.1111	93.8889
		#12	56.1111	76.1111	96.1111	97.7778	100
		#13	71.6667	78.3333	95.5556	100	99.4444
		#14	51.1111	82.2222	92.2222	96.1111	98.3333

## Sheet: Fig. 1D
Fig. 1D	Data	Response time in intact rats
	Subjects	n = 14
	Softwear	SPSS ver. 27
	Dependent variable	Time (s)
	Stats	one-way ANOVA, day as repeated measure; day effect, F(2.203249,28.642241) = 2.386389, p = 0.105450 adjusted by Greenhouse-Geisser ε 0.550812
			Day
			2	6	10	13	24
	animal ID	#1	0.356162	0.620698	0.868889	1.29	0.63
		#2	0.63	0.849056	0.635111	0.649333	0.699444
		#3	1.07244	0.757111	0.493222	0.433278	0.603722
		#4	0.729278	0.9115	0.596056	0.817944	0.850556
		#5	0.788222	0.775	0.518056	0.561722	0.548333
		#6	0.726056	0.470944	0.4585	0.564833	0.631278
		#7	0.4475	0.375667	0.300167	0.401944	0.346889
		#8	1.2635	1.02156	1.11772	0.948278	1.1705
		#9	0.828778	1.01739	0.721167	0.552889	0.508167
		#10	0.984333	0.899333	0.5975	0.724667	0.480333
		#11	0.281833	0.386278	0.267222	0.233944	0.324667
		#12	0.693889	0.343444	0.318278	0.311667	0.364222
		#13	0.573167	0.990778	0.5235	0.378833	0.572222
		#14	0.486611	0.476333	0.416556	0.577667	0.458444

## Sheet: Fig. 1E
Fig. 1E	Data	Omission rate in intact rats
	Subjects	n = 14
	Softwear	SPSS ver. 27
	Dependent variable	Omission rate (%)
	Stats	one-way ANOVA, day as repeated measure; day effect, F(4,52) = 0.698925, p = 0.596194
			Day
			2	6	10	13	24
	animal ID	#1	0	0	0	0	0
		#2	1.11111	0	0	0	0
		#3	1.11111	0	0	0	0
		#4	0	0	0	0	0
		#5	0	0	0	0	0
		#6	0	0	0	0	0
		#7	0	0	0	0	2.22222
		#8	0	0	1.11111	0	0
		#9	0	0	0	0	0
		#10	0	0	0	0	0
		#11	0	0	0	0	0
		#12	0	0	0	0	0
		#13	0	0	0	0	0
		#14	0	0	0	0	0

## Sheet: Fig. 1F
Fig. 1F	Data	Response bias in intact rats
	Subjects	n = 14
	Softwear	SPSS ver. 27
	Dependent variable	Response bias
	Stats	one-way ANOVA, day as repeated measure; day effect, F(1.129,14.674) = 0.250408, p = 0.652876 adjusted by Greenhouse-Geisser ε 0.282199
			Day
			2	6	10	13	24
	animal ID	#1	0.75	0.55	0.527778	0.5	0.511111
		#2	0.614525	0.538889	0.561111	0.538889	0.516667
		#3	0.938547	0.666667	0.538889	0.522222	0.522222
		#4	0.961111	0.533333	0.494444	0.472222	0.5
		#5	0.444444	0.594444	0.511111	0.505556	0.5
		#6	0.661111	0.477778	0.555556	0.5	0.5
		#7	0.405556	0.427778	0.505556	0.538889	0.522472
		#8	0.233333	0.661111	0.463687	0.444444	0.505556
		#9	0.0277778	0.622222	0.522222	0.527778	0.488889
		#10	0.688889	0.633333	0.533333	0.511111	0.511111
		#11	0.05	0.605556	0.566667	0.516667	0.516667
		#12	0.794444	0.461111	0.494444	0.522222	0.5
		#13	0.616667	0.472222	0.488889	0.5	0.505556
		#14	0.0777778	0.533333	0.555556	0.472222	0.516667
