# Supplementary material for: Acquisition of auditory discrimination mediated by different processes through two distinct circuits linked to the lateral striatum
Source: eLife. 2025 Jul 11;13:RP97326. doi: 10.7554/eLife.97326 (PMC12252547; doi:10.7554/eLife.97326)
Supplement: Figure 2—source data 1. [file elife-97326-fig2-data1.xlsx]

## Sheet: Fig. 2C
Fig. 2C	Data	Learning curves of the single lever press task
	Subjects	n = 14
	Softwear	SPSS ver. 27
	Dependent variable	Number of lever press
	Stats
			Day
			1	2	3	4
	animal ID	#1	79	76	83	68
		#2	70	85	90	86
		#3	69	74	88	79
		#4	42	77	83	87
		#5	70	83	88	79
		#6	83	89	90	84
		#7	49	86	89	82
		#8	59	86	89	90
		#9	60	80	88	83
		#10	43	73	85	77
		#11	81	83	88	83
		#12	65	84	81	81
		#13	76	86	90	89
		#14	71	80	88	85

## Sheet: Fig. 2D
Fig. 2D	Data	Learning curves of the auditory discrimination task
	Subjects	n = 14
	Softwear
	Dependent variable	Success rate (%)
	Stats
			Day
			1	2	3	4	5	6	7	8	9	10	11	12	13	14	15	16	17	18	19	20	21	22	23	24
	animal ID	#1	52.8736	44.4444	56.9832	62.5	65.4971	67.4419	70.5556	76.2712	82.1839	81.1765	87.6404	93.1034	93.6047	95.5056	90.8571	92.6136	92.8994	90.2299	91.875	87.574	91.8605	93.6047	91.195	89.0244
		#2	55.0562	57.7778	66.6667	65.1685	84.9162	75.6098	93.3333	91.6667	89.2045	89.7727	94.4444	95.5056	93.8889	97.7143	95	97.7778	97.0588	95.977	97.1751	98.2955	97.1264	97.093	93.6709	94.6667
		#3	59.5506	51.6854	61.0169	66.092	64.0449	65.5556	77.095	78.2857	88.764	76.1364	91.573	94.2857	93.3333	94.4134	93.2961	96.648	97.1751	96.0674	93.1818	97.191	96.0894	97.7143	98.2353	100
		#4	56.4103	45.122	51.6667	64.2458	65.5556	70	72.8814	75.1412	83.7079	70.1149	88.1356	90.5325	88	88.5542	96.5517	96.6667	92.3977	93.4911	85.8896	93.8547	94.152	89.697	79.1139	72.9412
		#5	67.4157	57.7778	67.0391	65.5556	67.9775	67.0455	72.6257	65.9218	72.2222	71.1111	78.6517	82.2222	82.5843	83.1461	85.1429	88.2682	88.8889	94.4134	91.573	92.1788	88.6364	90.4762	92.0455	89.8876
		#6	42.6966	60	55.5556	60	72.6257	70.4545	88.764	95.5556	86.0335	80	92.2222	92.6554	93.2584	93.7143	93.2961	92.6554	94.8276	93.2203	89.7436	86.9822	88.9571	91.3295	88.7006	93.1818
		#7	55.0562	51.6854	58.1006	71.5084	78.8571	65.0602	83.1461	78.8889	86.4407	81.1111	89.8305	90.4494	91.3295	96	93.6416	92	94.2529	96.0227	96.6667	94.9438	94.9153	96.5517	95.3757	88.6364
		#8	49.4382	54.4444	58.1921	62.2857	73.4463	73.5632	88.8268	84.3575	85.9551	84.4444	88.7006	86.3636	96.6667	93.2203	94.9438	94.8864	94.1176	95.5307	93.2961	95.4545	92	96.4497	94.3503	83.1461
		#9	42.0455	48.3146	72.8324	84.9711	88.6792	83.7838	90.3448	96.648	91.4286	88.6076	94.8718	91.0714	92.2156	94.2308	92.8994	93.865	93.1677	89.7436	96.1783	95.9064	94.4785	95.6204	94.1935	89.4737
		#10	44.9438	51.1111	53.2164	64.5161	76.5432	70.2381	82.2785	75	73.4568	75.2941	82.3171	94.6429	88.6228	93.2515	93.0233	93.6306	95.679	92.7711	95.0311	93.0636	92.6667	96.4706	95.9302	93.1034
		#11	50.5618	50	67.0391	60	73.743	75.8621	78.9773	73.5632	73.9394	72.7273	77.3585	78.9474	75	80.7692	85.8974	92.4528	88.75	91.358	91.9255	88.4848	93.4911	91.9075	92.3077	95.122
		#12	45.122	42.6667	53.5294	64.3357	72.2222	64.7727	71.7514	71.4286	78.0899	84.7059	95	90.9091	94.4444	97.1751	95.3757	96.5714	95.4023	96.6292	97.7011	95.9302	95.1807	92.1348	97.1098	97.7778
		#13	53.9326	57.7778	68.3333	67.2222	79.4444	78.8889	87.0787	91.6667	84.2424	86.2069	91.1111	93.3333	95	94.4444	93.8889	92.6554	96.648	93.8889	94.8571	93.8547	97.2222	95.5556	98.2759	92.1348
		#14	48.3146	56.6667	58.9888	80.3797	83.5227	83.1461	87.6404	90.0585	87.5706	90.9091	84.6154	92.3977	94.7977	90.3955	96.6102	95.9064	92.9825	90.6433	93.75	96.5714	96.5517	92.0455	98.8439	93.8272

## Sheet: Fig. 2E
Fig. 2E	Data	Success rate on the scan days during the auditory discrimination								Data	Response time on the scan days during the auditory discrimination								Data	Omission rate on the scan days during the auditory discrimination								Data	Response bias on the scan days during the auditory discrimination
	Subjects	n = 14								Subjects	n = 14								Subjects	n = 14								Subjects	n = 14
	Softwear	SPSS ver. 27								Softwear	SPSS ver. 27								Softwear	SPSS ver. 27								Softwear	SPSS ver. 27
	Dependent variable	Success rate (%)								Dependent variable	Time (s)								Dependent variable	Omission rate (%)								Dependent variable	Response bias
	Stats	one-way ANOVA, day as repeated measure; day effect, F(3,39) = 125.011967, p = 0.000000000000000000047733 day 2 vs. day 6, p = 0.00000050363 day 2 vs. day 10, p = 0.000000028744 day 2 vs. day 24, p = 0.00000000048944 day 6 vs. day 10, p = 0.001110 day 6 vs. day 24, p = 0.000027 day 10 vs. day 24, p = 0.003014 adjusted by the Bonferroni correction								Stats	one-way ANOVA, day as repeated measure; day effect, F(3,39) = 0.155512, p = 0.925508								Stats	one-way ANOVA, day as repeated measure; day effect, F(3,39) = 1.559155, p = 0.214706								Stats	one-way ANOVA, day as repeated measure; day effect, F(1.779,23.130) = 17.734258, p = 0.000036 adjusted by Greenhouse-Geisser ε 0.593073
			Day									Day									Day									Day
			2	6	10	24						2	6	10	24						2	6	10	24						2	6	10	24
	animal ID	#1	44.4444	67.4419	81.1765	89.0244				animal ID	#1	0.949667	1.14178	0.766556	1.42211				animal ID	#1	0	4.44444	5.55556	8.88889				animal ID	#1	0.477778	0.581395	0.435294	0.536585
		#2	57.7778	75.6098	89.7727	94.6667					#2	0.870333	0.878111	0.839778	1.95444					#2	0	8.88889	2.22222	16.6667					#2	0.188889	0.47561	0.522727	0.546667
		#3	51.6854	65.5556	76.1364	100					#3	0.770222	0.965556	0.827111	0.536556					#3	1.11111	0	2.22222	2.22222					#3	0.426966	0.488889	0.590909	0.5
		#4	45.122	70	70.1149	72.9412					#4	1.81956	0.825111	1.255	1.62022					#4	8.88889	0	3.33333	5.55556					#4	0.219512	0.377778	0.528736	0.517647
		#5	57.7778	67.0455	71.1111	89.8876					#5	1.06222	0.956778	0.667222	0.733					#5	0	2.22222	0	1.11111					#5	0.277778	0.386364	0.611111	0.52809
		#6	60	70.4545	80	93.1818					#6	0.855	1.375	0.779444	0.446444					#6	0	2.22222	0	2.22222					#6	0.544444	0.397727	0.5	0.5
		#7	51.6854	65.0602	81.1111	88.6364					#7	1.32056	1.18744	0.508778	1.19122					#7	1.11111	7.77778	0	2.22222					#7	0.235955	0.650602	0.511111	0.534091
		#8	54.4444	73.5632	84.4444	83.1461					#8	0.806667	1.58567	0.826556	0.852					#8	0	3.33333	0	1.11111					#8	0.266667	0.689655	0.5	0.573034
		#9	48.3146	83.7838	88.6076	89.4737					#9	1.14856	1.24044	1.79867	1.12956					#9	1.11111	17.7778	12.2222	15.5556					#9	0.11236	0.378378	0.455696	0.5
		#10	51.1111	70.2381	75.2941	93.1034					#10	0.618778	1.45267	0.960222	1.275					#10	0	6.66667	5.55556	3.33333					#10	0.0333333	0.440476	0.576471	0.505747
		#11	50	75.8621	72.7273	95.122					#11	0.994111	0.79	1.072	1.16233					#11	0	3.33333	14.4444	8.88889					#11	0.511111	0.45977	0.493506	0.487805
		#12	42.6667	64.7727	84.7059	97.7778					#12	1.83467	1.17289	1.34844	0.664111					#12	16.6667	2.22222	5.55556	0					#12	0.24	0.465909	0.494118	0.5
		#13	57.7778	78.8889	86.2069	92.1348					#13	0.768111	0.717889	1.14956	0.792667					#13	0	0	3.33333	1.11111					#13	0.211111	0.511111	0.563218	0.52809
		#14	56.6667	83.1461	90.9091	93.8272					#14	1.16122	0.821222	1.18967	1.18411					#14	0	1.11111	2.22222	10					#14	0.355556	0.393258	0.477273	0.518519

## Sheet: Fig. 2J
Fig. 2J	Data	Regional 18F-FDG uptakes in the aDLS (left hemisphere)									Data	Regional 18F-FDG uptakes in the aDLS (right hemisphere)
	Subjects	n = 14									Subjects	n = 14
	Softwear	SPSS ver. 27									Softwear	SPSS ver. 27
	Dependent variable	Normalized regional 18F-FDG uptakes (a.u.)									Dependent variable	Normalized regional 18F-FDG uptakes (a.u.)
	Stats	one-way ANOVA, time as repeated measure; time effect, F(4,52) = 10.321886, p = 0.000003 single lever v.s. day 2, p = 0.124310 single lever v.s. day 6, p = 0.016363 single lever v.s. day 10, p = 1.000000 single lever v.s. day 24, p = 1.000000 day 2 v.s. day 6, p = 0.000065 day 2 v.s. day 10, p = 0.019146 day 2 v.s. day 24, p = 0.016972 day 6 v.s. day 10, p = 0.505561 day 6 v.s. day 24, p = 0.04091…									Stats	one-way ANOVA, time as repeated measure; time effect, F(4,52) = 7.462220, p = 0.000079 single lever v.s. day 2, p = 0.342139 single lever v.s. day 6, p = 0.411423 single lever v.s. day 10, p = 1.000000 single lever v.s. day 24, p = 1.000000 day 2 v.s. day 6, p = 0.000286 day 2 v.s. day 10, p = 0.035705 day 2 v.s. day 24, p = 0.139690 day 6 v.s. day 10, p = 0.104912 day 6 v.s. day 24, p = 0.005000…
			Timing										Timing
			Day 4 of the single lever press task	Day 2 of the discrimination task	Day 6 of the discrimination task	Day 10 of the discrimination task	Day 24 of the discrimination task						Day 4 of the single lever press task	Day 2 of the discrimination task	Day 6 of the discrimination task	Day 10 of the discrimination task	Day 24 of the discrimination task
	animal ID	#1	366.828	351.111	374.747	348.429	355.79				animal ID	#1	371.971	345.514	356.66	348.743	347.448
		#2	349.371	347.713	373.517	362.506	362.541					#2	350.436	341.538	366.117	356.028	364.049
		#3	323.386	323.701	329.051	338.231	332.166					#3	336.445	323.65	334.536	336.334	321.574
		#4	348.948	343.114	349.239	335.82	348.535					#4	336.106	331.612	350.098	343.895	348.526
		#5	356.914	337.836	363.889	339.384	351.875					#5	341.95	334.388	353.371	340.554	350.165
		#6	327.686	331.418	340.192	353.738	343.016					#6	316.996	335.282	333.725	329.736	332.355
		#7	346.046	327.727	356.604	356.085	356.409					#7	335.173	334.238	354.577	346.9	345.125
		#8	347.891	344.408	358.007	354.823	363.361					#8	357.178	331.464	353.898	346.295	344.167
		#9	332.537	338.583	360.461	349.574	340.837					#9	340.678	343.393	353.508	346.205	338.972
		#10	350.708	347.079	351.287	346.833	341.297					#10	338.147	330.015	345.724	338.714	343.001
		#11	348.703	330.163	345.608	350.383	331.802					#11	345.087	342.237	343.456	334.824	338.717
		#12	357.643	337.208	360.26	349.381	343.063					#12	347.617	337.868	348.423	342.107	340.744
		#13	344.176	341.526	370.267	364.537	361.731					#13	340.339	333.647	339.267	354.709	341.882
		#14	351.109	350.1	362.878	355.448	353.011					#14	343.063	338.85	351.866	343.826	340.012

## Sheet: Fig. 2K
Fig. 2K	Data	Regional 18F-FDG uptakes in the pVLS (left hemisphere)										Data	Regional 18F-FDG uptakes in the pVLS (right hemisphere)
	Subjects	n = 14										Subjects	n = 14
	Softwear	SPSS ver. 27										Softwear	SPSS ver. 27
	Dependent variable	Normalized regional 18F-FDG uptakes (a.u.)										Dependent variable	Normalized regional 18F-FDG uptakes (a.u.)
	Stats	one-way ANOVA, time as repeated measure; time effect, F(2.368036,30.784468) = 4.152485, p = 0.020113 adjusted by Greenhouse-Geisser ε 0.592009 single lever vs. day 2, p = 1.000000 single lever vs. day 6, p = 0.072979 single lever vs. day 10, p = 0.000018 single lever vs. day 24, p = 0.840584 day 2 vs. day 6, p = 1.000000 day 2 vs. day 10, p = 0.170301 day 2 vs. day 24, p = 1.000000 day 6 vs. day …									Stats	one-way ANOVA, time as repeated measure; time effect, F(4,52) = 5.995143, p = 0.000481 single lever vs. day 2, p = 1.000000 single lever vs. day 6, p = 1.000000 single lever vs. day 10, p = 0.000777 single lever vs. day 24, p = 0.495422 day 2 vs. day 6, p = 1.000000 day 2 vs. day 10, p = 0.010556 day 2 vs. day 24, p = 0.157687 day 6 vs. day 10, p = 0.032402 day 6 vs. day 24, p = 1.000000 day 10 v…
			Timing										Timing
			Day 4 of the single lever press task	Day 2 of the discrimination task	Day 6 of the discrimination task	Day 10 of the discrimination task	Day 24 of the discrimination task						Day 4 of the single lever press task	Day 2 of the discrimination task	Day 6 of the discrimination task	Day 10 of the discrimination task	Day 24 of the discrimination task
	animal ID	#1	304.165	317.026	305.734	313.2	296.173				animal ID	#1	324.399	286.271	315.075	316.816	305.857
		#2	297.048	312.51	323.122	315.462	316.267					#2	299.036	310.296	324.711	318.284	316.926
		#3	294.663	304.857	286.229	308.269	303.349					#3	293.285	296.186	290.737	301.257	295.495
		#4	297.785	296.668	312.639	308.072	306.172					#4	299.128	292.733	300.674	315.611	307.655
		#5	293.846	289.837	325.009	296.218	303.135					#5	296.447	300.438	287.956	302.743	317.041
		#6	286.577	283.976	288.389	299.538	291.621					#6	286.458	302.263	286.633	302.503	289.818
		#7	299.018	304.526	312.309	317.462	289.65					#7	304.9	301.657	316.137	335.306	284.191
		#8	295.608	298.817	297.886	310.666	305.273					#8	298.781	300.108	314.153	325.696	315.981
		#9	296.692	287.473	324.05	313.557	296.093					#9	296.687	294.986	306.626	323.278	317.003
		#10	300.224	333.897	300.118	312.439	303.076					#10	289.916	311.952	300.442	306.245	315.28
		#11	299.302	297.04	295.353	301.96	309.626					#11	300.916	297.088	287.376	308.337	316.387
		#12	306.446	302.357	315.782	314.803	299.711					#12	312.435	294.992	307.999	326.406	302.353
		#13	301.835	299.013	312.584	321.49	326.004					#13	295.046	301.167	307.681	312.449	325.275
		#14	303.426	297.969	325.477	311.998	300.017					#14	297.18	303.599	320.935	307.832	315.016

## Sheet: Fig. 2L
Fig. 2L	Data	Regional 18F-FDG uptakes in the DMS (left hemisphere)										Data	Regional 18F-FDG uptakes in the DMS (right hemisphere)
	Subjects	n = 14										Subjects	n = 14
	Softwear	SPSS ver. 27										Softwear	SPSS ver. 27
	Dependent variable	Normalized regional 18F-FDG uptakes (a.u.)										Dependent variable	Normalized regional 18F-FDG uptakes (a.u.)
	Stats	one-way ANOVA, time as repeated measure; time effect, F(4,52) = 12.836017, p = 0.00000024447 single lever vs. day 2, p = 1.000000 single lever vs. day 6, p = 1.000000 single lever vs. day 10, p = 1.000000 single lever vs. day 24, p = 0.058746 day 2 vs. day 6, p = 1.000000 day 2 vs. day 10, p = 1.000000 day 2 vs. day 24, p = 0.000018 day 6 vs. day 10, p = 1.000000 day 6 vs. day 24, p = 0.000477 da…									Stats	one-way ANOVA, time as repeated measure; time effect, F(4,52) = 10.717411, p = 0.000002 single lever vs. day 2, p = 1.000000 single lever vs. day 6, p = 1.000000 single lever vs. day 10, p = 1.000000 single lever vs. day 24, p = 0.035791 day 2 vs. day 6, p = 1.000000 day 2 vs. day 10, p = 1.000000 day 2 vs. day 24, p = 0.010838 day 6 vs. day 10, p = 1.000000 day 6 vs. day 24, p = 0.000264 day 10 …
			Timing											Timing
			Day 4 of the single lever press task	Day 2 of the discrimination task	Day 6 of the discrimination task	Day 10 of the discrimination task	Day 24 of the discrimination task							Day 4 of the single lever press task	Day 2 of the discrimination task	Day 6 of the discrimination task	Day 10 of the discrimination task	Day 24 of the discrimination task
	animal ID	#1	358.229	338.286	340.358	343.623	325.84					animal ID	#1	339.624	330.899	336.425	334.66	327.612
		#2	342.058	358.867	356.917	344.843	340.604						#2	350.123	344.2	346.109	339.396	328.725
		#3	332.105	337.528	335.918	337.73	310.539						#3	320.579	330.971	328.641	321.285	306.582
		#4	348.644	350.21	352.911	346.647	321.131						#4	337.958	335.231	345.854	318.435	327.337
		#5	326.933	349.665	349.075	350.479	343.631						#5	335.907	343.42	339.062	343.171	332.786
		#6	328.902	331.736	342.834	337.726	325.09						#6	320.602	324.864	332.685	323.838	318.14
		#7	329.304	339.633	334.2	342.256	329.992						#7	343.171	331.531	330.649	337.474	309.633
		#8	333.78	329.235	327.601	338.071	315.857						#8	329.962	328.964	331.958	342.256	322.13
		#9	340.296	348.458	341.209	341.187	330.696						#9	337.867	332.328	336.518	329.507	318.706
		#10	353.118	364.573	371.993	340.848	331.619						#10	334.527	333.142	352.761	335.714	326.83
		#11	329.344	354.072	343.72	340.226	333.335						#11	319.962	331.932	323.065	331.183	326.501
		#12	346.789	352.419	345.017	339.118	330.063						#12	349.354	354.989	334.392	335.89	300.11
		#13	353.57	340.01	335.344	339.32	324.68						#13	321.779	334.685	335.982	329.957	314.698
		#14	341.244	343.022	362.45	344.894	326.971						#14	323.221	327.648	326.274	323.141	317.689
