# Supplementary material for: Acquisition of auditory discrimination mediated by different processes through two distinct circuits linked to the lateral striatum
Source: eLife. 2025 Jul 11;13:RP97326. doi: 10.7554/eLife.97326 (PMC12252547; doi:10.7554/eLife.97326)
Supplement: Figure 3—figure supplement 1—source data 1. [file elife-97326-fig3-figsupp1-data1.xlsx]

## Sheet: Figure 3–figure supplement 1A
Figure 3–figure supplement 1A	Data	Response time in the PBS and aDLS lesioned groups
	Subjects	n = 8 (PBS group) or 8 (IBO group)
	Softwear	SPSS ver. 27
	Dependent variable	Time (s)
	Stats	two-way ANOVA, day as repeated measure; day effect, F(2.728081,38.193131) = 2.866982, p = 0.053724 group effect, F(1,14) = 3.561991, p = 0.080025 day x group interaction, F(2.728081,38.193131) = 1.137242, p = 0.343263 adjusted by Greenhouse-Geisser ε 0.209852
	PBS group
			Day
			1	2	3	4	5	6	7	8	9	10	11	12	13	14
	animal ID	#1	0.520894	0.491278	0.3695	0.494167	0.400944	0.314556	0.321167	0.302389	0.2615	0.310667	0.327111	0.304833	0.290333	0.280889
		#2	0.631006	0.438111	0.383056	0.376333	0.427556	0.329167	0.454222	0.327333	0.352944	0.265444	0.351222	0.294889	0.266667	0.275389
		#3	0.788939	0.800111	0.492	0.477167	0.561222	0.412778	0.408333	0.345111	0.416	0.332667	0.382389	0.387278	0.298667	0.410833
		#4	0.52905	0.445944	0.343444	0.361722	0.374056	0.411778	0.388611	0.518222	0.469667	0.487056	0.523444	0.417778	0.390611	0.440278
		#5	0.562458	0.336833	0.395611	0.624389	0.597	0.713111	0.5395	0.577	0.390778	0.318667	0.312389	0.350167	0.334111	0.338556
		#6	0.518547	0.507778	0.385111	0.465111	0.547722	0.562722	0.548444	0.4785	0.367278	0.315611	0.311278	0.279167	0.293778	0.359111
		#7	0.89838	0.8075	0.559667	0.588333	0.436278	0.548278	0.565222	0.687	0.690389	0.695889	0.963333	1.22417	1.31294	1.23367
		#8	0.588939	0.510111	0.627833	0.350833	0.456611	0.354	0.373111	0.374556	0.311167	0.330111	0.318444	0.284278	0.2985	0.298889
	IBO group
			Day
			1	2	3	4	5	6	7	8	9	10	11	12	13	14
	animal ID	#1	1.70972	1.34411	0.977944	0.865667	0.633444	0.729	1.01878	1.10894	1.30911	1.299	1.521	1.71317	1.48394	2.04622
		#2	0.702067	0.490556	0.375389	0.523111	0.543333	0.549278	0.558167	0.689444	0.596667	0.570444	0.687944	0.753111	0.636556	0.672778
		#3	0.666927	0.336722	0.263222	0.257833	0.228167	0.326444	0.453444	0.503556	0.415056	0.315556	0.431278	0.422889	0.504833	0.403722
		#4	0.846872	0.700444	0.621556	0.524	0.493889	0.381389	0.319667	0.281889	0.301944	0.280833	0.305444	0.253389	0.379833	0.318778
		#5	0.812179	0.640389	0.5035	0.536222	0.724389	0.412667	0.546389	0.561778	0.517722	0.473833	0.468611	0.408833	0.435611	0.5035
		#6	0.815978	0.637111	0.505056	0.567333	0.595278	0.463611	0.607056	0.771889	0.618333	0.453667	0.478	0.503111	0.479611	0.495611
		#7	1.62061	1.38344	1.15728	0.889889	1.42067	1.46361	1.55989	1.75906	1.51411	1.70672	1.59422	1.61689	1.44811	1.38767
		#8	0.711899	0.620722	0.678111	0.726111	0.662778	0.564778	0.535278	0.5315	0.492	0.607	0.577444	1.66172	0.659611	0.704556

## Sheet: Figure 3–figure supplement 1B
Figure 3–figure supplement 1B	Data	Response time in the PBS and pVLS lesioned groups
	Subjects	n = 8 (PBS group) or 8 (IBO group)
	Softwear	SPSS ver. 27
	Dependent variable	Time (s)
	Stats	two-way ANOVA, day as repeated measure; day effect, F(2.889737,40.456316) = 6.230086, p = 0.001578 group effect, F(1,14) = 13.566322, p = 0.002458 day x group interaction, F(2.889737,40.456316) = 0.685117, p = 0.561136 adjusted by Greenhouse-Geisser ε 0.222287
	PBS group
			Day
			1	2	3	4	5	6	7	8	9	10	11	12	13	14
	animal ID	#1	0.774972	0.602667	0.392111	0.542333	0.523889	0.499167	0.477278	0.4655	0.432833	0.419444	0.395667	0.389167	0.369944	0.510889
		#2	0.747151	0.876389	0.507278	0.609389	0.431889	0.436278	0.419222	0.384667	0.414556	0.429167	0.373722	0.366222	0.355278	0.338111
		#3	0.680335	0.568944	0.390333	0.362278	0.315278	0.289556	0.307333	0.411111	0.332333	0.345056	0.329778	0.313056	0.297556	0.277444
		#4	0.375307	0.363278	0.351333	0.359611	0.395611	0.405056	0.455333	0.397722	0.449722	0.297444	0.322611	0.421	0.339333	0.390167
		#5	0.85905	0.793778	0.658944	0.491389	0.447889	0.387833	0.298	0.285	0.275667	0.303778	0.455056	0.3465	0.391167	0.286333
		#6	1.15168	1.38839	0.627333	0.716944	0.629278	0.968889	0.668	0.572278	0.489333	0.504111	0.504111	0.448778	0.445444	0.392111
		#7	0.645922	0.499167	0.325111	0.363056	0.242278	0.254167	0.329833	0.334444	0.278278	0.269556	0.392222	0.394444	0.393556	0.424444
		#8	0.706872	0.611556	0.650889	0.528056	0.408222	0.532444	0.355944	0.319556	0.302	0.261833	0.274167	0.248222	0.238222	0.242444
	IBO group
			Day
			1	2	3	4	5	6	7	8	9	10	11	12	13	14
	animal ID	#1	0.705754	0.823222	0.708333	0.834833	0.432056	0.561444	0.569222	0.475944	0.475944	0.429	0.469611	0.3795	0.375056	0.394
		#2	1.01827	1.60317	1.32522	1.49467	1.66722	1.56728	1.53478	1.4485	1.09178	1.07533	1.03078	1.00294	0.902667	1.06267
		#3	0.630223	0.438778	0.3155	0.427556	0.526611	1.19822	0.578778	0.753944	0.717333	0.642889	0.632278	0.583722	0.706444	0.807444
		#4	0.796201	0.582667	0.518556	0.581278	0.645778	0.682556	0.856667	0.7455	0.819333	0.754778	0.526167	0.449389	0.457778	0.429278
		#5	1.59648	1.51333	1.35594	1.41578	1.27833	0.991778	1.55156	1.39689	1.45167	1.41622	1.25089	1.27594	1.35328	1.304
		#6	0.81	0.722056	0.829167	0.884944	0.822444	0.739611	0.611833	0.432333	0.362556	0.6125	1.08439	0.923833	1.05006	1.00939
		#7	1.54575	1.76667	1.66944	2.04078	1.68417	1.25217	1.13606	1.01083	0.861278	0.759167	0.716889	0.549278	0.810056	0.496667
		#8	1.06855	1.38278	1.38356	0.8895	0.750611	0.637611	0.5055	0.492556	0.630722	0.535	0.592556	0.528833	0.572167	0.516167

## Sheet: Figure 3–figure supplement 1C
Figure 3–figure supplement 1C	Data	Response time in the PBS and DMS lesioned groups
	Subjects	n = 7 (PBS group) or 6 (IBO group)
	Softwear	SPSS ver. 27
	Dependent variable	Time (s)
	Stats	two-way ANOVA, day as repeated measure; day effect, F(3.123443,34.357871) = 4.659140, p = 0.007144 group effect, F(1,11) = 6.473956, p = 0.027266 day x group interaction, F(3.123443,34.357871) = 1.126813, p = 0.353106 adjusted by Greenhouse-Geisser ε 0.240265
	PBS group
			Day
			1	2	3	4	5	6	7	8	9	10	11	12	13	14
	animal ID	#1	0.933687	0.891944	0.691889	0.457944	0.394389	0.600722	0.433667	0.496222	0.431389	0.438611	0.394944	0.379778	0.354833	0.395722
		#2	0.664693	0.525778	0.466667	0.555167	0.483389	0.431944	0.463778	0.354056	0.390778	0.431333	0.4545	0.466333	0.340389	0.423056
		#3	0.875922	0.899778	1.045	0.966944	0.574278	0.543444	0.538889	0.496889	0.472778	0.453556	0.611833	0.505556	0.503222	0.614278
		#4	0.753911	0.843778	0.818222	0.689111	0.675556	0.755389	0.660778	0.516333	0.573778	0.5185	0.714222	0.651444	0.806611	0.688278
		#5	0.633017	0.441222	0.349333	0.397056	0.354778	0.411333	0.386111	0.421389	0.396056	0.384667	0.432111	0.447278	0.413556	0.399889
		#6	0.427151	0.650333	0.436333	0.380556	0.238278	0.247389	0.280444	0.236444	0.201667	0.1725	0.242722	0.222556	0.239222	0.226833
		#7	0.930556	0.633056	0.448833	0.420833	0.442389	0.460278	0.402333	0.368333	0.415778	0.386389	0.425278	0.521889	0.463222	0.434611
	IBO group
			Day
			1	2	3	4	5	6	7	8	9	10	11	12	13	14
	animal ID	#1	0.696983	0.744944	0.507444	0.384111	0.499278	0.473611	0.523444	0.453278	0.484667	0.407722	0.541389	0.503278	0.468389	0.624556
		#2	1.32777	1.32022	1.02172	1.44139	1.25972	0.656111	0.5875	0.7185	0.714667	0.532889	0.478722	0.296722	0.420056	0.484389
		#3	0.634022	0.705889	0.685	0.4925	0.650667	0.512556	0.599833	0.4395	0.475	0.544722	0.655778	0.656	0.694111	0.847222
		#4	0.793575	0.67	0.921333	0.797611	0.996111	0.958	0.855667	1.03128	0.961278	0.8275	0.971667	0.832667	0.763333	0.785667
		#5	0.600782	0.714389	0.568667	0.879389	0.701833	0.778333	0.4445	0.573833	0.565222	0.379778	0.820222	0.559	0.478889	0.522556
		#6	0.992123	1.17889	1.65439	0.969444	1.28911	0.680611	0.941833	0.899444	1.65233	0.967	1.46911	1.19089	0.900111	1.05089

## Sheet: Figure 3–figure supplement 1D
Figure 3–figure supplement 1D	Data	Omission rate in the PBS and aDLS lesioned groups
	Subjects	n = 8 (PBS group) or 8 (IBO group)
	Softwear	SPSS ver. 27
	Dependent variable	Omission rate (%)
	Stats	two-way ANOVA, day as repeated measure; day effect, F(1.066243,14.927407) = 1.037569, p = 0.330082 group effect, F(1,14) = 1.040686, p = 0.324968 day x group interaction, F(1.066243,14.927407) = 0.800232, p = 0.393051 adjusted by Greenhouse-Geisser ε 0.082019
	PBS group
			Day
			1	2	3	4	5	6	7	8	9	10	11	12	13	14
	animal ID	#1	0	0	0	0	0	0	0	0	0	0	0	0	0	0
		#2	0	0	0	0	0	0	0	0	0	0	0	0	0	0
		#3	0.0333333	0.0111111	0.0111111	0	0	0	0	0	0	0	0	0	0	0
		#4	0	0	0	0	0	0	0	0	0	0	0	0	0	0
		#5	0.0111111	0	0	0	0	0	0	0	0	0	0	0	0	0
		#6	0.0111111	0	0	0	0	0	0	0	0	0	0	0	0	0
		#7	0	0	0	0	0	0	0	0	0	0	0	0	0	0.0222222
		#8	0	0	0	0	0	0	0	0	0	0	0	0	0	0
	IBO group
			Day
			1	2	3	4	5	6	7	8	9	10	11	12	13	14
	animal ID	#1	0.670455	0.683333	0.687151	0.611111	0.683333	0.511111	0.47486	0.5	0.383333	0.45	0.49162	0.463277	0.474576	0.528409
		#2	0	0	0	0	0	0.0111111	0	0	0	0	0	0	0	0
		#3	0	0	0	0.0111111	0	0	0	0	0	0	0	0	0	0
		#4	0	0	0	0	0	0	0	0	0	0	0	0	0	0
		#5	0	0	0	0	0	0	0	0	0	0	0	0	0	0
		#6	0	0	0	0	0	0	0	0.0111111	0	0	0	0	0	0
		#7	0	0.0222222	0	0.0111111	0.0111111	0.0222222	0.0111111	0.0222222	0.0222222	0	0.0111111	0	0	0
		#8	0	0	0	0	0	0	0	0	0	0	0.0111111	0.0444444	0	0

## Sheet: Figure 3–figure supplement 1E
Figure 3–figure supplement 1E	Data	Omission rate in the PBS and pVLS lesioned groups
	Subjects	n = 8 (PBS group) or 8 (IBO group)
	Softwear	SPSS ver. 27
	Dependent variable	Omission rate (%)
	Stats	two-way ANOVA, day as repeated measure; day effect, F(1.383691,19.371671) = 1.482640, p = 0.246946 group effect, F(1,14) = 2.296715, p = 0.151897 day x group interaction, F(1.383691,19.371671) = 1.139721, p = 0.320162 adjusted by Greenhouse-Geisser ε 0.106438
	PBS group
			Day
			1	2	3	4	5	6	7	8	9	10	11	12	13	14
	animal ID	#1	0	1.11111	0	0	0	0	0	0	0	0	0	0	0	0
		#2	0	0	0	0	0	0	0	0	0	0	0	0	0	0
		#3	1.11111	0	0	0	0	0	0	0	0	0	0	0	0	0
		#4	0	0	0	0	0	0	0	0	0	0	0	0	0	0
		#5	0	0	0	0	0	0	0	0	0	0	1.11111	0	0	0
		#6	0	0	1.11111	0	0	0	0	0	0	0	0	0	0	0
		#7	0	0	0	0	0	0	0	0	0	0	0	0	0	0
		#8	0	0	0	0	0	0	0	0	0	0	0	0	0	0
	IBO group
			Day
			1	2	3	4	5	6	7	8	9	10	11	12	13	14
	animal ID	#1	0	0	1.11111	0	0	0	0	0	0	0	0	0	0	0
		#2	0	0	0	1.11111	0	1.11111	0	1.11111	1.11111	1.11111	0	0	0	0
		#3	0	0	0	0	0	0	0	0	0	0	0	0	0	0
		#4	0	0	0	0	0	0	0	0	0	0	0	0	0	0
		#5	13.3333	4.44444	6.66667	3.33333	2.22222	0	0	0	1.11111	0	0	0	0	0
		#6	0	0	0	0	0	0	0	0	0	0	0	0	0	0
		#7	1.11111	1.11111	3.33333	5.55556	1.11111	0	1.11111	0	0	0	1.11111	0	0	0
		#8	0.0111111	0	0	0	0	0	0	0	0	0	0	0	0	0

## Sheet: Figure 3–figure supplement 1F
Figure 3–figure supplement 1F	Data	Omission rate in the PBS and DMS lesioned groups
	Subjects	n = 7 (PBS group) or 6 (IBO group)
	Softwear	SPSS ver. 27
	Dependent variable	Omission rate (%)
	Stats	two-way ANOVA, day as repeated measure; day effect, F(3.118742,34.306166) = 2.397568, p = 0.082834 group effect, F(1,11) = 0.950067, p = 0.350650 day x group interaction, F(3.118742,34.306166) = 0.951428, p = 0.429396 adjusted by Greenhouse-Geisser ε 0.239903
	PBS group
			Day
			1	2	3	4	5	6	7	8	9	10	11	12	13	14
	animal ID	#1	0	0	0	0	0	0	0	0	0.0111111	0	0	0	0	0
		#2	0	0	0	0	0.0222222	0	0	0	0	0	0	0	0	0
		#3	0	0	0	0	0	0	0	0	0	0	0	0	0	0
		#4	0.0111111	0.0333333	0.0111111	0	0.0222222	0.0111111	0	0	0	0	0	0	0	0.0111111
		#5	0	0	0	0	0	0	0	0	0	0	0	0	0	0
		#6	0	0	0	0	0	0	0	0	0	0	0	0	0	0
		#7	0	0	0	0	0	0	0	0	0	0	0	0	0	0
	IBO group
			Day
			1	2	3	4	5	6	7	8	9	10	11	12	13	14
	animal ID	#1	0	0	0	0	0	0	0	0	0	0	0	0	0	0
		#2	0.0111111	0	0	0	0	0	0	0	0	0	0	0	0	0
		#3	0	0	0.0111111	0	0	0	0	0	0.0222222	0	0.0111111	0	0	0
		#4	0	0	0	0	0.0111111	0	0	0	0.0111111	0	0.0111111	0	0	0
		#5	0	0.0111111	0	0	0	0	0	0	0	0	0	0.0111111	0	0
		#6	0.0222222	0.0222222	0.0222222	0	0.0222222	0.0111111	0	0.0222222	0.0222222	0	0.0111111	0	0	0

## Sheet: Figure 3–figure supplement 1G
Figure 3–figure supplement 1G	Data	Response bias in the PBS and aDLS lesioned groups
	Subjects	n = 8 (PBS group) or 8 (IBO group)
	Softwear	SPSS ver. 27
	Dependent variable	Response bias
	Stats	two-way ANOVA, day as repeated measure; day effect, F(2.573339,36.026741) = 0.748001, p = 0.511770 group effect, F(1,14) = 0.008197, p = 0.929144 day x group interaction, F(2.573339,36.026741) = 0.852951, p = 0.459468 adjusted by Greenhouse-Geisser ε 0.197949
	PBS group
			Day
			1	2	3	4	5	6	7	8	9	10	11	12	13	14
	animal ID	#1	0.854749	0.5	0.538889	0.577778	0.511111	0.416667	0.466667	0.488889	0.5	0.522222	0.522222	0.522222	0.483333	0.5
		#2	0.424581	0.722222	0.472222	0.266667	0.327778	0.5	0.377778	0.505556	0.483333	0.45	0.5	0.483333	0.505556	0.5
		#3	0.590909	0.608939	0.776536	0.566667	0.522222	0.505556	0.505556	0.538889	0.5	0.505556	0.5	0.527778	0.5	0.488889
		#4	0.480447	0.777778	0.744444	0.5	0.644444	0.588889	0.561111	0.638889	0.588889	0.555556	0.5	0.555556	0.522222	0.494444
		#5	0.320225	0.0388889	0.0777778	0.25	0.133333	0.377778	0.477778	0.538889	0.538889	0.522222	0.494444	0.55	0.55	0.544444
		#6	0.0955056	0.383333	0.672222	0.622222	0.516667	0.483333	0.45	0.488889	0.5	0.511111	0.483333	0.5	0.505556	0.516667
		#7	0.24581	0.394444	0.65	0.466667	0.511111	0.433333	0.466667	0.483333	0.444444	0.455556	0.533333	0.505556	0.5	0.516854
		#8	0.27933	0.705556	0.555556	0.516667	0.483333	0.538889	0.505556	0.522222	0.494444	0.494444	0.516667	0.533333	0.527778	0.511111
	IBO group
			Day
			1	2	3	4	5	6	7	8	9	10	11	12	13	14
	animal ID	#1	0.670455	0.683333	0.687151	0.611111	0.683333	0.511111	0.47486	0.5	0.383333	0.45	0.49162	0.463277	0.474576	0.528409
		#2	0.776536	0.927778	0.972222	0.95	0.877778	0.75419	0.6	0.65	0.577778	0.577778	0.511111	0.55	0.533333	0.522222
		#3	0.402235	0.266667	0.116667	0.312849	0.477778	0.516667	0.627778	0.616667	0.411111	0.433333	0.427778	0.477778	0.522222	0.505556
		#4	0.435754	0.305556	0.433333	0.533333	0.411111	0.511111	0.627778	0.644444	0.716667	0.655556	0.483333	0.283333	0.505556	0.505556
		#5	0.452514	0.455556	0.361111	0.5	0.455556	0.438889	0.305556	0.416667	0.544444	0.483333	0.55	0.572222	0.516667	0.527778
		#6	0.145251	0.0611111	0.116667	0.438889	0.672222	0.688889	0.544444	0.519553	0.511111	0.455556	0.488889	0.461111	0.466667	0.461111
		#7	0.134078	0.0898876	0.144444	0.212291	0.374302	0.382022	0.469274	0.561798	0.55618	0.505556	0.463687	0.516667	0.5	0.483333
		#8	0.273743	0.6	0.861111	0.861111	0.794444	0.633333	0.361111	0.411111	0.255556	0.338889	0.47486	0.647727	0.455556	0.522222

## Sheet: Figure 3–figure supplement 1H
Figure 3–figure supplement 1H	Data	Response bias in the PBS and pVLS lesioned groups
	Subjects	n = 8 (PBS group) or 8 (IBO group)
	Softwear	SPSS ver. 27
	Dependent variable	Response bias
	Stats	two-way ANOVA, day as repeated measure; day effect, F(2.522645,35.317032) = 0.430306, p = 0.699243 group effect, F(1,14) = 0.007842, p = 0.930690 day x group interaction, F(2.522645,35.317032) = 0.349237, p = 0.755616 adjusted by Greenhouse-Geisser ε 0.194050
	PBS group
			Day
			1	2	3	4	5	6	7	8	9	10	11	12	13	14
	animal ID	#1	0.49162	0.642458	0.605556	0.55	0.538889	0.35	0.383333	0.422222	0.538889	0.55	0.55	0.538889	0.555556	0.522222
		#2	0.223464	0.0722222	0.388889	0.577778	0.638889	0.516667	0.538889	0.511111	0.538889	0.494444	0.5	0.527778	0.488889	0.494444
		#3	0.466292	0.344444	0.766667	0.611111	0.661111	0.583333	0.544444	0.505556	0.511111	0.505556	0.5	0.494444	0.5	0.5
		#4	0.944134	1	0.794444	0.65	0.466667	0.494444	0.5	0.516667	0.494444	0.516667	0.505556	0.5	0.505556	0.505556
		#5	0.273743	0.322222	0.483333	0.505556	0.505556	0.45	0.45	0.488889	0.483333	0.577778	0.513966	0.516667	0.494444	0.5
		#6	0.49162	0.361111	0.290503	0.333333	0.183333	0.133333	0.522222	0.694444	0.755556	0.777778	0.655556	0.594444	0.533333	0.5
		#7	0.0782123	0.294444	0.483333	0.644444	0.622222	0.572222	0.488889	0.505556	0.494444	0.511111	0.516667	0.466667	0.511111	0.488889
		#8	0.860335	0.944444	0.761111	0.494444	0.405556	0.555556	0.483333	0.494444	0.511111	0.488889	0.505556	0.472222	0.488889	0.5
	IBO group
			Day
			1	2	3	4	5	6	7	8	9	10	11	12	13	14
	animal ID	#1	0.843575	0.983333	0.927374	0.805556	0.411111	0.422222	0.405556	0.511111	0.533333	0.455556	0.472222	0.494444	0.466667	0.494444
		#2	0.351955	0.283333	0.177778	0.162011	0.238889	0.307263	0.505556	0.681564	0.793296	0.670391	0.605556	0.561111	0.522222	0.577778
		#3	0.581006	0.855556	0.944444	0.866667	0.883333	0.716667	0.755556	0.533333	0.483333	0.522222	0.477778	0.516667	0.527778	0.516667
		#4	0.513966	0.25	0.344444	0.488889	0.638889	0.611111	0.577778	0.572222	0.55	0.555556	0.472222	0.516667	0.5	0.483333
		#5	0.401198	0.272727	0.166667	0.135593	0.264045	0.122222	0.383333	0.388889	0.413408	0.511111	0.394444	0.45	0.438889	0.461111
		#6	0.821229	0.916667	0.833333	0.866667	0.972222	0.988889	0.966667	0.905556	0.983333	0.95	0.788889	0.772222	0.644444	0.544444
		#7	0.38764	0.256983	0.214689	0.16	0.178771	0.266667	0.335196	0.283333	0.288889	0.422222	0.284916	0.377778	0.366667	0.322222
		#8	0.52809	0.316667	0.344444	0.322222	0.361111	0.394444	0.572222	0.472222	0.527778	0.55	0.527778	0.516667	0.555556	0.511111

## Sheet: Figure 3–figure supplement 1I
Figure 3–figure supplement 1I	Data	Response bias in the PBS and DMS lesioned groups
	Subjects	n = 7 (PBS group) or 6 (IBO group)
	Softwear	SPSS ver. 27
	Dependent variable	Response bias
	Stats	two-way ANOVA, day as repeated measure; day effect, F(2.428939,26.718327) = 1.286477, p = 0.296710 group effect, F(1,11) = 0.000024, p = 0.996215 day x group interaction, F(2.428939,26.718327) = 0.348492, p = 0.748936 adjusted by Greenhouse-Geisser ε 0.186841
	PBS group
			Day
			1	2	3	4	5	6	7	8	9	10	11	12	13	14
	animal ID	#1	0.234637	0.183333	0.472222	0.577778	0.583333	0.511111	0.5	0.511111	0.52514	0.461111	0.494444	0.488889	0.522222	0.522222
		#2	0.547486	0.477778	0.361111	0.355556	0.365169	0.45	0.5	0.494444	0.494444	0.494444	0.516667	0.5	0.5	0.511111
		#3	0.0726257	0.172222	0.322222	0.388889	0.461111	0.527778	0.483333	0.5	0.527778	0.527778	0.477778	0.55	0.511111	0.488889
		#4	0.38764	0.107345	0.156425	0.166667	0.224719	0.268156	0.577778	0.694444	0.561111	0.561111	0.683333	0.55	0.455556	0.50838
		#5	0.396648	0.605556	0.605556	0.527778	0.45	0.527778	0.566667	0.555556	0.583333	0.594444	0.572222	0.555556	0.561111	0.544444
		#6	0.430168	0.627778	0.688889	0.522222	0.538889	0.544444	0.511111	0.494444	0.544444	0.505556	0.494444	0.522222	0.483333	0.511111
		#7	0.661111	0.883333	0.383333	0.211111	0.288889	0.472222	0.488889	0.494444	0.505556	0.5	0.494444	0.511111	0.494444	0.494444
	IBO group
			Day
			1	2	3	4	5	6	7	8	9	10	11	12	13	14
	animal ID	#1	0.0949721	0.116667	0.477778	0.583333	0.622222	0.522222	0.466667	0.5	0.527778	0.522222	0.5	0.505556	0.494444	0.5
		#2	0.134831	0.127778	0.172222	0.238889	0.533333	0.666667	0.538889	0.655556	0.727778	0.6	0.527778	0.527778	0.511111	0.483333
		#3	0.357542	0.588889	0.463687	0.411111	0.444444	0.35	0.194444	0.244444	0.421348	0.461111	0.486034	0.483333	0.494444	0.488889
		#4	0.815642	0.894444	0.75	0.8	0.513966	0.511111	0.394444	0.461111	0.50838	0.527778	0.519553	0.5	0.511111	0.511111
		#5	0.497207	0.396648	0.316667	0.416667	0.594444	0.444444	0.511111	0.5	0.488889	0.511111	0.566667	0.50838	0.505556	0.527778
		#6	0.412429	0.578652	0.47191	0.322222	0.426966	0.363128	0.711111	0.483146	0.516854	0.427778	0.424581	0.433333	0.455556	0.488889
