# Supplementary material for: Acquisition of auditory discrimination mediated by different processes through two distinct circuits linked to the lateral striatum
Source: eLife. 2025 Jul 11;13:RP97326. doi: 10.7554/eLife.97326 (PMC12252547; doi:10.7554/eLife.97326)
Supplement: Figure 3—figure supplement 2—source data 1. [file elife-97326-fig3-figsupp2-data1.xlsx]

## Sheet: Figure 3–figure supplement 2A
Figure 3–figure supplement 2A	Data	The amount of food intake for 60 min in the PBS and aDLS lesioned groups
	Subjects	n = 8 (PBS group) or 8 (IBO group)
	Softwear	SPSS ver. 27
	Dependent variable	Amount of intake (g)
	Stats	unpaired Student’s t-test; CE2, t(14) = 0.100969, p = 0.921007 pellet, t(14) = 0.795890, p = 0.439383
	CE2						Pellet
			Application	Amount of intake					Application	Amount of intake
	animal ID	#1	PBS	12.4			animal ID	#1	PBS	16.7
		#2		13.3				#2		16.6
		#3		12.9				#3		20.7
		#4		6.8				#4		24.1
		#5		27.1				#5		25
		#6		10.4				#6		17.3
		#7		9.9				#7		19.4
		#8		6.8				#8		20.3
		#1	IBO	21.9				#1	IBO	20.9
		#2		4.3				#2		10.3
		#3		11				#3		28
		#4		13.9				#4		24.5
		#5		5.6				#5		19.6
		#6		7.7				#6		21
		#7		10				#7		22.5
		#8		28.2				#8		27.9

## Sheet: Figure 3–figure supplement 2B
Figure 3–figure supplement 2B	Data	The amount of food intake for 60 min in the PBS and pVLS lesioned groups
	Subjects	n = 8 (PBS group) or 8 (IBO group)
	Softwear	SPSS ver. 27
	Dependent variable	Amount of intake (g)
	Stats	unpaired Student’s t-test; CE2, t(14) = 0.345145, p = 0.735116 pellet, t(14) = 0.200582, p = 0.843910
	CE2						Pellet
			Application	Amount of intake					Application	Amount of intake
	animal ID	#1	PBS	10.7			animal ID	#1	PBS	23.5
		#2		5.9				#2		24.2
		#3		11.4				#3		24.3
		#4		11.6				#4		25.7
		#5		10.7				#5		17.8
		#6		23.1				#6		22.7
		#7		9.3				#7		23.6
		#8		12				#8		20.9
		#1	IBO	19				#1	IBO	23
		#2		11.8				#2		15.9
		#3		12.3				#3		22.5
		#4		11.4				#4		24.8
		#5		7.4				#5		20.9
		#6		8.2				#6		27.4
		#7		9.2				#7		28.2
		#8		9.4				#8		22.6

## Sheet: Figure 3–figure supplement 2C
Figure 3–figure supplement 2C	Data	Locomotor activity in home cage in the PBS and aDLS lesioned groups
	Subjects	n = 8 (PBS group) or 8 (IBO group)
	Softwear	SPSS ver. 27
	Dependent variable	Number of beam breaks
	Stats	two-way ANOVA, session as repeated measure; session effect, F(2.213869,30.994160) = 34.081791, p = 0.0000000068051 group effect, F(1,14) = 0.529934, p = 0.478634 session x group interaction, F(2.213869,30.994160) = 0.348434, p = 0.729704 adjusted by Greenhouse-Geisser ε 0.442774
				Session
			Application	1	2	3	4	5	6
	animal ID	#1	PBS	4621	2549	947	172	0	162
		#2		3379	1063	195	297	913	717
		#3		3072	1891	1493	903	2801	2178
		#4		2490	1264	1022	825	972	1027
		#5		2454	1201	941	806	653	379
		#6		2308	1183	1091	1349	1221	1423
		#7		3266	2011	1998	2104	2509	2193
		#8		2728	2148	1095	1218	1147	1878
		#1	IBO	2457	1168	926	431	13	875
		#2		3793	2320	1066	3	1325	322
		#3		2624	1720	1867	1216	2010	1432
		#4		2444	2051	1144	1083	799	1170
		#5		2770	997	625	278	258	53
		#6		3679	1092	868	852	1210	833
		#7		3275	2159	1657	2050	1293	1242
		#8		2251	1171	699	1333	1371	648

## Sheet: Figure 3–figure supplement 2D
Figure 3–figure supplement 2D	Data	Locomotor activity in home cage in the PBS and pVLS lesioned groups
	Subjects	n = 8 (PBS group) or 8 (IBO group)
	Softwear	SPSS ver. 27
	Dependent variable	Number of beam breaks
	Stats	two-way ANOVA, session as repeated measure; session effect, F(5,70) = 79.019610, p = 0.0000000000000000000000000021214 group effect, F(1,14) = 0.558777, p = 0.467124 session x group interaction, F(5,70) = 0.381542, p = 0.859817
				Session
			Application	1	2	3	4	5	6
	animal ID	#1	PBS	4316	736	547	993	323	947
		#2		4184	1284	711	1622	1557	2237
		#3		3785	1757	511	1129	844	10
		#4		3201	1360	518	1052	1288	643
		#5		3029	1893	1379	1594	767	723
		#6		3388	1140	1009	568	323	90
		#7		3042	1143	450	232	641	68
		#8		4380	2875	1587	685	477	31
		#1	IBO	3994	2785	2830	1424	2021	3003
		#2		3152	358	4	71	9	42
		#3		3648	710	1064	551	779	392
		#4		4347	3027	945	857	965	922
		#5		3912	2337	1094	1559	818	797
		#6		3306	1434	674	779	49	169
		#7		3919	2620	2729	2111	1292	311
		#8		3818	1931	489	646	925	731
