# Supplementary material for: Acquisition of auditory discrimination mediated by different processes through two distinct circuits linked to the lateral striatum
Source: eLife. 2025 Jul 11;13:RP97326. doi: 10.7554/eLife.97326 (PMC12252547; doi:10.7554/eLife.97326)
Supplement: Figure 3—source data 1. [file elife-97326-fig3-data1.xlsx]

## Sheet: Fig. 3D
Fig. 3D	Data	Learning curves during the single lever press task in the groups injected into the aDLS
	Subjects	n = 8 (PBS group) and 8 (IBO group)
	Softwear	SPSS ver. 27
	Dependent variable	Number of lever press
	Stats	two-way ANOVA, day as repeated measure; day effect, F(1.512220,21.171086) = 26.281205, p = 0.000007 group effect, F(1,14) = 1.275062, p = 0.277797 day x group interaction, F(1.512220,21.171086) = 0.833699, p = 0.417980 adjusted by Greenhouse-Geisser ε 0.504073
	PBS group							IBO group
			Day							Day
			1	2	3	4				1	2	3	4
	animal ID	#1	78	89	90	90		animal ID	#1	26	49	59	86
		#2	54	90	90	89			#2	70	89	90	90
		#3	41	81	90	90			#3	80	87	90	90
		#4	65	90	90	90			#4	77	85	89	90
		#5	79	87	90	90			#5	83	87	90	90
		#6	84	90	90	90			#6	70	83	90	90
		#7	56	83	90	90			#7	45	51	67	78
		#8	86	90	90	90			#8	68	90	89	88

## Sheet: Fig. 3E
Fig. 3E	Data	Learning curves during the single lever press task in the groups injected into the pVLS
	Subjects	n = 8 (PBS group) or 8 (IBO group)
	Softwear	SPSS ver. 27
	Dependent variable	Number of lever press
	Stats	two-way ANOVA, day as repeated measure; day effect, F(1.546975,21.657651) = 40.183003, p = 0.00000022222 group effect, F(1,14) = 2.541897, p = 0.133181 day x group interaction, F(1.546975,21.657651) = 0.952792, p = 0.379609 adjusted by Greenhouse-Geisser ε 0.515658
	PBS group							IBO group
			Day								Day
			1	2	3	4					1	2	3	4
	animal ID	#1	70	82	86	89			animal ID	#1	79	88	90	90
		#2	78	88	90	90				#2	42	48	88	90
		#3	65	85	90	90				#3	63	87	90	89
		#4	76	89	90	90				#4	77	89	90	90
		#5	56	54	90	89				#5	50	67	77	85
		#6	53	82	88	90				#6	51	78	88	90
		#7	73	88	90	90				#7	53	71	81	84
		#8	81	88	90	90				#8	62	77	85	88

## Sheet: Fig. 3F
Fig. 3F	Data	Learning curves during the single lever press task in the groups injected into the DMS
	Subjects	n = 7 (PBS group) or 6 (IBO group)
	Softwear	SPSS ver. 27
	Dependent variable	Number of lever press
	Stats	two-way ANOVA, day as repeated measure; day effect, F(1.204711,13.251819) = 14.817547, p = 0.001317 group effect, F(1,11) = 0.025460, p = 0.876119 day x group interaction, F(1.204711,13.251819) = 0.610411, p = 0.477872 adjusted by Greenhouse-Geisser ε 0.401570
	PBS group							IBO group
			Day								Day
			1	2	3	4					1	2	3	4
	animal ID	#1	69	84	90	90			animal ID	#1	80	90	90	90
		#2	59	78	87	89				#2	72	86	89	87
		#3	71	78	88	90				#3	79	88	90	90
		#4	32	69	83	89				#4	71	78	88	89
		#5	54	86	89	90				#5	75	84	90	89
		#6	77	89	90	90				#6	8	6	73	87
		#7	55	74	84	87

## Sheet: Fig. 3G
Fig. 3G	Data	Learning curves during the auditory discrimination task in the groups injected into the aDLS
	Subjects	n = 8 (PBS group) or 8 (IBO group)
	Softwear	SPSS ver. 27
	Dependent variable	Success rate (%)
	Stats	two-way ANOVA, day as repeated measure; day effect, F(2.805317,39.274442) = 60.732591, p = 0.000000000000018228 group effect, F(1,14) = 11.577837, p = 0.004290 day x group interaction, F(2.805317,39.274442) = 3.863467, p = 0.018199 adjusted by Greenhouse-Geisser ε 0.215794 Simple main effect analysis (PBS vs. IBO); day 1, p = 0.139543 day 2, p = 0.084676 day 3, p = 0.284135 day 4, p = 0.067861 da…
	PBS group
			Day
			1	2	3	4	5	6	7	8	9	10	11	12	13	14
	animal ID	#1	55.8659	63.3333	72.7778	68.8889	78.8889	87.2222	93.3333	94.4444	96.6667	93.3333	96.6667	95.5556	98.3333	97.7778
		#2	65.9218	65.5556	63.8889	62.2222	76.1111	82.2222	82.2222	93.8889	93.8889	89.4444	95.5556	97.2222	97.2222	96.6667
		#3	54.5455	55.3073	58.1006	82.2222	84.4444	87.2222	90.5556	93.8889	92.2222	92.7778	92.2222	89.4444	92.2222	90
		#4	54.1899	51.1111	46.6667	48.8889	51.1111	65.5556	76.1111	79.4444	84.4444	88.8889	86.6667	90	87.7778	91.6667
		#5	41.573	49.4444	46.6667	53.8889	63.3333	81.1111	91.1111	91.6667	88.3333	91.1111	95	93.8889	91.6667	91.1111
		#6	56.1798	58.3333	52.7778	62.2222	80.5556	89.4444	87.2222	90	93.3333	96.6667	95	96.6667	95	96.1111
		#7	53.6313	59.4444	59.4444	81.1111	83.3333	84.4444	88.8889	93.8889	88.8889	88.8889	96.6667	97.2222	97.7778	97.191
		#8	56.9832	55	73.3333	89.4444	93.8889	92.7778	95	92.2222	95	95	95	93.3333	97.2222	97.7778
	IBO group
			Day
			1	2	3	4	5	6	7	8	9	10	11	12	13	14
	animal ID	#1	50.5682	49.4444	43.5754	43.3333	47.2222	50	63.6872	76.6667	71.6667	85	89.3855	88.1356	93.7853	94.8864
		#2	47.486	48.3333	49.4444	52.7778	52.2222	63.1285	75.5556	80.5556	86.6667	86.6667	82.2222	91.6667	95.5556	95.5556
		#3	49.7207	47.7778	52.7778	51.3966	56.6667	55	56.1111	55	73.3333	86.6667	88.3333	86.6667	92.2222	91.6667
		#4	43.5754	48.3333	52.2222	61.1111	56.6667	50	51.6667	46.6667	51.6667	48.8889	49.4444	53.8889	69.4444	78.3333
		#5	58.1006	64.4444	62.7778	67.7778	63.3333	50.5556	63.8889	66.1111	77.7778	88.3333	88.3333	90.5556	92.7778	95
		#6	55.8659	53.8889	59.4444	58.3333	63.8889	66.6667	78.8889	87.7095	91.1111	94.4444	90	92.7778	94.4444	95
		#7	53.0726	55.618	63.3333	68.7151	81.0056	78.6517	87.1508	87.0787	89.8876	89.4444	93.2961	89.4444	95.5556	88.3333
		#8	41.8994	46.6667	50.5556	50.5556	46.1111	56.6667	56.1111	54.4444	43.3333	53.8889	53.0726	51.7045	66.6667	82.2222

## Sheet: Fig. 3H
Fig. 3H	Data	Learning curves during the auditory discrimination task in the groups injected into the pVLS
	Subjects	n = 8 (PBS group) or 8 (IBO group)
	Softwear	SPSS ver. 27
	Dependent variable	Success rate (%)
	Stats	two-way ANOVA, day as repeated measure; day effect, F(3.645753,51.040543) = 51.793821, p = 0.000000000000000092307 group effect, F(1,14) = 7.221486, p = 0.017692 day x group interaction, F(3.645753,51.040543) = 1.611557, p = 0.190007 adjusted by Greenhouse-Geisser ε 0.280443
	PBS group
			Day
			1	2	3	4	5	6	7	8	9	10	11	12	13	14
	animal ID	#1	50.2793	63.1285	56.1111	51.6667	53.8889	50.5556	67.2222	84.4444	86.1111	83.8889	92.7778	89.4444	93.3333	95.5556
		#2	46.9274	53.8889	74.4444	72.2222	76.1111	92.7778	93.8889	94.4444	88.3333	96.1111	97.7778	97.2222	96.6667	96.1111
		#3	55.618	46.6667	53.3333	52.2222	57.2222	89.4444	95.5556	97.2222	98.8889	99.4444	97.7778	98.3333	100	100
		#4	51.3966	50	57.2222	62.7778	84.4444	92.7778	97.7778	98.3333	98.3333	93.8889	98.3333	97.7778	98.3333	98.3333
		#5	47.486	48.8889	77.2222	88.3333	89.4444	83.8889	91.6667	92.2222	93.8889	85.5556	88.2682	93.8889	96.1111	98.8889
		#6	42.4581	43.8889	49.162	48.8889	46.1111	54.4444	51.1111	62.7778	61.1111	54.4444	58.8889	80.5556	84.4444	88.8889
		#7	49.162	52.7778	45	50	52.2222	82.7778	94.4444	96.1111	95	96.6667	98.3333	92.2222	94.4444	97.7778
		#8	48.6034	57.2222	57.2222	65	63.3333	70	67.7778	85	93.3333	92.2222	95.5556	95.5556	98.3333	97.7778
	IBO group
			Day
			1	2	3	4	5	6	7	8	9	10	11	12	13	14
	animal ID	#1	45.2514	50.5556	51.9553	53.8889	63.3333	77.7778	80.5556	86.6667	88.8889	88.8889	91.6667	95	93.3333	91.6667
		#2	46.3687	55	55.5556	51.9553	50.5556	54.1899	62.7778	54.7486	56.9832	61.4525	70.5556	89.4444	92.2222	88.8889
		#3	46.3687	47.7778	50	53.3333	51.6667	66.1111	70	83.3333	86.1111	88.8889	87.7778	93.8889	93.8889	91.6667
		#4	46.3687	53.8889	54.4444	62.2222	56.1111	65.5556	82.2222	90.5556	88.3333	94.4444	95	98.3333	95.5556	97.2222
		#5	37.1257	48.2955	47.7011	53.6723	52.2472	48.8889	63.8889	72.2222	82.6816	65.5556	81.6667	81.6667	83.8889	88.3333
		#6	47.486	47.2222	46.6667	43.3333	49.4444	50	53.3333	52.7778	48.3333	51.6667	67.7778	69.4444	81.1111	91.1111
		#7	47.191	50.838	50.2825	54.2857	51.3966	54.4444	59.2179	58.3333	52.2222	54.4444	49.7207	57.7778	57.7778	52.2222
		#8	46.6292	52.7778	58.8889	50	66.1111	60.5556	59.4444	58.3333	72.7778	67.2222	87.2222	81.6667	83.3333	84.4444

## Sheet: Fig. 3I
Fig. 3I	Data	Learning curves during the auditory discrimination task in the groups injected into the DMS
	Subjects	n = 7 (PBS group) or 6 ( IBO group)
	Softwear	SPSS ver. 27
	Dependent variable	Success rate (%)
	Stats	two-way ANOVA, day as repeated measure; day effect, F(2.677463,29.452088) = 48.860431, p = 0.000000000038838 group effect, F(1,11) = 0.469433, p = 0.507429 day x group interaction, F(2.677463,29.452088) =1.094136, p = 0.362230 adjusted by Greenhouse-Geisser ε 0.205959
	PBS group
			Day
			1	2	3	4	5	6	7	8	9	10	11	12	13	14
	animal ID	#1	46.9274	47.2222	73.8889	78.8889	82.7778	88.8889	95.5556	87.7778	91.6201	91.6667	95	94.4444	97.7778	95.5556
		#2	43.0168	46.6667	50.5556	57.7778	76.9663	85	90	90.5556	95	96.1111	96.1111	97.7778	95.5556	97.7778
		#3	52.514	61.6667	61.1111	66.6667	66.1111	78.3333	86.1111	93.3333	95	95	94.4444	95	96.6667	96.6667
		#4	53.9326	48.5876	47.486	51.1111	53.3708	52.514	43.3333	52.7778	45	57.2222	66.1111	83.8889	92.2222	92.7374
		#5	50.2793	51.6667	48.3333	66.1111	65	70.5556	80	73.3333	77.2222	82.7778	90.5556	87.7778	89.4444	95.5556
		#6	64.2458	68.3333	63.3333	67.7778	86.1111	90	97.7778	97.2222	93.3333	97.2222	96.1111	95.5556	98.3333	97.7778
		#7	41.6667	50.5556	41.6667	55.5556	67.7778	92.7778	94.4444	96.1111	98.3333	96.6667	98.3333	97.7778	99.4444	96.1111
	IBO group
			Day
			1	2	3	4	5	6	7	8	9	10	11	12	13	14
	animal ID	#1	48.6034	59.4444	68.8889	71.6667	78.8889	91.1111	90	96.6667	92.7778	95.5556	96.6667	98.3333	99.4444	97.7778
		#2	52.2472	52.7778	48.3333	57.2222	62.2222	70	67.2222	71.1111	71.6667	86.6667	90.5556	93.8889	96.6667	87.2222
		#3	63.6872	50	51.3966	52.2222	51.1111	50.5556	50.5556	55.5556	73.0337	95	94.9721	95	98.3333	96.6667
		#4	45.2514	47.2222	55	56.6667	65.3631	64.4444	72.7778	86.1111	91.6201	90.5556	93.2961	93.3333	97.7778	98.8889
		#5	55.8659	57.5419	57.2222	62.7778	62.7778	65.5556	81.1111	84.4444	82.2222	86.6667	84.4444	85.4749	91.6667	89.4444
		#6	53.6723	56.7416	69.1011	64.4444	71.3483	72.6257	64.4444	77.5281	79.7753	75	83.2402	83.3333	88.8889	90

## Sheet: Fig. 3J
Fig. 3J	Data	Changes in the proportion of the WSW or LSL strategy through the discrimination learning in the groups treated into the aDLS
	Subjects	n = 8 (PBS group) or 8 (IBO group)
	Softwear	SPSS ver. 27
	Dependent variable	Proportion of the WSW (%)																		Dependent variable	Proportion of the LSL (%)
	Stats	two-way ANOVA, day as repeated measure; day effect, F(3.048058,42.672818) = 54.777462, p = 0.0000000000000090573 group effect, F(1,14) = 13.451070, p = 0.002535 day x group interaction, F(3.048058,42.672818) = 3.288237, p = 0.029000 adjusted by Greenhouse-Geisser ε 0.234466 Simple main effect analysis (PBS vs. IBO); day 1, p = 0.728199 day 2, p = 0.224941 day 3, p = 0.165426 day 4, p = 0.043695 d…																		Stats	two-way ANOVA, day as repeated measure; day effect, F(3.865617,54.118635) = 14.578355, p = 0.000000052119 group effect, F(1,14) = 5.039375, p = 0.041454 day x group interaction, F(3.865617,54.118635) = 2.471046, p = 0.057211 adjusted by Greenhouse-Geisser ε 0.297355
	PBS group																			PBS group
			Day																			Day
			1	2	3	4	5	6	7	8	9	10	11	12	13	14						1	2	3	4	5	6	7	8	9	10	11	12	13	14
	animal ID	#1	14.6067	27.933	39.1061	37.4302	49.162	57.5419	62.5698	64.8045	73.743	63.1285	71.5084	70.9497	74.8603	70.9497				animal ID	#1	3.37079	8.37989	6.14525	8.93855	3.91061	1.11732	0.558659	0.558659	0.558659	1.11732	0	0	0	0
		#2	34.2697	28.4916	30.7263	25.1397	43.0168	53.6313	50.838	63.6872	71.5084	59.2179	68.7151	72.067	73.1844	73.1844					#2	8.98876	6.14525	10.0559	6.14525	0	2.23464	2.7933	0	0.558659	1.67598	0	0	0	0
		#3	20.8092	22.0339	20.339	52.514	54.7486	62.5698	59.2179	65.3631	70.9497	65.3631	64.2458	62.0112	65.9218	64.2458					#3	13.2948	14.6893	9.03955	2.23464	1.67598	1.67598	1.67598	1.11732	1.67598	1.11732	1.11732	0.558659	0.558659	1.11732
		#4	19.1011	16.7598	10.6145	15.6425	20.1117	30.1676	42.4581	50.2793	54.7486	58.6592	55.3073	57.5419	58.1006	68.7151					#4	12.9213	12.8492	15.0838	21.2291	15.6425	9.49721	5.58659	2.23464	2.23464	1.67598	2.7933	1.11732	1.11732	0.558659
		#5	7.38636	1.67598	1.11732	16.7598	18.4358	47.486	64.2458	62.0112	59.7765	62.0112	71.5084	62.5698	64.8045	60.3352					#5	21.5909	3.35196	6.70391	10.0559	0	2.23464	1.67598	0	1.11732	0	0.558659	0	0.558659	0.558659
		#6	10.2273	22.3464	12.8492	26.8156	46.9274	62.0112	54.7486	64.8045	67.0391	73.743	66.4804	73.1844	65.9218	67.5978					#6	0.568182	10.0559	11.7318	7.82123	2.23464	0.558659	0.558659	2.23464	0.558659	0	0	0.558659	1.67598	0
		#7	14.6067	26.8156	26.8156	48.6034	53.6313	50.838	60.8939	65.9218	59.7765	60.3352	68.7151	70.3911	74.3017	70.2857					#7	12.3596	11.1732	10.0559	2.23464	2.23464	1.11732	1.67598	0	0.558659	0.558659	0	0	0	0
		#8	17.9775	17.8771	39.1061	62.0112	68.1564	61.4525	67.0391	67.5978	69.2737	72.067	67.0391	68.1564	72.6257	73.1844					#8	9.55056	11.7318	5.02793	1.11732	0	1.67598	0	1.67598	0.558659	1.67598	1.11732	2.23464	0	0
	IBO group																			IBO group
			Day																			Day
			1	2	3	4	5	6	7	8	9	10	11	12	13	14						1	2	3	4	5	6	7	8	9	10	11	12	13	14
	animal ID	#1	17.341	18.4358	12.4294	10.6145	11.1732	15.0838	30.5085	40.7821	36.8715	51.9553	63.8418	60.9195	68.7861	67.8363				animal ID	#1	17.341	17.8771	22.5989	22.3464	17.8771	16.7598	11.8644	3.35196	5.58659	1.67598	1.69492	0.574713	0	1.16959
		#2	13.4831	2.7933	1.11732	5.58659	9.49721	24.2938	41.8994	45.8101	58.1006	59.7765	51.3966	67.0391	67.5978	66.4804					#2	15.7303	6.14525	2.23464	2.23464	6.14525	6.21469	5.02793	1.11732	1.11732	2.7933	2.23464	0	0	0
		#3	15.7303	13.4078	9.49721	14.1243	24.0223	22.3464	24.581	21.2291	35.7542	56.9832	58.6592	59.7765	66.4804	66.4804					#3	17.4157	18.9944	6.70391	11.2994	13.9665	17.3184	16.2011	14.5251	5.02793	3.35196	1.67598	2.23464	0	1.11732
		#4	17.9775	13.9665	21.2291	29.6089	24.0223	17.8771	14.5251	12.8492	17.3184	18.4358	16.7598	18.4358	39.6648	46.3687					#4	24.1573	15.6425	20.1117	7.26257	11.1732	18.4358	16.7598	20.6704	11.1732	16.7598	20.6704	12.2905	6.14525	3.91061
		#5	28.0899	34.6369	25.6983	36.3128	29.0503	16.7598	31.8436	33.5196	45.2514	62.5698	68.1564	64.2458	67.5978	67.0391					#5	12.9213	9.49721	6.14525	10.0559	10.0559	17.8771	5.58659	8.93855	4.46927	2.7933	3.35196	0.558659	0.558659	0
		#6	14.0449	7.26257	14.5251	18.4358	23.4637	29.6089	48.0447	54.8023	63.1285	67.5978	61.4525	66.4804	70.3911	69.8324					#6	5.05618	0.558659	0.558659	8.93855	5.58659	6.70391	3.91061	0.564972	0.558659	0	0.558659	0.558659	0	0
		#7	11.7978	8.57143	21.7877	30.5085	50.8475	48	62.1469	56	58.2857	60.3352	66.1017	64.2458	73.1844	58.1006					#7	6.17978	1.14286	0	0.564972	1.12994	2.28571	2.25989	1.71429	0	1.11732	0	0.558659	1.11732	2.23464
		#8	10.6742	17.8771	7.82123	10.0559	10.0559	25.1397	21.2291	20.1117	10.0559	18.4358	22.0339	15.2047	32.9609	56.4246					#8	25.2809	20.1117	6.14525	8.93855	15.6425	10.0559	9.49721	12.8492	19.5531	13.9665	15.8192	15.7895	10.6145	2.7933

## Sheet: Fig. 3K
Fig. 3K	Data	Changes in the proportion of the WSW or LSL strategy through the discrimination learning in the groups treated into the pVLS
	Subjects	n = 8 (PBS group) or 8 (IBO group)
	Softwear	SPSS ver. 27
	Dependent variable	Proportion of the WSW (%)																		Dependent variable	Proportion of the LSL (%)
	Stats	two-way ANOVA, day as repeated measure; day effect, F(3.205755,44.880570) = 47.168076, p = 0.000000000000027352 group effect, F(1,14) = 9.250525, p = 0.008797 day x group interaction, F(3.205755,44.880570) = 1.861645, p = 0.146269 adjusted by Greenhouse-Geisser ε 0.246597																		Stats	two-way ANOVA, day as repeated measure; day effect, F(4.772516,66.815231) = 24.018264, p = 0.00000000000019166 group effect, F(1,14) = 0.762310, p = 0.397335 day x group interaction, F(4.772516,66.815231) = 1.338114, p = 0.260494 adjusted by Greenhouse-Geisser ε 0.367117
	PBS group																			PBS group
			Day																			Day
			1	2	3	4	5	6	7	8	9	10	11	12	13	14						1	2	3	4	5	6	7	8	9	10	11	12	13	14
	animal ID	#1	15.7303	29.7753	21.2291	20.6704	26.257	17.8771	35.1955	51.3966	56.9832	54.1899	66.4804	60.8939	66.4804	69.2737				animal ID	#1	17.4157	7.30337	15.0838	19.5531	20.6704	18.4358	8.93855	2.23464	1.11732	3.91061	1.11732	1.67598	0	0.558659
		#2	11.7978	7.26257	39.1061	36.3128	41.8994	63.6872	65.9218	68.7151	55.8659	70.3911	71.5084	71.5084	75.419	70.9497					#2	16.8539	3.35196	3.91061	4.46927	3.35196	0.558659	0	0.558659	1.67598	0	0	0	0	0.558659
		#3	27.2727	7.82123	17.3184	18.9944	25.1397	59.2179	69.2737	70.3911	70.9497	74.3017	74.8603	77.095	72.067	74.8603					#3	18.1818	13.4078	12.2905	17.3184	13.4078	0.558659	0	0.558659	0	0	0.558659	0	0	0
		#4	4.49438	0	17.8771	27.3743	54.7486	66.4804	70.9497	70.9497	76.5363	65.3631	71.5084	70.3911	77.095	73.743					#4	3.37079	0	6.14525	8.93855	1.67598	1.11732	0	0	0	0.558659	0.558659	0	0.558659	0
		#5	12.3596	16.7598	44.6927	53.0726	63.6872	54.7486	63.1285	64.2458	72.067	56.9832	57.6271	68.1564	70.3911	72.067					#5	15.7303	18.4358	2.23464	0.558659	1.11732	1.67598	0.558659	0	0	1.11732	1.69492	0.558659	0.558659	0
		#6	10.6742	14.5251	13.5593	17.3184	8.37989	8.93855	16.2011	31.2849	22.3464	18.9944	24.581	47.486	52.514	59.7765					#6	23.0337	22.3464	11.8644	18.9944	12.2905	3.35196	15.0838	8.37989	6.14525	7.82123	12.8492	3.35196	2.23464	2.7933
		#7	5.05618	17.3184	12.8492	17.3184	19.5531	54.1899	67.0391	72.067	65.9218	70.9497	71.5084	66.4804	67.5978	73.743					#7	5.61798	15.6425	18.9944	17.8771	15.6425	2.23464	1.11732	0	0.558659	1.11732	0	0	0.558659	0
		#8	15.1685	25.6983	21.2291	32.4022	29.0503	35.1955	34.6369	59.7765	66.4804	64.2458	67.5978	71.5084	70.9497	72.6257					#8	19.6629	13.4078	10.0559	7.82123	9.49721	6.70391	7.82123	2.23464	0	0	0	0.558659	0	0
	IBO group																			IBO group
			Day																			Day
			1	2	3	4	5	6	7	8	9	10	11	12	13	14						1	2	3	4	5	6	7	8	9	10	11	12	13	14
	animal ID	#1	5.05618	1.67598	5.64972	13.4078	28.4916	47.486	46.9274	58.1006	59.2179	59.2179	62.0112	69.8324	63.1285	65.3631				animal ID	#1	12.9213	0.558659	3.9548	6.70391	8.37989	3.91061	2.7933	2.7933	1.67598	1.11732	1.11732	0	0	1.67598
		#2	13.4831	17.3184	12.2905	10.7345	13.4078	20.904	29.0503	19.774	18.6441	23.1638	36.3128	60.3352	63.1285	56.9832					#2	18.5393	10.0559	3.91061	6.77966	10.6145	12.4294	11.7318	11.8644	5.64972	7.9096	5.02793	0.558659	1.67598	0
		#3	15.1685	6.14525	3.91061	11.1732	7.82123	25.6983	33.5196	55.8659	54.1899	57.5419	59.2179	60.8939	65.9218	56.9832					#3	19.6629	10.0559	3.91061	6.70391	3.91061	1.67598	2.23464	1.67598	2.23464	1.67598	1.67598	1.11732	0.558659	0.558659
		#4	19.6629	14.5251	18.4358	31.2849	23.4637	36.3128	51.9553	58.6592	61.4525	65.3631	68.1564	72.067	70.9497	73.743					#4	19.1011	14.5251	9.49721	10.6145	12.8492	8.37989	3.91061	0.558659	1.11732	0	0.558659	0	0.558659	0.558659
		#5	5.84416	9.94152	5.95238	11.5607	13.1429	5.02793	25.6983	38.5475	50.2825	30.1676	47.486	50.838	51.9553	59.7765					#5	27.2727	13.4503	8.33333	4.62428	11.4286	5.58659	4.46927	3.91061	2.25989	6.70391	1.11732	2.23464	1.11732	1.67598
		#6	9.55056	3.35196	6.14525	3.35196	1.67598	0.558659	5.02793	8.37989	0	3.91061	30.7263	30.1676	45.2514	60.8939					#6	12.3596	6.70391	13.4078	13.4078	1.67598	0.558659	0	2.7933	2.23464	1.11732	2.7933	2.23464	1.11732	1.11732
		#7	13.0682	15.8192	11.5607	10.6509	10.6742	16.7598	23.7288	22.3464	15.0838	22.3464	15.8192	24.0223	24.0223	17.8771					#7	18.1818	15.2542	13.2948	5.91716	8.42697	10.6145	11.2994	7.82123	15.6425	13.9665	15.8192	9.49721	7.82123	11.7318
		#8	18.1818	19.5531	25.6983	16.2011	27.933	25.6983	23.4637	22.905	38.5475	32.4022	55.3073	50.838	51.9553	53.6313					#8	23.2955	16.2011	13.4078	16.7598	7.26257	10.0559	11.1732	13.4078	6.14525	8.37989	1.67598	2.23464	1.11732	3.91061

## Sheet: Fig. 3L
Fig. 3L	Data	Changes in the proportion of the WSW or LSL strategy through the discrimination learning in the groups treated into the DMS
	Subjects	n = 7 (PBS group) or 6 (IBO group)
	Softwear	SPSS ver. 27
	Dependent variable	Proportion of the WSW (%)																		Dependent variable	Proportion of the LSL (%)
	Stats	two-way ANOVA, day as repeated measure; day effect, F(3.051644,33.568087) = 48.424491, p = 0.0000000000023269 group effect, F(1,11) = 0.702622, p = 0.419745 day x group interaction, F(3.051644,33.568087) = 0.845974, p = 0.480153 adjusted by Greenhouse-Geisser ε 0.234742																		Stats	two-way ANOVA, day as repeated measure; day effect, F(3.442354,37.865898) = 13.786699, p = 0.000001 group effect, F(1,11) = 0.002001, p = 0.965124 day x group interaction, F(3.442354,37.865898) = 0.580663, p = 0.653930 adjusted by Greenhouse-Geisser ε 0.264796
	PBS group																			PBS group
			Day																			Day
			1	2	3	4	5	6	7	8	9	10	11	12	13	14						1	2	3	4	5	6	7	8	9	10	11	12	13	14
	animal ID	#1	8.98876	7.82123	38.5475	51.3966	48.0447	60.8939	72.067	64.2458	67.2316	65.9218	63.6872	62.0112	74.3017	66.4804				animal ID	#1	14.0449	12.2905	4.46927	7.26257	1.11732	2.23464	0	3.35196	1.12994	0.558659	0.558659	0.558659	0	0.558659
		#2	10.1124	13.9665	16.7598	21.7877	42.2857	56.4246	59.2179	63.6872	68.1564	70.9497	69.2737	69.8324	72.067	71.5084					#2	20.7865	18.4358	17.8771	12.2905	3.42857	2.7933	3.35196	1.11732	0	0.558659	0.558659	0.558659	1.67598	0.558659
		#3	7.30337	20.6704	24.581	34.6369	32.4022	44.1341	61.4525	65.9218	70.3911	67.0391	73.743	70.3911	72.6257	72.067					#3	2.80899	2.7933	7.82123	7.26257	11.1732	3.35196	1.67598	1.67598	0.558659	0	0.558659	0	0.558659	0
		#4	20.4545	5.78035	6.77966	8.93855	14.2857	17.5141	11.7318	15.6425	12.8492	24.581	32.4022	58.1006	63.1285	64.9718					#4	15.3409	8.67052	10.7345	7.82123	8	12.4294	21.7877	16.2011	21.2291	15.0838	6.14525	3.35196	0	1.69492
		#5	18.5393	15.0838	16.7598	35.1955	32.4022	37.4302	47.486	40.7821	46.9274	54.1899	61.4525	58.1006	64.8045	67.5978					#5	16.2921	13.9665	15.0838	11.7318	10.6145	7.26257	2.23464	6.14525	3.35196	1.67598	0.558659	1.67598	0.558659	0
		#6	31.4607	34.0782	30.1676	39.1061	56.4246	60.8939	69.8324	74.8603	64.8045	68.1564	70.3911	70.3911	74.3017	74.3017					#6	10.1124	5.02793	9.49721	10.0559	1.67598	2.23464	0	0.558659	0.558659	0	0	0	0	0
		#7	25	10.6145	8.37989	13.9665	13.9665	28.4916	62.5698	69.8324	71.5084	75.419	72.067	73.1844	72.6257	73.743					#7	0	22.3464	6.70391	24.581	6.14525	4.46927	0	0	0	0	0	0.558659	0	0
	IBO group																			IBO group
			Day																			Day
			1	2	3	4	5	6	7	8	9	10	11	12	13	14						1	2	3	4	5	6	7	8	9	10	11	12	13	14
	animal ID	#1	6.17978	14.5251	32.4022	37.9888	48.0447	64.8045	56.4246	65.3631	68.1564	67.0391	68.7151	71.5084	74.8603	74.3017				animal ID	#1	8.42697	0.558659	5.58659	5.58659	3.91061	1.11732	1.67598	0.558659	1.11732	0	0	0	0	0
		#2	11.9318	9.49721	9.49721	19.5531	29.6089	34.6369	33.5196	32.9609	34.0782	53.0726	59.7765	63.6872	71.5084	58.1006					#2	9.09091	6.14525	13.4078	8.37989	11.1732	5.02793	6.70391	3.35196	2.7933	0.558659	0.558659	0.558659	0	2.23464
		#3	25.2809	20.6704	19.774	24.0223	18.4358	16.2011	11.1732	21.2291	38.8571	68.1564	67.2316	68.7151	75.419	72.6257					#3	4.49438	18.9944	18.6441	18.9944	17.3184	13.9665	10.0559	10.0559	4	0	0	0	0	1.11732
		#4	6.74157	6.14525	13.4078	16.7598	32.7684	33.5196	45.2514	56.9832	67.7966	64.2458	63.2768	64.8045	78.2123	67.5978					#4	14.0449	9.49721	9.49721	6.14525	8.47458	10.6145	7.82123	2.23464	0.564972	0.558659	0.564972	0.558659	0	0
		#5	23.0337	24.2938	20.6704	27.933	28.4916	34.6369	46.3687	55.3073	50.2793	58.1006	53.6313	57.6271	65.9218	60.3352					#5	12.3596	8.47458	12.2905	7.82123	11.1732	8.93855	2.7933	2.7933	2.23464	2.23464	0.558659	2.82486	1.11732	1.67598
		#6	18.8571	22.8571	37.7143	30.7263	38.2857	37.2881	30.1676	44.5714	45.7143	39.6648	49.7175	54.7486	60.8939	59.2179					#6	13.1429	15.4286	9.14286	7.82123	4.57143	3.9548	7.82123	3.42857	4.57143	5.58659	1.69492	3.91061	1.11732	1.67598
