# Supplementary material for: Acquisition of auditory discrimination mediated by different processes through two distinct circuits linked to the lateral striatum
Source: eLife. 2025 Jul 11;13:RP97326. doi: 10.7554/eLife.97326 (PMC12252547; doi:10.7554/eLife.97326)
Supplement: Figure 4—figure supplement 1—source data 1. [file elife-97326-fig4-figsupp1-data1.xlsx]

## Sheet: Figure 4–figure supplement 1A
Figure 4–figure supplement 1A	Data	Number of single lever presses in group injected with SAL or different doses of MUS into the aDLS
	Subjects	n = 3 (SAL group) or 3 (MUS group)
	Softwear	SPSS ver. 27
	Dependent variable	Number of lever presses
	Stats	one-way ANOVA, condition as repeated measure; condition, F(3,6) = 4.315152, p = 0.060626
			SAL	0.1 µg/ul	0.2 µg/ul	0.5 µg/ul
	animal ID	#1	30	30	15	30
		#2	30	30	19	30
		#3	30	30	29	29

## Sheet: Figure 4–figure supplement 1B
Figure 4–figure supplement 1B	Data	Number of single lever presses in group injected with SAL or different doses of MUS into the pVLS
	Subjects	n = 3 (SAL group) or 3 (MUS group)
	Softwear	SPSS ver. 27
	Dependent variable	Number of lever presses
	Stats	one-way ANOVA, condition as repeated measure; condition, F(3,6) = 27.236025, p = 0.000682
			SAL	0.1 µg/ul	0.2 µg/ul	0.5 µg/ul
	animal ID	#1	29	25	0	2
		#2	29	26	0	3
		#3	30	30	17	15

## Sheet: Figure 4–figure supplement 1C
Figure 4–figure supplement 1C	Data	Amount of food intake for 60 min after the SAL and MUS injections into the aDLS
	Subjects	n = 3 (SAL group) or 3 (MUS group)
	Softwear	SPSS ver. 27
	Dependent variable	Amount of food intake (g)
	Stats	paired Student’s t-test; CE2, t(2) = 1.449681, p = 0.284191
			SAL	0.1 µg/ul
	animal ID	#1	24	21
		#2	22.1	22.3
		#3	33.8	24.6

## Sheet: Figure 4–figure supplement 1D
Figure 4–figure supplement 1D	Data	Amount of food intake for 60 min after the SAL and MUS injections into the pVLS
	Subjects	n = 3 (SAL group) or 3 (MUS group)
	Softwear	SPSS ver. 27
	Dependent variable	Amount of food intake (g)
	Stats	paired Student’s t-test; CE2, t(2) = 0.725687, p = 0.543459
			SAL	0.1 µg/ul
	animal ID	#1	16.7	21.1
		#2	23.8	21.5
		#3	34.1	20.7
