# Supplementary material for: Acquisition of auditory discrimination mediated by different processes through two distinct circuits linked to the lateral striatum
Source: eLife. 2025 Jul 11;13:RP97326. doi: 10.7554/eLife.97326 (PMC12252547; doi:10.7554/eLife.97326)
Supplement: Figure 4—figure supplement 2—source data 1. [file elife-97326-fig4-figsupp2-data1.xlsx]

## Sheet: Figure 4–figure supplement 2A
Figure 4–figure supplement 2A	Data	Success rate on day N-1 of rats used for the injection into the aDLS
	Subjects	n = 8 (SAL group) or 8 (MUS group)
	Softwear	SPSS ver. 27
	Dependent variable	Success rate (%)
	Stats	unpaired Student’s t-test; early, t(10.437) = 0.800343, p = 0.441349 middle, t(14) = 1.064129, p = 0.305281 late, t(14) = 0.118354, p = 0.907469
				Stage
				Early	Middle	Late
	animal ID	SAL	#1	57.3034	69.4444	81.6667
			#2	51.6854	60.5556	85.5556
			#3	42.0455	80	81.1111
			#4	48.3146	53.3333	81.6667
			#5	54.5455	62.2222	75.5102
			#6	38.2022	60	90
			#7	56.1798	65.5556	83.8889
			#8	43.8202	64.4444	91.1111
		MUS	#1	44.9438	72.2222	83.3333
			#2	49.4382	60	93.8889
			#3	51.6854	71.1111	84.4444
			#4	42.6966	61.1111	81.5642
			#5	47.191	69.8324	84.7458
			#6	43.1818	77.2222	85.4749
			#7	51.1364	66.6667	72.2222
			#8	43.8202	66.6667	82.2222

## Sheet: Figure 4–figure supplement 2B
Figure 4–figure supplement 2B	Data	Success rate on day N-1 of rats used for the injection into the pVLS
	Subjects	n = 6 (SAL group) or 6 (MUS group)
	Softwear	SPSS ver. 27
	Dependent variable	Success rate (%)
	Stats	unpaired Student’s t-test; early, t(10) = 0.789426, p = 0.448176 middle, t(10) = 1.224445, p = 0.248847 late, t(10) = 0.489494, p = 0.635052
				Stage
				Early	Middle	Late
	animal ID	SAL	#1	50.5618	61.6667	85.5556
			#2	62.9213	66.4804	81.6667
			#3	46.0674	63.3333	81.1111
			#4	56.1798	61.6667	83.3333
			#5	51.6854	68.8889	82.7778
			#6	60.6742	61.6667	88.8889
		MUS	#1	47.191	62.2222	83.3333
			#2	50.5618	62.7778	84.4444
			#3	48.3146	65.5556	82.2222
			#4	63.6364	69.4444	83.3333
			#5	41.3793	65.5556	82.7778
			#6	57.3034	81.1111	93.3333
