# Supplementary material for: Acquisition of auditory discrimination mediated by different processes through two distinct circuits linked to the lateral striatum
Source: eLife. 2025 Jul 11;13:RP97326. doi: 10.7554/eLife.97326 (PMC12252547; doi:10.7554/eLife.97326)
Supplement: Figure 4—figure supplement 3—source data 1. [file elife-97326-fig4-figsupp3-data1.xlsx]

## Sheet: Figure 4–figure supplement 3A
Figure 4–figure supplement 3A	Data	Proportion of the behavioral strategy in the groups used for the aDLS injection
	Subjects	n = 8 (SAL group) or 8 (MUS group)													Subjects	n = 8 (SAL group) or 8 (MUS group)
	Softwear	SPSS ver. 27													Softwear	SPSS ver. 27
	Dependent variable	Subtracted proportion													Dependent variable	Subtracted proportion (%)
	Stats	unpaired Student’s t-test; middle, t(14) = 0.376026, p = 0.712534 late, t(8.478583) = 1.077602, p = 0.310914													Stats	unpaired Student’s t-test; middle, t(14) = 1.083939, p = 0.296707 late, t(14) = 0.229399, p = 0.821876
	WSW strategy														LSL strategy
	Middle						Late								Middle						Late
				Subtracted proportion						Subtracted proportion								Subtracted proportion						Subtracted proportion
	animal ID	SAL	#1	35.1955			animal ID	SAL	#1	52.514					animal ID	SAL	#1	5.02793			animal ID	SAL	#1	2.7933
			#2	24.0223					#2	51.9553							#2	7.82123					#2	1.67598
			#3	45.8101					#3	49.7207							#3	0.558659					#3	2.7933
			#4	29.0503					#4	50.838							#4	7.26257					#4	3.35196
			#5	29.6089					#5	48.6034							#5	7.26257					#5	2.7933
			#6	26.8156					#6	59.2179							#6	12.2905					#6	1.11732
			#7	36.8715					#7	56.4246							#7	11.7318					#7	1.67598
			#8	18.9944					#8	59.2179							#8	12.2905					#8	0
		MUS	#1	39.1061				MUS	#1	55.8659						MUS	#1	5.58659				MUS	#1	2.7933
			#2	31.8182					#2	63.1285							#2	13.6364					#2	0
			#3	16.2791					#3	33.125							#3	0					#3	1.875
			#4	24.0223					#4	50.8475							#4	9.49721					#4	3.38983
			#5	39.548					#5	56.0694							#5	9.60452					#5	1.15607
			#6	44.1341					#6	53.6723							#6	4.46927					#6	0
			#7	37.4302					#7	49.7207							#7	1.67598					#7	0
			#8	27.3743					#8	25							#8	0					#8	9.09091

## Sheet: Figure 4–figure supplement 3B
Figure 4–figure supplement 3B	Data	Proportion of the behavioral strategy in the groups used for the pVLS injection
	Subjects	n = 6 (SAL group) or 6 (MUS group)													Subjects	n = 6 (SAL group) or 6 (MUS group)
	Softwear	SPSS ver. 27													Softwear	SPSS ver. 27
	Dependent variable	Subtracted proportion													Dependent variable	Subtracted proportion (%)
	Stats	unpaired Student’s t-test; middle, t(10) = 0.912024, p = 0.383216 late, t(6.407690) = 0.941755, p = 0.380455													Stats	unpaired Student’s t-test; middle, t(10) = 0.074976, p = 0.941713 late, t(8.266554) = 0.129002, p = 0.900439
	WSW strategy														LSL strategy
	Middle						Late								Middle						Late
				Subtracted proportion						Subtracted proportion								Subtracted proportion						Subtracted proportion
	animal ID	SAL	#1	23.4637			animal ID	SAL	#1	55.3073					animal ID	SAL	#1	7.26257			animal ID	SAL	#1	1.11732
			#2	36.7232					#2	49.162							#2	7.26257					#2	1.11732
			#3	23.4637					#3	53.0726							#3	2.23464					#3	3.91061
			#4	29.6089					#4	50.2793							#4	10.6145					#4	3.35196
			#5	27.3743					#5	56.4246							#5	9.49721					#5	3.35196
			#6	16.7598					#6	60.3352							#6	0					#6	1.11732
		MUS	#1	16.8539				MUS	#1	35.1515						MUS	#1	5.05618				MUS	#1	3.0303
			#2	26.6667					#2	36.7742							#2	12.1212					#2	1.93548
			#3	28.4916					#3	54.1899							#3	2.7933					#3	3.35196
			#4	34.6369					#4	57.5419							#4	7.26257					#4	2.7933
			#5	29.6089					#5	53.0726							#5	6.70391					#5	2.23464
			#6	49.7207					#6	60.8939							#6	3.91061					#6	1.11732
