# Supplementary material for: Acquisition of auditory discrimination mediated by different processes through two distinct circuits linked to the lateral striatum
Source: eLife. 2025 Jul 11;13:RP97326. doi: 10.7554/eLife.97326 (PMC12252547; doi:10.7554/eLife.97326)
Supplement: Figure 4—source data 1. [file elife-97326-fig4-data1.xlsx]

## Sheet: Fig. 4C
Fig. 4C	Data	Effects of transient aDLS inhibition on the performance
	Subjects	n = 8 (SAL group) or 8 (MUS group)
	Softwear	SPSS ver. 27
	Dependent variable	Success rate (%)									Dependent variable	Subtracted rate
	Stats	two-way ANOVA, stage as repeated measure; stage effect, F(2,28) =28.707942, p = 0.00000016545 group effect, F(1,14) = 8.839817, p = 0.010073 stage x group interaction, F(2,28) = 0.757278, p = 0.478305 Unpaired Student's t-test; early : t(14) = 0.557888, p = 0.585732 middle: t(14) = 2.764301, p = 0.015212 Welch’s t-test (Data were unequal variance); late: t(12.010) = 1.617150, p = 0.131793 the Bon…									Stats	two-way ANOVA, stage as repeated measure; stage effect, F(2,28) = 1.231078, p = 0.307301 group effect, F(1,14) = 10.796521, p = 0.005413 stage x group interaction, F(2,28) = 2.359502, p = 0.112983 Unpaired Student's t-test; early: t(14) = 0.285111, p = 0.779733 late : t(14) =1.270644, p = 0.224565 Welch’s t-test (Data were unequal variance); middle: t(9.603235) = 3.331389, p = 0.008029 the Bonfer…
				Stage										Stage
				early	middle	late								early	middle	late
	animal ID	SAL	#1	55.5556	57.7778	80					animal ID	SAL	#1	-1.74782	-11.6667	-1.66667
			#2	50	73.3333	77.7778							#2	-1.68539	12.7778	-7.77778
			#3	52.2727	60	75.5556							#3	10.2273	-20	-5.55556
			#4	51.1111	65.5556	80							#4	2.7965	12.2222	-1.66667
			#5	55.5556	82.2222	85.5556							#5	1.0101	20	10.0454
			#6	36.3636	64.4444	82.2222							#6	-1.83861	4.44444	-7.77778
			#7	64.4444	75.5556	84.4444							#7	8.26467	10	0.555556
			#8	35.5556	62.2222	97.7778							#8	-8.26467	-2.22222	6.66667
		MUS	#1	37.7778	64.4444	86.6667						MUS	#1	-7.16604	-7.77778	3.33333
			#2	60	37.7778	86.6667							#2	10.5618	-22.2222	-7.22222
			#3	71.1111	53.3333	71.1111							#3	19.4257	-17.7778	-13.3333
			#4	15.3846	43.4783	86.6667							#4	-27.312	-17.6329	5.10242
			#5	37.2093	58.8235	61.3636							#5	-9.98171	-11.0089	-23.3821
			#6	48.8372	72.7273	68.8889							#6	5.65539	-4.49495	-16.586
			#7	51.1111	48.8889	64.4444							#7	-0.0252525	-17.7778	2.77778
			#8	48.8889	51.1111	80							#8	5.06866	-15.5556	-2.22222

## Sheet: Fig. 4D
Fig. 4D	Data	Effects of transient aVLS inhibition on the performance
	Subjects	n = 6 (SAL group) or 6 (MUS group)
	Softwear	SPSS ver. 27
	Dependent variable	Success rate (%)									Dependent variable	Subtracted rate
	Stats	two-way ANOVA, time as repeated measure; stage effect, F(2,20) = 17.641676, p = 0.000038 group effect, F(1,10) = 43.942315, p = 0.000059 stage x group interaction, F(2,20) = 4.729, p = 0.011656 Simple main effect analysis; early: p = 0.054791 middle: p = 0.109287 late: p = 0.000042 Adjusted by the Bonferroni correction									two-way ANOVA, time as repeated measure; stage effect, F(2,20) = 12.105338, p = 0.000359 group effect, F(1,10) = 16.310079, p = 0.002367 stage x group interaction, F(2,20) = 8.500338, p = 0.002129 Simple main effect analysis; early : p = 0.594670 middle : p = 0.085034 late : p = 0.000003
				Stage										Stage
				early	middle	late								early	middle	late
	animal ID	SAL	#1	48.8889	64.4444	84.4444					animal ID	SAL	#1	-1.67291	2.77778	-1.11111
			#2	60	53.3333	80							#2	-2.92135	-13.1471	-1.66667
			#3	48.8889	64.4444	75.5556							#3	2.82147	1.11111	-5.55556
			#4	55.5556	64.4444	82.2222							#4	-0.62422	2.77778	-1.11111
			#5	60	58.8889	77.7778							#5	8.31461	-10	-5
			#6	55.5556	80	91.1111							#6	-5.1186	18.3333	2.22222
		MUS	#1	44.4444	57.7778	48.8889						MUS	#1	-2.74657	-4.44444	-34.4444
			#2	52.5	45.4545	53.3333							#2	1.9382	-17.3232	-31.1111
			#3	44.186	65.9091	62.2222							#3	-4.12856	0.353535	-20
			#4	59.0909	50	46.6667							#4	-4.54545	-19.4444	-36.6667
			#5	41.3793	62.2222	60							#5	13.3826	-3.33333	-22.7778
			#6	38.8889	53.6585	64.4444							#6	-18.4145	-27.4526	-28.8889

## Sheet: Fig. 4E
Fig. 4E	Data	Subtracted proportion of the WSW or LSL strategy in the groups injected into the aDLS at the middle stage
	Subjects	n = 8 (SAL group) or 8 (MUS group)
	Softwear	SPSS ver. 27
	Dependent variable	Subtracted proportion
	Stats	Unpaired Student's t-test; WSW: t(14) = 2.038320, p = 0.060870 LSL: t(14) = 2.714360, p = 0.016778
	WSW strategy						LSL strategy
				Subtracted proportion						Subtracted proportion
	animal ID	SAL	#1	-14.741			animal ID	SAL	#1	8.60843
			#2	23.7049					#2	-5.5485
			#3	-23.0828					#3	8.53225
			#4	2.7679					#4	-2.71712
			#5	-4.60894					#5	-0.444388
			#6	5.00254					#6	-7.74505
			#7	-2.7806					#7	-7.18639
			#8	10.0559					#8	-5.02793
		MUS	#1	-0.469782				MUS	#1	3.50432
			#2	-25					#2	13.6364
			#3	2.32558					#3	13.9535
			#4	-9.73663					#4	11.9314
			#5	-28.0096					#5	-1.91221
			#6	-10.8007					#6	0.292631
			#7	-14.7029					#7	16.5058
			#8	-22.8288					#8	4.54545

## Sheet: Fig. 4F
Fig. 4F	Data	Subtracted proportion of the WSW or LSL strategy in the groups injected into the aDLS at the late stages
	Subjects	n = 8 (SAL group) or 8 (MUS group)
	Softwear	SPSS ver. 27
	Dependent variable	Subtracted proportion
	Stats	Unpaired Student's t-test; WSW: t(14) = 0.897963, p = 0.384389 LSL: t(14) = 0.226193, p = 0.824320
	WSW strategy						LSL strategy
				Subtracted proportion						Subtracted proportion
	animal ID	SAL	#1	-2.51397			animal ID	SAL	#1	-2.7933
			#2	-1.95531					#2	2.86948
			#3	-4.26612					#3	-0.520569
			#4	-0.837989					#4	-3.35196
			#5	-2.77002					#5	1.37337
			#6	-11.4906					#6	1.15541
			#7	-6.42458					#7	-1.67598
			#8	18.0549					#8	0
		MUS	#1	0.95226				MUS	#1	-2.7933
			#2	-1.76486					#2	0
			#3	-4.17763					#3	6.01974
			#4	-0.847458					#4	-3.38983
			#5	-39.4027					#5	-1.15607
			#6	-21.8541					#6	2.27273
			#7	-20.1752					#7	9.09091
			#8	22.7273					#8	-9.09091

## Sheet: Fig. 4G
Fig. 4G	Data	Subtracted proportion of the WSW or LSL strategy in the groups injected into the pVLS at the middle stage
	Subjects	n = 6 (SLA group) or 6 (MUS group)
	Softwear	SPSS ver. 27
	Dependent variable	Subtracted proportion
	Stats	Unpaired Student's t-test; Win-Shift Correct : t(10) = 1.924338, p = 0.083210 Welch’s t-test (Data were unequal variance); Lose-Shift Error : t(6.094637) = 1.364357, p = 0.220685
	WSW strategy						LSL strategy
				Subtracted proportion						Subtracted proportion
	animal ID	SAL	#1	1.53631			animal ID	SAL	#1	-4.98984
			#2	-13.9959					#2	-4.98984
			#3	-3.00914					#3	-2.23464
			#4	4.48197					#4	-1.52362
			#5	2.17115					#5	-2.67902
			#6	33.2402					#6	0
		MUS	#1	-7.76302				MUS	#1	-2.78345
			#2	-8.71795					#2	8.39161
			#3	-2.30114					#3	-2.7933
			#4	-34.6369					#4	-7.26257
			#5	4.48197					#5	4.65973
			#6	-36.2072					#6	4.19749

## Sheet: Fig. 4H
Fig. 4H	Data	Subtracted proportion of the WSW or LSL strategy in the groups injected into the pVLS at the late stage
	Subjects	n = 6 (SLA group) or 6 (MUS group)
	Softwear	SPSS ver. 27
	Dependent variable	Subtracted proportion
	Stats	Unpaired Student's t-test; WSW: t(10) = 3.629021, p = 0.004620 LSL: t(10) = 1.577131, p = 0.145844
	WSW strategy						LSL strategy
				Subtracted proportion						Subtracted proportion
	animal ID	SAL	#1	-3.03454			animal ID	SAL	#1	-1.11732
			#2	-5.98019					#2	-1.11732
			#3	-3.07263					#3	7.45302
			#4	-2.55206					#4	1.1935
			#5	-6.42458					#5	-1.07923
			#6	-10.3352					#6	-1.11732
		MUS	#1	-35.1515				MUS	#1	-3.0303
			#2	-4.27419					#2	15.5645
			#3	-29.1899					#3	5.73895
			#4	-57.5419					#4	6.29761
			#5	-32.6181					#5	0.0380904
			#6	-26.8029					#6	7.97359
