# Supplementary material for: Acquisition of auditory discrimination mediated by different processes through two distinct circuits linked to the lateral striatum
Source: eLife. 2025 Jul 11;13:RP97326. doi: 10.7554/eLife.97326 (PMC12252547; doi:10.7554/eLife.97326)
Supplement: Figure 5—figure supplement 1—source data 1. [file elife-97326-fig5-figsupp1-data1.xlsx]

## Sheet: Figure 5–figure supplement 1A
Figure 5–figure supplement 1A	Data	Success rates
	Subjects	n = 6
	Softwear	SPSS ver. 27
	Dependent variable	Success rate (%)
	Stats	one-way ANOVA; stage as repeated measure; stage effect, F(2,10) = 213.186085, p = 0.00000000632 early vs. middle; p = 0.002649 early vs. late; p = 0.000057 middle vs. late; p = 0.000049 adjusted by the Bonferroni correction
			Satge
			Early	Middle	Late
	animal ID	#1	51.3327	63.6755	91.8569
		#2	56.1603	60.1913	86.931
		#3	52.7544	62.3539	81.3045
		#4	50	60.7644	88.7037
		#5	52.5383	58.9532	80.9437
		#6	53.1073	63.4095	86.9968

## Sheet: Figure 5–figure supplement 1B
Figure 5–figure supplement 1B	Data	Response time
	Subjects	n = 6
	Softwear	SPSS ver. 27
	Dependent variable	Time (s)
	Stats	one-way ANOVA; stage as repeated measure; stage effect, F(2,10) = 0.379384, p = 0.693725
			Satge
			Early	Middle	Late
	animal ID	#1	2.22646	1.84693	1.54769
		#2	1.70389	1.7332	1.87641
		#3	2.44943	2.76569	2.87857
		#4	1.93436	1.97683	1.43413
		#5	1.47039	1.68493	2.05869
		#6	2.23341	2.71969	2.13453

## Sheet: Figure 5–figure supplement 1C
Figure 5–figure supplement 1C	Data	Omisstion rate
	Subjects	n = 6
	Softwear	SPSS ver. 27
	Dependent variable	Omission rate (%)
	Stats	one-way ANOVA; stage as repeated measure; stage effect, F(2,10) = 0.162971, p = 0.851828
			Satge
			Early	Middle	Late
	animal ID	#1	2.59259	1.66667	2.03704
		#2	1.11111	0.925926	0.925926
		#3	6.2963	4.44444	2.59259
		#4	1.11111	1.48148	0
		#5	1.2963	1.11111	3.88889
		#6	1.11111	4.16667	1.94444

## Sheet: Figure 5–figure supplement 1D
Figure 5–figure supplement 1D	Data	Response bias
	Subjects	n = 6
	Softwear	SPSS ver. 27
	Dependent variable	Response bias
	Stats	one-way ANOVA; stage as repeated measure; stage effect, F(2,10) = 0.600474, p = 0.567187
			Satge
			Early	Middle	Late
	animal ID	#1	0.417455	0.470914	0.525628
		#2	0.428699	0.719488	0.485981
		#3	0.775443	0.525234	0.553403
		#4	0.299435	0.405938	0.431481
		#5	0.409537	0.4101	0.489212
		#6	0.231638	0.313758	0.492857
