# Supplementary material for: Acquisition of auditory discrimination mediated by different processes through two distinct circuits linked to the lateral striatum
Source: eLife. 2025 Jul 11;13:RP97326. doi: 10.7554/eLife.97326 (PMC12252547; doi:10.7554/eLife.97326)
Supplement: Figure 5—figure supplement 2—source data 1. [file elife-97326-fig5-figsupp2-data1.xlsx]

## Sheet: Figure 5–figure supplement 2A
Figure 5–figure supplement 2A	Data	Averaged number of well-isolated neurons for every stage in individual rats
	Subjects	n = 6								Subjects	n = 6
	Softwear	SPSS ver. 27								Softwear	SPSS ver. 27
	Dependent variable	Number of recorded neurons								Dependent variable	Number of recorded neurons
	Stats	one-way ANOVA; stage as repeated measure; stage effect, F(1.045130,5.225652) = 0.098156, p = 0.776997 adjusted by Greenhouse-Geisser ε 0.522565								Stats	one-way ANOVA; stage as repeated measure; stage effect, F(2,10) = 1.854535, p = 0.206519
	aDLS									pVLS
			Satge									Satge
			Early	Middle	Late							Early	Middle	Late
	animal ID	#1	41	31.67	34					animal ID	#1	8.5	4.67	4
		#2	19.67	8.33	10						#2	2	2	3
		#3	16	10.67	7.33						#3	3.33	1.67	2
		#4	21	43	39.67						#4	9	4.67	22.33
		#5	11.67	12.67	14						#5	9	7.33	14
		#6	9	22.5	22.5						#6	18	26.5	28.5

## Sheet: Figure 5–figure supplement 2B
Figure 5–figure supplement 2B	Data	Scatter plots of spike width and firing rate of aDLS and pVLS neurons
	Subjects
	Softwear
	Dependent variable	Firing rate (Hz) and spike width (ms)
	Stats
	aDLS						pVLS
			Firing rate	Spike width					Firing rate	Spike width
	# of neurons	1	0.741369	1.13			# of neurons	1	0.0324738	0.77
		2	0.683158	0.2				2	0.158051	1.055
		3	0.135768	0.965				3	0.278618	1.04
		4	0.256163	1.125				4	0.460679	1.115
		5	4.7049	1.375				5	0.315928	0.935
		6	0.200716	0.995				6	0.217989	1.155
		7	1.17234	1.13				7	0.242862	0.725
		8	4.1639	1.38				8	0.363948	0.855
		9	1.96829	1.29				9	0.241135	0.91
		10	13.4455	0.335				10	0.0620111	0.82
		11	1.22899	1.38				11	0.115213	0.75
		12	0.558273	1.19				12	0.236126	0.765
		13	1.29411	1.14				13	1.45217	1.035
		14	3.38435	1.255				14	1.89108	1.36
		15	5.12308	0.545				15	0.370551	1.09
		16	1.09392	1.365				16	0.906806	1.28
		17	0.563627	1.055				17	0.825358	1.25
		18	7.26428	1.375				18	0.974777	1.05
		19	2.01389	1.33				19	0.216954	1.3
		20	1.74322	1.37				20	0.763894	1.18
		21	0.864355	1.075				21	0.952992	0.97
		22	0.225071	1.025				22	0.0389268	0.835
		23	2.5922	1.245				23	0.19941	1.28
		24	0.396422	1.175				24	0.139605	0.76
		25	1.75445	1.23				25	0.412268	1.255
		26	1.01826	1.045				26	1.66747	1.375
		27	0.792671	1.145				27	1.21115	1.37
		28	0.0424923	1.085				28	0.291419	0.865
		29	1.79055	1.37				29	0.113418	1.07
		30	0.964368	1.25				30	0.886996	1.035
		31	4.62026	1.37				31	0.0664654	0.855
		32	0.797335	1.355				32	0.527574	0.9
		33	1.57843	1.055				33	0.447229	1.01
		34	0.760025	1.215				34	0.096753	0.87
		35	0.405404	1.365				35	0.0920168	1.005
		36	1.60952	1.105				36	0.08542	1.095
		37	1.77759	1.215				37	2.3066	1.085
		38	1.08735	1.375				38	0.456749	1.095
		39	4.95968	0.49				39	2.50671	1.38
		40	0.845355	1.135				40	1.5905	1.15
		41	0.757434	1.22				41	9.69672	0.1
		42	0.48417	0.97				42	2.95065	0.1
		43	2.18645	1.305				43	5.5048	1.385
		44	0.126095	1.03				44	1.03075	1.37
		45	2.41295	1.29				45	0.546042	0.845
		46	0.199182	1.065				46	0.787473	1.375
		47	0.983818	1.06				47	4.30077	1.195
		48	0.335764	1.11				48	0.252344	0.925
		49	0.207007	1.125				49	1.31235	1.345
		50	0.842612	1.365				50	0.414235	1.3
		51	1.73715	1.32				51	2.71624	1.21
		52	0.212876	1.17				52	0.276538	1.045
		53	0.380225	1.17				53	2.03603	1.285
		54	0.866799	1.365				54	1.58609	1.085
		55	1.68096	1.39				55	2.38095	0.935
		56	4.29896	1.37				56	0.216466	0.855
		57	0.355327	1.395				57	2.32954	1.375
		58	1.6918	1.065				58	1.10502	1.19
		59	2.20932	1.215				59	0.153952	0.955
		60	0.841367	1.095				60	0.31102	1.39
		61	0.606261	1.355				61	1.042	1.36
		62	2.18407	1.38				62	0.706298	0.67
		63	0.951273	1.215				63	13.796	0.17
		64	2.84635	1.385				64	1.80495	0.38
		65	1.06456	1.315				65	2.32024	0.1
		66	0.762584	1.205				66	1.96107	0.55
		67	1.7617	1.2				67	1.90931	0.85
		68	1.7071	1.345				68	10.7036	1.075
		69	0.924419	1.375				69	13.6764	0.11
		70	0.560734	0.91				70	4.44726	1.375
		71	1.2127	1.4				71	2.08376	1.36
		72	1.60484	1.375				72	1.77475	0.805
		73	0.846169	1.33				73	6.30995	0.76
		74	1.38752	1.39				74	6.37625	1.375
		75	1.0249	1.245				75	2.45456	1.155
		76	0.545084	0.875				76	19.1599	0.335
		77	0.236173	1.38				77	0.133124	0.865
		78	1.20007	1.315				78	3.98151	0.22
		79	0.909481	1.365				79	1.27795	1.38
		80	1.91962	1.035				80	0.957958	1.38
		81	0.890985	1.405				81	2.82278	1.105
		82	0.400854	0.605				82	16.2001	0.36
		83	0.682377	1.05				83	19.318	0.55
		84	0.780368	1.255				84	28.1456	0.68
		85	4.05105	1.37				85	4.3683	0.985
		86	0.515206	1.135				86	2.40889	0.62
		87	1.82501	1.085				87	2.20965	0.89
		88	0.63685	1.295				88	2.70602	0.58
		89	0.956609	0.73				89	3.40199	0.325
		90	1.60697	1.21				90	4.39007	0.945
		91	1.37027	1.35				91	4.23521	0.75
		92	0.587766	1.07				92	3.21015	0.65
		93	0.183608	0.805				93	11.2387	0.635
		94	0.0754794	1.16				94	0.491134	1.295
		95	0.300864	1.135				95	0.158871	0.745
		96	0.65667	1.24				96	2.59268	0.935
		97	0.584	1.18				97	0.924357	0.93
		98	0.162544	1.15				98	1.04838	1.01
		99	1.61456	1.38				99	0.912057	0.995
		100	0.221348	0.73				100	0.86935	1.36
		101	2.63634	1.39				101	0.280672	1.185
		102	0.52151	1.015				102	0.872596	1.17
		103	1.09743	1.285				103	3.28968	1.375
		104	0.453052	1				104	0.504969	0.905
		105	0.313678	1.02				105	3.87983	0.23
		106	0.498164	1.02				106	0.524611	1.03
		107	1.15378	1.17				107	0.280731	0.89
		108	1.05302	1.165				108	0.636261	0.9
		109	0.341939	1.045				109	0.729292	0.37
		110	2.91894	1.185				110	5.65071	0.375
		111	2.45782	1.36				111	0.137199	0.72
		112	1.59244	1.37				112	0.050254	0.93
		113	0.252417	1.15				113	0.904746	0.665
		114	0.885215	1.085				114	0.197538	1.065
		115	2.38357	1.37				115	0.174237	1.04
		116	1.91788	1.36				116	0.511547	0.86
		117	1.8689	1.27				117	0.21748	1.01
		118	1.82309	1.38				118	0.404769	0.78
		119	0.473765	0.335				119	0.255518	1.03
		120	2.25402	1.385				120	0.31181	1.06
		121	0.76199	1.33				121	0.327997	0.98
		122	0.674399	1.135				122	1.06867	1.045
		123	0.996503	1.12				123	3.20653	1.375
		124	0.302795	0.99				124	5.93462	1.05
		125	0.235566	0.225				125	0.145341	0.785
		126	0.607346	0.16				126	0.054865	0.98
		127	1.45868	1.22				127	3.31984	1.065
		128	0.742506	1.05				128	0.704555	0.99
		129	0.419876	0.975				129	8.62488	1.38
		130	0.479557	1.275				130	0.173966	1.065
		131	1.13281	1.21				131	0.990807	1.205
		132	0.158921	0.265				132	0.264613	0.955
		133	0.1566	1.11				133	0.124043	1.045
		134	0.249453	0.84				134	0.159654	0.94
		135	0.551046	0.97				135	0.752264	1.365
		136	1.67546	1.28				136	0.715119	1.22
		137	0.612651	1.2				137	0.214007	0.91
		138	0.485335	1.14				138	0.113478	0.705
		139	0.181599	0.96				139	3.77256	0.925
		140	0.473907	1.28				140	0.197821	0.87
		141	2.07044	1.385				141	0.227298	0.985
		142	0.389089	0.695				142	0.268745	1.32
		143	1.00656	1.35				143	0.081383	1.385
		144	0.458372	1.325				144	0.300935	0.725
		145	2.23525	1.355				145	0.0764306	0.85
		146	1.40226	1.34				146	1.35462	0.87
		147	0.384625	1.02				147	6.30974	0.8
		148	0.317843	1.385				148	1.17766	0.945
		149	0.977277	1.155				149	3.94518	0.92
		150	0.857461	1.175				150	4.06832	0.91
		151	0.7705	1.08				151	1.66942	1.38
		152	3.47056	1.375				152	0.0841893	0.74
		153	0.634971	0.98				153	0.115059	1.04
		154	0.791392	1.065				154	1.66678	0.785
		155	0.131244	0.96				155	0.0366471	0.8
		156	0.219454	0.33				156	10.6285	1.375
		157	0.437659	1.12				157	0.167883	0.81
		158	0.703718	0.805				158	0.354916	0.82
		159	0.42998	1.045				159	0.592296	1.13
		160	0.477121	1.25				160	2.95339	0.86
		161	0.151779	0.965				161	0.834134	0.23
		162	1.09745	1.06				162	1.29833	1.36
		163	0.734252	1.38				163	0.0340059	0.765
		164	0.437301	1.375				164	1.4436	0.665
		165	1.85313	1.39				165	0.196937	0.945
		166	1.45479	1.035				166	0.309684	0.95
		167	1.9796	1.41				167	0.0513389	0.685
		168	0.133589	0.92				168	0.0567865	0.845
		169	1.18514	1.23				169	0.142131	0.77
		170	1.8108	0.985				170	0.20354	0.805
		171	0.215866	1.14				171	0.0919479	0.75
		172	0.927692	1.39				172	1.17994	0.845
		173	1.00696	1.065				173	0.0605503	0.8
		174	0.619641	1.075				174	1.19977	1.155
		175	1.11684	1.195				175	0.383836	0.785
		176	0.579476	1.085				176	0.0380853	0.72
		177	1.65367	1.215				177	2.16788	1.115
		178	0.303805	1.07				178	2.17068	0.755
		179	1.35889	1.115				179	1.56501	0.845
		180	2.74096	1.38				180	0.974597	0.945
		181	1.97517	1.21				181	7.36976	0.405
		182	1.09154	0.985				182	1.2268	1.27
		183	0.95264	1.375				183	0.870696	1.38
		184	0.926276	1.245				184	12.6096	0.295
		185	1.15223	1.035				185	0.184108	0.855
		186	1.25255	1.145				186	0.0559871	0.82
		187	0.934946	1.365				187	0.287482	0.935
		188	0.62141	0.9				188	0.190953	0.995
		189	0.464642	1.13				189	0.200957	1.04
		190	0.641404	0.88				190	0.544602	1.365
		191	1.51212	1.315				191	0.791242	1.375
		192	1.65916	1.375				192	1.15248	1.13
		193	2.04595	1.39				193	0.608379	1.12
		194	0.111118	0.14				194	6.36249	0.355
		195	0.225597	1.095				195	6.15654	0.295
		196	10.9766	0.365				196	0.058629	1.025
		197	0.113772	1.095				197	2.31277	1.375
		198	0.161998	0.99				198	0.0712516	0.85
		199	2.77506	1.35				199	0.111611	1.21
		200	0.66749	0.98				200	0.105466	1.135
		201	1.08985	1.355				201	0.0667673	0.975
		202	0.625484	1.355				202	0.349615	0.815
		203	0.816018	1.11				203	0.133535	1.225
		204	0.650829	1.235				204	26.148	1.375
		205	1.06699	1.055				205	0.0492202	0.88
		206	12.5939	0.53				206	0.733211	1.105
		207	0.207904	1.02				207	1.75784	1.36
		208	0.916336	1.06				208	0.00984404	1.145
		209	3.41597	1.395				209	0.347766	1.245
		210	0.602265	1.29				210	0.0205367	1.285
		211	3.64177	1.375				211	0.540913	1.38
		212	0.43424	1.355				212	1.75037	1.135
		213	0.598188	1.08				213	0.376765	1.2
		214	1.45426	1.36				214	1.82212	0.84
		215	0.697975	1.085				215	0.637188	0.92
		216	0.448065	1.165				216	0.0131136	1.05
		217	0.481918	0.99				217	0.597679	0.84
		218	1.30768	0.92				218	0.820107	1.03
		219	0.117688	1.245				219	1.46063	0.85
		220	1.27667	1.215				220	0.285955	1.195
		221	0.404818	1.1				221	0.603945	0.98
		222	0.610064	1.35				222	0.0268083	1.07
		223	0.978193	1.185				223	0.944359	0.88
		224	0.755401	1.17				224	0.120216	0.93
		225	1.01134	1.065				225	1.14687	1.22
		226	0.750084	1.135				226	0.229339	0.86
		227	0.857492	0.945				227	1.73944	0.855
		228	1.09588	1.21				228	0.226787	1.05
		229	0.998753	1.04				229	0.436901	1.065
		230	0.522329	0.99				230	0.30794	1.045
		231	0.168472	1.15				231	0.481306	0.775
		232	2.05837	1.275				232	31.5556	0.425
		233	0.92389	1.165				233	1.07133	1.375
		234	0.9019	1.115				234	1.92187	1.26
		235	6.71317	0.22				235	1.98186	0.63
		236	0.655282	0.675				236	1.00782	1.02
		237	2.64176	1.375				237	0.571454	0.795
		238	1.96754	1.305				238	0.236075	0.765
		239	1.17761	1.12				239	0.166849	0.69
		240	1.2698	1.375				240	0.858441	1.14
		241	1.75661	1.375				241	0.305974	1.295
		242	1.01557	1.045				242	0.0500565	1.28
		243	1.29027	1.285				243	1.65285	1.39
		244	1.09693	1.39				244	1.74621	1.285
		245	0.917631	1.385				245	0.663907	1.2
		246	3.05195	1.38				246	0.305114	1.02
		247	1.18827	0.92				247	0.23464	0.74
		248	1.37755	1.36				248	1.15459	1.045
		249	0.364346	1.07				249	0.707048	1.4
		250	1.73394	1.185				250	0.0884221	1.19
		251	0.626019	1.36				251	0.0783779	0.95
		252	0.153587	0.86				252	1.23281	0.64
		253	0.694524	0.965				253	2.23063	1.365
		254	0.37145	0.405				254	4.29842	0.245
		255	0.737657	1.08				255	1.20895	0.98
		256	3.08815	0.5				256	0.472433	1.445
		257	0.31986	1.235				257	0.601796	1.32
		258	1.28857	1.055				258	1.07908	0.705
		259	0.179467	1.145				259	0.25588	1.025
		260	2.43242	1.18				260	0.563807	1.42
		261	6.14924	0.23				261	0.309098	1.2
		262	0.685404	0.99				262	1.81643	1.07
		263	0.181797	0.625				263	0.136893	0.88
		264	1.26028	0.92				264	0.151453	1.035
		265	1.13477	1.3				265	0.48465	1.385
		266	7.64587	0.3				266	0.226594	0.935
		267	0.476645	0.985				267	0.182748	0.8
		268	0.172336	1.13				268	0.745105	0.985
		269	1.37097	1.37				269	0.256081	0.98
		270	0.473492	0.39				270	0.770316	1.205
		271	1.10607	1.36				271	1.31546	1.23
		272	0.105168	1.02				272	1.53234	1.075
		273	0.901416	1.35				273	0.399231	1.09
		274	1.6491	1.33				274	0.916574	1.375
		275	2.59388	1.38				275	1.96611	1.375
		276	0.735386	1.295				276	0.948865	1.135
		277	1.59407	1.35				277	0.946966	1.365
		278	0.624384	0.67				278	1.34913	0.785
		279	6.74619	0.21				279	0.40752	0.92
		280	0.963854	1.105				280	3.82395	0.215
		281	0.358706	1.03				281	1.13518	0.31
		282	1.27542	1.38				282	0.683286	0.845
		283	0.737121	1.27				283	0.121047	0.92
		284	0.360282	1.05				284	0.727837	0.41
		285	1.04442	1.2				285	0.349327	0.925
		286	0.607356	1.155				286	1.98942	1.365
		287	0.546021	1.05				287	0.723002	1.265
		288	2.10635	1.255				288	4.30307	1.22
		289	0.552959	1.08				289	0.633753	1.335
		290	0.483425	1.35				290	1.96906	1.315
		291	1.35993	1.23				291	2.63839	1.185
		292	0.288541	0.97				292	0.781051	0.895
		293	0.407742	0.98				293	1.138	1.095
		294	1.73077	1.365				294	3.40502	1.045
		295	0.213489	1.14				295	2.74033	1.095
		296	0.572195	1.045				296	1.39028	1.08
		297	1.04048	1.055				297	9.86484	0.47
		298	19.7382	0.315				298	1.77287	1.265
		299	0.629022	1.205				299	1.73697	0.935
		300	0.18454	0.795				300	2.60778	0.985
		301	0.227292	1.025				301	1.01106	1.385
		302	1.57337	1.23				302	0.804452	1.125
		303	0.329032	1.195				303	3.41656	0.39
		304	2.82744	1.4				304	2.52219	1.355
		305	0.996838	1.335				305	0.51819	0.915
		306	1.17236	1.135				306	1.0032	1.27
		307	0.811397	1.09				307	3.79082	1.27
		308	1.08577	1.195				308	1.37297	0.445
		309	0.209614	0.855				309	0.386252	1.045
		310	2.10534	1.38				310	3.74716	0.27
		311	1.96878	1.165				311	3.44644	0.405
		312	2.60556	1.395				312	12.5356	0.205
		313	1.37854	1.38				313	12.7398	0.535
		314	2.42228	1.375				314	0.578861	1.075
		315	0.380805	1.24				315	1.9185	1.04
		316	0.962203	1.355				316	3.88959	1.02
		317	2.1407	1.33				317	8.07198	1.01
		318	0.628481	1.38				318	2.5672	1.335
		319	0.532333	1.375				319	4.89161	1.215
		320	0.631728	1.025				320	1.15341	1.395
		321	0.635696	1.15				321	2.78929	1.065
		322	1.43248	1.375				322	0.0979425	0.825
		323	1.08018	1.215				323	0.867515	1.045
		324	0.594567	1.24				324	3.19003	1.15
		325	1.86578	1.375				325	1.23566	0.175
		326	2.62559	1.38				326	2.20922	1.295
		327	0.606834	0.725				327	0.124152	0.995
		328	0.562819	1.155				328	1.70606	1.125
		329	1.0791	1.385				329	0.3847	0.92
		330	0.987638	1.195				330	1.04805	1.405
		331	0.35573	1.285				331	3.6794	1.375
		332	0.384954	1.125				332	1.9573	0.945
		333	0.574544	1.12				333	0.732672	1.02
		334	0.463784	1.025				334	0.0641454	0.92
		335	3.22286	1.29				335	0.73043	1.05
		336	0.686567	0.66				336	0.797162	0.885
		337	0.222241	0.995				337	1.38413	1.3
		338	1.46928	1.245				338	4.85168	0.64
		339	7.00366	0.18				339	1.60816	1.31
		340	0.755656	1.045				340	1.84408	1.3
		341	2.0496	1.315				341	0.767297	1.145
		342	7.0888	0.405				342	1.39739	1.2
		343	0.93294	1.085				343	8.00503	1.25
		344	0.181448	1.09				344	8.23924	0.93
		345	0.905011	1.21				345	1.77547	1.165
		346	0.458503	1.35				346	1.26531	0.915
		347	0.371462	0.995				347	0.664135	1.155
		348	0.751492	1.12				348	3.59765	1.08
		349	0.0109657	1.05				349	0.964553	1.355
		350	0.809576	1.07				350	1.46428	1.085
		351	1.48482	0.92				351	3.24403	1.07
		352	0.391509	1.405				352	0.60323	1.14
		353	1.0599	1.245				353	2.37956	1.265
		354	2.45734	0.93				354	1.6588	0.86
		355	0.657941	1.085				355	0.0804079	0.82
		356	2.00535	1.155				356	1.15035	1.385
		357	1.0587	1.25				357	0.09341	1.09
		358	0.759545	1.055				358	0.0372956	1.16
		359	2.53736	1.33				359	0.2106	0.9
		360	3.29159	1.26				360	0.659687	1.025
		361	3.45111	1.135				361	0.822385	1.055
		362	0.483689	1.4				362	0.095463	1.025
		363	1.30337	0.97				363	0.356874	1.02
		364	1.01878	0.95				364	1.13717	1.21
		365	0.146076	0.65				365	1.23212	1.375
		366	0.384429	1.29				366	4.93961	1.385
		367	3.03745	1.38				367	0.247022	1.225
		368	0.619284	0.88				368	0.933304	1.095
		369	0.498358	1.205				369	9.85632	1.08
		370	2.63137	1.3				370	6.39417	0.895
		371	1.11564	1.2				371	0.954015	0.96
		372	4.16659	1.275				372	0.923784	0.995
		373	1.21758	1.25				373	3.61213	0.885
		374	0.162733	1.255				374	0.142802	1.13
		375	0.443059	1.375				375	2.07171	1.275
		376	1.33168	1.405				376	1.2306	0.98
		377	6.26496	1.37				377	0.710167	1.14
		378	1.72743	1.275				378	0.751587	1.255
		379	1.52755	1.38				379	0.198252	1.355
		380	0.946248	1.345				380	0.700646	1.09
		381	1.47359	1.135				381	1.9416	1.375
		382	2.56075	1.31				382	1.50034	1.105
		383	1.4616	1.18				383	4.16446	1.07
		384	1.1547	1.35				384	6.4077	1.36
		385	1.55126	1.095				385	0.77664	1.275
		386	1.29572	1.41				386	3.17103	1.285
		387	1.62376	1.105				387	1.50184	1.135
		388	0.680954	1.265				388	0.566196	0.965
		389	0.673019	1.37				389	2.09977	0.72
		390	1.05046	1.385				390	1.12387	1.39
		391	1.5161	1.395				391	0.557177	0.92
		392	3.37465	1.38				392	0.184723	0.78
		393	1.9774	1.31				393	0.431912	1.12
		394	1.60771	1.17				394	12.0819	1.375
		395	0.318476	1.075				395	3.17473	1.375
		396	0.286556	0.905				396	2.74116	1.11
		397	1.40519	1.395				397	0.601212	1.13
		398	1.11935	1.085				398	0.573471	1.355
		399	1.10294	1.135				399	6.68268	1.23
		400	1.24613	1.325				400	5.70269	1.025
		401	0.265096	0.675				401	1.39335	1.365
		402	0.543912	0.78				402	1.04369	1.35
		403	2.21572	1.355				403	2.66273	1.265
		404	1.87503	1.375				404	3.38021	1.04
		405	2.09443	1.125				405	2.75554	0.94
		406	1.89875	1.355				406	1.16253	0.875
		407	0.0670232	0.675				407	2.60382	0.94
		408	0.548045	1.395				408	1.94508	1.25
		409	0.53978	1.215				409	1.04745	1.15
		410	3.92903	1.38				410	0.614226	1.28
		411	0.946591	1.335				411	0.482887	0.735
		412	5.46751	0.105				412	0.432886	1.08
		413	0.248148	1.225				413	5.80698	1.25
		414	0.702217	1.36				414	2.56067	0.775
		415	0.551639	1.35				415	0.83221	1.17
		416	1.25763	1.39				416	2.81924	1.365
		417	0.527022	1.37				417	2.49184	1.375
		418	1.39872	1.35				418	0.248293	0.96
		419	0.973811	1.37				419	6.84929	1.375
		420	1.10786	1.295				420	3.10914	1.41
		421	1.30665	1.365				421	1.70175	1.395
		422	1.32534	1.18				422	1.37623	1.09
		423	1.4085	1.355				423	0.22569	0.98
		424	1.96408	1.345
		425	0.871533	1.37
		426	0.721119	1.37
		427	1.24105	1.205
		428	0.784936	1.095
		429	2.18995	1.39
		430	0.645039	1.135
		431	1.05374	1.2
		432	0.76905	1.13
		433	0.533249	1.38
		434	0.566139	1.395
		435	0.408171	1.105
		436	0.21058	1.1
		437	1.94145	1.34
		438	0.0443325	0.915
		439	1.539	1.375
		440	1.36738	1.14
		441	0.289374	1.185
		442	2.17593	1.375
		443	1.1613	1.265
		444	0.907605	1.37
		445	2.04484	1.25
		446	1.39388	1.135
		447	0.746207	1.145
		448	0.616672	0.915
		449	0.167806	1.12
		450	0.147717	1.4
		451	0.590696	1.41
		452	0.754346	1.375
		453	0.895656	1.275
		454	0.496663	1.26
		455	3.00976	1.07
		456	3.53344	1.38
		457	2.20364	1.39
		458	0.238807	1.185
		459	1.90116	1.395
		460	1.13063	1.195
		461	2.18148	1.27
		462	0.290154	1.225
		463	0.82082	1.09
		464	1.18839	1.055
		465	1.56351	1.38
		466	2.42511	1.115
		467	2.90458	1.405
		468	2.15727	1.375
		469	16.2729	0.115
		470	1.90863	1.375
		471	1.92731	1.365
		472	2.23747	1.3
		473	0.644492	1.09
		474	0.692473	1.23
		475	9.5536	0.34
		476	1.01206	1.03
		477	0.91353	1.095
		478	2.37662	1.385
		479	1.63342	1.35
		480	1.14487	1.365
		481	2.27449	1.385
		482	0.15354	1.225
		483	1.85191	1.205
		484	1.47405	1.29
		485	0.925183	1
		486	1.08952	1.335
		487	1.4307	1.435
		488	0.16982	1.015
		489	0.208376	1.115
		490	1.47902	1.15
		491	2.11267	1.12
		492	0.450612	1.21
		493	1.88502	1.11
		494	1.86338	1.125
		495	1.13423	1.055
		496	2.38359	1.38
		497	1.68594	1.29
		498	1.93557	1.35
		499	0.283905	1.105
		500	2.77967	1.155
		501	1.58467	1.385
		502	0.883393	1.11
		503	1.31617	1.08
		504	0.90434	1.36
		505	0.668388	1.175
		506	1.52339	1.125
		507	0.849983	1.01
		508	0.894819	1.255
		509	1.86433	1.355
		510	1.9927	1.365
		511	1.53774	1.13
		512	1.29639	1.38
		513	0.114333	1.11
		514	0.190103	1.265
		515	1.20235	1.325
		516	2.0338	1.35
		517	1.6656	1.395
		518	1.45503	1.36
		519	0.829588	1.19
		520	1.9856	1.245
		521	1.25631	1.13
		522	1.09698	1.215
		523	0.767178	1.375
		524	1.60505	0.995
		525	0.437711	1.125
		526	0.104354	1.145
		527	0.160844	1.005
		528	0.987725	1.08
		529	1.82051	1.195
		530	0.228218	1.205
		531	2.22516	1.205
		532	0.63152	1.035
		533	0.696532	1.25
		534	1.04639	1.295
		535	0.190882	1
		536	1.62825	1.1
		537	0.93119	1.38
		538	0.629183	1.385
		539	0.68767	1.31
		540	1.33015	1.375
		541	0.451062	0.765
		542	0.354554	1.005
		543	1.19268	1.31
		544	1.54464	1.415
		545	0.770852	1.16
		546	0.654109	1.27
		547	0.536155	1.01
		548	0.698558	1.33
		549	0.355592	0.96
		550	0.350057	1.38
		551	0.888836	1.08
		552	2.12672	1.08
		553	2.51083	1.095
		554	1.57484	1.29
		555	1.48841	1.2
		556	1.28259	1.225
		557	0.988063	1.345
		558	0.22773	1.165
		559	0.0544339	1.085
		560	0.878082	1.21
		561	1.07619	1.145
		562	1.54753	1.37
		563	2.24675	1.085
		564	1.10134	1.355
		565	0.380608	0.185
		566	0.43869	1.35
		567	0.328163	0.945
		568	1.97667	1.06
		569	2.15655	1.385
		570	3.97742	1.365
		571	1.72162	1.125
		572	0.855342	0.915
		573	1.18231	1.065
		574	1.93772	1.185
		575	1.29694	1.18
		576	1.85538	1.235
		577	1.20161	0.865
		578	1.32751	0.865
		579	1.79405	1.085
		580	0.957669	1.035
		581	0.82613	1.125
		582	4.24699	1.355
		583	0.440227	1.095
		584	4.01654	1.13
		585	3.18504	1.37
		586	0.542342	1.065
		587	0.255526	0.735
		588	0.871918	1.29
		589	3.83724	1.25
		590	1.05965	0.925
		591	0.786221	0.98
		592	0.677753	1.07
		593	2.53301	1.375
		594	2.38352	1.21
		595	1.47979	0.76
		596	1.55071	1.395
		597	2.61037	1.415
		598	1.94843	1.15
		599	1.22548	1.28
		600	0.583225	1.105
		601	2.12528	1.39
		602	1.92026	1.14
		603	2.51566	1.34
		604	3.7341	1.265
		605	1.97051	1.365
		606	2.16892	1.38
		607	1.53475	1.4
		608	1.28591	1.07
		609	0.984388	1.345
		610	3.08375	1.385
		611	2.70589	1.19
		612	1.5271	1.37
		613	3.62907	1.1
		614	2.51896	1.235
		615	3.95581	0.945
		616	2.08789	1.195
		617	1.02177	1.29
		618	0.7672	1.305
		619	0.378905	0.735
		620	0.631566	1.315
		621	0.896573	1.13
		622	20.1731	0.455
		623	1.42068	1.03
		624	1.97295	1.28
		625	0.566705	0.93
		626	0.948566	1.375
		627	1.03516	1.285
		628	2.37133	1.125
		629	2.91021	0.905
		630	1.20905	1.11
		631	1.8587	1.36
		632	0.373514	0.935
		633	0.607395	1.195
		634	2.24369	1.375
		635	2.09154	1.36
		636	1.91678	1.385
		637	0.567227	1.03
		638	0.945262	1.115
		639	1.625	1.095
		640	1.94408	1.19
		641	0.16989	0.94
		642	1.248	1.37
		643	0.130765	1.03
		644	0.824409	1.285
		645	0.340823	0.845
		646	1.9966	1.11
		647	0.986474	1.19
		648	1.0882	1.37
		649	0.620437	1.1
		650	1.65699	1.17
		651	0.981779	1.01
		652	0.524102	1.065
		653	0.177889	0.94
		654	1.1981	1.245
		655	0.880054	1.375
		656	1.9333	1.2
		657	0.384469	1.175
		658	2.69528	1.225
		659	3.6795	1.37
		660	0.165195	0.945
		661	2.47445	1.165
		662	0.579435	1.175
		663	2.27527	1.345
		664	2.20533	1.195
		665	1.30625	1.4
		666	1.90922	1.37
		667	2.0989	1.24
		668	1.07904	1.04
		669	1.97284	1.08
		670	4.06611	1.365
		671	0.160679	0.835
		672	2.61437	1.135
		673	0.480844	1.215
		674	1.27622	1.13
		675	1.89421	1.125
		676	0.706341	1.395
		677	2.03323	1.08
		678	1.15392	1.375
		679	3.98134	1.33
		680	1.91161	1.385
		681	0.698836	1.015
		682	0.744208	1.21
		683	0.485961	1.25
		684	1.28936	1.375
		685	4.74516	1.055
		686	0.855934	1.045
		687	0.653805	1.24
		688	0.573806	1.095
		689	2.10009	1.095
		690	1.97011	1.355
		691	2.4977	1.375
		692	0.695766	1.305
		693	1.30181	1.135
		694	2.88114	1.37
		695	0.818066	1.145
		696	0.366049	1.07
		697	0.332276	1.05
		698	0.511036	1.145
		699	2.02862	1.12
		700	0.252789	1.35
		701	0.4527	0.805
		702	2.7875	1.37
		703	0.146522	0.96
		704	0.990856	0.97
		705	0.255006	1.39
		706	1.82223	1.245
		707	0.844335	0.985
		708	1.63528	0.98
		709	1.67212	1.145
		710	0.811755	1.23
		711	0.360249	1.25
		712	4.43028	1.355
		713	0.371678	0.95
		714	2.31911	0.975
		715	2.73268	0.97
		716	0.736929	1.21
		717	2.2999	1.34
		718	1.3096	1.39
		719	2.08351	1.14
		720	0.874773	1.08
		721	1.63999	1.135
		722	2.2101	1.095
		723	0.515424	1.025
		724	1.78294	1.13
		725	2.60012	1.365
		726	0.797928	1.045
		727	1.39514	1.18
		728	1.72075	1.305
		729	0.544731	0.995
		730	1.49124	1.315
		731	0.314707	1.155
		732	1.86541	1.14
		733	0.0182315	0.855
		734	2.57712	1.21
		735	1.40928	1.22
		736	2.10651	1.115
		737	0.339924	0.965
		738	0.396152	1.02
		739	18.1683	0.505
		740	1.30722	1.385
		741	0.707281	1.125
		742	1.80202	1.39
		743	1.79708	1.08
		744	0.68905	1.065
		745	0.617316	1.105
		746	1.14007	1.1
		747	3.17246	1.255
		748	1.44779	1.095
		749	1.61	1.135
		750	1.71393	0.825
		751	1.07276	1.025
		752	1.93152	1.245
		753	0.624486	1.125
		754	2.28929	1.29
		755	2.76025	1.275
		756	1.99941	1.085
		757	17.2208	0.39
		758	1.05253	1.165
		759	2.13461	1.16
		760	1.6341	1.12
		761	3.04699	1.07
		762	1.65143	1.145
		763	2.25132	1.11
		764	0.412858	1.175
		765	1.11097	1.13
		766	2.90668	1.075
		767	2.11332	1.34
		768	1.16412	1.29
		769	0.692333	0.945
		770	2.0907	1.17
		771	1.28793	1.17
		772	0.23507	1.03
		773	27.2932	0.43
		774	2.24406	1.265
		775	12.1878	0.13
		776	1.38516	1.025
		777	0.593287	1.08
		778	0.884483	1.1
		779	2.43059	1.37
		780	0.981548	1.225
		781	1.93998	1.32
		782	1.19648	1.115
		783	1.13111	1.37
		784	1.25888	1.37
		785	1.27638	1.275
		786	0.848661	1.005
		787	2.81044	0.895
		788	1.89063	0.875
		789	0.519993	1.14
		790	1.59861	1.395
		791	1.06062	1.22
		792	2.10869	1.38
		793	1.28133	1.12
		794	1.88039	1.405
		795	1.46356	1.24
		796	0.336449	1.025
		797	1.52025	1.36
		798	1.79984	1.045
		799	1.02988	0.945
		800	1.70717	1.09
		801	1.17678	1.11
		802	22.7882	0.42
		803	0.895092	1.245
		804	1.44847	1.025
		805	0.888773	1.075
		806	1.3207	1.035
		807	1.25172	1.13
		808	1.09868	1.21
		809	1.33298	1.21
		810	0.667458	1.11
		811	1.91988	1.235
		812	2.05011	1.35
		813	0.755036	1.035
		814	2.31636	1.005
		815	1.53359	1.03
		816	2.09434	1.11
		817	3.00628	1.27
		818	2.25001	1.08
		819	1.36914	1.28
		820	1.22347	1.225
		821	2.28143	1.235
		822	2.48871	1.195
		823	1.81142	1.32
		824	2.28547	0.95
		825	2.21368	1.29
		826	1.5127	1.275
		827	0.869116	1.155
		828	2.00518	1.155
		829	1.21645	1.215
		830	0.369796	0.945
		831	0.111974	1.05
		832	0.696943	1.1
		833	0.305911	1.02
		834	0.815937	0.985
		835	2.15068	1.38
		836	1.95112	0.86
		837	2.82112	1.29
		838	3.56948	1.255
		839	2.48799	1.375
		840	0.555563	1.305
		841	2.28719	1.4
		842	3.20865	0.22
		843	0.377517	1.36
		844	0.713845	1.14
		845	0.215416	1.29
		846	0.740751	1.26
		847	0.90169	1.325
		848	0.212592	1.23
		849	0.287	0.76
		850	0.0760682	1.09
		851	0.147984	1.36
		852	0.969952	1.385
		853	1.7396	1.4
		854	0.820972	0.895
		855	0.385988	0.84
		856	1.37504	1.38
		857	1.39397	1.36
		858	0.0648349	0.765
		859	10.0026	0.44
		860	0.599638	0.27
		861	2.44285	1.4
		862	0.542101	0.69
		863	1.06553	1.32
		864	0.668376	1.2
		865	0.571633	1.38
		866	0.755445	1.34
		867	1.99987	1.36
		868	0.497973	1.01
		869	2.99075	1.4
		870	1.37828	1.06
		871	0.682077	1.38
		872	0.00941492	1.105
		873	0.0763281	0.815
		874	1.06372	1.35
		875	0.673503	0.795
		876	1.65097	1.385
		877	1.91451	1.385
		878	2.11229	1.435
		879	0.106727	0.765
		880	1.37262	1.355
		881	1.24431	1.39
		882	1.83021	1.415
		883	0.0709829	1.14
		884	0.720451	0.785
		885	0.10403	0.785
		886	0.751643	0.985
		887	2.19233	1.385
		888	1.87657	1.335
		889	1.72055	1.355
		890	1.72294	1.36
		891	2.12938	1.395
		892	0.52452	1.365
		893	0.0558036	1.22
		894	0.416655	0.715
		895	0.355408	1.385
		896	1.75713	1.165
		897	1.49615	1.385
		898	3.71791	1.385
		899	0.507847	1.355
		900	1.18293	1.38
		901	0.753089	1.41
		902	1.89247	1.37
		903	2.10603	1.375
		904	0.802488	1.34
		905	0.876756	0.28
		906	0.37268	1.33
		907	1.44804	1.37
		908	2.29136	1.395
		909	10.7652	0.46
		910	1.46955	1.395
		911	15.0021	0.405
		912	0.00739311	1.035
		913	0.142485	0.775
		914	2.69529	1.04
		915	0.284131	1.115
		916	0.586744	1.255
		917	0.641352	1.425
		918	1.42595	1.33
		919	1.08758	1.375
		920	1.96373	0.95
		921	0.0800245	1.005
		922	0.363403	1.245
		923	1.07095	1.405
		924	0.240897	1.23
		925	0.375259	1.405
		926	0.4785	1.4
		927	0.891796	1.375
		928	0.64777	1.195
		929	1.84672	1.41
		930	2.18645	1.38
		931	1.05231	1.38
		932	1.77426	1.39
		933	1.78899	1.39
		934	0.458376	1.345
		935	0.809311	1.255
		936	0.548578	1.345
		937	2.59529	1.385
		938	0.778351	1.4
		939	0.944699	1.4
		940	0.354785	1.135
		941	0.718685	1.37
		942	2.94468	1.38
		943	2.5021	1.36
		944	0.82471	1.355
		945	1.48917	1.355
		946	1.64994	1.065
		947	2.67202	1.38
		948	2.36931	1.375
		949	1.75821	1.135
		950	1.96801	1.365
		951	1.45585	1.385
		952	1.84558	1.385
		953	5.16825	1.36
		954	1.13467	1.3
		955	0.702972	1.39
		956	0.576053	1.38
		957	0.513889	1.3
		958	6.4623	1.375
		959	1.04626	1.39
		960	3.80813	1.32
		961	1.08623	1.155
		962	1.54127	1.345
		963	1.43452	1.405
		964	4.72253	1.39
		965	10.6743	0.445
		966	1.88379	1.385
		967	1.26013	1.18
		968	3.06089	1.375
		969	1.53902	1.18
		970	3.872	1.39
		971	0.484712	1.15
		972	1.52138	1.38
		973	0.589379	1.185
		974	2.43356	1.395
		975	3.41695	0.495
		976	1.7121	0.965
		977	1.64554	1.385
		978	3.28332	1.395
		979	2.27027	1.345
		980	2.11249	1.335
		981	2.11697	1.1
		982	3.0895	1.21
		983	4.23481	1.275
		984	1.88643	1.38
		985	2.06748	1.405
		986	2.65807	1.245
		987	0.627315	1.375
		988	1.28912	1.38
		989	1.9792	1.385
		990	4.17642	1.36
		991	2.81462	1.38
		992	0.786458	1.38
		993	1.88001	1.37
		994	2.64628	1.37
		995	0.645145	1.14
		996	1.24307	1.19
		997	2.92069	1.385
		998	7.45159	0.535
		999	2.77681	1.37
		1000	6.03675	1.345
		1001	3.56019	1.3
		1002	1.29867	1.37
		1003	2.797	1.375
		1004	3.49535	1.375
		1005	1.99069	1.385
		1006	2.18059	1.06
		1007	4.15418	1.38
		1008	3.1046	1.365
		1009	3.07312	1.115
		1010	2.09933	1.395
		1011	0.877815	1.265
		1012	0.251831	0.98
		1013	1.30038	1.345
		1014	0.852837	1.355
		1015	1.72637	1.38
		1016	1.77855	1.1
		1017	1.52484	0.37
		1018	3.88621	1.395
		1019	0.966207	1.28
		1020	3.03257	1.255
		1021	1.45724	1.375
		1022	1.34117	0.985
		1023	2.21451	1.225
		1024	1.60489	1.385
		1025	0.807706	1.25
		1026	1.37908	1.04
		1027	2.02027	1.37
		1028	1.65934	1.385
		1029	1.4519	1.375
		1030	4.20121	1.375
		1031	1.41115	1.3
		1032	2.84351	1.375
		1033	1.30258	1.24
		1034	2.30954	1.37
		1035	2.02093	1.37
		1036	1.04053	1.3
		1037	0.0940319	1.26
		1038	2.35681	1.375
		1039	2.50713	1.39
		1040	1.61625	1.38
		1041	1.2762	1.19
		1042	0.610287	1.2
		1043	2.41666	1.385
		1044	2.49595	1.375
		1045	0.712344	1.355
		1046	2.21101	1.375
		1047	1.23188	1.335
		1048	0.955158	1.375
		1049	0.268499	1.245
		1050	3.04972	1.37
		1051	1.47486	1.39
		1052	0.893855	1.27
		1053	1.78822	1.39
		1054	2.03789	1.385
		1055	0.231683	1.405
		1056	1.11698	1.215
		1057	1.24318	1.34
		1058	1.25003	1.33
		1059	0.679809	1.11
		1060	0.740085	1.245
		1061	1.99011	1.39
		1062	1.56065	1.245

## Sheet: Figure 5–figure supplement 2C
Figure 5–figure supplement 2C	Data	Proportions of neurons classified as MSNs, FSIs, TANs, and UIs.
	Subjects
	Softwear
	Dependent variable	Number of neurons
	Stats
			Cell types
			MSNs	FSIs	TANs	UIs
	Subregions	aDLS	1019	28	1	14
		pVLS	387	25	2	9
