# Supplementary material for: Acquisition of auditory discrimination mediated by different processes through two distinct circuits linked to the lateral striatum
Source: eLife. 2025 Jul 11;13:RP97326. doi: 10.7554/eLife.97326 (PMC12252547; doi:10.7554/eLife.97326)
Supplement: Figure 5—figure supplement 3—source data 1. [file elife-97326-fig5-figsupp3-data1.xlsx]

## Sheet: Figure 5–figure supplement 3A_1
Figure 5–figure supplement 3A (maps)	Data	Changes in event-related firing activity of HR type neurons during the acquisition phase of auditory discrimination task
	Subjects
	Softwear
	Dependent variable
	Stats
	Z-scored event-related firing rate in the aDLS at the early stage
			Time bin
			1	2	3	4	5	6	7	8	9	10	11	12	13	14	15	16	17	18	19	20	21	22	23	24	25	26	27	28	29	30	31	32	33	34	35	36	37	38	39	40	41	42	43	44	45	46	47
	# of neurons	1	2.37749	0.897579	1.79836	0.768964	-0.131818	0.447307	-0.453593	-0.453593	0.511615	1.15505	-0.389167	0.189839	0.447307	-0.582209	0.962006	0.897579	0.511615	1.73405	1.34809	0.189839	0.382881	-0.324859	0.962006	-0.196244	-0.324859	0.125532	-0.00308378	-0.710942	-0.06751	1.15505	0.254266	1.60532	0.511615	2.12014	0.897698	1.4767	0.0612239	1.15505	-0.260552	1.09074	1.73405	1.54101	0.704656	1.02631	0.382881	0.511615	1.4767
		2	2.46986	1.13522	1.03968	0.933465	0.448954	0.487006	-0.113594	0.234437	1.10993	0.842822	0.277388	0.547382	0.487006	0.380715	1.17817	1.25123	0.413867	1.22883	0.971517	-0.148681	0.0960238	0.088239	0.598118	-0.174049	-0.375803	-0.0755423	-0.0452754	-0.0531393	0.259805	0.610801	0.0102803	0.910983	0.181846	1.25419	0.323225	0.94125	-0.00240365	0.494791	-0.332931	0.56793	0.880795	0.868111	0.774583	0.524979	0.328045	0.181846	0.94125
		3	2.84277	1.21427	0.35093	1.35565	0.789604	0.615323	0.267822	1.25285	1.27901	1.265	0.577271	1.39423	1.46465	0.680598	1.17569	0.905614	1.21995	1.13631	0.756701	-0.151164	-0.331125	0.216556	0.383302	-0.176532	-0.0351537	-0.118792	0.254607	0.712175	0.00422304	0.820651	0.138597	0.222235	0.563262	0.312347	0.279975	0.383302	0.338246	0.279975	0.0484845	0.312347	0.363613	-0.0737357	0.731333	0.35093	-0.0991035	0.138597	0.170969
		4	3.50761	1.11467	-0.240705	0.764012	0.690009	-0.105006	0.55431	1.77399	0.687379	0.415981	0.243025	1.18868	0.744324	0.475046	0.690009	0.571368	1.09762	0.650632	-0.221017	0.347238	-0.196068	0.0110041	0.601577	-0.124695	-0.240705	-0.453038	-0.102376	1.23331	0.0333226	0.675581	-0.218387	-0.00605408	0.44093	-0.430719	-0.569048	0.132275	-0.124695	-0.334397	0.206279	-0.196068	-0.122065	-0.66537	0.0110041	-0.240705	-0.43335	0.0162645	-0.314709
		5	3.95061	0.876285	0.658147	0.347515	0.598679	-0.142423	0.663953	1.38854	-0.224209	0.641634	-0.289483	0.772181	0.559848	-0.289483	0.0104419	-0.0771499	1.02915	0.729226	0.151696	0.626804	0.555725	0.445814	0.943241	0.0699095	0.805206	0.445814	0.533406	0.963877	-0.414223	0.839136	0.092228	0.304561	1.04566	0.615192	0.00463621	0.17982	0.0699095	0.092228	0.516893	0.555725	0.157501	-0.795934	0.00463621	0.511088	-0.207696	0.0327605	-0.120105
		6	2.68285	0.245532	0.452059	-0.283237	0.392592	-0.136178	0.245532	0.333124	-0.430297	0.0108813	-0.283237	-0.283237	-0.283237	-0.283237	-0.195646	-0.283237	0.186065	0.0984731	0.157941	0.420716	0.774302	0.452059	0.949486	-0.136178	0.599119	0.452059	0.539651	0.333124	-0.195646	0.420716	0.0984731	0.0984731	0.627243	0.83377	0.0108813	0.186065	-0.136178	0.0984731	0.0984731	0.774302	-0.0485863	-0.577356	0.0108813	0.305	0.0108813	0.0390055	0.0984731
		7	1.32786	0.298444	0.739622	0.00432528	0.445503	0.151385	0.298444	0.151385	-0.142734	0.298444	0.00432528	0.00432528	0.00432528	0.00432528	-0.142734	0.00432528	0.00432528	0.151385	0.445503	0.00432528	0.592563	0.739622	0.298444	0.151385	0.886681	0.739622	0.592563	0.151385	-0.142734	0.00432528	0.151385	0.151385	0.445503	0.886681	0.298444	0.00432528	0.151385	0.151385	0.151385	0.592563	0.00432528	-0.289793	0.298444	0.592563	0.298444	-0.142734	0.151385
		8	0	0	0	0	0	0	0	0	0	0	0	0	0	0	0	0	0	0	0	0	0	0	0	0	0	0	0	0	0	0	0	0	0	0	0	0	0	0	0	0	0	0	0	0	0	0	0
		9	0	0	0	0	0	0	0	0	0	0	0	0	0	0	0	0	0	0	0	0	0	0	0	0	0	0	0	0	0	0	0	0	0	0	0	0	0	0	0	0	0	0	0	0	0	0	0
		10	0	0	0	0	0	0	0	0	0	0	0	0	0	0	0	0	0	0	0	0	0	0	0	0	0	0	0	0	0	0	0	0	0	0	0	0	0	0	0	0	0	0	0	0	0	0	0
		11	0.439255	0.814708	0.564406	0.439255	0.439255	0.37668	0.37668	0.0638025	0.00122697	0.251529	0.00122697	0.689557	0.0638025	0.251529	-0.0613485	0.188953	-0.123924	0.00122697	0.126378	0.126378	0.188953	0.314104	0.314104	0.00122697	0.37668	0.564406	0.501831	0.689557	0.626982	0.689557	0.626982	0.188953	0.188953	-0.249075	-0.0613485	-0.123924	0.126378	-0.0613485	-0.0613485	-0.0613485	0.0638025	-0.1865	0.00122697	0.314104	-0.0613485	0.689557	0.564406
		12	0.430657	1.68313	0.906616	0.781465	0.430657	0.192678	0.543485	0.0552042	-0.00737125	0.242931	0.168032	0.505555	0.230608	0.067527	-0.420754	0.00495149	-0.48333	-0.00737125	0.293183	0.468587	0.180355	0.305506	0.130102	-0.00737125	0.192678	0.380404	0.668636	0.856363	0.969191	1.20717	0.618384	0.531163	0.00495149	0.0931342	0.456264	-0.132522	0.11778	0.280861	0.631668	0.456264	0.932223	-0.019694	0.343436	0.48091	0.105457	0.330152	0.205001
		13	0.402022	2.51355	0.87798	0.752829	0.23021	-0.00776885	0.858473	0.198381	-0.207818	0.214295	0.139397	0.305109	0.373784	0.210703	-0.105766	-0.0236838	-0.855588	-0.37963	0.264548	0.26814	0.323532	0.276871	0.101467	0.479428	0.507666	0.695392	1.32725	0.827728	1.45599	1.00672	0.76156	1.01796	0.491751	0.408122	1.28669	-0.161158	0.432768	0.595849	1.11847	0.427629	1.41902	0.467105	0.486613	0.967709	0.248633	1.16057	0.0045539
		14	0.687864	2.03672	0.457834	1.4259	0.32244	-0.046576	0.819666	0.278838	0.128828	-0.0865857	0.282431	-0.433801	0.26063	0.49066	0.0998425	0.512461	0.187046	0.344241	0.863268	0.673248	-0.108387	-0.0865857	0.318848	0.622462	0.275246	0.275246	0.582452	0.669656	0.586044	0.848652	-0.108387	1.55411	0.834283	0.607845	1.10507	0.107027	0.0634249	0.607845	1.13046	0.246013	1.49948	0.797865	0.629646	0.797865	0.647855	0.228052	-0.415592
		15	0.506036	1.67572	0.739357	1.94004	0.605845	0.063308	0.462434	0.329627	0.528541	-0.0357972	0.390432	-0.207609	0.368631	1.18209	0.617747	1.20389	0.821259	0.511338	0.854961	0.373229	0.0587101	-0.152106	1.01027	0.67325	0.850363	0.850363	1.27199	0.312424	0.286025	0.95477	0.175018	1.4867	1.06048	0.191518	0.280723	0.50674	-0.118403	0.191518	0.363329	0.235823	0.440633	0.67325	0.213319	0.556942	0.406931	0.51334	-0.130305
		16	0.898944	0.655005	1.13226	2.88751	2.00241	0.350745	0.511719	-0.00384084	0.815978	-0.197453	0.783339	-0.197453	0.0351632	0.848617	0.112467	1.59679	1.28051	0.970587	0.693305	0.383384	-0.274758	-0.0364799	0.848617	-0.00384084	0.345084	0.345084	0.423092	0.150768	-0.113784	1.24221	0.118832	2.19602	0.383384	0.240802	-0.185427	1.17693	0.485445	0.518084	0.518084	0.628731	0.87267	-0.00384084	0.988978	-0.120149	0.628027	-0.507374	-0.120149
		17	0.617876	0.12326	0.794131	1.58131	2.55286	0.456903	0.617876	-0.341974	0.922136	0.295929	0.445207	-0.341974	0.528546	0.12326	-0.225665	0.677823	0.167925	0.0516164	-0.225665	0.295929	1.05014	0.456903	1.39907	0.295929	0.644854	0.644854	1.11009	0.0633128	-0.0646919	1.15475	0.167925	1.91495	-0.341974	0.0962816	0.501568	0.838797	0.534537	0.373563	0.373563	0.677823	0.534537	-0.341974	1.28875	-0.458282	0.0962816	0.179621	0.179621
		18	0.459802	-0.314464	0.0309994	0.794663	3.18415	1.43712	0.878003	0.103737	1.22802	1.15984	0.867401	0.521937	0.95074	-0.314464	0.521937	0.2401	-0.037182	0.381019	-0.523564	0.323439	0.543142	0.600721	0.752242	0.114339	-0.0947614	0.114339	0.74164	0.114339	-0.455383	0.600721	-0.037182	1.50075	-0.732664	0.0309994	0.668902	0.308281	1.00376	0.308281	0.308281	0.4492	0.376463	-0.523564	1.22347	-0.523564	-0.178101	0.114339	0.53254
		19	-0.17689	-0.396593	-0.605693	-0.396593	2.575	2.51002	0.24131	0.308071	1.15507	1.65064	0.803634	1.01273	1.15507	0.176333	1.2992	0.462795	-0.11013	0.0216079	-0.31923	0.24131	0.747475	0.527773	0.956576	0.891598	0.96896	0.318673	0.659511	0.318673	-0.528331	0.24131	-0.396593	0.03221	-0.814793	-0.605693	0.03221	-0.0327678	-0.187492	-0.0327678	-0.0327678	-0.187492	0.0445945	-0.0327678	0.891598	-0.0327678	-0.814793	0.03221	0.736873
		20	-0.703845	-0.285644	-0.494744	-0.285644	1.41015	3.39278	-0.285644	0.419019	2.03782	1.12368	0.914582	1.12368	0.62812	0.287281	1.41015	0.573744	0.000818562	0.132557	-0.208282	-0.285644	0.992323	0.000818562	-0.208282	0.364644	0.442006	-0.208282	0.132557	-0.208282	-0.417382	-0.285644	-0.285644	0.914961	-0.703845	-0.494744	-0.494744	0.0781809	1.33316	1.48789	0.0781809	-0.0765438	0.155543	0.0781809	0.364644	0.0781809	-0.703845	-0.494744	0.209919
		21	0.432967	-0.171603	-0.171603	-0.0204603	1.14121	2.67042	0.735251	0.568287	1.97799	0.25018	0.552465	0.0990381	0.11486	0.552465	0.838928	1.4435	0.11486	0.432967	0.11486	-0.0204603	1.37342	0.11486	-0.0362822	0.536643	0.823106	-0.0362822	-0.473887	-0.0362822	0.266002	-0.473887	0.130682	1.2381	-0.473887	-0.171603	-0.473887	0.0990381	0.935818	1.3576	0.552465	-0.473887	0.385501	1.00589	0.99007	0.552465	0.432967	-0.625029	-0.338567
		22	1.23038	0.324406	0.726274	0.375081	0.777833	1.83458	1.53266	1.38063	2.28801	0.675599	0.776949	0.524456	0.625807	0.576015	0.877416	1.48199	0.424873	0.928975	0.424873	0.375081	1.88437	0.324406	0.0727968	0.273731	0.0727968	0.0727968	0.122589	-0.0276702	0.776949	-0.178812	0.224823	1.93505	0.122589	0.123472	-0.178812	0.0221215	1.23089	1.58209	0.174147	-0.279279	0.122589	0.928975	0.32529	0.676482	1.02944	-0.530889	-0.430422
		23	2.45444	0.482012	1.18858	0.98974	0.783088	1.64894	1.99497	2.75705	1.49296	1.29026	0.934555	0.986764	0.631062	0.58127	1.18737	1.79194	0.582479	1.08658	0.430128	0.532687	0.632271	1.39612	0.992158	0.126634	0.230403	0.382754	-0.0245079	-0.0224155	1.08691	-0.173558	0.53478	0.835297	0.127843	0.128727	-0.0212067	0.179727	-0.0212067	0.0252838	0.636455	-0.121674	0.737248	1.69599	0.635247	0.834088	1.0347	-0.677985	-0.272816
		24	1.59784	0.765767	0.802608	0.58657	0.077633	1.79875	1.23792	2.98922	0.92145	1.45726	0.531385	1.43886	0.111142	0.312046	0.784203	0.650257	1.00018	0.765767	0.981775	0.6653	1.20111	1.41198	1.15916	0.427586	0.263463	0.415814	0.159695	-0.391193	0.817682	0.144591	0.516251	0.717215	0.847829	0.680374	0.430888	1.1676	0.296942	0.896412	0.367231	0.464366	1.18934	0.973334	0.884609	1.10065	0.579937	-0.744478	-0.339309
		25	0.910557	0.379882	0.0148556	0.301152	-0.308252	1.31239	0.550639	3.22677	0.435098	0.569044	-0.155901	1.16376	-0.576144	-0.174306	0.609571	0.475625	0.513828	1.60612	0.495423	0.993003	1.12695	2.25234	1.48687	-0.0587655	-0.021955	0.130396	-0.326657	0.036977	0.130396	-0.0403603	0.532234	0.743517	0.974598	0.495423	0.245937	0.78172	0.111991	0.822247	0.282747	0.379882	0.70299	1.20057	0.800125	1.12695	0.0935856	-0.728495	-0.423792
		26	0.120075	0.903382	0.109891	-0.0655671	0.0581945	0.460032	0.521913	2.16018	0.87283	0.511729	0.0581945	0.949391	-0.45722	0.254021	0.609434	0.970535	0.727924	1.82022	0.92375	1.08334	1.77421	1.36668	1.43425	0.645675	0.439664	0.501545	0.625306	0.712828	0.00649784	0.202325	0.593978	0.74338	1.34104	1.04751	0.460032	1.24334	0.140444	1.1554	-0.055383	0.346454	-0.0350147	0.433976	0.243061	1.1554	0.150628	-0.704744	-0.519101
		27	0.0353677	0.282891	0.159129	0.925958	0.511603	-0.0265132	0.573484	1.67596	2.26852	0.697246	1.04972	0.462846	-0.274037	0.0353677	0.524727	1.01977	-0.0265132	1.19973	0.0353677	1.53908	1.01977	1.01409	2.15789	0.697246	1.29724	0.282891	0.944769	0.896012	-0.212156	-0.150275	-0.0265132	0.524727	1.12472	0.159129	-0.0265132	0.22101	-0.212156	1.4772	-0.274037	-0.274037	0.0165563	0.753439	-0.107205	0.939081	0.202199	0.0165563	0.202199
		28	0.0515882	0.53943	0.535828	1.06234	0.407664	0.470345	0.950183	0.706261	2.76538	2.27554	1.90706	0.94738	0.5833	1.13302	0.889102	1.62447	-0.130452	0.470345	0.532226	1.42282	0.422873	0.0443836	1.68115	0.713466	1.43362	0.899908	1.20131	0.419271	0.284702	0.106264	0.350185	-0.0721735	0.888302	0.655987	0.109867	0.477549	-0.0757758	1.00046	-0.257816	0.342981	0.393255	0.276698	-0.0909849	0.5825	0.458738	0.393255	0.09826
		29	-0.45831	-0.217991	-0.0978319	0.738082	-0.0403532	0.0223275	0.440284	0.812322	1.63668	2.13407	2.93563	1.60752	1.3672	1.11532	0.995162	1.23548	0.405924	1.00672	0.514524	2.08295	-0.45831	0.274205	1.72248	0.0798062	0.738082	0.142487	0.812322	-0.338151	0.0223275	-0.217991	0.394365	-0.45831	0.440284	1.00672	-0.338151	-0.217991	0.646243	0.738082	-0.45831	0.142487	0.932481	0.199966	0.0798062	0.320125	0.320125	0.440284	-0.0403532
		30	0.0790136	-0.161669	0.319241	0.0789226	-0.401897	0.0786494	0.319241	1.05203	0.920402	1.89278	2.99797	2.50559	1.30327	1.7729	1.65274	2.13356	0.822997	1.9048	1.05185	1.78455	0.199264	0.931779	0.702564	0.0790136	-0.0413279	0.800061	0.931779	0.0789226	0.439401	0.0788315	0.330436	-0.642489	-0.282011	0.942792	-0.402079	0.199082	0.822815	-0.0413279	-0.642489	-0.041692	0.450687	-0.281829	-0.522239	-0.0414189	-0.40217	-0.0415099	-0.281647
		31	0.178589	-0.302412	0.337341	0.337341	0.375842	-0.302412	-0.220663	0.632285	0.260339	0.709287	3.37244	1.52373	0.282729	1.34904	1.62804	1.58954	1.04273	1.80274	0.391784	1.68249	0.019838	0.791036	0.402979	0.457591	0.775094	0.856843	0.791036	0.895344	-0.220663	0.21709	-0.209468	-0.542913	-0.263911	0.56173	-0.422663	0.058339	1.08123	-0.0619114	-0.542913	-0.542913	1.02679	-0.0234105	-0.701665	-0.461164	0.0150905	-0.0234105	-0.0619114
		32	0.0933188	-0.0154428	0.62431	0.25207	0.290571	-0.0154428	0.0663067	0.0548179	0.919549	0.8763	3.29954	1.57079	-0.0424548	1.14381	1.05057	1.38431	-0.0269316	1.10531	-0.185683	0.612821	0.679048	0.95805	-0.294445	0.744561	1.80654	1.14381	0.95805	0.810074	0.438547	0.50406	-0.786935	-0.628184	0.0230582	-0.507933	-0.135693	0.345309	0.0115693	0.225058	-0.628184	-0.255944	0.449323	0.263559	-0.786935	-0.174194	1.04654	0.263559	-0.147182
		33	0.120492	0.0644331	0.628968	0.399494	0.392963	0.492732	-0.0718023	-0.444042	0.443204	0.572909	3.01099	0.95168	0.443204	0.765203	0.386432	0.765203	-0.0222743	0.628968	-0.301276	0.399494	0.300438	0.57944	0.356497	0.9145	1.50315	1.1935	1.00774	1.10026	0.443204	1.05727	-1.01511	-0.307807	0.343435	-0.450573	0.2072	0.492732	-0.171572	0.2072	-0.0222743	-0.0783333	0.814731	1.05727	-0.301276	-0.0718023	1.50968	0.486201	-0.307807
		34	0.353653	0.0639819	0.583127	0.587266	0.184927	0.8427	0.557167	0.0681207	0.838561	0.527068	3.29621	1.88568	1.07217	0.79078	0.133007	1.1412	0.678112	0.81674	0.561306	0.353653	0.578988	0.812601	0.985466	1.33589	0.665696	1.10227	1.35771	0.49642	0.955367	1.01143	-0.736557	0.626192	0.414401	-0.217412	0.323555	0.492281	-0.451025	0.323555	0.0940808	-0.0787845	0.0940808	0.777814	-0.139532	0.0899419	1.06803	0.0899419	-0.541871
		35	0.457152	0.449024	1.29506	1.01766	0.615317	0.573958	0.615317	0.171619	0.197579	-0.113914	2.56453	2.83381	1.73876	1.17582	0.890289	1.19935	0.781611	0.87489	0.991696	0.457152	0.264899	0.498511	2.02429	1.06714	-0.347526	0.833531	1.04362	1.2537	0.314386	1.39647	-0.633059	0.729691	0.145659	-0.113914	0.0548129	0.223539	-0.347526	0.0548129	0.524471	0.63315	0.197579	0.509072	-0.0360334	-0.1788	0.708597	-0.1788	-0.438372
		36	0.13993	0.675965	1.41026	0.758366	0.351901	0.256736	0.699492	0.197862	0.486577	0.13993	2.25144	3.38144	1.96983	1.54965	1.54965	1.10973	0.375428	0.468708	0.991036	0.0819982	0.812527	0.524754	1.79603	0.896814	0.0221807	0.489406	1.04708	1.37303	0.255793	1.08337	0.0221807	0.898699	0.256736	0.197862	0.25485	-0.32541	-0.267478	0.138987	0.755538	0.829061	0.25485	-0.267478	-0.0946256	0.137101	0.561044	-0.210489	-0.616954
		37	0.571396	0.768738	1.36481	1.0516	0.285024	0.476012	0.727999	0.247791	0.557929	0.571396	0.942533	2.9213	2.47525	1.15378	1.0584	0.458819	0.148901	0.380409	1.07208	0.322696	1.09607	0.0977616	1.63377	0.765671	0.782644	0.210338	0.980205	1.8045	0.0195699	1.03792	0.210338	-0.0383619	-0.287062	-0.0383619	0.135433	-0.232636	-0.174704	0.0195699	0.826889	0.731066	0.326202	0.111448	0.305723	0.346681	0.346243	0.285243	0.472506
		38	0.536729	0.080287	0.349466	1.1878	-0.0765349	0.441345	0.36644	0.710882	0.523262	0.536729	0.75184	1.92079	2.12854	1.9586	0.867704	0.0972603	1.60751	0.516608	0.710524	0.288029	1.23227	-0.263798	0.291535	1.22876	0.747977	1.17119	1.61416	1.6138	0.482661	0.847225	0.67343	0.424729	-0.321729	-0.073029	0.598524	-0.267303	-0.209372	-0.0150973	0.963088	-0.284277	0.291535	0.0767811	0.768814	1.30753	0.15555	0.250576	0.935597
		39	0.447794	0.0118141	-0.165453	1.31359	0.202583	0.488735	0.434293	0.700341	-0.301778	0.720445	0.645898	1.93417	2.04306	2.41843	1.32753	0.475234	1.88663	1.06838	0.856771	0.666002	0.972992	-0.00168751	0.107198	1.25914	0.952155	1.23904	1.87973	1.35453	0.686839	0.604957	0.604957	0.414188	-0.138013	-0.219896	0.277863	0.420791	0.14814	-0.0835701	1.28658	0.638999	0.107198	0.297967	0.564015	0.871005	0.318804	-0.11101	0.86367
		40	0.135184	0.565498	-0.29513	0.905593	0.271509	-0.0224788	-0.180141	0.181291	-0.431456	-0.180141	0.317617	1.51834	1.83367	1.99476	2.1752	0.838149	1.17681	1.04192	0.250172	0.838149	1.6299	0.250172	-0.0224788	1.33591	0.544161	1.10936	2.24264	0.747931	1.04192	0.181291	0.769268	0.47528	0.407835	-0.452793	0.0449657	0.0925098	0.113847	0.565498	1.4509	0.795475	-0.316467	-0.316467	0.632942	1.1307	0.769268	-0.137467	0.0663028
		41	0.102911	0.533225	-0.0835966	0.619368	0.483043	0.189055	0.0313919	-0.34874	-0.463729	0.0313919	-0.212415	0.49055	1.5373	0.71302	3.108	2.02491	0.870292	1.48711	0.217899	2.02491	1.34367	0.705512	0.432861	1.04968	0.511887	0.569187	1.21485	0.461706	0.755694	-0.34874	0.483043	0.676667	0.863175	-0.241259	0.246354	0.54785	1.0568	1.50845	1.40848	1.49462	0.382679	0.138873	0.590524	0.590524	0.239236	-0.16974	-0.463729
		42	0.6702	0.964188	-0.0732614	0.394047	0.567367	0.273378	0.49935	0.255544	0.202892	0.32603	-0.784376	0.376212	2.04225	0.15271	2.72102	2.8765	1.12794	1.12547	-0.490388	1.66326	1.15534	0.343865	0.517185	0.514715	-0.0230797	0.170545	0.444228	-0.246581	0.0474068	-0.784376	0.0474068	0.241032	0.291213	-0.54057	-0.0529567	-0.296763	0.658158	1.24613	0.291213	0.241032	-0.0529567	-0.296763	0.291213	0.464533	-0.0230797	0.49688	0.202892
		43	0.220553	0.220553	-0.22892	-0.0556001	0.11772	0.11772	0.63768	0.393873	0.455601	0.46436	-0.646046	0.220553	1.29861	0.699407	1.68339	3.76633	2.89973	0.675819	-0.237679	1.32799	0.11772	0.188206	0.361526	-0.22892	-0.0643592	0.831621	-0.299407	-0.40224	0.00612729	-0.646046	0.00612729	0.085373	-0.158433	-0.40224	0.085373	-0.158433	0.502499	0.502499	0.249934	0.085373	0.085373	-0.158433	-0.158433	0.0148865	-0.472726	0.0472334	0.0472334
		44	0.730364	0.163685	-0.340701	0.210404	-0.182954	-0.182954	1.09258	0.903684	0.965411	0.919257	0.0526573	0.163685	0.699218	0.965411	0.352578	4.00158	2.00162	1.15487	0.83881	0.429879	0.194831	0.399297	0.194831	-0.529594	0.0676658	0.853819	0.399297	-0.325128	0.272132	-0.325128	0.0832387	-0.136236	-0.325128	-0.702914	-0.702914	-0.514021	0.225977	0.0370843	0.0832387	0.24155	-0.702914	-0.136236	-0.136236	-0.151809	0.0370843	0.179258	0.557044
		45	-0.150566	-0.477199	-0.528352	0.0894801	-0.717245	-0.237152	0.518419	0.569573	0.97794	0.278373	0.518419	0.00289434	-0.528352	0.97794	-0.288306	4.10769	1.53406	1.27399	1.78467	0.308954	-0.0994128	0.518419	-0.0994128	-0.717245	0.120062	0.666168	0.0383266	-0.339459	0.97794	1.34087	1.02909	0.809619	-0.339459	-0.237152	-0.477199	-0.0482592	0.278373	0.0894801	0.0689081	0.467266	-0.237152	0.0894801	-0.150566	0.140634	0.0894801	-0.0482592	-0.150566
		46	-0.0734493	-0.400081	-0.451235	0.166597	-0.640128	-0.160035	0.595536	0.64669	0.64669	0.35549	0.595536	0.0800114	-0.451235	0.64669	-0.211189	2.55134	1.68652	1.35111	1.45342	-0.0222957	-0.0222957	0.595536	1.68652	-0.640128	-0.211189	-0.0734493	0.115444	-0.262342	0.64669	1.41798	0.697844	0.886736	-0.262342	-0.160035	1.30874	0.0288578	0.35549	0.166597	-0.262342	0.544383	-0.160035	0.166597	-0.0734493	0.217751	0.166597	0.0288578	-0.0734493
		47	0.0837633	-0.364796	0.0837633	-0.364796	-0.604843	-0.12475	0.219553	0.115296	0.459599	-0.0204934	-0.12475	0.115296	-0.604843	0.459599	-0.364796	1.41979	2.72124	0.563856	0.699646	-0.0204934	0.32381	-0.12475	2.03263	-0.604843	-0.364796	-0.604843	-0.604843	-0.26054	0.459599	1.07548	0.355343	0.699646	-0.26054	0.219553	1.68833	-0.12475	-0.364796	-0.0204934	-0.604843	-0.364796	-0.12475	-0.0204934	0.0837633	1.25246	0.32381	-0.12475	-0.604843
		48	0.625568	-0.521077	0.625568	-0.0630379	-0.0630379	-0.521077	-0.176774	-0.0630379	-0.176774	-0.176774	-0.0630379	-0.521077	-0.521077	-0.176774	-0.521077	-0.176774	3.48103	0.167529	0.281265	0.281265	1.08361	-0.521077	2.33439	-0.521077	-0.0630379	-0.0630379	-0.0630379	-0.176774	0.281265	-0.521077	-0.0630379	0.739304	-0.176774	0.281265	1.53205	-0.521077	-0.521077	0.281265	-0.0630379	-0.521077	-0.521077	0.281265	0.167529	1.77221	0.167529	0.395001	0.395001
		49	0.693916	-0.180336	0.830112	0.277702	0.277702	-0.452729	-0.108426	0.00530989	-0.380818	-0.108426	0.277702	-0.180336	-0.316533	0.163967	0.0920562	0.163967	2.93013	0.50827	0.758202	1.03059	1.15195	-0.180336	0.421523	-0.316533	0.00530989	-0.403279	-0.130886	0.300163	0.758202	-0.0441401	0.141506	1.48863	-0.244622	0.622006	-0.244622	-0.180336	-0.452729	0.213417	0.00530989	0.228252	-0.180336	-0.0589759	0.50827	1.56817	0.644466	0.327152	0.327152
		50	0.846527	-0.208688	0.113155	0.684135	0.466743	-0.263688	0.171096	0.411743	-0.753473	0.171096	0.684135	-0.208688	0.0899001	0.226096	0.063705	0.443488	2.82892	0.878272	1.03772	1.31012	1.30457	0.226096	0.13935	-0.344884	0.629135	-0.214238	0.0581544	0.579685	0.385548	0.144901	0.113155	1.11598	-0.399884	0.249351	-0.617276	-0.208688	-0.263688	-0.159238	0.194351	0.199901	-0.208688	-0.43163	-0.208688	0.162605	0.144901	0.516193	0.298801
		51	0.435836	-0.16134	-0.297536	0.478813	0.261421	-0.0109714	0.629181	0.411789	-0.500756	0.423812	0.273444	0.0440292	0.342617	0.684182	0.316422	1.10694	3.39777	2.15783	1.65388	2.33701	0.641204	0.478813	-0.065972	-0.297536	0.218444	-0.624929	-0.147168	0.627032	-0.0251434	0.192249	-0.297536	0.247249	0.26357	0.660136	0.456916	0.660136	0.810504	-0.159191	0.399766	0.657987	0.865505	-0.431583	0.454767	-0.500756	0.192249	-0.352537	-0.569929
		52	0.245282	-0.624286	-0.624286	0.0158666	0.200564	-0.201525	0.438627	0.221235	-0.418917	0.635348	-0.189502	-0.0168277	0.417956	1.02541	-0.0168277	0.643996	2.51974	2.49907	2.261	1.46547	0.450651	0.417956	0.820046	-0.222197	0.832069	-0.00480457	0.200564	0.832069	-0.624286	-0.406894	-0.222197	0.179893	1.41548	1.00137	1.20674	0.599279	1.82622	0.99272	0.209212	-0.213548	0.402558	0.188541	-0.00817959	-0.418917	-0.00480457	-0.406894	-0.624286
		53	-0.449323	-0.449323	-0.449323	-0.243955	0.158135	-0.243955	-0.0385857	-0.0385857	-0.243955	0.158135	-0.449323	0.158135	0.158135	0.765594	0.158135	0.166783	1.39035	1.58707	3.19349	2.39796	-0.243955	0.158135	0.560225	1.36247	0.354856	1.36247	0.158135	0.354856	-0.449323	-0.449323	-0.0472338	0.354856	1.37305	1.17633	2.79141	0.774242	1.78379	1.16768	0.166783	-0.0385857	0.577521	0.363504	0.166783	-0.243955	-0.0472338	-0.449323	-0.449323
		54	0.301714	0.112132	0.159528	-0.124845	0.609013	-0.219636	-0.0774496	0.538691	0.538691	0.703803	0.0173413	0.514222	0.703803	1.0585	0.561617	0.301714	0.656408	1.15329	3.29685	1.47444	0.206923	0.561617	1.0111	1.92393	0.72673	1.63955	0.466826	0.537148	-0.124845	-0.17224	0.182454	0.774125	0.986633	0.584543	2.23123	0.372035	1.03403	1.3184	-0.0300542	-0.314427	-0.267031	0.466826	-0.17224	-0.361822	0.087663	-0.456613	-0.361822
		55	0.485147	0.188279	0.235674	0.326806	0.712218	0.60752	0.749707	0.990342	0.990342	0.699722	0.468993	0.67107	0.646078	0.70597	0.772109	0.753365	1.02783	0.961691	2.70316	2.46253	0.980436	0.718466	1.19501	2.02713	0.374202	1.68912	0.24817	0.077333	0.434093	0.225767	0.339303	0.475241	0.232016	0.285659	2.09327	0.636171	0.762203	0.778358	0.367954	0.137225	0.345551	0.516388	0.279411	0.25076	0.298155	-0.487753	-0.339319
		56	0.38804	0.0911712	0.138567	0.229699	0.61511	0.947632	0.652599	0.893235	0.893235	0.602614	0.371885	0.573963	0.548971	0.608862	0.675002	0.656258	0.930724	0.864584	1.19635	0.955716	2.19498	1.93301	1.97234	0.957538	1.15153	1.05674	0.588281	-0.0197744	0.774205	0.12866	0.242195	1.25257	0.134908	0.62577	0.586459	0.539064	0.665096	1.11847	0.708065	0.477336	0.248443	1.29372	0.182304	1.02809	0.638267	-0.584861	-0.436426
		57	0.380619	0.273332	-0.0131626	-0.115149	-0.0615052	0.888571	0.928843	0.45784	0.171346	0.308699	0.171346	0.469629	-0.222436	0.362342	0.427775	0.553339	1.16169	0.332277	0.523273	0.80328	2.56885	1.49479	1.86871	0.471212	1.33228	1.42778	0.817838	0.446052	0.524855	-0.168792	0.183135	0.90843	0.45784	0.948703	0.481418	0.194924	0.463141	1.10963	0.841415	0.608564	0.618771	0.854787	0.266844	0.729223	0.578499	-0.311446	-0.257803
		58	0.248791	0.357602	-0.146513	-0.624004	-0.188764	0.765881	0.806154	0.710655	-0.119889	0.397537	0.206541	0.0711069	-0.188764	0.179917	0.0844188	0.479723	0.439788	-0.0110794	0.179917	0.0844188	2.93504	1.4227	1.80271	0.452763	1.47628	1.46297	1.01244	0.262103	0.126333	-0.297574	-0.324198	0.672361	0.493035	0.930254	0.193229	-0.310886	0.0155443	0.386204	0.930254	0.317329	0.166605	1.1076	-0.0243912	0.494677	0.235143	0.0977306	0.0977306
		59	0.925454	0.785948	0.0335181	-0.195657	0.239583	0.757009	1.48282	0.890687	-0.188174	0.329253	0.883203	0.251138	-0.257048	0.359948	0.26445	0.90807	1.11645	0.168952	0.608264	0.512765	2.30005	1.78097	1.10831	0.692206	1.27851	0.768565	0.506937	0.442135	0.365776	-0.117543	-0.144166	-0.0220446	1.41801	0.673066	0.37326	-0.130855	0.692206	1.12228	0.673066	-0.188174	1.09158	0.413196	0.15564	0.296902	0.474586	0.277762	1.02271
		60	0.305676	0.166171	-0.299765	-0.0514495	0.383791	0.710221	0.958536	0.461905	-0.33046	-0.00403021	0.740916	-0.0821449	-0.11284	0.0266652	0.0266652	0.383791	0.305676	0.0266652	0.274981	0.274981	1.39378	4.45463	2.49316	0.740916	1.75654	0.244285	-0.11284	-0.0821449	0.414486	0.0266652	-0.190955	0.0266652	0.989232	0.244285	0.135475	-0.0821449	0.740916	0.693497	0.244285	-0.33046	0.662801	0.461905	-0.0821449	0.632106	0.523296	0.135475	0.880422
		61	0.537711	0.0218648	0.0410806	0.556927	-0.111901	0.289396	0.537711	0.308612	-0.0734692	-0.474766	0.671477	-0.092685	-0.474766	-0.226451	0.0410806	0.15563	0.805243	0.442377	0.824459	0.289396	0.805243	5.18779	1.98848	1.47407	1.71206	0.0410806	-0.608532	0.174846	0.537711	0.0410806	-0.360216	-0.092685	0.518496	-0.092685	0.0410806	-0.092685	0.136415	0.766811	-0.092685	-0.608532	0.38473	-0.226451	0.0410806	0.671477	0.537711	0.308612	0.786027
		62	0.301359	0.311531	0.3569	0.291187	0.177765	-0.0318845	0.301359	0.346728	0.212962	0.0893683	0.546206	0.334215	0.200449	-0.243875	0.301359	-0.16565	0.402269	0.424953	0.836422	0.190278	0.56889	4.01371	2.69308	1.12664	1.47571	0.0791967	-0.377641	0.490665	0.301359	0.245818	0.122224	0.611918	0.422612	0.334215	0.41244	0.167593	-0.211019	0.144909	0.112053	-0.377641	-0.3221	-0.188335	0.41244	0.601746	0.41244	0.069025	-0.309587
		63	0.000599593	0.0107712	0.233191	1.05273	-0.122994	0.55261	0.17765	0.40007	0.266305	0.319761	0.245446	0.741659	0.0767409	-0.367584	0.531752	0.0647429	0.455611	0.655346	1.06681	0.420671	0.622232	1.52365	1.9951	1.53408	0.976334	-0.0445119	0.560955	1.07516	0.17765	-0.054941	-0.00148417	0.842311	0.475954	1.44986	0.819884	0.220936	0.019374	0.375302	0.165395	-0.501349	-0.62286	-0.312043	0.465782	0.655089	0.465782	0.122367	0.0978564
		64	0.298743	-0.00386933	-0.0489808	0.793187	-0.00386933	0.270438	-0.104521	-0.149633	-0.149633	0.305121	-0.170491	0.88341	0.352258	0.198091	0.24958	-0.0836633	0.486223	-0.0281227	0.829895	0.428657	0.943002	0.885436	2.73979	2.0565	1.00695	0.253631	0.970238	0.94938	-0.104521	-0.337113	0.407798	1.27422	1.04163	1.88177	0.537712	0.362687	0.138499	0.360661	0.0169888	-0.382224	0.0765806	1.1241	0.473768	0.819466	0.183611	-0.427336	-0.184315
		65	-0.0966496	-0.676965	-0.499914	0.675498	-0.676965	0.208289	-0.499914	-0.322863	-0.322863	-0.145812	-0.676965	0.321396	-0.209756	0.0804012	-0.145812	-0.145812	0.71684	-0.145812	0.434503	0.144345	0.54761	1.81267	2.81885	1.77218	2.44911	0.539789	0.852548	1.41722	0.418862	-0.676965	0.249632	0.893891	0.257452	2.23853	0.0312385	0.426682	-0.145812	-0.145812	-0.322863	-0.499914	0.822126	0.950874	0.426682	0.71684	-0.322863	-0.322863	0.0312385
		66	0.231286	-0.147601	-0.349029	-0.209943	-0.449743	-0.349029	-0.399386	-0.197958	-0.651171	-0.197958	-0.298672	-0.00851444	-0.2603	0.281643	-0.298672	-0.550457	0.791388	-0.600814	0.180929	0.192914	0.521444	1.86124	1.93181	1.54299	2.82419	1.09353	-0.00851444	1.01098	0.821532	0.355969	1.0048	0.992816	0.734857	1.40185	-0.0972439	0.652302	0.255255	-0.298672	-0.248315	-0.449743	1.20042	1.00104	0.551588	1.09353	-0.349029	-0.298672	-0.0468868
		67	-0.353463	-0.0499378	-0.557658	-0.708729	-0.556275	-0.149269	-0.199626	-0.100295	-0.553508	0.205997	-0.201009	-0.405204	-0.656989	-0.405204	-0.303106	-0.452794	0.308736	-0.605249	-0.40382	-0.203776	-0.149269	1.37858	1.78771	0.308095	3.9751	0.815073	0.411575	1.22687	1.53178	0.964119	1.0165	0.510164	0.558497	0.817098	0.000419227	0.766099	0.659211	-0.303106	-0.0485545	-0.556275	0.921962	-0.35208	0.86958	0.712976	0.157024	-0.201009	0.0507763
		68	-0.525946	-0.0889105	-0.730141	-0.614192	-0.595248	-0.321752	-0.372109	-0.00575736	-0.592481	0.434045	-0.106471	-0.310666	-0.562451	-0.444176	-0.475589	-0.491767	-0.0561144	-0.644221	-0.576303	-0.109238	0.212289	0.361977	1.63103	0.936673	3.96772	1.25128	1.17366	1.07018	1.37509	1.32568	1.3192	0.545844	0.786544	0.793921	0.361977	0.534759	1.28779	0.0584516	0.580024	-0.595248	0.231234	-0.257543	0.90526	0.348125	0.652092	-0.239982	0.145314
		69	-0.34753	-0.111922	-0.987133	-1.01038	-0.606389	-0.288471	-0.72388	0.0215881	-0.257058	0.461391	-0.123548	-0.0374704	-0.0374704	-0.316117	-1.07321	-0.257058	-0.268684	0.221389	-0.637802	-0.182607	0.390706	0.578881	1.75315	1.25429	3.97132	1.02684	1.30172	0.807256	1.592	0.799096	0.893334	0.276983	0.461391	0.865688	0.143472	1.04194	1.00706	-0.103761	1.23827	-0.896662	0.794702	0.311861	0.497197	-0.0214507	0.540236	-0.257058	0.0215881
		70	0.352902	-0.254178	-0.823097	-0.846349	-0.544451	-0.532825	-0.968233	-0.120668	-0.399315	0.0128421	-0.265804	0.0244681	0.0244681	-0.254178	-0.743074	-0.0290192	-0.0406451	0.551526	-0.677961	-0.120668	0.516648	1.17722	1.06231	1.07394	3.3064	0.680393	1.28747	0.997201	1.20745	0.516648	0.917178	0.505022	0.753433	1.56612	0.371512	0.593387	0.928804	-0.14392	1.73451	-0.834723	0.448251	0.169604	0.214749	0.474786	1.10048	-0.0290192	0.249627
		71	0.520819	-0.219772	-0.655181	-0.945453	-0.510045	-0.364908	-0.800317	-0.219772	-0.364908	-0.219772	-0.364908	-0.074636	-0.074636	-0.219772	-0.575158	0.00538705	0.408229	0.585932	-0.510045	-0.219772	0.150523	1.90705	1.39162	0.440796	3.11559	0.328206	0.520819	1.3265	1.53675	0.150523	0.698501	0.553365	0.520819	1.76191	0.00538705	0.908751	0.295659	-0.510045	1.10136	-0.800317	1.31159	0.0705002	0.263093	0.92366	0.600842	0.00538705	0.150523
		72	0.751344	0.010753	-0.516857	-0.516857	-0.516857	-0.516857	-0.516857	-0.516857	-0.516857	0.010753	-0.516857	0.010753	0.538363	0.010753	-0.146562	-0.146562	0.401416	0.381048	0.010753	-0.516857	-0.146562	1.8473	2.00461	-0.146562	3.82079	0.558731	1.27895	1.31969	0.949394	-0.146562	0.401416	0.929026	1.80656	1.8473	0.381048	0.031121	-0.146562	0.538363	0.751344	-0.516857	0.579099	0.010753	0.401416	0.771712	0.594029	-0.146562	-0.146562
		73	0.0171068	0.0171068	-0.510503	-0.218721	-0.510503	-0.510503	-0.510503	-0.218721	-0.510503	0.0171068	-0.510503	0.308889	0.544717	0.0171068	-0.510503	0.0730617	0.329257	0.308889	0.308889	0.0730617	0.364844	1.40485	2.51602	0.0730617	4.46696	0.856867	1.42006	1.4608	1.4608	-0.218721	1.2046	0.856867	1.36411	2.28019	0.0171068	0.62104	-0.510503	0.836499	0.0171068	-0.218721	0.585453	0.600672	0.0374748	0.329257	-0.510503	-0.218721	-0.510503
		74	0.265821	-0.0054332	-0.533043	0.0299936	0.28072	-0.261789	-0.261789	0.0299936	-0.533043	-0.0054332	-0.533043	0.286349	0.522177	-0.0054332	-0.261789	0.0505217	-0.241261	0.286349	0.286349	0.0505217	0.613558	0.286349	1.66878	0.321776	4.42801	0.286349	1.39752	0.613558	0.613558	-0.241261	0.634087	0.286349	1.61282	1.1617	-0.0054332	0.0505217	-0.261789	0.813959	-0.0054332	0.301248	0.28072	1.9344	1.09448	0.843756	0.28072	-0.241261	-0.533043
		75	-0.369324	-0.640578	-0.640578	0.116005	0.366731	-0.175778	-0.175778	0.503097	-0.447032	-0.447032	-0.640578	-0.155249	-0.447032	-0.640578	0.0177684	0.910717	0.231843	0.425389	0.231843	0.910717	1.08666	0.231843	0.69957	0.988425	4.28601	-0.348795	0.428315	0.69957	1.08666	1.00603	0.526552	-0.155249	0.116005	1.10719	0.327152	0.330079	-0.175778	0.231843	-0.447032	0.387259	0.560277	1.4928	1.56759	1.8975	0.173185	0.0382966	-0.447032
		76	0.975918	-0.57329	-0.147305	-0.108489	0.860004	-0.108489	-0.108489	0.278603	0.0462408	0.0462408	-0.57329	-0.379744	-0.379744	-0.57329	0.511041	0.820425	0.00734841	0.626879	0.00734841	0.39444	1.13057	0.433333	0.317495	0.472149	3.02859	1.13065	0.0462408	-0.108489	0.704587	0.781532	-0.147305	0.89821	1.16946	0.00734841	0.39444	-0.186198	0.317495	0.859317	0.0462408	0.588749	0.627565	1.8285	1.63487	1.673	0.240473	0.665771	-0.379744
		77	1.09992	-0.178038	0.247946	0.015508	0.331957	-0.203562	-0.313098	-0.035541	0.00335137	0.222422	-0.287573	0.015508	0.015508	-0.287573	0.306433	1.87289	0.293065	1.02213	0.293065	0.351551	0.816428	0.609514	0.112887	0.596146	1.68678	1.08776	1.31777	0.125043	1.26673	1.39585	0.357482	1.84114	1.84114	1.16935	1.22783	0.428125	0.660563	1.58317	0.551028	0.222422	-0.0100165	0.867477	0.731206	0.983238	0.0410326	0.513346	-0.422633
		78	1.7393	0.345924	1.06048	0.634491	0.720087	-0.161714	0.0173181	-0.0345037	0.622335	0.668265	0.409529	0.519064	0.345924	0.351816	0.558729	1.83311	0.409529	0.598768	-0.109893	-0.553925	0.932892	0.26427	0.558729	0.519064	0.950941	1.55401	2.45618	0.859454	1.03691	0.680421	0.939157	1.99841	2.11384	0.93953	0.610924	0.738135	1.22183	1.35336	0.996871	0.552838	-0.104001	1.08247	0.385962	-0.0580708	-0.0121408	0.303935	-0.323071
		79	0.349316	0.233889	0.522456	0.522456	0.94915	-0.018055	0.160977	0.36485	1.10709	0.38594	0.297494	0.662724	1.00097	1.26256	0.787793	2.06218	0.808883	0.827831	0.0337667	-0.154572	0.224583	-0.018055	0.276404	0.407029	0.668615	-0.00627148	3.19663	1.00311	0.498889	0.824081	0.912526	1.11981	1.23524	0.827495	0.754584	1.90457	1.1952	1.66783	0.714545	0.526207	-0.216036	0.885545	1.2967	0.0855885	0.387213	-0.14868	-0.435106
		80	0.238206	-0.344739	0.22434	0.317843	0.854072	0.276913	0.28497	0.972392	1.52763	0.587404	0.202416	0.832125	1.07687	1.44799	0.818282	1.48086	0.900812	0.810225	-0.154815	-0.108051	0.832125	0.183409	0.867915	0.669934	0.760545	0.133753	2.86377	1.24999	-0.143865	0.680908	0.691881	0.554531	0.576454	-0.424376	-0.0751778	1.48089	0.771518	1.22811	0.119886	0.634168	-0.201579	1.05495	0.856989	0.25499	0.0570327	0.194383	0.0789322
		81	-0.428245	-0.638988	-0.615252	-0.264974	0.245335	0.271231	-0.00927968	0.363654	0.944811	-0.0790472	-0.521749	0.364735	0.78262	0.78154	0.408606	0.78262	0.433422	0.432342	0.410766	0.316182	0.621509	0.434502	1.22856	-0.0542309	0.434502	0.667541	1.76153	1.57884	-0.00819945	0.0144564	0.339918	0.946971	0.853468	-0.545485	0.0604878	1.78382	0.503189	1.87733	0.223759	0.0831437	-0.00819945	0.876123	0.594533	0.364735	0.596693	-0.0103599	0.0155366
		82	0.0540571	-0.156686	-0.275863	-0.21141	0.246379	0.593114	0.217328	0.715669	0.451973	0.242836	0.00819108	0.44843	0.307288	-0.092399	-0.304914	0.354926	0.451973	-0.185903	0.494461	0.0965453	0.609929	0.422922	1.31226	0.666259	1.04221	0.989424	1.06063	2.52001	1.14103	0.622165	0.882483	0.917885	0.872019	0.413193	0.525284	0.940014	0.188277	0.98588	0.307454	-0.327044	0.093002	0.686618	0.0540571	0.496067	0.519969	-0.56346	0.164376
		83	-0.21809	0.407026	0.0810072	-0.021712	0.215072	0.354965	0.480695	0.457684	0.0863224	-0.0491463	0.124221	0.264114	0.0691393	-0.330548	-0.021712	0.190445	0.749337	-0.0358749	0.777663	0.178577	0.646618	0.720286	1.18177	0.535776	1.33957	1.19896	0.649638	2.5907	1.77274	0.605021	0.831341	0.773239	0.747208	0.441392	0.459979	1.35072	-0.137703	0.934738	0.409321	-0.378186	0.135364	0.428633	0.150252	0.0907462	0.395158	-0.44743	0.368236
		84	0.0754602	0.700964	0.168827	-0.0878018	0.508622	0.546038	0.51747	0.545504	0.38026	0.090106	0.469203	0.506619	0.260212	0.065867	0.477956	0.330086	1.30044	0.56627	0.455187	0.0614432	0.375186	0.294557	0.34536	0.880759	1.22244	0.516841	0.995009	2.78332	2.06706	1.46433	1.17671	0.656493	0.476165	0.992493	0.394277	0.771467	-0.203404	0.40692	-0.0160201	-0.0846357	0.0182294	0.825436	0.906695	1.05331	0.740917	0.309013	0.919337
		85	0.119928	0.929994	0.356207	0.477685	0.636389	0.864354	0.100532	-0.0679723	0.192528	-0.145264	0.558315	0.786281	0.679792	0.259236	1.22801	0.425185	1.02042	1.03648	0.550286	0.573304	0.657842	0.39265	0.532741	0.963882	1.34721	0.835158	1.40561	2.66691	1.90601	1.49682	0.557247	1.16237	0.380714	0.191461	0.385119	0.771291	0.0346078	0.177539	0.263641	0.433214	0.536079	0.86691	0.858881	0.823926	0.925303	0.600651	1.02042
		86	0.518248	0.893554	-0.0859967	0.241988	0.887373	0.842413	-0.00957582	-0.163582	0.325172	-0.0862879	0.462705	1.01552	1.1892	0.56939	1.45724	1.19302	1.22067	0.852706	0.580265	0.897957	0.333978	-0.0713013	0.282545	0.780105	0.816842	0.872386	1.55393	3.51685	2.22459	1.98448	1.00024	1.53894	0.565278	1.06196	0.989947	0.447427	0.513846	0.222016	0.396285	0.411272	0.447718	0.837719	0.490345	0.742814	0.910611	0.637879	0.423635
		87	1.12899	0.690489	-0.104491	0.39895	0.94147	0.742212	0.0445214	0.0962452	-0.156214	-0.156214	1.02201	0.863884	0.810682	0.242301	1.04845	1.7009	0.760437	0.876529	0.480065	0.570868	0.717829	0.466847	0.439507	1.33941	1.60304	0.875051	1.57775	4.05792	2.321	1.75114	1.30238	1.51133	0.135324	1.15838	0.611425	0.0689051	0.135324	-0.207938	0.120629	0.465369	0.677271	0.253467	-0.196772	-0.407195	0.120629	-0.0492378	-0.314914
		88	0.682546	-0.0642207	-0.427229	0.107636	0.249608	-0.197059	0.306893	-0.197059	-0.541799	-0.418095	0.730697	0.325161	0.550791	-0.0195798	0.325161	1.59415	0.838246	0.585214	0.249608	-0.399827	0.6425	0.452376	0.240474	1.23465	1.43742	0.678007	1.28842	3.80002	2.40279	1.30669	0.700813	1.222	0.275981	1.32847	0.227829	0.0858573	0.399686	-0.285257	-0.0469811	0.545169	0.509661	0.209562	-0.303524	-0.237105	-0.0469811	-0.218837	-0.237105
		89	0.54518	-0.135167	-0.166079	0.235946	0.112242	-0.511647	-0.140533	0.241312	-0.789968	-0.666264	0.416109	-0.0114628	-0.29515	-0.666264	-0.0114628	0.792589	-0.140533	0.514268	-0.264238	-0.537193	1.01445	0.514268	-0.140533	1.54018	1.94221	0.98354	0.885381	2.40069	2.28778	1.01445	0.297771	0.885381	0.957993	0.416109	-0.418854	0.457809	1.0817	-0.289784	-0.29515	0.98354	0.637972	0.581514	0.334105	0.710584	0.0813297	-0.666264	-0.0423749
		90	-0.390511	-0.346465	-0.0990559	0.108524	-0.266807	-0.80682	-0.267955	-0.221612	-0.722945	-0.59924	-0.351831	-0.0550095	-0.228126	-0.515365	-0.0550095	0.1924	-0.435706	0.360151	-0.559411	-0.386294	0.860335	-0.143102	-0.267955	0.772242	1.0637	0.856117	0.311887	1.1066	2.69409	1.27971	0.704087	1.57002	1.7799	0.822426	-0.100204	0.860335	1.73585	0.364368	0.526753	1.611	0.735482	0.648537	0.485004	1.02923	0.148353	-0.515365	0.360151
		91	0.0487021	-0.132788	0.100039	-0.281739	-0.184125	-0.593143	-0.308978	-0.240762	-0.742094	-0.625681	-0.392854	0.151377	-0.742094	-0.658219	0.500618	-0.197864	-0.243902	0.901196	-0.243902	0.533156	0.695607	-0.184125	0.27309	0.360105	0.64427	0.327567	-0.216663	0.570754	3.3078	1.34781	1.62354	1.50712	1.72429	1.24706	0.0916	0.812021	1.55654	0.803582	0.711267	1.31527	0.570754	0.476519	0.443981	0.871798	-0.0163741	-0.541805	0.0863007
		92	0.187559	0.325017	0.441863	-0.200873	0.0707127	0.096165	0.293344	-0.188432	0.0631941	-0.0233587	0.412435	0.609181	-0.284748	-0.0848921	0.871436	-0.203983	0.30043	1.09804	0.242439	0.758998	0.573966	0.0997079	0.730436	0.267459	0.580619	0.234921	0.183151	0.738606	3.04165	1.08119	1.87837	1.501	1.0232	1.96536	0.751913	0.690379	1.11641	1.23239	1.34258	1.07765	0.680616	0.122916	-0.141584	0.11272	-0.0514884	-0.345416	0.0511863
		93	0.383596	0.996663	0.598821	0.129554	0.00940559	0.336999	0.237755	0.477496	0.348824	0.133599	0.312049	0.72706	-0.256462	0.374207	0.603299	-0.343448	0.412591	0.790827	0.225929	0.832081	0.91011	0.167073	0.803518	0.295745	0.955842	0.565348	0.295312	0.694452	2.02435	1.51265	0.861076	0.612378	0.553955	1.33408	0.528572	0.511835	0.557567	0.673548	0.873335	0.00983835	0.636462	0.66589	0.188843	-0.239293	-0.151874	-0.401006	0.00131456
		94	0.124264	0.98896	0.553514	0.257067	-0.212323	0.524519	0.308861	0.702621	0.866783	0.827979	0.480767	0.798167	0.163885	1.08739	0.422776	0.467345	0.543705	0.5727	-0.0334035	0.632756	1.37166	0.140568	0.780615	0.562074	1.00815	0.557644	0.482832	1.25362	0.991324	2.13182	1.0522	0.334243	1.07551	1.03714	0.659686	0.954586	0.493458	1.29272	0.985646	0.647812	1.19563	0.230137	0.162337	0.14345	-0.080768	0.68382	0.500471
		95	0.028864	0.0831437	0.746617	-0.0260774	-0.177969	0.746617	0.37221	0.317269	-0.0100379	0.154125	-0.15032	0.38382	0.126476	0.688264	0.095415	0.516922	0.665045	0.41931	-0.0998081	0.94184	1.40602	-0.345543	0.497471	0.075964	0.493041	0.317269	-0.119259	1.37496	0.793717	3.29409	1.82375	0.629554	1.0671	0.98451	-0.0721589	0.251736	-0.0216475	0.907368	0.282797	0.0609431	0.883487	0.496452	-0.0765889	0.193027	-0.00219656	0.415899	0.333308
		96	-0.00117447	-0.590255	0.587906	-0.442132	0.049337	0.587906	0.342172	-0.098786	0.230189	-0.00458585	0.475924	0.0964371	0.0964371	0.143537	0.194049	0.486883	0.635006	0.389272	-0.00117447	0.783129	0.732618	0.280701	0.86637	1.10115	-0.0516859	0.428824	-0.149297	1.35784	1.16262	3.16122	3.24787	1.925	1.83494	1.495	-0.102197	0.0930257	-0.0516859	1.40494	-0.00458585	0.815859	0.33876	-0.0482745	0.0349664	0.81927	0.0964371	0.91347	0.573536
		97	0.396825	-0.484666	0.888294	-0.108924	0.382545	1.0183	-0.00747727	0.136811	0.042944	-0.484666	0.158671	0.0068031	0.396825	-0.108924	-0.123204	-0.123204	0.382545	0.65684	0.0068031	0.238257	0.12253	-0.101344	0.548693	1.0763	0.411106	1.31446	0.281098	0.780148	0.910155	2.68072	3.74264	1.83537	0.932016	1.43776	-0.224651	-0.484666	-0.108924	0.534413	-0.874688	-0.217071	-0.628954	0.12253	0.042944	0.274398	-0.253212	-0.0870634	0.548693
		98	0.935006	0.25732	0.431595	0.0996639	0.459244	0.705434	-0.0746106	0.746907	1.07259	0.25732	0.439175	0.0415724	0.791174	0.17158	-0.160351	-0.160351	0.0996639	0.475862	-0.0303436	-0.43419	-0.160351	-0.0365879	0.613449	1.57256	1.19502	1.42114	0.705434	0.856846	0.914938	1.70256	3.51363	1.19291	0.822953	1.51446	0.373503	-0.10226	0.0996639	0.497266	-0.276534	-0.122328	-0.204618	-0.0884351	0.569182	0.596831	-0.0746106	0.223427	0.469617
		99	1.1159	0.438214	0.225321	0.280558	0.640138	0.49916	-0.0873007	1.12139	0.919462	1.01897	-0.294709	0.222466	0.972068	-0.0346943	0.407711	0.407711	0.86131	0.656756	0.15055	-0.0597125	0.0205428	-0.383304	-0.120435	0.698229	0.988747	1.07443	1.66066	0.122962	1.14897	0.634652	2.49886	0.75889	0.142211	1.22089	0.941565	0.0786343	0.86131	0.344134	-0.0956401	0.498876	-0.410892	0.286043	0.0288823	0.0565312	0.880619	-0.123289	0.122901
		100	0.707141	0.419477	-0.243749	0.0715032	0.431083	0.0207036	0.455529	0.852021	1.08166	0.819299	-0.123128	0.143419	0.322068	-0.183439	0.338051	0.518981	1.13474	0.349843	0.614296	0.543427	0.0715032	-0.253259	-0.519807	0.298857	0.380283	0.456576	1.1219	-0.0163952	1.06054	0.346514	1.5513	1.70512	1.09783	1.73556	1.1453	1.02486	1.61722	0.9285	0.758127	0.921084	0.503186	0.698865	0.311697	0.53905	1.36314	-0.192949	-0.15585
		101	0.343661	0.343661	0.432926	0.0149787	0.551722	-0.251569	0.719999	-0.120119	0.718175	0.206739	-0.51994	0.0149787	0.639163	-0.311879	0.281526	0.462457	1.07821	1.51064	0.557771	0.630734	-0.253393	-0.434324	-0.4325	-0.0453315	-0.51994	0.25622	1.65474	-0.4325	0.984723	-0.266046	1.50881	3.35003	1.64996	2.12457	0.944939	0.771881	1.29232	0.871975	0.557771	0.955768	0.230913	0.570424	-0.0851154	0.122946	1.09087	-0.374013	-0.193083
		102	0.260141	0.521813	0.474902	-0.330213	0.991546	-0.209593	1.35341	-0.658895	0.964415	-0.588369	-0.347128	0.0622948	0.424807	0.122605	0.203346	0.384277	0.152269	2.34297	0.474251	0.746138	-0.336913	-0.517844	0.13282	0.00198454	-0.216292	0.0418639	0.92772	0.525328	0.320451	-0.286818	1.2998	3.34528	1.50369	1.4603	0.997595	0.950033	1.1514	0.594872	0.997595	0.427672	0.927069	0.816664	0.548293	0.625518	0.756354	-0.719205	-0.407438
		103	0.353745	0.205614	1.03862	-0.176299	1.14546	-0.586101	0.735658	-0.854473	1.28689	-0.723637	-0.313834	0.216209	0.759652	0.216209	0.0680784	0.0680784	-0.176299	2.07471	0.495176	0.0680784	0.226804	-0.592801	-0.0627575	-0.193593	-0.592801	-0.0454628	1.84093	0.739553	0.353745	-0.313834	1.15216	3.70333	0.752952	1.71009	1.42832	-0.331129	0.340345	-0.324429	0.608717	0.340345	0.0680784	0.608717	0.340345	0.0680784	0.198914	-0.854473	-0.723637
		104	-0.167405	-0.022837	-0.0192738	0.15632	0.648637	-0.838879	0.531533	-0.253483	0.765742	-0.708043	-0.29824	-0.0365686	-0.29824	-0.0365686	0.693395	-0.184699	-0.136378	1.04115	0.242398	-0.184699	0.827794	0.00818923	-0.022837	-0.446371	-0.577207	-0.29824	0.783037	0.779473	-0.167405	-0.00554229	0.972362	3.57218	1.13422	1.5303	1.46824	1.14796	0.941336	-0.577207	0.648637	0.941336	0.107999	0.648637	0.648637	-0.184699	-0.0538633	-0.838879	-0.708043
		105	0.12466	0.137502	0.0146783	0.969948	0.417358	-0.545035	0.0403616	-0.0895845	0.794355	-0.545035	-0.135232	-0.00528614	-0.135232	-0.395124	0.33306	-0.934873	0.417358	0.417358	0.404516	-0.934873	0.730021	0.300254	0.00755549	-0.804927	-0.934873	-0.00528614	1.20416	0.287412	0.12466	0.547304	1.39259	3.07745	1.94518	1.30258	1.10702	1.17835	0.450164	-0.804927	0.287412	0.58011	-0.382283	-0.102426	0.287412	-0.545035	-0.674981	-0.545035	-0.285143
		106	0.153991	0.28863	-0.365794	0.711274	0.158684	0.182103	0.19149	0.349549	0.413883	-0.393906	0.182103	0.0240446	-0.393906	-0.653799	0.484188	-0.49574	0.158684	0.158684	-0.26396	-0.49574	0.0615439	0.739387	1.3107	-0.365794	-0.783745	-0.26396	0.125878	0.316743	-0.134014	0.86464	1.13392	2.74139	3.12653	0.512301	0.604748	1.61748	0.479495	0.210216	0.316743	0.897446	-0.231154	-0.3611	0.604748	1.04612	0.916172	0.182103	0.153991
		107	0.627961	0.115159	-0.246566	0.0677332	-0.192159	0.478702	-0.274679	-0.293992	0.710482	-0.0973076	0.123959	0.143272	-0.0973076	-0.3572	0.080064	-0.0217692	-0.192159	-0.0147872	0.0326384	-0.199141	-0.227254	0.805333	1.66935	0.285549	-0.487146	0.742125	0.954592	0.143272	0.162584	1.57803	1.08454	2.10661	3.31657	0.285549	0.78602	1.16008	0.368069	0.506815	0.498015	1.14076	0.659605	0.174915	0.78602	1.69746	1.21277	0.123959	0.450589
		108	0.248467	-0.159757	0.128248	-0.102605	-0.415304	0.593624	-0.0815825	0.107225	0.305619	0.0957892	0.473405	0.284597	0.0957892	0.721186	0.351336	1.10839	-0.415304	0.231116	0.564837	0.305619	-0.0605602	0.894887	1.91525	0.973061	0.252138	0.883451	0.862428	0.83182	0.173964	1.45946	1.01878	2.01445	3.53814	0.816712	0.927345	1.17146	0.79569	1.11615	0.248467	1.28209	0.982648	0.39338	1.00552	2.35961	1.69216	0.0825317	0.0710955
		109	0.260735	0.140516	0.0625324	0.353634	-0.270997	0.00595458	-0.0152593	-0.0364731	0.0839377	0.00614607	0.665567	0.140899	0.0841292	0.865493	0.339676	1.12066	-0.115031	0.141473	0.943093	0.317887	0.161729	1.06312	1.5314	1.53121	0.474428	1.33969	0.928751	1.15602	0.786169	1.57364	1.39703	1.31867	3.33419	1.45285	0.963541	1.41767	1.04191	1.17628	0.728634	1.16232	1.8288	0.61567	1.1197	1.37582	1.33224	-0.271189	0.161346
		110	-0.176538	0.0579857	-0.0199975	0.448476	0.0221904	-0.0556013	0.298902	0.45506	0.220728	-0.253756	1.1571	1.0501	0.419265	1.39897	0.299094	1.67511	0.574848	0.257289	1.47657	0.454677	-0.0981722	0.448476	0.916758	0.916566	0.214526	0.370301	0.335081	1.07349	0.724613	0.802597	1.00171	1.51838	3.99351	1.63158	1.71634	1.44001	1.19967	1.11472	0.291361	0.370301	0.682042	0.0219989	0.682425	0.761175	1.07234	-0.176347	-0.0985551
		111	-0.138414	-0.138414	-0.216397	0.0175522	-0.0960348	-0.252001	0.0243278	0.102311	0.0243278	-0.52833	0.726176	0.697348	0.14469	0.499002	-0.0536554	0.853315	1.27913	-0.329984	0.732952	0.258277	-0.216397	0.0175522	0.329485	0.407468	-0.216397	0.0175522	-0.174018	0.996025	0.371864	0.449847	1.15877	1.83179	5.24836	1.27883	1.36359	1.08726	1.51308	0.683797	0.329485	0.0175522	0.407468	-0.0180516	0.251502	0.0175522	0.641417	0.606109	-0.060431
		112	-0.0944385	0.302237	-0.411779	-0.0151035	-0.0547628	0.421247	0.619593	0.778263	0.143583	0.302237	0.302253	0.659285	0.341929	0.540274	0.222918	0.73862	1.16444	0.0245722	0.778279	0.302253	0.0642315	0.460907	-0.173774	0.222902	0.460907	-0.332444	0.0245722	0.807403	0.183242	0.262577	1.52143	1.9578	4.19787	1.65096	1.41298	0.89729	1.56111	0.579917	0.381572	0.381572	-0.332444	-0.213433	-0.253109	-0.173774	-0.332444	0.807403	-0.173774
		113	0.502546	0.655844	0.185206	0.0951268	-0.142878	0.0897548	0.576509	0.978556	0.100499	0.16909	0.0157918	0.0211639	-0.386255	-0.386255	-0.0635432	-0.386255	0.436251	0.179834	0.581881	0.0157918	-0.0689153	0.814514	-0.0635432	1.30664	0.814514	0.0211639	0.423211	1.16101	0.581881	0.417839	1.47835	2.29319	2.56802	2.42807	0.819886	0.259169	2.04981	0.491802	0.491802	0.248425	0.0211639	-0.301548	0.100499	0.423211	-0.222213	0.917633	-0.0635432
		114	0.736471	1.00539	0.419131	0.444673	0.206668	0.208058	0.926055	1.3281	0.334423	0.518636	0.365338	0.255088	0.194534	-0.383574	0.0547596	0.310156	0.194534	0.52938	0.815806	0.134095	0.280631	1.16406	0.286003	1.54056	1.04844	0.37071	1.004	0.68805	1.27829	0.651764	0.889769	1.93585	1.02815	3.58697	1.5163	0.608715	1.57685	0.841348	0.841348	0.713593	0.601953	0.16362	0.79691	0.425892	0.705441	0.329051	0.401625
		115	0.276629	0.148873	0.276629	0.0535677	0.497782	-0.421053	0.445016	0.540322	0.329394	0.106333	0.0535677	0.181323	-0.106637	-0.536674	0.266538	0.305127	0.189505	0.296945	0.276629	-0.0296043	0.106333	0.593087	0.0535677	0.763383	0.0332518	0.296945	1.06771	0.741159	1.18333	0.625537	0.181323	1.38608	0.875053	3.8039	1.77561	0.741159	1.32322	0.645853	0.793924	0.962312	0.972402	0.317261	0.64381	0.785742	1.07589	-0.210125	0.021118
		116	0.500418	0.334499	-0.484974	0.3418	0.926785	0.110557	0.208331	0.20103	0.796561	1.06025	0.0602598	-0.0553618	0.143432	-0.286605	0.695541	1.11828	0.439575	-0.0805104	0.0781073	-0.163682	0.637943	1.20102	0.764111	-0.484974	-0.344203	0.0602598	0.869186	0.363704	0.703268	0.670393	-0.0553618	0.738963	0.638368	3.19495	2.42171	0.504474	0.778713	1.21563	1.22293	1.21238	0.876487	0.183183	0.547895	0.727991	0.801042	0.218878	0.309351
		117	0.200962	0.532542	-0.784429	-0.073277	0.511707	-0.073277	0.406374	-0.214047	0.497105	1.2583	-0.354817	0.258303	0.110232	-0.354817	1.12483	0.356335	0.406374	0.117533	-0.221348	-0.347516	0.835986	0.785947	0.962154	-0.784429	-0.643659	-0.354817	0.222866	-0.0513737	-0.0586748	0.984058	-0.354817	0.208264	0.258303	1.97052	1.65977	1.92876	1.58988	2.02679	1.42097	0.681682	0.230167	-0.347516	0.399073	1.2729	-0.192144	-0.0805781	-0.221348
		118	0.732175	0.614046	-0.702925	-0.139844	0.000925879	-0.139844	0.641444	-0.280615	0.282466	0.895587	-0.421385	0.191736	0.641444	-0.421385	0.614046	0.141696	0.191736	0.0509654	-0.139844	-0.562155	0.473276	0.423237	1.795	-0.702925	-0.562155	-0.421385	0.309864	-0.562155	-0.421385	1.37269	0.478033	0.591405	1.09115	0.423237	1.15449	2.7671	1.67688	1.36794	1.06376	0.478033	0.169094	-0.562155	0.332506	0.614046	-0.702925	0.000925879	0.309864
		119	0.102641	-0.00348907	-0.0775251	-0.212296	-0.481838	-0.212296	1.12008	-0.212296	-0.347067	0.266053	-0.347067	0.805138	0.311449	-0.0775251	0.400824	-0.0775251	-0.00348907	0.266053	-0.0775251	-0.347067	0.131282	-0.751381	1.0307	-0.0775251	-0.212296	-0.61661	0.102641	-0.0775251	0.461559	1.0307	0.821892	-0.166901	1.56978	0.192017	0.506955	3.91959	2.13751	0.744403	0.580991	0.55235	0.506955	-0.61661	0.535595	1.07468	-0.212296	0.326788	-0.166901
		120	0.281613	-0.437638	0.101447	-0.316805	-0.0193858	-0.316805	0.402446	-0.0333243	-0.168095	-0.451576	-0.168095	0.65447	0.160781	-0.182034	-0.0333243	0.101447	-0.437638	-0.168095	-0.182034	-0.451576	-0.302867	-0.85589	0.31307	0.101447	-0.0333243	-0.437638	1.13206	-0.182034	0.924012	0.596551	1.00086	0.0120711	1.13564	0.937951	0.969407	2.54268	2.50764	0.831056	0.997284	1.0148	0.685927	0.412805	0.101447	0.640531	-0.0333243	0.50576	0.295552
		121	0.307373	-0.0890586	0.450026	-0.0951155	0.456083	0.539333	0.555096	0.315255	0.434263	0.0238926	0.307373	1.25683	-0.0672386	0.293435	0.315255	0.576916	-0.469727	-0.200185	0.0396556	-0.356776	-0.334956	-0.887979	-0.364658	0.323136	0.188365	0.164721	0.904036	-0.214124	1.39948	-0.0811771	0.576916	0.164721	0.584797	1.6672	1.37584	1.66902	3.16785	1.94097	1.65749	0.971523	0.965466	0.634494	0.703805	1.36978	0.569034	0.346781	-0.186247
		122	0.343241	0.126261	-0.0539201	-0.0138378	0.446541	0.440429	0.18665	0.396533	0.199859	0.0597603	0.343241	0.393249	0.282852	0.149851	0.216351	0.0729695	-0.164317	-0.254408	0.0762527	-0.0506369	-0.254408	-0.177527	-0.194019	-0.0907192	0.539914	0.28995	1.39036	-0.177527	1.16726	0.449824	0.973875	0.740402	0.576714	1.25407	1.27766	1.16726	3.11582	2.29179	1.64795	1.45784	0.867292	1.30027	0.920583	0.867292	0.560221	0.249336	0.479525
		123	0.394796	0.177815	-0.00236564	0.110305	0.214615	0.35368	0.521685	0.237195	0.673198	0.394796	0.183903	-0.260461	-0.159966	0.0631017	0.478798	-0.0863682	-0.534547	-0.624638	-0.0104965	0.284398	0.00803878	0.368401	0.141016	-0.250057	0.380577	0.341504	0.591469	0.368401	0.935339	1.34495	1.65811	0.581065	0.417376	0.527773	0.834844	0.935339	2.17175	2.26389	0.63817	1.6477	0.918846	0.290486	1.18303	0.707954	0.400884	0.511783	-0.174185
		124	0.0166953	-0.0733953	-0.253576	0.198761	-0.0570972	-0.192312	0.335861	0.198761	1.01932	0.335861	-0.0878083	-0.659063	-0.0715102	0.110556	0.972308	-0.145303	0.339631	-0.282402	-0.347595	0.393355	0.243886	0.817025	0.0166953	-0.374378	0.575422	-0.269874	0.679925	0.710636	0.663627	1.64618	2.13111	0.501629	0.910886	0.534225	0.395241	1.51474	1.79754	2.31522	0.689508	1.52726	0.81891	0.485331	0.890817	0.288852	0.427837	0.661742	-0.044727
		125	0.744353	-0.157399	-0.157399	0.205187	-0.231361	0.174645	0.161766	-0.516216	1.11549	-0.198935	-0.261903	-0.292445	-0.516216	-0.153629	1.69997	0.131225	0.526238	-0.366407	-0.250909	-0.231361	-0.20082	0.372659	-0.157399	-0.368292	0.311575	0.096913	-0.124973	0.26627	-0.231361	1.83313	1.50674	0.598315	0.73713	0.0896895	0.672276	1.1608	1.08307	3.2234	1.0563	1.62412	0.374544	0.131225	0.626971	0.385537	0.163651	-0.0528959	-0.579184
		126	0.979125	-0.0207425	0.0773723	0.454621	-0.0292946	0.602267	0.265718	-0.168666	0.830367	0.035837	-0.110584	0.135177	-0.201371	0.175877	1.56032	0.249839	0.82304	0.126625	0.340237	-0.192819	-0.275055	0.00407893	-0.0861524	-0.315087	0.757239	0.135455	-0.0210208	0.29015	-0.0619995	1.48597	1.30506	1.56726	1.44443	0.829698	1.47769	1.85344	1.1904	3.02511	1.86171	1.86227	0.83825	0.740413	0.814375	1.15825	0.609315	-0.192541	-0.315087
		127	1.26684	0.266968	0.365083	0.529555	0.823734	0.6772	0.570116	-0.429586	-0.0688847	0.00438203	0.0707387	0.316499	-0.462291	-0.297819	0.767458	-0.117469	0.030177	-0.134295	0.504872	-0.34735	-0.0937328	-0.363229	-0.134295	-0.363229	0.389931	0.193702	-0.28194	0.0292301	-0.21653	1.34813	0.741663	1.09356	1.32328	0.81493	1.44624	2.19121	1.17563	2.92064	2.7648	1.8475	0.929871	1.38066	0.553456	1.23318	0.700936	-0.134295	-0.363229
		128	0.341808	0.243693	0.163552	0.323834	0.802553	-0.0653824	0.368585	-0.09216	-0.09216	1.05483	-0.130792	-0.0653824	-0.303121	-0.321095	0.0206859	-0.49935	-0.532055	0.0206859	-0.059455	-0.190275	0.0654373	-0.208249	0.0206859	-0.56476	0.00595485	-0.190275	-0.303121	0.00595485	-0.059455	1.13821	1.0728	0.529234	1.65232	1.15026	0.523306	2.342	1.15026	1.45665	2.55908	2.17236	1.61962	1.71181	0.704247	1.38188	1.03417	0.0206859	-0.0299929
		129	0.516067	0.0457231	0.102639	0.223979	0.774346	0.337812	0.673665	-0.0549578	0.180214	0.993918	0.102639	0.572984	-0.468386	-0.29013	0.123298	-0.233214	-0.233214	0.123298	-0.29013	-0.29013	-0.367705	-0.111874	-0.347046	-0.703558	-0.29013	-0.0549578	-0.703558	0.180214	-0.525302	0.58049	1.05083	-0.29013	1.32977	0.559832	0.572984	2.05839	1.03018	1.00952	2.60876	3.09732	1.80012	1.72254	0.479809	1.22909	1.20843	-0.347046	-0.168791
		130	0.476408	0.11691	0.39552	-0.0373741	0.173826	0.519845	0.187305	0.0195422	0.254714	0.843412	-0.158714	0.311631	-0.172192	-0.326476	0.0869514	0.0629797	-0.26956	0.530338	-0.326476	0.00606337	-0.407364	-0.259067	-0.383393	-0.518211	-0.326476	-0.0913044	-0.296518	0.587254	-0.229109	0.540831	1.45456	0.338603	1.06511	0.295166	1.08756	1.34371	1.2089	0.298152	1.44407	3.60858	1.86799	0.567788	1.33024	1.18943	0.943766	-0.383393	0.349096
		131	0.383986	0.0244884	0.481354	-0.467062	0.10065	0.764689	0.273139	0.0861308	0.00328271	0.196977	0.245141	0.238455	0.0726519	-0.418898	-0.342736	-0.0101962	-0.342736	0.10065	-0.418898	-0.0863582	-0.16252	-0.211724	-0.65407	-0.114357	-0.418898	-0.0247158	-0.0516736	0.812853	-0.00351012	0.390672	1.14539	0.882222	0.736691	0.660529	1.80943	1.03455	1.57426	0.861016	1.80943	2.76464	2.33463	0.41763	1.33909	0.861016	0.812853	-0.49506	0.059173
		132	-0.057091	-0.106713	0.114981	-0.277326	-0.105254	0.163144	-0.328406	-0.280242	-0.437794	0.151541	0.841577	-0.598263	0.262387	-0.550099	-0.548641	-0.0556329	-0.548641	-0.265723	-0.389631	0.263845	-0.0585491	-0.503394	-0.710567	-0.170854	-0.550099	-0.230621	0.0522975	0.371776	0.100461	0.259471	0.864784	1.39289	1.01219	1.1712	1.45412	0.914405	1.77506	0.740876	1.61459	1.30817	1.97931	1.2603	1.93552	0.419939	0.211308	-0.0701526	0.965485
		133	0.178018	-0.0617774	-0.379086	-0.137833	-0.139646	-0.299403	0.0175498	-0.0614216	-0.0603192	0.0215333	1.13972	-0.458769	0.259515	-0.220432	-0.0603192	-0.0585054	-0.536282	-0.458769	0.0986908	0.102319	0.0179056	-0.0628797	0.015736	-0.221534	-0.220432	0.57501	0.17656	0.258057	-0.140393	0.49458	0.577179	1.21614	1.05713	1.21614	1.4523	1.21361	1.13862	0.81733	1.45412	0.577179	2.16767	2.2561	1.93371	1.28967	0.573552	-0.0577939	0.502938
		134	0.207388	-0.032407	-0.349716	0.0505478	0.048734	-0.128017	0.0469201	-0.191061	0.128061	0.192919	1.75415	-0.270389	0.430901	0.109964	0.429087	0.731926	-0.347902	0.0306371	0.429087	0.131689	-0.111734	-0.35153	0.346132	-0.510184	0.41099	0.746395	0.648971	0.270432	-0.429043	0.0469201	0.288529	0.609466	0.609466	0.609466	1.14666	1.22599	0.531952	0.670696	1.75052	0.890581	1.22599	2.10947	2.53114	2.64816	1.79003	-0.187434	0.373298
		135	0.124296	0.0449684	-0.27234	-0.193013	-0.0343588	-0.0506419	0.124296	-0.113686	0.0449684	-0.0506419	0.868718	-0.193013	0.18734	0.18734	0.345994	0.488365	-0.430995	0.108012	0.345994	-0.27234	-0.0343588	-0.113686	0.583975	-0.27234	0.488365	0.663303	0.726347	0.18734	-0.351668	0.124296	0.0449684	0.0449684	0.0449684	0.0449684	0.74263	0.821957	-0.193013	0.266667	1.18603	0.64702	0.821957	0.74263	1.64571	4.95742	1.86741	-0.430995	-0.351668
		136	0.149335	-0.388781	-0.388781	0.149335	-0.388781	-0.0877558	0.149335	0.687451	-0.388781	-0.0877558	0.514295	0.149335	-0.0877558	-0.0877558	-0.0877558	0.21327	-0.388781	-0.0877558	-0.0877558	0.149335	0.149335	0.687451	-0.0877558	0.687451	1.2895	0.988477	1.2895	-0.0877558	-0.388781	-0.388781	0.149335	-0.388781	-0.388781	-0.388781	-0.0877558	0.45036	-0.388781	-0.0877558	0.514295	0.21327	-0.0877558	0.45036	0.815321	3.80972	2.7307	-0.388781	-0.388781
		137	0.0857927	-0.597377	-0.452324	0.0132662	-0.452324	-0.30727	0.303372	0.696436	-0.52485	-0.452324	-0.597377	0.0132662	-0.234744	-0.0171641	-0.234744	-0.379797	-0.0896907	0.127889	0.345469	0.593479	0.158319	1.20412	0.200416	0.914015	0.768962	1.13159	0.768962	-0.379797	-0.234744	0.127889	0.666005	-0.30727	0.0553624	-0.30727	0.272942	0.883585	0.0553624	-0.0896907	0.563048	0.200416	0.0553624	0.520952	0.272942	2.9554	2.54003	-0.234744	0.127889
		138	-0.0879727	-0.771142	-0.407557	0.0580325	-0.626089	-0.481036	0.348139	0.741202	-0.480084	0.0295063	-0.55261	-0.160499	-0.408509	-0.19093	-0.189977	-0.553562	0.392139	0.391187	0.827299	0.856777	-0.0154461	1.03036	0.463714	0.74025	0.595197	0.95783	0.595197	-0.335031	0.0285543	0.391187	1.36637	0.174559	0.755724	0.174559	0.973304	1.14688	0.974256	-0.263456	1.48194	0.900777	0.537192	1.22131	0.53624	1.04488	3.89599	0.0285543	0.391187
		139	-0.236786	-0.530626	0.0809377	-0.189972	-0.484765	-0.24052	0.000942548	-0.441685	-0.0411847	0.0220431	-0.113711	-0.160525	-0.366377	0.0991821	0.0505384	-0.213855	0.533463	0.532511	1.06781	0.75756	-0.263451	0.244235	0.45625	-0.194658	-0.538095	0.171709	-0.190924	-0.243302	0.318666	0.78049	1.11836	0.514267	0.99624	0.514267	0.866649	1.14686	1.31396	0.175443	2.11922	1.0917	1.07528	0.923713	0.677564	1.38459	2.77013	1.50897	1.32604
		140	0.503602	0.210963	1.25288	0.622942	0.687177	0.210963	-0.0516554	-0.0615274	0.196324	0.474728	0.0524723	0.220835	-0.131272	-0.170995	-0.00205954	0.0224517	0.479664	0.117281	0.722707	0.702558	-0.314847	0.260559	-0.0315068	-0.463634	-0.374315	-0.0271441	-0.170995	-0.294698	0.266068	0.36526	0.703132	0.390344	0.653536	0.678047	0.306365	1.08945	1.25896	0.553198	1.98809	1.17935	1.16413	1.51664	0.548835	0.821898	1.84481	2.60718	1.91777
		141	0.691187	0.229797	1.13756	0.676372	0.790387	0.5673	-0.166977	-0.00809765	-0.00337408	0.00671813	-0.147225	0.408421	0.14069	0.0165902	-0.201757	0.125662	0.09603	-0.0478214	0.170321	0.621832	-0.211637	0.448144	-0.365361	-0.191673	-0.186729	0.0760657	0.0165902	0.0962347	0.438469	0.284533	0.522845	0.00671041	0.220122	0.547541	0.0417029	1.0931	0.691392	0.825159	0.998642	0.408428	0.611748	0.745727	0.299357	0.185137	0.4183	4.21397	2.68081
		142	0.643884	0.152223	0.87169	0.72826	1.17012	0.489726	-0.254642	0.321185	-0.219646	0.0577508	-0.303811	-0.145787	0.201813	-0.050894	-0.0405876	-0.11079	0.117647	0.0931679	0.092747	0.0474444	-0.398493	0.320974	-0.254642	-0.289428	0.0332714	0.00858161	0.0684781	0.644936	0.609729	-0.00151434	0.873163	0.307433	0.26192	0.490147	0.490357	0.777639	0.992114	0.668574	0.822731	0.619194	0.535029	0.966583	0.320974	0.306801	0.331491	3.7321	2.14763
		143	0.0982986	-0.29337	-0.0615904	0.182674	0.456134	0.307287	-0.0493857	-0.0682743	-0.0143895	0.106881	-0.0862802	0.310348	0.33866	0.110503	-0.142344	-0.400257	-0.0841014	-0.184024	-0.340571	-0.298156	-0.400257	-0.124618	-0.26868	-0.115756	-0.212336	-0.193167	0.405311	0.950185	0.771127	0.203742	0.859125	0.481105	0.511035	0.463834	1.17806	0.539066	1.56755	0.517719	0.440307	0.42448	0.177154	0.177154	-0.124618	-0.0387988	-0.0579679	3.83916	2.26697
		144	-0.089277	0.0758707	0.223275	0.686852	0.935031	0.339024	0.235479	-0.146193	0.354851	0.113337	-0.105104	0.704869	0.0667089	0.11696	0.420929	0.0786403	0.0320118	0.320154	-0.055706	-0.460451	0.466705	0.269903	-0.177848	-0.193675	-0.0118471	-0.296367	0.6058	0.34073	0.743769	0.623544	0.359327	1.17931	1.04049	0.132787	2.12087	0.68046	1.43054	1.0219	0.919204	0.32128	0.462019	0.0739539	-0.312194	0.13641	0.0328647	3.54161	1.26091
		145	-0.309708	-0.244227	-0.156509	0.884509	0.535543	0.437014	0.253793	-0.386614	0.67188	-0.0873878	-0.126486	0.842555	0.0850224	0.0159014	0.419537	0.375679	-0.00936072	-0.119315	-0.236441	-0.482118	0.206294	-0.0501942	-0.0201718	0.163049	-0.331944	-0.536788	0.385369	-0.178131	0.125241	0.641857	-0.159534	0.799817	1.15847	-0.0279575	2.17916	0.579402	1.60849	1.13988	0.858126	0.180526	-0.0171464	0.152238	-0.353567	-0.203393	-0.386614	3.91889	1.12016
		146	-0.366758	-0.257418	-0.257418	0.827459	0.215339	0.160669	0.0213068	-0.312088	0.439394	0.383994	-0.227396	0.215339	-0.366758	0.662719	0.494064	0.494064	0.856751	0.130647	0.717389	-0.45145	0.324679	-0.0633856	-0.0333632	0.105999	-0.257418	0.329324	0.0213068	-0.366758	-0.0633856	1.24482	0.662719	0.742766	0.882129	-0.172726	1.46423	0.215339	0.718119	0.688096	0.494064	-0.227396	-0.118056	0.886774	-0.366758	-0.172726	0.523357	4.30468	-0.0333632
		147	-0.43297	-0.503675	-0.364996	0.123797	-0.36363	0.26111	0.468446	0.537103	0.678514	0.678467	0.0530911	-0.0169316	0.0524081	0.749173	0.331133	0.608491	0.818513	-0.642355	0.679151	-0.573015	-0.503675	-0.503675	-0.154928	0.261793	-0.364996	0.609811	-0.155611	-0.224951	-0.364996	0.749173	1.23455	0.26111	0.608491	0.0524081	0.331133	0.121748	0.541201	0.192453	0.677831	0.19177	-0.364313	1.51396	0.260427	0.399106	0.88717	3.11624	1.16253
		148	-0.682521	-0.327152	-0.0411226	-0.175466	-0.318481	0.387922	0.73462	1.01631	0.0845504	0.781316	-0.188473	-0.192808	0.0238816	0.941672	0.539607	0.743291	1.52674	-0.171131	0.789986	-0.470167	-0.327152	-0.400827	-0.322817	-0.266483	-0.188473	0.646972	-0.184137	-0.106127	0.0325525	0.720647	1.50072	0.461597	0.44859	0.0238816	0.244907	0.387922	0.110563	0.0325525	0.591605	-0.0497935	-0.179802	1.14102	0.305576	0.149555	1.07168	2.79123	2.32079
		149	-0.823984	-0.468615	-0.182586	0.244908	-0.179025	0.246459	1.43591	1.15577	0.224006	-0.195592	-0.329936	-0.334271	-0.117581	0.245683	0.398144	0.882747	0.830749	0.530162	-0.186921	-0.330711	-0.187696	-0.54229	-0.183361	-0.407946	-0.329936	-0.329936	-0.3256	0.033329	-0.10891	-0.256261	0.523817	0.601053	0.588046	0.163337	0.9462	0.527378	1.09277	0.172008	0.731061	0.932418	-0.0403461	0.445031	0.445031	0.28901	0.375692	2.10255	3.86484
		150	-0.237921	-0.560065	-0.569213	0.222798	0.494196	0.121307	0.651067	0.319403	-0.196323	-0.63374	-0.716563	-0.477242	-0.642888	0.172052	0.0293359	0.23658	0.53128	0.577392	-0.48639	-0.196323	-0.122648	-0.164246	-0.048973	-0.707415	-0.403567	-0.560065	-0.173394	0.411373	0.756447	0.139603	0.277805	0.788897	0.567872	0.890016	0.890388	0.245727	1.24498	-0.214619	0.32855	1.3461	0.337698	0.1812	0.0247021	-0.426496	0.0247021	2.53405	3.77726
		151	-0.104967	-0.649577	-0.881191	-0.0877394	0.482682	-0.111233	0.193179	-0.137044	-0.287276	-0.574461	-0.580727	-0.342847	-0.580727	-0.21216	-0.799809	-0.218426	-0.0681947	0.418527	-0.574461	0.0883034	0.163419	0.195497	-0.137044	-0.724693	0.0327323	0.101582	0.18923	0.4013	0.671258	0.351995	-0.255198	0.482682	0.482682	1.17752	0.506175	0.163419	1.16267	0.301118	0.845728	1.85752	0.476416	0.244802	0.0883034	0.157153	0.614114	2.01401	3.41466
		152	-0.167488	-0.194541	-0.633178	-0.608587	0.346265	0.0332686	-0.712098	-0.273461	-0.320181	-0.429959	-0.332714	-0.0948338	-0.0221795	-0.5556	-0.655307	-0.14782	0.00241139	-0.279728	-0.326448	-0.0481136	0.234025	0.44351	-0.273461	-0.476679	0.280746	0.246083	0.333732	0.471906	0.712248	0.600008	0.30335	0.6568	0.449776	1.45515	-0.192079	0.234025	0.494035	0.475236	0.502288	0.981854	0.650533	0.211896	0.365933	0.331271	0.477697	2.27698	2.28769
		153	-0.54544	-0.102998	-0.385137	-0.517044	-0.188185	-0.188185	-0.620555	-0.338417	-0.385137	-0.338417	-0.0846732	-0.159789	0.225861	-0.620555	-0.563764	-0.0562775	0.0939542	-0.188185	-0.234905	-0.113069	0.16907	0.0655585	-0.338417	-0.385137	0.21579	0.337626	0.112279	0.0939542	-0.291696	0.0655585	-0.074602	1.27005	1.06303	0.451209	-0.413532	0.16907	0.272582	0.723277	1.42854	0.290906	0.272582	-0.00955735	0.300977	0.422813	0.412742	1.42953	1.12725
		154	-0.446818	0.07074	-0.136283	0.752098	-0.458876	-0.0207138	-0.227737	-0.239795	0.520959	0.417448	0.520959	-0.136283	0.174252	-0.00865605	-0.239795	0.40539	-0.0327715	-0.0207138	0.0827978	-0.239795	-0.251852	-0.136283	-0.0207138	0.301879	-0.136283	0.198367	-0.239795	-0.251852	-0.562387	0.0827978	0.174252	0.999362	1.01142	-0.0448293	-0.239795	0.186309	0.508902	0.07074	1.13905	0.0827978	0.508902	-0.136283	-0.0448293	0.07074	0.417448	1.22142	1.26966
		155	0.224236	-0.312254	-0.312254	0.78315	0.00515497	0.443317	0.443317	0.224236	0.344988	0.344988	0.344988	-0.312254	-0.312254	0.125907	-0.312254	0.125907	-0.312254	0.443317	0.443317	0.224236	-0.531335	-0.312254	-0.0931734	0.125907	-0.312254	0.125907	0.224236	-0.531335	-0.531335	-0.0931734	-0.312254	1.15286	0.835449	-0.531335	-0.312254	0.443317	0.125907	-0.312254	1.8101	0.443317	0.125907	-0.312254	0.00515497	-0.312254	0.344988	0.443317	0.78315
		156	0.324718	-0.547418	-0.278901	1.01789	0.172766	0.543799	0.879445	0.458976	0.378341	0.311212	0.244083	-0.34603	-0.211772	0.15926	-0.0103844	0.15926	-0.278901	0.543799	0.342411	0.19046	-0.632241	-0.34603	-0.12695	0.22639	-0.34603	0.0921312	0.458976	-0.565111	-0.632241	-0.0598204	-0.211772	0.172766	-0.144643	-0.565111	-0.0775136	0.47667	0.0921312	-0.480289	0.561492	0.543799	0.15926	-0.211772	0.172766	-0.211772	0.244083	1.28222	1.9577
		157	0.199873	-0.728154	-0.347856	-0.314139	0.322892	0.143983	0.423738	0.222351	-0.515527	-0.526766	-0.649785	-0.526766	-0.336617	-0.515527	-0.0793396	-0.291966	-0.403747	0.199873	0.0543753	0.00972408	-0.593895	-0.526766	-0.470876	-0.336617	-0.526766	-0.359095	0.334131	-0.359095	-0.649785	-0.459637	-0.336617	0.211112	-0.269488	-0.526766	-0.314139	0.132743	-0.582656	-0.716915	-0.113295	0.0880923	-0.515527	-0.448398	0.155222	-0.448398	-0.649785	1.83254	1.35224
		158	-0.275673	-0.667209	-0.286912	-0.253195	-0.152653	-0.331563	-0.0518069	1.14245	-0.454582	-0.465821	-0.588841	-0.465821	0.654755	-0.454582	-0.0183947	-0.231021	-0.342802	-0.275673	-0.42117	-0.465821	-0.53295	-0.465821	-0.409931	-0.275673	-0.465821	-0.298151	-0.141414	-0.298151	-0.588841	-0.398692	-0.275673	-0.264434	-0.208543	-0.465821	0.212019	-0.342802	-0.0564974	-0.65597	-0.588841	-0.387453	0.0106318	0.542975	-0.320324	-0.387453	-0.123627	1.35699	2.80883
		159	-0.261501	-0.622453	-0.205611	-0.678343	-0.205611	-0.622453	-0.678343	0.717299	-0.373282	-0.622453	-0.373282	-0.622453	0.363865	-0.678343	-0.510672	-0.454782	-0.566562	-0.566562	-0.510672	-0.622453	-0.622453	-0.317391	-0.566562	-0.566562	-0.317391	0.15534	-0.261501	-0.149721	-0.678343	0.292731	0.348621	-0.622453	0.0435599	-0.622453	-0.213129	-0.566562	0.0919323	-0.678343	-0.678343	-0.678343	0.0919323	0.557146	-0.678343	-0.678343	0.396993	1.24286	2.35906
		160	-0.267818	-0.528177	0.0450992	-0.483475	-0.312521	-0.57288	-0.483475	0.733357	-0.312521	-0.617582	-0.357223	-0.617582	0.491656	-0.483475	-0.528177	-0.662285	-0.349367	-0.39407	-0.483475	-0.483475	-0.528177	-0.312521	-0.528177	-0.662285	-0.223116	-0.00745974	-0.0890084	-0.133711	-0.39407	0.655222	0.655222	-0.528177	0.260755	-0.259962	0.115847	-0.304665	0.376206	-0.57288	-0.304665	-0.528177	0.107991	0.84142	-0.483475	-0.617582	0.547159	1.10225	2.49789
		161	0.40868	-0.369496	0.0311748	-0.670005	-0.15384	-0.414198	-0.670005	-0.676209	-0.499051	-0.804112	-0.371148	-0.804112	-0.452696	-0.670005	-0.542101	-0.676209	-0.535897	-0.235388	0.0204182	-0.497399	-0.714707	-0.326445	-0.542101	-0.848815	0.108171	-0.19399	-0.275538	-0.147635	0.455035	0.813903	0.986509	-0.369496	0.764648	0.0713251	-0.01808	-0.145983	0.242279	-0.414198	-0.318589	-0.542101	-0.198542	-0.102933	-0.152188	-0.804112	-0.104585	1.60614	1.60614
		162	0.191543	-0.281571	-0.185962	-0.413247	-0.28656	-0.326274	-0.497664	-0.503868	-0.716188	-0.631771	-0.588285	-0.631771	-0.195939	-0.413247	-0.285344	-0.503868	-0.110307	0.190202	0.446009	0.265858	-0.45795	-0.459166	-0.369761	-0.592057	-0.108966	-0.716188	0.0982405	-0.195939	0.542959	0.32431	0.243666	-0.281571	0.326867	0.412499	0.154261	0.110774	0.278391	-0.157441	-0.0618315	0.0523221	-0.162429	-0.151236	0.442236	-0.294105	-0.45795	1.62305	1.70746
		163	0.379092	-0.138725	-0.548855	-0.0775782	-0.0543082	1.0489	-0.637045	-0.226914	-0.483936	-0.39952	-0.0738056	-0.39952	0.332552	0.159947	-0.380022	0.010611	-0.14627	-0.0385835	0.306628	0.601527	-0.315103	-0.226914	0.248136	-0.315103	0.983981	-0.00888636	0.10698	0.0950275	1.5018	0.198941	1.30592	0.0988002	0.290903	0.524655	-0.119227	0.267633	0.287131	0.0301083	0.332552	0.195169	0.35205	0.0950275	0.54038	0.175671	-0.552628	1.05065	0.897544
		164	-0.258099	-0.258099	-0.495624	0.148259	-0.173682	0.929526	-0.411207	-0.173682	-0.258099	-0.173682	-0.0205741	-0.173682	0.385784	0.385784	-0.326791	0.0638425	0.0795671	-0.157958	-0.157958	0.654758	-0.0892659	-0.173682	0.301367	-0.0892659	0.692001	0.216951	0.332817	0.148259	0.692001	0.0795671	1.01394	-0.0205741	-0.173682	0.232676	-0.411207	0.148259	-0.0048494	-0.0892659	0.385784	0.2484	0.232676	0.148259	0.2484	0.401509	-0.326791	1.8077	1.65459
		165	-0.36684	-0.0872672	-0.604365	0.150258	-0.143182	1.15627	-0.157048	0.0804765	-0.0872672	-0.143182	0.0384286	0.0804765	0.443697	0.275954	-0.492536	0.0943432	-0.143182	-0.212963	0.0106952	0.318001	-0.0872672	-0.143182	0.275954	-0.0313526	0.806918	0.443697	-0.143182	0.0943432	1.03058	-0.0872672	1.04444	0.0943432	0.192306	0.206172	-0.492536	0.318001	0.0245619	-0.0313526	0.443697	-0.0872672	0.150258	0.150258	0.0245619	-0.0174859	-0.157048	2.19675	1.56782
		166	-0.521405	-0.202529	-0.442799	-0.241832	-0.219141	-0.107312	0.161729	0.122426	-0.202529	-0.297747	-0.353661	0.00451756	-0.107312	-0.275055	-0.409576	-0.258444	-0.297747	-0.130003	0.132958	0.00451756	-0.241832	-0.297747	-0.353661	-0.146615	-0.179838	-0.146615	-0.219141	-0.179838	0.00451756	-0.202529	-0.219141	-0.219141	0.15565	-0.146615	-0.291667	0.0438205	0.027209	-0.0287056	-0.0287056	-0.202529	-0.0453172	-0.00601419	0.027209	-0.291667	0.122426	3.29988	2.67266
		167	-0.278215	-0.0122834	-0.384914	-0.157475	-0.161256	-0.0494269	0.246086	0.259728	-0.277005	-0.398695	-0.269304	0.194763	-0.128844	-0.164226	-0.272274	-0.306448	-0.160445	-0.0985905	0.190843	0.0888744	-0.21042	-0.133973	-0.348721	0.0436311	-0.0160642	-0.274035	-0.161256	0.0368802	0.0888744	0.14655	-0.028895	-0.028895	0.39884	-0.0357855	-0.127893	0.101705	0.217455	0.16154	0.00270684	-0.0917	-0.0139047	0.131287	0.296871	-0.127893	0.206783	2.90382	2.09129
		168	0.0577217	-0.136178	-0.229236	-0.28137	-0.229236	-0.229236	-0.0455521	0.148348	-0.220642	-0.286417	0.259405	-0.0968752	-0.128394	-0.176292	-0.0481671	-0.374428	-0.228426	-0.334314	-0.268539	-0.202764	-0.334314	-0.201953	-0.360787	-0.136178	-0.0840444	-0.453845	-0.229236	-0.0311	-0.202764	0.022655	-0.0968752	-0.0968752	-0.00462781	-0.215595	-0.0840444	-0.189933	-0.0182692	-0.0182692	-0.177102	-0.215595	-0.137799	0.00739231	0.421664	0.096214	0.0954033	1.89781	1.65694
		169	0.305984	0.739647	0.473913	0.233639	-0.192953	0.473913	-0.0331074	0.200095	-0.145055	0.228592	0.507668	0.0727814	0.174635	0.260111	0.866961	0.101278	0.419957	0.580814	-0.192953	-0.433227	0.180695	0.0463092	-0.245897	-0.193965	-0.220437	-0.378258	0.207167	-0.300866	0.233639	-0.0351318	-0.327338	-0.327338	0.125726	-0.273382	-0.220437	-0.326326	-0.327338	-0.0605918	0.0473214	-0.00663522	-0.352798	-0.380283	0.512715	0.0931944	0.0137778	1.42187	1.68356
		170	-0.0113074	0.399962	0.291702	-0.012714	-0.400277	0.316814	-0.229235	-0.0364202	-0.194906	0.205214	0.248758	-0.241791	-0.00349786	-0.012714	0.517439	-0.000157593	0.158328	0.374849	-0.350052	-0.604242	0.11285	-0.116228	-0.387721	-0.420643	-0.39553	-0.375165	0.125406	-0.604242	0.0249551	-0.4332	-0.667024	-0.641911	-0.241791	-0.483425	-0.345305	-0.470869	-0.629355	-0.312383	-0.158644	-0.241791	-0.420643	-0.67958	0.181507	-0.0316734	-0.0442297	1.12489	1.55934
		171	-0.165396	0.426132	0.317872	0.0134561	-0.374107	0.342984	-0.203065	-0.190509	-0.348994	0.0511252	-0.265847	-0.215621	-0.157586	0.801334	0.36335	0.813891	0.972377	1.1889	-0.323882	-0.578072	0.13902	-0.0900576	-0.361551	-0.394473	-0.36936	-0.348994	0.151576	-0.578072	0.839003	-0.407029	-0.640854	-0.615741	-0.215621	0.330623	-0.319135	-0.444699	-0.603185	-0.286213	-0.132473	-0.215621	-0.394473	-0.65341	-0.152839	-0.185762	-0.198318	1.75868	2.01287
		172	-0.391691	-0.371415	-0.378173	-0.479586	-0.435158	-0.225574	-0.142516	-0.448676	-0.441917	-0.473788	-0.555885	-0.473788	-0.580998	0.244549	-0.561683	0.288977	0.377833	0.327608	-0.448676	-0.404248	-0.385894	-0.284481	-0.518216	-0.385894	-0.392653	-0.410045	-0.341466	-0.436119	0.409705	-0.430322	-0.530773	-0.50566	-0.50566	0.339202	-0.342427	-0.467991	-0.493104	-0.442878	-0.587757	-0.50566	-0.417765	-0.479586	-0.347263	-0.374299	-0.354984	1.38135	2.00623
		173	-0.405433	0.215526	-0.34169	-0.317876	-0.0233321	0.136026	-0.0310307	-0.174633	0.0323535	-0.524862	-0.469176	-0.524862	-0.118947	0.318702	-0.437304	0.700803	0.414317	0.501874	0.175596	-0.317876	-0.524862	-0.198447	-0.206504	-0.437304	-0.294062	0.151782	-0.142761	-0.437304	0.621303	-0.206504	-0.294062	-0.294062	0.0561674	0.613245	-0.0313898	-0.0313898	0.0561674	-0.0313898	-0.150819	0.406396	-0.0313898	-0.317876	0.0642251	-0.150819	0.0561674	1.11513	2.19035
		174	-0.495224	0.228217	-0.328998	-0.305184	0.194323	-0.0562471	-0.120822	-0.161942	-0.0574376	-0.204724	-0.354003	-0.717135	-0.208738	-0.354003	-0.424613	-0.279349	-0.463352	-0.478277	0.0858053	-0.510149	-0.409689	-0.0832734	-0.193813	-0.629578	-0.0764062	0.164473	-0.232552	-0.527096	-0.358848	-0.0913311	-0.281371	-0.281371	0.171341	-0.264424	-0.223663	-0.0186987	0.273823	-0.0186987	0.0668366	0.624052	-0.121181	-0.305184	0.28188	-0.24061	-0.0336236	0.852358	1.92758
		175	-0.402617	0.225209	-0.300135	-0.212578	0.255058	-0.15487	-0.31506	-0.0374631	0.0351693	-0.0802457	-0.197653	-0.592656	-0.052388	-0.197653	-0.300135	-0.15487	-0.402617	-0.417542	0.210284	-0.417542	-0.28521	-0.0225382	-0.0374631	-0.505099	0.0799439	0.225209	-0.139945	-0.402617	-0.329985	0.065019	-0.12502	-0.12502	0.327691	-0.139945	-0.0673129	0.137651	0.430173	0.137651	0.255058	0.780402	0.0351693	-0.212578	0.342616	-0.052388	0.122727	0.562505	1.00029
		176	-0.328138	-0.225656	-0.225656	-0.225656	0.880638	-0.430621	-0.328138	-0.225656	-0.328138	0.0817902	-0.123174	-0.430621	-0.328138	-0.123174	-0.225656	-0.430621	-0.328138	-0.430621	-0.328138	-0.430621	-0.123174	-0.123174	0.675674	-0.430621	-0.020692	-0.225656	-0.328138	-0.328138	-0.430621	-0.123174	-0.225656	-0.225656	-0.123174	-0.328138	-0.430621	-0.225656	-0.020692	-0.225656	-0.020692	-0.020692	-0.328138	-0.225656	-0.020692	-0.328138	-0.328138	0.286754	0.286754
		177	-0.139813	-0.0418349	-0.139813	0.0561431	0.66354	0.0561431	-0.0418349	0.154121	-0.0418349	-0.237791	-0.0418349	-0.237791	-0.139813	-0.0418349	-0.139813	-0.0418349	-0.237791	0.0561431	-0.237791	0.0561431	-0.139813	-0.139813	0.565562	0.154121	-0.139813	0.154121	-0.0418349	0.154121	0.154121	0.448055	0.350077	0.154121	-0.139813	-0.433747	-0.139813	0.252099	-0.335769	0.154121	-0.237791	-0.0418349	-0.0418349	-0.237791	-0.139813	-0.237791	-0.335769	0.448055	0.448055
		178	-0.353914	-0.255936	-0.353914	0.181501	0.958627	0.0117714	-0.00134193	0.279479	-0.171071	-0.282163	0.0835228	-0.282163	-0.269049	-0.171071	-0.184185	0.168387	-0.451892	0.0117714	0.0572961	0.0966361	-0.269049	-0.438779	0.35146	0.194614	-0.438779	0.279479	-0.0862066	0.279479	0.958396	0.912871	0.730029	0.279479	0.155274	0.200799	-0.438779	0.462321	0.213912	0.703802	0.396755	-0.00134193	-0.0862066	-0.536757	0.0704095	-0.367027	-0.210411	0.318819	0.743142
		179	-0.329646	-0.138677	-0.329646	0.252264	0.174555	-0.103448	0.0694216	0.303747	-0.193299	-0.0719119	0.154286	-0.350886	-0.15179	0.0391794	-0.206413	0.0531681	-0.567111	0.0825349	0.0350682	0.120904	-0.291277	-0.507502	-0.618594	0.218882	-0.553998	0.257251	-0.201426	0.210755	0.982664	0.890644	0.94028	0.489729	0.412021	0.318058	-0.182032	0.440094	0.191684	0.72807	0.281536	0.0694216	-0.0154431	-0.558985	0.187669	-0.342759	0.185822	0.947531	1.23237
		180	-0.370491	-0.116689	-0.20968	0.176274	0.231689	-0.501059	0.25222	-0.191842	-0.332122	-0.0147785	0.0154637	-0.132942	-0.353445	-0.260454	-0.408068	-0.246465	-0.509978	-0.315076	-0.0686088	0.205724	-0.492932	-0.709157	-0.302672	0.0449137	-0.755653	0.0832826	-0.340249	0.0367869	0.647885	0.422741	0.891976	0.476572	0.210366	0.410337	-0.222877	-0.153474	0.346796	0.232481	0.66029	-0.069401	0.00654472	-0.18023	0.146824	-0.285626	0.501744	0.479629	0.603655
		181	-0.38982	0.0567223	-0.0362692	-0.182514	0.281392	-0.690118	-0.0217034	-0.35789	-0.0508351	-0.396577	0.234897	-0.322001	-0.457639	-0.171907	-0.597126	-0.497377	-0.143827	-0.504135	-0.597126	-0.0681991	-0.597126	-0.643622	-0.129261	0.156471	-0.882858	-0.275505	-0.336567	-0.514741	-0.58256	0.302716	0.664075	0.310524	-0.125411	-0.0721583	0.228139	-0.404386	-0.243575	-0.55063	-0.014946	0.0421564	0.0102265	-0.114695	-0.296828	-0.38982	0.335697	0.568175	0.653358
		182	-0.576553	-0.132606	-0.132606	-0.415742	0.0920642	-0.737363	-0.164536	-0.363831	-0.191072	-0.769293	0.363253	-0.325346	-0.646967	-0.454227	-0.556571	-0.454227	-0.100676	-0.466175	-0.466175	-0.0741397	-0.737363	-0.646967	-0.0422098	0.150531	-0.839707	0.0362383	-0.293416	-0.518087	-0.769293	0.343271	0.291359	-0.0621917	-0.454227	-0.17109	-0.100676	-0.454227	-0.293416	-0.646967	0.118601	0.170512	0.138582	0.106653	-0.0341759	-0.305364	0.409771	0.0481864	0.815233
		183	-0.50603	-0.40355	-0.523987	-0.807124	-0.0782879	-0.746905	-0.475852	-0.192716	-0.180768	-0.939645	0.674651	-0.114539	-0.415633	-0.222893	0.156514	0.0179823	-0.0903716	-0.355279	-0.234841	-0.385456	-0.807124	-0.656509	-0.252935	-0.180632	-0.78903	-0.174487	-0.40355	-0.608374	-0.879426	0.373421	-0.000111213	-0.433727	-0.0422365	2.45087e-05	0.150504	-0.162674	-0.343331	-0.234977	-0.0120592	0.481911	0.530046	0.216868	0.457879	-0.234841	0.620578	-0.0421008	1.06641
		184	-0.489953	-0.580213	-0.700651	-0.791047	-0.533585	-0.410286	-0.139233	-0.262532	-0.336477	-0.517133	0.43305	-0.0984626	-0.399557	-0.399557	0.279438	-0.0518339	-0.246081	-0.232355	-0.111917	0.0580109	-0.470504	-0.533585	-0.215903	-0.550036	-0.580213	-0.0515624	-0.366518	-0.185862	-0.456914	-0.0818754	-0.369515	-0.289848	-0.2189	-0.36938	0.101643	-0.23249	-0.199452	-0.00520509	-0.188723	0.112507	0.353382	0.339792	0.580803	-0.111917	0.550762	0.315473	1.14535
		185	-0.186217	-0.562309	-0.487311	-0.878182	-0.320245	-0.106549	0.0741071	-0.139588	-0.228176	-0.408833	0.570637	0.114877	-0.381652	-0.577088	0.206946	0.161506	-0.423611	-0.590678	-0.0793693	-0.0144808	-0.362204	-0.320245	0.102476	-0.622528	-0.562309	-0.395242	-0.544049	0.0274783	-0.544049	1.01825	0.129656	-0.181547	0.189875	-0.637307	0.705853	0.567156	-0.376983	0.40357	-0.0657792	-0.140777	0.295534	0.0865084	0.537598	0.116066	-0.169146	0.543457	0.830961
		186	-0.293082	-0.580735	-0.385299	-0.77617	-0.278452	0.0274606	-0.0647563	-0.278452	-0.274822	-0.274822	0.130679	-0.293082	-0.580735	-0.77617	-0.473887	-0.278452	-0.562475	-0.669322	-0.278452	-0.153344	-0.260192	-0.278452	0.0238316	-0.580735	-0.580735	-0.473887	-0.562475	-0.079387	-0.562475	0.698726	-0.189864	-0.167975	-0.189864	-0.683953	0.326115	0.307855	-0.36341	0.0238316	-0.385299	-0.580735	-0.385299	-0.473887	-0.083016	0.00920086	-0.669322	0.621025	0.635656
		187	-0.23197	-0.0370448	-0.0828979	0.00880829	0.520324	0.00931903	-0.0828979	-0.0828979	0.296461	-0.427405	0.47447	0.371252	-0.0370448	0.250097	0.324888	0.640968	-0.111836	-0.353125	-0.324186	0.0835995	-0.398978	-0.203542	0.353826	-0.398978	-0.398978	-0.0370448	-0.473769	-0.352614	-0.594413	0.894279	0.112538	-0.0654722	0.233182	-0.62284	0.549262	0.382764	-0.0196191	0.233182	0.158391	-0.519622	-0.324186	-0.640266	-0.249395	0.0841102	-0.715057	0.268544	0.0556829
		188	-0.392243	-0.00188283	-0.243171	0.207966	0.32861	-0.182394	-0.258891	-0.274611	0.315903	-0.376523	0.118761	0.210978	-0.0490428	0.433534	0.37577	0.433534	0.165921	-0.0124871	-0.45302	0.118761	-0.332376	-0.363816	0.0452772	-0.379536	-0.332376	-0.0333228	-0.243171	-0.387127	-0.269496	-0.133131	-0.258891	0.0640098	-0.0439271	-0.219323	0.123877	-0.285216	0.305298	0.113273	0.171037	-0.32726	-0.39014	-0.542224	-0.495064	-0.208719	-0.39014	0.0543151	-0.142826
		189	-0.435927	0.04665	-0.219163	0.264673	0.360793	-0.226079	-0.210359	-0.226079	0.264044	-0.371158	0.183644	0.183644	-0.00868487	0.482067	0.424303	0.498417	0.206279	0.0196961	-0.396312	0.159119	-0.292018	-0.323458	0.09381	-0.322828	-0.251144	0.0724337	-0.194639	-0.398112	-0.163739	-0.0764238	-0.177659	0.0203257	0.037305	-0.189434	0.196934	-0.179459	0.310663	0.251729	0.227745	-0.270552	-0.325257	-0.469167	-0.389308	-0.260578	-0.349782	0.0387424	-0.188804
		190	-0.0111659	-0.0111659	0.139657	-0.209778	-0.0589555	0.132741	0.323809	-0.0426059	-0.210408	-0.472439	-0.520858	-0.345511	0.284194	-0.233673	0.179901	0.133371	0.203167	0.257872	-0.322245	-0.194688	0.0120993	-0.545382	0.0359941	0.331983	-0.473068	-0.336077	-0.36186	-0.0280538	0.140378	0.282396	-0.344881	0.433849	-0.0752138	-0.290714	0.66516	-0.401384	-0.218491	0.314557	0.520623	-0.0211382	-0.0758434	0.0762386	-0.0192493	-0.307155	0.425674	0.342859	-0.114737
		191	-0.171031	-0.171031	0.0437894	-0.274206	0.196608	0.0043157	0.243661	-0.107033	-0.162559	-0.584026	-0.360733	-0.569374	0.299484	-0.282381	0.0683138	0.21266	0.316132	0.17996	-0.321557	-0.290555	0.140784	-0.321259	0.0209629	0.507828	-0.600376	0.0474828	-0.201735	0.134307	0.398177	0.396479	-0.489027	0.243661	-0.313679	-0.559502	0.379535	-0.383857	-0.280683	0.110886	0.44383	-0.274206	-0.202033	0.173484	-0.0331625	-0.529901	0.171488	0.361504	-0.111812
		192	-0.0797412	-0.217569	0.0217766	-0.0532628	0.304248	-0.0422215	0.197124	-0.153571	-0.200922	-0.541785	-0.42362	-0.494434	0.398949	-0.19109	0.0217766	0.149773	0.415597	0.149773	-0.376269	-0.328918	0.102422	-0.359622	-0.0255743	0.453116	-0.541785	-0.0562781	-0.248272	0.192898	0.570071	0.341767	-0.292608	0.334951	-0.255088	-0.679612	0.4463	-0.211963	-0.238441	0.250081	0.389118	-0.19109	0.28639	0.240249	-0.136923	-0.568263	0.133126	0.378077	0.303037
		193	-0.614998	-0.676582	-0.688827	-0.260685	-0.154766	-0.600338	-0.53634	-0.383854	-0.560831	-0.474756	-0.127861	-0.450266	-0.410758	-0.0935392	-0.53634	-0.332101	-0.218764	-0.332101	-0.408344	-0.53634	-0.204104	-0.292593	-0.408344	-0.127861	-0.322269	-0.164597	-0.280348	0.29045	0.568519	-0.21635	-0.0959533	0.0589476	-0.157537	-0.231367	0.757384	0.6175	0.263187	-0.0564458	-0.344346	-0.169783	0.0789676	0.0862098	-0.0393723	-0.295365	-0.371608	0.529011	0.957153
		194	0.138657	-0.261686	-0.33793	-0.3163	-0.123859	-0.0499392	-0.524203	0.305803	-0.270178	-0.327115	-0.0329562	0.0286278	-0.191611	0.121854	-0.456451	-0.312455	-0.530371	-0.447959	-0.456451	-0.456451	0.0263042	-0.261686	-0.320947	-0.236212	0.164132	-0.73595	-0.185443	-0.0814017	0.335925	-0.456451	-0.0875696	0.0710851	0.0541022	-0.0159733	1.03678	0.776403	0.147329	-0.172304	-0.659707	-0.293149	0.230363	0.113363	-0.151477	-0.286981	-0.159969	1.03043	1.39082
		195	0.016152	-0.11118	0.0829464	-0.171078	0.0240051	-0.169802	-0.373696	0.321126	0.0155136	-0.314435	0.117551	-0.229062	-0.314116	0.269718	-0.305944	-0.297133	-0.788061	-0.297452	-0.0355746	-0.711498	0.447181	-0.246364	-0.0352554	-0.356075	0.0416264	-0.720628	-0.0349362	0.201647	0.0755923	0.0996101	-0.212718	0.489319	0.201966	0.134534	0.779085	0.786439	0.160008	-0.0270831	-0.23883	-0.145285	-0.17044	0.396412	0.269399	-0.0012895	-0.00946177	0.499725	1.1252
		196	0.061902	0.139926	0.269496	-0.137016	-0.00648831	0.14586	-0.480433	0.343501	0.0612636	-0.344929	-0.141673	-0.412042	-0.34461	-0.0011927	-0.271881	-0.339314	-0.677755	-0.480433	-0.142311	-0.818235	0.405	-0.276858	0.139607	-0.615298	-0.141354	-0.751121	-0.141673	-0.210063	-0.412362	-0.00712671	-0.548185	-0.0748787	-0.0689446	-0.136377	-0.547546	-0.00648831	-0.480433	-0.0692638	-0.345567	-0.480752	-0.277177	0.0609444	-0.0015119	0.00939853	-0.344929	-0.140715	0.61387
		197	-0.343818	0.0729658	0.127738	0.352132	-0.372641	-0.131402	-0.433028	-0.211815	0.0761479	-0.433028	-0.283431	-1.00259	-0.792607	-0.231842	-0.591421	-0.577009	-0.487799	-0.657422	-0.0878601	-0.988178	-0.246253	-0.643011	-0.16584	-0.17981	-0.568212	-0.493414	-0.433028	-0.237456	-0.717809	-0.102272	-0.133835	-0.0274736	-0.0822453	-0.21743	-0.553801	0.150946	0.46455	0.42693	0.211333	-0.0734485	0.0905595	0.510525	0.501728	0.199354	-0.208633	-0.314995	0.432545
		198	-0.191691	0.267281	-0.214375	-0.078667	-0.535226	0.0228806	-0.549114	-0.23706	-0.0864373	-0.460428	-0.310832	-0.582248	-0.729166	-0.350084	-0.530135	-0.380539	-0.156144	-0.50745	-0.474316	-0.610024	-0.322308	-0.44654	-0.239739	0.151845	-0.416085	-0.474316	-0.283056	-0.535226	-0.521338	-0.668256	-0.205579	-0.504771	-0.333517	-0.333517	-0.266489	0.0327039	0.658865	0.12916	0.00224885	-0.280377	0.107502	0.390128	0.203959	0.0811116	-0.191691	0.018816	0.402989
		199	-0.0557364	0.121636	-0.219221	-0.0835124	-0.399272	-0.263564	-0.41316	-0.382705	0.0495168	-0.30521	-0.174878	-0.446294	-0.554684	-0.335665	-0.534981	-0.366121	-0.16099	-0.371496	-0.338362	-0.454807	-0.307889	-0.291322	-0.385384	0.307063	-0.260867	-0.338362	0.469336	-0.0525262	-0.366121	-0.513038	-0.0503608	-0.368817	-0.338362	-0.338362	-0.130535	0.187922	0.794819	0.124315	0.138203	-0.0866316	0.26272	0.526082	0.218377	-0.166805	-0.0557364	0.193297	0.430717
		200	0.405072	1.22926	-0.330432	0.227699	0.360728	-0.374775	-0.374775	-0.419118	-0.286089	-0.266825	0.360728	-0.108716	-0.291904	-0.222482	-0.197402	0.468678	-0.197402	-0.108716	-0.374775	-0.266825	-0.0451096	-0.178139	-0.197402	-0.178139	-0.222482	-0.374775	0.507721	0.707474	-0.178139	-0.399854	-0.311168	-0.330432	-0.374775	-0.374775	-0.241746	-0.222482	-0.0643732	-0.286089	-0.197402	-0.272641	-0.222482	-0.108716	-0.266825	-0.203218	1.05189	-0.291904	0.0203136
		201	0.237632	0.895499	-0.353939	0.292878	0.259731	-0.298693	-0.398136	-0.387086	-0.364988	-0.301528	0.292878	-0.34289	-0.249117	-0.367823	-0.34289	0.267945	-0.34289	-0.34289	-0.398136	-0.389921	-0.367823	-0.312577	-0.265546	-0.323626	-0.356774	-0.320791	0.262498	0.628575	-0.312577	-0.323626	-0.290479	-0.364988	-0.364988	-0.387086	-0.364988	-0.246282	-0.298693	-0.320791	-0.353939	-0.263	-0.290479	-0.353939	-0.334675	-0.193871	0.906548	-0.171772	-0.0258775
		202	0.261887	1.01736	-0.232074	0.317133	0.186375	-0.372049	-0.373881	-0.362832	-0.291928	-0.345342	0.268328	-0.221025	-0.409805	-0.314027	-0.318635	0.224131	-0.17222	-0.26983	-0.276271	-0.433735	-0.362832	-0.307586	-0.290096	-0.221025	-0.302977	-0.101316	-0.183269	0.501304	-0.258781	-0.221025	-0.139072	-0.145513	-0.194318	-0.0700008	-0.194318	-0.290096	0.0671978	-0.101316	-0.280879	-0.00370575	-0.0414617	0.0119519	-0.134464	-0.256948	0.979608	-0.0884346	-0.174996
		203	-0.229898	-0.302566	0.0136213	-0.35598	0.238571	-0.398344	-0.0375222	-0.389127	-0.136897	-0.00898315	-0.404785	0.296661	-0.254773	0.203659	-0.34493	-0.267654	0.254803	0.247856	0.332079	-0.18804	-0.389127	-0.152554	-0.407055	0.115334	-0.238609	0.235043	-0.390891	0.0095189	-0.466403	-0.428647	-0.346694	0.190846	0.0513773	-0.00563265	-0.12995	-0.316391	0.131566	-0.127611	-0.307174	0.0606624	0.294897	0.166984	-0.0700954	-0.464571	-0.340322	0.791905	0.34269
		204	-0.154496	-0.32952	-0.0803564	-0.404304	0.269048	-0.524741	-0.0416497	-0.427131	-0.151345	-0.136108	-0.475936	0.305768	-0.346565	0.211309	-0.381477	-0.203302	0.26391	0.142829	0.396431	-0.226772	-0.381477	-0.177323	-0.452465	0.0559606	-0.287662	0.222051	-0.416389	-0.0734096	-0.536826	-0.533674	-0.484869	0.176398	-0.0087245	0.0248442	-0.144398	-0.475936	0.0736494	-0.186256	-0.332672	-0.0208093	0.179549	0.141486	-0.141246	-0.451822	-0.287018	0.96517	0.504905
		205	0.1945	0.244574	0.171029	-0.270446	0.285376	-0.0781344	0.737624	-0.293273	0.256416	-0.0610153	-0.293273	0.126876	-0.389001	0.188792	-0.570328	-0.235778	0.143782	0.44302	0.325109	-0.0441094	-0.24762	-0.0434659	-0.269803	-0.0153617	-0.310179	0.0531185	-0.644085	0.0803659	-0.666912	0.0404199	-0.282288	0.330173	0.193856	-0.134129	-0.264526	-0.508412	-0.349268	-0.0324809	-0.0324809	0.142925	0.392089	-0.281431	-0.310179	-0.269159	-0.309536	0.786278	0.423624
		206	-0.0325244	0.198877	-0.146658	-0.316143	-0.485629	-0.123831	0.490171	-0.33897	0.0293915	-0.469366	-0.178072	-0.462802	-0.616025	-0.400886	-0.455127	-0.462802	-0.355233	-0.146658	-0.355233	-0.361797	-0.293317	-0.27049	-0.224836	-0.423713	-0.44654	-0.355233	-0.347558	0.175137	-0.531282	0.17605	0.175137	0.243617	0.358862	0.0513055	-0.0790907	-0.393211	-0.324731	0.0827198	-0.0781779	0.00656475	-0.016262	-0.347558	-0.285642	-0.133529	-0.355233	0.316639	0.638434
		207	-0.0967715	0.172148	-0.110219	-0.338805	-0.580838	-0.164007	0.440615	-0.379146	-0.0160964	-0.486716	-0.204801	-0.567391	-0.661513	-0.446374	-0.514062	-0.527049	-0.379138	-0.123666	-0.41948	-0.325357	-0.338805	-0.271569	-0.285016	-0.392585	-0.392585	-0.406032	-0.352704	0.305707	-0.352236	0.427644	0.346049	0.399837	0.480052	0.104015	0.0905763	-0.23168	-0.298915	0.131362	0.0377003	0.0780338	0.0511395	-0.298915	-0.191346	-0.271569	-0.338797	0.130457	0.411911
		208	-0.408035	-0.264683	-0.0272019	0.156491	0.326737	-0.475271	-0.00521573	-0.376701	-0.336359	-0.179561	0.290494	-0.152666	-0.434929	0.156491	0.00823145	-0.309465	-0.170553	-0.434929	-0.309465	-0.520052	0.0579209	-0.0719832	0.21028	0.0131397	-0.28257	0.295402	-0.13512	0.191584	-0.233221	0.089383	0.429065	0.384284	0.168789	0.205031	0.00345119	0.183045	0.0172389	-0.377041	-0.0764229	-0.143659	0.125157	-0.179901	-0.278471	-0.0719832	-0.130212	0.939462	0.530926
		209	-0.57633	-0.432979	-0.0773532	0.342627	0.512873	-0.0528462	-0.0981208	-0.0724201	0.0860653	0.361008	0.906453	0.269758	-0.130649	0.224484	0.151614	0.11296	0.133727	-0.248793	0.11296	0.13866	0.716633	0.468585	0.632704	0.435564	0.0217101	0.835971	0.244551	0.0559249	0.189203	0.511807	0.293406	0.0123373	-0.245912	0.0693721	0.222224	0.680859	-0.0756662	-0.115514	-0.244718	0.0424777	0.193149	-0.154662	-0.371376	-0.122134	0.0559249	1.11548	0.0307176
		210	-0.56674	-0.3696	0.176675	0.379112	0.576252	0.254971	-0.0347423	0.235397	0.122549	0.668825	1.43181	0.319689	0.136827	0.491959	0.432537	0.122549	0.102976	0.0186829	0.122549	0.161697	0.753117	0.437833	0.615399	0.418259	0.235397	1.0631	0.240693	-0.0151684	0.0239795	0.550681	0.874945	-0.152886	-0.330452	0.215823	0.0435534	0.555977	0.0976789	0.0578307	-0.138609	0.215823	0.162398	-0.212308	-0.429022	0.309096	-0.0151684	1.18125	0.598809
		211	-0.663471	-0.663471	0.157895	-0.309039	-0.309039	0.15824	-0.427183	0.040096	-0.0727513	0.276384	0.743663	-0.0727513	0.040096	-0.196192	0.512326	-0.0727513	-0.190895	-0.0780479	-0.0727513	0.163537	0.163537	0.0453926	-0.0727513	-0.0727513	0.512326	0.748614	0.0453926	0.163191	0.399479	0.15824	0.383935	-0.545327	0.0450472	0.394182	0.989853	0.163537	0.276038	0.15824	-0.43248	-0.0780479	-0.427183	-0.309039	-0.427183	0.388886	-0.309039	0.394528	0.502078
		212	-0.42598	-0.470322	0.321584	-0.514663	-0.514663	-0.23933	-0.381638	-0.0619632	-0.42598	-0.283672	-0.0083392	-0.337296	-0.150647	-0.150647	0.277242	-0.470322	-0.42598	-0.283672	-0.514663	-0.514663	-0.514663	-0.470322	-0.470322	-0.42598	0.188558	0.2329	-0.381638	0.0462505	0.134934	-0.194989	0.355677	-0.42598	0.0462505	0.2329	0.518481	-0.470322	0.321584	-0.194989	-0.283672	-0.23933	-0.470322	-0.42598	-0.470322	0.508233	-0.42598	0.159746	0.400019
		213	-0.537903	-0.0405709	-0.0213304	-0.626586	-0.626586	-0.311408	-0.493561	-0.404877	-0.267066	-0.0849127	0.501103	-0.178382	-0.493561	-0.493561	0.476001	-0.311408	0.274608	0.185924	0.185924	-0.626586	-0.355749	-0.311408	-0.582244	-0.537903	0.116481	-0.110014	-0.222724	0.205165	0.293848	-0.267066	-0.449219	-0.537903	-0.0656723	0.160823	0.406558	-0.311408	0.249506	0.00377096	-0.355749	0.230266	0.501103	0.274608	-0.582244	0.205165	-0.267066	-0.183168	-0.404877
		214	-0.552808	-0.113259	-0.508466	-0.641491	-0.525924	-0.268529	-0.508466	-0.477566	-0.224187	-0.157601	0.428414	-0.251071	-0.566249	-0.566249	-0.0111341	-0.384096	0.259703	0.171019	0.171019	-0.699275	-0.370655	-0.384096	-0.597149	-0.495024	-0.428438	-0.539366	-0.295413	-0.224187	-0.135504	-0.339754	-0.290774	-0.495024	-0.495024	-0.384096	-0.610591	-0.384096	-0.237629	0.0466494	-0.428438	0.215361	0.486198	0.201919	-0.654933	-0.339754	-0.339754	0.0330609	-0.246432
		215	-0.583436	-0.00116664	-0.288298	-0.681815	-0.664628	-0.353195	-0.583436	-0.739599	-0.451575	-0.197925	0.343748	-0.567142	-0.739599	-0.837978	-0.238521	-0.468762	0.0323155	0.130695	0.229074	-0.837978	-0.410979	-0.468762	-0.583436	-0.722411	-0.370383	-0.624032	-0.468762	-0.353195	-0.353195	-0.567142	-0.410086	-0.525653	-0.722411	-0.468762	-0.837978	-0.468762	-0.21422	0.016021	-0.272003	0.130695	0.499911	-0.025468	-0.837978	-0.567142	-0.567142	-0.450681	-0.410086
		216	-0.4519	-0.428199	-0.156762	-0.533385	-0.516198	-0.458707	-0.4519	-0.608063	-0.590876	-0.574274	-0.624958	-0.689548	-0.591169	-0.672654	-0.631765	-0.591169	-0.597976	-0.533385	-0.435006	-0.672654	-0.55028	-0.55738	-0.384323	-0.557087	-0.509684	-0.509391	-0.624958	-0.492496	-0.475602	-0.723337	-0.27855	-0.394117	-0.573981	-0.608063	-0.672654	-0.624958	-0.336627	-0.394117	-0.411304	-0.499597	-0.4519	-0.706443	-0.723337	-0.672654	-0.706443	-0.251568	-0.27855
		217	-0.266568	-0.251748	-0.149202	-0.45916	-0.535318	-0.597816	-0.488783	-0.609383	-0.685541	-0.531152	-0.559613	-0.646425	-0.414718	-0.629531	-0.646425	-0.548046	-0.50153	-0.348053	-0.427445	-0.473981	-0.542719	-0.469814	-0.443426	-0.651752	-0.488783	-0.626278	-0.537392	-0.476055	-0.503603	-0.546886	-0.266568	-0.44434	-0.313104	-0.276062	-0.45176	-0.315178	-0.306845	-0.222126	-0.212632	-0.380929	-0.377675	-0.418884	-0.591329	-0.540645	-0.596656	-0.519584	-0.44434
		218	-0.278997	-0.362556	-0.456769	-0.37321	0.0674678	-0.511866	-0.082755	-0.523433	-0.501211	-0.445201	-0.473663	-0.462096	-0.328767	-0.0267449	-0.462096	-0.462096	-0.3172	0.156353	-0.439874	-0.289651	-0.0383122	-0.383864	-0.455855	-0.0489663	-0.501211	-0.540327	-0.451442	0.446808	-0.417653	0.0559004	-0.278997	-0.456769	-0.128775	-0.190112	-0.26743	-0.229228	-0.417653	0.183902	-0.32344	-0.294979	0.028352	0.602358	-0.406999	-0.356316	0.00613057	-0.433634	-0.456769
		219	-0.235376	-0.213775	-0.236617	-0.12582	0.0500619	-0.369635	-0.30393	-0.259149	-0.45759	-0.302971	-0.589678	-0.700165	-0.610969	0.0713528	-0.347104	-0.523634	-0.544925	0.492009	-0.545545	-0.323952	-0.127089	-0.435059	-0.479812	0.313927	-0.501723	-0.347414	-0.302661	0.711093	-0.346794	-0.015982	-0.367774	-0.677943	-0.410976	-0.146491	-0.30173	-0.256977	-0.346794	0.712982	-0.147421	-0.302041	0.380902	0.645979	-0.302351	-0.0375549	0.18215	-0.45759	-0.28075
		220	-0.413971	-0.36005	-0.271785	-0.227653	-0.0739918	-0.247229	-0.294655	-0.193308	-0.413971	-0.281573	-0.590502	-0.713111	-0.65421	0.058406	-0.325706	-0.502236	-0.634634	0.382103	-0.512024	-0.423759	-0.127912	-0.492448	-0.448316	0.494925	-0.492448	-0.178539	-0.222672	0.746639	-0.198115	-0.0935679	-0.47768	-0.438354	-0.688555	-0.413971	-0.320725	-0.467892	-0.369838	0.524289	-0.178539	-0.379626	0.347758	0.491631	-0.301149	-0.105043	0.308606	-0.345282	-0.281573
		221	-0.513188	-0.146369	-0.214553	-0.17042	-0.513441	-0.424671	-0.812329	-0.292525	-0.513188	-0.302566	-0.455045	-0.577655	-0.518753	-0.459268	-0.268474	-0.445004	-0.342728	0.255553	-0.454792	-0.210077	-0.332687	-0.356991	-0.234634	0.368375	-0.513441	-0.0430823	-0.243665	-0.111267	0.250241	-0.220118	0.0489012	-0.0682232	-0.240199	-0.122065	0.0494061	-0.41066	0.0785177	1.25821	0.660941	0.0687297	0.377658	-0.1316	-0.243917	0.186864	-0.0526179	-0.366274	-0.0678914
		222	-0.528407	-0.288729	-0.347988	-0.406302	-0.56228	-0.591726	-0.58219	-0.586722	-0.60616	-0.527935	-0.371485	-0.40583	-0.341672	-0.659942	-0.410834	-0.410834	-0.195598	-0.0685941	-0.357051	-0.239478	-0.254384	-0.328078	-0.327605	-0.0387811	-0.56228	-0.249013	-0.386025	-0.405463	0.132575	-0.161253	0.204956	0.123039	0.0535108	-0.195598	0.097758	-0.415366	-0.0585862	0.718658	0.45501	-0.0242416	0.0146346	-0.224571	-0.400459	-0.156721	-0.239111	-0.0899218	0.017749
		223	-0.557511	-0.283488	-0.177061	-0.401062	-0.391352	-0.655174	-0.576949	-0.615825	-0.469577	-0.391352	-0.400589	-0.234903	-0.439465	-0.489015	-0.108565	-0.274251	-0.059015	0.164986	0.0765598	-0.13724	0.0478848	-0.15715	-0.322364	-0.205263	-0.557039	-0.0497781	-0.18679	-0.371914	0.0974346	0.272358	0.27285	0.0192098	0.487122	-0.224702	-0.0687243	-0.478814	-0.08769	0.986582	0.819932	0.0779965	-0.0488138	-0.156678	-0.332566	-0.0201388	0.0571217	-0.187715	-0.0113548
		224	-0.579634	0.0647396	-0.355633	-0.579634	-0.0362	-0.371322	-0.599072	-0.637948	-0.4917	-0.4917	-0.429636	-0.4917	-0.468512	-0.511138	-0.0593871	-0.452823	-0.472261	-0.0205109	0.125738	-0.472261	0.168363	-0.186197	-0.201886	-0.39076	-0.429636	0.376674	-0.0593871	-0.244512	-0.244512	0.314611	0.763678	-0.0167619	0.600675	-0.637948	0.123054	-0.429636	-0.429636	-0.0593871	0.542361	-0.4917	-0.39076	-0.4917	0.172112	0.0221143	-0.12145	0.622937	-0.118627
		225	-0.357621	0.416288	-0.463914	-0.53894	0.354224	0.232767	0.367656	0.367656	0.0800441	-0.191935	-0.129871	0.170704	-0.220531	-0.373254	0.0201823	-0.463914	-0.282594	-0.251796	0.0952092	0.442683	1.06387	0.307794	0.460517	0.142107	-0.0392118	0.566342	0.110842	0.0358151	0.307794	0.685597	0.856155	0.535544	0.913347	-0.357621	0.234969	-0.0392118	-0.220531	-0.161137	0.913347	-0.282594	-0.129871	-0.191935	-0.052643	0.0822457	-0.2232	0.734697	-0.0392118
		226	-0.409659	0.36425	-0.681638	-0.590978	0.1365	0.384805	0.315618	0.315618	0.474547	-0.00150735	0.634394	0.157055	-0.068493	0.225325	0.0449232	0.338741	0.520061	0.589248	-0.453888	0.429034	0.884534	0.294145	0.408479	0.0900696	-0.0912497	0.182931	-0.272569	0.226242	0.0900696	0.340576	1.04658	0.317819	0.36425	-0.409659	0.182931	0.112826	0.135583	0.0676799	0.772402	-0.092167	0.430318	-0.205583	0.34186	0.476749	-0.16007	0.886735	0.316902
		227	-0.311991	-0.235302	-0.556029	-0.49331	-0.17942	0.254723	0.483138	0.483138	0.516333	0.110131	0.476371	0.226782	-0.226516	0.23917	-0.155011	0.408468	0.561847	0.417255	-0.597941	0.484791	0.442879	0.192004	0.106529	0.0158693	-0.193391	-0.262946	-0.318828	0.235865	0.0577806	0.16436	0.256969	0.169544	0.0999885	-0.0605234	-0.137213	0.108478	0.0893235	-0.0624021	0.18682	-0.02244	0.286266	-0.0380632	-0.0900465	0.188769	0.00745009	0.227079	0.340495
		228	-0.483506	-0.366585	-0.521011	-0.483506	-0.408872	-0.410322	-0.380931	-0.4791	0.138285	-0.0286614	0.468471	-0.17648	-0.40554	0.118083	-0.210653	0.476209	0.546437	0.73176	-0.5302	-0.223173	-0.363253	-0.349658	-0.558516	-0.591239	-0.553734	-0.376525	-0.46513	-0.0338189	-0.451159	-0.130538	0.0452217	-0.404841	-0.293078	-0.199316	-0.250791	-0.284588	0.00846793	0.0959983	-0.0426318	-0.201464	0.049305	-0.275024	0.151504	0.133128	0.0676818	-0.0930329	0.143766
		229	0.374294	0.0231222	0.180758	0.686356	0.370913	-0.380721	0.0087762	-0.245423	0.539889	-0.125121	-0.114156	-0.146879	-0.609986	-0.308513	-0.0730658	-0.0764471	-0.396297	-0.493065	-0.218508	-0.115557	-0.489684	-0.476089	-0.0907931	-0.591609	-0.242042	-0.0648329	0.080609	-0.130279	-0.295498	-0.178953	0.0267775	-0.0151338	0.174645	0.112376	0.0609011	-0.0989564	-0.00997624	-0.0485062	-0.217107	-0.375939	-0.641308	-0.167408	-0.149031	-0.245423	-0.4669	-0.219463	-0.264756
		230	0.642088	0.0188649	0.706634	1.24017	0.596796	-0.112927	0.206718	-0.333503	0.863565	0.414725	-0.104443	-0.137166	-0.600273	0.043104	0.264581	0.219288	-0.358643	-0.183359	-0.222765	0.194149	-0.138067	-0.522257	-0.164903	-0.665719	-0.00218867	-0.222765	0.264581	-0.288211	-0.411519	-0.0927739	-0.242918	-0.242918	-0.164903	0.128703	0.0632571	0.043104	0.173995	0.219288	-0.235335	0.205818	-0.645565	-0.255488	-0.0349115	-0.333503	-0.268958	0.466701	-0.436658
		231	0.644442	-0.109673	0.561222	1.13592	0.459821	-0.0862878	0.176349	-0.478915	0.693867	0.384355	-0.478915	0.160717	-0.606356	0.176349	0.438985	0.680786	-0.528341	-0.213729	0.025522	0.311544	0.184103	-0.208525	0.288158	-0.393145	0.204939	-0.0810835	0.545591	-0.0810835	0.0827019	-0.0576978	-0.216279	-0.322884	-0.244869	0.0983332	-0.0082723	-0.0368623	0.0697432	0.467575	-0.478915	0.519551	-0.471161	0.451944	0.204939	0.160717	0.0774976	0.329725	-0.0733291
		232	-0.19069	-0.378979	-0.215613	-0.0112738	-0.39503	-0.39503	-0.19069	-0.59219	-0.199562	0.290799	-0.396723	0.0474429	-0.387851	-0.0929568	-0.084085	0.333465	-0.681052	-0.0929568	-0.263502	0.217988	0.422327	-0.165768	-0.156896	-0.272373	0.0136486	-0.370107	0.120254	-0.0769062	0.536111	0.10251	-0.387851	-0.59219	-0.689924	-0.19069	-0.101829	-0.110701	-0.297296	0.413455	-0.396723	0.699477	-0.272373	0.456121	0.404583	-0.0502907	0.511189	0.372482	0.0474429
		233	-0.52167	-0.423936	-0.94209	-0.354588	-0.507059	-0.616534	-0.30272	-0.637147	-0.202117	0.0569598	-0.386943	0.440386	-0.268596	-0.204986	-0.0866395	0.221435	-0.835484	-0.642887	-0.527409	-0.386679	0.419772	0.391387	0.0170964	-0.0983809	-0.0983809	-0.52454	0.0629621	0.644462	0.983791	0.318906	0.388254	0.29339	-0.406456	-0.08377	-0.542283	0.0509575	-0.0261629	0.301425	0.21517	0.629851	0.175307	0.575376	0.949404	0.287914	0.508634	-0.147379	-0.0522521
		234	-0.74381	-0.286224	-0.231314	-0.11027	-0.622594	0.227537	-0.52486	-0.406175	-0.197701	0.314623	0.203882	-0.328127	-0.144229	0.0526766	-0.415385	0.292578	-0.351265	-0.625125	-0.84281	-0.822031	-0.122184	0.55579	0.194844	0.0526766	0.292578	-0.973236	0.347316	0.555617	0.815032	0.69652	1.11238	0.884215	0.184369	-0.185959	0.181837	0.521831	0.458056	0.585779	0.686044	0.434401	0.0864626	0.0734556	0.86056	-0.480598	0.0732831	-0.142963	-0.340962
		235	-0.60887	-0.0965028	-0.151155	-0.204102	-0.466177	0.231439	-0.542434	-0.445226	-0.313009	0.101581	-0.183151	-0.59595	-0.281013	-0.138889	-0.280445	0.329785	-0.271106	-0.740433	-0.707869	-0.958815	-0.585474	0.516739	0.101013	0.318655	0.4823	-0.762038	0.613294	0.473614	0.744858	0.843289	1.35688	1.22645	0.243052	0.177753	0.502597	0.897372	0.974284	0.558557	0.604041	0.10215	0.276184	-0.161062	0.430575	-0.193143	-0.280445	0.58056	0.0012744
		236	-0.511641	0.000726036	0.0555489	-0.380561	-0.625769	0.294935	-0.702026	-0.385868	-0.544205	-0.146482	-0.140659	-0.974492	-0.347997	-0.222739	-0.47377	0.170193	-0.102273	-0.462125	-0.39169	-0.625769	-0.7788	0.0497263	-0.0585792	0.196934	0.360578	-0.517464	0.512577	0.0317425	0.463061	0.468884	0.670915	0.620367	0.0118555	-0.0114351	0.860784	0.577705	0.545141	0.474706	0.0822902	-0.347997	-0.157095	-0.265917	-0.385868	-0.479077	-0.549512	0.446109	0.304724
		237	-0.340238	-0.0158937	-0.406838	-0.654924	-0.454366	-0.493268	-0.530623	-0.54028	-0.664582	-0.111223	-0.39718	-0.511309	-0.588324	-0.445224	-0.474196	-0.292194	-0.186965	-0.616538	0.00342091	-0.54028	-0.693311	-0.550454	-0.520966	-0.111466	0.070021	0.117549	0.22202	-0.12267	0.670149	0.126448	0.346321	0.535675	-0.50241	0.0400174	0.278447	0.183391	0.632279	0.0982344	-0.0542803	-0.0728364	0.118065	-0.110707	-0.368451	-0.187723	0.223294	0.497562	0.374019
		238	-0.526755	0.124413	-0.281061	-0.293111	-0.245067	-0.131455	-0.404846	-0.0114223	-0.219246	0.0145537	-0.195146	-0.0732375	-0.698584	0.0763689	-0.181375	-0.478711	-0.220967	-0.490761	0.136463	-0.650541	-0.25524	-0.500934	0.160407	-0.526755	0.210327	0.0145537	-0.0334901	0.253673	0.421904	-0.205319	0.334113	0.363687	0.0264484	-0.215493	0.189981	0.421749	0.384033	0.00250401	0.322063	-0.183097	-0.0611878	-0.0611878	0.160407	-0.207196	0.0367766	-0.215493	0.0422514
		239	-0.458054	0.108886	-0.296588	-0.308637	-0.222723	-0.222723	-0.382502	0.0109217	-0.234773	-0.0388438	-0.210673	-0.0508935	-0.545655	0.1072	0.0179122	-0.372139	-0.114395	-0.384189	0.205164	-0.628197	-0.308637	-0.217419	0.266979	-0.373825	0.363257	-0.0388438	0.127926	0.0109217	0.292765	-0.296588	0.280715	0.120936	0.263606	-0.298274	0.0229714	0.414709	0.376993	0.0333347	0.52135	-0.0301669	-0.0388438	0.129613	0.351207	-0.0542663	0.143349	-0.298274	0.043698
		240	-0.253453	-0.137342	-0.317402	-0.227372	-0.297122	-0.157622	-0.387152	0.092187	-0.137342	-0.387152	-0.456902	-0.227372	-0.238975	-0.0531142	0.185092	-0.392953	-0.392953	-0.302923	-0.073394	-0.616681	-0.297122	0.159011	0.246165	-0.238975	0.100864	-0.317402	-0.0647171	0.231687	-0.227372	-0.247652	0.0719071	-0.157622	0.414622	-0.302923	-0.137342	0.495974	-0.073394	0.0661057	0.275122	-0.238975	-0.456902	-0.00944566	0.330393	0.0108342	-0.323203	-0.372673	-0.148945
		241	-0.297567	-0.563101	-0.325906	-0.395656	-0.660795	-0.423601	-0.395656	-0.297962	-0.270017	-0.102573	-0.563101	-0.493351	-0.283089	-0.576567	-0.045277	-0.0462891	-0.241678	-0.213734	-0.339373	-0.465406	-0.660795	0.248201	-0.143984	-0.185395	-0.324894	-0.325906	-0.0732217	-0.256157	-0.297962	-0.353851	-0.0607675	-0.228212	-0.0732217	-0.311428	-0.270017	-0.409123	0.1491	-0.102178	0.178057	-0.185395	-0.465406	-0.115645	-0.0597554	-0.0597554	0.0234607	-0.0880943	-0.255144
		242	-0.0881458	-0.170905	0.164836	-0.200553	-0.268599	-0.42559	-0.299099	-0.201404	-0.272006	0.191077	-0.170905	-0.396793	-0.256442	-0.367145	-0.102858	-0.231052	-0.327895	-0.201404	-0.327043	-0.171756	-0.465691	0.204938	0.459623	0.235437	-0.00260857	-0.229349	-0.0322565	0.136039	-0.201404	-0.35584	0.528521	-0.230201	-0.0322565	-0.397645	-0.272006	-0.101155	0.457068	0.402882	0.51466	0.333983	0.419521	0.108095	0.558169	-0.0331082	0.528521	0.121327	-0.228497
		243	-0.426886	-0.0313973	0.164843	-0.330043	-0.32834	-0.425582	-0.42859	-0.131647	0.0667499	0.0615863	-0.230646	-0.526284	-0.525432	-0.426886	0.166148	-0.430293	-0.327887	-0.330895	-0.127787	-0.231497	-0.525432	-0.133803	0.45963	0.364943	0.0671489	-0.42859	-0.0322489	0.0662973	-0.330895	-0.226334	0.458779	-0.230193	-0.231497	-0.527136	-0.132498	-0.0313973	0.656324	0.26339	1.45116	0.46349	0.559028	-0.0313973	0.558176	-0.232349	0.458779	0.260835	0.767752
		244	0.165071	0.866268	-0.0436916	-0.135176	-0.139785	0.270382	-0.233722	0.167227	0.0662281	0.770175	-0.139785	-0.637125	-0.135176	-0.238331	0.465022	-0.430815	-0.13302	-0.0320212	0.366475	0.366772	0.066525	-0.238331	0.355102	0.859206	0.561412	-0.233722	-0.0390828	-0.142238	-0.637125	0.0662281	0.861659	-0.536422	0.165071	-0.53397	-0.334721	0.261164	0.460413	0.659958	1.65865	1.36115	1.1573	0.0594633	0.453648	-0.135176	0.0548545	-0.240784	1.06031
		245	-0.160959	0.528166	-0.566814	-0.276186	-0.564361	0.499412	-0.36266	0.0382897	0.122311	0.444145	-0.477887	-0.679588	-0.0167645	-0.391413	0.410486	-0.276186	-0.163411	0.011989	0.410486	0.300164	0.011989	-0.391413	-0.365113	0.410486	0.0382897	-0.276186	-0.278639	-0.48034	-0.679588	0.122311	0.585886	-0.566814	-0.160959	-0.564361	-0.365113	-0.0769376	0.122311	0.124763	1.29641	0.727414	0.326465	-0.278639	-0.278639	-0.189712	-0.48034	-0.393866	1.09225
		246	0.000801382	0.330517	-0.764462	-0.114426	-0.24244	0.782245	0.119421	0.000801382	0.0457345	1.40671	-0.476288	-0.838149	-0.175325	-0.229653	0.173749	-0.274586	-0.521221	0.333909	0.0135885	0.141603	0.0135885	-0.229653	-0.402601	0.333909	-0.159359	-0.114426	0.324515	0.282974	-0.0373469	0.366055	1.02888	-0.444142	0.481283	-0.562761	-0.402601	0.366055	0.205895	0.407596	0.942405	0.490677	0.449137	-0.316127	-0.155967	-0.188113	-0.357668	-0.751675	-0.261799
		247	-0.231904	-0.305591	-0.161182	-0.260871	-0.0717436	0.232397	-0.142465	-0.231904	-0.331593	0.338016	-0.536473	-0.696633	-0.552653	0.0564847	0.0564847	-0.0747084	-0.667666	0.101204	-0.103676	-0.0619212	-0.219117	0.171926	0.114419	-0.245119	-0.161182	0.085452	1.3033	1.11714	0.450492	0.796816	0.248149	0.159139	0.017695	-0.507506	-0.116463	0.21961	-0.171433	0.405773	0.62344	0.085452	-0.216152	-0.260871	-0.100711	-0.103676	0.245612	-0.148395	-0.292804
		248	-0.129576	-0.289736	-0.0588541	-0.245017	0.0305845	0.0753038	-0.0401373	-0.129576	-0.315739	0.440344	-0.520619	-0.680779	-0.79622	-0.0141348	-0.0141348	-0.0588541	-0.565338	0.0305845	-0.123453	-0.219015	-0.289736	0.101306	0.216748	-0.315739	-0.0588541	0.101306	1.31915	1.13299	0.466347	0.81267	0.00458196	0.261467	0.120023	-0.405178	-0.0141348	0.235464	-0.155578	0.421627	0.466347	0.152149	-0.200298	-0.245017	-0.0340141	-0.174295	0.312309	-0.219015	-0.449897
		249	-0.0661068	0.445282	0.42047	0.0741465	-0.0661068	-0.437242	-0.0412946	-0.0661068	-0.668125	-0.552683	-0.296989	-0.0412946	-0.668125	0.0493344	-0.20636	0.42047	-0.437242	-0.321801	0.355871	0.164776	0.700976	0.164776	0.280217	-0.156736	0.42047	-0.0909189	1.25337	0.907047	-0.20636	0.139963	-0.41243	0.164776	0.470094	-0.181548	0.0493344	0.329841	-0.41243	0.931859	0.305029	-0.0400763	-0.296989	0.329841	0.380683	0.560723	0.471313	0.42047	-0.321801
		250	-0.256391	0.345893	-0.0461437	0.0447511	-0.165496	-0.42119	-0.0461437	-0.256391	-0.512085	-0.557533	-0.301838	-0.0461437	-0.512085	-0.301838	-0.557533	-0.0461437	-0.557533	-0.512085	0.00469881	-0.301838	0.465245	-0.210943	-0.256391	-0.000696305	-0.0461437	-0.42119	0.254998	0.209551	-0.557533	-0.512085	-0.301838	-0.210943	0.465245	-0.301838	-0.256391	0.209551	-0.301838	0.465245	-0.000696305	-0.461243	-0.301838	0.209551	0.260393	0.209551	0.00469881	0.0901986	-0.375743
		251	-0.346865	0.290819	-0.136618	-0.0457229	-0.220569	-0.511664	-0.101217	-0.276064	-0.602559	-0.648007	-0.392312	-0.136618	-0.531758	-0.356912	-0.648007	-0.136618	-0.648007	-0.602559	-0.0658167	-0.321511	0.410172	-0.266017	-0.311464	-0.0557698	-0.101217	-0.405463	0.164524	0.189878	-0.577206	-0.531758	-0.179909	-0.195216	0.516373	-0.321511	-0.346865	0.119077	-0.392312	0.410172	-0.0557698	-0.567159	-0.25071	0.189878	0.154477	0.119077	-0.136618	0.318329	-0.324615
		252	-0.650447	-0.0342084	-0.0426367	-0.605	-0.0342084	-0.0696089	0.156078	-0.416332	-0.160504	-0.369266	-0.205951	-0.695895	-0.416332	-0.660494	-0.0426367	-0.205951	-0.205951	-0.323818	-0.13515	-0.461779	-0.170551	-0.569599	-0.125103	-0.125103	0.646022	0.853165	0.492754	-0.625094	-0.625094	-0.579646	0.00645194	-0.00885477	-0.554293	-0.298465	0.00281075	-0.369266	-0.53258	-0.49718	-0.288418	-0.451732	-0.0643491	-0.298465	-0.170551	-0.205951	-0.369266	0.0856813	-0.372503
		253	-0.765097	-0.239752	0.148955	-0.765097	0.0210414	-0.144756	0.217274	-0.530981	-0.144756	-0.177674	-0.275153	-0.6347	-0.400584	-0.729696	-0.111838	-0.275153	-0.0143591	-0.438468	-0.204352	-0.530981	0.0210414	-0.729696	-0.109356	0.0210414	0.707217	0.647621	0.378105	-0.172708	-0.563899	-0.172708	-0.0627498	0.0918425	-0.362701	-0.23727	0.279352	-0.438468	-0.601782	-0.566382	-0.403067	-0.305588	-0.00315394	0.0235244	-0.239752	-0.275153	0.213517	0.140931	-0.101907
		254	-0.596261	0.0573058	0.317791	-0.759884	-0.0909582	-0.057732	0.350709	-0.59657	-0.139544	0.0729736	-0.106317	-0.711299	-0.384361	-0.841696	-0.188438	-0.106317	0.072665	-0.269632	0.139117	-0.432946	0.236288	-0.841696	0.105891	-0.00914658	0.922464	0.628444	0.301506	-0.238296	-0.465864	-0.0746731	-0.188129	-0.0909582	-0.253655	-0.38467	0.284565	-0.351443	-0.59657	-0.432946	-0.433255	-0.417587	0.105891	-0.123876	0.139117	0.139117	0.382353	-0.0906495	0.0889501
		255	-0.441517	-0.277894	-0.180723	-0.60514	-0.426158	-0.392932	-0.096816	-0.60514	-0.474743	-0.0989116	-0.227213	-0.342251	0.0356766	-0.686952	-0.686952	-0.441517	-0.262535	-0.227213	0.0182218	-0.441517	0.544001	-0.258344	-0.229309	-0.130042	-0.229309	-0.523329	-0.472648	-0.0835525	-0.31112	0.0800707	-0.523329	-0.426158	-0.0989116	-0.556555	-0.213949	-0.309025	-0.60514	-0.227213	-0.60514	-0.211854	-0.229309	-0.295761	0.0182218	0.232526	0.210468	-0.262535	0.243694
		256	-0.126842	0.036781	-0.228618	-0.392241	-0.575828	-0.412204	-0.0143133	-0.494016	-0.494016	-0.248581	-0.0143133	-0.361523	0.0164039	-0.575828	-0.575828	-0.330393	-0.310429	-0.116089	0.231121	-0.330393	0.496107	-0.147219	-0.146806	-0.279712	-0.248581	-0.412204	-0.361523	-0.392241	-0.330393	-0.228618	-0.412204	-0.474052	-0.146806	-0.575828	-0.392241	0.00565044	-0.392241	-0.0143133	-0.392241	-0.259748	-0.146806	-0.474052	0.231121	0.547201	-0.228618	-0.412204	-0.16677
		257	0.339711	-0.0565774	-0.257425	-0.158353	-0.3592	-0.161056	0.353168	0.13616	-0.161056	-0.458272	-0.0431206	-0.0458239	0.0694082	-0.061984	-0.3592	-0.458272	-0.257425	0.0532481	-0.142193	-0.3592	0.682704	-0.0296638	-0.257425	-0.0458239	-0.260128	-0.3592	0.251392	-0.0592807	-0.557344	-0.257425	0.037088	-0.257425	-0.356497	0.037088	-0.356497	0.0586547	-0.158353	-0.142193	-0.0592807	-0.142193	0.0397913	-0.257425	-0.142193	0.471103	-0.158353	-0.260128	-0.260128
		258	0.71402	0.317731	-0.414398	0.00344346	-0.0911476	-0.105516	0.938198	0.0854436	-0.105516	-0.296476	-0.308141	0.220437	-0.30366	-0.00644414	-0.30366	-0.0839633	-0.201885	-0.105516	-0.300957	-0.516173	0.520357	0.128549	0.0106277	0.00792442	-0.0983319	-0.30366	0.198884	0.102516	-0.608061	-0.201885	-0.119885	-0.0956286	0.124068	0.0926279	-0.194701	0.00614677	0.215956	0.336581	0.102516	-0.0884443	0.307844	-0.0956286	-0.0884443	0.416804	-0.102813	-0.0983319	-0.310845
		259	0.585411	0.527888	-0.271848	0.315376	0.491943	0.477574	1.25013	-0.00899728	-0.0305743	-0.221534	-0.334975	0.295379	-0.0593355	0.0684978	0.448813	0.329744	-0.0593355	0.477574	-0.158408	-0.271848	0.32414	0.0341084	-0.185589	-0.0865165	-0.192773	-0.398101	0.104443	0.0756821	-0.533119	-0.228718	-0.0449428	-0.291845	0.0972349	-0.001813	-0.0521512	-0.291845	0.358506	0.648513	0.245065	0.223488	0.28101	-0.122462	0.223488	0.457578	0.0397365	0.315376	-0.405285
		260	0.398961	0.637531	-0.363721	0.124431	0.199679	0.187558	0.761969	-0.496034	-0.220395	0.487035	-0.12626	0.505217	-0.0510125	-0.1202	0.557332	0.637531	-0.0510125	0.387949	-0.151208	-0.163329	-0.0649485	-0.159084	-0.377657	-0.0770698	-0.283522	-0.289582	-0.283522	0.0862524	-0.627239	-0.420787	-0.232517	0.0170652	0.405021	-0.59017	0.255635	-0.183326	0.568344	0.755908	0.656418	0.030296	-0.30847	-0.0139433	0.230687	0.468148	-0.0510125	0.0242353	-0.59623
		261	0.0641268	0.302697	-0.211333	0.0241397	-0.0729588	0.149463	-0.0419503	-0.449903	-0.28052	0.320654	-0.0801289	0.0641268	-0.0891074	-0.158295	0.519237	0.280667	-0.111137	0.349854	-0.211333	-0.0109417	-0.528069	-0.75049	-0.628264	-0.305647	-0.449903	-0.327677	-0.427873	-0.0801289	-0.581107	-0.480912	-0.0801289	-0.127286	-0.0360689	-0.650294	0.111284	-0.349707	0.18945	0.0582454	0.490037	-0.242342	-0.581107	-0.180325	-0.0419503	0.0892539	-0.111137	-0.142146	-0.550099
		262	-0.0913851	-0.191581	-0.430442	-0.364352	-0.736619	-0.302626	-0.00729904	0.198682	0.198682	0.0593562	-0.129855	0.120186	-0.202431	-0.102235	-0.313806	-0.107825	0.304468	-0.419592	-0.324656	-0.230051	0.332088	0.109667	-0.402822	-0.291776	-0.224461	-0.208021	-0.0966449	0.716431	0.321238	-0.319066	-0.129855	-0.113415	0.54892	-0.21328	0.209532	-0.230051	-0.0296593	-0.0128891	0.905642	-0.20769	-0.20769	0.193092	-0.324656	-0.129855	-0.436032	0.104077	0.415844
		263	-0.362868	-0.782266	-0.552781	-0.318932	-0.490807	-0.424965	0.205881	0.227787	-0.275491	-0.0933155	-0.72054	-0.570694	0.0783125	-0.00556707	-0.636537	-0.530751	0.165813	-0.658443	-0.363116	-0.217262	0.293629	0.355479	-0.257206	-0.278988	-0.279236	-0.195232	0.100219	0.377385	0.65093	0.245948	-0.0495032	-0.384898	0.209873	0.351734	0.122125	-0.468901	-0.217262	-0.403183	0.83685	0.709158	0.541399	0.0381213	-0.363116	-0.0495032	-0.742446	0.417452	0.545144
		264	-0.340119	-0.913129	-0.409165	-0.0109869	-0.423998	-0.380186	0.656722	0.678628	0.0217374	0.0503001	-0.346505	-0.624751	0.0462854	0.269631	-0.514951	-0.716391	-0.074603	-0.383244	-0.2195	0.00315955	0.338408	0.499094	0.0179924	-0.256239	-0.366039	-0.0736468	-0.239034	0.521	0.717739	0.543176	0.324532	-0.0328931	0.693461	0.802575	0.397323	0.365972	0.156772	-0.105955	1.3645	0.852774	0.838627	0.181737	0.0877256	0.478144	-0.368412	0.637874	0.304728
		265	-0.407217	-0.82934	-0.431162	-0.0329833	-0.340209	-0.507968	0.36247	0.278591	-0.3783	0.239875	-0.0667256	-0.601646	-0.0814967	0.141849	-0.129386	-0.285723	-0.731314	-0.193669	-0.0455059	0.132051	-0.122312	0.0383737	0.493763	-0.0215615	-0.342933	-0.246531	-0.62349	-0.49817	-0.256329	0.460496	0.151647	0.352672	0.338526	0.915885	0.359746	0.494863	0.58744	-0.29442	1.00956	0.407635	0.846152	0.0383737	-0.0400565	0.456148	0.469818	0.132051	-0.714443
		266	-0.558766	-0.651528	-0.421108	-0.145671	-0.452896	-0.31784	0.127042	0.172061	0.243541	-0.37609	0.156105	-0.378815	-0.439665	0.00261597	-0.0743138	-0.0505767	-0.80514	0.18269	0.285835	-0.0583582	0.209029	0.0157235	0.471112	-0.302008	-0.455621	-0.391922	-0.672686	-0.526978	-0.227803	0.0184482	-0.161503	0.156105	0.57983	0.473837	0.079299	0.601111	0.397031	-0.0265705	0.399755	-0.331071	0.275206	-0.0743138	0.0211729	0.278054	0.563751	-0.0583582	-0.91101
		267	-0.245915	-0.335707	-0.48635	-0.441331	-0.140046	0.145653	-0.0947817	0.251522	0.476615	-0.140046	-0.290197	-0.1398	-0.351294	-0.0655952	-0.139555	0.191408	-0.335707	-0.186806	0.220594	-0.351048	0.0699516	-0.20016	0.101616	-0.441085	-0.441085	-0.457163	-0.427731	-0.592219	-0.0655952	-0.200406	-0.306521	0.16173	0.130557	0.252013	0.312373	-0.00474444	0.553298	-0.0947817	0.854338	-0.0950272	0.50828	0.312373	0.552562	0.280708	0.870661	-0.351048	-0.742862
		268	-0.154154	-0.430863	-0.401361	-0.572516	-0.235202	0.3027	-0.160681	0.257681	0.230571	-0.127115	-0.579043	-0.241728	-0.410421	-0.196781	-0.464429	-0.212297	-0.394834	-0.173875	-0.10428	-0.525034	-0.326981	-0.525034	-0.525034	-0.615072	-0.615072	-0.365402	-0.227883	-0.500458	-0.0526644	-0.410421	-0.178731	-0.127115	0.0218568	-0.151691	0.0955857	-0.178731	0.29371	-0.304797	0.457405	-0.0460673	0.104575	-0.0125014	0.637551	0.185552	0.20121	-0.525034	-0.651101
		269	-0.232617	-0.340775	-0.389786	-0.547075	-0.249017	0.153828	-0.219515	0.232342	-0.0394897	-0.14093	-0.553601	-0.255544	-0.475017	-0.435689	-0.458616	-0.386558	-0.324374	-0.533973	-0.478244	-0.609259	-0.700945	-0.609259	-0.58963	-0.628887	-0.609259	-0.43576	-0.517572	-0.416132	-0.232688	-0.455388	-0.190203	-0.101673	-0.281698	-0.216287	0.179912	-0.307973	0.248743	-0.363631	0.412438	-0.0460161	0.124255	-0.0066883	0.572955	-0.0198613	0.212785	-0.393347	-0.547146
		270	-0.520757	-0.351685	-0.250053	-0.787107	-0.537158	-0.158367	-0.103836	-0.33303	-0.604861	-0.555659	-0.769579	-0.0132773	0.297657	-0.826363	0.187469	-0.120237	-0.335284	-0.243598	0.167841	-0.445472	-0.41057	-0.318883	-0.0460787	-0.211924	-0.318883	-0.422616	0.532332	-0.0232227	0.00957864	0.317285	-0.327702	-0.896167	-0.0153778	0.152567	0.37407	0.314057	-0.0634526	-0.121364	0.0280797	-0.334157	-0.441117	-0.57206	0.188597	-0.0788801	-0.250053	-0.609324	0.122994
		271	-0.492861	-0.287759	-0.366273	-0.65901	-0.44509	-0.346644	-0.220056	-0.521307	-0.540936	-0.599821	-0.81374	-0.093468	0.325553	-0.726409	0.179337	-0.200428	-0.307388	-0.287759	0.159708	-0.453604	-0.318502	-0.327016	-0.0542113	-0.220056	-0.327016	-0.394719	0.452141	0.00467372	-0.034583	0.345182	-0.335834	-0.912186	-0.211542	0.0723769	0.25785	0.305925	-0.259617	-0.065326	0.0920052	-0.414347	-0.521307	-0.580192	0.0723769	-0.0149546	-0.366273	-0.617457	0.15089
		272	-0.136891	0.193241	0.193241	-0.361925	0.298338	-0.213846	0.116286	-0.467022	-0.263479	0.143608	-0.109569	-0.164213	0.215551	0.0170196	0.292507	0.116286	0.396784	-0.213846	0.292507	-0.340434	0.0178394	-0.417389	-0.164213	0.319829	-0.417389	0.0666525	0.749226	0.0393303	0.242874	0.622638	0.677283	-0.818645	0.347971	0.776549	0.49605	0.215551	0.221383	0.881646	0.165919	-0.340434	-0.670566	-0.670566	0.165919	-0.164213	-0.213846	0.0939748	0.165919
		273	0.272166	0.334562	0.758003	0.723749	0.566247	-0.354819	-0.151276	-0.495966	0.131019	0.255811	0.255811	-0.276068	-0.134921	0.679252	0.209769	-0.292423	0.255811	-0.0725248	-0.495966	-0.354819	-0.123133	-0.699509	-0.558362	-0.0888792	-0.699509	0.616856	-0.0101285	-0.354819	-0.292423	-0.151276	0.662898	-0.326677	0.0804099	0.114664	-0.292423	-0.558362	-0.0607372	0.34635	-0.354819	-0.495966	-0.699509	-0.558362	-0.213672	-0.558362	-0.213672	0.600502	-0.495966
		274	0.409697	0.472094	1.03675	0.550709	0.534422	-0.358502	-0.296173	-0.358434	-0.0138791	0.393343	0.252128	-0.279751	-0.138604	0.675569	0.206086	-0.154891	0.534558	0.347436	-0.499649	-0.358502	-0.296173	-0.420763	-0.420831	-0.0925622	-0.844407	0.613173	-0.0138115	-0.358502	0.127538	-0.296173	0.80043	0.0651421	0.1898	0.110981	-0.43732	-0.70326	-0.0925622	0.455739	-0.217287	-0.640864	-0.279548	-0.562045	-0.0761402	-0.562045	-0.0761402	0.738033	-0.499649
		275	0.284088	0.0358591	0.493433	0.264477	-0.158896	-0.38765	-0.582405	-0.22696	-0.193029	-0.299976	-0.280568	-0.212437	0.249955	0.142873	0.0163161	-0.494664	0.108943	0.371829	-0.582338	-0.38765	-0.154079	-0.139286	-0.407057	-0.582338	-0.723552	0.176939	-0.300043	-0.548272	-0.212234	-0.421783	-0.0322717	0.464321	-0.246435	-0.368174	-0.348766	-0.207619	-0.314633	-0.22696	-0.0322717	-0.670011	-0.158694	0.0406769	0.162416	-0.38765	-0.0517471	0.162416	-0.635878
		276	-0.267709	-0.374791	-0.340658	-0.593441	-0.569546	-0.516005	-0.710761	-0.214168	-0.603679	-0.428331	-0.174285	-0.623087	-0.301842	-0.174285	-0.441989	-0.247234	0.0979066	-0.0388204	-0.569546	-0.516005	-0.282434	-0.126494	-0.535413	-0.569546	-0.710761	-0.516005	-0.569546	-0.676628	-0.199443	-0.550138	-0.160627	0.570604	-0.140152	-0.120744	0.0159827	-0.218656	-0.184523	0.0204703	-0.0433081	-0.539901	-0.145902	-0.0876787	-0.107086	-0.398686	-0.32125	0.127552	-0.505768
		277	-0.464145	-0.946524	-0.453129	-0.507448	-0.699827	-0.270988	-0.587237	-0.260485	-0.555215	-0.512178	-0.342096	-0.152891	0.0932946	0.0707323	-0.121912	-0.105901	0.398263	-0.104858	-0.399588	-0.120869	-0.0838511	-0.276496	-0.0187824	-0.13688	-0.437118	-0.158398	0.0132396	-0.131372	-0.19042	0.0612726	0.431063	0.542096	0.0762401	0.311922	0.552334	0.505345	0.0980245	0.79981	0.323203	0.559398	-0.624767	-0.1429	0.146835	-0.078609	-0.292507	0.193825	-0.448399
		278	-0.367051	-1.0491	0.0626306	-0.556487	-0.544363	0.0354386	-0.636276	-0.319184	-0.506833	-0.356714	-0.449506	-0.0461374	0.390061	-0.343433	-0.0638697	-0.1014	0.388274	0.0457764	-0.039621	-0.121197	-0.458965	-0.179402	0.550518	-0.0836672	-0.486157	-0.0564752	-0.138051	0.0289222	-0.28817	0.158366	0.523326	0.420196	-0.0263399	-0.0535319	-0.0759941	0.183771	-0.423222	0.332104	-0.0957916	0.559069	-0.162548	-0.367051	0.0833062	0.125566	-0.550879	-0.176459	-0.239394
		279	-0.431008	-1.07644	0.0352961	-0.737763	-0.535075	0.0813485	-0.626989	-0.346518	-0.57079	-0.42067	-0.711479	-0.073472	0.399349	-0.568783	-0.289221	-0.32675	0.243621	0.0916863	0.0795334	-0.148532	-0.449678	-0.133492	0.523183	-0.111002	-0.330381	-0.0838098	-0.128764	0.148077	-0.205638	0.204276	0.605858	0.158223	-0.251691	-0.315505	-0.382042	0.0757397	-0.531254	0.0701308	-0.130579	0.524282	-0.189883	-0.394386	0.165838	-0.019088	-0.614836	-0.328565	-0.200937
		280	-0.269178	-0.608004	-0.0280524	-0.713319	-0.229492	0.0116339	-0.640075	-0.403501	-0.508816	-0.302736	-0.505752	-0.505752	0.179515	-0.775885	-0.571382	-0.502688	-0.301249	-0.0906177	0.016185	-0.437059	-0.537823	-0.296698	-0.0280524	-0.505752	-0.493586	-0.334807	-0.742326	-0.29057	-0.463002	-0.296698	-0.0204373	-0.198997	-0.571382	-0.641562	-0.601876	-0.400437	-0.638498	-0.606427	-0.531695	-0.258499	-0.0280524	-0.0951689	-0.260076	-0.163862	-0.678184	-0.498137	-0.220389
		281	-0.463338	-0.495409	-0.426716	-0.600725	-0.3214	-0.284778	-0.52748	-0.495409	-0.600725	-0.394645	-0.495409	-0.495409	-0.3214	-0.458787	-0.458787	-0.390094	-0.495409	-0.284778	-0.280227	-0.426716	-0.52748	-0.490858	-0.426716	-0.495409	-0.380992	-0.426716	-0.52748	-0.280227	-0.248156	-0.490858	-0.316849	-0.495409	-0.458787	-0.426716	-0.284778	-0.390094	-0.3214	-0.289329	-0.316849	-0.248156	-0.426716	-0.289329	-0.299106	-0.358023	-0.463338	-0.385543	-0.312298
		282	0.624433	-0.345591	-0.276898	-0.414284	-0.208204	-0.208204	0.487046	-0.345591	-0.414284	-0.208204	-0.345591	-0.345591	0.693126	-0.345591	-0.345591	-0.276898	-0.345591	0.693126	-0.276898	-0.276898	-0.414284	-0.414284	-0.276898	-0.345591	-0.414284	-0.276898	-0.414284	-0.276898	-0.208204	-0.414284	-0.276898	-0.345591	-0.345591	-0.276898	-0.208204	-0.276898	-0.208204	-0.139511	-0.276898	-0.208204	-0.276898	-0.139511	-0.259154	-0.208204	-0.276898	-0.345591	-0.345591
		283	0.564264	-0.447164	-0.447164	-0.226969	-0.447164	-0.337067	0.344069	-0.447164	-0.447164	-0.447164	-0.226969	-0.226969	0.564264	-0.447164	-0.337067	-0.337067	-0.447164	0.344069	-0.337067	-0.337067	-0.226969	-0.337067	-0.447164	-0.337067	-0.337067	-0.337067	-0.557262	-0.447164	-0.337067	-0.337067	-0.557262	-0.337067	-0.226969	-0.447164	-0.557262	-0.226969	-0.337067	-0.226969	-0.447164	-0.447164	-0.557262	-0.226969	-0.402132	-0.447164	-0.447164	-0.00677401	0.323519
		284	0.447344	-0.457841	-0.457841	0.0810838	-0.564084	-0.347743	0.439635	-0.564084	-0.564084	-0.564084	-0.237646	-0.343889	0.447344	-0.564084	-0.2415	-0.2415	-0.351598	0.333392	-0.453987	-0.2415	0.0810838	-0.2415	-0.245354	-0.453987	-0.347743	-0.135257	-0.355452	-0.457841	-0.347743	-0.347743	-0.674182	-0.347743	-0.343889	-0.351598	-0.674182	-0.237646	-0.453987	-0.343889	-0.564084	-0.457841	-0.674182	-0.237646	-0.567938	-0.351598	-0.564084	-0.123694	0.312842
		285	-0.460009	-0.492868	-0.463863	0.0170515	-0.657122	-0.411776	-0.438712	-0.483091	-0.512096	-0.570106	-0.272673	-0.291901	-0.314983	-0.483091	-0.189512	-0.131501	-0.299609	-0.631971	-0.285978	-0.102496	0.0460567	-0.218517	-0.251376	-0.460009	-0.26675	-0.199289	-0.361474	-0.579884	-0.382771	-0.382771	-0.564183	-0.32476	-0.407921	-0.444635	-0.767219	-0.301678	-0.489014	-0.378916	-0.599111	-0.434858	-0.622193	-0.0406316	-0.544955	-0.386625	-0.541101	-0.245737	0.190799
		286	-0.647159	0.013242	-0.15214	-0.280196	-0.539787	0.178624	-0.0168919	0.0230195	-0.00598569	0.130391	-0.375533	0.382789	0.0810298	-0.365756	0.0121133	-0.124264	-0.182274	-0.404538	-0.27874	0.293516	0.331972	-0.211279	0.0603461	-0.063996	-0.4539	0.196723	-0.328429	-0.462549	-0.375533	-0.569921	-0.33675	-0.51191	-0.705169	-0.521688	-0.734174	-0.404538	-0.287389	-0.481776	-0.287389	-0.123135	-0.00598569	0.439671	-0.317523	-0.0749023	-0.229378	-0.568792	-0.462549
		287	-0.735465	-0.181307	-0.249644	-0.647906	-0.57957	0.0325981	-0.172115	0.0317595	0.0998004	0.284701	-0.424513	0.682668	0.186816	-0.0173542	0.0509821	-0.0853951	-0.240452	-0.550564	-0.0273848	0.186816	0.158354	0.0702046	0.0900178	0.284405	-0.163219	0.371964	-0.153188	0.070748	0.0607174	-0.327762	0.205743	-0.172706	0.0799399	0.0509348	-0.240204	0.0317122	0.303628	0.25481	0.0124896	0.313115	0.24537	0.681829	-0.269457	-0.278649	-0.0265462	0.070748	0.119271
		288	-0.616025	-0.269139	-0.366481	-0.588594	-0.254977	0.0919096	-0.317957	0.30046	0.0430912	0.167864	-0.276069	0.50782	0.0430912	-0.103069	0.112411	0.0361617	-0.297161	-0.373115	0.272438	0.161229	0.0705222	0.0425006	-0.0268192	0.167568	-0.367071	0.313137	-0.270025	0.0699316	0.0910237	-0.297456	-0.0271145	-0.318548	0.0211133	0.0211133	-0.270025	-0.0271145	0.333934	0.285116	0.160934	0.167273	0.0705222	0.361956	-0.415299	-0.248342	0.063888	0.18807	0.354731
		289	-0.358706	-0.670039	-0.648049	-0.481388	-0.192045	-0.428321	-0.52447	-0.175496	-0.432864	-0.50248	-0.363249	-0.35691	-0.432864	-0.190249	-0.169157	0.0240372	-0.159173	-0.460295	0.185257	-0.314726	-0.330377	0.0303761	-0.308387	-0.308387	-0.109752	-0.162818	-0.0877621	-0.0172491	0.00384301	-0.115193	-0.114295	-0.211341	0.12832	0.203376	-0.162818	-0.039239	0.0523661	0.423104	-0.045578	0.336042	-0.180265	-0.083219	-0.277311	-0.529911	0.00748822	0.326058	0.492719
		290	-0.0410274	0.796961	0.530351	0.0738292	0.0771108	-0.350719	-0.543913	0.23669	0.265383	-0.427416	0.766628	-0.427416	-0.309278	-0.309278	0.191967	0.193608	0.298998	0.191967	0.163275	-0.382693	-0.543913	-0.234222	-0.618969	-0.235862	0.297357	-0.427416	-0.160806	-0.618969	-0.309278	-0.0426682	-0.427416	-0.235862	-0.618969	-0.543913	-0.618969	-0.543913	-0.500831	-0.275663	-0.116084	-0.168633	-0.393801	-0.393801	-0.393801	-0.309278	-0.157525	-0.275663	-0.157525
		291	-0.191104	0.883161	0.616551	0.0418909	-0.191104	-0.382657	-0.457713	-0.149663	0.233444	-0.341216	0.616551	0.341477	-0.341216	-0.341216	0.0418909	0.608086	0.267059	0.0418909	-0.341216	-0.53277	-0.457713	-0.26616	-0.53277	-0.149663	1.06625	-0.341216	-0.0746064	0.149923	-0.341216	-0.0746064	-0.341216	-0.149663	-0.53277	0.224979	-0.53277	0.224979	-0.53277	-0.307601	-0.26616	-0.0824327	-0.307601	0.375092	-0.307601	-0.341216	-0.307601	0.375092	-0.307601
		292	-0.306729	0.903921	0.58971	0.260365	-0.184071	-0.314295	-0.498282	0.00748266	0.451919	-0.122742	0.835026	0.437293	-0.184071	-0.122742	0.260365	0.812833	0.0763782	0.260365	-0.0614129	-0.375624	-0.191637	0.122574	0.0536785	0.00748266	1.01195	-0.122742	0.252799	0.491055	-0.2454	0.130141	0.0612451	0.00748266	-0.436953	0.24574	-0.252966	0.552384	-0.191637	-0.314295	-0.2454	-0.436953	-0.375624	0.184411	-0.559611	-0.368058	-0.436953	0.184411	-0.436953
		293	-0.0648253	-0.420552	-0.543209	0.119162	0.0578327	-0.297894	-0.481881	-0.359223	-0.297894	0.119162	0.119162	0.262141	-0.359223	-0.297894	0.119162	0.446128	-0.481881	-0.297894	-0.236565	-0.359223	-0.175236	-0.0525777	0.0700803	-0.359223	0.262141	-0.297894	-0.113907	0.507457	-0.420552	-0.236565	-0.113907	0.0578327	-0.420552	0.262141	-0.236565	0.568786	-0.175236	-0.297894	-0.420552	-0.420552	-0.359223	0.200812	-0.543209	-0.543209	-0.00349632	0.200812	-0.420552
		294	-0.0332705	-0.345697	-0.771454	0.0208169	0.0027878	-0.396238	-0.536925	-0.327668	-0.309639	0.0208169	0.107417	-0.648796	-0.370968	-0.179739	-0.0224829	-0.334909	-0.580225	-0.266339	-0.24831	-0.414267	-0.100381	-0.150922	0.361434	-0.284368	-0.388997	-0.00653968	-0.168952	-0.186981	-0.475596	-0.378209	-0.168952	0.349187	-0.302397	-0.259097	-0.11841	0.0908476	-0.100381	0.0367602	-0.0858978	-0.259097	-0.284368	-0.580225	-0.381755	-0.554955	-0.0152413	-0.493626	-0.518896
		295	0.220663	-0.33997	-0.794618	0.025814	0.0907638	-0.599769	-0.534819	-0.40492	-0.469869	0.025814	0.155714	-0.794618	-0.469869	-0.27502	-0.0391358	-0.599769	-0.599769	-0.40492	-0.469869	-0.534819	-0.33997	-0.599769	-0.0152209	-0.33997	-0.40492	-0.0152209	-0.534819	-0.469869	-0.534819	-0.664719	-0.534819	0.610362	-0.27502	-0.21007	-0.27502	-0.14512	-0.33997	0.0497289	0.0497289	-0.21007	-0.33997	-0.599769	-0.21007	-0.469869	0.155714	-0.469869	-0.599769
	Z-scored event-related firing rate in the pVLS at the ealry stage
			Time bin
			1	2	3	4	5	6	7	8	9	10	11	12	13	14	15	16	17	18	19	20	21	22	23	24	25	26	27	28	29	30	31	32	33	34	35	36	37	38	39	40	41	42	43	44	45	46	47
	# of neurons	1	3.55613	1.08861	-0.145148	-0.145148	-0.145148	-0.145148	-0.145148	-0.145148	-0.145148	1.08861	1.08861	-0.145148	-0.145148	-0.145148	-0.145148	-0.145148	-0.145148	-0.145148	1.08861	1.08861	1.08861	-0.145148	-0.145148	-0.145148	-0.145148	-0.145148	-0.145148	-0.145148	-0.145148	-0.145148	-0.145148	1.08861	-0.145148	1.08861	1.08861	-0.145148	-0.145148	-0.145148	-0.145148	-0.145148	-0.145148	-0.145148	-0.145148	-0.145148	-0.145148	-0.145148	-0.145148
		2	2.37075	0.725741	-0.0967655	-0.0967655	-0.0967655	-0.0967655	-0.0967655	-0.0967655	-0.0967655	0.725741	0.725741	-0.0967655	-0.0967655	-0.0967655	-0.0967655	-0.0967655	-0.0967655	-0.0967655	0.725741	0.725741	0.725741	-0.0967655	-0.0967655	-0.0967655	-0.0967655	-0.0967655	-0.0967655	-0.0967655	-0.0967655	-0.0967655	-0.0967655	0.725741	-0.0967655	0.725741	0.725741	-0.0967655	-0.0967655	-0.0967655	-0.0967655	-0.0967655	-0.0967655	-0.0967655	-0.0967655	-0.0967655	-0.0967655	-0.0967655	-0.0967655
		3	0	0	0	0	0	0	0	0	0	0	0	0	0	0	0	0	0	0	0	0	0	0	0	0	0	0	0	0	0	0	0	0	0	0	0	0	0	0	0	0	0	0	0	0	0	0	0
		4	-0.0670126	-0.0670126	-0.0670126	1.64181	-0.0670126	-0.0670126	-0.0670126	-0.0670126	-0.0670126	-0.0670126	-0.0670126	-0.0670126	-0.0670126	-0.0670126	-0.0670126	-0.0670126	-0.0670126	-0.0670126	-0.0670126	-0.0670126	-0.0670126	-0.0670126	-0.0670126	-0.0670126	-0.0670126	-0.0670126	-0.0670126	-0.0670126	-0.0670126	-0.0670126	-0.0670126	-0.0670126	-0.0670126	-0.0670126	-0.0670126	-0.0670126	-0.0670126	-0.0670126	-0.0670126	-0.0670126	-0.0670126	-0.0670126	-0.0670126	-0.0670126	-0.0670126	-0.0670126	-0.0670126
		5	0.112824	0.112824	-0.357518	1.63351	0.865373	-0.26345	-0.169381	-0.451587	-0.169381	0.300962	0.206893	-0.26345	-0.357518	0.489099	-0.26345	-0.26345	-0.169381	-0.26345	0.39503	-0.0753127	0.39503	0.112824	0.112824	-0.357518	0.39503	0.0187558	0.677236	0.0187558	0.39503	0.206893	0.0187558	-0.451587	0.489099	-0.357518	0.206893	-0.357518	-0.0753127	-0.545656	-0.639724	-0.26345	-0.0753127	-0.0753127	0.112824	-0.169381	0.112824	-0.0753127	-0.0753127
		6	0.790115	0.376441	0.733447	2.3108	2.37001	-0.413508	-0.31944	-0.601645	0.0942349	0.564578	0.470509	-0.413508	-0.0939023	0.33904	-0.413508	0.413841	0.0942349	-0.413508	0.244972	1.42933	0.244972	0.790115	0.376441	0.319772	0.658646	0.282372	0.527177	-0.131303	0.244972	0.0568345	-0.131303	-0.601645	0.33904	-0.507577	0.0568345	-0.507577	-0.225371	-0.282039	-0.376108	-0.413508	-0.225371	0.188303	-0.0372341	0.50791	-0.0372341	-0.225371	0.188303
		7	0.871996	0.458322	0.815328	0.810242	3.21019	0.173905	0.394357	-0.646147	0.555265	0.393693	0.93154	-0.45801	0.367128	0.168155	0.173905	0.242956	0.049733	-0.710776	0.0740866	1.38483	0.20047	0.492847	0.205556	0.27527	1.37244	0.23787	0.482675	0.0769616	0.326853	0.517865	0.0769616	-0.266998	0.673688	-0.0465464	0.897014	0.0798367	0.109276	-0.0737751	0.0849225	0.0475221	0.235659	0.522951	0.17103	0.842557	0.55018	0.614809	1.02848
		8	0.645251	0.231576	1.05893	0.771634	2.2309	2.71578	0.449817	-0.308482	0.610725	-0.0211902	0.610725	-0.308482	3.00307	-0.434865	0.323434	0.392484	0.105193	-0.561248	-0.434865	1.34622	-0.308482	0.266101	-0.0211902	0.518868	0.863491	0.105193	-0.308482	-0.0557156	-0.182099	0.197051	-0.0557156	0.0706675	0.0706675	0.197051	0.5762	0.323434	0.0706675	0.357959	0.610725	0.197051	0.197051	0.484342	-0.0557156	0.898017	0.323434	0.5762	0.989875
		9	0.110943	-0.220518	-0.137653	0.237326	0.537781	3.75461	0.577128	-0.512631	0.655822	-0.639014	0.324362	-0.0983055	2.55098	-0.639014	0.20215	-0.721879	0.233155	0.394714	-0.473284	-0.181171	-0.0983055	-0.185341	0.272502	0.48175	0.659993	0.0674247	0.647481	0.237326	-0.386248	-0.00709864	0.568786	0.446574	0.529439	0.490092	0.869241	0.616475	0.115114	0.0715956	0.490092	0.490092	0.655822	0.529439	0.237326	0.115114	0.119284	0.869241	0.454916
		10	0.391392	-0.0353927	0.428769	0.963336	0.441228	4.29212	0.606958	0.56147	1.03374	-0.105799	0.320986	0.213203	2.07098	0.0848492	0.0723903	-0.474636	0.639987	0.863665	-0.416689	0.130338	0.117879	0.283609	0.519745	0.697934	0.594499	0.474257	1.24496	0.391392	-0.201123	-0.391771	0.43688	-0.00236337	0.27115	0.10542	0.200744	0.10542	-0.0478516	0.702282	0.391392	0.296068	0.74777	0.557122	0.10542	0.238121	-0.0104748	0.0100956	-0.499554
		11	0.740629	0.313845	1.34907	1.31257	1.36153	3.10561	1.52726	0.625174	1.09745	-0.042094	0.38469	-0.0086253	-0.25766	0.434087	-0.149438	-0.410931	0.989225	0.927369	-0.638517	-0.0914904	0.467116	0.347314	0.58345	0.476106	0.658204	0.252429	1.87973	0.740629	0.71918	-0.0425334	0.786118	-0.224191	0.334855	0.454657	0.835514	0.454657	0.301386	1.05152	0.169564	0.359773	1.38254	0.620827	0.169124	0.872891	0.338763	0.644866	-0.435849
		12	0.851958	0.483584	1.43595	0.877802	1.80432	2.47115	2.89652	1.23369	0.769995	0.566425	0.115649	0.458619	0.73123	1.04261	0.649267	0.00740278	1.12501	0.102727	-0.741829	-0.0874819	0.66131	0.375777	-0.265648	-0.182806	0.579347	0.280893	1.32814	0.305857	0.781599	0.565986	0.0198851	-0.741829	0.280453	0.292936	0.946843	0.292936	0.38826	1.05553	-0.265208	0.198051	1.60119	0.293375	-0.265648	0.686714	1.49338	0.483144	0.0898051
		13	0.841326	0.568275	1.13934	0.487529	1.41239	1.89023	2.6969	1.90192	0.859654	0.748097	0.201996	0.158703	0.717286	1.22593	0.158703	0.0904386	0.537464	-0.101865	0.108767	-0.195094	0.649022	0.363489	-0.56722	-0.195094	0.475046	-0.114348	0.934555	-0.089383	0.481683	0.841326	-0.089383	-0.0835368	0.363489	-0.00863649	0.742251	0.375971	0.760579	-0.00863649	-0.468145	0.475046	1.20761	-0.101865	-0.374916	0.388454	1.96434	0.661504	0.171185
		14	0.661512	0.0978442	0.969697	0.88895	0.661512	1.14443	2.52725	1.71702	0.965373	1.43505	0.307715	2.29366	1.11362	1.33674	0.259337	0.196158	0.648268	-0.286764	0.500019	-0.0944598	1.34106	0.759826	-0.170883	0.486775	0.580766	-0.0137132	0.759826	-0.269197	-0.559814	0.370895	-0.559814	0.307715	0.178591	-0.479068	0.276904	-0.0944598	0.290148	-0.18845	0.504342	0.290148	0.451641	0.585089	-0.559814	0.213725	1.78452	-0.0944598	-0.0137132
		15	0.30072	0.0101023	0.881955	1.07426	0.30072	0.783641	1.07426	1.95962	0.877632	1.07426	0.493024	3.46999	2.0169	1.57934	-0.374506	0.108416	0.0144256	-0.374506	1.28872	0.421189	0.980268	0.399033	0.0144256	0.399033	0.493024	-0.374506	1.60581	-0.083888	-0.374506	0.0101023	0.832275	0.493024	-0.182202	-0.566809	-0.083888	-0.182202	0.202406	-0.276192	1.29304	0.202406	0.421189	0.497347	-0.374506	1.00242	0.877632	-0.182202	-0.374506
		16	0.0242765	-0.266341	0.325287	0.885736	0.0242765	0.0346699	0.605512	0.0568251	-0.255948	0.605512	0.304501	3.57815	3.24596	0.63806	0.013883	-0.255948	0.595118	-0.546565	0.347443	0.0568251	0.896129	0.314894	0.314894	0.875342	0.304501	0.574331	1.24145	0.0242765	0.294107	-0.546565	1.22066	-0.255948	-0.266341	-0.266341	-0.255948	0.854555	-0.546565	0.304501	1.48913	0.013883	0.617273	1.16596	0.294107	0.918284	0.304501	-0.266341	-0.266341
		17	-0.173546	-0.173546	-0.45377	0.106678	-0.173546	-0.45377	-0.173546	0.14962	-0.45377	-0.173546	0.106678	1.63662	4.29379	0.14962	0.106678	-0.45377	0.106678	-0.45377	1.68589	0.14962	-0.173546	-0.173546	-0.173546	1.92318	0.106678	0.667126	2.28928	1.36273	0.386902	-0.45377	1.31346	-0.45377	-0.173546	-0.173546	-0.45377	0.94735	-0.45377	0.106678	0.710068	0.106678	0.710068	0.386902	0.386902	0.429844	0.106678	-0.173546	-0.173546
		18	0.301337	-0.276772	-0.556996	0.00345245	-0.276772	-0.556996	-0.276772	-0.556996	-0.556996	-0.276772	0.00345245	0.301337	2.95851	0.0211126	0.00345245	0.0211126	0.00345245	0.0211126	2.13549	-0.556996	-0.276772	0.301337	-0.276772	1.81995	0.00345245	0.563901	2.13549	1.2595	0.283677	-0.556996	0.00345245	-0.556996	0.879445	0.301337	0.0211126	0.844125	-0.556996	0.581561	0.00345245	0.00345245	0.00345245	0.283677	0.861785	-0.276772	0.00345245	0.301337	0.301337
		19	0.467176	-0.528727	0.202413	0.0979642	-0.31983	0.306861	-0.00648424	0.515758	-0.00648424	0.306861	0.202413	0.676073	2.21235	1.19831	-0.00648424	0.362727	0.202413	0.88497	2.79045	0.724655	-0.215381	0.362727	0.41131	1.112	-0.215381	-0.31983	2.79045	1.42534	0.0979642	-0.528727	-0.110933	-0.110933	0.731939	0.258279	0.467176	-0.528727	-0.215381	0.676073	0.0979642	-0.215381	-0.31983	0.202413	0.571624	0.202413	-0.424278	0.676073	0.0493817
		20	0.659372	-0.33653	0.0965422	0.290161	-0.4257	0.200991	0.185712	0.409888	0.185712	0.200991	0.0965422	1.16634	0.570202	1.09244	-0.112355	0.554924	0.0965422	1.37523	1.14831	0.916852	1.16908	0.554924	1.19964	-0.530149	0.57295	0.170434	2.04251	0.379331	-0.00790632	-0.634597	0.975465	0.0812639	1.2222	0.450475	1.25551	-0.634597	1.16908	0.570202	0.588228	-0.0231846	-0.4257	1.28881	0.763821	0.394609	0.0659857	0.570202	-0.0564888
		21	0.206365	-0.211429	0.221643	0.415262	-0.300599	0.326091	0.310813	0.534988	0.310813	0.326091	0.221643	0.713329	0.117194	0.639437	0.0127459	0.101916	0.221643	1.88108	0.117194	1.04195	3.2119	0.101916	1.32474	-0.405048	0.698051	0.295535	1.0114	0.504432	0.117194	-0.509496	1.10057	0.206365	0.191086	-0.00253229	2.72022	-0.509496	2.25304	1.07605	1.67219	0.101916	-0.300599	1.41391	0.310813	0.51971	0.191086	0.117194	-0.509496
		22	-0.0146249	-0.0146249	-0.312692	-0.0146249	-0.312692	-0.312692	-0.0146249	-0.312692	-0.0146249	-0.312692	-0.312692	0.283442	-0.312692	-0.312692	-0.312692	-0.0146249	-0.312692	1.2423	-0.312692	-0.0146249	5.48771	-0.0146249	0.581509	-0.312692	0.581509	0.283442	0.581509	0.283442	-0.312692	-0.312692	0.879577	-0.0146249	0.283442	-0.0146249	2.49923	2.07966	2.1365	0.646167	1.2423	-0.0146249	-0.312692	0.879577	-0.0146249	-0.0146249	0.283442	-0.312692	-0.312692
		23	-0.189255	-0.189255	-0.189255	-0.189255	-0.189255	-0.189255	-0.189255	-0.189255	-0.189255	-0.189255	-0.189255	-0.189255	-0.189255	-0.189255	-0.189255	-0.189255	-0.189255	0.769604	-0.189255	-0.189255	6.084	-0.189255	1.77393	-0.189255	-0.189255	-0.189255	-0.189255	-0.189255	-0.189255	-0.189255	-0.189255	-0.189255	-0.189255	-0.189255	1.72846	2.20309	0.769604	0.769604	0.769604	-0.189255	-0.189255	-0.189255	-0.189255	-0.189255	-0.189255	-0.189255	-0.189255
		24	0.370531	-0.242993	-0.242993	-0.242993	-0.242993	-0.242993	-0.242993	-0.242993	-0.242993	-0.242993	-0.242993	0.370531	-0.242993	-0.242993	-0.242993	-0.242993	-0.242993	-0.242993	-0.242993	0.370531	5.33959	-0.242993	2.33372	-0.242993	0.370531	-0.242993	-0.242993	0.370531	-0.242993	-0.242993	-0.242993	-0.242993	-0.242993	-0.242993	-0.242993	2.14936	-0.242993	-0.242993	-0.242993	-0.242993	-0.242993	-0.242993	-0.242993	-0.242993	-0.242993	-0.242993	-0.242993
		25	0.384434	-0.229089	-0.229089	-0.229089	-0.229089	-0.229089	-0.229089	-0.229089	-0.229089	-0.229089	-0.229089	0.384434	-0.229089	-0.229089	-0.229089	-0.229089	-0.229089	-0.229089	-0.229089	0.384434	6.32765	-0.229089	2.34762	-0.229089	0.384434	-0.229089	-0.229089	0.384434	-0.229089	-0.229089	-0.229089	-0.229089	-0.229089	-0.229089	-0.229089	-0.229089	-0.229089	-0.229089	-0.229089	-0.229089	-0.229089	-0.229089	-0.229089	-0.229089	-0.229089	-0.229089	-0.229089
		26	1.00332	0.389793	0.389793	-0.00223736	-0.00223736	-0.394268	-0.00223736	-0.394268	0.389793	-0.00223736	-0.00223736	0.219256	-0.394268	-0.394268	-0.394268	-0.394268	-0.394268	-0.394268	-0.00223736	0.219256	4.98334	0.781823	0.219256	-0.394268	0.219256	-0.394268	0.389793	0.219256	0.389793	-0.394268	0.389793	-0.394268	-0.00223736	-0.394268	-0.00223736	-0.00223736	-0.00223736	-0.00223736	-0.00223736	0.389793	0.389793	-0.00223736	0.781823	-0.394268	-0.00223736	-0.394268	-0.394268
		27	0.389994	0.893228	0.389994	0.501198	-0.00203656	-0.394067	-0.00203656	-0.394067	0.389994	-0.00203656	-0.00203656	-0.394067	-0.394067	-0.394067	0.109167	-0.394067	-0.394067	-0.394067	0.501198	0.109167	3.7565	3.2982	0.109167	-0.394067	0.109167	-0.394067	1.39646	0.109167	0.389994	-0.394067	0.893228	0.109167	-0.00203656	0.109167	-0.00203656	-0.00203656	-0.00203656	-0.00203656	-0.00203656	0.389994	0.389994	-0.00203656	0.782024	-0.394067	-0.00203656	-0.394067	-0.394067
		28	0.275395	0.77863	0.275395	0.386599	-0.116635	-0.508665	-0.116635	-0.508665	0.761058	0.369027	0.369027	-0.508665	-0.0230029	0.462659	-0.00543085	-0.0230029	-0.0230029	-0.508665	0.872262	-0.00543085	0.761058	3.66926	1.93722	0.948322	-0.00543085	-0.508665	2.25319	0.480231	0.761058	-0.0230029	0.77863	-0.00543085	0.85469	0.480231	0.369027	0.369027	0.369027	-0.116635	-0.116635	0.275395	0.275395	-0.116635	0.667426	-0.508665	0.85469	-0.508665	-0.508665
		29	-0.367396	0.135838	-0.367396	0.135838	-0.367396	-0.367396	-0.367396	-0.367396	0.118266	0.118266	0.118266	-0.367396	0.118266	0.603928	1.41712	0.758908	0.118266	-0.367396	0.6215	0.135838	0.118266	2.63444	4.64105	2.37087	0.135838	-0.367396	1.6104	0.6215	0.118266	0.118266	0.135838	0.135838	1.24457	1.26214	0.758908	0.118266	0.118266	0.273245	-0.367396	-0.367396	-0.367396	-0.367396	-0.367396	-0.367396	0.603928	-0.367396	-0.367396
		30	-0.0959685	-0.290184	-0.160707	-0.290184	-0.290184	-0.290184	-0.354923	-0.160707	0.260217	0.195478	0.260217	-0.290184	0.195478	0.616402	0.926361	0.965597	0.195478	-0.290184	0.0660012	-0.225446	0.260217	0.195478	4.34451	2.57756	-0.354923	-0.354923	2.10539	1.42551	1.49025	1.36077	0.227724	0.227724	2.3576	1.22455	1.35403	0.713386	0.583909	0.803627	0.0982471	-0.0959685	0.227724	0.227724	0.292463	-0.03123	1.13431	-0.290184	-0.354923
		31	0.175536	-0.383236	0.353836	-0.140198	-0.0186792	-0.140198	-0.0834177	-0.375278	-0.196978	-0.383236	0.289097	0.345878	-0.0186792	-0.447974	1.4409	0.75144	0.588915	0.10284	-0.512713	0.289097	0.0460594	-0.383236	2.67337	1.39208	-0.326455	-0.326455	3.34987	0.968315	0.911535	1.51117	0.742267	0.37771	1.29322	1.13191	1.26139	0.742267	0.00519524	0.710576	0.126714	0.418574	0.256191	0.37771	0.685486	-0.124282	-0.0515851	-0.0186792	-0.204937
		32	0.0601953	0.305148	0.640357	0.146324	0.267842	-0.255539	0.203104	-0.490619	-0.31232	0.305148	0.173756	1.03426	-0.13402	-0.161453	0.044279	-0.00454321	0.473574	-0.0125013	-0.628054	0.173756	0.332581	-0.498577	-0.00454321	0.397319	0.361929	-0.0399339	3.23453	2.86229	1.59992	1.39583	0.626926	1.06609	0.939102	0.777792	0.907269	0.626926	0.693579	0.356455	0.0113731	0.303233	0.542713	1.46796	0.972008	0.564102	0.234936	-0.13402	-0.320278
		33	-0.20112	0.238049	0.44378	0.0792237	0.200743	-0.322639	0.200743	-0.352348	-0.444158	0.238049	0.0419178	0.967162	-0.20112	-0.163814	0.376766	-0.20112	0.406474	0.255247	-0.565677	0.0419178	0.200743	-0.230829	-0.20112	0.535591	1.36411	0.627401	3.08258	3.57424	0.907745	1.83768	0.0419178	0.481086	-0.163814	0.322262	0.65711	0.376766	0.238049	0.171034	-0.444158	0.376766	-0.0422952	0.882949	0.322262	0.572897	-0.285333	-0.20112	-0.322639
		34	-0.567192	0.463151	-0.165329	0.0612888	0.0612888	-0.113956	0.0612888	-0.232344	-0.567192	0.463151	-0.567192	0.463151	-0.567192	-0.165329	-0.00572573	-0.567192	-0.567192	-0.232344	-0.567192	-0.567192	0.514525	0.220892	-0.113956	0.396137	1.69431	1.63746	1.90529	3.90445	2.49256	2.01352	0.33928	1.59624	0.514525	0.514525	0.849373	0.44751	0.463151	0.849373	-0.340574	-0.232344	0.287907	0.638396	0.514525	0.798	0.0612888	-0.340574	-0.340574
		35	-0.353083	0.358512	-0.256088	0.164521	0.0675253	0.294143	0.261516	-0.0182353	-0.256088	-0.0294701	-0.159093	0.261516	0.0348983	-0.256088	0.305378	-0.0620971	-0.547074	0.951719	-0.159093	-0.159093	1.00574	1.01697	0.294143	0.208383	1.20169	1.74069	2.1194	2.78821	3.16388	2.9066	0.747379	1.20061	0.423766	0.423766	0.952605	0.758614	-0.0294701	0.855609	-0.126466	-0.115231	0.100152	-0.256088	0.811747	0.305378	0.164521	0.455507	0.552503
		36	-0.685639	0.583028	-0.0315715	0.203347	-0.0793395	0.147278	0.300342	0.242814	-0.402953	-0.176335	-0.120267	0.300342	-0.297657	-0.0315715	0.380737	-0.208962	0.0488235	0.655697	0.0654239	0.251115	1.04456	0.906642	0.51866	0.098051	0.050283	1.66689	1.00452	1.37502	2.7187	1.08549	2.08604	1.42513	1.20535	0.833973	1.02796	0.648282	-0.176335	0.745278	-0.0876397	-0.782634	-0.0467125	-0.588644	1.22195	0.380737	0.574728	0.308642	0.591328
		37	-0.218229	0.382003	0.435839	0.00232181	-0.280364	-0.280364	0.541134	0.268408	0.0644574	-0.37736	-0.0946736	0.0993173	-0.272064	-0.0059784	0.179712	0.700265	0.516234	0.68129	0.091017	1.16034	0.390304	0.478999	0.532834	-0.102974	0.0644574	1.00121	0.338843	0.947376	1.59978	0.64643	2.53061	0.974651	0.992911	0.179712	0.373703	-0.0059784	-0.37736	0.974651	0.153153	-0.315224	-0.0325381	-0.56305	0.567694	0.179712	0.373703	0.549435	0.390304
		38	-0.127188	-0.690828	1.10878	-0.0279007	-0.722762	-0.722762	0.413916	0.359448	0.0585022	-0.213591	-0.367348	0.141823	-0.229559	0.15779	0.513204	1.00949	0.461818	-0.367348	0.15779	0.887668	-0.367348	-0.0119336	0.429884	-0.0119336	0.0585022	1.14071	0.429884	0.868618	0.599607	0.90712	2.76711	1.89004	0.986956	-0.16569	0.00403362	0.15779	-0.892485	0.532254	0.244193	-0.296912	-0.280945	-0.399282	0.00403362	-0.16569	0.173757	0.0585022	-0.367348
		39	0.334417	-0.994351	1.01331	0.27038	-0.550875	-0.134762	0.400112	0.204685	0.334417	0.374409	-0.277123	0.128019	0.544132	0.582466	0.856218	1.59749	-0.213087	-0.0690666	-0.145733	0.502482	-0.277123	-0.211428	0.542474	-0.211428	0.958588	0.673864	0.958588	1.12997	0.816226	1.39109	2.18167	2.00263	0.958588	0.697466	-0.277123	0.166352	-0.304485	1.47707	0.854559	0.580807	0.515112	0.166352	0.13899	-0.23879	0.204685	0.646502	-0.0690666
		40	-0.00809499	-0.895046	0.670799	0.369685	-0.45157	-0.0354567	0.0576001	0.30399	-0.00809499	0.473714	-0.177818	0.227324	0.643437	0.681771	0.955523	0.813161	-0.555599	0.0302384	0.305388	0.0699691	1.22945	1.29514	1.25541	0.943325	0.616076	0.683168	1.31971	1.22927	0.82553	1.04858	0.955523	1.2183	1.31971	1.14859	1.58126	1.32111	-0.20518	1.04456	0.512047	0.238295	0.1726	0.265657	0.238295	-0.139485	0.30399	0.30399	0.0302384
		41	0.015885	0.0670202	-0.243307	0.785525	0.0414526	0.543964	-0.304137	0.500765	0.318276	0.32797	0.361474	0.0846513	0.241573	0.492829	0.640056	0.846354	0.153418	0.137545	0.462035	0.479666	1.46635	1.31912	1.32259	1.39929	1.02884	0.583694	1.43009	0.830481	0.938978	0.61273	1.07204	0.439935	1.77567	1.68481	2.16375	1.30496	0.759957	1.53758	0.881617	1.03678	0.622425	0.422304	0.561595	0.569531	0.32797	0.111977	0.00794851
		42	-0.463461	0.161194	0.191003	0.646316	0.579791	0.117995	-0.313992	0.257528	0.204392	0.450195	0.613054	0.257528	0.363798	0.406997	0.084733	0.603117	0.0648599	-0.184396	0.373477	0.835274	1.35246	1.30927	1.36611	1.38944	0.108059	0.469811	1.42296	-0.0116009	0.878472	0.656252	0.51672	0.483458	1.76855	0.609344	2.41533	1.81797	1.06491	0.566145	0.430322	0.689514	0.353862	0.204392	0.0315978	1.16125	-0.28073	0.234202	-0.496723
		43	-0.247017	0.319835	0.234038	0.747154	0.680629	0.854666	0.133664	0.64738	0.478639	0.955654	0.771694	0.416168	0.638045	0.681244	0.127768	1.28198	0.801531	0.205457	0.122499	0.584295	-0.0117648	0.176249	0.758319	1.01286	0.440108	0.392242	1.6294	0.72507	0.800903	1.39292	1.02218	0.757704	1.45477	0.64738	0.930499	1.44139	1.62818	0.777591	1.05139	1.25278	0.512502	0.767654	0.479253	1.89792	0.744956	0.33504	-0.222476
		44	0.00508438	0.482408	0.406004	0.437672	0.294143	0.551446	0.0927676	0.38736	-0.250305	0.529101	0.169215	-0.18318	0.467552	0.637216	0.549533	0.506711	0.199051	0.374292	-0.606445	0.111412	-0.311853	-0.250305	0.288566	0.154316	-0.20557	0.0890224	1.45578	0.551446	0.284821	1.08657	0.672629	0.624149	0.935553	0.726687	0.115157	0.885241	1.10896	0.730432	1.12756	1.06976	0.508543	0.887028	-0.0768962	1.4651	0.997057	1.31213	0.415282
		45	1.19666	0.537304	-0.344364	0.309837	-0.199154	1.37756	-0.109407	0.259525	0.575804	0.292874	-0.141351	-0.311015	0.745468	0.143919	0.421698	0.635947	0.179608	0.172118	-0.625889	-0.456225	-0.256957	-0.45248	-0.279071	-0.0478588	0.289129	0.143919	0.522681	0.349272	-0.282816	1.29015	0.801865	0.313583	0.259525	1.37007	-0.195409	0.209212	0.432934	0.859668	0.999728	1.199	0.455048	0.684854	-0.0219997	0.863414	1.23469	0.561758	1.16705
		46	0.96386	0.392201	-0.46353	0.342095	-0.196785	0.654422	-0.603304	-0.206459	0.404764	-0.109378	-0.286454	-0.366449	0.484759	-0.0570113	0.42209	-0.0592729	-0.543525	-0.144419	-0.743079	-0.603304	0.0124418	-0.533851	-0.563741	-0.65341	0.0602855	-0.0570113	-0.284193	-0.373861	-0.483746	0.567015	0.339834	0.0528732	-0.0570113	1.11331	-0.426228	-0.396339	-0.0271217	0.698509	0.601428	0.76883	0.549061	0.374247	-0.27678	0.259839	0.342095	1.87927	2.34104
		47	0.534726	-0.310675	-0.553337	-0.139078	-0.0648901	0.564615	-0.523448	-0.296266	0.550207	-0.0680121	-0.362713	-0.116929	0.356461	-0.302934	-0.176708	0.0726224	-0.41163	-0.507966	-0.545597	-0.419371	-0.0117786	-0.336369	-0.366259	-0.403889	0.0360651	-0.250895	-0.530115	-0.515707	-0.351851	0.151429	-0.0237141	-0.362713	-0.198857	0.476019	-0.332824	-0.0427412	-0.221006	0.334961	-0.153486	0.0139161	0.28959	-0.224552	-0.0792985	0.0139161	-0.243155	1.61764	2.67894
		48	0.316427	0.0777944	-0.236687	0.742726	-0.00531094	0.181872	0.615427	0.0922027	0.167463	-0.265504	0.190201	0.107095	0.138162	0.414425	0.0473162	0.204021	0.398355	-0.0268714	-0.0645016	0.0617245	0.0478006	-0.184164	0.443726	0.406096	0.331908	0.302019	0.608759	-0.034612	-0.199645	0.0257558	-0.550096	-0.632024	-0.303723	-0.235614	-0.602134	-0.147607	0.00301825	0.137469	0.234983	-0.0191307	0.0920985	-0.236791	0.144726	-0.348021	-0.348021	1.93429	2.05993
		49	0.522727	0.0538554	-0.170957	0.599229	0.0814304	-0.0424166	0.450918	-0.242766	-0.146494	0.221936	-0.0340875	-0.206862	0.514922	0.931754	0.594535	0.209971	0.374416	-0.11059	-0.2589	0.498263	-0.675733	-0.788139	0.270339	0.723076	0.41865	0.0179511	1.0962	0.542497	0.518033	0.202166	-0.804274	-0.255265	0.0132575	-0.178762	0.145434	-0.0309759	-0.11059	-0.275034	0.0018168	0.638769	0.0293919	0.1012	-0.058551	-0.691867	-0.291169	0.705893	0.801641
		50	0.550065	0.163695	-0.165195	0.829642	0.035154	-0.015078	0.52141	-0.32331	-0.0582311	0.522159	0.106214	-0.13637	0.793568	1.15836	0.64345	0.250001	0.284987	-0.0654799	-0.201099	0.529407	-0.436434	-0.687185	0.32814	0.707261	0.442183	0.0630608	1.25808	0.64345	0.579639	0.51508	-0.28448	0.187108	0.286824	0.380379	0.674113	0.453276	0.236592	0.158453	0.401037	0.8438	0.380379	0.344304	0.193439	-0.378954	0.151204	0.639297	0.561158
		51	0.0319301	-0.152453	-0.11491	0.207873	0.273153	-0.105969	-0.325615	-0.564372	-0.411921	0.534901	-0.449464	-0.363158	0.275432	0.550867	0.37912	0.00893878	-0.158063	-0.292268	-0.352802	0.265077	-0.386149	-0.434913	-0.0398246	0.151584	-0.0384098	-0.379989	0.411052	0.529291	0.644198	0.0863039	-0.168104	0.265941	0.351383	0.167864	0.790489	0.480292	-0.140367	-0.0165185	-0.102825	0.617012	0.24295	0.648394	-0.0333495	-0.464565	0.290849	0.727125	0.700803
		52	-0.193199	-0.177233	-0.13969	0.183093	0.0480235	0.0696	-0.150046	0.409634	-0.236352	-0.0909268	-0.273895	-0.187589	-0.150046	-0.0749606	-0.246708	-0.0158413	-0.182843	-0.317048	-0.177233	0.437685	-0.010231	-0.0589944	-0.0646047	0.324192	0.334548	-0.20442	0.383312	-0.0965371	-0.181978	-0.138825	0.00746481	-0.159537	0.523991	-0.0572648	-0.0356883	0.255163	-0.165147	-0.0412986	-0.127605	-0.209165	0.0178207	1.21874	-0.0581296	-0.288996	0.0657193	0.501996	0.475673
		53	-0.415402	-0.346181	-0.213604	-0.126789	-0.120925	-0.0575683	-0.288689	0.485382	-0.288689	-0.314503	-0.421267	-0.35791	-0.352046	-0.0868912	-0.490487	-0.0810266	0.0398214	-0.326232	-0.219468	0.265991	-0.245282	-0.144383	-0.138518	0.461924	0.441975	-0.308638	0.341076	-0.340316	-0.427131	-0.490487	-0.603116	-0.60898	0.139278	-0.539759	-0.634794	-0.369639	-0.603116	-0.470538	-0.43886	-0.421267	-0.369639	0.939163	-0.452945	-0.545624	-0.257011	0.425824	0.471586
		54	-0.547591	-0.444684	-0.420878	-0.484235	-0.444684	-0.274484	-0.242806	0.383023	0.0064961	-0.341776	-0.0529238	-0.0251821	-0.234933	0.0263651	-0.405133	-0.0765421	0.437994	-0.207191	-0.353586	0.422574	-0.238869	-0.282357	-0.171577	0.509736	0.272243	-0.587142	0.707491	-0.22706	-0.377391	-0.0489875	-0.262675	-0.33784	0.260247	-0.484235	-0.365582	0.216247	0.271543	-0.310098	-0.242806	-0.195382	0.00255973	1.51926	-0.0133729	0.046047	0.536778	0.359079	0.624314
		55	-0.572506	-0.469599	-0.486449	-0.50915	-0.510255	-0.340055	-0.308376	-0.239979	0.022236	-0.366692	-0.118495	-0.00944213	-0.259848	0.00144968	-0.470704	-0.0201468	0.372423	-0.150796	-0.29719	-0.159773	-0.223129	-0.347927	-0.196492	-0.113267	-0.350759	-0.530746	0.125143	-0.21132	-0.28034	-0.0332475	-0.28759	-0.240789	-0.362756	-0.50915	-0.309187	0.353953	0.327939	-0.253703	-0.227066	-0.138987	0.0182997	0.379486	-0.0382884	-0.0195238	0.593173	0.659407	0.883986
		56	-0.561615	-0.502513	-0.614398	-0.537361	-0.506787	-0.460579	-0.37569	-0.382776	-0.00869579	-0.310013	-0.212044	0.0155584	-0.215297	-0.180449	-0.423431	-0.194621	0.100193	-0.193855	-0.396181	-0.186002	-0.161748	-0.39841	-0.251678	-0.370649	-0.561615	-0.503025	0.195931	0.0299856	-0.223662	0.0989145	-0.167555	-0.116051	-0.335034	-0.513107	-0.133219	0.38836	0.447974	-0.24083	-0.270125	0.0342597	0.004198	0.292622	0.0332383	-0.0672858	0.457801	0.293386	0.517226
		57	-0.514515	-0.526642	-0.503458	-0.68178	-0.594756	-0.591552	-0.506662	-0.478134	-0.261291	-0.59689	-0.755612	-0.620075	-0.672857	-0.39004	-0.582629	-0.524502	-0.585833	-0.615801	-0.576215	-0.544108	-0.392174	-0.649673	-0.45388	-0.466007	-0.578355	-0.448536	-0.383252	-0.115766	-0.347245	-0.288749	-0.213852	-0.310864	-0.657526	-0.274488	-0.235967	-0.042308	-0.324061	-0.463867	-0.528777	-0.111492	-0.404302	-0.24489	-0.581559	-0.518789	-0.229558	0.609291	0.790127
		58	-0.455586	-0.798698	-0.569366	-0.87109	-0.32968	-0.65746	-0.57257	-0.584697	-0.325764	-0.620708	-0.656028	-0.85004	-0.944913	-0.165619	-0.648537	-0.877869	-0.734487	-0.969167	-0.515851	-0.443089	-0.622139	-0.798327	-0.725935	-0.738062	-0.767664	-0.63641	-0.199486	-0.180239	-0.824013	0.0605083	-0.23767	-0.539393	-1.01233	0.115425	-0.258349	-0.146001	-0.263697	-0.817233	-0.593249	0.114364	-0.717013	-0.10178	-0.853615	-0.501951	-0.417432	0.425723	0.72996
		59	-0.206383	-0.512379	-0.333025	-0.771085	-0.079742	-0.396864	-0.471831	-0.49682	-0.236417	-0.505637	-0.309074	-0.834925	-0.767737	0.197871	-0.610638	-0.740014	-0.632279	-0.817715	-0.315156	-0.365134	-0.568439	-0.521196	-0.587346	-0.437412	-0.618417	-0.610638	-0.143582	-0.111472	-0.833887	0.188441	-0.147588	-0.510682	-0.911589	0.366098	0.0323788	0.121207	0.0762741	-0.515113	0.00800304	0.369446	-0.251362	0.261711	-0.390169	-0.164185	0.0945218	0.248274	0.344881
		60	-0.257832	-0.563827	-0.222035	-0.631015	0.158927	-0.448313	-0.0707237	-0.321991	-0.415545	-0.139289	-0.232843	-0.631015	-0.563827	0.0825827	-0.598247	-0.663783	-0.556048	-0.387527	-0.175086	-0.225064	-0.556048	-0.381126	-0.412516	-0.488861	-0.379748	-0.598247	-0.0673509	-0.0643221	-0.595218	0.0731523	-0.390556	-0.498291	-0.771518	0.12313	-0.0829095	-0.0579205	0.0248255	-0.438883	0.53679	0.190318	-0.238971	0.0825827	-0.313938	-0.215633	0.0778322	-0.250053	-0.217285
		61	-0.187782	-0.131554	0.263423	-0.343966	0.0947243	-0.244011	0.445974	-0.0239697	-0.0753118	0.0447465	0.0246439	-0.250248	-0.0378351	0.518212	-0.0503094	-0.293989	-0.300239	0.325902	-0.219022	0.0433957	-0.0190833	-0.031598	0.0822366	0.0371317	0.282175	-0.456423	0.0246439	0.494588	0.263437	-0.281501	-0.112802	0.0184068	-0.350217	0.0808724	0.112098	0.355764	0.0746083	0.243307	0.595867	0.418243	0.0683443	0.299536	0.180815	0.280797	0.625769	-0.356468	-0.281487
		62	-0.45687	0.41453	0.523421	-0.152045	-0.0313201	-0.152045	0.780939	-0.168113	-0.437465	-0.367384	-0.1014	-0.562423	0.0041526	0.410267	-0.144474	-0.488109	0.320812	0.0818037	-0.488109	0.496415	-0.406225	-0.42563	0.199191	-0.331912	-0.0549889	-0.382556	0.234664	0.00749016	0.312315	-0.550588	-0.331912	-0.343746	0.15278	-0.238193	-0.499944	0.222829	-0.226359	0.16035	0.406064	-0.0507558	-0.550588	-0.312507	-0.195119	-0.113235	0.0818037	-0.71862	-0.257598
		63	-0.511384	0.360016	0.563988	-0.206559	0.00924743	-0.206559	0.273868	-0.448905	0.15074	-0.648176	0.486805	-0.616937	0.270998	0.355753	0.122371	-0.542623	0.266298	-0.198988	-0.542623	0.76326	-0.13938	-0.480144	0.239759	0.256294	-0.0144214	-0.115711	0.18015	-0.273302	0.352882	-0.605102	-0.386426	-0.0769005	0.0982656	0.350012	-0.233098	0.168315	-0.280873	0.427196	0.541713	0.537449	-0.283743	0.275699	0.393086	0.153611	0.76509	-0.451775	0.00924743
		64	0.425485	0.972362	0.273327	0.0772198	0.132786	0.272743	0.636297	-0.258844	0.411365	-0.426877	0.356384	-0.329115	0.105295	-0.0205415	0.844606	-0.356606	0.385793	0.132201	-0.552129	0.832405	-0.30104	-0.356606	0.105295	0.0905907	-0.398801	-0.160498	-0.243555	-0.622399	0.0350246	-0.747651	-0.747651	-0.30104	0.217761	0.0905907	-0.30104	-0.0205415	-0.286335	0.00753392	0.594687	0.286113	0.551322	0.509127	0.0631	-0.133008	0.41195	-0.105517	-0.0627368
		65	0.839238	0.488514	0.182984	0.269788	0.206186	0.350431	0.431074	0.154908	0.82083	0.154908	0.831864	-0.0345303	0.297864	0.344347	1.54556	0.401787	0.246585	0.373634	0.206264	0.746349	0.453065	-0.0577332	0.0681037	0.504343	0.355304	-0.0870977	-0.563659	-0.270374	0.165865	-0.448779	-0.793418	0.0509851	-0.385254	0.619223	-0.121335	-0.0577332	-0.0406146	0.142662	0.446903	0.699866	1.19483	1.14835	0.193941	0.453065	0.998023	0.016748	-0.333976
		66	0.911528	0.437053	0.0576651	0.218327	0.699623	0.29897	0.503364	0.598451	0.250401	0.103447	0.261435	-0.0859911	0.0487941	0.540388	1.66774	0.350326	0.318875	0.322173	0.154803	0.621031	0.203995	-0.109194	-0.180966	-0.0660858	0.106234	-0.459918	-0.367618	0.0494175	-0.330706	-0.252738	-0.721128	0.173168	-0.0654624	0.172545	-0.370404	0.138308	0.155426	0.141095	-0.247277	0.129437	0.945765	0.949175	-0.00523575	0.575248	0.229985	-0.356072	-0.583046
		67	-0.131744	0.373542	0.678483	-0.140615	0.438441	0.430982	0.439852	0.239509	-0.304064	-0.255495	0.0980157	-0.542695	-0.0168643	0.279207	1.21319	0.0891447	0.841932	-0.427815	0.0891447	0.164327	0.0405757	0.316102	0.439852	-0.131744	0.0405757	-0.427815	0.448723	-0.114002	-0.494126	-0.122873	-0.591264	0.00974868	-0.228882	0.106887	-0.533824	-0.122873	-0.00799329	0.173198	-0.312935	-0.131744	0.0980157	0.296949	0.124629	1.09831	0.164327	-0.715015	-0.648704
		68	-0.45141	0.0513312	0.238848	-0.635145	0.35108	0.111316	0.175082	-0.140142	-0.571379	-0.635145	-0.511395	-0.635145	-0.571379	-0.267674	0.60632	-0.635145	0.295052	-0.635145	-0.635145	-0.327659	-0.571379	0.111316	0.295052	-0.511395	-0.571379	-0.635145	0.418802	-0.0839385	-0.578942	-0.387644	-0.571379	0.0398124	-0.203908	-0.327659	-0.391425	-0.207689	-0.327659	-0.263893	-0.575161	-0.571379	-0.571379	-0.080157	-0.0201723	0.786274	-0.327659	-0.635145	-0.33144
		69	-0.691112	0.503679	0.159545	-0.182798	-0.0628281	0.279514	-0.0646205	-0.466947	-0.526932	-0.466947	-0.751097	-0.751097	-0.526932	-0.346978	0.279514	-0.466947	0.339499	-0.182798	-0.182798	-0.406963	-0.526932	-0.00463577	0.0553489	-0.466947	-0.811082	-0.182798	0.623649	-0.00284338	-0.00284338	0.101352	-0.526932	-0.286993	-0.406963	-0.406963	-0.631128	-0.571143	0.161337	0.101352	0.161337	0.0413675	-0.526932	-0.691112	-0.631128	0.743618	-0.406963	-0.751097	-0.286993
		70	-0.422002	0.141056	-0.339936	-0.13266	0.0694243	-0.384197	-0.481987	-0.0609787	-0.120963	-0.25258	-0.591473	-0.70096	-0.422051	-0.242097	-0.247339	-0.334695	-0.0231241	-0.187403	-0.0505451	-0.219967	-0.285193	-0.750461	-0.58099	-0.197837	-0.624086	0.168428	0.261026	-0.0621923	0.238896	0.479949	-0.39468	-0.318971	-0.384197	-0.302082	-0.553619	-0.356776	0.266218	0.288348	0.375704	0.228363	-0.367308	-0.422002	-0.362017	0.189394	-0.0557372	-0.673588	-0.154741
		71	-0.520677	0.102366	-0.318642	-0.0128176	-0.0892356	-0.324339	0.113454	-0.0996691	-0.0996691	-0.132738	-0.471631	-0.264052	0.0748414	-0.0836914	0.129585	0.102213	-0.0232512	-0.226094	0.22783	-0.160109	0.0531668	-0.849137	-0.73965	0.0805384	-0.444259	0.28827	0.102366	-0.122304	0.0202509	0.441259	-0.373385	-0.379082	-0.482872	-0.400757	-0.712278	-0.258355	0.326075	0.40819	0.435562	0.249657	-0.187481	-0.520677	-0.520677	0.22783	-0.154412	-0.553746	-0.373385
		72	-0.266556	0.17078	-0.34867	0.820781	-0.403414	-0.354367	0.367576	-0.129697	0.635487	0.219826	0.547675	-0.00993017	0.0448131	-0.11372	0.0995563	0.0721847	-0.0532795	-0.540272	-0.0863481	-0.190138	0.0231384	-0.595015	-0.485529	0.05051	-0.190138	-0.0259079	-0.211812	-0.436482	-0.293927	-0.157069	-0.403414	-0.409111	-0.5129	-0.430785	-0.458157	-0.00423323	-0.272253	-0.190138	-0.162766	-0.34867	-0.217509	-0.266556	-0.266556	-0.0863481	-0.184441	-0.299624	-0.403414
		73	-0.336381	-0.0157428	-0.212472	0.876997	-0.444801	-0.270779	0.42166	-0.336381	0.351361	0.0963242	0.494405	0.0617748	0.154706	0.0426394	0.216661	0.0462862	-0.115893	-0.150517	0.0581281	-0.0694275	0.0891053	-0.491267	-0.274426	0.0736167	-0.0694275	-0.162359	-0.413824	-0.131382	-0.367358	-0.258938	-0.305403	-0.255291	-0.305403	-0.196983	-0.413824	0.15106	-0.224314	-0.177848	0.00801549	-0.444801	0.0389927	-0.104051	-0.22796	-0.00382638	-0.181495	-0.177848	-0.754573
		74	-0.231715	0.0889225	-0.107806	0.82313	-0.340136	0.3347	-0.107806	-0.231715	0.456026	0.0424567	0.440538	-0.309158	-0.216227	-0.169761	-0.154272	-0.324647	0.489586	-0.045852	-0.154272	-0.123295	-0.123295	0.272746	-0.169761	0.520563	-0.123295	-0.216227	-0.309158	0.474098	-0.262692	-0.154272	-0.200738	-0.309158	-0.200738	-0.0923178	-0.309158	-0.0613406	-0.278181	-0.231715	-0.045852	-0.340136	-0.0148748	0.000613851	-0.123295	-0.216227	-0.0768292	-0.231715	-0.649908
		75	-0.238504	-0.350424	-0.16456	-0.361415	-0.386896	0.247967	-0.154567	-0.268483	-0.265981	-0.376903	-0.261484	-0.255988	-0.14307	-0.14657	-0.121088	-0.25149	0.492791	-0.0126679	-0.141074	-0.15007	-0.15007	0.245971	-0.156563	0.473803	-0.160063	-0.233008	-0.216016	0.43733	-0.329439	-0.181047	-0.167554	-0.375905	-0.217519	-0.159065	-0.335933	-0.118094	-0.344928	-0.308455	-0.112599	-0.376903	-0.0316562	-0.05614	-0.180049	-0.252994	-0.143576	-0.25849	-0.686675
		76	-0.415456	-0.465421	-0.465421	-0.445435	-0.455428	0.163946	-0.455428	-0.445435	-0.36549	-0.445435	-0.345504	-0.355497	-0.335511	-0.385477	-0.375483	-0.335511	0.253884	-0.375483	-0.39547	-0.435442	-0.435442	0.223905	-0.39547	0.203919	-0.445435	-0.425449	-0.315525	0.213912	-0.475415	-0.435442	-0.375483	-0.475415	-0.425449	-0.475415	-0.435442	-0.465421	-0.475415	-0.485408	-0.475415	-0.445435	-0.425449	-0.465421	-0.465421	-0.445435	-0.475415	-0.435442	-0.445435
		77	-0.455315	-0.211683	-0.65208	-0.338496	-0.642087	-0.241662	-0.495288	-0.485295	-0.845747	-0.632094	-0.238565	-0.835753	0.211825	-0.718934	-0.562142	-0.522169	-0.298523	-0.85574	-0.435329	-0.328503	-0.181704	-0.328503	-0.28853	-0.20169	-0.338496	-0.31851	-0.355384	-0.485295	-0.515274	0.258693	-0.415343	-0.515274	-0.612107	-0.0748774	-0.328503	-0.0648843	-0.221676	-0.378468	-0.0748774	-0.191697	-0.171711	-0.505281	-0.798879	-0.191697	-0.662073	-0.034905	-0.191697
		78	-0.443897	-0.150299	-0.590696	-0.297098	-0.590696	-0.150299	-0.443897	-0.34361	-0.884293	-0.590696	-0.297098	-0.884293	0.143299	-0.737495	-0.590696	-0.590696	-0.297098	-0.884293	-0.443897	-0.297098	-0.150299	-0.297098	-0.297098	-0.150299	-0.297098	-0.297098	-0.443897	-0.443897	-0.443897	0.290098	-0.443897	-0.443897	-0.590696	-0.00350014	-0.297098	-0.00350014	-0.150299	-0.297098	-0.00350014	-0.150299	-0.150299	-0.443897	-0.737495	-0.150299	-0.590696	-0.00350014	-0.150299
		79	-0.00946182	-0.155884	-0.596281	-0.302683	-0.596281	-0.155884	-0.449482	-0.349195	-0.449858	-0.596281	-0.302683	-0.00983858	0.137714	-0.30306	-0.596281	-0.156261	-0.302683	-0.889878	-0.449482	0.137337	-0.155884	-0.302683	-0.302683	-0.155884	-0.302683	-0.302683	-0.449482	-0.00946182	-0.449482	0.284513	-0.449482	-0.449482	-0.596281	-0.00908506	-0.302683	-0.00908506	-0.155884	-0.302683	-0.00908506	-0.155884	-0.155884	-0.449482	-0.743079	-0.155884	-0.596281	-0.00908506	-0.155884
		80	0.0502356	-0.30765	-0.348717	-0.348717	-0.348717	-0.430852	-0.266583	-0.289498	0.0502356	-0.348717	-0.389784	0.613457	-0.348717	0.0502356	-0.30765	0.00916837	-0.430852	-0.30765	-0.30765	0.00916837	-0.389784	-0.30765	-0.184448	-0.30765	-0.389784	-0.225515	-0.266583	0.0913028	-0.348717	-0.266583	-0.348717	-0.389784	-0.348717	-0.30765	-0.30765	-0.389784	-0.30765	-0.348717	-0.348717	-0.348717	-0.225515	-0.266583	-0.348717	-0.430852	-0.348717	-0.430852	-0.348717
		81	-0.0215963	-0.379482	-0.420549	-0.420549	-0.420549	-0.502683	-0.234963	-0.358165	0.0818553	-0.213646	-0.461616	0.541625	-0.420549	0.185307	-0.27603	-0.0626635	-0.399232	-0.27603	-0.379482	-0.0626635	-0.461616	-0.379482	-0.25628	-0.27603	-0.358165	-0.297347	-0.131511	0.019471	-0.420549	-0.338414	-0.420549	-0.461616	-0.420549	-0.27603	-0.379482	-0.461616	-0.379482	-0.420549	-0.317097	-0.317097	-0.297347	-0.338414	-0.420549	-0.502683	-0.213646	-0.502683	-0.420549
		82	-0.2477	-0.359036	-0.206633	-0.400103	-0.206633	-0.385502	-0.117782	-0.144249	-0.434454	0.0970052	-0.537905	-0.414703	-0.109898	-0.331002	-0.158849	-0.578972	-0.475521	-0.255584	-0.455771	-0.578972	-0.44117	-0.359036	-0.139099	-0.0621141	-0.240984	-0.180166	0.275875	-0.400103	-0.496838	-0.317968	-0.303368	-0.44117	-0.496838	-0.352319	-0.0688306	-0.2477	-0.262301	-0.206633	-0.103181	-0.199916	-0.180166	-0.414703	-0.206633	-0.0952973	-0.1932	-0.288767	-0.206633
		83	0.0265335	-0.395095	0.0265335	0.40346	0.0265335	0.0438777	-0.194909	-0.0981736	-0.388379	0.102013	-0.377751	-0.035513	0.237348	-0.0567685	0.261409	-0.377751	-0.0461408	-0.291644	-0.605909	-0.49183	-0.395095	-0.509174	0.0438777	-0.0981736	-0.308988	-0.29836	0.0846687	-0.509174	-0.49183	-0.509174	-0.412439	-0.509174	-0.605909	-0.388379	-0.10489	-0.315704	-0.29836	-0.315704	-0.0981736	-0.0808293	-0.184281	-0.605909	-0.201625	-0.122234	-0.302271	-0.201625	-0.315704
		84	0.189275	-0.395509	0.0261197	0.647778	0.0261197	0.288196	-0.0540415	0.124271	-0.329089	-0.0237264	-0.296587	0.0456507	0.400089	-0.10093	0.157543	-0.296587	-0.150006	-0.313931	-0.524746	-0.410666	-0.232354	-0.346433	0.206619	-0.202039	-0.412853	-0.217196	-0.122648	-0.509588	-0.492244	-0.264856	-0.331276	-0.183278	-0.443168	-0.492244	0.057851	-0.234541	-0.135619	-0.152963	-0.202039	-0.103117	-0.103117	-0.443168	-0.120461	-0.122648	-0.509588	-0.202039	-0.234541
		85	-0.0245116	-0.415825	-0.187667	0.627462	-0.187667	0.171145	-0.171093	-0.0895152	-0.114755	-0.334248	-0.220168	0.122069	0.0895677	0.113404	0.040492	0.193578	0.0643283	-0.334248	-0.448327	-0.334248	-0.25267	-0.366749	0.0895677	-0.415825	-0.529904	-0.334248	-0.391989	-0.391989	-0.415825	-0.147256	-0.448327	-0.203595	-0.366749	-0.415825	-0.25267	-0.448327	-0.25267	-0.366749	-0.27791	-0.220168	-0.220168	-0.366749	-0.334248	-0.529904	-0.391989	-0.415825	-0.448327
		86	-0.322291	-0.404772	-0.404772	-0.186931	-0.458555	-0.16004	-0.240713	-0.159136	-0.130593	-0.350086	-0.376977	-0.403868	-0.322291	-0.130593	-0.404772	0.0367697	-0.34753	-0.403868	-0.403868	-0.376977	-0.322291	-0.2954	-0.268508	-0.404772	-0.485446	-0.403868	-0.266856	-0.320639	-0.485446	-0.102798	-0.403868	-0.159136	-0.268508	-0.458555	-0.268508	-0.403868	-0.322291	-0.2954	-0.320639	-0.296303	-0.350086	-0.241617	-0.350086	-0.485446	-0.34753	-0.485446	-0.403868
		87	-0.43545	-0.314439	-0.314439	-0.354776	-0.395113	-0.314439	-0.43545	-0.43545	-0.147902	-0.354776	-0.395113	-0.43545	-0.43545	-0.147902	-0.314439	0.225508	-0.228576	-0.43545	-0.43545	-0.395113	-0.43545	-0.395113	-0.354776	-0.314439	-0.43545	-0.43545	-0.107565	-0.188239	-0.43545	-0.228576	-0.43545	-0.43545	-0.354776	-0.395113	-0.354776	-0.43545	-0.43545	-0.395113	-0.188239	-0.274102	-0.354776	-0.314439	-0.354776	-0.43545	-0.228576	-0.43545	-0.43545
[truncated: 263 more columns]

## Sheet: Figure 5–figure supplement 3A_2
Figure 5–figure supplement 3A (prop.)	Data	Changes in event-related firing activity of HR type neurons during the acquisition phase of auditory discrimination task
	Subjects
	Softwear
	Dependent variable	Proportion of neurons (%)
	Stats
	Proportion of neurons in the aDLS at the early stage							Proportion of neurons in the aDLS at the middle stage							Proportion of neurons in the aDLS at the late stage
			CO	CR	RS	FL				CO	CR	RS	FL				CO	CR	RS	FL
	HR type	INC	4.74576	17.6271	14.5763	9.15254		HR type	INC	7.96703	20.0549	10.1648	8.51648		HR type	INC	11.9444	20.8333	12.2222	13.6111
		DEC	1.35593	11.8644	10.8475	32.2034			DEC	1.37363	24.4505	24.1758	46.4286			DEC	2.5	36.3889	34.1667	50.2778
	Proportion of neurons in the pVLS at the early stage							Proportion of neurons in the pVLS at the middle stage							Proportion of neurons in the pVLS at the late stage
			CO	CR	RS	FL				CO	CR	RS	FL				CO	CR	RS	FL
	HR type	INC	4.5977	12.6437	6.89655	19.5402		HR type	INC	4.54545	19.0909	23.6364	39.0909		HR type	INC	13.6842	21.5789	8.94737	33.6842
		DEC	1.14943	16.092	16.092	25.2874			DEC	19.0909	20	3.63636	10			DEC	4.73684	18.4211	21.0526	26.8421

## Sheet: Figure 5–figure supplement 3B_1
Figure 5–figure supplement 3B (maps)	Data	Changes in event-related firing activity of LL type neurons during the acquisition phase of auditory discrimination task
	Subjects
	Softwear
	Dependent variable
	Stats
	Z-scored event-related firing rate in the aDLS at the early stage
			Time bin
			1	2	3	4	5	6	7	8	9	10	11	12	13	14	15	16	17	18	19	20	21	22	23	24	25	26	27	28	29	30	31	32	33	34	35	36	37	38	39	40	41	42	43	44	45	46	47
	# of neurons	1	0.873184	-0.283501	0.873184	0.873184	0.873184	-0.283501	0.873184	0.873184	-0.283501	-0.283501	0.873184	0.873184	0.873184	0.873184	-0.283501	0.873184	-0.283501	-0.283501	-0.283501	0.873184	-0.283501	-0.283501	-0.283501	-0.283501	-0.283501	0.873184	-0.283501	0.873184	0.873184	0.873184	-0.283501	0.873184	-0.283501	0.873184	-0.283501	-0.283501	-0.283501	-0.283501	-0.283501	-0.283501	-0.283501	-0.283501	-0.283501	-0.283501	-0.283501	-0.283501	-0.283501
		2	1.33606	0.12985	0.900974	0.68343	1.11852	0.238621	0.574658	1.00975	0.0210779	0.12985	0.68343	1.11852	0.68343	0.900974	-0.196466	1.11852	0.238621	0.238621	0.0210779	0.68343	0.347393	-0.414009	0.12985	-0.196466	0.456165	0.900974	0.0210779	0.357115	0.357115	0.248343	-0.0876939	0.574658	0.347393	0.68343	-0.0876939	-0.196466	0.0210779	-0.0876939	-0.414009	0.347393	0.0210779	-0.196466	0.0210779	-0.305237	0.0210779	0.456165	0.0210779
		3	2.47123	0.201967	0.201967	-0.0155766	0.419511	0.310739	-0.124348	0.310739	0.0931952	0.201967	-0.0155766	0.419511	-0.0155766	0.201967	-0.124348	0.419511	0.310739	0.310739	0.0931952	-0.0155766	0.419511	-0.341892	0.201967	-0.124348	0.528282	0.201967	1.01028	-0.341892	-0.341892	-0.450664	-0.0155766	-0.124348	0.419511	0.90151	-0.0155766	-0.124348	1.01028	-0.0155766	-0.341892	0.419511	1.01028	-0.124348	0.0931952	-0.23312	1.01028	0.528282	0.0931952
		4	2.47123	0.201967	0.201967	-0.0155766	0.419511	0.310739	-0.124348	0.310739	0.0931952	0.201967	-0.0155766	0.419511	-0.0155766	0.201967	-0.124348	0.419511	0.310739	0.310739	0.0931952	-0.0155766	0.419511	-0.341892	0.201967	-0.124348	0.528282	0.201967	1.01028	-0.341892	-0.341892	-0.450664	-0.0155766	-0.124348	0.419511	0.90151	-0.0155766	-0.124348	1.01028	-0.0155766	-0.341892	0.419511	1.01028	-0.124348	0.0931952	-0.23312	1.01028	0.528282	0.0931952
		5	2.68579	0.404952	0.628283	0.777171	0.851614	0.55384	0.702727	0.777171	0.330508	-0.265041	0.0327336	-0.116154	-0.339485	-0.190597	0.181621	0.107177	-0.116154	0.0327336	-0.190597	0.479396	0.107177	-0.190597	-0.265041	-0.413929	0.107177	-0.413929	0.577602	-0.488372	-0.190597	-0.488372	-0.265041	-0.190597	0.0327336	0.652046	-0.190597	-0.190597	0.726489	-0.190597	-0.339485	-0.190597	0.652046	-0.265041	-0.190597	0.256065	0.652046	-0.265041	-0.116154
		6	0.968498	0.521836	0.745167	0.894054	0.968498	0.670723	0.819611	0.894054	0.447392	-0.148158	0.149617	0.00072984	-0.222601	-0.0737139	0.298505	0.224061	0.00072984	0.149617	-0.0737139	0.596279	0.224061	-0.0737139	-0.148158	-0.297045	0.224061	-0.297045	-0.222601	-0.371489	-0.0737139	-0.371489	-0.148158	-0.0737139	0.149617	-0.148158	-0.0737139	-0.0737139	-0.0737139	-0.0737139	-0.222601	-0.0737139	-0.148158	-0.148158	-0.0737139	0.372948	-0.148158	-0.148158	0.00072984
		7	1.32152	1.23675	0.917242	0.704239	1.32152	0.480908	0.810741	1.24708	0.981358	-0.518918	0.140747	0.172805	-0.231471	-0.263529	0.832471	0.396136	-0.189085	0.683584	-0.0825837	0.768355	0.215191	-0.0825837	0.023918	-0.124969	0.215191	-0.48686	-0.412417	-0.0184677	-0.0825837	0.162478	-0.337973	-0.0825837	0.140747	0.023918	-0.0825837	0.0983617	0.0983617	0.0983617	-0.231471	0.0983617	0.023918	0.385809	-0.0825837	0.545024	0.385809	0.204863	0.534696
		8	0.759552	1.87537	-0.0245377	0.216716	0.608766	0.0659298	0.246875	0.45798	1.09128	-0.416588	-0.205483	0.126248	-0.054697	-0.386429	0.940498	-0.175324	-0.386429	0.940498	-0.356269	0.126248	0.0960891	0.397661	-0.0245377	0.126248	-0.205483	0.518288	0.216716	0.45798	0.0960891	0.940498	-0.235642	0.699234	0.246875	0.880179	0.397661	0.277035	-0.0245377	1.03097	0.0960891	0.427821	1.18175	0.940498	0.246875	0.126248	1.09128	0.45798	0.337353
		9	0.35391	2.78027	-0.055741	0.372732	0.390343	-0.339713	-0.158767	0.0523374	0.872861	-0.447791	-0.236686	0.0950451	-0.46034	-0.792071	1.09651	-0.393747	-0.0431926	0.909294	-0.0130333	0.656704	-0.122334	0.553678	-0.242961	-0.279394	-0.236686	1.04874	0.372732	0.0523374	-0.122334	1.65817	-0.266846	1.04247	0.215672	0.661756	0.366458	0.433051	-0.055741	0.625323	-0.122334	1.1455	1.71221	0.909294	0.0284523	0.0950451	0.872861	0.426777	0.11893
		10	-0.1879	2.86917	-0.218085	1.16784	-0.349986	-0.140166	0.653913	-0.290952	0.547146	-0.0672991	-0.218085	-0.0672991	-0.441738	-0.394005	0.572279	-0.159051	-0.0421657	-0.0119803	0.204088	0.891399	0.690347	1.16784	-0.603825	-0.243219	-0.218085	1.44681	0.373759	-0.0924324	-0.103733	1.7295	-0.0672991	1.45811	1.02835	0.499412	1.17914	0.667746	-0.218085	0.661498	-0.500772	0.983152	1.54986	0.385059	0.0470535	-0.265819	1.1427	0.282007	-0.405305
		11	-0.321053	2.83445	0.130139	1.15645	0.398246	0.4863	0.793312	0.121	0.506739	0.495439	0.251906	0.130139	-0.2443	0.441286	0.317359	0.218193	0.306059	-0.0233671	0.581332	0.723538	0.858766	0.547619	-0.377367	-0.0457801	0.00837284	0.890318	-0.00292733	-0.41108	-0.300613	1.10928	0.130139	1.26692	1.53305	-0.42238	0.558919	0.349099	-0.23516	-0.41108	-0.697653	0.513718	0.326499	-0.23516	-0.0570802	-0.0683804	0.980532	1.05926	0.186453
		12	-0.0767408	2.63431	1.29915	1.27215	0.455339	1.16366	1.47067	1.2314	0.996876	0.365312	0.121779	1.24711e-05	1.24711e-05	0.685599	1.24711e-05	0.70833	0.234537	1.14564	0.942854	0.464797	0.915858	0.230272	-0.320274	0.198532	0.31129	0.631576	0.11277	-0.166767	-0.243521	1.09636	1.24711e-05	2.06148	2.26901	0.500801	0.861836	0.464797	-0.365287	-0.166767	-0.64056	-0.365287	0.067757	-0.365287	1.29915	-0.198507	1.47067	0.929132	0.243546
		13	0.179688	2.42886	2.68385	0.999857	1.17565	1.75228	0.469141	1.28931	0.856265	0.688579	0.445046	0.0579215	0.32328	0.279629	0.32328	1.43063	0.225607	1.86595	0.536885	-0.139692	0.179688	0.488697	0.201513	0.853996	0.103841	1.5524	0.369199	-0.572737	-0.45097	0.55871	-0.207437	2.51843	1.53284	0.824069	0.125666	0.125666	-0.307378	-0.572737	0.0797466	-0.572737	0.125666	-0.572737	1.0917	-0.207437	0.469141	0.523163	0.0360963
		14	0.573503	1.5628	4.01444	0.456891	0.0238472	0.72225	-0.0738252	0.624577	0.191533	0.431354	0.431354	-0.241511	0.431354	-0.506869	0.431354	1.25297	1.1487	1.32298	1.17423	0.741189	-0.241511	2.18459	0.0238472	1.77709	-0.0738252	1.66047	0.59904	0.308145	-0.0993621	1.03208	-0.0993621	1.8537	0.624577	1.29744	0.59904	0.191533	-0.241511	-0.506869	0.0238472	-0.506869	0.191533	-0.506869	0.792263	-0.506869	-0.0738252	-0.506869	-0.506869
		15	1.16307	1.28628	3.87216	0.0461381	1.1807	0.311496	0.649982	-0.21922	0.91534	0.453645	0.453645	0.91534	0.453645	-0.484578	0.453645	0.842213	1.30522	0.0461381	0.330436	0.330436	-0.21922	3.34144	0.0461381	1.79938	-0.484578	1.24972	1.32285	0.330436	-0.0770712	0.188287	-0.0770712	0.576855	-0.21922	1.02093	0.188287	-0.21922	-0.21922	-0.484578	0.0461381	-0.484578	-0.21922	-0.484578	-0.484578	-0.484578	-0.484578	-0.484578	-0.484578
		16	1.04484	1.92758	3.9017	0.215506	1.16574	-0.153137	0.797102	-0.52178	0.61278	-0.114273	-0.114273	0.981423	0.0700487	0.215506	0.25437	0.0311845	1.26802	0.399828	0.661878	0.846199	-0.337459	2.42713	0.0311845	1.06938	-0.153137	0.807335	1.38893	0.661878	0.623013	0.25437	0.623013	-0.153137	-0.153137	1.00597	0.623013	-0.153137	-0.153137	0.399828	0.0311845	0.0311845	0.584149	-0.153137	-0.153137	-0.337459	-0.52178	0.0311845	-0.337459
		17	0.745437	2.03569	2.16204	1.35637	1.05611	0.362479	1.93797	-0.00616452	0.815771	-0.31879	0.306461	0.871788	-0.134468	0.418496	0.0498534	0.859425	-0.0641348	0.602818	0.362479	0.859425	-0.134468	0.687467	0.859425	0.987729	0.362479	0.602818	1.18441	0.675104	0.105871	0.0498534	0.105871	0.362479	0.0498534	0.48883	0.105871	-0.262772	-0.262772	0.290193	0.5468	-0.0784503	1.41239	0.0498534	-0.262772	-0.134468	-0.31879	-0.0784503	-0.447093
		18	0.789402	2.32291	1.39547	2.45413	0.289537	1.21698	0.928137	0.605081	0.0491978	0.292455	0.917706	-0.138042	-0.252996	1.02974	0.174583	0.984155	-0.263427	0.727548	1.46024	0.740898	-0.252996	-0.565621	0.740898	0.869201	0.243951	0.48429	-0.0686742	1.04309	0.230601	0.174583	-0.0126563	0.243951	-0.0686742	-0.196978	0.230601	-0.381299	-0.381299	0.171665	0.428273	0.0462797	1.53712	0.661099	0.348473	0.233519	0.0491978	-0.196978	-0.565621
		19	1.20335	1.80997	0.516523	3.04183	1.06155	1.62829	1.70544	1.20335	0.829148	1.25408	1.51598	-0.0900883	0.160956	1.07241	0.585891	1.02946	0.879877	0.404214	1.87155	1.51291	0.160956	-0.151669	0.60453	0.735478	-0.0714495	-0.202398	-0.384075	0.727691	-0.453442	-0.140817	-0.6967	-0.0714495	-0.384075	-0.515023	-0.271765	-0.515023	-0.515023	-0.6967	-0.0714495	-0.453442	0.484433	0.345698	0.0330728	0.10244	0.10244	-0.6967	-0.6967
		20	1.33831	1.44052	0.940463	3.22406	1.82176	1.59511	0.542619	0.833912	0.940463	1.3654	0.66578	0.333851	0.608534	1.01559	0.865337	0.515528	1.30382	0.515528	1.5021	0.998979	0.440402	-0.232125	0.258725	-0.259215	-0.440892	-0.0910835	-0.272761	0.213755	-0.365766	-0.365766	-0.440892	0.231634	0.0635028	-0.0910835	0.152174	0.24518	0.413312	-0.104629	-0.777156	-0.029503	-0.533898	0.625144	0.625144	-0.29064	0.0456229	0.231634	0.231634
		21	1.01351	0.751213	0.737668	2.89777	3.1953	1.26957	1.18936	0.751628	0.495155	0.676832	0.704753	0.49557	0.770998	0.569536	1.02706	0.555991	0.858509	0.434734	1.05456	1.2827	1.45166	0.536621	0.784958	0.145761	0.206597	0.313893	0.253472	0.253472	0.159722	-0.689073	-0.157172	0.394098	0.225967	-0.0498761	0.0713803	0.407644	0.697032	-0.0634214	-0.614692	0.132216	0.234103	0.664117	0.90663	0.234103	-0.0359156	0.636611	0.272842
		22	0.975572	0.806696	0.67031	1.67635	3.03968	0.745436	0.635812	0.713689	0.427798	0.275539	0.819073	0.791567	0.276283	0.34992	0.80744	0.518052	0.123281	-0.05998	1.13946	0.822569	0.956946	0.194165	1.23321	0.318918	0.409172	0.182533	0.151531	0.303789	0.362297	-0.638756	0.502179	1.20571	0.885317	0.275539	0.244537	0.428542	1.17471	0.139154	-0.1076	0.48705	1.35023	1.01895	1.71824	0.893454	0.471177	0.534669	0.323159
		23	0.405812	0.741332	0.436815	0.434062	4.17874	0.343808	0.738579	0.648325	0.194302	0.0420432	0.92184	0.558071	1.41534	1.99338	0.405812	0.284556	-0.110215	-0.293476	1.0741	0.589073	0.555319	0.465065	0.831586	0.253554	0.343808	-0.0509631	-0.0819652	0.0702933	0.465065	-0.535989	0.436815	0.467817	0.315558	0.0420432	0.0110411	-0.141217	0.436815	-0.262474	0.1633	0.253554	1.62113	0.617323	1.31661	1.16435	0.405812	-0.203222	-0.414732
		24	0.462927	0.919702	0.615185	-0.428462	3.65001	0.15841	0.310668	0.0283132	1.0498	0.0283132	0.180572	0.180572	1.28036	1.73713	0.0283132	0.462927	0.310668	-0.428462	0.33283	0.33283	-0.428462	0.593023	0.33283	0.310668	-0.276204	-0.428462	-0.580721	-0.428462	0.593023	0.440765	1.0498	0.767444	0.615185	0.462927	0.310668	-0.276204	1.48441	0.15841	0.0283132	0.310668	1.07196	-0.123945	0.33283	0.615185	0.0283132	0.288506	0.00615114
		25	0.485847	1.00078	-0.0290837	0.0512332	4.09376	1.00078	-0.0290837	0.0512332	0.40553	0.566164	0.0512332	0.0512332	1.24512	1.24512	-0.463697	0.485847	-0.0290837	0.0512332	-0.463697	0.0512332	0.566164	0.92046	-0.463697	0.485847	-0.463697	-0.463697	-0.463697	-0.463697	0.92046	0.40553	0.40553	-0.0290837	-0.0290837	-0.0290837	0.485847	-0.463697	0.840143	-0.0290837	-0.463697	-0.0290837	1.00078	-0.463697	-0.463697	-0.0290837	-0.463697	0.40553	-0.0290837
		26	0.454823	1.3779	0.348044	0.428361	3.57837	1.99013	0.143968	0.632437	0.782658	0.53514	-0.183867	0.224285	-0.698797	-0.494721	-0.290645	0.454823	-0.0601076	0.428361	-0.698797	0.428361	0.943291	0.68536	-0.494721	0.658899	-0.494721	-0.290645	-0.290645	-0.0865693	1.29759	0.578582	0.374506	0.348044	0.55212	0.55212	1.06705	-0.0865693	0.809119	0.348044	-0.290645	-0.0601076	1.17383	-0.0865693	-0.698797	0.143968	-0.698797	0.578582	0.143968
		27	0.234413	1.15749	0.307676	0.462523	3.74902	1.94976	-0.256483	1.20672	-0.0524072	0.38926	0.210378	0.258447	-0.484593	0.259606	0.1036	0.234413	-0.280518	0.642565	-0.844676	0.642565	0.797412	0.570461	0.0795651	0.078406	0.0795651	-0.256483	-0.256483	0.127634	1.00265	0.283641	0.0795651	0.127634	0.511751	1.23192	1.20672	0.667758	-0.280518	0.847799	-0.256483	-0.100476	1.3135	0.487717	-0.124511	-0.256483	-0.304552	0.463682	-0.0764417
		28	0.183325	0.125027	0.771518	0.877886	2.20162	1.38375	1.14026	0.689185	0.411436	-0.643208	-0.30716	-0.25909	-0.0207506	0.723449	0.100992	-0.283125	0.649776	0.125027	-0.847284	0.125027	0.231394	0.0529231	0.0769577	-0.439132	0.0769577	-0.25909	-0.25909	0.125027	0.485109	0.281034	0.0769577	0.125027	1.90849	1.22931	1.62209	2.0645	0.183325	0.845192	-0.25909	0.829817	0.281034	0.485109	0.805782	0.20736	-0.30716	0.461075	-0.0790491
		29	0.712086	-0.0785995	0.892128	0.836378	1.99228	0.405774	2.43765	0.119365	0.369927	-0.114447	-0.222794	-0.258641	1.03632	0.765857	-0.222794	0.245636	0.530066	-0.402835	-0.114447	-0.0785995	0.189886	0.623642	0.119365	-0.438682	0.443601	-0.420759	-0.420759	-0.402835	0.119365	0.281483	0.119365	-0.240717	1.66291	0.335254	0.728031	1.86088	0.225733	0.31733	-0.420759	0.710107	0.119365	0.119365	1.05227	0.207809	-0.0606759	-0.0248286	-0.564953
		30	0.441185	0.112986	1.48178	1.43925	0.692331	0.186075	2.80928	0.76022	0.741554	0.437222	-0.0956276	0.459851	0.881042	0.186075	-0.558114	-0.0252651	0.259165	-0.442493	0.0903566	0.112986	0.394689	0.275104	-0.280375	-0.118257	0.159482	0.182112	-0.164753	-0.442493	-0.164753	-0.00263554	0.297733	0.0664901	1.55883	-0.373367	1.36889	1.39672	0.648562	-0.326871	-0.164753	0.60603	-0.0491316	-0.164753	0.768147	1.04192	0.528977	-0.142124	-0.257745
		31	0.226056	0.364307	1.08844	1.1141	1.12187	-0.207268	1.66125	1.90261	0.704638	1.57961	-0.200734	0.711172	0.309485	-0.207268	-0.841435	0.226056	-0.600629	-0.547599	-0.192964	0.00787935	-0.176868	0.526424	-0.563695	-0.223364	0.232589	0.077005	0.442995	-0.369386	-0.0916463	0.0704714	0.37084	0.674238	0.232589	0.0561673	0.865519	0.605113	0.077005	-0.253764	-0.26986	-0.0755503	-0.154238	-0.26986	0.621208	0.470366	0.602084	-0.0690168	-0.362852
		32	-0.351259	0.111228	0.511122	1.44651	0.805807	-0.298229	0.858837	1.81165	1.78466	1.0023	0.618031	1.2057	-0.592065	-0.298229	-0.0226694	-0.351259	0.218136	-0.476443	-0.770278	-0.2452	-0.592065	0.111228	-0.654657	-0.476443	-0.182608	-0.0139564	1.09964	-0.298229	-0.182608	-0.182608	0.279879	0.583277	-0.182608	0.289441	1.09879	0.352033	-0.0139564	1.31261	-0.360821	0.743215	-0.2452	-0.360821	0.530247	0.217287	0.511122	0.164257	-0.129578
		33	0.034169	0.034169	-0.326979	0.772337	0.777058	-0.326979	0.41591	1.10817	1.52467	1.83991	0.791219	1.33058	0.0436099	-0.509913	0.0642028	0.217103	0.786498	-0.322258	-0.683406	-0.688127	-0.505193	-0.331699	-0.683406	-0.688127	-0.326979	-0.505193	0.955271	-0.509913	-0.509913	-0.326979	-0.509913	0.207662	0.221824	0.395317	0.212383	0.573531	-0.688127	1.16824	-0.688127	0.598844	-0.688127	-0.688127	0.202942	-0.322258	-0.326979	-0.144045	-0.322258
		34	0.0637519	-0.30378	-0.302948	0.0779606	0.812193	-0.302948	0.261727	0.797984	1.19227	1.34595	2.83112	1.54393	0.245854	-0.485882	0.628427	0.0629199	1.54559	0.0637519	0.24835	-0.11835	0.0645838	0.432948	0.0645838	0.249182	0.24835	-0.119182	0.628427	-0.669648	-0.669648	-0.486714	-0.485882	-0.302948	0.245854	0.430452	0.247518	-0.120846	-0.669648	1.19227	-0.11835	0.995959	0.0654157	0.249182	0.0654157	-0.120014	-0.302948	-0.30378	-0.30378
		35	0.508192	0.14066	0.436451	0.364709	0.214066	0.731409	-0.336401	1.83234	-0.153467	1.49544	3.41283	0.650843	0.100377	-0.336401	0.325258	0.212402	1.24242	0.508192	0.397832	0.621049	-0.080893	0.877388	-0.080893	0.103705	0.69279	0.0302995	0.0302995	-0.520167	-0.225208	-0.042274	-0.0414421	-0.153467	0.985253	0.579934	0.691958	0.0286356	-0.520167	-0.153467	-0.263827	0.397832	0.804815	0.693622	0.509856	0.619385	0.436451	-0.449257	-0.154298
		36	0.216825	0.118582	0.328018	0.977787	0.105633	0.892265	-0.261899	2.43519	0.276677	0.827975	4.9099	0.349251	-0.28757	0.00738895	0.486114	0.00738895	1.57599	0.216825	0.289399	0.69555	0.0799624	0.95189	0.349251	0.716783	0.584358	0.191155	0.999019	0.362199	-0.150707	0.118582	0.0330594	0.276677	0.597306	0.374921	0.66988	-0.176377	0.092911	-0.261899	0.618539	0.558687	1.68718	1.84528	0.584358	0.597306	0.866594	-0.740624	-0.176377
		37	0.487002	0.517324	0.542994	1.37653	-0.0469229	1.10724	-0.285889	2.39304	0.491653	0.491653	3.52618	0.913593	0.166373	0.461331	0.75629	0.939264	0.816934	-0.229897	-0.0469229	0.0650619	-0.550526	0.00906949	0.196695	-0.0422715	0.00906949	-0.255567	1.03023	0.760942	0.00906949	0.278358	-0.229897	0.252687	0.573316	-0.255567	0.0393914	-0.255567	0.013721	0.431009	-0.0119495	0.222365	1.58982	1.32519	0.725968	1.05125	1.08157	0.136051	0.222365
		38	0.440014	0.341753	0.0724651	0.611041	0.458214	0.856084	-0.0379183	2.52763	1.25396	0.99679	2.33715	1.71369	1.73796	0.966468	0.709302	1.4444	0.898529	-0.53405	0.0724651	-0.0197189	-0.136179	0.219247	1.12537	0.886406	0.219247	-0.00759638	1.02103	0.623164	-0.55225	0.102787	-0.53405	0.629241	-0.154379	-0.264762	-0.264762	-0.00759638	-0.124057	0.936146	0.273814	0.598919	1.24788	1.14962	0.550397	0.709302	0.482459	0.164649	0.0845876
		39	1.00934	0.359341	0.359341	0.641793	1.02754	1.15612	0.531409	1.73735	1.00226	0.462638	0.187273	1.46199	3.45026	2.11386	0.444439	1.74444	0.0950894	-0.247174	0.641793	0.83206	0.16386	0.788575	0.591221	0.352255	0.506124	-0.27246	-0.0516929	0.667079	-0.547825	0.96773	-0.247174	0.377541	-0.13679	0.0352776	0.317729	0.292443	-0.375757	0.940571	-0.247174	0.898958	0.72689	0.359341	1.11973	0.72689	0.230759	0.169074	-0.180276
		40	1.00276	0.437369	0.591724	0.411111	1.56863	1.54286	0.385339	1.18309	0.771574	0.0776022	0.0263351	1.13183	3.28932	2.7247	0.59221	1.25992	0.412084	-0.154278	0.874176	1.54238	0.411111	0.79686	0.514894	0.514894	1.59489	-0.0252088	-0.282374	0.590752	-0.53954	1.28472	-0.154278	0.84889	-0.128506	0.128174	0.719335	0.694049	-0.128506	0.231957	7.70735e-05	0.976986	0.257243	0.283015	0.411111	0.411597	0.154432	-0.848249	-0.719667
		41	0.86604	0.429234	0.26018	0.0795673	1.49816	1.66721	0.248621	0.921696	0.443933	-0.316282	0.470191	0.737943	2.44735	3.30104	0.7789	1.18945	0.470191	0.936395	1.83627	1.14849	0.0795673	0.402976	-0.330981	-0.330981	1.52442	0.161481	0.48489	1.16319	-0.485336	1.27659	-0.357239	0.26018	-0.202884	-0.0747875	0.516373	0.557331	-0.202884	-0.161927	-0.202884	0.388277	0.443933	0.598288	0.402976	0.274879	0.274879	0.17618	-0.794045
		42	0.932	0.777645	0.157178	-0.00494368	0.962234	1.88364	0.013639	1.42058	0.491402	0.314581	1.10105	0.935884	0.950583	2.97106	1.56023	1.55635	1.10105	1.58575	1.90223	0.781529	-0.155415	0.920349	-0.00106007	0.149411	1.72236	1.09329	1.11575	0.495286	-0.00494368	0.326232	-0.30977	0.458121	-0.00494368	-0.30977	-0.302002	0.322348	-0.155415	0.318465	-0.456357	0.00282353	0.641873	0.194344	-0.28342	0.171877	0.322348	0.35563	-0.614595
		43	0.669739	0.358136	-0.105083	0.195859	1.01447	1.15542	0.680399	1.46703	0.692205	0.358136	0.993147	0.519267	0.842676	2.71458	3.01323	1.91729	1.61635	2.25251	1.32836	1.14247	-0.266215	1.12115	0.0453878	0.819064	0.842676	1.29409	1.31656	0.541734	0.195859	-0.0932773	0.35699	0.195859	0.195859	0.35699	-0.255554	0.0571938	0.0453878	0.519267	-0.255554	-0.105083	1.15428	0.240792	0.228986	0.529928	0.368796	0.55354	-0.416686
		44	1.34752	1.03592	0.20571	0.506652	1.19624	0.84119	1.01298	0.634995	0.183582	0.690719	0.829722	1.02445	0.506652	2.07694	3.7128	1.58127	1.79813	1.96006	1.20852	1.30246	-0.128021	0.935938	0.701379	0.957258	0.334053	1.13066	0.484524	-0.139488	0.334053	-0.278492	0.495185	0.506652	0.161454	1.18558	0.227838	-0.128021	0.52878	1.02445	0.0552388	0.20571	0.818255	-0.267831	-0.128828	0.517312	1.04658	-0.278492	-0.278492
		45	1.01428	0.508184	0.259053	0.259053	1.46489	0.551975	1.11035	0.475444	0.345781	0.422312	0.626147	1.03618	0.648043	1.61645	4.07191	1.46574	1.98354	1.65004	1.19944	1.57351	-0.0954849	0.410613	0.604251	0.839323	0.0216228	0.366821	-0.237704	-0.345471	0.151286	-0.0954849	0.462889	0.453548	-0.215808	1.21812	1.01514	0.0341784	0.820642	1.10101	1.03703	0.777707	1.02448	0.540276	0.225458	1.15414	1.33844	-0.160316	-0.0954849
		46	0.682743	0.488248	-0.0724844	0.348036	0.930664	0.53204	0.467208	0.984947	0.434763	1.24342	0.71513	0.704639	1.15755	1.08222	3.13231	0.511	1.86984	1.42742	2.02054	1.03929	-0.11542	1.34063	0.693234	0.72562	0.110605	0.876323	0.271799	-0.256489	0.240268	0.72562	0.240268	0.122011	0.293694	0.995496	1.10412	0.434763	0.489104	2.03103	0.705495	0.446169	0.801857	0.629258	0.00283769	0.511	1.42742	-0.180252	0.3051
		47	-0.196935	-0.0536618	-0.261767	0.158753	0.223585	0.335328	0.608265	1.30603	0.755848	1.38447	1.53544	0.166444	1.30603	0.547743	3.25851	1.16614	1.50053	0.547743	0.968263	1.01517	0.205665	1.8306	-0.0101307	0.708937	0.262806	1.02109	0.761767	-0.100573	0.223585	1.38447	0.0547009	-0.0672718	0.280726	0.457301	0.573354	0.586964	-0.041661	1.49284	1.19175	0.42577	0.781459	0.950343	1.00317	0.997254	1.72993	-0.196935	0.119533
		48	-0.00500341	0.332765	-0.525818	0.415517	-0.105298	-0.18805	0.410126	0.913397	1.2741	2.2928	1.59771	0.163881	0.913397	0.415517	3.64926	1.88105	1.43421	0.936331	0.575629	0.492877	0.332765	1.5028	-0.0137748	0.575629	0.323993	1.08228	1.34269	0.155109	-0.105298	2.03239	-0.274182	-0.525818	0.146338	0.063586	-0.274182	0.063586	-0.434295	0.904626	0.410126	-0.356934	0.063586	0.492877	0.99953	0.410126	1.59771	-0.265411	-0.274182
		49	0.0608995	0.954577	-0.459915	0.0608995	0.0959942	0.989672	0.476028	1.25008	2.0313	2.62948	1.799	0.785693	0.13826	1.17272	2.4536	1.94695	2.3268	1.13762	0.356402	0.13826	0.398668	0.863054	-0.368392	-0.199508	-0.0306238	0.307144	1.12346	-0.199508	-0.459915	1.25725	-0.628799	-0.459915	-0.628799	-0.291031	-0.0728899	0.264878	-0.368392	-0.291031	1.03194	-0.291031	-0.291031	0.13826	0.644913	1.03194	1.24309	-0.199508	-0.628799
		50	-0.132157	1.47486	-0.127419	-0.132157	0.165714	0.458847	-0.129788	0.719254	1.50048	2.02366	0.686529	0.686529	0.132988	2.03077	1.17225	1.17225	3.37264	0.944567	0.426121	-0.129788	0.656172	0.426121	0.132988	0.132988	0.132988	0.395765	0.423752	0.395765	-0.127419	0.388658	-0.390195	-0.390195	-0.390195	-0.652972	0.165714	0.42849	0.395765	0.135358	1.21445	0.135358	0.135358	0.132988	0.132988	0.951674	0.656172	0.132988	-0.652972
		51	0.109593	1.10796	-0.0952265	-0.133865	0.563093	0.734497	-0.358003	0.369311	0.734497	1.24073	0.441364	0.319635	0.0265022	2.39425	0.494098	0.372369	3.8409	0.665502	0.80655	0.250641	0.532736	0.563093	0.26996	0.635146	0.878603	0.776194	0.422045	0.411007	-0.216955	-0.499051	-0.479732	-0.114546	-0.236274	-0.62078	0.197906	0.582412	0.776194	0.411007	1.35142	0.897922	0.776194	0.26996	0.513417	1.08865	0.532736	0.26996	0.109593
		52	-0.0206319	0.421831	0.156647	-0.264089	-0.123042	-0.507547	-0.488228	-0.872733	-0.507547	0.189736	-0.24477	-0.17545	0.0873264	1.34325	0.363873	0.624242	3.57133	0.934613	0.693563	1.07566	0.59356	0.450105	0.330784	1.65121	2.08572	0.837018	0.309057	1.04498	0.225967	0.13492	0.154239	0.137328	0.0155988	-0.559955	-0.488228	-0.103723	0.645969	0.280783	0.856337	0.958747	0.645969	1.09498	0.574241	0.402511	0.59356	0.139735	-0.0206319
		53	0.671163	-0.165309	0.152017	0.370749	0.192063	0.0133768	-0.116166	-0.0670237	0.241205	0.390926	0.0133768	0.196611	0.367483	1.26873	1.02072	1.28109	3.25604	1.62641	1.46432	1.56164	0.553983	0.594338	0.440069	1.64659	2.13805	0.569612	0.773024	0.777572	-0.0634483	0.712801	0.355429	0.623303	0.38766	-0.26686	-0.287038	-0.0513948	0.606392	0.184248	0.326154	0.520469	0.378563	0.805564	0.854398	0.135106	0.440069	-0.377509	-0.0123225
		54	0.659201	-0.423887	0.300254	-0.253016	-0.309973	-0.0818434	0.602244	-0.0821441	1.00124	0.907508	0.488329	0.793293	0.393991	0.564863	0.0317702	0.698954	2.47208	2.18462	0.718831	0.816143	0.337034	0.662475	0.793293	1.06445	1.31246	0.394292	1.00452	0.397266	0.77669	1.30948	0.625395	0.813169	0.414169	-0.118623	-0.138801	-0.0248863	0.145985	0.089028	0.109206	-0.346752	0.203243	1.15879	0.108905	-0.36693	0.508206	-0.594458	0.260802
		55	0.636561	-0.00613617	0.335907	0.274833	0.107778	0.556102	1.68058	0.775997	1.3089	1.3544	0.90608	0.799799	0.620693	1.01176	0.339423	1.0649	1.58163	2.638	1.00383	0.498845	0.563736	0.286884	1.35029	0.00561474	0.833255	0.620994	0.739026	0.160919	0.401099	0.963037	0.27895	0.628627	0.449822	-0.442409	-0.0513424	0.282767	0.673833	0.726974	0.446005	-0.0099529	0.951286	0.84149	0.335607	0.271016	1.0652	-0.0666093	0.78865
		56	0.122391	-0.292478	-0.00739166	-0.182381	-0.292478	0.212803	1.22337	0.147912	1.61485	1.06806	0.562781	0.342586	-0.00739166	0.212803	-0.402576	0.322901	0.49789	3.87799	1.90207	0.804795	-0.00739166	0.934577	0.893074	0.539393	0.432999	0.277695	0.452684	-0.182381	1.21966	0.562781	-0.00739166	0.0574997	-0.00739166	0.319198	0.539393	-0.117489	0.102706	0.212803	0.102706	-0.182381	0.607987	1.66005	-0.292478	-0.072283	0.607987	0.102706	0.957965
		57	0.0525845	0.230879	0.230879	0.340977	0.230879	0.844218	1.02251	0.933365	1.391	0.320026	0.230879	0.665923	0.492975	0.844218	0.382877	1.34746	0.582122	3.89325	2.42542	1.7213	0.361927	1.01881	0.561172	1.03976	0.409174	0.230879	0.382877	0.209929	0.363571	-0.293312	-0.162264	-0.382459	-0.162264	0.557469	0.253473	0.251829	-0.183214	0.451074	0.340977	0.209929	0.692219	1.32815	-0.162264	0.582122	0.168028	-0.0521667	0.340977
		58	0.897435	0.63534	0.377043	0.377043	0.63534	1.28678	0.766388	0.639139	1.38897	0.245995	0.377043	0.773985	0.897435	0.51189	0.639139	1.67992	1.02468	3.56513	2.90609	2.42215	-0.0085024	0.868575	-0.13955	1.25792	-0.401646	0.377043	0.639139	-0.270598	0.213336	-0.663741	-0.532694	-0.274397	-0.532694	0.737527	0.213336	0.508091	-0.663741	0.118747	-0.13955	-0.270598	0.249794	1.25412	-0.274397	-0.0085024	-0.532694	-0.532694	-0.13955
		59	0.802621	0.540525	0.751904	0.282228	0.540525	1.19197	1.14125	1.48367	0.417075	0.151181	0.751904	0.679171	0.802621	0.417075	1.014	2.05478	1.86922	1.71616	2.46614	1.45026	-0.103317	0.366358	-0.234365	0.286027	-0.49646	0.751904	1.48367	0.104263	0.180794	0.180794	-0.157833	0.570139	-0.157833	-0.234365	-0.288881	0.413276	-0.758556	0.493607	0.23531	0.573938	0.624655	0.751904	-0.369212	-0.103317	-0.627508	-0.627508	-0.234365
		60	0.43402	0.550674	0.762053	-0.174237	0.43402	0.808971	1.25366	0.881767	-0.432533	0.409031	1.11201	0.267387	0.0840601	0.267387	1.22867	1.3953	1.98163	1.04228	3.17621	1.53388	0.242398	-0.221155	-0.224216	0.500694	-0.107563	0.0621317	1.11507	0.128806	0.831788	0.365174	0.245459	1.09008	0.828726	-0.34087	0.128806	0.642338	-0.224216	0.153795	0.0121522	1.2984	0.270449	0.762053	-0.31588	-0.69083	-0.107563	-0.457523	-0.807483
		61	0.203079	0.735062	1.1009	-0.250713	0.618408	0.2159	1.12655	0.805291	-0.146881	0.021057	0.931704	0.13771	-0.458378	0.345375	1.15219	1.11373	1.70005	0.968369	2.63634	1.40934	0.578682	0.11513	0.00823579	0.578682	0.955548	0.193319	0.727101	0.568922	1.2719	0.805291	1.20474	1.5834	1.99567	-0.00458537	0.46509	0.773525	0.00823579	0.335615	0.244604	1.42702	0.452269	0.685576	-0.0302277	-0.250713	0.021057	-0.328903	-0.782696
		62	0.478057	0.785705	0.906208	0.0242645	0.893386	0.715213	1.15618	0.140918	-0.320573	0.296035	1.18568	1.31003	0.265269	0.620353	1.6305	0.470359	0.587013	0.794677	1.5023	2.80599	1.07799	-0.303903	1.18055	1.07799	1.00619	0.447292	-0.161607	0.374225	0.607532	0.140918	0.785705	0.694694	1.3523	-0.178277	-0.178277	1.0485	0.058879	-0.0834168	0.274242	0.538314	0.706241	1.16388	0.69342	0.248599	0.0717002	-0.502595	-0.507718
		63	0.532569	0.942676	0.515398	0.647849	1.05745	0.762628	1.1894	0.538293	0.412568	0.555464	0.88313	0.795467	0.560186	-0.00376313	0.882629	0.0724525	-0.0371034	0.170561	0.84979	3.04413	1.09702	0.538794	1.44708	0.877907	0.827396	1.08507	-0.107095	1.08607	0.976517	0.866961	0.28534	0.515899	0.81645	-0.342877	0.095347	0.636402	0.106294	-0.233822	0.00718339	-0.107095	0.986962	1.43041	0.981239	0.324404	-0.326207	-0.550541	-0.424816
		64	0.495139	0.687368	0.561375	0.714251	0.209791	0.631577	1.04814	0.999599	0.177685	0.735911	1.64572	1.76572	0.834252	0.363923	0.949031	-0.370095	-0.282199	-0.677102	0.209791	2.18625	2.05706	0.116672	1.52369	0.653237	0.468256	0.548904	-0.1241	1.54738	1.04292	1.13081	-0.562324	-0.1241	-0.238879	-0.370095	-0.129323	0.495139	-0.014544	-0.364872	-0.311106	0.0733521	0.461008	1.29936	0.351452	-0.00409823	0.0516922	-0.567547	-0.535441
		65	0.248567	0.665131	1.13206	0.740098	0.235638	0.29688	0.713444	1.02545	0.788411	0.625548	1.08669	0.485602	0.00280149	0.38977	0.710503	0.376841	0.192318	0.478462	0.371848	1.49905	2.81204	0.639273	1.46946	0.999588	0.990857	0.534711	0.80713	1.70944	1.47739	1.29287	-0.584561	0.398501	0.508057	0.78547	0.208984	0.929615	0.644267	-0.11469	-0.645803	0.187325	-0.370443	0.379783	-0.207579	-0.202586	0.710503	-0.0930298	-0.509594
		66	0.12787	0.225394	1.14018	0.400289	0.305167	-0.0333002	0.963571	0.995048	0.738756	0.366409	1.55593	0.983726	0.990934	0.697668	1.40848	0.475256	0.500216	0.686432	-0.158188	0.81132	3.24277	0.779844	1.4198	1.24971	1.66958	1.01358	1.38592	1.23118	0.70899	0.933805	-0.466889	-0.0219784	0.377731	0.68403	-0.430607	0.70899	0.513941	0.202837	-0.528132	0.166555	-0.600696	-0.269437	-0.0284945	-0.0945426	0.70899	-0.0945426	0.00778765
		67	-0.271588	-0.00246146	0.530341	0.000830918	0.116086	0.318275	1.11769	1.12332	0.905804	-0.0201234	0.933167	-0.192615	0.40695	0.654339	1.19355	0.457777	-0.0837687	1.23546	-0.162742	0.793841	3.16066	1.15727	1.95591	1.61422	1.81078	1.19355	1.38137	0.436823	0.494059	0.336895	-0.471443	-0.211059	0.18865	0.482024	-0.435161	0.125005	0.509387	0.369885	0.402875	0.51813	0.330311	0.266665	0.717985	0.0854305	0.678586	-0.283624	0.0161587
		68	-0.361903	-0.0927759	-0.191841	-0.361903	-0.246647	0.277141	1.44734	1.13137	0.77764	-0.246647	0.892033	0.224059	1.00901	1.21855	0.607578	0.378793	-0.261113	0.562457	-0.290906	0.764037	2.77141	1.63445	1.70286	1.4482	2.28796	1.34914	1.07915	0.679437	0.649644	0.950288	-0.00558931	-0.846212	-0.0757234	0.1798	0.265262	-0.460968	-0.261975	0.37793	0.732519	0.662385	0.561595	1.1033	1.04763	0.464255	0.0926135	-0.646357	0.394983
		69	0.371937	0.243878	0.24474	-0.373733	-0.55826	0.116681	0.984573	1.16824	0.117543	-0.806817	0.180711	-0.187481	-0.00209191	1.1068	-0.00381653	0.366962	-0.372871	0.30207	-0.251511	0.303795	2.15749	2.16591	2.28555	1.7311	2.22238	1.23485	0.367824	0.616381	0.489184	0.490047	-0.0661214	-0.806817	-0.187481	0.367824	0.304657	-0.621427	-0.125176	0.117543	0.671987	0.550627	0.549765	1.04277	0.736016	0.303795	1.42349	-0.806817	-0.0652591
		70	0.446035	-0.0510781	0.134311	-0.299635	-0.299635	-0.362802	0.50509	0.319701	-0.177413	-0.548191	-0.114245	0.071144	0.256533	0.627312	-0.114245	0.256533	-0.114245	-0.177413	-0.177413	0.193366	1.12443	4.82719	3.00739	1.43615	1.55837	2.51028	0.441923	0.690479	0.378756	0.564145	0.00797679	-0.548191	0.071144	0.441923	0.378756	-0.362802	-0.0510781	-0.177413	0.00797679	0.071144	-0.114245	0.378756	0.256533	0.193366	1.12854	-0.548191	0.193366
		71	0.638931	0.141818	0.141818	-0.106739	-0.106739	-0.355295	0.141818	0.141818	-0.355295	-0.355295	-0.106739	-0.106739	-0.106739	-0.106739	-0.106739	-0.106739	-0.106739	-0.355295	-0.355295	-0.355295	0.390374	5.61657	2.27334	0.887488	0.638931	1.77622	-0.106739	0.141818	-0.355295	-0.355295	-0.355295	1.35353	-0.106739	-0.106739	-0.355295	1.35353	0.141818	-0.355295	-0.355295	1.60208	-0.106739	-0.355295	-0.106739	-0.355295	1.13604	-0.355295	-0.355295
		72	-0.343718	0.310528	0.0924461	-0.343718	0.310528	0.0924461	-0.343718	0.0924461	-0.125636	0.0924461	0.746692	0.310528	0.52861	0.0924461	0.0924461	-0.125636	-0.125636	0.310528	0.0924461	0.310528	0.52861	4.79105	2.56871	0.746692	1.18286	1.4783	0.0924461	-0.343718	-0.343718	0.0924461	-0.125636	1.58318	-0.343718	0.0924461	-0.125636	2.01935	-0.343718	-0.343718	-0.343718	1.80127	-0.125636	-0.343718	-0.343718	0.0924461	-0.125636	-0.343718	-0.343718
		73	-0.315906	0.563892	0.796916	-0.315906	0.563892	0.34581	-0.0903533	0.796916	0.127729	1.02247	0.774503	0.563892	1.23308	0.571363	0.571363	0.127729	-0.0978243	0.789445	0.796916	0.789445	0.781974	2.94937	2.33843	1.22561	0.985114	0.796916	1.02247	-0.0903533	-0.315906	0.34581	0.127729	1.611	-0.541459	0.34581	0.353281	1.82161	-0.541459	-0.541459	-0.541459	1.60353	-0.323377	-0.315906	-0.315906	-0.105295	-0.0978243	-0.541459	-0.541459
		74	0.0735295	0.953328	0.86009	0.0735295	0.496562	0.604741	0.23383	0.794838	0.190903	1.02039	0.968182	0.627066	1.42676	0.634537	1.02605	0.12565	0.0958545	1.04838	1.44736	1.17888	1.30191	1.76049	3.44564	2.00656	1.83132	1.38211	1.47716	0.494839	0.00827723	1.19201	0.843426	0.356864	-0.152023	0.474237	0.742717	0.175961	-0.282528	-0.608789	-0.34778	-0.107373	0.0660586	-0.122227	-0.252732	0.349393	0.161107	-0.413032	-0.282528
		75	0.256424	0.718756	0.370042	0.0196451	0.025211	0.351473	0.653504	0.778348	-0.0810636	0.530343	0.297447	-0.0810636	1.21088	0.144489	0.772782	0.0904633	0.0606674	0.577025	1.43087	1.18109	1.32282	1.99948	3.28586	2.04616	1.67153	1.36562	0.987109	0.914513	0.191172	0.701964	0.571459	0.0848974	0.267651	-0.0158113	0.70753	-0.29539	-0.0996331	-0.425895	-0.401665	-0.597422	0.267651	-0.176112	-0.306616	-0.140655	-0.11086	-0.230138	-0.0996331
		76	1.03815	0.508468	-0.291352	0.226524	-0.185078	0.141184	0.63483	-0.0746611	0.475107	-0.548219	0.504326	0.475107	0.741105	0.283493	0.720171	-0.119825	0.650776	0.141184	0.769477	0.936862	1.68738	1.68738	3.13143	2.18516	1.72074	0.895839	-0.0914534	0.704225	-0.176794	0.108445	0.552786	0.483391	0.891697	-0.034485	-0.111541	0.137042	0.907644	-0.376693	-0.160848	-0.548219	0.125238	-0.352463	-0.291352	0.100162	0.0960196	-0.372551	-0.0504311
		77	0.720897	0.191217	-0.106493	0.0851217	-0.221411	-0.221411	0.382831	0.17545	0.484118	-0.649805	0.55868	0.308269	0.971308	0.292503	0.689364	0.306135	1.05683	0.657832	0.191217	0.619611	1.76717	1.76717	2.09641	2.70734	1.65011	0.910377	-0.12226	0.718762	-0.0770953	-0.313874	0.436819	0.804282	0.574446	0.26097	-0.252944	-0.0297963	0.3692	-0.413026	-0.45819	-0.825654	-0.192013	0.053589	-0.106493	-0.106493	-0.0907269	-0.78049	-0.061329
		78	0.634136	-0.132324	0.603302	0.794916	0.251604	-0.308172	0.0592914	-0.14809	0.634136	-0.499787	0.23514	0.458288	0.410989	0.442521	1.16238	0.77915	2.08962	0.571071	0.427453	0.619068	0.970067	1.52984	1.38553	3.91257	0.379456	1.14661	0.587535	0.395222	-0.163856	0.955697	1.14661	0.954301	0.250906	0.410989	-0.339705	-0.116557	0.282439	-0.499787	-0.308172	-0.115859	-0.515553	0.203607	0.043525	0.043525	0.0592914	-0.867251	-0.14809
		79	-0.334874	-0.0187893	0.400751	0.716836	0.365139	-0.35268	-0.0187893	-0.159026	-0.334874	-0.510723	0.315102	-0.35268	0.174865	-0.176832	0.892684	0.892684	2.10244	0.526563	0.224902	0.224902	0.192671	0.752448	0.382945	4.87364	1.15873	1.22658	0.734642	0.350714	0.332908	1.6105	1.38462	0.36852	-0.0187893	0.0168228	-0.159026	-0.510723	-0.370486	-0.510723	-0.35268	-0.126795	-0.0187893	0.350714	0.315102	0.157059	0.139253	0.103641	1.57944
		80	-0.425869	-0.109784	0.133908	0.449993	0.449993	-0.267826	-0.109784	-0.425869	-0.425869	-0.425869	0.0482589	-0.267826	-0.267826	-0.267826	0.449993	0.449993	1.4839	-0.267826	0.133908	0.133908	-0.425869	0.133908	0.29195	3.55171	2.55281	0.608035	1.38619	0.826409	-0.109784	1.16781	1.86031	-0.425869	-0.109784	-0.425869	0.668366	-0.425869	-0.109784	-0.425869	-0.267826	0.133908	-0.109784	-0.267826	0.0482589	-0.109784	0.0482589	0.364344	1.3126
		81	-0.338404	-0.32643	-0.0342931	-0.174374	-0.0223187	-0.332417	-0.0223187	-0.186348	0.117762	-0.338404	0.439835	-0.0283059	-0.0283059	0.123749	0.281792	0.585903	1.21209	0.275805	0.269818	-0.186348	-0.490459	-0.338404	-0.332417	1.55212	3.55261	0.743945	0.457707	0.457707	0.129737	0.135724	1.54006	-0.490459	-0.0223187	-0.186348	0.755831	-0.338404	-0.174374	0.573928	-0.332417	-0.338404	-0.174374	-0.180361	0.135724	0.281792	0.439835	0.907975	1.55212
		82	-0.203346	-0.507456	0.100765	-0.355401	-0.203346	-0.355401	-0.203346	-0.0512901	1.40052	-0.203346	0.100765	-0.0512901	-0.0512901	0.100765	0.100765	0.404876	0.556931	0.252821	0.404876	-0.0512901	-0.355401	-0.203346	-0.355401	-0.0512901	5.19286	0.404876	1.58243	1.58243	-0.0512901	-0.203346	2.19065	-0.355401	-0.203346	-0.0512901	0.890889	-0.203346	-0.355401	0.708987	-0.355401	-0.203346	-0.355401	0.944358	-0.203346	0.100765	0.100765	0.252821	-0.0512901
		83	0.207163	-0.563398	0.0448233	0.0551074	0.207163	0.0551074	-0.259287	0.825668	2.27748	0.673613	1.44417	0.825668	0.359218	0.511274	0.511274	0.815384	0.500989	0.196879	0.815384	-0.107232	-0.411343	-0.259287	-0.411343	-0.107232	4.81425	0.348934	0.43225	0.43225	0.825668	-0.259287	1.04047	-0.411343	-0.259287	-0.107232	0.673613	0.207163	-0.411343	0.653045	-0.411343	-0.259287	-0.411343	0.888416	-0.259287	0.0448233	0.0448233	0.196879	-0.107232
		84	0.162998	-0.303452	-0.303452	0.162998	0.162998	0.162998	-0.303452	0.629448	1.77715	0.629448	1.0959	0.629448	0.162998	0.162998	0.162998	0.162998	-0.303452	-0.303452	0.162998	-0.303452	-0.303452	-0.303452	-0.303452	-0.303452	5.26746	-0.303452	2.25396	0.844251	0.629448	-0.303452	0.844251	-0.303452	-0.303452	-0.303452	0.629448	0.162998	-0.303452	-0.303452	-0.303452	-0.303452	1.10625	0.844251	1.10625	-0.303452	-0.303452	-0.303452	-0.303452
		85	0.543316	-0.129567	-0.129567	0.13045	0.956181	0.543316	-0.129567	1.2162	1.42263	0.390468	1.47622	0.596901	0.13045	0.336883	0.956181	0.336883	0.283298	0.696163	0.749748	-0.129567	0.0768655	0.0768655	-0.129567	0.0768655	3.5588	0.696163	2.3123	-0.129567	0.803333	0.0768655	-0.336	0.0768655	-0.336	-0.336	1.00977	0.543316	0.0768655	-0.129567	0.283298	0.283298	1.28014	0.0768655	0.867273	-0.336	-0.336	-0.336	-0.336
		86	0.139866	-0.0665668	-0.0665668	-0.273	1.70043	0.139866	-0.0665668	0.346298	0.552731	-0.479432	0.139866	-0.273	-0.273	-0.0665668	0.552731	-0.0665668	0.346298	1.90687	0.346298	-0.0665668	0.139866	0.139866	-0.0665668	0.139866	1.756	1.90687	4.67071	-0.0665668	-0.0665668	0.139866	-0.273	0.139866	-0.273	-0.273	0.139866	0.139866	0.139866	-0.0665668	0.346298	0.346298	1.34314	0.139866	0.930273	-0.273	-0.273	-0.273	-0.273
		87	0.580135	-0.281074	0.373702	-0.0509892	1.70419	0.143617	0.373702	0.35005	0.993	-0.257422	0.798394	-0.269248	-0.487507	0.155443	0.338224	0.155443	0.786568	2.56539	0.35005	0.155443	0.143617	0.361876	0.373702	0.580135	0.568309	2.56539	3.91953	1.02848	0.373702	0.580135	0.385528	1.01665	0.385528	0.16727	1.01665	0.143617	0.143617	0.591961	0.568309	0.35005	0.373702	0.143617	-0.475681	-0.269248	0.822046	-0.487507	-0.269248
		88	0.211569	-0.443208	0.211569	-0.00669007	0.922754	-0.224949	0.211569	-0.224949	0.211569	-0.00669007	0.429827	-0.224949	-0.443208	-0.00669007	-0.443208	-0.00669007	0.211569	1.57753	-0.224949	-0.00669007	-0.224949	-0.00669007	0.211569	0.211569	-0.00669007	1.57753	2.72523	2.57517	0.211569	0.211569	0.429827	0.648086	0.429827	0.211569	0.648086	-0.224949	-0.224949	0.429827	-0.00669007	-0.224949	0.211569	-0.224949	-0.224949	-0.224949	0.866345	-0.443208	-0.224949
		89	0.258801	-0.0248692	0.258801	0.411648	0.0696874	0.688198	0.629907	0.0696874	0.382503	0.040542	0.353357	0.19339	-0.272273	0.782755	-0.0248692	0.411648	0.753609	0.724464	0.317092	0.411648	0.0696874	0.287946	0.506205	0.629907	0.040542	0.477059	1.34297	3.98312	1.24842	0.877311	0.971868	1.06642	0.971868	0.382503	1.06642	-0.177717	-0.177717	0.724464	0.287946	0.19339	0.629907	-0.0540147	-0.301419	0.317092	0.789875	-0.64338	-0.177717
		90	0.212534	0.58364	0.789444	0.295186	0.171484	0.934222	0.439413	0.315711	-0.384901	-0.508603	-0.199623	0.295186	0.480464	0.23361	0.150958	0.439413	-0.0137942	-0.261198	0.27466	0.150958	0.315711	0.315711	0.459938	0.150958	-0.364375	0.212534	1.3669	3.28208	1.92329	0.686817	0.85157	1.16055	1.14002	0.192009	0.150958	-0.508603	-0.220148	-0.116971	0.0272563	0.150958	0.295186	0.336236	-0.199623	0.707343	0.377287	-0.756007	-0.364375
		91	0.127279	1.38589	2.03544	0.653682	0.52998	1.29272	0.354158	0.230456	-0.470155	-0.593858	0.158873	0.209931	0.395209	0.148355	0.509454	0.797909	0.344702	-0.346453	0.189406	0.0657035	0.230456	0.230456	0.374683	0.0657035	-0.44963	0.127279	1.7254	2.3755	4.05679	0.601562	0.766315	1.07529	1.49852	0.106754	0.509454	0.293644	-0.305403	-0.202226	-0.0579987	0.509454	0.209931	0.250981	0.158873	0.622088	0.735783	-0.841262	-0.44963
		92	0.401673	0.645749	2.09536	0.235256	0.664207	0.701196	0.150208	0.471921	-0.533939	-0.212226	0.449731	-0.315732	0.224187	-0.855652	-0.0162088	1.02291	-0.304664	-0.533939	-0.45996	-0.245485	0.686396	0.364683	0.50891	-0.138247	-0.067999	0.0799599	1.67007	1.82536	3.98499	0.471921	0.00971199	0.764107	0.741918	-0.0642674	0.0910288	0.0318499	-0.352722	-0.282474	-0.245485	0.412742	-0.42297	0.616148	0.235256	0.830623	0.704928	-0.748415	-0.49695
		93	-0.0950677	0.149008	1.02171	0.0269704	0.455921	0.608101	-0.202305	0.119408	-0.309543	0.0121699	0.500864	-0.524018	-0.416781	-0.371838	-0.0802672	0.670396	-0.0802672	-0.309543	-0.524018	0.209293	0.333883	0.271588	0.271588	0.575949	0.0121699	0.361473	1.66313	1.32862	4.0642	0.119408	-0.11242	-0.309543	0.590749	-0.157363	0.286388	0.515664	-0.157363	-0.202305	0.728129	0.867519	0.665834	1.4165	0.805224	1.11214	0.438569	-0.524018	-0.416781
		94	-0.323338	-0.829123	-0.400172	-0.50741	-0.0784592	0.0737212	0.532914	0.579344	-0.124889	-0.0784592	-0.171158	-0.752289	-0.232127	0.22574	-0.477006	0.961865	0.0735597	0.425676	-0.201723	0.531588	0.793819	0.456242	0.869166	0.898244	0.609748	0.82141	1.95459	0.901057	2.85595	0.579344	0.760441	0.288035	0.331652	-0.247992	0.164933	-0.462467	0.164933	-0.0176516	1.32571	0.746063	0.988129	1.18823	0.408486	1.29679	0.317113	-0.201723	-0.0944855
		95	0.00955167	0.147193	-0.653625	-0.653625	-0.653625	0.406611	0.439163	0.697759	-0.111403	-0.386686	-0.264909	-0.791267	0.155537	0.560939	-0.249044	0.172223	0.301521	0.439163	-0.240701	0.545075	0.430819	0.148015	0.827879	1.07143	0.034582	1.20907	1.7513	0.430819	3.61317	0.697759	1.62952	0.301521	0.666851	-0.127268	0.819535	-0.127268	0.552596	0.956355	1.60613	0.812014	1.05639	0.772763	0.26227	0.666851	0.545075	-0.240701	-0.240701
		96	-0.0142852	0.317619	-0.677462	-0.677462	-0.677462	0.123356	0.415326	0.868184	0.447548	0.366527	-0.548164	-0.426578	0.520225	0.277685	-0.272881	0.148387	0.471947	0.803851	-0.264538	0.196664	0.795508	0.0590228	0.544624	0.463604	0.0107452	0.795508	1.72625	1.3783	2.87503	2.03376	1.47537	1.44326	0.64181	0.172265	0.730543	-0.0219976	0.657866	1.12678	0.738886	0.463604	0.512512	-0.353901	0.042967	0.253285	0.390927	0.901037	0.512512
		97	0.436121	1.72677	-0.638794	0.457593	-0.0906007	0.710218	0.176339	0.90448	0.759126	0.679292	0.176339	-0.250269	0.283609	-0.371855	0.176339	-0.638794	-0.177592	0.0166701	-0.638794	-0.177592	0.283609	-0.177592	-0.104916	0.0893469	-0.638794	0.557706	1.76136	1.68869	2.08667	3.16644	1.64694	1.34191	0.405195	0.759126	0.90448	0.564864	0.283609	0.890165	0.363444	0.911637	0.412353	0.0965044	0.492187	0.564864	1.11306	0.526781	0.412353
		98	-0.536521	0.754129	-0.49801	0.442074	-0.10612	-0.10612	-0.262424	0.0881424	0.94558	0.396833	-0.262424	0.0468198	0.359428	-0.0290967	0.519097	-0.49801	-0.303747	0.203124	-0.185401	-0.147443	0.203124	-0.460051	-0.654314	-0.147443	-0.185401	0.477221	1.10133	1.76451	0.515179	3.44423	0.986903	1.52837	0.591649	0.789276	0.400751	0.907622	0.0468198	-0.460051	0.126654	0.674848	0.553137	-0.0296502	0.632972	0.595013	0.986903	0.667566	1.17835
		99	-0.298546	0.507384	-0.260035	0.680049	0.131855	0.131855	0.266007	-0.158602	0.310311	0.148215	0.266007	-0.10373	-0.0815786	0.208878	0.466615	-0.550491	-0.260035	0.633488	0.343031	0.186727	0.052574	-0.706796	-0.416339	0.477183	-0.237883	0.617128	0.852713	1.32163	-0.12009	3.19374	1.70772	1.18168	0.633488	1.02538	1.31583	0.757072	-0.10373	-0.706796	0.460823	1.29947	0.594976	-0.276395	0.578616	0.73492	1.12681	-0.550491	0.348822
		100	0.507822	-0.431463	0.496017	-0.146909	0.0152982	-0.146909	-0.337171	-0.112951	0.031547	0.143548	-0.0127563	0.1657	0.187851	0.478308	0.187851	0.367767	0.00939536	1.22733	0.774668	0.293949	0.159797	-0.275159	-0.309116	1.23323	0.518168	0.774668	0.948681	1.09318	1.01069	3.11625	1.04297	0.902918	1.06512	1.23323	1.19928	0.96493	0.327907	-0.599573	0.780571	0.90882	0.428102	-0.118854	0.786474	0.293949	0.137645	-0.605476	0.0197413
		101	0.80627	-0.133016	0.481855	-0.00476601	0.157441	-0.00476601	-0.0387234	0.0291914	-0.295223	0.876349	0.285691	-0.00476601	-0.295223	-0.00476601	-0.295223	0.353606	-0.00476601	0.900562	0.447898	0.123484	-0.166973	-0.133016	-0.166973	1.06277	0.191399	1.62921	0.934519	1.20076	1.43089	2.16426	2.80079	0.576148	1.32901	2.24409	2.80079	0.481855	0.7481	-0.45743	0.610105	0.738355	0.413941	-0.133016	0.772312	0.123484	0.123484	-0.619637	-0.619637
		102	0.594348	-0.0544801	0.533475	0.0468535	0.209061	-0.216687	-0.01402	0.107727	0.573935	0.373971	0.0468535	-0.216687	-0.216687	-0.216687	-0.216687	0.695682	0.310394	0.371268	0.472601	-0.115354	0.411728	-0.0544801	0.148187	0.269934	0.533475	1.39038	0.695682	1.22547	2.0365	1.34451	3.0352	1.10102	1.85388	1.97833	2.50812	0.269934	0.536178	0.675269	0.898349	0.999683	0.675269	0.209061	0.533475	-0.378894	0.411728	-0.541101	-0.277561
		103	-0.179366	-0.447501	0.620446	1.42485	0.352311	0.356905	0.883987	-0.447501	0.611256	0.411293	0.084175	-0.447501	-0.447501	-0.447501	-0.179366	-0.18396	0.0795803	-0.18396	0.347716	0.352311	0.611256	0.356905	0.347716	-0.179366	-0.18396	0.997356	0.084175	1.20651	0.938374	0.888582	4.51913	1.13834	2.26527	1.2609	2.38323	0.0887698	0.143157	1.14293	0.343121	0.606662	1.41107	-0.18396	-0.18396	-0.447501	0.343121	-0.447501	-0.18396
		104	-0.112422	-0.569557	0.876388	1.68079	0.230255	1.17984	1.70693	0.186439	0.6782	-0.301421	0.151118	-0.380558	-0.191559	-0.380558	0.265575	0.0719817	0.146523	-0.117017	0.414659	0.419254	0.6782	0.23485	0.22566	-0.301421	-0.117017	0.44998	0.340117	0.682795	0.414659	1.14452	3.38109	2.90627	1.93055	0.524521	0.6782	0.155713	-0.00256006	1.39887	0.788062	1.4296	2.801	0.260981	0.0719817	-0.380558	0.410064	-0.00256006	0.827977
		105	0.122911	0.169834	0.596152	1.65259	0.202047	1.41518	1.91924	0.673801	0.37494	-0.0660881	0.122911	-0.397253	0.0437743	0.106804	1.00497	0.0437743	-0.145225	-0.145225	-0.129118	0.643075	0.626968	0.218154	0.437969	-0.0660881	-0.145225	1.68192	0.815967	0.895104	0.37494	1.62037	2.29872	3.33607	1.35224	0.988859	0.37494	0.139018	0.736831	0.580045	0.484802	0.610771	1.98217	0.232773	0.0437743	-0.397253	0.106804	-0.0192555	0.547741
		106	0.631817	0.946876	0.319822	0.820816	-0.0551117	0.7654	1.39394	0.952913	0.385916	-0.179594	0.25837	-0.242624	0.198404	0.510398	1.14043	0.322886	0.133887	0.507335	-0.118142	0.634881	1.38484	0.439755	0.946876	0.193853	0.133887	2.33448	0.702461	0.38898	0.261433	0.951426	1.07433	4.21843	1.32487	1.89038	1.13281	0.255306	1.51387	0.198404	0.888396	0.640918	1.3324	0.511885	0.198404	0.00634101	0.510398	-0.113591	0.453406
		107	0.469604	0.973661	0.595872	0.469604	-0.0283262	-0.152809	0.475731	0.537334	0.223703	-0.152809	0.0961563	-0.404837	-0.152809	1.28908	0.913845	-0.0283262	0.285305	0.658752	0.033276	0.786299	1.84989	1.0938	0.973661	0.53427	0.285305	1.60527	0.351249	0.226766	0.412851	1.22748	0.972383	3.60975	1.28729	1.6638	0.970598	0.406724	1.28729	0.160822	1.28908	0.977233	0.788084	0.598936	0.788084	1.09865	0.975447	-0.0265405	-0.653803
		108	0.510136	0.307407	0.685704	0.510136	0.113571	-0.416371	-0.291888	0.123108	0.113571	-0.517735	-0.167406	-0.6191	-0.315006	0.874852	0.45032	0.417666	0.629932	1.10474	0.731297	0.878897	1.18363	1.48773	0.307407	0.372073	0.224473	0.284289	-0.0109114	-0.338124	0.30272	1.16941	1.01292	3.15176	1.73605	1.04961	1.36729	1.00338	1.0265	0.606814	1.68577	1.52459	1.23408	1.34902	0.929982	1.79667	1.06805	-0.0380736	-0.7667
		109	-0.0830383	-0.285768	0.203574	0.123842	0.570006	0.164547	-0.111293	0.579543	0.432086	-0.488498	0.095587	-0.314023	-0.0788881	1.13784	0.437473	0.322421	0.879487	1.25669	0.773972	0.396767	0.686294	0.921428	0.0590318	0.0278631	0.405068	-0.0464832	0.156246	-0.0464832	0.814677	1.29448	1.30278	3.15057	1.90144	0.883637	1.00787	0.879487	0.709162	0.842932	1.46604	2.09207	1.26331	1.66754	1.02818	1.85278	1.0552	0.171169	-0.488498
		110	0.326681	-0.28406	-0.0139689	0.53356	0.571714	0.574266	-0.109585	0.675631	0.433794	-0.486789	0.0972952	-0.312314	-0.0771798	0.606671	0.12555	0.73214	0.567564	0.944769	0.462049	0.0848444	0.0607401	0.703885	0.468751	-0.28406	0.501156	0.771246	0.565965	-0.044775	0.502754	1.07694	1.90126	2.30577	3.22156	0.979725	1.41759	1.7916	1.21326	1.75504	0.934869	1.65528	0.73214	1.44999	0.497005	1.41599	0.837655	-0.454384	-0.0787786
		111	0.550722	0.0949612	0.317302	0.805352	0.885392	1.05465	0.370801	0.911401	0.31772	0.142711	0.577681	0.275301	0.206341	0.842441	0.254091	0.455222	0.439761	0.715601	0.137381	0.0525418	0.34426	0.778812	0.943272	0.333712	0.731061	1.0489	0.688642	0.328382	0.911933	1.03877	2.55506	1.46841	3.05857	1.43665	1.46319	1.85479	1.33007	1.38262	0.789473	0.990491	0.502972	0.868981	0.667432	1.47332	0.948603	-0.30825	0.21647
		112	0.305529	0.827845	0.210028	0.353279	0.0885188	0.257778	0.501819	0.440553	-0.0152076	0.223544	-0.150232	-0.245733	0.0802928	0.440553	-0.197983	0.86208	-0.150232	-0.150232	-0.245733	-0.0547319	-0.245733	0.90983	0.679305	0.414545	0.210028	1.31784	0.95758	0.271294	0.184019	1.42686	2.20335	0.257778	3.68494	0.63978	1.06131	1.59083	1.13507	0.930549	0.870305	0.331537	0.257778	0.536054	0.679305	2.25639	0.822555	0.493593	0.623328
		113	-0.0741532	0.856174	-0.169654	-0.166697	0.397435	-0.262197	0.670442	0.622047	0.0131213	0.111579	-0.121903	-0.357698	0.389209	0.0608715	0.391522	0.903279	0.158684	0.0183904	-0.0771101	0.534772	-0.217404	0.530148	0.439917	1.00405	-0.309947	0.530148	1.13907	0.439917	0.63323	1.60835	1.98971	0.860153	3.20358	1.10186	1.80398	1.09659	0.487667	0.0154335	0.630917	-0.456155	0.298978	0.717547	0.439917	2.17017	1.14434	0.521922	0.103353
		114	-0.338709	0.737413	-0.5348	-0.282912	-0.156167	-0.184867	0.453636	0.842628	0.183407	0.0431136	-0.142618	-0.0868212	0.56204	-0.0126835	0.124421	0.832269	0.137969	-0.296461	-0.198415	0.418557	-0.0445728	0.607479	0.225656	0.450446	-0.0868212	0.411388	1.07061	0.225656	0.474354	1.39663	1.98172	1.03553	3.00204	1.48351	1.59989	0.982922	0.911974	-0.156167	0.617838	0.151518	0.180218	0.940674	0.225656	2.35318	1.08097	0.541322	0.271094
		115	-0.33958	0.0724743	-0.378667	-0.126779	0.156971	0.128271	0.114723	0.515731	0.484529	-0.126779	0.0135152	0.0693123	0.863162	0.131433	0.437559	0.65036	0.765116	0.330686	-0.0422818	1.0457	0.111561	0.268565	0.212768	0.594563	0.383321	0.229479	1.0457	0.212768	0.473483	1.35971	1.79981	1.66268	2.31307	2.26766	2.68604	1.12704	1.3701	0.313976	1.70398	0.93567	0.493356	1.5558	0.212768	2.30424	1.53909	-0.437626	-0.381829
		116	0.340393	1.00442	-0.454612	0.189543	0.304384	0.444593	0.150457	0.63453	0.408584	0.189543	0.189543	0.637607	1.26255	0.811407	-0.199562	0.909452	1.1645	0.870366	0.749371	1.41647	0.539561	0.19262	0.752448	0.209416	1.45556	0.657479	0.660556	-0.00347081	0.228629	0.722593	0.741806	0.856647	1.36675	1.8539	2.99958	0.601597	2.16175	0.713361	2.24366	1.86762	0.248502	0.918684	0.248502	1.7788	1.01365	-0.261598	-0.31748
		117	0.0782159	1.28763	0.122731	0.803656	0.783681	0.746185	-0.111721	0.0782159	-0.0496846	-0.268725	0.58918	0.626677	1.77862	1.40713	-0.149217	0.549229	0.706234	0.92071	0.916146	0.958207	-0.0167525	-0.363694	0.392225	0.0452837	0.801202	0.511733	0.202288	-0.363694	-0.42573	0.478801	0.651216	1.06019	1.3742	1.25469	3.10508	1.54662	1.97312	0.549229	1.49126	1.11521	-0.111721	0.264324	-0.111721	0.830306	0.359293	-0.42573	-0.677703
		118	0.706429	1.04843	0.0405375	0.721463	0.433803	0.396306	-0.350919	0.374388	-0.381531	-0.57228	0.728348	0.987205	1.33609	1.01093	-0.388415	0.485068	0.485068	0.588864	0.833952	0.51568	0.0117345	-0.602892	0.263707	-0.129558	0.405	0.447572	0.202483	-0.16017	-0.461599	-0.167054	0.476375	0.728348	1.28175	0.876524	2.98434	2.58926	2.59107	0.817109	0.374388	0.51568	-0.461599	-0.381531	-0.240238	0.202483	-0.240238	-0.57228	-0.824252
		119	0.113879	0.203906	0.203906	0.632858	0.0932253	0.307702	0.0465898	0.267951	0.267951	-0.660884	0.639743	0.646627	0.743539	0.418382	-0.225047	-0.107482	-0.107482	-0.00368621	-0.0105707	-0.328843	-0.328843	-0.439523	-0.328843	-0.218163	0.0465898	0.106994	1.08611	0.00319827	-0.550204	-0.00368621	0.639743	0.639743	1.19314	0.535947	2.12198	3.47288	4.66323	0.224559	-0.218163	-0.328843	-0.550204	0.267951	-0.328843	0.113879	-0.328843	-0.660884	-0.660884
		120	0.242967	-0.310435	-0.310435	-0.310435	-0.421115	-0.421115	0.175679	0.397039	0.397039	-0.531795	-0.0890738	0.132287	-0.199754	-0.310435	-0.310435	0.0216066	0.0216066	-0.0890738	-0.310435	-0.199754	-0.199754	-0.310435	-0.199754	-0.0890738	0.175679	0.0216066	1.80666	0.132287	0.170355	0.502396	-0.0890738	-0.0890738	0.464328	0.0216066	1.39316	2.10064	6.30029	0.945118	1.09387	1.57466	-0.421115	0.98851	-0.199754	0.242967	-0.199754	-0.531795	-0.531795
		121	-0.0101937	-0.0101937	0.18742	-0.405421	0.18742	-0.405421	0.0806923	0.673533	0.673533	-0.405421	-0.405421	-0.207807	-0.207807	-0.405421	-0.405421	-0.405421	-0.405421	0.385033	0.18742	0.780261	-0.0101937	0.780261	-0.0101937	0.18742	0.278306	-0.207807	1.15828	-0.207807	0.581276	0.581276	0.18742	0.582647	0.385033	0.385033	0.871147	0.764419	6.26043	1.56934	1.76559	1.5666	0.385033	0.869776	-0.0101937	-0.207807	-0.405421	-0.207807	-0.207807
		122	-0.471926	-0.315588	0.0383628	-0.867153	0.1947	-0.39814	-0.39814	0.351038	0.663713	-0.0854651	-0.39814	-0.200527	-0.0441891	-0.39814	-0.39814	-0.39814	-0.241803	0.0796387	0.0383628	0.474866	0.153424	1.25655	-0.315588	0.820051	-0.513202	-0.0441891	0.349667	-0.513202	0.901232	0.275882	0.976389	0.589928	0.704989	0.861327	0.861327	0.268486	4.60174	2.35831	2.24188	1.73022	0.704989	0.234606	0.153424	-0.0441891	-0.39814	-0.513202	-0.356864
		123	-0.584351	-0.428013	-0.0740623	-0.156748	0.905106	0.312265	-0.236288	0.238613	0.551288	0.0763868	-0.236288	-0.312952	-0.156614	-0.510565	-0.510565	-0.236288	-0.354228	-0.0327863	-0.0740623	0.362441	0.0409994	1.69268	-0.428013	0.707626	-0.35135	-0.156614	-0.354228	-0.625627	0.197337	-0.428013	0.863964	1.02606	0.866841	1.02318	0.748902	0.156061	3.49482	2.47725	2.3179	0.39194	1.68967	0.353541	1.41238	0.666217	0.0379884	-0.625627	-0.469289
		124	-0.778501	-0.622164	-0.465826	0.0443293	0.513342	0.513342	-0.0352116	-0.153151	0.159524	0.277464	-0.0352116	-0.309489	-0.153151	-0.309489	-0.309489	-0.0352116	-0.153151	-0.622164	-0.465826	-0.622164	-0.153151	0.708078	-0.622164	0.315862	-0.347887	-0.153151	-0.153151	-0.622164	0.00318674	-0.622164	0.4722	0.239065	0.277464	0.433801	0.159524	0.159524	4.70495	1.29503	3.92326	0.395403	1.10029	0.357005	1.21823	0.66968	0.239065	-0.622164	-0.465826
		125	0.0734344	-0.156121	-0.500454	0.781488	0.896265	0.66671	-0.226177	-0.156121	-0.0413432	0.347711	0.00337858	-0.270898	-0.156121	-0.0413432	-0.270898	0.347711	-0.0413432	0.30299	0.647322	0.188212	-0.0413432	0.162878	0.647322	-0.0413432	0.118156	-0.156121	-0.270898	0.30299	0.30299	-0.0413432	0.0734344	0.851543	0.118156	0.118156	0.30299	0.188212	4.06672	1.58493	3.83717	0.162878	1.05576	0.781488	1.44482	0.781488	0.966321	-0.500454	0.0734344
		126	0.580327	0.350772	-0.456678	0.465549	0.580327	0.350772	0.00643887	-0.112346	0.465549	0.580327	-0.227123	-0.227123	-0.112346	0.00243204	-0.227123	0.11721	0.465549	1.273	0.691098	0.695104	0.00243204	-0.341901	1.15421	0.00243204	-0.112346	-0.112346	-0.227123	0.346765	0.346765	0.00243204	0.11721	0.346765	-0.112346	-0.112346	1.273	0.231987	3.20223	2.65834	3.43579	0.121216	1.39178	0.928666	1.04344	0.465549	1.38778	-0.456678	0.11721
		127	0.64098	0.411424	0.16473	0.245824	0.360602	0.411424	0.34747	-0.332071	1.08696	0.360602	-0.16647	-0.446848	-0.332071	0.0630849	0.394286	0.177862	0.80658	2.17479	0.471372	1.03614	-0.217293	-0.000869928	1.49525	-0.217293	0.228685	-0.0516927	-0.446848	0.968174	0.687796	0.623841	0.738618	0.687796	0.509063	-0.0516927	1.61403	1.13377	1.43129	2.99937	2.22561	0.462247	1.45244	0.708941	0.823719	0.526202	2.00919	-0.396026	-0.102516
		128	0.174281	0.711532	0.406233	0.162529	0.162529	0.308594	0.588972	-0.300588	0.735037	0.162529	0.114102	0.236662	-0.434901	-0.288836	0.406233	-0.0202105	0.857597	1.61285	-0.300588	0.588972	-0.569214	-0.14277	0.588972	-0.434901	0.125855	-0.0202105	-0.300588	0.674858	0.260168	0.674858	0.674858	0.663105	0.943483	0.382727	1.58934	1.22386	1.54091	2.11264	2.96772	1.12622	2.0407	1.29721	0.894271	0.577219	1.46678	0.248415	-0.0319632
		129	-0.235769	0.301481	0.459299	-0.247522	0.574985	-0.101457	0.178921	-0.247522	0.324987	-0.247522	0.167169	0.289729	-0.381835	-0.235769	0.459299	0.0328561	0.447547	0.739677	-0.247522	0.178921	-0.516147	-0.0897038	0.178921	-0.381835	0.178921	0.855363	-0.247522	0.727925	0.313234	0.727925	1.55043	0.716172	0.99655	0.435794	0.716172	1.27693	1.13086	0.313234	2.09456	2.36118	1.52693	2.06905	1.66612	0.989675	0.593612	0.301481	0.0211034
		130	-0.00944914	0.352898	-0.137492	0.346628	1.25659	-0.137492	0.124863	0.783888	0.515262	0.608984	0.9182	1.23369	-0.137492	0.340358	0.124863	-0.00317957	0.9182	0.212315	0.783888	0.649575	0.165455	-0.143762	0.0374116	0.474671	0.212315	0.994231	0.259176	0.0436812	-0.00317957	0.306037	1.47835	0.662114	0.574662	0.662114	0.48721	0.662114	0.796427	-0.00317957	1.37427	2.91929	1.66579	2.57575	1.99791	0.95364	-0.265535	0.00309001	0.0905419
		131	0.199265	0.0243617	0.174769	0.762436	1.43454	-0.30095	0.437125	0.486118	0.961836	0.549073	0.723977	0.398666	0.174769	0.311214	0.674984	0.650488	0.961836	0.0488581	0.486118	0.486118	0.13631	0.199265	-0.126046	0.311214	0.0488581	0.93432	0.674984	-0.150542	-0.30095	-0.126046	1.52199	0.437125	0.349673	1.1507	0.262221	-0.0385938	0.912843	0.412628	0.849888	3.8836	1.41004	2.32	2.62081	1.47299	-0.563305	-0.563305	-0.475853
		132	0.196342	0.0214385	0.171846	0.759513	0.609105	-0.303873	0.434202	0.483194	0.958913	0.54615	0.721054	0.395742	0.171846	0.308291	0.672061	0.647564	0.958913	0.0459349	0.483194	0.483194	0.133387	0.196342	-0.128969	0.308291	0.437021	0.10889	0.672061	-0.153465	0.0872136	-0.128969	1.08764	0.434202	0.737836	1.14778	0.650384	0.349569	0.90992	1.19188	1.62914	4.58218	2.14895	1.45423	2.14613	1.03865	-0.566228	-0.566228	-0.478777
		133	0.0820808	0.448705	0.869877	0.741112	0.503252	0.0275339	-0.0466846	-0.339091	-0.0466846	-0.284544	-0.101232	-0.155778	0.503252	-0.339091	1.47436	1.3456	0.686565	0.0275339	0.0275339	0.0275339	-0.522403	0.0820808	-0.522403	0.394159	0.235308	0.81533	0.374487	-0.284544	-0.131317	-0.155778	0.527714	0.31994	0.711026	0.666893	1.07765	0.235308	1.16228	1.15666	1.88991	4.95563	2.12214	2.07322	2.20678	1.18674	-0.339091	-0.339091	-0.155778
		134	0.360637	0.414222	0.910574	0.230909	0.230909	0.230909	0.620092	-0.448755	-0.319028	-0.319028	-0.135715	-0.265443	0.230909	0.177324	0.964159	0.597534	0.101182	0.230909	0.230909	0.543949	-0.319028	0.047597	-0.319028	0.597534	0.125644	0.467807	-0.448755	-0.319028	0.0720587	0.360637	0.568411	0.047597	0.751723	-0.319028	0.492268	0.438683	0.414222	0.646457	1.37971	4.74615	1.92498	2.50214	1.5339	0.438683	0.177324	0.177324	0.360637
		135	0.802229	1.36867	1.35217	0.159646	0.159646	1.18536	1.57454	0.505693	-0.390291	-0.390291	0.305877	0.17615	0.159646	0.106061	1.40575	1.03913	0.0299188	0.159646	0.672502	0.985542	0.122565	-0.0236662	-0.390291	0.526271	-0.336706	0.396543	-0.520018	-0.390291	-0.390291	0.289374	0.106061	-0.0236662	0.802229	0.122565	0.0299188	1.00204	0.342959	0.305877	0.526271	2.32837	1.82794	1.6487	0.289374	-0.0236662	0.106061	0.106061	0.289374
		136	0.422379	0.622195	0.774935	-0.227238	-0.403516	0.622195	2.26643	0.309155	-0.227238	-0.0509606	0.81445	0.148855	0.125317	0.262079	0.638173	0.638173	-0.716556	0.830428	0.81445	0.951212	0.81445	-0.227238	-0.0509606	-0.403516	-0.364	0.34111	-0.187723	-0.0509606	-0.227238	0.0858015	0.790912	0.301595	0.951212	0.461895	-0.187723	0.974751	-0.0509606	0.285617	-0.227238	1.37748	2.68203	1.94582	1.31975	0.301595	0.790912	0.438357	0.0858015
		137	-0.00218172	1.16667	0.350374	-0.33876	-0.515037	0.510674	1.21578	0.510674	-0.33876	-0.162482	0.702929	0.350374	0.0137958	-0.162482	0.526651	0.526651	-0.515037	0.718907	1.35892	0.526651	0.702929	-0.33876	0.49351	-0.515037	-0.162482	1.19862	0.669788	-0.162482	-0.33876	-0.33876	1.02234	0.190074	0.526651	0.350374	0.0137958	1.51922	-0.162482	0.174096	-0.33876	0.0137958	2.25747	3.51915	2.20717	0.190074	1.02234	0.0137958	-0.33876
		138	-0.440168	0.446422	0.71948	0.427903	-0.440168	-0.20957	0.380242	-0.20957	0.427903	-0.0876125	0.495541	0.0276865	0.203964	0.604181	0.434562	0.66516	-0.440168	0.909075	1.03623	-0.0266337	0.61084	-0.26389	0.56838	-0.0942711	0.0276865	1.84999	1.32115	0.488882	0.312605	0.543202	1.55841	1.18733	0.549861	0.0276865	0.549861	1.02958	0.258284	-0.0332923	0.0820067	0.549861	1.13967	3.93992	3.31973	0.956737	1.32781	-0.141933	-0.494488
		139	-0.410894	0.794125	0.555413	0.121686	0.225963	0.456561	0.500476	0.297347	0.917757	0.066749	-0.180296	-0.454809	-0.295595	0.440114	-0.0649968	0.165601	-0.570108	-0.13638	0.360398	-0.526193	0.253432	-0.410894	0.245099	0.253432	0.341262	1.29924	1.29924	0.48403	0.48403	0.555413	0.865509	0.511498	0.527945	0.0228337	0.209516	1.50237	0.57186	-0.0210815	1.0495	0.846373	0.412646	3.67347	3.21249	1.07697	0.794125	0.15458	-0.163849
		140	-0.322801	0.0277875	0.643506	0.0113407	0.115618	0.544654	0.390131	0.187002	0.807412	-0.0435962	-0.092203	-0.565154	-0.40594	0.528207	-0.175342	0.452132	0.113298	-0.246726	-0.207502	-0.636538	0.539962	-0.124363	-0.322801	0.539962	1.02467	1.92196	1.52509	0.77056	0.373684	0.643506	0.297609	0.798028	0.616037	0.70624	0.892923	1.72822	0.659953	0.662325	1.33603	1.52978	0.699176	1.53447	2.38548	2.55413	1.41685	0.44111	-0.0757562
		141	-0.21271	-0.283231	-0.0534961	-0.379851	0.41622	0.709913	0.861201	0.638028	0.987754	0.0664945	0.0730567	-0.665618	-0.315892	-0.244007	-0.601659	0.0809832	0.509156	-0.251934	0.0730567	0.0651301	0.685179	-0.204784	-0.403222	0.2089	0.828949	1.07454	0.677661	0.304156	0.0977916	-0.148752	0.422782	-0.0142724	0.455444	1.17731	0.637073	2.23441	0.805169	1.39912	1.48125	1.36919	0.368115	1.58443	2.12467	3.11549	1.86788	0.591287	0.074421
		142	-0.0114732	-0.250381	0.138568	0.280683	0.205662	0.0492316	0.191347	0.961788	0.852217	-0.434973	0.124252	0.520061	0.260448	0.173119	-0.17536	0.507282	1.39475	0.165192	0.349314	0.716491	0.567987	0.071474	-0.352026	-0.0583324	0.243288	0.948173	0.251214	0.111944	0.205662	-0.406812	0.689867	0.261985	0.179038	1.21016	1.0542	1.7146	0.369549	1.89127	0.643008	1.44954	0.541833	1.04627	1.57734	3.57095	2.50089	0.521598	0.0980983
		143	0.0663271	0.0258572	-0.0254187	0.315134	0.240113	-0.114755	0.467585	0.996239	0.886668	-0.400522	-0.0397345	0.554512	0.536686	0.250919	0.100878	0.870219	1.36081	0.925005	0.185328	1.23452	0.205563	0.192624	0.692923	0.304604	-0.274226	0.077133	-0.464737	0.233093	0.4819	-0.329011	1.25124	0.141348	0.498625	0.934434	0.778473	0.998649	0.205563	1.61554	0.280583	0.932025	0.421196	0.48541	1.74184	3.71041	3.08058	0.159174	-0.0658885
		144	0.0193564	0.0493202	0.167766	0.19773	0.482942	-0.687648	-0.0556643	0.497813	0.0776521	-0.207338	-0.49255	0.242564	0.154305	0.754693	0.364496	0.84807	1.26823	1.11819	0.0927452	0.831345	0.25788	0.336164	0.836463	0.593044	-0.250763	0.17103	0.229548	0.426278	0.00426325	-0.0405712	0.487838	0.334532	0.501299	0.411185	0.99648	0.45461	0.25788	0.831345	0.3329	1.05478	0.709636	0.392828	1.62846	2.64045	3.18254	0.0625589	0.19773
		145	0.208588	0.0885099	0.348189	0.133956	0.588344	-0.36751	0.114432	0.275189	-0.362744	0.395267	0.0821115	-0.628821	-0.125723	0.380509	0.0461986	0.765162	0.744006	0.885239	0.301111	0.61753	0.635422	0.167908	0.987425	1.26186	0.276821	0.492686	0.474665	0.69053	-0.361112	0.166276	0.59324	0.30751	0.925919	0.685763	1.09307	0.615898	0.211722	0.61753	0.870811	0.427587	0.542898	0.348189	1.62209	1.87354	3.51604	0.197423	0.4635
		146	0.195986	0.140427	0.577374	0.750251	0.688493	-0.138325	0.10183	0.568893	-0.0045218	0.753489	0.311297	-0.528672	-0.0738066	0.30339	0.0981153	0.075431	0.118794	0.324545	0.530297	0.42766	1.05816	-0.0219623	0.265748	0.701167	0.328738	0.302815	0.784655	0.307105	-0.373714	0.605302	0.290619	0.423944	1.18768	0.883003	1.16128	1.11944	1.15061	1.00832	1.48711	1.06017	1.04644	1.15804	1.57755	0.990883	2.90774	0.36209	0.499131
		147	-7.64959e-05	0.0644418	0.141157	0.434111	0.0121202	-0.094232	0.288728	1.01867	-0.200584	0.317271	1.00123	0.0184579	0.736206	-0.252906	0.164935	-0.240709	-0.317424	-0.111673	0.094079	0.11152	1.53067	-0.218025	0.452645	0.647909	0.635712	1.11283	0.994279	-0.129113	0.436299	0.169085	0.334712	0.370686	0.751458	1.0699	0.604981	1.71203	0.857195	0.692184	1.19369	0.503873	0.610225	1.10478	1.16406	1.0577	3.52305	0.789142	0.56595
		148	-0.0818518	-0.114604	-0.0818518	0.207987	-0.40543	0.0154191	-0.0879755	0.943128	0.241726	0.338997	0.878609	-0.0224703	1.23494	-0.0490992	0.560168	-0.275407	-0.308159	-0.0490992	0.404503	-0.114604	1.35785	-0.114604	0.46191	0.23659	0.268355	0.748586	1.10393	-0.210888	0.586797	0.467047	0.500786	0.527415	0.920649	1.33636	0.143469	1.97226	1.30262	0.757873	1.27184	0.952414	1.11519	1.27086	1.23909	1.36813	3.32496	1.2093	0.302095
		149	0.250754	-0.070837	0.475074	-0.220384	-0.0933346	0.273251	-0.0544632	1.13644	0.295749	0.243473	1.13644	0.0653052	1.35348	-0.250162	0.828255	-0.347433	-0.14561	-0.025842	0.213695	-0.220384	1.04826	-0.295157	0.162576	-0.11402	0.312123	0.71758	0.814851	0.17598	0.620309	0.273251	0.0416507	0.431891	-0.0106251	1.06779	-0.220384	1.5644	0.476886	0.594842	0.693925	0.0416507	0.48301	0.87325	0.596655	0.746201	2.03735	1.98029	0.828255
		150	0.591422	0.362791	0.769262	0.120285	0.0614134	0.75336	-0.0967547	0.61823	0.543457	0.351741	0.61823	-0.0699464	0.835269	-0.00245383	0.785964	-0.0997247	0.148578	0.268346	0.554363	-0.158596	0.240053	-0.326329	-0.158596	-0.574632	-0.0555293	-0.0330317	0.157199	0.330728	0.0556177	0.474479	0.196399	0.017759	-0.0417975	0.74662	-0.112116	0.430825	0.202194	0.70311	0.372753	-0.0360017	0.451838	0.552078	0.136042	0.425029	0.567295	2.30984	1.76205
		151	0.547586	0.270205	0.798437	-0.0453126	-0.00691289	0.466232	-0.0435501	0.379853	0.0860472	0.0891036	0.525875	0.372803	0.524112	-0.0705495	0.91264	0.148483	0.0559915	0.273261	0.243206	-0.251182	0.464	0.384203	0.186883	-0.545457	0.143928	-0.00385654	0.162114	0.578936	0.0360421	0.771438	-0.23652	0.314717	-0.279944	0.557224	0.0873411	0.216938	0.304611	0.756776	0.256368	-0.249888	-0.199883	0.119159	-0.175115	-0.251182	-0.108686	1.73136	2.47281
		152	-0.106225	0.0742446	-0.0018506	-0.325257	-0.277647	0.042881	-0.398268	-0.0434977	-0.106843	-0.187771	0.102524	0.092858	0.0198472	-0.126174	0.336673	0.170702	-0.298727	0.0711602	0.112807	-0.531127	0.258829	0.256875	-0.0930622	-0.295847	-0.20772	-0.358575	-0.192604	-0.000102116	-0.162989	0.425931	0.174917	0.349218	0.203196	0.0529593	0.196615	-0.0568657	0.488658	0.264793	0.203814	-0.22767	-0.171524	-0.0737306	-0.149826	-0.297596	0.072291	1.94918	3.29803
		153	-0.507048	-0.0954031	-0.356193	-0.239878	-0.168414	-0.497382	-0.637023	-0.0272252	-0.252638	-0.194126	-0.0432711	-0.0529369	-0.125948	0.0521657	0.0979176	0.0249068	-0.328934	-0.283182	0.198187	-0.328934	0.182141	0.389961	-0.215004	-0.278349	-0.121115	-0.271969	-0.198958	-0.0529369	-0.100236	0.650751	-0.0399853	0.806438	0.336282	0.0930847	0.352328	0.0297397	0.482303	0.906708	0.568074	0.113964	-0.200506	0.29053	-0.132328	0.0666644	0.598619	2.14892	3.0556
		154	-0.729212	0.0395014	-0.0709886	0.284608	0.30331	-0.309716	-0.0922884	-0.0911041	-0.255769	-0.278253	-0.411457	-0.619906	-0.567144	-0.401295	-0.647586	-0.594824	-0.5106	-0.756892	-0.348533	-0.405077	-0.616124	-0.594824	-0.940259	-0.679048	-0.436539	-0.356097	-0.514382	-0.303335	-0.249389	0.0432836	-0.0511024	0.46278	0.402454	-0.303335	0.353474	0.063399	0.191407	0.498024	0.151405	0.200385	-0.17911	0.595983	-0.309716	0.0432836	0.230433	1.85802	2.09534
		155	-0.246378	0.288804	0.476472	0.767442	0.26767	0.302373	0.390545	0.093571	-0.511724	-0.158206	0.0581605	-0.279544	0.200632	-0.0609321	-0.242596	0.522522	-0.45518	-0.636844	0.276772	-0.492128	-0.560704	-0.189834	-0.742367	-0.636844	-0.0315489	-0.158206	-0.0315489	0.037027	0.220228	0.150115	-0.320273	-0.0134897	0.0686553	-0.105444	0.162147	-0.179339	0.142551	0.0995983	0.413924	0.177961	0.212664	0.767442	0.0174307	0.00764381	-0.0255216	1.66524	1.09914
		156	-0.216224	-0.00517672	0.506627	0.311394	-0.0263102	0.332527	0.258632	0.0964504	-0.643637	-0.290119	-0.0737526	-0.411457	0.0687185	-0.51698	-0.374509	0.390608	-0.749161	-0.30983	0.117584	-0.786108	-0.854684	-0.321747	-0.712213	-0.60669	0.133398	0.00674097	-0.163462	0.201974	-0.0737526	0.584647	0.303601	0.124182	-0.0632578	-0.237357	0.461886	-0.311252	0.307497	-0.680585	-0.0421243	0.4777	0.836538	0.311394	0.641305	-0.151544	-0.643637	0.722993	0.291683
		157	0.365609	-0.173265	0.148831	-0.35289	-0.637832	0.291302	-0.173265	-0.198501	-0.421054	-0.458207	0.687705	-0.495361	0.291302	0.223138	0.00635965	1.07796	-0.241429	-0.340972	0.80494	-0.204276	-0.0618044	0.185984	0.0806668	-0.458207	0.123595	0.197902	0.185984	0.160748	0.328456	0.754468	-0.0441121	-0.329054	-0.780303	-0.458207	0.494762	-0.3839	0.340373	-0.563525	0.402763	0.352291	1.28142	0.365609	0.959329	0.736776	-0.0618044	1.47437	1.20134
		158	-0.0168436	-0.273747	-0.376093	-0.735342	-0.453372	-0.376093	-0.555718	-0.438482	-0.376093	-0.273747	0.162781	-0.735342	-0.376093	-0.0168436	-0.376093	0.265127	-0.196468	-0.438482	0.280016	-0.0168436	-0.0168436	-0.196468	0.547097	-0.555718	-0.258858	0.100392	-0.196468	0.202737	-0.196468	0.514487	-0.141622	-0.141622	-0.735342	-0.555718	0.397252	-0.196468	0.100392	-0.376093	0.444752	0.679222	1.88438	-0.0168436	0.858847	1.76715	0.265127	0.522031	1.38283
		159	0.642673	0.0144042	-0.273624	-0.0758263	0.0204618	-0.0879414	-0.267566	-0.447191	-0.273624	-0.171278	0.26525	-0.261509	-0.0879414	-0.100057	-0.459306	0.738961	0.277366	-0.261509	0.45699	0.271308	0.271308	0.463048	1.02093	0.289481	0.289481	0.0916833	0.0916833	-0.177336	0.0916833	0.0977408	-0.632873	0.109856	-0.261509	-0.0818839	0.463048	0.277366	-0.093999	-0.273624	0.732903	0.00228908	1.39313	0.45699	0.553278	1.38707	0.367596	0.6245	1.00276
		160	0.0973074	0.00791318	-0.45974	0.0973074	0.193595	-0.184585	-0.184585	-0.274057	-0.45974	-0.177769	-0.45974	-0.0883749	-0.274057	-0.645422	-0.466477	0.372541	0.0010976	-0.0883749	0.0010976	-0.274057	-0.184585	0.0973074	0.475566	0.372462	0.28299	-0.274057	-0.274057	-0.363451	-0.274057	-0.0883749	-0.45974	0.28299	0.0010976	-0.0883749	0.0973074	0.0905701	-0.45974	-0.45974	0.00791318	-0.363451	0.668142	-0.0883749	0.00791318	0.661405	-0.177769	0.613931	0.723772
		161	0.116038	-0.255326	-0.441009	0.116038	-0.069644	-0.165854	-0.165854	-0.255326	-0.441009	-0.441009	-0.441009	-0.069644	-0.255326	-0.626691	-0.447746	0.109301	0.0198285	-0.069644	0.0198285	0.0818584	-0.165854	0.116038	-0.069644	0.391193	0.301721	-0.255326	-0.255326	-0.626691	-0.255326	-0.069644	-0.441009	0.301721	0.0198285	0.267541	0.453223	0.446486	0.570546	-0.441009	0.0818584	-0.626691	0.233361	0.267541	-0.255326	-0.447746	-0.441009	0.969847	1.19012
		162	-0.232417	-0.569411	-0.527286	-0.443038	-0.527286	-0.227193	-0.311441	-0.443038	-0.485162	-0.485162	-0.527286	-0.443038	-0.569411	-0.695783	-0.474714	-0.348341	-0.39569	-0.443038	-0.0586963	-0.021605	-0.39569	-0.569411	-0.485162	-0.522062	-0.443038	-0.35879	-0.316666	-0.316666	-0.611535	-0.35879	-0.400914	-0.35879	-0.311441	0.0205192	-0.0637291	0.199464	0.484268	-0.106045	0.104768	-0.527286	0.441952	-0.0637291	-0.274541	-0.13772	-0.316666	1.51543	1.92138
		163	-0.313796	-0.65079	-0.608666	-0.131992	-0.21624	-0.398045	-0.482293	-0.131992	-0.566541	-0.174116	-0.608666	-0.524417	-0.65079	-0.777162	-0.342612	-0.21624	-0.566541	-0.524417	-0.229548	-0.102984	-0.566541	-0.258364	-0.174116	-0.300488	-0.524417	-0.440169	-0.398045	-0.398045	-0.692914	-0.440169	-0.482293	-0.440169	-0.482293	-0.06086	-0.145108	-0.06086	0.795314	-0.187424	0.0233884	-0.608666	0.360573	-0.145108	-0.355921	-0.398045	-0.398045	0.360382	1.42718
		164	0.0199315	-0.150016	-0.60903	0.0346903	-0.216604	0.269775	-0.315611	-0.299402	-0.566906	-0.341526	-0.60903	-0.357735	-0.8182	-0.777527	-0.342977	-0.38365	-0.232813	-0.524782	-0.0628662	-0.273487	-0.232813	-0.425774	0.326658	-0.133806	0.310449	0.0606051	0.102729	0.102729	-0.693278	0.0606051	-0.148565	-0.273487	0.018481	0.269775	0.352573	-0.732501	-0.216604	-0.0207421	0.186978	-0.60903	0.354024	0.018481	0.645992	-0.0643168	0.269775	-0.31126	0.582305
		165	0.0576468	0.502105	-0.692564	-0.133092	0.254686	0.114327	0.0293068	-0.60589	-0.415152	0.226346	-0.137739	-0.525518	-0.582198	-0.276445	0.11598	-0.328478	0.0576468	-0.276445	0.168013	-0.248105	-0.358472	0.0876403	0.478413	0.560439	0.420079	0.640811	-0.0527193	-0.0527193	-0.415152	-0.191425	-0.0810593	-0.386812	0.0859868	0.253033	0.836197	-0.749244	0.254686	0.168013	0.502105	0.000966825	0.807857	-0.0527193	1.00324	0.473765	0.391739	-0.610538	0.560439
		166	0.181273	0.557711	-0.636958	-0.537933	-0.0821339	0.169932	0.152933	-0.738648	-0.0874626	0.0935887	-0.014113	-0.333871	-0.254509	0.187285	-0.22084	-0.597278	0.181273	-0.0847983	0.563723	0.0795835	-0.0988035	-0.0451174	0.345655	0.291639	0.543705	0.628396	0.00288607	0.00288607	-0.427567	-0.0677992	0.042567	-0.331206	0.209613	0.376659	1.09587	-0.489576	0.257971	0.35966	0.48969	-0.0114487	0.863463	-0.0651348	1.12687	0.529371	0.379324	-0.418891	0.427681
		167	-0.23252	-0.0231289	-0.71666	-0.731006	-0.0544868	-0.577953	0.174556	-0.704977	-0.0598155	0.288282	-0.04014	-0.419595	-0.167164	0.107584	-0.354215	-0.509933	-0.286194	-0.218174	0.316976	-0.220838	-0.566271	-0.0114465	-0.288859	0.044892	-0.424901	-0.0061178	-0.577953	-0.631628	-0.453594	-0.702313	-0.371226	-0.631628	-0.371226	-0.424901	0.180934	-0.18151	0.178269	0.0592387	-0.144824	-0.0374757	0.0619031	-0.645974	0.0985661	0.115577	-0.368562	0.211219	0.502978
		168	-0.578614	-0.475179	-0.646635	-0.489526	-0.453559	-0.389452	-0.0530602	-0.410519	-0.0100199	0.436326	-0.182029	-0.263843	-0.0316404	0.190129	-0.700309	-0.149975	-0.375105	-0.47854	-0.0493473	-0.25677	-0.496246	-0.496246	-0.496246	-0.235703	-0.460833	-0.682602	-0.389452	-0.528854	-0.575254	-0.54656	0.192936	-0.528854	-0.235703	-0.375105	-0.356844	-0.30317	-0.30653	-0.307084	-0.596874	-0.489526	-0.100215	-0.028834	-0.182029	-0.646635	-0.628928	0.722403	0.479567
		169	-0.460367	-0.592507	-0.612165	-0.538833	-0.570887	-0.354982	-0.238409	-0.731909	-0.399431	0.266733	-0.0637817	-0.365415	-0.269254	-0.335324	-0.665839	-0.335324	-0.408656	-0.580111	-0.50678	-0.494383	-0.817637	-0.514041	-0.817637	-0.269254	-0.646182	-0.731909	-0.50678	-0.646182	-0.624561	-0.580111	0.159385	-0.342585	-0.117456	-0.10506	-0.222841	-0.472763	-0.308569	-0.408656	-0.646182	-0.387035	-0.217543	0.073657	-0.367378	-0.460367	-0.678235	0.469033	0.309974
		170	-0.337113	-0.608302	-0.535261	-0.446079	-0.64768	-0.231728	-0.314002	-0.531807	-0.406701	0.259464	-0.0405517	-0.449533	-0.146	-0.30477	-0.535261	-0.327944	-0.347602	-0.403183	-0.406701	-0.34063	-0.640709	-0.429812	-0.640709	-0.00695188	-0.39973	-0.439108	-0.290827	-0.260681	-0.369584	-0.380009	0.468036	-0.049784	0.0984967	0.118218	-0.122762	-0.449533	-0.115791	-0.301252	-0.492428	-0.201582	-0.0637899	0.173736	-0.367323	-0.290764	-0.624506	0.842286	0.806425
		171	-0.207377	-0.650022	-0.428422	-0.464901	-0.580775	-0.382072	-0.441449	-0.442005	-0.534148	-0.405247	-0.253727	-0.405525	-0.382072	-0.626569	-0.313937	-0.649744	-0.475049	-0.290484	-0.511251	-0.38235	-0.419385	-0.300076	-0.488076	-0.19723	-0.395655	-0.349306	-0.37248	-0.23371	-0.348472	-0.290206	-0.0821895	-0.0915034	-0.0688842	0.0136674	-0.0329598	-0.428422	-0.00895177	-0.428699	-0.44256	-0.243301	-0.534148	-0.405247	-0.580497	-0.138131	-0.534703	0.160538	0.427655
		172	-0.366796	-0.258067	-0.00243231	0.0509415	-0.00298787	-0.20386	-0.0494946	0.197727	-0.0802492	-0.16509	-0.103424	-0.289257	0.0439172	-0.17267	0.297885	-0.257789	0.0128847	-0.174216	-0.0573522	-0.0183049	-0.15132	-0.211718	-0.343899	-0.328739	-0.127589	-0.0812398	-0.104415	-0.151477	-0.142351	0.0738384	0.157967	-0.250922	0.0194741	-0.173661	0.0894333	-0.250209	0.113441	-0.0646544	-0.174494	-0.0650894	0.167528	0.392408	0.121178	0.136061	-0.142749	0.118883	0.35809
		173	-0.346845	0.0725226	0.235459	0.219308	-0.0619285	-0.3555	0.0725226	0.194503	0.134467	-0.121965	0.306057	0.120224	0.407049	0.11157	0.535776	-0.121965	0.3203	-0.325856	0.500545	0.368002	0.0402218	-0.0990679	-0.323948	-0.619427	-0.348753	-0.348753	-0.177163	-0.511689	-0.307798	0.0706146	0.335701	0.854288	-0.053274	-0.200059	0.132559	-0.183909	0.063868	0.368002	-0.131369	0.0105783	0.382244	0.263943	0.0390631	-0.0619285	-0.224864	0.199478	0.19757
		174	-0.490171	0.0313603	0.115029	0.257413	0.0272579	-0.424847	0.28677	0.567284	0.24655	-0.14023	0.520305	0.0790622	0.28662	0.297632	0.50519	0.166261	0.636711	-0.129218	0.998386	0.480085	-0.245774	-0.14023	-0.336925	-0.734568	-0.486791	-0.486791	-0.0597912	-0.723706	-0.479309	-0.118505	0.202951	0.813126	-0.14023	-0.468446	-0.0565612	-0.35542	0.198848	0.275757	-0.417364	-0.132748	0.29	0.245678	0.0489827	-0.125988	-0.465066	0.623341	0.320229
		175	0.343384	-0.176344	-0.278508	-0.414245	-0.479634	-0.457252	0.0790651	0.451867	0.43032	-0.00787064	0.36401	0.108601	0.233146	0.254693	0.605948	-0.0414434	0.294584	0.35374	1.0688	-0.0782177	-0.442945	-0.23458	-0.183498	-0.457252	0.109521	-0.683962	-0.0302525	-0.16827	-0.841245	-0.336744	-0.00475392	0.966553	-0.574644	-0.778972	-0.336744	-0.387826	0.0320203	0.284228	-0.501181	-0.165153	-0.114072	-0.63288	-0.468443	-0.519525	-0.672771	1.41602	1.10237
		176	0.823257	-0.164648	-0.563398	-0.699135	-0.124757	-0.398961	0.387348	0.635153	1.33177	0.472002	0.797288	-0.0512933	-0.223334	-0.030197	1.21082	0.141843	0.602866	0.708617	0.737317	-0.238112	-0.727835	-0.347879	-0.296797	-0.398961	1.05757	-0.625671	-0.143552	0.483193	-0.657958	-0.450043	-0.461234	-0.347879	-0.687944	-0.892271	-0.153457	-0.501125	-0.0812789	-0.172252	-0.61448	-0.450043	0.194211	-0.278003	-0.410152	-0.164648	-0.317894	0.616359	0.474304
		177	0.971749	-0.11832	-0.414906	-0.729164	-0.231675	-0.301551	0.204072	0.24755	1.22486	0.51833	0.614013	-0.00496529	-0.0490357	-0.188197	1.18079	-0.0667076	0.317427	0.47426	0.24755	-0.345029	-0.528261	-0.301551	-0.249939	-0.301551	1.15498	-0.502455	-0.301551	0.709104	-0.380966	-0.249939	-0.3891	-0.275745	-0.615809	-0.641616	-0.00496529	-0.275745	-0.136584	-0.0748419	-0.363294	-0.275745	0.291621	-0.231675	-0.414906	-0.11832	-0.11832	0.332511	0.394253
		178	0.10142	-0.179099	-0.486397	-0.449879	-0.179099	-0.481041	0.154005	-0.164004	0.694592	0.122843	0.429168	-0.173743	-0.465946	-0.491752	0.434524	-0.132842	0.148649	-0.164004	-0.137225	-0.163031	-0.470329	-0.486397	-0.402649	-0.448906	0.414073	-0.46059	-0.470329	0.200262	-0.0481219	-0.370514	-0.401676	-0.433811	-0.444523	-0.481041	-0.179099	-0.455234	-0.424072	-0.470329	-0.434784	-0.433811	0.10142	-0.179099	-0.481041	-0.18981	-0.184455	0.0637988	-0.0520835
		179	-0.464858	-0.44879	-0.459502	-0.422984	-0.44879	0.0228209	-0.253283	-0.274707	-0.305869	-0.443435	-0.433696	-0.443435	-0.439052	-0.464858	-0.42834	-0.402534	-0.258639	-0.274707	-0.0889386	0.0442442	-0.443435	-0.459502	-0.375755	-0.422011	-0.44879	-0.433696	-0.125457	-0.366016	-0.317813	-0.34362	-0.374782	-0.406917	-0.417628	-0.454146	-0.289801	-0.42834	-0.238189	-0.443435	-0.40789	-0.0889386	-0.305869	-0.44879	-0.136168	-0.300513	-0.295157	0.885638	0.292789
		180	-0.540605	-0.455539	-0.535249	-0.524537	-0.524537	-0.0184267	-0.285838	-0.272762	-0.14012	-0.484682	-0.50075	-0.381184	-0.506105	-0.540605	-0.529893	-0.495394	-0.394692	-0.238262	-0.190492	0.00299656	-0.519182	-0.569749	-0.468615	-0.497758	-0.524537	-0.569749	-0.0977052	-0.381184	-0.40198	-0.332981	-0.407336	-0.50847	-0.519182	-0.529893	-0.365548	-0.529893	-0.331049	-0.381184	-0.535249	-0.224991	-0.347116	-0.559037	-0.246415	-0.41076	-0.370904	0.629248	0.15701
		181	-0.0636316	-0.40355	0.243056	-0.677007	-0.165861	-0.0633111	-0.449019	-0.210061	0.030166	0.073097	-0.131361	-0.232321	-0.33582	0.243056	-0.0636316	-0.33582	-0.348059	-0.277791	-0.0523412	0.550064	-0.165861	0.106327	-0.0291322	0.345285	-0.165861	0.208556	0.153386	-0.027863	-0.0968619	-0.334551	-0.199091	0.243056	-0.677007	-0.370319	-0.21133	-0.26809	-0.176831	-0.130092	-0.370319	0.526535	0.232086	0.106327	-0.291299	-0.1436	-0.109101	0.322397	-0.0855715
		182	0.147373	-0.304626	0.229898	-0.522043	0.0451437	-0.497395	-0.565125	-0.270127	-0.141981	0.172021	0.0236026	-0.0773574	-0.292937	0.39802	0.0913324	-0.405018	-0.576246	-0.113694	-0.103274	0.0599395	0.325346	0.429413	-0.0983302	0.55629	-0.0108968	0.25144	0.102453	0.01502	0.00206159	-0.0675056	0.0119134	0.341979	-0.522043	-0.383477	-0.439517	-0.0570855	-0.292937	0.0809123	-0.383477	0.083318	0.11598	-0.0189112	-0.342232	-0.427828	-0.281248	-0.317584	-0.360667
		183	0.391523	-0.129475	0.154707	-0.357728	0.369129	-0.36758	-0.389974	-0.368981	-0.298998	0.142165	0.313089	0.0287949	-0.163122	0.402664	0.335483	-0.195367	-0.457267	0.152129	0.0610404	0.26959	0.489661	0.628227	0.11132	0.481098	0.233253	0.929267	0.642283	0.201008	0.57639	0.278153	0.426571	0.58613	-0.517399	-0.298998	-0.0356961	0.2669	0.0763849	0.666078	0.0203444	0.361968	0.644973	0.259738	0.175924	-0.388685	0.0427381	-0.233105	-0.504857
		184	-0.109535	-0.19669	-0.653039	-0.220485	-0.0172363	-0.320103	-0.302582	-0.473585	-0.480905	-0.461122	-0.0857398	-0.153112	-0.369955	-0.442471	-0.165575	-0.377274	-0.499556	0.149754	-0.13333	-0.371086	0.103295	-0.0772892	-0.4022	-0.403951	-0.165575	0.146447	0.432924	-0.147969	0.239877	0.248327	0.167361	-0.221616	-0.317841	-0.468442	-0.217603	0.0575416	-0.0681333	0.394404	-0.0743219	-0.395926	0.0666117	-0.358537	0.223401	-0.697747	-0.216472	-0.150764	-0.198183
		185	-0.328262	-0.303336	-0.517847	-0.188536	0.153308	-0.30583	-0.28831	-0.385596	-0.345713	-0.567769	-0.118669	-0.380678	0.0335901	-0.540279	-0.393141	-0.186042	-0.243445	-0.245933	-0.0837044	-0.43053	-0.265878	-0.148583	-0.405604	-0.428042	-0.198505	0.225598	0.352792	-0.198575	0.198109	-0.026441	0.0135117	-0.263384	-0.545407	-0.33325	-0.026371	0.0334501	-0.0538608	0.305434	-0.133766	-0.343289	0.0808843	-0.0463854	0.0135117	-0.645111	-0.275917	0.270457	0.594634
		186	-0.184109	-0.363306	0.353895	-0.0666086	-0.292682	-0.183903	-0.144156	-0.308121	-0.246012	-0.0820475	-0.56466	-0.440648	0.563764	-0.564866	-0.248988	-0.348074	-0.143744	-0.465574	0.0382228	-0.796685	-0.14395	-0.332841	-0.363512	0.137515	-0.360537	-0.437672	-0.208417	-0.440442	-0.261039	-0.223856	0.122282	-0.7316	-0.161747	-0.437672	-0.552197	-0.41254	-0.78381	-0.743857	-0.761654	-0.0970742	-0.196366	-0.208417	-0.285965	-0.669697	-0.619845	0.778404	0.547822
		187	6.46723e-05	-0.0958307	0.862752	0.200867	0.203712	0.0711096	0.0649434	-0.219712	-0.0743011	0.210354	-0.488714	0.0557462	0.976856	-0.235075	-0.064814	0.0400929	0.0988054	0.38043	0.438852	-0.358666	0.135988	0.0677887	-0.166876	0.188535	-0.176363	-0.170197	-0.32794	-0.197892	0.618415	0.763826	1.02666	0.318396	0.0434138	0.0462591	0.485337	0.117304	-0.324804	-0.909293	-0.893639	0.361931	-0.145346	-0.00325622	0.0772758	-0.47306	-0.47306	0.571641	0.00849634
		188	0.0118901	-0.0840053	0.726537	0.0180563	-0.155452	0.0180563	0.0210315	-0.411664	-0.201375	0.213038	-0.597504	0.123309	0.543672	-0.278987	0.030173	-0.0869806	-0.0840053	0.457134	0.117143	-0.300245	-0.000226679	-0.189042	-0.099313	-0.00341762	-0.303436	-0.306412	-0.529033	-0.20435	0.547079	0.793934	0.973608	0.274484	0.156684	-0.0716729	0.349122	-0.0563652	-0.386999	-1.03637	-0.826077	0.429494	-0.170975	-0.20435	0.015081	-0.396356	-0.396356	0.310368	-0.557999
		189	-0.384476	-0.208605	-0.0273428	-0.191694	-0.0076877	-0.242426	-0.341513	-0.501845	-0.376706	-0.3023	-0.466651	-0.0689337	-0.1927	-0.267106	-0.400014	-0.14334	-0.293159	0.281802	-0.194072	-0.101749	-0.260709	-0.14334	-0.325974	-0.434202	-0.359796	-0.260709	-0.585393	-0.226888	0.490122	0.618005	0.491494	0.507399	-0.172039	-0.00905988	0.530707	0.209774	-0.0182014	-0.718301	-0.474787	0.032531	-0.313082	-0.193066	-0.14334	-0.2661	-0.2661	0.284845	0.300018
		190	-0.508432	-0.335318	-0.433794	-0.48716	-0.414139	-0.495704	-0.444375	-0.454291	-0.521757	-0.724331	-0.58785	-0.665232	-0.512018	-0.562573	-0.608347	-0.52594	-0.588625	-0.533709	-0.661049	-0.547632	-0.513987	-0.504846	-0.534307	-0.492118	-0.589222	-0.598364	-0.57727	-0.606731	-0.454711	-0.371773	-0.390056	-0.503474	-0.404223	-0.4577	-0.50126	-0.283811	-0.445747	-0.475385	-0.529946	-0.37392	-0.32881	-0.446344	-0.504846	-0.474433	-0.390056	0.525004	0.606216
		191	-0.628838	-0.216282	-0.200698	-0.272347	-0.361274	-0.137226	-0.430257	-0.469779	-0.345691	-0.787708	-0.33429	-0.632832	-0.689454	-0.692121	-0.603371	-0.541428	-0.709032	-0.558339	-0.772314	-0.553978	-0.616111	-0.616111	-0.549795	-0.699161	-0.796265	-0.796265	-0.77517	-0.756743	-0.556835	-0.318909	-0.558351	-0.441468	-0.321753	-0.43444	-0.555495	-0.413359	-0.509123	-0.682427	-0.641211	-0.389408	-0.572418	-0.404802	-0.616111	-0.546951	-0.462574	0.285341	0.555926
		192	0.637179	0.0254324	-0.324737	0.0481224	0.105594	0.0426441	-0.346053	-0.351753	-0.244576	-0.365774	0.245155	-0.132142	-0.441941	-0.478429	-0.451524	-0.648556	-0.765427	-0.265892	-0.446046	-0.329175	-0.244909	-0.531907	-0.30808	-0.170448	-0.807727	-0.712061	-0.308302	-0.897692	-0.191431	-0.510591	-0.654367	-0.244687	-0.462702	-0.367147	-0.313781	-0.638863	-0.537496	-0.468736	-0.562806	-0.277182	-0.415258	-0.292575	-0.0535769	-0.451635	-0.271592	-0.362932	-0.261455
		193	0.46184	0.681377	0.113463	0.217091	0.262767	0.544127	0.206917	-0.121998	0.163231	0.0234358	0.737338	0.495905	0.392055	-0.403136	-0.0741098	-0.688032	-0.596458	-0.211693	-0.0264433	-0.118017	-0.118128	-0.405126	0.0693338	0.352129	-0.690245	-0.594579	-0.30559	-0.550671	0.35224	-0.217553	-0.36133	0.0694448	-0.169665	-0.261461	-0.259581	-0.783809	-0.0782019	-0.498913	-0.777837	-0.49471	-0.0285448	-0.0721192	0.166879	-0.542598	-0.353257	-0.311229	0.0197877
		194	0.789425	0.769519	-0.167761	0.0270641	0.307602	0.30163	0.117247	0.0186134	0.0210924	0.211936	0.590619	0.679825	0.858725	-0.257943	0.383399	-0.456224	0.095913	0.0201157	0.483535	-0.342191	0.0270641	0.0136556	0.209945	0.866688	-0.449275	-0.262413	-0.155817	-0.266394	0.679825	-0.263915	-0.350642	0.387869	-0.172719	-0.259934	-0.253474	-0.456224	0.110298	-0.257943	-0.267859	-0.0805083	0.57721	1.11496	0.768054	0.0106883	0.473619	0.189589	0.10335
		195	-0.425664	0.511091	-0.162774	-0.32703	-0.261407	0.258116	0.288647	0.190014	0.430989	-0.142158	-0.0740559	0.230064	0.815211	-0.539954	0.674048	-0.21274	0.697142	-0.119065	0.344355	-0.481372	-0.446279	0.0658074	0.0707653	0.798254	-0.182209	-0.448758	-0.605578	0.0963382	0.349313	-0.258928	-0.0835759	0.463603	0.786255	-0.207782	-0.273406	-0.331988	0.138868	-0.420706	-0.54987	0.233723	0.676527	1.07145	0.222628	-0.0328259	0.692184	0.313824	0.58533
		196	-0.199411	-0.199411	-0.254882	-0.381804	-0.283343	-0.340043	-0.361017	-0.262965	0.13736	-0.332778	-0.578539	-0.283753	0.0532046	-0.627565	0.305411	-0.164505	0.558027	-0.248846	0.0178885	-0.747	-0.585394	-0.0311371	-0.297872	0.284437	0.109718	-0.199002	-0.346488	0.158743	-0.0801628	-0.627565	-0.28353	0.390162	0.544131	-0.0517014	0.0606922	-0.0307276	-0.332778	-0.592659	-0.347121	0.375634	0.256385	0.754315	0.0320076	0.235598	0.74042	0.123204	0.460385
		197	-0.488181	-0.423011	-0.139722	-0.292671	-0.480916	-0.342106	-0.311027	-0.590878	0.0961535	-0.8562	-0.841282	-0.442183	-0.261592	-0.668772	-0.452458	-0.713953	-0.0955289	-0.667955	-0.453274	-0.579787	-0.235582	-0.411103	-0.169596	-0.0955289	0.32919	-0.461744	0.0293509	0.0263403	-0.303762	-0.668772	-0.0771734	-0.14617	0.672407	-0.158078	0.175852	0.00635196	-0.660691	-0.633865	-0.492434	0.0348107	-0.279947	-0.667955	-0.334842	-0.261592	0.16515	-0.139333	0.732117
		198	-0.241484	-0.461837	-0.0593002	-0.0459748	-0.400494	-0.595355	-0.683524	-0.773027	-0.419666	-0.990201	-0.856034	-0.576183	-0.419666	-0.683524	-0.849029	-0.872028	-0.706523	-0.540507	-0.421	-0.452339	-0.15516	-0.474004	-0.232496	-0.611349	0.0518675	-0.381322	0.371221	0.03454	-0.366663	-0.398001	-0.449671	-0.423493	-0.201158	-0.411327	-0.00629689	-0.0324743	-0.794692	-0.767866	-0.316838	-0.100312	-0.676518	-0.445333	0.00702852	0.0562049	-0.350669	0.488061	0.335546
		199	-0.358975	-0.302417	-0.514158	0.113445	-0.367587	-0.267252	-0.397592	-0.679663	-0.579327	-1.06552	-0.804841	-0.332422	-0.579327	-0.397592	-0.840007	-0.905176	-0.739671	-0.489314	-0.454149	-0.358975	0.365511	-0.272413	-0.223474	-0.644497	0.235172	-0.709667	0.404128	-0.293805	-0.484153	-0.112069	-0.609332	-0.709667	-0.318648	-0.739671	-0.418983	-0.0417382	-0.593101	-0.674502	0.607256	0.143449	-0.432757	0.15968	-0.068291	0.450364	-0.106908	0.412741	0.284111
		200	-0.29816	-0.191253	-0.517672	0.0282581	-0.306773	-0.385444	-0.434953	-0.538017	-0.616689	-0.744869	-0.678857	-0.434953	-0.649694	-0.451456	-0.633191	-0.666197	-0.69536	-0.364172	-0.409837	-0.314663	-0.0298629	-0.261107	-0.55452	-0.633191	-0.0298629	-0.633191	0.0739238	-0.347669	-0.538017	-0.132927	-0.662354	-0.600186	-0.600186	-0.69536	-0.521514	-0.339779	-0.467958	-0.728366	0.27621	0.0409182	-0.323276	0.350834	-0.252495	0.379997	-0.257264	0.528113	0.00678074
		201	0.07367	-0.109571	0.283599	-0.0316648	-0.0811733	-0.0646704	0.173657	0.0241615	-0.247171	0.00765871	-0.358083	0.0297389	-0.424095	-0.2746	-0.695427	-0.440597	-0.662422	-0.568012	-0.662422	-0.662422	-0.0920988	-0.2746	-0.280177	-0.695427	-0.0920988	-0.695427	-0.369009	-0.695427	-0.55151	-0.385512	-0.629416	-0.374586	-0.518504	-0.518504	0.0406644	0.317574	0.140651	-0.263674	0.982307	0.317574	0.0462417	0.339655	-0.55151	-0.15811	0.112253	-0.200343	-0.0554551
		202	0.267639	-0.394081	0.276	-0.316174	-0.365683	-0.34918	-0.110853	0.0165622	-0.0532019	0.201628	-0.365683	-0.0532019	-0.0285567	-0.559109	-0.703027	-0.448197	-0.670021	-0.575612	-0.670021	-0.468452	-0.45195	-0.155972	-0.287776	-0.0983208	-0.653518	-0.703027	-0.250381	-0.703027	-0.35754	-0.266884	-0.637015	0.0209518	-0.324535	-0.122966	0.637771	0.234634	-0.143858	-0.0697047	0.345546	0.033065	-0.238268	-0.221765	-0.559109	-0.114824	0.0293122	-0.207942	-0.339965
		203	0.316975	-0.460265	0.259324	-0.201535	-0.201535	-0.201535	0.0863006	0.115406	0.0291395	0.431787	-0.086723	0.258763	0.431226	-0.00101687	-0.144935	0.372525	-0.144935	0.113795	-0.604182	-0.287802	-0.517426	0.0576846	-0.287241	-0.114288	-0.718994	-0.489371	0.0285787	-0.604182	-0.373508	-0.0862332	-0.489371	0.316414	-0.0290721	0.172497	0.834924	0.431787	-0.0285114	-0.0856725	0.346081	0.00059445	-0.172429	-0.0576172	-0.460265	0.000523465	0.258763	-0.718994	-0.718994
		204	-0.334512	0.235746	-0.53608	-0.517747	-0.710703	-0.32479	-0.421268	-0.632558	-0.43099	-0.316178	-0.0170216	-0.297844	0.404449	-0.0768324	0.116124	0.442226	-0.0768324	0.423892	0.0427892	0.0697351	-0.64228	0.657217	-0.843849	-0.142664	-0.650892	-0.131834	0.000202727	-0.921993	-0.64228	-0.211087	-0.517747	0.579072	-0.104888	0.096681	0.279916	0.262692	0.0427892	0.0330676	-0.0634106	-0.264979	-0.53608	-0.614225	-0.150167	-0.124331	-0.104888	-0.457936	-0.457936
		205	-0.507507	0.34557	-0.426256	-0.529798	-0.682129	-0.336842	-0.392695	-0.563359	-0.603985	-0.367296	0.0521775	-0.430214	0.111137	-0.00763324	0.225949	0.714553	-0.0482587	0.533717	0.152614	-0.0220089	-0.774649	0.282653	-0.774649	-0.678171	-0.581693	-0.0626344	-0.374361	-0.852794	-0.774649	-0.545026	-0.367296	0.204509	-0.318508	-0.237257	-0.336842	0.211573	0.0713629	-0.0586764	-0.236406	-0.236406	-0.548132	-0.463775	-0.0403427	-0.578587	-0.277883	-0.185609	-0.226235
		206	-0.23675	0.616327	-0.155499	-0.373854	-0.307794	0.255884	-0.455141	-0.510993	-0.333228	-0.211352	0.966872	-0.389081	-0.180933	0.0222659	-0.399324	-0.140344	-0.673531	-0.206367	0.42337	-0.302846	-0.389081	0.220207	-0.825862	-0.510993	-0.632906	0.311701	-0.77001	-1.01882	-0.170691	-0.825862	-0.211352	0.0272504	-0.277376	-0.414515	0.0374932	-0.0692637	0.56051	0.545283	0.149163	0.367553	0.159406	-0.30783	-0.206367	-0.30783	-0.673531	-0.236822	-0.277447
		207	0.0344244	-0.0101646	0.367355	0.245479	0.630335	0.43058	0.0677137	-0.395021	0.0344244	-0.095379	1.45197	0.0750499	-0.102715	0.41928	-0.195266	-0.284444	-0.654037	-0.446946	-0.387684	-0.446946	-0.17663	-0.183966	-0.613411	-0.143341	-0.361731	0.0417606	-0.654037	-0.235891	0.29344	0.141628	0.156301	-0.309806	-0.132041	0.108339	-0.16533	-0.40632	0.126975	0.0823861	0.0344244	-0.124705	0.30474	0.407981	0.056414	0.0304609	-0.150677	0.470596	0.30413
		208	0.365592	0.112468	0.55363	0.29906	1.02515	0.866016	0.271597	-0.549975	0.111023	-0.204299	1.61523	0.0473805	-0.17101	0.773465	-0.00899116	-0.387956	-0.0682989	-0.515241	-0.392337	-0.260671	-0.0133722	0.147202	-0.450153	-0.17101	-0.325758	0.0140912	-0.386511	-0.327203	0.138486	0.304886	0.30195	0.0850044	0.303395	0.462524	0.588318	-0.197029	0.203574	0.586873	0.620162	0.461033	0.931103	0.680915	0.81547	0.557965	0.244134	0.81258	0.686741
		209	0.36099	-0.11173	0.329432	0.0748621	0.472758	0.314835	0.375587	-0.775378	-0.0033774	-0.3187	0.846863	0.262374	0.372172	0.330877	0.752582	-0.0655749	0.36388	0.0267362	-0.506737	0.171508	0.311419	0.141394	-0.23757	-0.176818	-0.113175	-0.538296	-0.173928	-0.224418	-0.0845066	0.517469	0.407146	0.518389	0.518389	0.456716	0.475123	0.0155543	0.0903786	0.473678	0.944954	0.128242	0.819114	1.3351	1.35745	0.553362	0.895908	1.02516	0.679728
		210	0.107701	-0.0147853	-0.175537	-0.205713	0.0663439	0.28594	0.0950126	-0.776987	-0.0322722	-0.320309	0.0902146	0.00908541	0.118883	-0.0482521	0.373453	-0.193024	0.362271	-0.100713	-0.256666	0.0440591	0.309811	-0.111894	-0.239179	-0.205713	-0.14207	-0.0911166	0.0488571	-0.154759	-0.337795	-0.0147853	0.153857	0.39094	0.39094	0.176142	1.04814	-0.111894	0.187324	0.472069	0.691665	0.252473	0.916059	1.05453	1.17543	0.650307	0.839728	0.142675	-0.0769209
		211	-0.105099	-0.178049	-0.324695	0.0551955	-0.287847	0.00949736	0.164994	-0.388794	-0.223747	-0.137149	-0.0730487	0.269993	0.0687991	-0.557939	0.379791	-0.0594004	-0.260595	0.39344	0.0183476	0.128146	0.224295	-0.402443	-0.402443	-0.178049	0.366188	0.0920434	0.210692	-0.141201	-0.182847	-0.0225525	0.0824474	0.192245	0.114497	-0.100301	0.608983	0.375038	0.928826	0.00469935	0.302043	0.0183476	0.681933	1.71106	0.76448	0.508036	0.874278	-0.0914503	-0.622039
		212	0.408946	-0.095162	0.0835689	0.138082	0.230215	-0.0174139	0.138082	0.239065	-0.576035	-0.489437	-0.319556	-0.411688	-0.397304	-0.800429	-0.0863117	-0.411688	-0.722681	-0.178444	-0.00856362	-0.33394	0.0835689	-0.644933	-0.644933	-0.420539	0.449075	0.284728	-0.0317983	-0.273893	-0.644933	0.0603342	-0.489437	-0.16406	0.0835689	-0.342791	0.362476	0.132548	1.0077	-0.241808	-0.489437	0.316813	-0.109546	1.24094	0.192596	0.371326	0.192596	-0.00856362	0.0058208
		213	1.42142	0.134515	0.816841	0.0885583	1.01829	0.212263	0.0885583	0.134734	-0.625559	-0.314567	-0.423887	0.0423828	-0.222434	-0.90476	-0.190643	-0.51602	-0.827012	-0.282775	-0.112895	-0.438272	0.258439	-0.470063	-0.470063	-0.190861	0.399551	-0.268391	-0.0813223	-0.547811	-0.749264	0.0108102	-0.593768	-0.268391	-0.0207624	-0.392315	0.367759	0.307418	1.23737	0.212263	-0.314567	0.491683	-0.438272	2.30822	0.197879	0.601004	0.47708	-0.112895	-0.0985105
		214	1.29075	0.304329	1.35438	-0.197607	1.63358	0.527063	-0.197607	-0.374166	-0.522984	-0.522984	-0.476808	-0.243782	-0.197607	-0.57945	-0.0313392	-0.356716	-1.02492	-0.802185	-0.476808	-1.02492	-0.0949647	-0.745718	-0.745718	-0.0210479	-0.420341	-0.476808	-0.745718	-0.522984	-0.802185	-0.197607	-0.57945	-0.0313392	0.0713031	-0.0775147	0.304329	-0.522984	0.406971	-0.14114	-0.745718	0.350504	-0.133981	1.91278	-0.466517	0.527063	-0.187316	0.191395	0.516772
		215	0.776212	0.18165	0.647426	-0.57918	1.09922	0.318087	-0.233987	-0.563327	-0.320286	-0.492882	-0.167996	0.476704	-0.0613913	0.141036	0.191175	-0.326614	-0.735923	-0.167996	-0.254294	-0.390731	-0.629318	-0.456722	-0.284126	0.354246	-0.284126	-0.254294	-0.54302	-0.233987	-0.340593	0.0249068	-0.376752	0.622665	-0.117858	0.470376	0.872035	0.0249068	0.21781	-0.0912227	-0.370424	-0.0975511	0.759101	1.37842	-0.263819	0.576981	0.0153824	0.0687167	0.155015
		216	-0.141285	-0.23128	-0.0447055	-0.712909	0.127891	-0.0948438	-0.367717	-0.36402	-0.400179	-0.572776	0.0851463	0.0637738	-0.141285	0.286508	0.336647	-0.181142	-0.590451	-0.0225243	-0.108822	-0.245259	-0.763047	-0.590451	-0.417855	-0.058684	-0.417855	-0.108822	-0.622914	-0.367717	-0.19512	-0.108822	-0.23128	0.768137	0.0276141	0.336647	0.459105	-0.00115183	-0.141285	-0.504153	-0.504153	-0.12361	0.904573	0.127891	-0.676749	0.16405	-0.569079	0.214189	0.300487
		217	0.0617963	-0.410636	-0.669531	-0.988937	-0.337231	-0.656637	-0.324338	0.0617963	-0.197098	-0.529397	0.447931	0.266855	0.0617963	0.266855	0.253962	-0.583232	0.314474	0.0208542	0.413665	-0.138849	-0.81634	-0.484041	0.167664	-0.23804	-0.151742	0.413665	0.282011	-0.484041	0.00796102	0.0942591	-0.0912302	0.685453	0.327367	0.413665	0.91856	0.0422266	-0.0979067	-0.0783371	0.400772	0.335846	0.279748	-0.656637	-0.250933	-0.23804	-0.302966	-0.410636	-0.643744
		218	0.043753	-0.304462	-0.573816	-1.09524	-0.750805	-0.733519	-0.775831	-0.360278	-0.292939	-0.317965	-0.146739	-0.346774	-0.225601	0.32661	-0.389087	-0.371801	0.33435	-0.237124	-0.0947068	-0.127473	-0.55653	-0.66618	0.216959	-0.304462	-0.506477	0.03997	0.320847	-0.194811	-0.616128	-0.279436	0.0149439	0.0822823	0.241985	0.309324	0.469027	-0.0621147	-0.317965	-0.212098	0.199673	0.644036	-0.304462	-0.329488	-0.144759	-0.371801	-0.0621147	-0.84317	-1.22991
		219	-0.1141	-0.40848	-0.580736	-1.10216	-0.854823	-0.837537	-0.782752	-0.323936	-0.450793	-0.378721	-0.26133	-0.256597	-0.383454	0.610982	-0.396007	-0.281623	0.424527	-0.341142	-0.198725	-0.231491	-0.660548	-0.576003	0.112941	-0.40848	-0.610496	-0.0640482	0.162993	-0.29883	-0.525951	-0.286357	0.00802333	0.269557	0.623455	0.496599	0.656302	-0.176706	-0.0874282	-0.0248228	0.872436	1.40332	-0.311383	-0.142214	-0.054582	-0.281623	-0.273803	-0.947188	-1.33393
		220	-0.348458	-0.359438	-0.593543	-0.702785	-0.903635	-0.47417	-0.671861	-0.341823	-0.623302	-0.236906	-0.284299	-0.367258	-0.525039	0.438473	-0.635447	-0.139808	-0.0724696	-0.261175	-0.566943	-0.0227457	-0.199326	-0.398182	-0.157423	-0.421287	-0.592378	-0.586888	-0.457701	-0.213781	-0.69846	-0.397017	-0.293265	0.0610421	0.317086	0.437624	0.0665319	-0.0658147	-0.00746142	-0.135483	0.406364	0.751705	-0.26234	0.0356076	-0.134318	-0.0779594	-0.162912	-1.05277	-0.934559
		221	-0.253637	-0.250636	-0.45678	-0.122614	-0.43018	0.266075	-0.0916898	-0.446454	-0.795271	-0.0607655	-0.268233	-0.0564408	-0.522953	0.196602	-0.484704	-0.325757	0.157029	-0.0990153	-0.43018	-0.612725	-0.519953	0.154028	-0.371333	-0.433181	-0.402257	-0.464106	-0.522953	-0.857119	-0.238986	0.0878545	-0.305159	0.585291	0.237853	0.653142	-0.562825	-0.0916898	-0.314107	-0.0800396	0.408449	0.779188	-0.153538	-0.352357	-0.628999	0.0981808	-0.188787	-0.163865	-0.581801
		222	-0.0877712	-0.0847704	-0.388012	-0.324787	-0.264315	0.431941	0.248019	-0.745724	-0.629405	0.549885	-0.470406	-0.355711	-0.357088	-0.0259226	-0.686876	-0.625028	-0.142242	-0.204091	-0.535256	-0.717801	-0.625028	0.125698	0.0654741	-0.267315	0.0345498	-0.29824	-0.357088	-0.691254	-0.267315	0.156623	-0.507332	0.459864	-0.0817695	0.527714	-0.959194	-0.293863	0.00525001	-0.476408	-0.202466	-0.0259226	-0.0847704	-0.477784	-0.657328	0.611733	-0.293863	0.00200092	-0.415935
		223	0.134874	0.115851	-0.15096	-0.0788346	-0.15096	0.223757	0.285119	-0.56162	-0.671955	0.530641	-0.771363	-0.383855	-0.30347	-0.0938911	-0.720526	-0.745944	-0.136067	-0.136067	-0.574411	-0.618853	-0.517179	0.280989	0.164422	0.0968283	0.0881672	-0.208192	-0.328889	-0.214424	0.300175	0.611428	0.156326	0.573219	0.198502	0.382663	-0.656899	0.0228389	0.124111	-0.224949	-0.227215	0.287385	-0.138332	-0.22082	-0.538468	0.632315	-0.205926	0.00138702	-0.576677
		224	-0.251191	-0.149518	0.00519978	-0.344203	0.00519978	-0.223566	0.0197499	-0.344203	-0.454538	0.445408	-0.674642	-0.649224	-0.14731	-0.479956	-0.44367	-0.469088	-0.522132	-0.161861	-0.418251	-0.522132	-0.0601871	-0.045637	0.199886	-0.0478441	-0.0565052	-0.352865	-0.172729	0.00299266	0.155503	1.00534	0.371925	-0.174936	0.414101	-0.124099	-0.318785	0.117742	0.521663	-0.369622	-0.0710553	0.0814549	-0.403701	0.236172	0.159917	0.907353	-0.471295	-0.505375	-0.479956
		225	-0.383015	-0.281342	0.419851	-0.205086	-0.126624	-0.35539	-0.383015	0.341388	-0.0398872	0.864652	-0.535525	-0.510107	-0.279134	-0.0653056	-0.304553	-0.329971	-0.383015	-0.0227436	-0.279134	0.16346	0.0789299	-0.177461	-0.202879	-0.179668	-0.45927	0.0617863	0.241922	0.417643	0.570154	0.873521	1.05752	-0.30676	0.282277	-0.255923	-0.179668	0.256859	-0.152043	-0.230505	-0.202879	-0.050369	-0.535525	0.650823	0.0280932	0.780122	-0.332178	0.455751	-0.61178
		226	-0.451364	-0.451364	0.163379	-0.339497	-0.383096	-0.383096	0.107971	-0.128624	-0.0167568	0.821721	-0.451364	-0.451364	-0.271229	-0.0167568	-0.0474944	-0.494963	-0.451364	-0.426694	-0.159362	0.542579	0.0207742	-0.60683	-0.494963	-0.451364	-0.563232	-0.240491	0.163379	-0.128624	0.0951104	0.113713	0.455382	-0.786966	-0.0910929	-0.563232	-0.339497	0.244508	-0.159362	-0.22763	0.288107	0.399974	-0.451364	0.567249	0.132641	0.971119	-0.898833	0.417851	-0.115763
		227	-0.549996	-0.425905	-0.0326608	-0.314038	-0.579136	-0.206862	0.257522	-0.144528	0.174158	0.749772	-0.425905	-0.425905	-0.301813	0.132794	-0.0780791	-0.484184	-0.384541	-0.761506	-0.355401	0.774857	-0.396765	-0.678779	-0.691003	-0.26045	-0.537772	-0.215031	0.0500667	0.0209271	0.12057	-0.761506	0.0792063	-0.554687	-0.425905	-0.537772	-0.0244912	-0.0903032	-0.189946	-0.160807	0.257522	0.328026	-0.219086	0.315165	-0.160807	0.456172	-0.790646	0.650129	-0.00757571
		228	-0.290726	-0.0183991	-0.616338	-0.203004	-0.319866	-0.244065	0.22032	-0.728205	-0.40952	-0.232144	-0.166635	-0.463107	-0.339016	-0.450883	-0.115282	-0.521387	-0.421744	-0.798709	-0.392604	0.19118	-0.433968	-0.715981	-0.283497	-0.149416	-0.130266	-0.0575283	-0.237139	-0.414514	-0.463107	-0.650473	-0.504471	-0.59189	-0.463107	-0.574975	0.0865421	-0.127506	-0.227149	-0.198009	0.368556	0.735531	0.0401836	-0.268513	0.543171	0.0207301	-0.679612	0.705866	0.39993
		229	-0.112531	-0.197689	-0.683762	-0.494162	-0.387289	-0.311488	-0.160821	-0.505019	0.0592853	-0.232691	-0.345926	-0.463655	-0.518306	-0.518306	-0.518306	-0.2982	-0.422291	-0.463655	-0.505019	-0.0780936	-0.725125	-0.202185	-0.0603105	-0.328707	0.159796	0.277525	0.231666	-0.012585	-0.284912	0.0420664	-0.326276	-0.256836	-0.642398	-0.463655	-0.0258727	-0.642398	-0.518306	-0.601034	-0.37007	0.0637807	-0.139107	-0.202185	0.140147	-0.315419	-0.411434	0.929053	0.421266
		230	0.351627	0.142378	-0.80141	-0.653174	-0.172218	-0.80141	0.0551552	-0.123587	0.0675378	-0.308072	0.659583	0.209133	0.19675	0.19675	-0.30233	-0.123587	0.209133	0.0427727	-0.456308	0.554236	0.19675	0.221515	0.487481	-0.486814	0.998944	0.617593	0.19765	-0.295689	-0.277565	0.0494138	-0.277565	-0.456308	-0.46869	-0.289948	-0.141711	-0.30233	-0.63505	0.0303902	-0.653174	0.154761	-0.172218	-0.111205	0.27249	0.0246487	0.344986	0.563221	0.179526
		231	1.08524	0.199714	0.492699	-0.299366	-0.49469	0.492699	0.0291558	0.114435	0.0415383	0.309758	1.12918	0.711177	0.698794	0.170751	-0.32833	-0.149587	0.447155	0.280795	-0.218285	0.792258	0.170751	0.195516	0.808838	-0.133006	0.792258	0.378457	0.1392	-0.205903	0.224479	0.1392	-0.0395427	-0.482307	-0.49469	-0.0519253	-0.315947	0.199714	-0.397028	0.268412	-0.299366	0.476118	0.0333538	0.918883	0.0333538	-0.149587	0.434773	-0.384646	-0.291182
		232	0.786042	0.257999	0.550984	-0.286556	-0.299982	0.687406	-0.0881479	0.0849255	-0.345456	0.280249	1.32388	0.545245	0.711605	0.319984	-0.179096	-0.22457	0.326697	0.251286	-0.156846	0.765903	0.27451	0.0782122	0.688381	0.016227	0.584006	0.303473	-0.247795	-0.277732	0.0617012	-0.384217	-0.202321	-0.420868	-0.254508	-0.0814346	-0.16356	0.303473	-0.156846	0.554068	-0.195607	0.492083	0.31901	0.801579	0.273535	-0.133622	0.62948	0.722699	0.322255
		233	0.331128	-0.0487379	0.693935	-0.24239	-0.489752	0.780964	-0.345492	-0.0242408	-0.634011	0.306232	0.203528	-0.143605	-0.192997	-0.584618	-0.535226	-0.481915	-0.362152	-0.271204	-0.180256	0.108263	-0.5807	-0.394885	0.264676	0.140996	-0.271204	0.0955215	-0.221811	-0.0853889	0.137077	-0.259449	0.070626	-0.444277	-0.2961	-0.271204	-0.402722	-0.102049	-0.180256	-0.233567	0.0461289	0.252921	0.0304549	0.61181	0.083766	-0.292181	-0.22573	0.86565	0.36642
		234	-0.602401	-0.328867	-0.46183	-0.60609	-0.241837	-0.270337	-0.076685	0.00143737	-0.469667	-0.342382	-0.298837	-0.465519	-0.556697	-0.399382	-0.412667	-0.317571	-0.503616	-0.412667	-0.259041	0.0294779	-0.395464	-0.230541	-0.425723	-0.306275	-0.43356	-0.351749	-0.40506	-0.185067	-0.268408	-0.359127	0.0545188	-0.342612	-0.0899704	-0.412667	-0.321949	-0.486642	-0.321719	-0.333245	-0.296678	-0.312122	-0.228781	-0.259041	-0.196363	-0.169623	-0.367193	0.703294	0.447193
		235	-0.424941	-0.109891	-0.367402	-0.507704	-0.2008	-0.0632358	-0.122638	-0.119631	-0.590735	-0.131323	-0.299315	-0.491681	-0.416795	-0.52045	-0.367672	-0.310133	-0.367672	-0.201608	-0.34651	-0.0243911	-0.471057	-0.484073	-0.289779	-0.178247	-0.222501	-0.468859	-0.40158	-0.359526	-0.185854	-0.136192	0.4692	-0.222501	0.113173	0.0890037	-0.126722	-0.31314	-0.0770601	-0.00951216	0.333499	0.0195267	0.0534353	-0.0974139	-0.159284	-0.0870692	-0.0770601	-0.63766	-0.674306
		236	-0.339781	-0.0399346	-0.248053	-0.422543	-0.214425	0.105506	-0.102074	-0.380219	-0.106653	-0.0613662	-0.0811811	-0.239358	-0.381027	-0.484682	-0.248323	-0.422543	-0.115349	0.0507151	-0.227161	-0.235587	-0.484682	-0.414117	-0.00326742	-0.0741022	0.0298224	-0.497688	-0.464598	-0.422543	-0.298265	0.100927	0.292193	0.162796	0.0843438	0.474301	0.307967	-0.0114241	0.042289	0.47457	0.221089	0.188268	0.537518	0.0219352	-0.0399346	-0.298265	-0.090685	-0.651285	-0.589146
		237	-0.111661	-0.0779386	-0.108641	-0.423899	-0.299351	0.0935318	-0.0202029	-0.460008	-0.0610863	0.00509332	-0.0202029	-0.235576	-0.194693	-0.413086	-0.114048	-0.423899	-0.0279965	0.0911448	-0.296331	-0.398603	-0.553853	-0.509318	0.1519	-0.0857322	0.0442222	-0.509318	-0.476228	-0.470821	-0.35168	-0.0881192	0.0195764	0.271041	-0.00571982	0.32704	0.484028	0.0550354	-0.0580489	0.426292	0.19884	0.0773121	0.384776	0.0466093	-0.171784	-0.117067	-0.1441	-0.636885	-0.506931
		238	-0.266422	-0.327491	-0.153733	-0.507388	-0.427474	-0.14738	-0.133448	-0.433827	-0.0082677	-0.167665	0.132929	-0.167879	-0.266422	-0.280354	-0.0674668	-0.48075	-0.114604	-0.24144	-0.447974	-0.621517	-0.394484	-0.255157	0.198481	-0.335285	-0.261724	-0.441621	-0.601233	-0.527672	-0.654508	-0.296156	-0.455553	0.178196	-0.368061	-0.24288	0.251756	-0.0879662	-0.355355	0.0577135	-0.374199	-0.234872	-0.0221996	-0.141027	-0.26151	-0.206794	-0.361493	-0.447759	-0.427474
		239	-0.210153	-0.45787	-0.230438	-0.451119	-0.156509	-0.0630628	-0.210153	-0.377559	-0.189898	-0.0296735	0.00254969	-0.323884	-0.317502	-0.0630628	-0.25152	-0.370807	-0.324283	-0.397445	-0.524679	-0.672597	-0.499237	-0.492884	-0.197846	-0.652312	-0.417729	-0.410978	-0.544964	-0.364055	-0.544565	-0.692483	-0.532258	-0.218131	-0.49844	-0.692882	-0.198245	-0.404994	-0.539408	-0.28494	-0.31793	-0.257903	-0.418527	-0.325081	-0.445563	-0.150525	-0.305224	-0.552513	-0.532228
		240	-0.453699	-0.371026	-0.275363	-0.431126	-0.174441	-0.250689	-0.567474	-0.518262	-0.368527	-0.132452	-0.278921	-0.502512	-0.598972	-0.212764	-0.514996	-0.502512	-0.427062	-0.567075	-0.647387	-0.70146	-0.58402	-0.49282	-0.271698	-0.690173	-0.426663	-0.486763	-0.582824	-0.372989	-0.430727	-0.674423	-0.324575	-0.32091	-0.583223	-0.674822	-0.234172	-0.583622	-0.378648	-0.407647	-0.373786	-0.380611	-0.50331	-0.541633	-0.492422	-0.422998	-0.267236	-0.713145	-0.663934
		241	-0.559759	-0.340443	-0.40806	-0.400543	-0.307138	-0.353295	-0.590166	-0.597684	-0.474586	-0.261696	-0.651358	-0.498567	-0.705032	-0.398737	-0.697515	-0.498567	-0.476392	-0.536492	-0.673533	-0.780881	-0.796631	-0.591973	-0.287484	-0.65959	-0.422718	-0.482818	-0.552242	-0.369044	-0.430235	-0.560474	-0.233809	-0.530066	-0.689282	-0.780881	-0.553333	-0.742957	-0.424524	-0.673533	-0.476392	-0.619859	-0.522549	-0.780881	-0.538298	-0.635608	-0.559759	-0.539013	-0.213064
		242	0.00622623	0.457899	-0.378124	-0.191923	-0.313215	-0.48438	-0.56023	-0.74643	-0.605672	-0.267773	-0.567747	-0.700988	-0.74643	-0.708505	-0.738912	-0.522305	-0.446456	-0.56023	-0.822279	-0.822279	-0.426989	-0.579696	-0.382556	-0.700988	-0.625138	-0.738912	-0.700988	-0.625138	-0.632656	-0.655546	-0.203873	-0.625138	-0.784354	-0.822279	-0.416048	-0.784354	-0.465922	-0.822279	-0.625138	-0.643596	-0.617621	-0.822279	-0.401014	-0.605672	-0.708505	-0.169371	-0.0221046
		243	-0.0664799	0.283111	-0.558758	-0.165396	-0.380075	-0.519162	-0.562932	-0.649899	-0.602528	-0.38425	-0.646299	-0.697844	-0.69367	-0.562357	-0.522761	-0.387849	-0.344078	-0.387849	-0.73744	-0.649899	-0.336304	-0.570707	-0.443569	-0.697844	-0.566532	-0.697844	-0.741615	-0.610303	-0.606128	-0.351853	-0.00226159	-0.347678	-0.562357	-0.518586	-0.514987	-0.69367	-0.483165	-0.69367	-0.47899	-0.383674	-0.526936	-0.474815	-0.348253	-0.646299	-0.73744	-0.0903786	0.0248095
		244	-0.0709995	1.0672	0.1343	-0.0788876	0.138588	0.0905288	-0.127636	-0.828813	0.0905288	-0.297742	-0.650819	-0.785731	-0.523795	-0.218088	-0.610647	-0.65013	-0.25757	-0.475735	-0.74196	-0.480024	0.0079649	-0.567566	-0.698189	-0.785731	-0.654418	-0.960125	-0.829502	-0.698189	0.0869293	-0.348712	-0.0824872	-0.435564	-0.218088	-0.6975	-0.345112	0.173782	-0.30563	-0.698189	-0.392482	-0.562588	-0.698189	0.0438476	-0.345112	-0.30203	-0.218777	0.443606	-0.0400946
		245	-0.680444	0.279068	0.0496276	-0.353518	-0.113491	0.0509588	-0.201033	-0.6897	0.00585677	-0.561097	-0.746766	-0.680444	-0.44106	-0.124077	-0.527912	-0.6897	-0.29714	-0.50403	-0.580296	-0.363462	-0.232839	-0.451004	-0.615454	-0.69172	-0.492754	-0.821012	-0.679113	-0.581627	0.169665	-0.265976	-0.167159	-0.341553	-0.124077	-0.614765	-0.418509	0.256517	-0.222895	-0.615454	-0.287196	-0.64726	-0.536525	0.18296	-0.395958	-0.307774	-0.113491	0.417037	0.0330905
		246	-0.470974	0.145456	0.130147	-0.233951	0.0522085	0.34561	0.137389	-0.696722	0.130147	-0.222675	-0.663886	-0.726515	-0.233951	-0.218642	-0.663886	-0.611542	-0.262753	-0.0851505	-0.414597	-0.285304	-0.11091	-0.455665	-0.493525	-0.56743	-0.499777	-0.696722	-0.681413	-0.459699	0.204052	-0.489492	-0.478216	-0.65261	-0.303822	-0.83828	-0.29658	0.208085	-0.315098	-0.749066	-0.38176	-0.827005	-0.329416	0.086035	-0.274029	0.115828	0.0522085	0.541327	0.0284292
		247	-0.0517388	-0.508634	-0.349549	-0.492495	-0.152416	-0.234763	-0.26859	-0.304447	-0.550903	-0.380543	-0.0432963	-0.709989	-0.190464	0.0531597	-0.345328	-0.319944	0.0827649	0.334085	0.00463876	-0.0404633	-0.543849	-0.71421	-0.0742898	-0.450226	-0.0805416	-0.00241549	0.0398536	-0.0404633	-0.174967	-0.446005	-0.233375	-0.233375	-0.233375	-0.647359	-0.454447	-0.345328	-0.345328	-0.73254	-0.438951	-0.535407	-0.212212	-0.420621	-0.431896	0.186275	-0.454447	-0.112763	-0.276872
		248	0.330118	0.382911	0.0435834	-0.0880873	-0.0254033	-0.141577	-0.141577	0.0435834	-0.157771	-0.497099	-0.148577	-0.582976	-0.295744	0.701136	-0.195764	-0.481602	0.940484	0.415995	0.330118	0.0752739	-0.173268	-0.853317	0.0752739	-0.311938	-0.00990655	-0.164074	-0.13308	-0.17957	-0.280248	-0.041597	-0.349931	-0.349931	0.159757	-0.75264	-0.582279	-0.450608	-0.450608	-0.83782	-0.566782	-0.397118	-0.396422	-0.327435	-0.582279	-0.00920965	-0.582279	-0.211261	-0.551286
		249	0.299852	0.577902	0.0682131	-0.274198	-0.126334	-0.277213	-0.297403	0.0480231	-0.143236	-0.64283	-0.0387668	-0.408176	-0.471761	0.695481	-0.116239	-0.552248	0.849648	0.0248182	0.249377	-0.00546686	-0.233818	-0.743507	-0.00546686	-0.287308	0.0147232	-0.139444	0.0518153	-0.260311	-0.330703	0.0682131	-0.260311	-0.240121	0.269567	-0.64283	-0.673115	-0.350893	-0.360988	-0.64283	-0.562343	-0.307498	-0.552248	-0.408176	-0.652925	-0.240121	-0.64283	-0.206821	-0.481856
		250	0.0702976	0.452343	-0.154703	-0.195083	-0.449927	-0.204737	0.261862	-0.0775352	0.127275	-0.469676	-0.469676	-0.33238	-0.305245	0.264572	-0.147759	-0.577129	0.422058	-0.107379	-0.0775352	-0.137664	0.0400126	-0.0802448	-0.235022	-0.409547	-0.31219	-0.469676	-0.382413	-0.587224	-0.556939	-0.0573452	-0.587224	-0.372318	0.13737	-0.177603	-0.597319	-0.479771	-0.392508	-0.664392	-0.29515	-0.235022	-0.479771	-0.429737	-0.577129	-0.372318	-0.567034	-0.33238	-0.704772
		251	-0.25783	-0.444933	-0.482831	-0.642132	-0.523211	-0.337481	0.188579	-0.22728	-0.260313	-0.347576	-0.228654	-0.405663	-0.00476276	-0.258939	-0.339964	-0.336107	-0.475219	-0.240123	-0.524584	-0.329869	-0.0502718	0.0418555	-0.367766	-0.363909	-0.385473	-0.347576	-0.200852	-0.108359	-0.315917	-0.14763	-0.286741	-0.0718355	-0.131296	0.12288	-0.59414	-0.000906011	-0.389329	-0.42337	-0.232511	-0.308305	-0.29821	-0.205717	-0.276646	-0.131296	-0.14763	0.426788	0.24978
		252	-0.363027	-0.540992	-0.578889	-0.69781	-0.600035	-0.443634	0.123762	-0.324295	-0.367422	-0.46478	-0.324712	-0.418092	-0.0705358	-0.324712	-0.38459	-0.42207	-0.540992	-0.32513	-0.600452	-0.405737	-0.14633	-0.0542025	-0.46478	-0.459967	-0.502677	-0.443634	-0.286815	-0.205373	-0.443216	-0.243688	-0.383755	-0.18904	-0.227354	0.00567574	-0.681059	-0.108015	-0.486344	-0.540574	-0.329525	-0.405319	-0.384173	-0.302731	-0.383755	-0.248501	-0.264834	0.35092	0.194102
		253	0.272509	-0.0967492	-0.0372885	0.132441	-0.202761	0.0475765	-0.160468	-0.0243782	-0.695199	-0.117896	-0.122153	-0.262501	-0.207018	0.45515	-0.279389	-0.410805	-0.241075	-0.075603	-0.0118843	-0.444862	-0.0880968	-0.529726	0.459407	0.51461	0.663194	0.191902	0.68434	-0.0497823	-0.287625	-0.0880968	-0.37249	-0.37249	-0.266479	0.0604868	-0.236817	0.0945434	-0.525469	0.145352	-0.321682	-0.347086	-0.0372885	-0.194108	0.204813	-0.431951	-0.109243	0.362185	0.302724
		254	0.376741	-0.199406	-0.066231	0.0892458	-0.364878	0.0780947	-0.0562358	-0.364878	-0.531506	0.0457974	-0.210557	-0.158269	-0.488057	0.366746	-0.189411	0.166665	0.0557926	0.0880899	0.743968	-0.221708	-0.221708	-0.366034	0.6231	0.76627	0.900601	0.22242	0.788572	-0.242854	-0.109679	-0.221708	-0.38718	-0.653529	-0.354883	0.178972	0.312147	0.167821	0.0234952	-0.0762263	-0.0985284	-0.109679	0.200118	0.145519	0.0569484	-0.38718	0.0234952	-0.632383	-0.499208
		255	0.321026	-0.0145013	-0.0276425	0.127834	-0.378301	0.0435253	-0.0387936	-0.305143	-0.398613	0.251848	-0.171968	-0.183119	-0.303153	0.405335	-0.0256524	0.132096	0.0943811	0.105532	0.782557	-0.109961	-0.256277	-0.400603	0.755993	0.804859	0.887178	0.407325	0.754003	0.109512	0.0232133	-0.0368034	-0.327445	-0.593794	-0.389452	0.165549	0.371882	0.300714	0.0100721	0.349298	-0.0387936	0.0232133	0.165549	0.205254	0.189841	-0.327445	0.156388	-0.666952	-0.387462
		256	0.437114	-0.411454	0.377097	0.243922	0.170764	0.303939	-0.29142	0.243922	-0.218262	-0.145104	-0.424595	-0.29142	-0.411454	-0.424595	0.523413	0.16812	-0.158246	-0.29142	0.241278	-0.218262	-0.364578	-0.364578	-0.218262	-0.025071	0.570288	-0.278279	-0.364578	0.00121147	-0.0850877	0.656588	-0.29142	-0.55777	-0.497753	-0.231404	-0.025071	0.048087	-0.0982289	-0.19198	-0.29142	0.716604	-0.231404	0.241278	-0.351437	-0.29142	0.048087	-0.630928	-0.351437
		257	0.325462	-0.178986	0.320849	0.39862	0.247691	0.325462	-0.247532	0.39862	-0.174374	-0.256757	-0.325302	-0.325302	-0.178986	-0.169762	0.544935	-0.24292	-0.325302	-0.403072	-0.325302	-0.174374	-0.554001	-0.554001	-0.407685	-0.480843	0.247691	-0.334527	-0.24292	-0.188211	-0.407685	0.622706	-0.403072	-0.403072	-0.47623	-0.554001	-0.325302	-0.407685	-0.32069	0.0404876	-0.480843	0.394007	-0.39846	-0.325302	-0.174374	-0.480843	-0.329915	-0.32069	-0.329915
		258	0.465507	-0.429251	0.216901	0.465507	0.387737	0.80718	-0.00980775	0.465507	-0.35148	-0.336185	0.0832583	-0.258414	-0.087578	-0.27371	0.294671	-0.102874	-0.429251	0.00548804	-0.258414	0.161029	-0.584791	-0.413955	-0.243119	-0.413955	0.387737	-0.584791	-0.27371	-0.413955	-0.584791	0.372441	-0.507021	-0.507021	-0.507021	-0.584791	-0.429251	-0.413955	-0.35148	-0.429251	-0.413955	0.387737	-0.087578	-0.429251	-0.180644	-0.584791	-0.336185	0.502701	-0.165348
		259	-0.485021	-0.578087	-0.362732	-0.299573	0.179	0.227547	0.212252	-0.485021	0.426923	-0.114125	0.490766	0.334541	0.505377	-0.422546	-0.284961	-0.0662622	-0.207191	-0.143348	-0.407251	0.0121923	-0.733627	-0.377343	-0.391955	-0.377343	-0.562791	-0.733627	0.133797	-0.377343	-0.733627	-0.207191	-0.470409	-0.470409	-0.0995136	-0.733627	-0.578087	-0.00644758	0.0560269	-0.0217434	-0.191895	-0.00644758	-0.0509664	-0.578087	0.226863	0.00816394	-0.485021	0.910208	0.798502
		260	-0.477361	-0.760183	-0.389287	-0.291914	0.413743	0.0858937	0.176355	-0.440033	0.31637	-0.106466	0.569968	0.376415	0.509923	-0.498885	-0.351959	-0.142601	-0.351959	-0.135689	-0.51469	-0.173017	-0.685526	-0.36657	-0.343853	-0.36657	-0.552018	-0.872167	-0.166511	-0.441227	-0.648198	-0.277302	-0.276109	-0.276109	-0.0918543	-0.648198	-0.424228	0.153639	0.0201305	-0.0918543	-0.143794	0.228295	-0.0837491	-0.61087	0.190967	0.205578	-0.440033	1.24759	1.06746
		261	-0.6107	-0.722685	-0.49588	-0.425253	0.424494	-0.245028	-0.27191	-0.429282	0.497957	0.192465	0.0949561	0.531256	0.205747	-0.605477	-0.0262814	-0.420029	-0.458551	-0.6107	-0.792119	-0.503939	-0.648029	-0.0676393	-0.792119	-0.355819	-0.829447	-0.4024	0.0150765	-0.574566	-0.75479	-0.239805	0.0495686	-0.0945213	-0.198447	-0.46661	-0.530821	0.16439	0.201718	0.089733	-0.421223	0.239046	-0.243834	0.00298765	0.345808	0.531256	-0.429282	0.575001	0.907374
		262	-0.557239	-0.788937	-0.753456	-0.497382	-0.144122	-0.442748	-0.409773	-0.136393	-0.136393	0.174316	-0.288212	0.202068	-0.362868	-0.492159	-0.164144	-0.372445	-0.356987	-0.557239	-0.618943	-0.270906	-0.175568	-0.0799114	-0.618943	-0.427948	-0.596414	-0.169368	-0.607519	-0.526981	-0.701328	-0.497382	0.0372965	-0.346221	-0.581615	-0.353292	-0.237931	-0.218778	0.0579777	-0.173721	-0.259802	-0.0842648	-0.19625	0.295877	0.142211	0.202068	-0.19625	0.43126	0.267148
		263	-0.6792	-0.678542	-0.763433	-0.619343	-0.174653	-0.415396	-0.523347	-0.0549392	0.185804	0.172726	-0.318743	1.17184	-0.559486	-0.52269	0.149665	-0.523347	-0.404291	-0.558828	-0.342462	-0.47591	-0.0194585	-0.247587	-0.22209	-0.23451	-0.162233	0.173384	-0.654823	-0.258886	-0.582547	-0.619343	0.330551	-0.173338	-0.703576	-0.354881	0.017995	0.0660897	0.0647746	-0.0549392	-0.103691	0.00557524	0.125947	0.618073	0.269379	0.449607	0.00557524	0.425889	-0.116111
		264	-0.588272	-0.587614	-0.528415	-0.528415	-0.227815	-0.468558	-0.28833	-0.108101	0.132641	-0.168616	-0.227815	0.974584	-0.468558	-0.287672	-0.0475868	-0.28833	-0.169273	-0.4679	-0.107444	-0.529072	1.01565	-0.588929	0.0129277	-0.287672	0.0727846	-0.167958	-0.707985	-0.167958	-0.347529	0.41577	0.133299	0.717685	0.475627	-0.408043	0.253013	0.0129277	0.0116125	-0.108101	0.131326	-0.0475868	0.0727846	0.132641	0.072127	0.252355	0.896598	0.372727	-0.169273
		265	-0.352546	-0.232175	-0.581629	-0.581629	-0.111803	-0.581629	-0.461257	-0.340886	0.128939	-0.461257	-0.340886	0.622085	-0.352546	-0.340886	-0.220514	-0.461257	-0.123464	-0.461257	0.00856797	-0.243835	0.603299	-0.472918	-0.100143	-0.111803	-0.100143	-0.340886	-0.581629	-0.111803	0.117279	0.362556	0.249311	1.07312	0.591639	-0.00309236	0.249311	0.358022	-0.111803	-0.340886	0.346361	0.00856797	-0.100143	0.358022	0.00856797	0.128939	0.952753	0.249311	-0.123464
		266	-0.301777	-0.266338	-0.530859	-0.424542	-0.266338	-0.353663	-0.459981	-0.566299	-0.195459	-0.459981	-0.530859	-0.389103	-0.301777	-0.530859	-0.49542	-0.459981	-0.0018161	-0.49542	-0.301777	-0.0372553	0.555082	-0.230899	-0.424542	-0.301777	-0.353663	-0.530859	-0.353663	-0.337216	-0.0372553	0.519643	-0.337216	0.642408	0.713286	-0.0726945	-0.266338	-0.108134	-0.301777	-0.424542	0.156388	-0.230899	-0.459981	0.17538	-0.0537026	-0.195459	0.784165	-0.301777	-0.108134
		267	-0.267963	-0.420172	-0.121749	-0.0154317	-0.420172	-0.31985	-0.238519	-0.532485	0.0260025	-0.0508709	-0.497046	0.395304	-0.0803151	-0.497046	-0.461606	-0.238519	-0.155651	-0.461606	-0.455611	0.184207	-0.542937	-0.00943667	-0.0154317	0.294981	-0.31985	-0.121749	-0.31985	-0.303402	-0.19109	-0.390728	-0.303402	-0.267963	0.36586	-0.226529	-0.0448759	-0.07432	-0.0803151	0.547513	0.37785	-0.197085	-0.426167	0.0215453	0.355407	-0.161646	0.436738	-0.267963	-0.261968
		268	-0.286827	-0.562533	0.211966	0.0712903	-0.562533	0.137363	0.0951964	-0.198769	0.254132	0.159348	-0.0398335	0.358529	0.394808	-0.286827	0.119102	-0.275294	-0.156603	0.242599	-0.227482	0.0597572	-0.332718	0.0951964	0.441781	0.646608	0.0138658	-0.158524	0.137363	-0.56926	-0.315539	0.0664841	-0.322266	0.57765	0.346996	-0.227482	0.553744	-0.322266	-0.222675	0.634235	-0.469669	-0.586439	-0.339445	-0.596891	0.460041	-0.180509	0.788365	-0.657317	-0.880405
		269	0.203705	0.19838	0.549587	0.455504	-0.10744	-0.00803272	0.514849	0.174291	0.179615	0.12027	0.603608	0.707304	0.88534	0.662435	0.421284	-0.161461	-0.0427707	0.0860505	0.26305	0.82067	-0.442674	0.209029	0.673084	0.525498	0.0213808	-0.126723	0.603608	-0.349109	-0.472088	0.144878	-0.102116	0.762361	0.307918	-0.0427707	1.00884	0.0507943	-0.343785	0.559718	-0.284958	-0.319696	-0.225613	-0.660254	0.396677	-0.255026	0.678409	-0.319696	-0.660254
		270	0.0985831	0.280907	0.0691696	0.290402	-0.0249137	-0.113154	0.22208	0.384485	-0.113154	-0.360148	0.498487	-0.14841	0.59257	0.557314	0.316163	-0.454231	0.0397561	-0.0190709	0.345577	0.843216	-0.360148	-0.0837407	0.192666	-0.142568	-0.0837407	-0.607141	0.813802	-0.454231	-0.389561	0.670387	-0.207237	0.972555	0.270483	0.0397561	0.716067	0.260988	-0.636555	-0.483644	0.0529033	-0.109502	-0.330734	-0.577728	-0.0837407	-0.360148	0.0103426	-0.424817	-0.577728
		271	0.0706126	0.105318	-0.0822977	0.114813	0.341727	-0.388118	0.341727	0.233018	-0.659233	-0.388118	-0.0475921	-0.200502	0.0706126	0.529343	-0.0822977	-0.235208	0.035907	-0.541028	-0.200502	0.962863	-0.117003	0.307022	-0.0822977	-0.269913	0.035907	0.154112	1.35218	-0.235208	-0.812143	0.124308	0.307022	-0.191007	-0.0286021	-0.235208	-0.200502	-0.0380971	-0.812143	-0.659233	0.666538	0.775248	-0.235208	-0.235208	0.035907	-0.388118	-0.388118	0.188817	-0.235208
		272	-0.427301	-0.698416	-0.427301	-0.383101	-0.156186	-0.427301	-0.156186	-0.111986	-0.698416	0.101129	-0.698416	-0.698416	-0.427301	-0.427301	-0.163086	-0.163086	-0.156186	-0.427301	-0.434201	0.687559	-0.156186	0.114929	-0.163086	-0.156186	-0.156186	0.379144	0.965574	-0.163086	-0.698416	-0.0677851	0.643358	-0.118886	-0.0677851	-0.427301	-0.169986	-0.383101	-0.698416	-0.698416	0.73866	0.694459	-0.427301	-0.163086	0.372244	-0.427301	-0.427301	-0.156186	-0.427301
		273	-0.458311	-0.729426	-0.388769	-0.590342	-0.117654	-0.388769	-0.117654	-0.458311	-0.659884	0.0701188	-0.659884	-0.729426	-0.458311	-0.458311	-0.124554	-0.194096	-0.187196	-0.458311	-0.465211	0.341234	-0.117654	0.223003	-0.0550123	0.0214297	-0.117654	0.487218	0.966958	-0.124554	-0.5208	-0.590342	0.68189	-0.256585	-0.729426	-0.249685	-0.131454	-0.5208	-0.659884	-0.729426	0.146561	0.417676	-0.319227	-0.194096	0.341234	-0.388769	-0.458311	-0.0481123	-0.388769
		274	-0.423532	-0.321344	-0.251802	-0.284448	-0.35399	-0.35399	-0.149614	-0.52572	-0.558366	0.207086	-0.35399	-0.52572	-0.627908	-0.321344	-0.191963	-0.261505	-0.627908	-0.423532	-0.363693	0.00270963	-0.35399	-0.284448	-0.122421	-0.317094	-0.456178	-0.122421	-0.0159837	-0.191963	-0.317094	-0.386636	0.276628	0.151497	-0.0147794	-0.214906	0.17444	-0.112718	-0.35399	-0.321344	0.012413	0.421166	0.226493	-0.057129	0.309274	-0.35399	-0.52572	-0.284448	-0.456178
		275	-0.308137	-0.332291	-0.0732355	-0.358566	-0.364937	-0.364937	-0.223732	-0.473496	-0.632485	-0.332291	-0.238595	-0.473496	-0.702027	-0.332291	-0.530296	-0.410325	-0.638855	-0.434479	-0.512513	-0.473496	-0.428108	-0.105882	-0.460755	-0.138528	-0.403954	-0.271241	-0.101632	-0.467125	-0.328041	-0.397583	-0.32592	-0.123665	-0.0257265	-0.162682	-0.364937	-0.186836	-0.175424	-0.332291	-0.199578	0.146004	0.46823	-0.395462	-0.166932	-0.428108	-0.473496	-0.169053	-0.403954
		276	0.0533942	-0.206846	0.10071	0.21801	-0.190991	-0.190991	-0.403916	-0.466095	-0.694625	-0.206846	-0.182692	-0.466095	-0.812668	-0.0888032	-0.356351	0.0692493	-0.159281	-0.190991	0.0851043	-0.348052	-0.254162	-0.119521	-0.238307	-0.103666	-0.348052	-0.28488	-0.0878109	-0.411223	-0.293179	0.0609502	-0.0339311	-0.206846	0.0997181	-0.363907	-0.190991	0.0841121	0.234609	-0.206846	-0.143675	0.437993	0.808721	0.202155	-0.15953	-0.254162	-0.230008	-0.300735	-0.466095
		277	0.145334	-0.217095	-0.0998512	0.500263	0.471887	0.281574	-0.516352	-0.0816539	-0.778935	-0.407408	-0.0907525	-0.652593	-0.896978	-0.0990517	-0.733162	0.0730641	-0.243591	-0.289365	0.000794285	-0.344237	-0.162223	-0.0275814	0.336446	-0.0998512	0.0363893	0.289873	0.208505	-0.407408	-0.0990517	0.635704	0.146133	0.163531	0.163531	0.108659	-0.289365	-0.306762	-0.0540778	-0.407408	0.417015	-0.171321	0.00909341	0.0015938	-0.46228	-0.542849	-0.226194	0.362143	-0.0816539
		278	0.12208	-0.161551	-0.217973	0.634826	0.511583	0.352966	-0.334245	-0.10513	-0.612676	-0.320168	-0.145703	-0.612676	-0.778264	-0.0593561	-0.646143	-0.0135827	-0.203896	-0.233821	-0.0700043	-0.399409	-0.0435079	-0.177399	0.47101	-0.233821	0.0129137	0.187378	0.0428389	-0.383561	-0.0752043	0.691248	0.264848	0.219075	0.187378	0.11688	-0.217973	-0.219744	-0.172199	-0.30432	0.441084	-0.115778	-0.219744	0.0886123	-0.517452	-0.439982	-0.249669	0.259648	-0.0892813
		279	-0.206896	-0.198881	-0.317785	-0.0482797	0.30065	0.142033	-0.191048	-0.0244157	-0.587522	-0.413057	-0.0719116	-0.587522	-0.635067	-0.270289	-0.801516	-0.460602	-0.650915	-0.444754	-0.635067	-0.492298	-0.198881	-0.270289	0.197594	-0.389194	-0.0799761	0.205609	-0.286137	-0.47645	-0.286137	0.126185	-0.0641279	0.181746	0.0944888	0.197594	-0.317785	-0.555643	-0.619219	-0.341649	0.403755	-0.389194	-0.666763	-0.47645	-0.492298	-0.595355	-0.460602	0.284802	-0.0641279
		280	-0.550776	-0.501326	-0.347049	-0.292432	-0.5313	-0.499604	-0.493494	-0.47574	-0.509342	-0.400887	-0.332923	-0.509342	-0.556886	-0.572735	-0.40872	-0.614169	-0.5313	-0.515452	-0.432584	-0.562997	-0.459892	-0.5313	-0.485478	-0.501326	-0.5313	-0.311725	-0.339977	-0.547149	-0.547149	-0.474018	-0.432584	-0.501326	-0.505714	-0.444044	-0.305615	-0.270291	-0.375301	-0.329479	-0.345327	-0.377023	-0.46428	-0.422846	-0.480128	-0.558609	-0.572735	-0.0913713	-0.308281
		281	-0.602483	-0.505488	-0.367059	-0.312443	-0.519614	-0.519614	-0.561048	-0.464054	-0.561048	-0.436745	-0.352933	-0.561048	-0.561048	-0.561048	-0.381185	-0.602483	-0.455902	-0.519614	-0.436745	-0.519614	-0.464054	-0.519614	-0.505488	-0.505488	-0.519614	-0.28419	-0.248731	-0.519614	-0.455902	-0.414468	-0.436745	-0.505488	-0.47818	-0.464054	-0.261913	-0.242756	-0.395311	-0.381185	-0.381185	-0.381185	-0.436745	-0.3316	-0.436745	-0.546922	-0.561048	-0.0638368	-0.312443
		282	-0.59019	-0.486913	-0.342202	-0.30015	-0.507321	-0.445479	-0.486913	-0.507321	-0.486913	-0.486295	-0.507321	-0.610598	-0.363228	-0.548756	-0.424453	-0.652032	-0.505452	-0.445479	-0.300768	-0.445479	-0.321794	-0.383637	-0.425071	-0.486913	-0.569164	-0.506703	-0.174596	-0.569164	-0.505452	-0.464018	-0.424453	-0.548756	-0.28036	-0.445479	-0.360741	-0.341584	-0.444861	-0.548137	-0.486295	-0.486295	-0.238926	-0.442992	-0.177083	-0.59019	-0.548756	0.0721407	-0.0527803
		283	-0.457432	-0.416348	-0.354506	-0.519708	-0.436674	-0.39559	-0.354073	-0.478191	-0.457865	-0.623067	-0.478191	-0.623067	-0.375697	-0.498949	-0.498949	-0.602309	-0.49708	-0.457865	-0.43754	-0.478624	-0.230388	-0.333748	-0.354506	-0.437107	-0.540033	-0.664151	-0.352637	-0.58155	-0.559355	-0.538597	-0.581983	-0.581983	-0.334181	-0.437107	-0.393721	-0.436674	-0.540033	-0.664151	-0.623067	-0.540033	-0.334181	-0.496647	-0.25158	-0.478191	-0.457432	-0.375264	-0.272338
		284	-0.715993	-0.333045	-0.10027	-0.436404	-0.35337	-0.483218	-0.441701	-0.736751	-0.374562	-0.368831	-0.565819	-0.539763	-0.463326	-0.586578	-0.244713	-0.689937	-0.64842	-0.545494	-0.354236	-0.39532	0.0238477	-0.592308	-0.10027	-0.524735	-0.627662	-0.409915	-0.503977	-0.327314	-0.539763	-0.689937	-0.840544	-0.669611	-0.421809	-0.182871	-0.374129	-0.182438	-0.456729	-0.580847	-0.368831	-0.114865	0.0909877	-0.306123	0.344521	-0.0530226	-0.374129	-0.633825	-0.359967
		285	-0.73265	-0.411544	-0.152128	-0.408819	-0.414268	-0.561718	-0.564442	-0.79765	-0.497302	-0.367887	-0.582476	-0.494578	-0.709751	-0.603234	-0.305612	-0.644751	-0.603234	-0.579751	-0.494578	-0.518061	-0.222578	-0.776891	-0.19637	-0.647476	-0.626718	-0.302887	-0.582476	-0.32637	-0.538819	-0.644751	-0.901442	-0.686268	-0.53551	-0.26137	-0.346544	-0.199095	-0.455785	-0.341094	-0.323645	-0.0696793	-0.0669546	-0.243336	0.0362528	-0.0696793	-0.390785	-0.818408	-0.623993
		286	-0.645114	-0.303249	0.601035	-0.259008	-0.132535	-0.044269	-0.73338	-0.474399	-0.562447	-0.176559	-0.689138	-0.303249	-0.518423	-0.474182	-0.176559	-0.689138	-0.044269	-0.214984	-0.303249	-0.132535	0.0383975	0.17047	0.556793	-0.303467	-0.73338	0.297595	-0.044269	-0.391515	-0.562447	-0.474182	-0.904312	-0.689138	0.0442143	0.512552	-0.259008	-0.347273	-0.347491	-0.385481	-0.132317	0.253571	0.0828567	-0.176559	0.165306	0.683484	0.126663	-0.904312	-0.474182
		287	-0.100314	-0.338162	0.39519	0.0628509	-0.167447	0.567446	-0.240589	-0.167447	-0.59736	-0.501327	-0.790966	-0.457086	-0.620251	-0.457086	-0.501327	-0.553118	0.0917506	-0.0789641	-0.338162	0.189324	0.0704002	0.953117	0.469872	-0.0485235	-0.716284	-0.0271731	-0.146097	-0.716284	-0.59736	-0.457086	-0.59736	-0.434195	0.537005	0.425631	-0.174997	-0.553118	-0.501327	-0.539317	-0.457086	-0.361053	-0.531768	-0.620251	-0.620251	0.187783	-0.0271731	-0.716284	-0.457086
		288	0.521705	0.77347	1.41834	0.151015	0.74362	0.944658	-0.0639408	0.498813	-0.175906	-0.0798731	-0.65856	-0.0798731	0.290816	-0.0798731	-0.0798731	-0.665519	0.224157	0.74362	-0.205756	0.365972	0.491854	1.37457	0.31323	0.128124	-0.294829	-0.139573	-0.0136907	-0.539636	-0.665519	-0.32468	-0.665519	-0.301788	0.580928	0.558037	-0.331638	-0.665519	-0.569486	-0.050023	-0.569486	-0.228647	-0.68841	-0.443603	-0.68841	0.564996	0.594846	-0.294829	-0.0798731
		289	0.684034	0.659658	0.797729	0.865627	0.829064	0.400934	0.865627	0.308116	0.0633097	-0.0556141	-0.281274	-0.0556141	0.591216	0.0824565	0.220527	-0.426303	0.370786	0.690993	-0.319567	0.037204	0.163087	0.539005	-0.44545	0.0754976	-0.331755	-0.269086	-0.281274	-0.300421	-0.702444	-0.300421	-0.564374	0.213568	0.313345	-0.062573	-0.307379	-0.564374	-0.407156	0.189192	-0.407156	-0.695485	-0.802221	-0.419344	-0.664151	-0.0556141	0.189192	-0.193685	0.358598
		290	0.456118	0.669589	0.80766	0.518787	0.838995	-0.0648298	0.518787	0.318047	0.0732407	0.0732407	-0.0334951	0.0732407	0.838995	0.211311	0.349382	-0.416372	0.380717	0.700924	-0.309636	-0.309636	-0.0648298	0.0732407	-0.554443	-0.0334951	-0.2029	-0.140231	-0.0334951	-0.171566	-0.692513	-0.171566	-0.554443	0.104575	-0.0334951	-0.171566	-0.416372	-0.554443	-0.278302	0.318047	-0.278302	-0.447707	-0.554443	-0.171566	-0.416372	0.0732407	0.318047	-0.0648298	0.487452
		291	-0.119165	-0.395307	-0.257236	0.433117	0.0189051	-0.395307	0.433117	-0.257236	-0.257236	-0.257236	-0.119165	-0.257236	0.0189051	-0.119165	0.0189051	-0.257236	0.295046	-0.119165	-0.395307	-0.196375	-0.395307	-0.257236	-0.395307	-0.119165	-0.533377	0.0189051	-0.119165	-0.257236	-0.334446	-0.0583048	-0.395307	0.0189051	-0.119165	-0.257236	-0.257236	-0.395307	-0.119165	-0.257236	-0.119165	-0.334446	-0.395307	-0.257236	0.140626	-0.257236	-0.0583048	0.00255577	0.355907
		292	-0.350148	-0.502944	-0.0445553	-0.350148	-0.0445553	-0.350148	0.413834	0.261037	-0.350148	-0.0445553	-0.502944	-0.0445553	0.261037	-0.0445553	0.108241	0.108241	-0.350148	-0.197352	-0.0445553	0.00157953	-0.502944	-0.197352	-0.350148	-0.0445553	-0.350148	-0.197352	-0.197352	0.413834	-0.304013	-0.304013	-0.0445553	-0.502944	-0.350148	-0.502944	-0.197352	-0.350148	-0.502944	-0.197352	0.108241	0.154376	0.261037	-0.0445553	0.353307	0.413834	0.00157953	-0.105082	-0.304013
		293	-0.257865	-0.410661	0.246166	-0.0594267	-0.15071	-0.257865	0.704555	0.154883	-0.257865	0.643042	-0.609099	-0.15071	0.154883	-0.349147	0.200525	-0.196351	-0.257865	-0.105068	0.0477282	-0.303013	-0.807537	-0.501944	-0.0594267	-0.349147	-0.65474	-0.501944	-0.303506	0.307679	-0.410168	-0.410168	-0.349147	-0.807537	-0.456302	-0.609099	-0.501944	-0.456302	-0.807537	-0.501944	0.00208673	-0.150216	0.154883	-0.15071	0.0487149	0.307679	0.093863	-0.0127985	-0.0132919
		294	-0.215307	-0.440039	0.0729174	0.127002	-0.180087	-0.215307	1.03485	0.269376	-0.143371	0.82947	-0.566541	0.035719	-0.0183655	-0.522396	0.315018	-0.297664	-0.431113	-0.206381	0.0183505	-0.747128	-0.693043	-0.387451	-0.232675	-0.162719	-0.684118	-0.675192	-0.0451419	0.206366	-0.494605	-0.854283	-0.378525	-0.764979	-0.126003	-0.350735	-0.24358	-0.48568	-0.549172	-0.531322	0.0446445	-0.234654	0.125505	-0.108152	-0.450461	0.709914	-0.134446	-0.00842582	0.190012
		295	-0.140953	-0.248856	-0.167006	0.37251	-0.546513	-0.140953	0.588317	-0.330706	-0.0330495	0.967824	-0.438609	-0.222803	-0.762319	-1.05998	-0.0330495	-0.952073	-0.464662	-0.356759	-0.248856	-1.16788	-0.628363	-0.628363	-0.167006	-0.52046	-0.844169	-1.05998	-0.1149	-0.654416	-0.330706	-0.870222	-0.844169	-0.736266	-0.0069967	-0.1149	-0.412557	-0.546513	-0.412557	-0.844169	-0.438609	-0.628363	-0.546513	-0.438609	-0.952073	0.100906	-0.248856	0.398563	0.69622
	Z-scored event-related firing rate in the pVLS at the ealry stage
			Time bin
			1	2	3	4	5	6	7	8	9	10	11	12	13	14	15	16	17	18	19	20	21	22	23	24	25	26	27	28	29	30	31	32	33	34	35	36	37	38	39	40	41	42	43	44	45	46	47
	# of neurons	1	4.37783	3.48899	-0.403236	-0.403236	0.4856	2.60016	1.37444	0.4856	0.4856	0.4856	-0.403236	-0.403236	-0.403236	0.4856	0.4856	-0.403236	-0.403236	-0.403236	-0.403236	0.4856	-0.403236	-0.403236	0.4856	-0.403236	-0.403236	-0.403236	0.4856	-0.403236	-0.403236	0.4856	0.4856	-0.403236	-0.403236	-0.403236	0.4856	-0.403236	-0.403236	-0.403236	-0.403236	0.4856	-0.403236	1.71132	2.60016	-0.403236	-0.403236	-0.403236	-0.403236
		2	3.95561	2.32146	-0.0418964	-0.0418964	1.24506	2.0761	1.14322	0.319195	0.319195	0.550661	-0.0418964	-0.15763	-0.273363	0.319195	0.434928	-0.504829	-0.0418964	-0.389096	0.305303	0.434928	0.18957	0.18957	0.666395	0.421037	0.768236	0.305303	1.24506	-0.273363	0.305303	0.434928	0.203462	-0.15763	0.18957	-0.273363	0.666395	-0.15763	0.18957	0.0738368	-0.0418964	0.782128	0.18957	1.59928	2.19183	-0.15763	-0.0418964	-0.504829	-0.504829
		3	3.85515	1.08891	0.255599	0.945456	0.949998	2.12597	0.600527	0.369061	0.369061	0.945456	0.255599	0.139865	-0.320797	-0.320797	-0.205063	0.482523	-0.0893301	-0.091601	0.602798	0.139865	1.17692	0.831994	0.371332	1.06346	1.06573	0.947727	1.29493	-0.320797	0.602798	0.139865	-0.43653	0.139865	0.142136	-0.320797	0.0264031	0.139865	0.142136	0.716261	0.255599	0.142136	0.142136	1.55184	2.2417	0.139865	0.600527	-0.207334	0.137595
		4	2.52837	-0.237873	0.338523	1.02838	1.03292	0.799184	0.683451	0.451985	0.451985	1.02838	0.338523	0.222789	-0.237873	-0.237873	-0.122139	0.565447	-0.00640626	-0.00867719	0.685722	0.222789	1.25985	0.914918	0.454256	1.14638	1.14866	1.03065	1.37785	-0.237873	0.685722	0.222789	-0.353606	0.222789	0.22506	-0.237873	0.109327	0.222789	0.22506	0.799184	0.338523	0.22506	0.22506	0.22506	0.914918	0.222789	0.683451	-0.12441	0.220518
		5	1.49131	-0.233334	0.111595	0.801452	0.111595	0.456523	0.456523	0.456523	0.456523	0.801452	0.111595	0.111595	-0.233334	-0.233334	-0.233334	0.801452	-0.233334	0.111595	0.111595	0.111595	0.801452	0.456523	0.111595	0.456523	0.111595	0.456523	0.456523	-0.233334	0.111595	0.111595	-0.233334	0.111595	-0.233334	-0.233334	-0.233334	0.111595	-0.233334	0.456523	0.111595	-0.233334	-0.233334	-0.233334	0.456523	0.111595	0.456523	0.111595	0.456523
		6	-0.0330049	3.3335	-0.0330049	-0.0330049	-0.0330049	-0.0330049	-0.0330049	-0.0330049	-0.0330049	-0.0330049	-0.0330049	-0.0330049	-0.0330049	-0.0330049	-0.0330049	-0.0330049	-0.0330049	-0.0330049	-0.0330049	-0.0330049	-0.0330049	-0.0330049	-0.0330049	-0.0330049	-0.0330049	-0.0330049	-0.0330049	-0.0330049	-0.0330049	-0.0330049	-0.0330049	-0.0330049	-0.0330049	-0.0330049	-0.0330049	-0.0330049	-0.0330049	-0.0330049	-0.0330049	-0.0330049	-0.0330049	-0.0330049	-0.0330049	-0.0330049	-0.0330049	-0.0330049	-0.0330049
		7	0.95377	4.89215	-0.189992	-0.189992	0.381889	0.381889	-0.189992	-0.189992	0.381889	0.95377	0.381889	-0.189992	-0.189992	0.381889	-0.189992	0.381889	-0.189992	-0.189992	-0.189992	0.381889	-0.189992	-0.189992	-0.189992	-0.189992	-0.189992	-0.189992	-0.189992	0.381889	-0.189992	-0.189992	-0.189992	0.95377	-0.189992	-0.189992	-0.189992	0.95377	0.381889	-0.189992	-0.189992	-0.189992	0.381889	-0.189992	-0.189992	-0.189992	0.381889	-0.189992	-0.189992
		8	0.792793	6.13857	-0.350969	-0.350969	0.690045	0.690045	0.587297	-0.350969	0.690045	0.792793	0.220912	-0.350969	-0.350969	0.220912	0.118164	0.220912	-0.350969	-0.350969	0.118164	1.15918	-0.350969	1.05643	0.118164	-0.350969	0.118164	-0.350969	1.05643	0.220912	-0.350969	-0.350969	-0.350969	0.792793	0.118164	0.118164	-0.350969	0.792793	0.220912	0.587297	-0.350969	-0.350969	0.690045	-0.350969	0.118164	0.118164	0.220912	-0.350969	-0.350969
		9	1.87617	4.43457	-0.42584	-0.42584	1.1943	1.1943	0.512426	-0.42584	0.615174	0.717922	1.30429	0.153284	0.153284	0.146041	0.622417	0.146041	1.31153	0.732408	0.622417	1.66343	-0.42584	0.981559	0.0432932	-0.42584	0.0432932	-0.42584	0.981559	0.146041	-0.42584	-0.42584	-0.42584	0.717922	0.0432932	0.0432932	-0.42584	0.717922	0.146041	0.512426	-0.42584	-0.42584	0.615174	-0.42584	0.0432932	0.0432932	0.146041	-0.42584	-0.42584
		10	1.34525	3.66872	0.636259	0.074693	1.01064	0.898324	0.900646	-0.37456	-0.130053	-0.0376201	1.34525	0.0922511	0.316877	-0.0376201	1.12295	-0.37456	1.69975	1.23294	0.673697	1.36746	-0.37456	1.14515	0.543826	-0.262246	0.3192	-0.0376201	1.25747	-0.149933	-0.37456	-0.486873	-0.486873	-0.37456	-0.0177395	-0.0177395	-0.486873	-0.486873	-0.486873	0.788333	-0.599186	-0.0376201	0.206887	-0.599186	0.206887	-0.0177395	-0.0376201	-0.599186	-0.486873
		11	1.36278	2.27884	2.11697	0.092221	1.04676	0.934445	-0.0200922	-0.357032	-0.581658	0.955362	1.36278	0.109779	0.334405	-0.0200922	0.671345	-0.357032	2.69273	1.25047	0.222092	0.934445	-0.357032	-0.244718	0.092221	0.730735	-0.132405	-0.0200922	0.843049	0.843049	-0.357032	0.506109	0.993836	-0.357032	0.0183822	-0.469345	-0.469345	-0.469345	-0.469345	0.355322	-0.581658	-0.0200922	-0.244718	-0.581658	-0.244718	0.0183822	-0.0200922	-0.581658	-0.469345
		12	0.295486	1.12565	2.70115	0.429787	1.79166	0.692887	-0.175755	0.227148	-0.737321	1.04631	0.788714	-0.131779	0.0928473	1.05732	1.16963	-0.0194658	1.29293	0.429787	-0.0194658	0.199659	-0.0194658	0.0928473	0.183172	1.0683	-0.288068	-0.175755	0.687386	1.18061	-0.0194658	1.09029	1.3314	0.473763	0.109334	-0.131779	-0.131779	-0.378393	-0.625007	0.446273	-0.244092	0.564088	0.339462	-0.244092	0.0928473	1.09579	0.317474	-0.490706	-0.625007
		13	-0.214721	0.278508	1.74169	0.0318936	1.50608	3.29132	-0.461335	0.278508	0.924516	0.760733	0.278508	0.0318936	0.0318936	0.771736	0.771736	0.0318936	1.00735	0.0318936	0.0318936	0.026392	0.0318936	0.0318936	1.17113	1.00735	-0.461335	-0.461335	0.514119	1.00735	0.0318936	1.25396	1.49507	0.525122	0.273006	0.0318936	0.0318936	-0.214721	-0.461335	0.273006	0.0318936	0.278508	0.278508	0.0318936	0.0318936	1.25946	0.0318936	-0.214721	-0.461335
		14	0.222301	1.2675	1.2675	0.7449	1.86935	3.93058	0.251671	0.715529	1.49953	0.498285	1.12951	0.468915	0.0549375	1.07077	0.932773	0.330922	0.468915	0.330922	0.0549375	-0.162306	-0.083055	0.468915	1.05618	0.0549375	-0.300299	-0.300299	-0.576283	0.468915	0.330922	0.163559	-0.083055	0.548166	-0.191677	0.468915	0.606907	0.0843081	0.251671	0.912263	0.19293	0.577537	0.991514	0.468915	1.02088	1.07077	0.330922	-0.0536843	-0.300299
		15	0.765042	1.18019	0.769733	0.493748	0.90538	4.2267	1.38308	0.491402	1.60479	0.630568	0.70015	0.491402	0.282655	0.35341	0.420647	-0.193869	0.149353	0.21659	0.0774251	0.21659	-0.0605674	0.217763	1.4621	0.0774251	0.147008	0.147008	-0.128977	-0.192696	0.285	-0.0605674	-0.402616	0.145835	-0.264624	0.149353	1.17667	0.21659	0.425338	1.24977	0.352237	-0.125459	0.425338	0.217763	0.974962	0.42182	0.0797707	-0.53709	-0.331861
		16	0.487422	0.902572	0.733975	0.45799	0.869622	1.17738	1.83104	1.42309	-0.0586833	0.352948	1.14811	0.455644	0.730619	0.0757906	0.62675	-0.229627	-0.128266	-0.061029	0.041667	-0.061029	0.145536	0.423866	0.0404942	-0.200194	0.11125	0.11125	-0.406597	-0.228454	0.491103	-0.338187	-0.438375	0.351938	-0.300382	0.113595	1.62464	0.422694	1.11516	1.9396	0.0746178	0.0806445	0.631441	1.14945	0.697343	0.1442	0.0440126	-0.330987	-0.60948
		17	0.102829	0.894421	-0.202588	0.725824	0.0710514	0.102829	1.17046	1.0385	1.27555	1.54919	0.349545	0.0710514	0.760003	-0.17081	0.518142	-0.476227	-0.512859	-0.307629	0.0710514	-0.307629	0.312913	0.0392734	0.207871	-0.17081	0.00264163	0.00264163	0.689192	-0.613047	0.244503	-0.17081	-0.270998	0.381323	-0.270998	-0.270998	1.10205	0.176093	1.383	0.865045	-0.0339902	-0.165956	0.899275	0.764857	-0.23922	0.826011	-0.202588	-0.439595	-0.718088
		18	-0.604552	0.666815	0.666177	1.59459	-0.0197348	-0.604552	0.121032	1.97658	1.59523	2.96705	0.806944	-0.362691	1.1499	-0.261596	0.222126	0.323221	-0.261596	0.08136	-0.0197348	-0.261596	-0.12083	0.222126	-0.0197348	-0.261596	0.323221	-0.362691	0.666815	-0.0197348	-0.12083	0.08136	0.666177	0.222126	-0.0197348	0.323221	0.463988	0.222126	1.2913	0.362893	-0.604552	-0.12083	0.807582	0.604754	-0.604552	0.323859	-0.0197348	-0.12083	-0.604552
		19	-0.35733	0.914038	0.671538	2.46434	-0.0143738	-0.35733	-0.35733	1.01449	1.84245	4.07866	2.92175	0.507061	1.53593	-0.0143738	-0.0143738	0.328582	-0.0143738	0.328582	-0.0143738	-0.0143738	-0.35733	-0.0143738	-0.0143738	-0.0143738	0.328582	-0.35733	1.77843	-0.0143738	-0.35733	0.328582	0.671538	-0.0143738	-0.0143738	0.328582	-0.0143738	-0.0143738	0.571082	-0.35733	-0.35733	-0.35733	0.571082	-0.35733	0.507061	0.571082	-0.0143738	-0.35733	-0.35733
		20	-0.238712	0.212512	1.22323	1.97935	0.104245	-0.0221761	0.0860916	1.45792	0.212512	2.55699	3.14864	1.60009	1.87108	0.104245	0.32078	0.880271	-0.00402317	0.447201	0.32078	-0.112291	-0.563515	0.645583	0.104245	0.429048	0.555468	-0.130444	1.0769	-0.220559	-0.238712	0.880271	1.3315	0.32078	0.32078	0.555468	0.429048	0.537315	-0.0221761	0.410895	-0.238712	-0.238712	-0.238712	-0.130444	0.950482	-0.78005	0.537315	-0.563515	-0.78005
		21	0.259062	-0.128874	0.195929	0.952052	-0.237142	-0.0206065	0.583865	0.0876612	0.367329	0.843784	3.45671	3.58647	1.33999	0.259062	-0.0206065	0.692132	0.150794	-0.237142	-0.0206065	0.0425261	-0.0657416	0.8004	0.259062	0.583865	-0.128874	-0.128874	1.23172	0.430462	0.259062	0.195929	0.304197	-0.0206065	1.468	-0.128874	0.583865	0.692132	0.475597	0.412464	0.259062	-0.237142	-0.237142	-0.128874	0.952052	-0.77848	0.195929	-0.561945	-0.77848
		22	0.204945	0.650171	0.974974	0.866707	-0.291258	0.758439	0.529749	0.0335452	0.313213	-0.0747225	0.809417	2.66797	0.421481	0.204945	1.5916	0.638016	0.0966777	-0.291258	0.758439	-0.01159	-0.119858	0.746284	1.03811	0.529749	0.650171	0.650171	0.313213	0.376346	1.03811	0.141813	0.250081	0.758439	1.41389	-0.18299	0.529749	0.638016	0.421481	0.358348	0.204945	-0.291258	-0.291258	0.650171	0.0335452	-0.832596	0.141813	-0.616061	0.000564997
		23	0.543325	0.880283	1.2612	0.118453	0.23758	1.07074	0.352868	-0.524251	0.543325	0.23758	1.03953	2.03194	-0.0280478	0.16241	1.33253	1.1147	0.733783	0.428037	0.880283	0.733783	0.543325	0.352868	0.995571	0.543325	0.880283	0.499368	0.16241	1.03953	0.614656	0.23758	-0.524251	0.689826	1.15482	-0.333793	0.543325	0.16241	-0.0280478	0.0471219	-0.0280478	-0.524251	-0.143336	0.30891	-0.143336	-0.524251	-0.524251	0.0471219	0.499368
		24	0.0935825	0.926744	1.30766	0.164913	0.28404	1.7658	-0.0968752	-0.477791	0.0935825	0.28404	0.0935825	0.0935825	-0.477791	0.361265	1.37899	0.664956	2.22983	1.1231	1.57534	0.932638	0.0935825	-0.0968752	0.545829	0.0935825	0.926744	1.19443	-0.287333	0.0935825	0.164913	0.932638	-0.477791	1.38488	-0.287333	-0.287333	0.0935825	-0.287333	-0.477791	0.0935825	-0.477791	-0.477791	-0.0968752	1.65257	0.551722	0.170807	-0.477791	0.0935825	0.545829
		25	0.199438	0.199438	0.580353	-0.562393	0.389896	1.03849	0.00898015	-0.371935	0.199438	0.389896	0.199438	0.199438	-0.371935	0.46712	-0.181478	0.770811	2.33569	1.22895	0.848035	4.40499	0.199438	0.00898015	-0.181478	0.199438	0.199438	0.46712	-0.181478	0.199438	-0.562393	1.03849	-0.371935	0.657578	-0.181478	-0.181478	0.199438	-0.181478	-0.371935	0.199438	-0.371935	-0.371935	0.00898015	0.92526	0.657578	0.276662	-0.371935	0.199438	-0.181478
		26	-0.297705	-0.297705	-0.297705	-0.297705	0.371238	0.518128	0.0367666	0.0367666	0.0367666	0.538474	-0.297705	0.0367666	0.204002	0.183657	-0.297705	-0.464941	2.48427	0.0164208	0.685364	3.88463	-0.130469	0.371238	1.04018	0.0367666	0.371238	0.183657	0.0367666	0.371238	-0.130469	0.350892	-0.297705	0.350892	0.371238	0.0367666	0.0367666	0.0367666	0.371238	0.204002	0.204002	0.371238	0.0367666	1.83567	0.685364	1.18707	-0.464941	0.0367666	-0.130469
		27	-0.480337	-0.480337	-0.0355231	-0.480337	0.188606	0.35412	0.0765415	0.298949	-0.145865	0.578249	-0.480337	0.298949	0.466184	-0.647573	-0.25793	-0.425166	0.578249	-0.147588	0.743763	3.72062	0.576527	0.855827	1.30236	1.41098	1.30064	-0.202759	0.96617	0.855827	-0.0906943	-0.480337	-0.25793	-0.25793	0.411013	0.0765415	0.298949	0.0765415	0.188606	0.0213703	0.688591	1.07823	0.521356	0.578249	0.521356	0.355842	0.464462	0.521356	-0.0906943
		28	-0.556332	-0.556332	0.316097	-0.128717	0.112611	0.278125	0.000546698	0.222954	-0.22186	0.502254	-0.556332	0.222954	0.39019	-0.295953	-0.333925	0.354068	0.929869	0.631646	0.667768	1.56097	0.500532	1.20745	1.65398	3.90068	1.22465	-0.278754	1.31779	1.63506	-0.166689	-0.128717	-0.333925	-0.333925	0.335018	0.000546698	0.222954	0.000546698	0.112611	-0.0546245	0.612597	1.00224	0.445361	0.502254	0.445361	0.279847	0.816082	0.445361	-0.166689
		29	-0.696335	-0.563995	0.176093	-0.13638	-0.696335	-0.0291143	-0.209247	0.0131601	-0.696335	-0.341588	-0.166972	0.0131601	0.145501	-0.401062	-0.473928	0.910663	-0.178655	1.62016	0.325633	1.65075	0.060952	0.530841	0.573115	3.95556	0.151018	-0.251521	2.03438	0.826115	-0.606269	-0.00403943	-0.473928	0.187775	-0.606269	-0.0769062	-0.119181	-0.473928	-0.431654	-0.563995	0.235567	0.325633	-0.0291143	-0.0769062	0.235567	-0.696335	0.843314	0.235567	-0.341588
		30	-0.469005	0.0186806	0.136282	0.268623	-0.291332	0.0640122	-0.0266509	-0.204323	-0.291332	-0.336664	0.0603582	-0.204323	-0.0719825	-0.173731	-0.291332	0.915587	0.00394138	1.18027	-0.158992	1.21086	-0.423673	0.0909505	0.710976	2.62604	-0.733686	0.0640122	1.32735	3.40665	0.642361	0.400964	-0.291332	0.192699	-0.423673	0.10569	-0.158992	-0.469005	-0.0266509	-0.336664	-0.204323	-0.336664	-0.469005	-0.0719825	-0.204323	-0.291332	-0.0413902	-0.204323	-0.336664
		31	-0.443004	0.145466	-0.0637628	-0.132991	-0.0637628	0.291582	0.100134	-0.178322	-0.0637628	-0.109094	0.287928	0.527168	0.357156	-0.47456	-0.164547	0.489496	-0.0953192	0.754178	0.370931	0.357156	-0.196104	-0.310663	0.510932	0.691065	-0.00219487	0.190797	1.32887	3.78684	1.37385	0.402487	0.339374	1.02497	0.106249	0.333259	-0.0322064	-0.241435	0.301703	0.797965	0.325599	-0.109094	0.161702	0.861077	0.124031	0.137806	-0.241435	0.325599	-0.310663
		32	0.398329	0.250232	0.475457	-0.0282245	0.324401	0.981858	0.525729	-0.205897	0.77757	0.448841	0.448841	0.499594	0.348297	0.499113	0.525729	0.65041	0.576241	0.499353	0.626754	0.801466	0.475457	0.247272	0.502073	0.700922	1.10382	0.276848	0.525969	4.77923	1.59224	0.828082	1.33176	0.600378	0.77781	0.324401	0.223616	0.297785	1.02941	1.3559	0.751194	0.448841	0.398809	1.45644	0.700682	0.828082	-0.155384	0.449081	-0.356953
		33	0.426774	0.43666	0.582893	-0.177452	0.431837	0.220622	0.376501	-0.434116	0.371678	0.73395	0.477286	0.271374	0.120078	0.270894	0.376501	0.935518	0.17035	0.271134	0.220862	1.34324	0.0695656	0.275717	0.175173	0.472703	1.13226	-0.484388	0.376742	2.55723	0.633646	0.935518	2.72252	0.372159	0.628582	0.175173	0.0743886	0.0695656	1.13685	1.38434	0.522975	0.220622	0.683918	1.48489	0.729126	0.678854	0.386388	0.477526	1.21147
		34	0.90506	0.597392	0.209299	-0.349478	0.275013	0.0637985	0.103691	-0.389371	-0.00191597	0.577126	0.320462	-0.389371	-0.238314	0.431626	0.320462	0.577126	0.129513	0.779825	-0.238314	0.768075	-0.0872579	0.320462	0.0183495	-0.0872579	0.254748	0.326656	0.885433	2.04288	0.406442	1.44421	2.37933	0.260942	1.47003	0.451891	1.1022	-0.0872579	1.31278	0.320462	0.280569	0.0637985	-0.0928139	0.622575	0.90506	1.18755	0.229564	0.0183495	1.25622
		35	0.632144	1.39515	-0.227955	-0.484619	0.921717	-0.524512	-0.484619	0.874839	-0.741282	0.455266	-0.267848	-0.524512	-0.524512	-0.307741	0.198603	-0.0111839	-0.307741	0.342572	-0.0580612	0.495159	-0.524512	0.198603	-0.267848	-0.524512	-0.484619	0.342572	0.599236	2.08536	0.422358	0.855899	1.95536	0.125801	1.49923	2.0315	0.816007	0.408389	0.422358	-0.267848	-0.307741	-0.524512	0.238496	-0.267848	0.632144	0.599236	0.24548	-0.267848	1.27214
		36	0.836167	1.08585	0.115362	-0.280596	1.26503	-0.0638247	0.115362	1.33553	0.115362	0.00666833	-0.459782	-0.0638247	-0.0638247	0.548903	0.402626	0.332133	0.152946	1.19922	0.00666833	0.185855	0.332133	1.19454	-0.0638247	-0.0638247	-0.676553	0.803259	0.803259	1.12343	-0.0262403	0.407301	0.619396	0.982445	1.30729	2.23552	1.02003	2.05695	0.369717	0.332133	0.548903	0.332133	0.185855	-0.459782	0.44021	0.407301	-0.0638247	0.332133	-0.459782
		37	0.913838	1.12092	1.10271	-0.0713412	1.77625	0.447388	0.843345	1.58737	0.0652514	0.258516	-0.207934	-0.0713412	-0.330706	0.324616	0.654474	0.583981	0.447388	0.583981	0.258516	0.135744	0.324616	1.18702	-0.330706	-0.0713412	-0.726663	-0.330706	-0.330706	0.206237	-0.207934	-0.467299	0.135744	0.583981	-0.260213	1.79446	0.188023	3.34625	-0.330706	0.583981	0.0652514	0.843345	0.654474	-0.207934	-0.000848223	-0.467299	-0.330706	0.324616	0.0514308
		38	0.583586	0.324221	1.23891	0.0648564	0.979543	0.583586	0.979543	0.324221	0.201449	-0.0717362	-0.0717362	0.0648564	-0.194508	0.460814	0.324221	0.720178	0.583586	0.720178	-0.0717362	-0.194508	0.460814	0.856771	-0.194508	0.0648564	-0.590466	-0.194508	-0.194508	-0.590466	-0.0717362	-0.331101	-0.194508	0.720178	-0.590466	0.0648564	0.324221	5.91605	-0.194508	0.720178	0.201449	0.979543	0.324221	-0.0717362	-0.331101	-0.331101	-0.194508	0.460814	0.187628
		39	0.96596	0.0753884	0.594118	1.07844	0.96596	0.334753	0.334753	0.0753884	0.187866	0.0753884	0.0753884	-0.183976	-0.443341	-0.183976	0.0753884	0.0753884	0.334753	0.0753884	0.0753884	-0.443341	-0.183976	-0.183976	-0.443341	0.447231	-0.443341	-0.443341	-0.443341	-0.443341	0.0753884	-0.183976	-0.443341	0.0753884	0.819073	1.07844	0.0753884	4.47935	0.187866	1.96901	0.819073	0.334753	0.0753884	0.0753884	-0.183976	-0.183976	-0.443341	-0.183976	0.334753
		40	0.390478	-0.240728	-0.240728	1.02169	0.390478	-0.240728	-0.240728	-0.240728	0.390478	0.563678	-0.240728	-0.240728	-0.240728	-0.240728	-0.240728	-0.240728	-0.240728	-0.240728	-0.240728	-0.240728	0.563678	-0.240728	-0.240728	0.390478	-0.240728	-0.240728	-0.240728	-0.240728	-0.240728	-0.240728	-0.240728	-0.240728	1.02169	1.02169	-0.240728	3.12577	1.19488	1.65289	2.6305	0.563678	0.563678	0.563678	0.563678	1.36808	-0.240728	-0.240728	-0.240728
		41	0.436631	-0.194576	-0.362206	0.900208	0.436631	-0.194576	-0.0269467	0.308312	0.60426	0.945089	-0.194576	0.140683	-0.194576	0.308312	-0.0269467	-0.0269467	-0.194576	-0.194576	-0.194576	0.140683	0.60983	-0.194576	-0.194576	0.939519	0.475942	-0.0269467	-0.194576	0.308312	0.475942	0.475942	0.643571	0.140683	1.57073	1.4031	-0.362206	-0.0269467	1.24104	2.0343	3.68243	1.78324	1.28035	0.442201	0.60983	1.7495	-0.0269467	-0.362206	-0.362206
		42	-0.263527	-0.263527	-0.0449927	-0.0449927	0.122637	-0.263527	-0.095898	0.625525	-0.095898	1.64847	0.122637	0.457896	0.122637	0.239361	-0.095898	0.67643	0.122637	0.122637	-0.263527	0.84406	0.540879	-0.263527	-0.263527	0.239361	0.793155	-0.095898	-0.263527	1.39785	0.793155	0.40699	1.34695	0.0717314	0.239361	0.457896	-0.0449927	0.67643	0.927043	0.0717314	2.35106	1.71429	1.98373	2.69023	0.540879	2.06671	-0.095898	-0.431157	-0.431157
		43	-0.345062	0.0915376	-0.126527	-0.126527	0.0411026	0.0915376	-0.177432	0.98059	-0.177432	0.762526	0.0411026	1.24956	0.0411026	1.03103	0.695766	0.594896	0.0411026	0.0411026	-0.345062	0.762526	-0.345062	-0.345062	-0.345062	0.157827	0.71162	-0.177432	-0.345062	1.31632	0.71162	0.325456	1.26541	0.863396	0.594426	0.812961	-0.126527	0.594896	0.477702	0.426797	1.53391	0.828345	1.09778	2.24089	0.0915376	0.376361	0.259167	-0.512691	1.23371
		44	-0.578697	-0.142098	-0.0175151	-0.192533	-0.105024	-0.142098	-0.491188	0.419084	-0.578697	0.28114	-0.105024	0.768174	-0.105024	0.469519	0.294501	0.456158	-0.192533	0.0699938	-0.403679	0.28114	-0.403679	-0.228662	-0.578697	-0.491188	-0.105024	-0.491188	-0.491188	0.842322	-0.192533	-0.403679	0.28114	0.294501	-0.054589	0.331575	-0.105024	0.193631	0.331575	-0.054589	0.294501	-0.578697	0.456158	2.2624	-0.142098	-0.105024	-0.054589	0.558919	2.04279
		45	-0.56196	-0.125361	-0.386943	-0.56196	-0.474451	-0.125361	-0.474451	0.0496568	-0.56196	-0.474451	-0.474451	0.93396	-0.474451	0.486256	0.846451	-0.299434	-0.56196	-0.299434	-0.386943	-0.474451	-0.386943	-0.211925	-0.56196	-0.474451	-0.474451	0.0607617	-0.474451	0.23578	-0.56196	0.148271	-0.474451	0.846451	-0.0378522	-0.0378522	-0.474451	-0.0267472	-0.0378522	-0.0378522	0.311238	-0.56196	0.23578	0.497361	0.409852	-0.474451	0.497361	1.11087	2.59474
		46	-0.83156	-0.83156	0.213795	-0.251335	-0.453939	-0.83156	-0.308882	-0.511486	-0.396391	-0.453939	-0.308882	0.371387	-0.744051	-0.801598	-0.441403	-0.569033	-0.251335	0.301304	-0.801598	-0.308882	0.0687388	0.0987005	-0.541447	-0.0187702	0.271342	-0.0637815	-0.453939	0.401349	-0.396391	0.31384	-0.598995	0.719046	-0.889107	-0.453939	0.126286	-0.00623432	-0.163826	-0.598995	-0.83156	-0.396391	0.256292	-0.0637815	0.428934	-0.0187702	-0.0637815	0.696213	1.30402
		47	-0.769627	-0.109517	0.100709	0.25067	-0.479515	-0.219536	0.325651	0.145557	-0.00440399	-0.369497	-0.334459	0.235792	-0.769627	-0.914684	0.170621	-0.659609	-0.0793846	0.320746	-0.584628	-0.444477	-0.0443468	0.0306338	-0.369497	-0.0443468	0.355784	0.130679	0.0705766	0.420791	-0.334459	0.200754	-0.624571	0.890997	-0.804665	-0.0394418	0.210728	0.275735	0.140652	-0.404535	-0.769627	-0.444477	0.385753	-0.0893581	0.380848	-0.154365	-0.199376	0.28064	0.710903
		48	-0.694883	-0.0548976	0.23583	0.426041	-0.223644	-0.104541	0.440646	0.361178	0.231342	-0.0532506	-0.239589	-0.164301	-0.654632	-0.839939	-0.269722	-0.363488	0.0154854	0.435741	-0.449508	-0.389858	0.0102729	0.0450033	-0.335002	0.0102729	0.470779	-0.249289	0.145321	-0.0598026	-0.219464	-0.32009	-0.449201	0.490904	-0.589045	0.0956784	0.285473	-0.0841081	0.255647	-0.309665	-0.513757	-0.369733	-0.0143399	-0.429076	0.282632	0.0411304	-0.518969	0.504425	0.954814
		49	-0.36144	0.278545	-0.301064	0.179259	-0.180314	0.228902	0.338921	0.549564	0.129616	-0.0099201	-0.341315	-0.411083	0.49626	-0.36144	0.208777	-0.0300452	-0.231296	-0.101153	0.0289906	0.325866	-0.381565	-0.201778	-0.291672	-0.381565	-0.211171	-0.0609026	1.0061	0.655921	-0.32119	-0.421815	-0.260814	-0.191046	-0.110546	0.139009	-0.251421	-0.0407775	0.00886548	-0.121278	-0.180314	-0.471458	0.84644	-0.240689	-0.109206	-0.350707	0.486867	0.982924	0.562976
		50	-0.0901644	-0.231741	-0.0702728	-0.475344	-0.556779	-0.373784	-0.252333	-0.111224	-0.414969	0.191821	-0.596329	-0.475111	0.6056	-0.211616	-0.191491	-0.476045	-0.515361	-0.252333	-0.029789	0.38329	0.0516457	-0.514894	-0.130415	-0.353192	-0.0903979	-0.374018	1.05116	0.626192	0.0715372	-0.191023	-0.0705064	0.132146	0.0102276	0.0106948	0.031287	0.21288	-0.171366	-0.272458	0.0909616	-0.00919678	0.747177	-0.2528	-0.0112989	-0.293284	0.422839	0.553606	0.452279
		51	-0.0967498	-0.218201	-0.195222	-0.524567	-0.802479	-0.478608	-0.299169	-0.142709	-0.582555	0.00172213	-0.565051	-0.542071	0.616752	-0.160213	-0.334177	-0.646019	-0.542071	-0.299169	-0.154738	0.454817	0.123174	-0.519092	-0.154738	-0.165688	-0.25321	-0.519092	1.16055	0.523756	0.140678	-0.0212573	-0.177717	-0.0507908	-0.195222	0.117698	0.0247016	0.105669	-0.218201	-0.299169	-0.0387617	0.0422059	0.738204	-0.0901957	-0.380136	-0.42062	0.21739	0.616612	0.495161
		52	-0.229709	-0.17549	-0.15251	-0.657527	-0.759767	-0.348062	-0.432128	-0.187833	-0.627679	-0.0434019	-0.434504	-0.587196	-0.157985	-0.0296663	-0.115795	-0.691143	-0.411525	-0.432128	0.32715	-0.232085	-0.00978587	-0.564216	-0.287697	-0.298648	-0.210498	-0.652051	0.297973	-0.250982	0.0955538	-0.154217	-0.310677	-0.0959149	-0.240346	-0.015261	-0.108258	0.148381	-0.17549	-0.344293	-0.0838857	-0.00291809	0.0513013	-0.13532	-0.42526	-0.553579	-0.557348	1.44984	0.801378
		53	-0.554124	-0.271026	-0.436441	-0.496135	-0.382727	-0.241178	-0.50041	-0.350312	-0.466288	-0.354586	-0.232629	-0.466288	-0.266751	-0.232629	-0.211331	-0.4083	-0.18319	-0.554124	0.0564495	-0.125202	-0.442422	-0.416849	-0.612112	-0.380159	-0.440715	-0.612112	-0.135458	-0.333288	-0.350312	-0.33072	-0.50041	-0.36741	-0.363135	-0.219018	-0.50041	-0.163598	-0.271026	-0.412575	-0.247159	-0.354586	-0.125202	-0.176348	-0.358861	-0.554124	-0.2753	1.81047	1.01489
		54	-0.61213	-0.468114	-0.366919	-0.61213	-0.382746	-0.241197	-0.488876	-0.559066	-0.489525	-0.470581	-0.313854	-0.559066	-0.487057	-0.279083	-0.118591	-0.593836	-0.275968	-0.61213	0.195513	-0.241197	-0.593187	-0.451638	-0.716442	-0.61213	-0.278435	-0.61213	-0.2399	0.281008	-0.489525	-0.574244	-0.349794	-0.309441	-0.432695	-0.381449	-0.593187	-0.221605	-0.15518	-0.296729	-0.189302	-0.470581	-0.275968	-0.385213	-0.416868	-0.61213	0.0376152	1.34633	0.620287
		55	-0.639575	-0.67123	-0.570035	-0.520808	-0.229559	-0.294613	-0.160018	-0.674346	-0.486037	-0.467094	-0.36727	-0.555578	-0.33387	-0.570035	-0.497378	-0.590349	-0.448151	-0.639575	-0.328012	-0.532148	-0.620632	-0.566919	-0.743887	-0.520808	-0.48155	-0.520808	-0.236413	0.434195	-0.486037	-0.601689	-0.377239	-0.305953	-0.429208	-0.052591	-0.620632	-0.424721	-0.358296	-0.293242	-0.304582	-0.348327	-0.210616	-0.381726	-0.413381	-0.520808	-0.165501	0.827763	0.985038
		56	0.280234	-0.652559	-0.443936	-0.394709	-0.157174	-0.275942	-0.0876332	-0.548247	-0.359939	-0.394709	-0.241171	-0.42948	-0.261485	-0.443936	-0.478706	-0.46425	-0.42948	0.280234	-0.255627	-0.513477	-0.548247	-0.548247	-0.617788	-0.394709	-0.409165	-0.394709	-0.325168	0.399153	-0.359939	-0.583018	-0.304854	-0.394709	0.32946	0.706077	-0.548247	1.07394	-0.339625	0.572853	-0.339625	-0.275942	-0.191945	-0.255627	0.399001	-0.394709	-0.200543	0.309298	0.735142
		57	0.100657	-0.813843	0.0316786	0.0296574	0.267193	-0.33473	0.0256151	-0.209899	-0.21192	-0.21192	0.0276363	-0.453498	0.387981	-0.451476	-0.0891102	0.0296574	-0.332709	0.7046	0.150446	-0.209899	-0.572265	-0.0891102	-0.693054	-0.21192	-0.330688	-0.0911313	0.0296574	-0.45754	-0.453498	-0.451476	0.0316786	-0.453498	0.58179	0.698537	-0.813843	0.894367	-0.451476	0.340213	-0.209899	-0.0931525	-0.215962	-0.332709	0.340213	-0.0911313	-0.451476	-0.0971948	0.379897
		58	0.303405	-0.4889	0.234427	0.480222	0.235833	-0.369517	-0.0057446	-0.129345	-0.0057446	-0.127939	0.115044	-0.369517	0.234427	-0.370923	-0.00855647	-0.00855647	-0.126533	1.15174	0.234427	-0.129345	-0.491711	-0.00855647	-0.6125	-0.250134	-0.127939	-0.129345	0.113638	-0.733289	-0.491711	-0.370923	0.234427	-0.247322	0.543576	0.544982	-0.366705	1.21931	-0.370923	0.424194	-0.129345	-0.127939	-0.00293272	-0.126533	0.790778	0.115044	-0.248728	-0.491711	-0.370923
		59	-0.460053	-0.438268	0.183162	0.551233	0.388361	-0.257747	0.044887	-0.0379549	0.00412828	-0.0569283	0.206434	-0.257747	0.346197	-0.279532	0.0216958	-0.019063	-0.11666	0.408659	0.183162	-0.18061	-0.542977	-0.0598217	-0.623007	-0.26064	-0.199584	-0.241749	0.062373	-0.804933	-0.624494	-0.462947	0.142403	-0.380105	-0.342158	-0.279614	-0.41797	-0.317479	-0.442567	-0.420782	-0.160231	-0.199584	-0.0745773	-0.238937	-0.135715	0.0841583	-0.157338	-0.624494	-0.503705
		60	-0.278192	-0.135618	-0.145393	0.12915	-0.0337214	0.0176422	-0.135618	-0.124932	-0.176377	-0.237434	0.119458	0.0176422	-0.196675	-0.339249	-0.400387	-0.441146	-0.176377	-0.0134236	-0.35971	-0.481904	-0.481904	-0.267587	-0.441146	-0.441146	-0.380089	-0.543043	-0.35971	-0.502284	-0.349105	-0.522663	-0.400469	-0.104716	-0.522663	-0.33933	-0.11532	0.0786988	-0.502284	-0.35971	-0.461525	-0.380089	0.200812	-0.298653	-0.0746432	-0.217136	-0.217054	-0.563422	0.0795293
		61	0.0171209	0.0375002	0.0130113	-0.0790296	-0.134421	0.176046	-0.373227	0.429485	0.544378	0.194789	0.0187576	0.586774	0.235548	-0.0586502	0.0171209	0.250181	-0.00325849	-0.099409	0.0725126	-0.475124	-0.0643966	0.14992	-0.0236379	-0.0236379	-0.495504	-0.125535	0.0725126	0.189042	-0.0685062	-0.105155	-0.378974	0.068403	-0.242065	-0.0440172	-0.338215	0.114908	0.0521332	-0.338215	0.36671	-0.358594	0.26645	-0.262444	-0.145914	-0.0440172	0.215168	-0.693551	-0.0505997
		62	-0.208554	-0.208554	0.139268	0.465781	-0.279562	0.274476	-0.754489	0.210276	0.609497	0.401581	0.002359	0.752807	0.401581	-0.00744519	-0.208554	0.132868	0.399879	-0.345464	0.19877	-0.416471	0.332275	0.00576271	-0.073347	0.264671	-0.281264	0.332275	-0.0716452	0.673697	0.815305	-0.00574334	-0.279562	0.478988	0.398177	-0.00574334	-0.279562	-0.131147	0.604392	-0.211958	0.472588	0.193664	0.345483	0.195366	0.0618603	-0.140951	0.333977	-0.418173	0.359986
		63	0.594773	-0.26066	-0.127155	0.841391	-0.331668	0.00805244	-0.806595	-0.0561475	0.557391	0.349475	-0.264064	0.486384	0.349475	-0.0595512	-0.26066	0.0807617	0.347773	-0.39757	0.146664	-0.468577	0.707886	-0.26066	-0.125453	0.212565	-0.33337	0.280169	-0.123751	1.04931	1.40432	0.369868	-0.331668	0.212565	0.773788	-0.0578494	-0.331668	-0.39757	0.980003	0.59137	0.420482	0.141558	0.506777	0.570977	0.00975429	-0.193057	0.281871	-0.470279	-0.335072
		64	0.356281	-0.737703	-0.348013	0.620533	-0.415617	-0.332081	-0.87291	-0.550824	-0.109463	-0.264477	-0.348013	-0.0259272	-0.145202	-0.399685	-0.737703	-0.550824	0.10928	-0.737703	-0.467288	-0.534892	0.350118	-0.737703	-0.483221	-0.145202	-0.399685	-0.0775986	-0.737703	0.298447	1.18346	-0.107175	-0.534892	-0.145202	0.433654	-0.415617	-0.415617	-0.737703	0.485326	0.745971	-0.467288	-0.0616663	-0.107175	0.230843	-0.348013	-0.550824	-0.212806	-0.28041	-0.145202
		65	0.78558	-0.156398	-0.265131	0.466597	-0.189129	-0.0803947	-0.308404	-0.113126	-0.102584	-0.612415	-0.189129	-0.0698535	-0.645146	-0.612415	-0.612415	-0.645146	-0.373865	-0.612415	-0.460409	-0.688418	-0.0654234	-0.688418	-0.417137	-0.569143	-0.764421	-0.265131	-0.460409	0.195316	0.362294	0.119313	-0.612415	-0.49314	-0.108695	-0.645146	-0.113126	-0.612415	0.314591	1.13286	-0.384407	-0.688418	-0.260701	-0.0326925	-0.0371227	0.114883	-0.265131	-0.569143	-0.417137
		66	0.470594	-0.0957167	-0.204451	0.0995612	-0.128448	0.460053	0.232044	-0.0524447	-0.0419035	-0.551734	-0.128448	-0.00917259	-0.584465	-0.551734	-0.551734	-0.584465	0.646349	-0.551734	0.0800384	-0.14797	-0.432459	-0.627737	-0.356456	-0.508462	-0.223973	-0.204451	-0.399729	0.308047	0.527074	-0.247723	-0.551734	-0.432459	-0.475731	-0.584465	-0.0524447	-0.551734	-0.0524447	0.338111	-0.323726	-0.14797	-0.627737	-0.399729	0.0235583	1.1351	-0.204451	-0.508462	-0.356456
		67	0.461035	-0.008636	-0.094735	0.351187	-0.160642	0.547134	0.602945	-0.0846389	-0.312648	-0.464654	-0.160642	-0.160642	-0.61666	-0.180834	-0.322744	-0.19093	0.49488	-0.322744	0.167119	0.0810201	-0.322744	-0.398747	-0.246741	-0.398747	-0.136893	0.0471748	-0.312648	0.395128	0.49488	-0.0187321	-0.464654	-0.180834	-0.388651	-0.61666	0.199181	0.386805	-0.0846389	0.0673669	-0.236645	-0.0608897	-0.540657	-0.312648	-0.008636	1.24481	-0.236645	-0.540657	-0.104831
		68	0.21389	-0.422275	-0.280365	-0.152944	-0.422275	0.0574919	0.326823	-0.436764	-0.436764	-0.407786	-0.422275	-0.436764	-0.436764	-0.152944	-0.294854	0.00345449	0.52277	-0.294854	0.0574919	0.184913	-0.294854	-0.280365	-0.251388	-0.265876	0.0574919	-0.152944	-0.422275	0.0430032	0.537259	-0.280365	-0.393298	-0.152944	-0.407786	-0.436764	-0.152944	0.414695	-0.436764	-0.436764	-0.436764	0.0574919	-0.436764	-0.436764	-0.422275	0.66468	-0.436764	-0.436764	-0.152944
		69	-0.224489	-0.404354	-0.262444	-0.111557	-0.404354	-0.357421	-0.135023	-0.418843	-0.418843	-0.389865	-0.404354	-0.418843	-0.418843	-0.135023	-0.276933	0.0213754	-0.418843	-0.276933	-0.404354	-0.276933	-0.276933	-0.238978	-0.233467	-0.247956	-0.404354	-0.135023	-0.404354	-0.418843	-0.404354	-0.238978	-0.375377	-0.135023	-0.389865	-0.418843	-0.135023	0.432616	-0.418843	-0.418843	-0.418843	-0.404354	-0.418843	-0.418843	-0.404354	-0.276933	-0.418843	-0.418843	-0.135023
		70	-0.307518	-0.334059	-0.345473	-0.319374	-0.334059	-0.309954	-0.359962	-0.377083	-0.337134	-0.30245	-0.334059	-0.371376	-0.377083	-0.38279	-0.359962	-0.368302	-0.371376	-0.348548	-0.351181	-0.371376	-0.359962	-0.333421	-0.322203	-0.308157	-0.362595	-0.38279	-0.339766	-0.377083	-0.345473	-0.339128	-0.333617	-0.377083	-0.325278	-0.388497	-0.38279	-0.388497	-0.377083	-0.388497	-0.377083	-0.362595	-0.371376	-0.377083	-0.356888	-0.38279	-0.388497	-0.388497	-0.388497
		71	-0.0610932	-0.107007	-0.287726	-0.179416	-0.0900762	-0.167554	-0.0506989	-0.135542	-0.0955927	-0.0560246	0.0115067	-0.129835	-0.186333	-0.17511	-0.152282	-0.208971	-0.214487	-0.0392848	-0.174919	-0.248348	-0.135351	-0.106368	-0.107197	-0.0448012	-0.186333	-0.208971	-0.248158	-0.338708	-0.135351	-0.129006	-0.152472	-0.203264	-0.248158	-0.163886	-0.293623	-0.265469	-0.169403	-0.163886	-0.101681	-0.152472	-0.180626	-0.169403	-0.028252	-0.141249	-0.0623036	-0.231608	-0.197747
		72	0.0267551	-0.361288	-0.542007	-0.0915677	0.0212387	0.262423	-0.30498	-0.389823	0.0157222	0.420886	0.488417	0.712672	-0.0750185	-0.429391	-0.0409669	-0.097656	-0.468768	0.437626	-0.0636044	-0.137033	-0.389632	-0.01852	0.369713	0.0665137	-0.440614	-0.463252	0.228753	-0.227393	0.341559	-0.406753	-0.0411575	0.273647	-0.136843	0.313024	-0.182308	0.211441	-0.423684	-0.0525716	-0.355962	0.690034	-0.434907	-0.058088	0.0830629	0.335662	0.414607	0.610898	0.279163
		73	0.0252758	-0.374181	-0.543486	-0.110168	0.00834527	0.272358	-0.306459	-0.374181	-0.00858521	0.390872	0.475524	0.722606	-0.0593767	-0.408042	-0.0424462	-0.0763071	-0.458833	0.424733	-0.0593767	-0.127099	-0.391111	-0.00858521	0.373941	0.0422062	-0.424972	-0.441903	0.221567	-0.211751	0.809755	-0.391111	-0.0255157	0.289289	0.325646	0.34008	-0.16096	0.238497	-0.408042	0.44416	-0.34032	0.705676	-0.424972	-0.0424462	0.0929977	1.29636	0.441663	0.637954	0.306219
		74	-0.195719	-0.724146	-0.0728201	-0.0328873	-0.195719	0.332708	-0.561315	-0.398483	-0.35855	0.00704544	0.169877	0.698304	-0.195719	-0.724146	-0.0328873	-0.195719	-0.561315	0.00704544	-0.195719	-0.195719	-0.398483	0.129944	0.49554	0.455607	-0.561315	-0.561315	0.169877	-0.195719	0.802384	-0.398483	-0.195719	0.169877	0.599619	0.169877	-0.195719	0.169877	-0.0728201	0.762451	-0.561315	0.535473	-0.561315	-0.0328873	-0.195719	1.10923	0.49554	0.372641	0.00704544
		75	-0.331693	-0.494525	0.199493	-0.168862	-0.331693	-0.12617	-0.289002	-0.168862	-0.494525	-0.494525	-0.24631	-0.168862	-0.24631	-0.451833	-0.0834783	-0.331693	-0.289002	-0.494525	-0.331693	-0.331693	-0.168862	0.0366614	0.0366614	0.362324	-0.331693	-0.289002	-0.331693	-0.331693	0.343505	-0.12617	-0.331693	-0.289002	0.549028	-0.331693	-0.331693	-0.331693	0.156801	0.669168	-0.331693	-0.331693	-0.331693	-0.12617	-0.24631	0.607657	0.0793532	-0.494525	-0.494525
		76	-0.234501	-0.658507	0.296686	-0.0716691	-0.495675	-0.290152	-0.452983	-0.332844	-0.658507	-0.658507	-0.149117	-0.332844	-0.149117	-0.615815	0.536063	-0.234501	-0.452983	-0.658507	-0.495675	-0.234501	-0.332844	0.133854	-0.12732	0.198343	-0.234501	-0.191809	0.0266737	-0.495675	-0.290152	-0.0289773	-0.495675	-0.452983	-0.0846284	0.0266737	-0.495675	-0.234501	0.515168	0.0355113	0.0266737	-0.234501	-0.495675	0.493371	-0.149117	0.0266737	-0.0846284	-0.397332	0.386191
		77	0.599442	0.109442	-0.273169	-0.315861	-0.577035	-0.534343	-0.534343	-0.577035	-0.577035	-0.577035	-0.230477	-0.119384	-0.00165144	-0.534343	0.291872	-0.315861	-0.534343	-0.577035	-0.577035	-0.315861	-0.577035	-0.0443432	-0.534343	-0.534343	0.828267	-0.0443432	0.174139	-0.348209	-0.534343	-0.0443432	-0.348209	-0.534343	-0.262826	0.63179	-0.348209	-0.315861	-0.0546862	-0.534343	0.860616	-0.087035	-0.577035	0.24918	-0.230477	-0.0546862	-0.491651	-0.315861	0.467663
		78	0.766785	0.115801	-0.309501	-0.0948562	-0.141386	0.0195975	-0.892642	-0.677998	-0.999964	-0.78532	-0.041195	-0.327669	-0.134336	-0.517014	-0.0554578	-0.685129	-0.624336	-0.731659	-0.624336	-0.685129	-0.78532	-0.134336	-0.463353	-0.517014	0.834627	0.241292	1.30738	-0.288189	-0.517014	0.026647	-0.180866	-0.570675	-0.663817	0.691811	-0.34185	-0.631468	0.0589959	-0.677998	0.759653	0.026647	-0.356031	0.105526	-0.416823	-0.423955	-0.463353	0.549078	0.3667
		79	1.3246	1.20474	-0.291577	-0.0769325	0.40766	0.0287483	-0.883491	-0.668847	-0.720866	-0.776169	0.246676	-0.0485706	-0.116413	0.0320314	-0.82983	-0.667205	0.194656	-0.722508	-0.345238	-0.12731	-0.506222	-0.116413	0.625587	-0.237916	0.852551	0.79911	1.33408	-0.00909039	-0.237916	0.0445708	-0.171715	-0.561524	-0.654666	0.448561	-0.0627515	-0.0736493	-0.184255	-0.128952	0.78635	0.0445708	-0.34688	-0.668847	-0.398899	-0.937153	-0.184255	0.567001	-0.668847
		80	0.45352	0.513869	-0.0042838	0.064516	0.500493	0.0729669	-0.839273	-0.576013	-0.530803	-0.73195	0.24228	-0.316158	-0.20379	0.27071	-0.834227	-0.622987	0.238875	-0.678289	-0.252405	-0.0830919	-0.462003	-0.30102	0.718421	-0.193697	-0.247358	0.614503	1.19809	-0.145082	-0.145082	-0.188651	-0.161863	-0.517306	-0.742043	-0.242312	-0.247358	0.0677992	-0.140036	-0.133348	-0.133348	-0.188651	-0.205431	-0.527398	-0.354681	-0.892934	-0.0914212	0.61122	-0.673243
		81	0.183496	0.680367	-0.113324	0.0163696	-0.0378363	-0.626346	-0.0752692	-0.302193	0.0649846	-0.626346	-0.135066	-0.210554	-0.259169	0.659085	-0.674961	-0.0808602	0.183496	-0.350808	-0.0322453	0.459034	-0.356399	-0.356399	0.502058	-0.356399	-0.356399	0.183496	-0.0378363	-0.307784	-0.307784	-0.129475	-0.431886	-0.626346	-0.529116	-0.405014	-0.356399	0.280726	-0.0808602	0.416011	-0.135066	-0.405014	-0.529116	-0.529116	-0.356399	-0.626346	-0.307784	-0.356399	-0.399423
		82	-0.422595	-0.310112	-0.293961	0.0646143	-0.488421	-0.193713	0.128482	-0.212882	-0.00121163	-0.537036	-0.47121	-0.27675	-0.439806	0.208501	-0.47121	-0.261497	-0.537036	-0.261497	-0.0984415	-0.147056	-0.422595	-0.537036	-0.37398	-0.537036	-0.537036	-0.422595	-0.488421	-0.37398	-0.488421	-0.310112	-0.228135	-0.537036	-0.325365	-0.585651	-0.537036	-0.325365	-0.147056	-0.0345739	-0.47121	-0.585651	-0.439806	-0.325365	-0.537036	-0.537036	-0.145098	-0.537036	-0.310112
		83	-0.203303	-0.0422055	-0.488345	-0.154527	-0.147142	-0.315624	0.347774	-0.0422055	-0.268968	-0.317744	-0.0327014	-0.203303	-0.658947	0.0627313	-0.544506	-0.212807	0.0234593	-0.0422055	-0.0983662	-0.0983662	-0.373905	-0.658947	-0.203303	-0.488345	-0.488345	-0.203303	-0.147142	-0.544506	-0.317744	-0.383409	-0.544506	-0.658947	-0.0327014	-0.317744	-0.147142	-0.373905	-0.268968	0.403934	-0.544506	-0.488345	-0.658947	-0.373905	-0.317744	-0.658947	0.0255789	-0.488345	-0.0422055
		84	-0.157504	-0.241764	-0.412365	-0.172998	0.0495627	-0.118919	-0.00659798	-0.211583	-0.31762	-0.181401	0.194185	-0.187685	-0.552786	-0.382184	-0.408164	-0.382184	0.0692582	-0.121039	-0.237562	-0.1772	-0.237562	-0.462242	-0.127323	-0.321822	-0.382184	-0.0367792	0.200469	-0.257257	-0.121039	-0.492423	-0.468526	-0.462242	0.133822	-0.211583	-0.131525	-0.328106	-0.498707	-0.0711622	-0.528888	-0.442547	-0.40188	-0.267743	-0.271945	-0.582967	0.192103	-0.472728	-0.332307
		85	-0.112384	-0.375356	-0.155087	-0.340037	0.111406	-0.693552	-0.254631	-0.247457	-0.370218	-0.0218406	0.239305	-0.338001	-0.393225	-0.613494	-0.363044	0.168248	0.0333834	-0.352349	-0.485595	-0.034362	-0.485595	-0.693552	-0.473074	-0.357696	-0.222623	-0.577966	0.457747	-0.407573	0.13624	-0.528298	-0.130253	-0.302681	-0.211929	-0.0520218	0.321189	0.107885	-0.649023	0.87014	-0.581486	-0.576139	-0.437754	-0.711212	-0.0146665	-0.911995	-0.284813	-0.313167	-0.075029
		86	-0.37447	-0.410722	-0.0198515	-0.0341997	-0.321282	-0.614435	-0.516717	-0.509543	-0.291101	-0.283926	-0.193383	-0.600087	-0.314108	-0.704979	-0.283926	0.0767633	-0.569906	-0.387715	-0.35036	-0.125846	-0.35036	-0.614435	-0.73516	-0.449181	-0.314108	-0.840052	0.0250598	-0.328456	-0.125846	-0.222461	-0.0511357	0.00315564	-0.644616	-0.314108	-0.111498	0.24312	-0.569906	0.437453	-0.502369	-0.667623	-0.358637	-0.802696	-0.276752	-0.832878	-0.546898	-0.404651	-0.337115
		87	-0.261668	-0.361319	0.224988	-0.0681655	-0.408245	-0.847975	-0.701398	-0.554822	-0.408245	-0.261668	-0.261668	-0.554822	-0.261668	-0.847975	-0.261668	0.324638	-0.554822	-0.507895	-0.361319	-0.115092	-0.361319	-0.847975	-0.847975	-0.554822	-0.261668	-1.14113	-0.115092	-0.554822	-0.115092	-0.214742	0.178061	0.0784112	-0.847975	-0.261668	0.178061	0.664718	-0.554822	0.910945	-0.408245	-0.701398	-0.554822	-0.994551	-0.115092	-0.994551	-0.701398	-0.261668	-0.115092
[truncated: 263 more columns]

## Sheet: Figure 5–figure supplement 3B_2
Figure 5–figure supplement 3B (prop.)	Data	Changes in event-related firing activity of HR type neurons during the acquisition phase of auditory discrimination task
	Subjects
	Softwear
	Dependent variable	Proportion of neurons (%)
	Stats
	Proportion of neurons in the aDLS at the early stage							Proportion of neurons in the aDLS at the middle stage							Proportion of neurons in the aDLS at the late stage
			CO	CR	RS	FL				CO	CR	RS	FL				CO	CR	RS	FL
	LL type	INC	1.01695	13.5593	16.6102	10.1695		LL type	INC	2.47253	9.89011	17.033	9.89011		LL type	INC	3.33333	21.3889	16.3889	11.9444
		DEC	0.338983	16.9492	10.5085	29.8305			DEC	1.0989	24.4505	17.033	35.989			DEC	1.38889	32.7778	26.1111	48.6111
	Proportion of neurons in the pVLS at the early stage							Proportion of neurons in the pVLS at the middle stage							Proportion of neurons in the pVLS at the late stage
			CO	CR	RS	FL				CO	CR	RS	FL				CO	CR	RS	FL
	LL type	INC	0	9.1954	3.44828	18.3908		LL type	INC	9.09091	15.4545	4.54545	10		LL type	INC	8.42105	18.9474	7.89474	33.1579
		DEC	1.14943	16.092	13.7931	20.6897			DEC	0	12.7273	11.8182	29.0909			DEC	1.57895	17.3684	18.9474	26.8421
