# Supplementary material for: Acquisition of auditory discrimination mediated by different processes through two distinct circuits linked to the lateral striatum
Source: eLife. 2025 Jul 11;13:RP97326. doi: 10.7554/eLife.97326 (PMC12252547; doi:10.7554/eLife.97326)
Supplement: Figure 5—figure supplement 4—source data 1. [file elife-97326-fig5-figsupp4-data1.xlsx]

## Sheet: Figure 5–figure supplement 4A
Figure 5–figure supplement 4A	Data	Mean firing rate and auROC values of aDLS RS-LL neurons
	Softwear	matlab ver 2019
	Group	Number of RS-LL neurons in the aDLS; 49, 62, and 59 neurons for early, middle, and late stages, respectively.
	Stats
	Firing rate at early stage
				Time bin
				1	2	3	4	5	6	7	8	9	10	11	12	13	14	15	16	17	18	19	20	21	22	23	24	25	26	27	28	29	30	31	32	33	34	35	36	37	38	39	40	41	42	43	44	45	46
	Trial type	Mean	HR	2.87666	2.79652	2.66904	2.73812	2.85416	2.74058	2.43502	2.43784	2.55681	2.24096	2.84726	2.11827	2.25915	1.72681	1.73369	1.91436	1.86841	1.61014	1.65721	1.77079	1.51491	1.3788	1.44844	1.98428	2.32413	2.25622	2.00789	1.85329	1.90481	2.14281	2.66177	2.56444	2.63198	2.26027	2.58681	2.53003	2.34602	2.48275	2.44611	2.0098	2.3142	2.09766	1.75476	1.83561	1.87129	1.48678
			LR	2.12189	2.62246	2.12701	2.12099	2.16208	2.19234	2.30091	2.04018	2.15717	1.99021	2.12001	2.12512	2.22144	1.66698	1.76571	1.85511	1.95078	1.70341	1.66631	1.66823	1.47008	1.35388	1.43985	2.39875	2.84874	2.2277	1.74952	1.15303	1.51747	1.83035	1.90472	1.66098	1.81639	1.91961	1.6368	1.55868	1.46967	1.49745	1.77922	1.65392	1.79128	1.41922	2.07352	1.78318	1.47976	1.55475
			HL	2.46031	2.60062	2.44217	2.90358	2.90894	2.68665	2.792	2.76843	2.73327	3.15732	2.79189	2.89949	3.02314	3.19757	3.0613	3.29103	3.52355	3.37648	3.75928	4.13908	4.05735	4.20906	4.95996	6.58583	7.74181	7.34858	6.55738	5.49657	5.35832	4.77274	4.35853	4.86659	4.93894	4.50744	4.11019	3.98651	3.91173	3.89762	3.43574	3.52688	3.55317	3.52496	3.40217	3.14876	3.13598	3.002
			LL	3.46138	3.19907	3.1627	3.22294	3.20925	3.17732	3.5065	3.52435	3.47847	3.69121	3.77111	3.6131	3.87601	3.67075	3.92855	4.07782	4.25723	4.11755	4.60418	4.67257	4.63849	5.15998	5.57128	7.24457	8.55333	8.57328	7.08501	6.36925	5.68551	6.40375	7.22106	7.6457	7.99332	8.08553	7.98067	8.12181	8.14509	7.41632	7.779	7.69728	6.96819	6.26281	5.8718	5.50099	4.82304	4.3142
		s.e.m.	HR	0.439522	0.42559	0.385467	0.391612	0.427838	0.40109	0.379143	0.407244	0.358485	0.334845	0.440902	0.290925	0.339708	0.26244	0.279586	0.318904	0.315145	0.292583	0.366777	0.319898	0.251509	0.260772	0.280629	0.578736	0.875656	0.667588	0.441706	0.431148	0.520195	0.673219	0.721616	0.775429	0.716174	0.601231	0.558858	0.549841	0.503458	0.626091	0.663935	0.567999	0.675155	0.493612	0.537774	0.462527	0.447735	0.25743
			LR	0.382148	0.36987	0.358322	0.311977	0.306291	0.336452	0.375201	0.315567	0.324857	0.298228	0.339909	0.360713	0.394227	0.317496	0.36896	0.378305	0.379339	0.334566	0.288313	0.268227	0.25291	0.210999	0.249154	0.808369	0.873986	0.815984	0.423555	0.294183	0.298994	0.428728	0.475708	0.400167	0.41454	0.493871	0.334185	0.358088	0.332981	0.320857	0.385594	0.354935	0.387128	0.276029	0.337139	0.342892	0.245666	0.270313
			HL	0.409389	0.443552	0.366051	0.572676	0.520399	0.440914	0.506738	0.508181	0.511926	0.564948	0.516911	0.515024	0.561907	0.640394	0.611194	0.674458	0.756721	0.781176	0.893526	0.98766	0.97434	1.12396	1.35437	1.9788	2.09044	1.90153	1.69548	1.44178	1.34404	1.18059	1.05173	1.03133	1.0089	0.934417	0.643273	0.608288	0.587043	0.676003	0.633875	0.547037	0.627936	0.548413	0.459741	0.429489	0.525095	0.401636
			LL	0.565443	0.537591	0.498235	0.528847	0.542872	0.504773	0.57353	0.724877	0.725206	0.671389	0.739911	0.76299	0.772828	0.853402	0.924298	0.97723	1.13104	1.03235	1.16282	1.25276	1.30916	1.45723	1.74186	2.19065	2.34869	2.2172	1.6651	1.45061	1.19371	1.14589	1.24192	1.1195	1.055	1.06785	1.11969	1.3069	1.276	1.25963	1.42529	1.44601	1.39975	1.39362	1.31153	1.1408	1.03863	0.883969
		p value (vs. HR)	LL vs. HR	0.586716	0.660544	0.528181	0.644408	0.824136	0.735012	0.194864	0.700507	0.702171	0.150096	0.932534	0.220689	0.719	0.370313	0.118406	0.133286	0.211771	0.0664475	0.0113247	0.196334	0.0351273	0.00218959	0.00404329	0.000705884	4.45565e-05	9.08694e-05	0.00181057	0.00019105	6.29505e-05	1.13439e-05	2.4181e-05	5.87072e-06	1.75688e-06	1.31287e-07	1.13439e-05	6.71198e-06	3.47714e-06	2.38203e-05	5.53507e-05	7.95503e-06	8.63672e-05	9.84983e-05	0.000110613	4.96601e-05	0.00126395	0.00180218
			LL vs. HR	0.016393	0.52202	0.145037	0.128876	0.32888	0.206982	0.212297	0.123447	0.135891	0.0293664	0.0770527	0.255182	0.413151	0.0318051	0.0878685	0.0417001	0.202168	0.0430772	0.0421385	0.0271468	0.00991535	0.00386857	0.0045131	0.000383357	0.000155303	6.13642e-05	0.000374802	1.33079e-05	1.21056e-05	3.50832e-05	2.83206e-06	2.931e-07	2.22375e-07	1.31287e-07	6.77733e-08	2.22375e-07	3.63344e-08	4.47102e-07	1.63718e-06	8.94825e-06	0.000163686	9.31522e-05	0.00547579	0.000127744	0.000526866	0.000393544
			LL vs. LR	0.00315249	0.0640472	0.00815563	0.28995	0.600904	0.0666159	0.0771872	0.112432	0.0472539	0.118547	0.0288473	0.315537	0.0726959	0.491277	0.142846	0.166746	0.41428	0.135703	0.0469927	0.339108	0.586555	0.0397326	0.349578	0.231579	0.0340504	0.0262591	0.154222	0.00910225	0.108278	0.00032425	7.23003e-06	6.36545e-05	3.81834e-05	2.86592e-06	1.30639e-05	4.61751e-05	4.63233e-05	0.000547329	7.90795e-05	0.00556231	0.00868081	0.0489236	0.114855	0.0656325	0.361624	0.373238
			LR vs. HR	0.240147	0.852252	0.531014	0.67208	0.940951	0.406095	0.742873	0.734889	0.417784	0.170333	0.220436	0.272638	0.917335	0.184741	0.264582	0.214964	0.16161	0.0811076	0.0507367	0.106676	0.0565429	0.00539618	0.00138582	0.00569047	0.00085212	0.00237912	0.0093705	0.000937545	0.00032026	0.000913565	0.0109074	0.00162383	0.00365418	0.00539579	0.0155218	0.00243962	0.00168346	0.00117734	0.00188172	0.000501868	0.000338597	0.00195233	7.2509e-05	0.000212344	0.00399739	0.000780547
			LR vs. LR	0.340897	0.664384	0.441155	0.448114	0.397143	0.679811	0.829464	0.328876	0.639464	0.0656244	0.570359	0.378616	0.366501	0.0224036	0.181962	0.0612595	0.147332	0.0636047	0.0933227	0.00650406	0.0174135	0.0133199	0.0019586	0.00282278	0.00251605	0.000566563	0.0020368	3.08711e-05	0.000215959	0.000598509	0.000880914	0.000181666	0.000203674	0.00033856	1.47778e-05	1.65952e-05	2.06976e-06	2.9417e-05	0.00162739	0.000652266	0.000297179	0.000346154	0.00432527	0.000451737	0.00186344	0.000443812
	Firing rate at middle stage
				Time bin
				1	2	3	4	5	6	7	8	9	10	11	12	13	14	15	16	17	18	19	20	21	22	23	24	25	26	27	28	29	30	31	32	33	34	35	36	37	38	39	40	41	42	43	44	45	46
	Trial type	Mean	HR	2.99793	2.75672	3.01734	2.85312	2.60069	2.94145	3.18191	2.97793	3.12453	3.11903	3.09136	3.18183	3.23326	3.19055	3.04467	2.58758	2.69054	2.48105	2.40352	2.37084	2.04007	2.13338	2.15468	1.82297	1.89452	2.15042	2.5354	2.91864	3.32337	3.5433	3.46745	3.43588	3.41264	3.27083	3.25725	3.10331	2.5599	2.52571	2.4926	2.11902	2.32232	1.99041	2.28379	1.86828	1.92837	1.59603
			LR	2.81612	2.85182	2.95204	2.87041	2.51881	2.55545	2.64315	2.60593	3.08117	3.11716	3.16101	2.94222	2.73055	3.00505	2.43475	2.45153	2.39703	2.17261	2.30178	2.11391	2.05947	1.91976	1.67019	1.72009	1.66024	1.69168	1.60819	1.78679	1.7996	1.85846	1.95067	2.22464	2.17522	2.41851	2.54291	2.31217	2.16775	2.25122	2.32503	2.58378	2.00922	2.08129	2.23701	2.02656	1.89934	1.65533
			HL	2.27998	1.82626	2.22075	2.32291	2.4117	2.29196	1.95161	2.55573	2.5191	2.30241	2.4776	2.47777	2.17816	1.98608	1.89239	1.99352	1.88773	2.00625	1.78452	1.55449	1.4615	1.55795	1.61866	2.00954	2.4163	2.47063	2.61487	2.82562	3.26384	3.32493	3.96412	4.49897	4.99447	5.10594	5.08765	4.935	5.00781	5.22391	5.14592	5.09493	5.02424	4.88792	4.55332	4.04866	4.3202	4.02469
			LL	2.49071	2.61143	2.20847	2.45925	2.38109	2.43796	2.42843	2.25854	2.43247	2.22193	2.526	2.25268	2.29972	2.31956	2.31801	2.18138	2.15485	2.0976	2.01796	1.88565	1.97258	2.02595	2.19862	2.56971	3.04433	2.99545	3.38269	4.12542	5.22357	6.01412	7.5061	8.63177	10.3515	10.4167	9.82135	9.62647	8.55859	7.81816	7.23492	6.46852	6.00625	5.40705	4.58335	4.09877	3.52696	3.09692
		s.e.m.	HR	0.346103	0.330675	0.407407	0.367318	0.329157	0.421141	0.476445	0.428045	0.4683	0.501875	0.471085	0.576019	0.553938	0.545126	0.576186	0.493184	0.51808	0.539487	0.513064	0.517001	0.462658	0.556715	0.576993	0.453109	0.459244	0.532526	0.698829	0.947622	1.12423	1.22242	1.16399	1.11372	1.11356	1.0141	0.91199	0.801046	0.686227	0.669301	0.629482	0.582073	0.612466	0.610811	0.655366	0.625039	0.630668	0.456057
			LR	0.369889	0.393679	0.36082	0.367638	0.388707	0.372852	0.411915	0.409352	0.482183	0.540658	0.500805	0.535407	0.455739	0.503471	0.407523	0.467477	0.44411	0.428984	0.412907	0.477692	0.445592	0.453161	0.38063	0.378326	0.387488	0.391837	0.344338	0.405572	0.543676	0.523051	0.592234	0.661085	0.576175	0.58299	0.638363	0.619763	0.512662	0.540227	0.545846	0.500848	0.416299	0.435594	0.373632	0.324002	0.299695	0.255988
			HL	0.368121	0.307115	0.320034	0.365294	0.351357	0.358747	0.383698	0.467789	0.49677	0.444957	0.570042	0.631539	0.632854	0.639585	0.576706	0.625404	0.60611	0.680778	0.585304	0.520221	0.474802	0.595067	0.605501	0.834362	0.91396	0.959195	0.969909	0.938506	0.861044	0.933935	0.977351	0.976653	1.03677	0.946912	0.833713	0.809067	0.760773	0.729107	0.705006	0.710417	0.663448	0.624117	0.540387	0.569634	0.620951	0.479731
			LL	0.416983	0.428706	0.385157	0.414266	0.442656	0.4351	0.447431	0.409379	0.491784	0.491219	0.528285	0.575818	0.614753	0.629175	0.687957	0.657993	0.649218	0.623817	0.646724	0.615449	0.689018	0.705417	0.796471	1.06101	1.20252	0.964551	0.911978	0.920401	1.07801	1.02721	1.04285	1.09937	1.19578	1.09305	0.98532	1.0142	0.956636	1.01423	1.01957	1.08159	1.19776	1.16389	1.02577	1.07191	0.948011	0.841587
		p value	HR vs. LR	0.102242	0.287067	0.131711	0.130179	0.207485	0.244579	0.0714058	0.0633428	0.0338865	0.0511062	0.0497049	0.0182861	0.00529036	0.0109761	0.0103519	0.0396909	0.0772436	0.0753995	0.0974181	0.0111258	0.215977	0.506169	0.486229	0.842736	0.51046	0.155502	0.0651968	0.00323525	0.00116304	0.00016857	6.9608e-06	8.76039e-07	2.36519e-07	2.27639e-07	4.60489e-07	4.76968e-07	8.2332e-08	2.36603e-07	4.51353e-07	2.41019e-06	0.000125872	6.40261e-05	0.00222633	0.00169196	0.196178	0.0867014
			HR vs. HL	0.601247	0.488345	0.0596954	0.110727	0.981469	0.352353	0.394397	0.481962	0.206936	0.0784251	0.163427	0.0906635	0.04746	0.042179	0.076819	0.154335	0.109981	0.223078	0.0278063	0.487075	0.325328	0.484313	0.347196	0.458825	0.463123	0.124743	0.0541546	0.00435331	0.000112201	1.15154e-05	4.93738e-07	1.20295e-07	2.54254e-08	3.57334e-08	1.34739e-07	7.39293e-08	5.52081e-08	1.53923e-07	1.42198e-06	0.0011102	0.000531177	0.00306141	0.158097	0.452981	0.50198	0.494586
			HR vs. LL	0.701536	0.00412287	0.391593	0.626992	0.384293	0.823442	0.0917041	0.277959	0.41583	0.51985	0.448288	0.55693	0.494591	0.0695375	0.0409244	0.902041	0.257492	0.544747	0.597343	0.0619207	0.0897463	0.00373188	0.0236162	0.0958955	0.164868	0.0481894	0.00839572	0.000391837	2.8578e-05	2.46082e-05	3.17313e-07	1.3703e-06	8.36781e-06	1.38509e-06	9.97573e-05	2.32439e-05	0.000486534	0.0181404	0.0593652	0.210062	0.826592	0.334001	0.160797	0.0356431	0.00280751	0.000455559
			LR vs. HR	0.0154918	0.00806357	0.175439	0.156439	0.650585	0.190063	0.00448623	0.0937994	0.196348	0.161739	0.0930612	0.231613	0.0152817	0.000603664	0.00124206	0.0178913	0.0128731	0.0518058	0.0817205	0.00479248	0.0356384	0.0288702	0.134313	0.1751	0.659366	0.99483	0.807351	0.279215	0.061723	0.0477509	0.0525467	0.00677274	0.000445652	0.00101254	0.000824098	0.000669412	9.28155e-05	0.000196197	5.92081e-05	9.79589e-06	1.57793e-05	1.28372e-05	5.86738e-06	4.32397e-06	8.31152e-06	7.07659e-07
			LR vs. LR	0.333972	0.0164748	0.0818553	0.186808	0.899385	0.512859	0.0946146	0.616684	0.241777	0.120578	0.204296	0.405388	0.0475283	0.00349881	0.00666845	0.0513215	0.0463346	0.125171	0.0246856	0.0416932	0.0741417	0.0253373	0.0717579	0.0799164	0.799807	0.78053	0.871309	0.251428	0.00623469	0.0112731	0.00527701	0.00111623	0.00043373	0.00586142	0.000733879	0.000405165	2.09878e-05	3.92794e-05	3.30403e-05	0.000586211	6.60021e-06	4.6583e-06	7.79587e-05	0.000125858	8.03754e-06	4.69602e-06
	Firing rate at late stage
				Time bin
				1	2	3	4	5	6	7	8	9	10	11	12	13	14	15	16	17	18	19	20	21	22	23	24	25	26	27	28	29	30	31	32	33	34	35	36	37	38	39	40	41	42	43	44	45	46
	Trial type	Mean	HR	2.64602	2.66313	2.28638	2.43763	2.3232	2.33632	2.50417	2.48598	2.84853	2.61584	2.78175	2.67063	2.62952	2.67559	2.85244	3.03548	3.32282	3.19948	3.04454	2.75755	2.62628	2.42625	2.44184	2.89256	3.49116	3.81573	3.74317	3.37371	2.7206	2.47612	2.17519	2.4743	2.83422	3.29362	3.17855	3.21797	2.92517	2.92381	2.78358	2.78192	2.46651	2.47551	2.39704	2.59843	2.48979	2.34585
			LR	1.976	2.26029	2.2885	2.37766	1.65222	2.26467	2.72914	2.05738	1.35955	1.60884	1.99722	1.62041	2.30787	2.32473	2.47149	2.3054	3.14254	2.65463	2.10443	2.07042	2.48163	2.10913	2.31343	2.6475	2.80347	2.49076	2.5954	2.57029	2.04442	1.30928	1.3724	1.19361	1.63007	2.03554	2.04057	2.25008	1.88099	1.99194	2.40607	2.43144	2.27764	2.35474	2.16447	1.99553	2.21995	2.11773
			HL	1.74115	1.83721	2.11862	1.95359	2.01944	1.80168	2.07089	2.35587	2.05567	1.96487	1.9857	2.2637	2.15788	2.16918	2.24422	2.52184	1.92418	1.8758	2.12185	2.3423	2.85259	2.50857	2.59578	3.02847	3.05863	3.12192	3.63104	3.23913	3.44808	3.16227	2.64306	2.57414	3.3979	2.72359	3.50451	4.07562	4.09824	4.50469	3.92245	4.03152	3.53105	3.52403	3.08114	3.62528	3.57979	3.16992
			LL	1.79719	1.65595	1.52411	1.62527	1.66621	1.67551	1.98313	1.83911	1.92067	2.47671	2.42231	2.5189	2.59161	2.8223	2.49597	2.36664	2.24322	1.9546	2.00011	1.9938	2.22723	2.41494	2.57094	3.13592	3.92554	4.57356	5.39399	5.94183	6.8876	7.74834	8.19043	8.50572	8.74663	8.80192	8.36553	8.18579	7.65839	7.02022	6.5435	5.79975	5.31534	4.61964	4.40189	3.90183	3.63548	3.26841
		s.e.m.	HR	0.503292	0.58348	0.437998	0.480618	0.452096	0.493157	0.46783	0.516517	0.564476	0.541612	0.619843	0.62022	0.617822	0.637382	0.726486	0.817594	0.904974	0.918115	0.829506	0.748395	0.764648	0.766444	0.858363	1.0758	1.42883	1.65686	1.5431	1.29073	0.916413	0.698762	0.55669	0.690245	0.963273	1.31749	1.41897	1.45989	1.40589	1.39907	1.26825	1.14508	0.955574	0.821364	0.648653	0.703063	0.650088	0.643045
			LR	0.553813	0.78285	0.693701	0.606241	0.536661	0.799391	0.729732	0.600136	0.293611	0.382899	0.424846	0.330057	0.643046	0.603873	0.62915	0.889861	0.920115	0.978606	0.600526	0.700083	0.738056	0.651455	0.830411	0.903907	1.26844	1.09256	1.10785	0.901056	0.789951	0.445346	0.400525	0.353866	0.369723	0.525785	0.559285	0.612876	0.487556	0.606764	0.689489	0.744578	0.732398	0.785741	0.745794	0.777206	0.621322	0.663381
			HL	0.385666	0.439393	0.450114	0.351599	0.340254	0.364336	0.44758	0.461751	0.507884	0.443471	0.695013	0.628327	0.517089	0.541589	0.497085	0.604949	0.471543	0.442728	0.535402	0.655801	0.890064	0.700371	0.963411	1.04047	1.03285	1.16139	0.993089	0.7571	0.816768	0.663415	0.634486	0.573023	0.765302	0.516277	0.606639	0.746276	0.694	0.786516	0.620697	0.636886	0.447152	0.622394	0.589089	0.660616	0.651558	0.680838
			LL	0.273406	0.271359	0.248498	0.303622	0.328079	0.360995	0.484696	0.501351	0.49369	0.659292	0.712711	0.738143	0.802284	0.868136	0.726782	0.607534	0.539382	0.4934	0.499892	0.606558	0.650977	0.755302	0.889429	1.13757	1.28162	1.31579	1.22629	1.24322	1.52748	1.75084	1.836	1.75666	1.65491	1.52733	1.38499	1.17508	1.06725	1.08584	1.14155	1.18615	1.22256	1.36144	1.41979	1.32251	1.29197	1.14167
		p value	HR vs. LR	0.0492335	0.0056197	0.03982	0.0147276	0.081378	0.0979711	0.0194374	0.121572	0.0662175	0.50458	0.461611	0.951939	0.903302	0.858262	0.438879	0.869702	0.724578	0.972227	0.392925	0.389537	0.953587	0.490055	0.327175	0.0541069	0.0121626	0.00510939	0.00568942	0.00188463	0.00108415	0.000366284	8.43307e-05	3.7952e-05	2.57114e-06	1.16794e-06	1.2155e-07	3.9083e-08	2.43364e-08	2.56939e-07	1.31939e-05	0.00100427	0.000828657	0.0405467	0.215506	0.385909	0.749921	0.689149
			HR vs. HL	0.317888	0.551879	0.96535	0.705424	0.259205	0.205002	0.232833	0.738939	0.265767	0.25668	0.30469	0.197674	0.554806	0.288423	0.491252	0.257495	0.968486	0.842301	0.717161	0.22067	0.299058	0.16404	0.0823543	0.0594525	0.00201152	0.000413579	0.000322982	0.000297113	0.000133293	4.56818e-06	1.76361e-06	8.73695e-07	2.76797e-06	2.13547e-06	4.12266e-08	4.60403e-07	7.24996e-08	2.41178e-07	2.27049e-05	0.000357946	0.000168504	0.0178745	0.0617637	0.017449	0.69939	0.308447
			HR vs. LL	0.482832	0.828049	0.247966	0.264859	0.243717	0.650825	0.876958	0.198386	0.975453	0.518166	0.0530064	0.458638	0.650825	0.551921	0.915723	0.983634	0.347181	0.991816	0.795428	0.385515	0.314819	0.650825	0.615259	0.675303	0.0975697	0.021438	0.0231995	0.00096123	0.00299375	0.000152525	2.00409e-07	8.35686e-08	2.97389e-07	5.26531e-08	1.7189e-05	0.000160658	0.00021687	0.150944	0.292458	0.426052	0.527615	0.0977417	0.0850544	0.0375809	0.00750676	0.0400908
			LR vs. HR	0.0439195	0.0278103	0.934676	0.496933	0.378984	0.403601	0.209041	0.629283	0.0501039	0.106168	0.0187447	0.466261	0.505716	0.84065	0.895593	0.491958	0.335526	0.674023	0.586709	0.946003	0.64241	0.925616	0.437901	0.0811136	0.507514	0.0863992	0.0204246	0.229282	0.0735978	0.205016	0.501625	0.272201	0.159922	0.093963	0.00292059	0.00224837	0.00188502	0.000558374	0.0151071	0.00540974	0.00118451	0.00240376	0.0765055	0.0564983	0.0605428	0.112039
			LR vs. LR	0.740993	0.727768	0.582693	0.943177	0.0542871	0.889009	0.279779	0.166928	0.402401	0.609412	0.255964	0.252397	0.909027	0.97686	0.769472	0.228643	0.264643	0.968987	0.418268	0.0727246	0.299732	0.393945	0.148995	0.0373212	0.0523613	0.0108444	0.00302856	0.0854617	0.0133875	0.00225016	0.0969883	0.0274789	0.118037	0.161374	0.027749	0.00896569	0.00265782	0.00177702	0.00969774	0.0098918	0.00355741	0.00907364	0.0163809	0.00112703	0.0406866	0.0363919
	ROC value at early stage
				Time bin
				1	2	3	4	5	6	7	8	9	10	11	12	13	14	15	16	17	18	19	20	21	22	23	24	25
	Trial types compared Trials compared Trials compired	Mean	HL vs. LL	0.483603	0.489698	0.496098	0.486658	0.486634	0.485972	0.491592	0.483404	0.486647	0.487904	0.490873	0.490725	0.480249	0.481841	0.464414	0.426808	0.41709	0.41788	0.417439	0.418295	0.454987	0.464708	0.474689	0.480904	0.500772
			HL vs. LR	0.500799	0.509754	0.510133	0.510065	0.511763	0.515992	0.522682	0.526288	0.532469	0.543343	0.550294	0.561866	0.579403	0.58562	0.570365	0.570061	0.568296	0.565649	0.557347	0.541662	0.551775	0.535232	0.536466	0.528116	0.53122
			HL vs. HR	0.492647	0.49861	0.496107	0.502481	0.506667	0.504971	0.519482	0.519338	0.531832	0.54227	0.549387	0.559813	0.578507	0.572244	0.567334	0.555699	0.553747	0.54023	0.536397	0.535168	0.5379	0.54083	0.532911	0.54334	0.542948
		s.e.m.	HL vs. LL	0.00666118	0.00516364	0.00663401	0.00561464	0.00512405	0.00737898	0.00627901	0.00697274	0.00643382	0.00639537	0.00666465	0.00703138	0.00768519	0.00762411	0.00826587	0.0127558	0.015131	0.0158999	0.016383	0.0176572	0.0177353	0.0164433	0.0143113	0.0120431	0.0106482
			HL vs. LR	0.0102396	0.0106302	0.00953477	0.0109319	0.0101406	0.0111407	0.0124118	0.0129547	0.0155956	0.0160749	0.0161806	0.0174406	0.021108	0.0216611	0.0208581	0.0199437	0.0188374	0.0126719	0.0112184	0.0131036	0.0132503	0.0103225	0.00965923	0.00897813	0.0081036
			HL vs. HR	0.0108024	0.0111194	0.0117616	0.0122731	0.0108677	0.011587	0.0120963	0.0124477	0.0149242	0.0168274	0.0161495	0.017878	0.0212474	0.0229293	0.0227246	0.0217598	0.0201444	0.0157035	0.0148258	0.016424	0.0177046	0.0153007	0.00992733	0.00953914	0.00950471
		p value	HL vs. LL	0.0251344	0.0947145	0.193995	0.00896969	0.00281678	0.0917048	0.185437	0.132043	0.180549	0.022299	0.123528	0.0540857	0.0040542	0.00765869	1.28534e-07	6.93333e-08	8.39564e-10	2.09403e-08	6.93333e-08	1.1958e-06	0.0621152	0.18991	0.711351	0.855351	0.135799
			HL vs. LR	0.349674	0.259065	0.26367	0.0621142	0.18991	0.259065	0.132044	0.0237545	0.022299	0.084928	0.0569474	0.0207684	0.000520004	2.26479e-07	9.4274e-08	4.77666e-06	5.24827e-08	1.42332e-10	5.86817e-10	3.07675e-07	9.41726e-07	1.69318e-07	3.34299e-06	9.45576e-05	5.14822e-07
			HL vs. HR	0.1358	0.189909	0.26367	0.855351	0.711351	0.852561	0.854031	0.85403	0.259067	0.0569474	0.0596225	0.00153004	0.00112349	0.00256097	3.34702e-05	3.34702e-05	0.000364425	1.59011e-05	3.34679e-05	9.41726e-07	1.28534e-07	1.19569e-06	3.98034e-05	6.93257e-08	4.03956e-07
	ROC value at middle stage
				Time bin
				1	2	3	4	5	6	7	8	9	10	11	12	13	14	15	16	17	18	19	20	21	22	23	24	25
	Trial types compared Trials compared Trials compired	Mean	HL vs. LL	0.493397	0.500812	0.500156	0.500632	0.502684	0.498135	0.49275	0.492903	0.496505	0.492932	0.486712	0.486242	0.487232	0.46762	0.445175	0.41262	0.38932	0.404567	0.432093	0.470872	0.502899	0.514341	0.53337	0.531659	0.522894
			HL vs. LR	0.480469	0.486694	0.496376	0.491732	0.484497	0.484119	0.474778	0.483112	0.489816	0.484074	0.481728	0.490333	0.505048	0.51182	0.530473	0.547132	0.562841	0.565744	0.56935	0.564406	0.569884	0.554139	0.557616	0.549528	0.544159
			HL vs. HR	0.480141	0.487622	0.491094	0.482867	0.480576	0.481189	0.471382	0.475177	0.479516	0.479466	0.48141	0.486205	0.498639	0.500978	0.516894	0.531802	0.548942	0.549731	0.562045	0.565416	0.568443	0.562999	0.562049	0.558534	0.544458
		s.e.m.	HL vs. LL	0.00498931	0.00544491	0.00438045	0.00573487	0.00539584	0.00591089	0.00543485	0.00425884	0.00507506	0.003742	0.00370326	0.00497599	0.00571001	0.00812027	0.0112802	0.0149813	0.0195525	0.0199886	0.0195012	0.0184344	0.0166879	0.0148638	0.0144993	0.0134462	0.0113024
			HL vs. LR	0.00830229	0.00893136	0.0094534	0.0113114	0.0112919	0.0122364	0.0126418	0.0121371	0.0132523	0.0119117	0.0131829	0.0137861	0.0161925	0.0167319	0.0168983	0.0180237	0.0186003	0.0175106	0.0146867	0.0144746	0.0130245	0.0118899	0.0109761	0.00996652	0.00884372
			HL vs. HR	0.00755689	0.00845652	0.00981971	0.0110836	0.011059	0.012872	0.0125896	0.0125413	0.0144466	0.0130588	0.0138524	0.0163316	0.0175827	0.0198157	0.020463	0.0215788	0.0218414	0.0203092	0.0168905	0.0159347	0.0141971	0.0121674	0.0121602	0.011037	0.0108742
		p value	HL vs. LL	0.869145	0.242235	0.738752	0.869145	0.400187	0.503033	0.00382759	0.122534	0.0876529	0.310381	0.00016937	0.000309877	0.0241615	2.79252e-06	6.11733e-09	2.50055e-12	2.5313e-09	1.6829e-05	0.000934283	0.321681	0.047179	0.0205626	1.82105e-08	4.20857e-08	0.00476221
			HL vs. LR	0.002701	0.0296977	0.318199	0.740699	0.182932	0.318201	0.00229808	4.78478e-05	0.731818	0.0256293	0.000146076	0.114764	0.214752	0.153542	2.62397e-07	7.44379e-08	7.99923e-07	0.000104568	1.43791e-08	9.2289e-11	3.57332e-12	1.82115e-08	2.49986e-12	4.20857e-08	2.53097e-09
			HL vs. HR	0.000245312	0.0205626	0.742492	0.0205619	0.047179	0.00160445	3.29081e-05	9.08996e-05	0.0256291	0.015706	4.7851e-05	0.722874	0.37597	0.0779202	6.57931e-05	0.000629487	4.46507e-08	2.12439e-07	9.2289e-11	2.53064e-09	3.23235e-13	3.16116e-10	3.23235e-13	2.35698e-10	1.11003e-08
	ROC value at late stage
				Time bin
				1	2	3	4	5	6	7	8	9	10	11	12	13	14	15	16	17	18	19	20	21	22	23	24	25
	Trial types compared Trials compared Trials compired	Mean	HL vs. LL	0.494332	0.50161	0.512636	0.496703	0.481762	0.477209	0.484286	0.504207	0.492516	0.500932	0.511532	0.502837	0.4846	0.4564	0.42418	0.40339	0.409633	0.418206	0.438753	0.493316	0.497999	0.508109	0.514415	0.509405	0.542096
			HL vs. LR	0.49358	0.496624	0.506582	0.502193	0.503552	0.495232	0.49297	0.503121	0.488657	0.507582	0.514266	0.517551	0.538299	0.547507	0.554399	0.535758	0.536329	0.563182	0.558763	0.563181	0.548011	0.551712	0.533063	0.543292	0.541368
			HL vs. HR	0.479536	0.4896	0.493537	0.481039	0.466166	0.466666	0.48258	0.492568	0.473492	0.484252	0.50555	0.511048	0.525888	0.535001	0.523625	0.533023	0.551488	0.552211	0.553323	0.563263	0.539687	0.517847	0.516067	0.508288	0.545667
		s.e.m.	HL vs. LL	0.0111536	0.0086571	0.0114295	0.00816638	0.00655733	0.00674462	0.0111393	0.0130366	0.00992139	0.00978181	0.011163	0.0115697	0.0137651	0.0152491	0.0193207	0.0188644	0.0214591	0.0218657	0.0215331	0.0253731	0.0223919	0.0215189	0.0210697	0.0185715	0.0215126
			HL vs. LR	0.0119471	0.0111731	0.0124526	0.0151658	0.0113773	0.0104612	0.0134399	0.0140232	0.0171192	0.0133046	0.0142999	0.0136715	0.0166183	0.0178023	0.0187347	0.0162424	0.0201001	0.0184971	0.019066	0.0199302	0.0195452	0.0152211	0.0156709	0.0139423	0.0140175
			HL vs. HR	0.0125686	0.0117018	0.0130738	0.0120979	0.0116655	0.0116519	0.0153582	0.0183923	0.017865	0.0172208	0.0181774	0.0186211	0.0209924	0.0201828	0.019078	0.0225834	0.0226709	0.0213969	0.0198561	0.0218184	0.0185564	0.0191635	0.0187431	0.0158853	0.0203174
		p value	HL vs. LL	1.68978e-08	0.0379525	0.224389	0.00106234	2.67854e-07	1.28818e-08	9.21755e-06	0.00714779	0.000418138	0.003893	0.0125625	0.000195549	2.95426e-05	1.66983e-06	6.87495e-09	1.96341e-13	3.49158e-12	2.16256e-08	4.64929e-06	0.394082	1	1	0.731262	0.385965	0.0115545
			HL vs. LR	0.678202	0.54991	0.543425	0.846444	0.412947	0.683852	0.528105	0.291682	0.838894	1	0.394376	0.0572267	0.0098948	0.00118541	0.00869338	0.0943557	0.0400572	0.000174081	3.33641e-05	0.000487784	0.00105965	0.000106397	0.00105975	0.000784544	0.00305053
			HL vs. HR	8.12916e-06	0.00116778	0.00340578	0.0020151	3.03471e-08	2.6718e-06	0.000854097	0.00312963	0.00477143	0.00477039	0.0486368	0.285539	0.279867	0.720226	0.370999	0.859912	0.376407	0.00132783	0.114565	0.121377	0.390194	0.731261	0.865392	0.228536	0.490301
[truncated: 4 more columns]

## Sheet: Figure 5–figure supplement 4B
Figure 5–figure supplement 4B	Data	Averaged firing rate during the RS period in the LL and HL trial types at the early, middle, and late stages
	Softwear	matlab ver 2019
	Group	Number of RS-LL neurons in the aDLS; 49, 62, and 59 neurons for early, middle, and late stages, respectively.
	Dependent variable	Firing rate (Hz)
	Stats	Kruskalwallis test; LL trial type, χ2 = 2.466487812237715, p = 0.291345944224767 HL trial type, χ2 = 4.425666477789156, p = 0.109390280252710
			Firing rate on the LL trial					Firing rate on the HL trial
	Learning stage	early	21.5686			Learning stage	early	23.2432
		early	35.817				early	33.1532
		early	4.64052				early	4.14414
		early	12.6144				early	7.86787
		early	3.26797				early	3.12312
		early	4.90196				early	2.82282
		early	24.5				early	26.0819
		early	10.3889				early	10.4094
		early	5.27778				early	1.40351
		early	3.27778				early	3.33333
		early	2.55556				early	1.52047
		early	13.4444				early	2.04678
		early	0.555556				early	0.0584795
		early	6.55556				early	4.73684
		early	2.74854				early	0.13468
		early	14.269				early	10.1684
		early	5.20468				early	1.07744
		early	3.45029				early	2.55892
		early	14.6237				early	10.2058
		early	3.15412				early	1.893
		early	2.77778				early	3.73333
		early	3.30247				early	2.7896
		early	3.14815				early	0.472813
		early	1.60494				early	0.141844
		early	2.53086				early	1.04019
		early	2.99259				early	2.98246
		early	0.325926				early	0.0292398
		early	13.3037				early	9.91228
		early	7.60064				early	6.81481
		early	1.90016				early	0.148148
		early	9.91948				early	5.55556
		early	2.89855				early	1.44444
		early	4.34783				early	2.77778
		early	3.20151				early	4.19287
		early	11.4878				early	0.964361
		early	9.71751				early	0.67086
		early	5.3484				early	2.05451
		early	5.16008				early	1.50943
		early	8.62524				early	2.34801
		early	1.2806				early	1.97065
		early	12.0151				early	5.61845
		early	1.7284				early	0.90535
		early	23.0453				early	27.8189
		early	3.97496				early	2.77778
		early	1.18936				early	0.0925926
		early	5.47731				early	3.08642
		early	3.81847				early	1.48148
		early	3.7037				early	0.266667
		early	1.75926				early	1.23457
		middle	4.49735				middle	0.148148
		middle	3.7037				middle	4.44444
		middle	15.9259				middle	2.14815
		middle	3.96825				middle	0.148148
		middle	6.53061				middle	0.138889
		middle	7.34694				middle	0.277778
		middle	3.94558				middle	0.0694444
		middle	11.2472				middle	7.01389
		middle	5.62358				middle	0.0694444
		middle	7.61905				middle	3.26389
		middle	24.4898				middle	1.52778
		middle	9.24316				middle	1.34921
		middle	5.02415				middle	0.15873
		middle	1.41707				middle	0.0793651
		middle	4.15459				middle	0
		middle	29.0499				middle	9.68254
		middle	2.35105				middle	0.31746
		middle	0.901771				middle	0
		middle	8.18035				middle	2.30159
		middle	1.90016				middle	0
		middle	2.0934				middle	0.293501
		middle	2.4024				middle	0.293501
		middle	2.22222				middle	0.251572
		middle	13.9352				middle	2.53968
		middle	12.5				middle	1.0582
		middle	2.5463				middle	1.11111
		middle	7.26852				middle	2.53968
		middle	3.93519				middle	1.16402
		middle	1.15741				middle	1.26984
		middle	3.51852				middle	5.82011
		middle	7.82407				middle	0.42328
		middle	11.0331				middle	1.84127
		middle	2.7866				middle	0.42735
		middle	4.47972				middle	0.854701
		middle	2.68078				middle	0.25641
		middle	16.6667				middle	13.7566
		middle	17.9798				middle	15.3439
		middle	8.75421				middle	2.45614
		middle	15.9596				middle	10.1754
		middle	4.94949				middle	3.27485
		middle	1.54882				middle	1.87135
		middle	3.33333				middle	0.643275
		middle	17.7441				middle	23.7427
		middle	5.85859				middle	1.81287
		middle	7.54209				middle	2.51462
		middle	4.81481				middle	5.77778
		middle	8.84259				middle	7.11111
		middle	5.60185				middle	3.33333
		middle	12.1296				middle	7.77778
		middle	8.42593				middle	5.22222
		middle	2.08333				middle	2.66667
		middle	24.9074				middle	42
		middle	0.277778				middle	0.222222
		middle	6.85185				middle	5.22222
		middle	2.17494				middle	1.35501
		middle	0.851064				middle	1.57182
		middle	3.49882				middle	0.379404
		middle	1.04938				middle	0
		middle	2.96296				middle	2.83951
		middle	15.5556				middle	16.9231
		middle	3.07692				middle	3.07692
		middle	10.0926				middle	11.4444
		late	0.31746				late	0
		late	3.59788				late	1.90476
		late	1.0582				late	2.22222
		late	6.82927				late	1.18519
		late	1.30081				late	0.296296
		late	1.00271				late	0
		late	3.36043				late	0
		late	12.1951				late	1.33333
		late	2.24932				late	2.22222
		late	2.57453				late	1.77778
		late	11.1111				late	2.53968
		late	12.2892				late	2.53968
		late	64.8193				late	10.4762
		late	2.54351				late	0
		late	2.62383				late	0
		late	2.54351				late	0
		late	2.36287				late	0
		late	1.85185				late	0.246914
		late	13.9506				late	5.76132
		late	2.99383				late	0.0823045
		late	2.43827				late	0.329218
		late	24.7076				late	12.963
		late	10.0877				late	3.7037
		late	10.7545				late	8.44444
		late	15.5007				late	1.03704
		late	5.13032				late	0.592593
		late	0.401235				late	0
		late	2.37654				late	0
		late	15.3704				late	14.8148
		late	2.19136				late	4.07407
		late	15.4304				late	21.3333
		late	31.2676				late	15.5556
		late	4.88263				late	4.44444
		late	5.6025				late	0.444444
		late	1.56495				late	1.77778
		late	0.813772				late	0.888889
		late	17.3709				late	4
		late	3.38028				late	0.888889
		late	2.53561				late	0.173913
		late	10.5413				late	1.47826
		late	3.87464				late	0.434783
		late	1.11111				late	0.521739
		late	21.7949				late	2.78261
		late	3.21937				late	1.73913
		late	1.76638				late	2.43478
		late	2.25071				late	3.82609
		late	2.07977				late	3.82609
		late	3.36182				late	3.56522
		late	3.81766				late	2.86957
		late	0.946502				late	0.222222
		late	6.56863				late	1.5873
		late	2.0915				late	0.846561
		late	1.04575				late	0
		late	1.37255				late	0.21164
		late	5.6651				late	1.80556
		late	0.84507				late	0
		late	7.01095				late	9.02778
		late	17.5976				late	12.5926
		late	29.2492				late	7.85185

## Sheet: Figure 5–figure supplement 4C
Figure 5–figure supplement 4C	Data	Cumulative probability of the proportion of RS-LL neuron number in the pVLS at the early, middle, and late stages
	Softwear	matlab ver 2019
	Group	Number of CR-LL neurons in the pVLS; 49, 62, and 59 neurons for early, middle, and late stages, respectively.
	Dependent variable	Calculated number of event-related neurons
	Stats	Kruskalwallis test; χ2 = 26.418770046018686, p = 0.00000183331450763511 post hoc Tukey–Kramer test; early vs. middle; p = 0.000000891720281392949 early vs. late; p = 0.010344936123009 middle vs. late; p = 0.067463141848711
			Cumulative probability of the proportion
	Learning stage	early	6.81818
		early	7.95455
		early	7.38636
		early	9.65909
		early	6.81818
		early	10.2273
		early	7.38636
		early	8.52273
		early	7.95455
		early	9.65909
		early	8.52273
		early	5.68182
		early	8.52273
		early	10.2273
		early	5.68182
		early	8.52273
		early	8.52273
		early	9.65909
		early	9.65909
		early	10.2273
		middle	6.45161
		middle	4.83871
		middle	3.76344
		middle	6.98925
		middle	4.30108
		middle	5.37634
		middle	5.91398
		middle	5.91398
		middle	4.30108
		middle	6.98925
		middle	5.91398
		middle	6.98925
		middle	5.37634
		middle	5.37634
		middle	6.98925
		middle	5.91398
		middle	5.91398
		middle	6.45161
		middle	6.98925
		middle	4.30108
		late	7.109
		late	6.63507
		late	5.6872
		late	6.16114
		late	6.63507
		late	5.21327
		late	7.109
		late	7.109
		late	6.16114
		late	7.109
		late	7.109
		late	5.6872
		late	7.58294
		late	7.58294
		late	4.73934
		late	5.6872
		late	8.53081
		late	7.109
		late	6.63507
		late	7.58294
