# Supplementary material for: Acquisition of auditory discrimination mediated by different processes through two distinct circuits linked to the lateral striatum
Source: eLife. 2025 Jul 11;13:RP97326. doi: 10.7554/eLife.97326 (PMC12252547; doi:10.7554/eLife.97326)
Supplement: Figure 5—figure supplement 5—source data 1. [file elife-97326-fig5-figsupp5-data1.xlsx]

## Sheet: Figure 5–figure supplement 5A
Figure 5–figure supplement 5A	Data	Mean firing rate and auROC values of pVLS RS-HR neurons
	Softwear	matlab ver 2019
	Group	Number of RS-HR neurons in the aDLS; 6, 4, and 17 neurons for early, middle, and late stages, respectively.
	Stats
	Firing rate at early stage
				Time bin
				1	2	3	4	5	6	7	8	9	10	11	12	13	14	15	16	17	18	19	20	21	22	23	24	25	26	27	28	29	30	31	32	33	34	35	36	37	38	39	40	41	42	43	44	45	46
	Trial type	Mean	HR	5.72596	6.19889	5.22601	6.05554	6.20165	5.6757	6.14067	5.31019	6.0833	5.67008	6.83763	6.06997	6.41409	6.52232	5.76022	6.05969	5.56115	5.20166	5.61483	6.07533	6.5404	6.88977	6.45732	10.8369	10.5383	10.1715	10.6729	9.02937	9.84002	9.3253	9.43322	8.71893	8.39435	9.34842	9.18088	7.9516	7.76094	8.7243	6.19502	7.12816	6.67724	5.41579	7.39206	5.3904	7.29322	6.13561
			LR	5.48461	6.72709	6.27284	6.16655	6.74178	5.88582	6.41493	5.94628	4.83364	6.17116	5.94601	5.5832	5.24084	4.68247	6.11396	4.91339	4.79943	5.56847	5.66466	4.84443	5.71147	5.00907	6.6235	10.6193	10.7143	10.4846	10.1319	9.0581	8.36277	8.41724	9.0401	8.13504	9.40664	7.05022	6.80941	6.42624	6.38341	5.6841	6.36004	6.20716	5.48394	6.5628	4.9739	4.48624	4.25235	4.86805
			HL	5.38552	6.79854	4.71268	5.29349	5.68238	5.85073	5.5404	5.61111	4.23962	5.38384	5.22952	3.87823	3.51178	4.83558	4.39226	4.16891	4.61279	5.92368	5.72278	4.5881	5.97531	4.9119	5.74299	10.1869	10.8199	11.8569	12.275	11.193	7.97419	13.3092	10.5831	10.0022	10.7346	11.3502	11.8047	14.8171	10.5247	14.1751	11.0802	12.4136	9.58025	10.2121	7.88889	5.31481	8.23906	4.95679
			LL	6.49756	5.49333	4.33891	3.86302	4.96777	5.23918	4.88237	5.94433	4.99011	4.62252	3.79691	4.7862	4.904	4.53934	4.75218	4.50641	5.01502	4.41784	6.21682	5.63744	5.84847	4.856	5.18908	11.9227	10.2643	10.5875	11.2794	11.6494	11.6166	10.652	12.1018	10.0993	12.2118	13.6018	14.4242	13.9427	12.7369	11.8085	11.504	10.7383	10.633	8.68734	7.52792	6.33863	8.55416	5.14063
		s.e.m.	HR	1.39374	1.49301	1.25771	1.73999	1.90082	1.3737	2.07506	1.42738	2.02687	1.52608	3.07025	1.89246	2.15813	2.06884	2.13022	1.9875	2.19744	1.90332	1.93272	2.08338	2.57392	2.45819	2.27965	5.06168	5.40569	4.32432	4.54507	3.62612	3.60143	2.83938	3.23527	3.04325	2.79654	2.67566	2.57061	2.22764	2.32653	3.03873	2.1219	2.40804	2.16737	1.90591	2.50589	1.57791	2.52159	2.42382
			LR	1.73975	2.04534	2.23179	1.63263	2.42064	1.90365	2.57491	1.86562	1.50338	1.94975	2.64378	2.0819	1.49164	1.65736	1.67793	1.49748	1.63631	2.05102	1.78631	1.88993	2.57639	1.59941	2.09496	5.14773	5.75628	4.27325	5.13345	4.30008	2.83638	3.01631	2.92433	2.95128	2.87658	2.74048	2.317	1.93405	2.23765	1.83359	2.34124	2.07007	2.41136	2.24246	1.68787	1.73272	1.59716	1.76882
			HL	2.18498	1.72022	2.25191	1.67181	1.75764	2.59121	2.11214	2.58895	2.18905	2.02739	2.39571	1.4383	1.29996	1.66284	1.88157	1.29965	2.31908	2.33333	2.07757	1.60003	2.28805	1.67872	1.62755	5.19811	4.73419	6.72079	5.37765	3.25048	2.54867	6.49107	4.83147	4.34249	5.19567	5.99977	6.1587	7.26943	6.83237	9.54901	8.28759	7.80899	6.43469	5.73568	4.81553	3.674	3.7408	1.83749
			LL	2.96139	1.43323	1.70706	1.20802	1.78154	1.85793	1.38773	1.98276	2.18862	2.40358	1.35638	2.15325	1.67614	1.6361	1.83151	1.75008	1.69818	1.97118	2.54472	2.62399	2.36883	1.54417	1.46612	6.18219	5.71905	4.30109	4.33257	3.31831	4.11996	4.55196	4.48434	4.43893	6.08816	7.0383	7.2702	7.1295	7.32658	7.22477	7.34602	6.00145	5.19479	4.9711	3.76087	2.57686	1.97654	1.62362
		p value (vs. HR)	HR vs. LR	0.5625	0.5625	1	0.84375	0.6875	1	0.6875	0.6875	0.15625	0.6875	0.09375	0.15625	0.3125	0.03125	0.84375	0.8125	0.6875	0.4375	1	0.3125	0.0625	0.21875	0.5625	0.84375	0.6875	1	0.6875	1	0.4375	0.4375	0.6875	1	0.15625	0.5625	0.0625	0.21875	1	0.3125	1	1	0.4375	0.625	0.15625	1	0.3125	1
			HR vs. HL	1	0.6875	0.5625	0.6875	0.84375	1	0.09375	1	0.0625	0.6875	0.21875	0.03125	0.03125	0.09375	0.5625	0.21875	1	0.5625	0.84375	0.21875	1	0.3125	1	0.6875	0.84375	1	0.5625	0.3125	0.5625	1	0.6875	1	0.6875	0.6875	1	0.6875	0.8125	0.84375	0.4375	1	0.625	0.84375	0.625	0.4375	1	0.84375
			HR vs. LL	1	0.4375	0.5625	0.15625	0.3125	0.84375	0.3125	0.5625	0.4375	0.4375	0.15625	0.09375	0.15625	0.03125	0.6875	0.03125	0.5625	0.21875	0.5625	0.84375	1	0.8125	0.6875	0.5625	1	0.6875	0.4375	0.15625	1	0.6875	0.4375	1	0.84375	0.6875	0.5625	0.6875	1	0.8125	0.84375	1	1	0.84375	0.5625	0.5625	0.5625	0.6875
	Firing rate at middle stage
				Time bin
				1	2	3	4	5	6	7	8	9	10	11	12	13	14	15	16	17	18	19	20	21	22	23	24	25	26	27	28	29	30	31	32	33	34	35	36	37	38	39	40	41	42	43	44	45	46
	Trial type	Mean	HR	9.25373	9.91898	8.33902	9.83795	9.32836	7.91045	11.0938	13.9424	13.3326	12.5309	12.8294	15.3667	13.4328	13.806	14.6205	14.3966	11.9339	12.0896	12.9723	14.3156	13.209	13.1343	17.1642	30.3667	29.0299	29.0981	24.919	20.597	17.5373	9.77612	10.0746	7.22601	4.40299	3.12154	3.73134	4.02345	4.60768	3.94883	5.56503	4.39659	4.53305	3.73134	4.02345	4.1791	2.68017	2.7484
			LR	8.06452	10.0768	10.8065	10	10.8065	12.4194	11.5284	11.2903	12.3349	14.9923	14.0323	12.9032	15.1613	13.9478	16.5284	19.1859	14.6774	12.3349	14.6774	16.2903	16.4516	18.3794	15	32.4194	32.5806	27.7419	23.3871	20.3149	18.3026	11.9355	12.9032	8.70968	5.16129	4.51613	4.35484	6.12903	6.11367	5.06912	5.47619	3.54839	3.54839	3.94777	3.70968	3.54839	3.62519	2.25806
			HL	15.0943	11.8443	18.0943	16.75	19.8443	15.8443	17.1887	19.75	18.5	21.75	23.033	24.5	22.5943	24.5	21.5	22.783	19.25	23.25	19.783	18.25	27.3443	21.25	27.5	35.5943	38.8443	33.9717	23.5943	22.783	23.75	16.25	12.25	10.1887	12.9387	11.5943	6.84434	9.75	8.25	6.5	7	6.5	6.59434	5.59434	6	8.25	5.43868	7.59434
			LL	18.0208	19.76	17.0199	14.135	16.3225	16.1141	20.1449	21.7074	20.2808	19.2799	19.5516	21.9158	19.76	24.1667	24.5516	23.8089	21.4991	22.2283	21.4991	22.5408	19.5516	23.0933	25.5933	41.875	44.8324	36.0507	23.8949	24.4882	23.8949	16.635	16.6531	17.1105	19.2572	16.0417	16.2591	13.9266	15.2083	12.7083	11.3542	10.1766	9.55163	8.4375	8.47826	7.08333	4.47917	3.82246
		s.e.m.	HR	5.6454	5.53388	3.83184	4.84708	4.75176	4.10108	5.33074	6.87077	6.62684	6.43055	6.95648	8.47532	8.08546	7.6885	8.16499	7.91312	7.12704	7.35696	7.09678	8.01031	8.9489	7.69586	10.4018	26.1573	24.031	20.8395	20.3994	19.2242	16.073	7.62644	8.31132	5.19303	2.85637	1.08744	1.6952	1.61437	2.23039	2.36413	2.53349	2.07697	1.81075	1.88202	1.62811	1.65755	0.924914	0.692447
			LR	5.79748	5.90525	6.56553	6.6345	6.00251	5.77876	5.86283	6.85057	6.98601	7.12283	7.9992	7.25627	7.98238	7.34098	8.61123	10.2031	8.74892	6.76914	8.75684	9.23871	9.11064	8.8723	9.36179	24.1288	25.7923	24.0274	20.868	17.9622	17.3405	8.90268	8.92797	5.49019	2.94474	2.72449	2.34658	2.44963	1.91452	1.74386	2.32262	1.94442	2.14785	1.57381	1.58853	2.75613	2.44881	1.4546
			HL	6.72549	5.71539	9.2219	9.06803	10.5275	8.87398	10.0198	11.1383	9.77667	12.8541	13.242	13.1181	13.0132	14.2858	12.5797	12.8161	10.2662	12.7369	10.9003	10.4273	15.9434	12.645	16.5353	21.1391	22.4752	21.4423	20.4926	17.4571	17.9832	9.47255	6.98063	5.68135	7.25679	7.85508	4.10043	6.06046	5.39096	5.54527	5.70088	4.71699	4.93458	4.82144	4.41588	5.54339	4.53921	5.56362
			LL	10.0222	10.1816	9.04413	6.8128	8.61008	8.77625	11.2666	12.6119	11.9314	10.9615	11.0358	12.5155	11.5027	13.5026	13.8639	12.4765	12.0291	12.5416	11.7812	12.6408	10.5506	12.8944	14.8614	25.3463	25.5511	21.0497	19.3293	18.6544	16.726	9.55143	9.32094	9.56202	10.1903	10.826	11.8729	9.55979	10.0065	9.98045	8.63914	7.77968	7.41411	6.9355	5.59508	5.18467	3.93221	3.04728
		p value (vs. HR)	HR vs. LR	0.25	0.875	0.625	0.875	0.5	0.25	1	0.625	0.875	0.125	1	0.125	0.75	1	0.125	0.125	0.25	0.875	0.875	0.375	0.5	0.125	0.5	0.875	0.5	0.75	0.875	1	0.625	0.5	0.5	0.375	0.25	0.625	0.75	0.25	0.375	0.625	0.875	0.375	0.125	0.875	0.625	0.75	1	0.875
			HR vs. HL	0.125	0.875	0.625	1	0.375	0.375	1	1	0.625	0.625	0.375	0.25	0.375	0.5	0.625	0.375	0.25	0.25	0.625	0.375	0.125	0.5	0.25	0.875	0.875	0.25	0.625	1	0.5	0.5	1	0.875	0.375	0.625	0.375	0.625	0.625	0.875	1	0.875	0.875	1	0.875	0.5	1	0.625
			HR vs. LL	0.5	0.625	0.625	0.375	0.375	0.375	0.625	0.875	0.875	0.375	0.625	1	1	0.5	0.625	0.25	0.125	0.25	0.375	0.625	0.125	0.125	0.125	0.875	0.625	0.625	0.875	0.625	0.375	1	1	0.375	0.125	0.375	0.125	0.25	0.25	0.375	0.625	0.625	1	0.75	0.375	1	0.875	0.875
	Firing rate at late stage
				Time bin
				1	2	3	4	5	6	7	8	9	10	11	12	13	14	15	16	17	18	19	20	21	22	23	24	25	26	27	28	29	30	31	32	33	34	35	36	37	38	39	40	41	42	43	44	45	46
	Trial type	Mean	HR	5.79656	6.12536	5.34292	5.44786	5.82627	5.56784	5.45068	5.31105	5.65502	6.05533	6.09622	5.80459	6.10715	5.74903	6.17822	6.38457	7.10123	7.60757	7.54721	8.19678	9.44487	8.07436	9.50856	16.2433	15.4967	14.7087	13.5576	13.0683	11.4442	9.33344	9.46926	8.38686	7.61704	7.3531	8.65836	9.95143	10.7889	11.969	13.7424	17.1501	17.4364	18.2753	18.4094	16.5074	15.1707	13.6058
			LR	5.14251	5.27191	5.13593	3.57574	5.40828	6.46254	6.24918	5.00951	6.25806	6.01145	5.23927	5.38459	5.29903	5.89007	6.258	5.88668	7.02388	6.95823	7.52027	8.00143	9.12748	8.52609	10.7567	15.8228	14.011	13.7287	12.4207	13.8854	11.2783	8.37196	10.4717	7.41796	8.07366	7.43604	8.59433	7.27138	7.05981	7.92864	8.39773	8.31955	8.06914	7.49252	7.91764	8.56146	7.15819	6.7972
			HL	6.23641	4.83741	5.40658	6.7077	7.08095	7.04928	6.80722	7.6986	8.44183	7.04259	8.86588	9.99995	8.2347	7.95692	7.76364	8.63736	7.41506	9.07861	9.423	10.1325	11.6234	10.5453	13.627	16.5929	17.2777	13.9733	12.568	12.3503	12.6404	10.3396	8.52026	8.26388	6.50516	7.88409	6.89654	6.04033	7.09807	5.53411	5.03271	4.51862	6.38541	5.15479	5.6267	5.63347	6.5671	4.33375
			LL	5.58546	6.31646	6.32998	6.61617	6.71471	6.87661	6.7196	7.07987	7.1437	7.14636	7.90829	7.65427	8.38813	8.41153	8.54336	8.9961	9.31228	9.81148	9.42639	10.3836	10.4153	11.6022	12.008	16.6442	15.5848	15.21	14.1648	13.9219	12.1213	9.02194	8.67531	8.60889	8.20193	8.21452	9.3396	10.73	12.3859	12.8033	13.7127	14.0722	14.1475	14.2776	14.9047	15.1708	14.8384	15.7023
		s.e.m.	HR	2.30859	2.57364	2.33471	2.09573	2.22269	1.9851	2.11829	1.92761	2.06394	2.39081	2.11552	1.89708	1.89064	1.82295	2.24914	2.30465	2.63259	2.87886	3.10879	3.26297	3.24637	2.90973	3.77335	8.04246	7.49225	6.80359	6.64676	5.74542	4.49885	2.90125	2.28	1.64244	1.28298	1.50309	2.11808	2.72014	2.93504	3.45104	3.65249	4.1181	4.42939	4.74188	4.7206	4.43535	3.96591	3.91319
			LR	2.04043	1.87315	1.89697	1.25716	1.93375	2.96672	3.14071	2.28354	2.20389	2.78496	2.32405	2.54552	1.98419	2.49021	2.49197	2.47294	3.40345	3.38316	3.20381	3.0206	3.76278	3.89933	4.72108	7.60841	6.93021	6.46245	6.10521	5.89822	4.31614	2.07561	3.08926	1.98372	2.00305	1.94617	2.07214	2.30631	2.15638	2.41659	2.56212	2.41685	2.22461	2.45633	2.10353	2.41888	2.60113	2.24636
			HL	2.32077	1.39577	2.34183	2.38439	2.40909	2.42501	2.84829	2.90454	2.84138	2.49532	2.8967	3.20336	2.82539	3.05408	2.75686	3.55733	2.57961	3.46861	4.26772	3.89228	4.16864	3.75556	5.02175	7.8199	6.74815	6.1109	5.325	5.10702	4.90121	2.97225	2.26158	1.93617	1.39581	1.85092	1.98784	1.35333	2.14063	1.1815	1.65959	1.33852	2.12371	1.67336	2.1559	2.30533	2.30879	1.51097
			LL	2.166	2.75757	2.51313	2.77916	2.86648	3.07153	3.01463	2.88407	2.77591	2.72262	3.27971	3.08262	3.52129	3.28447	3.80276	3.73762	3.81546	4.14385	3.92449	4.30974	4.06001	4.65476	5.25654	7.55714	6.83367	6.39788	5.93465	5.80247	4.79741	2.91777	2.63737	2.53936	2.48631	2.65067	3.22475	3.76708	4.32179	4.83024	4.93581	5.11265	5.20899	4.90349	4.89588	4.45025	4.07896	4.07959
		p value (vs. HR)	HR vs. LR	0.407434	0.534925	0.64166	0.0979893	0.750549	0.554034	0.501447	0.234243	0.463044	0.463107	0.209675	0.246137	0.569494	0.407434	0.776358	0.561401	0.381097	0.148792	0.64166	0.917632	0.831287	0.434692	0.463044	0.981114	0.407434	0.905781	0.379375	0.717381	0.407434	0.463135	0.795954	0.331764	0.836139	0.876722	0.492459	0.652918	0.407434	0.355959	0.177293	0.0615039	0.135922	0.0394744	0.035157	0.135922	0.102434	0.0615039
			HR vs. HL	0.943392	0.463107	0.408044	0.760864	0.641604	0.794586	0.905768	0.351898	0.0683379	0.868406	0.463107	0.192985	0.407966	0.981114	0.943384	0.748901	0.492399	0.887053	0.679116	0.408044	0.434692	0.148735	0.0553589	0.652873	0.437967	0.22732	0.469113	0.408044	0.722526	0.610352	0.64166	0.794558	0.534925	0.717336	0.381163	0.052242	0.177293	0.035157	0.00860743	0.00193099	0.012946	0.0147723	0.00988213	0.0683766	0.0648276	0.0372359
			HR vs. LL	0.619154	0.876722	0.0879356	0.270569	0.56943	0.905794	0.619154	0.162603	0.381163	0.981117	0.687409	0.943392	0.64166	0.286827	0.554034	0.561401	0.905781	0.981117	0.943392	0.561401	0.407369	0.331764	0.868388	0.75828	0.619154	0.831287	0.795987	0.605095	0.162572	0.120544	0.0683379	0.276855	0.192985	0.492459	0.209675	0.381163	0.301054	0.331832	0.492459	0.0615039	0.286827	0.0615039	0.0394744	0.102434	0.554034	0.652918
	ROC value at early stage
				Time bin
				1	2	3	4	5	6	7	8	9	10	11	12	13	14	15	16	17	18	19	20	21	22	23	24	25
	Trial types compared Trials compared Trials compired	Mean	HR vs. HL	0.491627	0.525298	0.512571	0.508471	0.533794	0.552119	0.559629	0.533102	0.502748	0.515389	0.525769	0.513692	0.488707	0.425034	0.47959	0.465498	0.472416	0.425091	0.480818	0.480433	0.473474	0.51646	0.501555	0.49942	0.533994
			HR vs. LR	0.493232	0.487031	0.49217	0.494164	0.509706	0.531457	0.532843	0.508566	0.517544	0.516309	0.534499	0.506743	0.501818	0.50528	0.528849	0.511626	0.505034	0.542587	0.532753	0.51019	0.499063	0.532453	0.543207	0.552702	0.545872
			HR vs. LL	0.480223	0.530584	0.510796	0.500309	0.527954	0.559411	0.539774	0.536884	0.512399	0.490516	0.527302	0.4921	0.506115	0.431739	0.456704	0.438233	0.451248	0.420868	0.474868	0.476114	0.45778	0.501958	0.475028	0.491771	0.504368
		s.e.m.	HR vs. HL	0.0202787	0.0178041	0.0158834	0.0241801	0.0153693	0.0142299	0.0155677	0.024557	0.0293337	0.016001	0.0336586	0.0318087	0.0316009	0.0359536	0.0661565	0.0441635	0.0691953	0.0774308	0.0931295	0.0840693	0.0818495	0.0928516	0.0735856	0.0835487	0.0715764
			HR vs. LR	0.0146689	0.0105785	0.0281681	0.0130987	0.0148885	0.00435648	0.011171	0.0150486	0.0140601	0.0182805	0.0181857	0.0157193	0.0161758	0.0151156	0.0123762	0.019234	0.0214958	0.0210612	0.035652	0.0181435	0.0311202	0.027755	0.0349224	0.0510225	0.0645834
			HR vs. LL	0.0199299	0.016254	0.0244915	0.0196093	0.0251095	0.0245398	0.0095379	0.0216719	0.0278653	0.020857	0.0356663	0.0357327	0.0264055	0.0316382	0.0580924	0.0448346	0.0730813	0.0694193	0.0728062	0.0825218	0.0764483	0.0622871	0.0381193	0.0250286	0.0245103
		p value	HR vs. HL	1	0.363636	0.363636	0.363636	0.047619	0.0021645	0.0021645	0.047619	0.363636	1	1	0.363636	0.363636	0.363636	0.363636	0.363636	1	1	1	1	0.363636	0.047619	0.363636	1	1
			HR vs. LR	1	0.363636	0.363636	1	0.363636	0.0021645	0.0021645	1	0.363636	0.363636	0.363636	0.363636	0.363636	1	0.047619	0.047619	0.363636	0.363636	1	0.363636	0.681818	0.363636	1	0.363636	0.363636
			HR vs. LL	0.363636	0.047619	1	1	0.363636	0.047619	0.047619	0.363636	0.363636	0.363636	1	0.363636	1	0.047619	1	1	1	0.363636	1	0.363636	1	0.363636	1	0.363636	0.363636
	ROC value at middle stage
				Time bin
				1	2	3	4	5	6	7	8	9	10	11	12	13	14	15	16	17	18	19	20	21	22	23	24	25
	Trial types compared Trials compared Trials compired	Mean	HR vs. HL	0.450679	0.46895	0.412727	0.437804	0.440312	0.409582	0.421429	0.43606	0.391351	0.43649	0.369003	0.405691	0.446469	0.436768	0.375933	0.419124	0.353519	0.39515	0.440565	0.472055	0.460956	0.432396	0.453732	0.421202	0.405384
			HR vs. LR	0.513507	0.496793	0.47051	0.519658	0.481111	0.500763	0.480627	0.459796	0.487087	0.469188	0.443018	0.488285	0.496049	0.507976	0.473826	0.450571	0.474283	0.474022	0.459706	0.521699	0.516647	0.511395	0.513188	0.475366	0.481885
			HR vs. LL	0.433002	0.430411	0.41658	0.413103	0.439771	0.44018	0.414972	0.399807	0.399621	0.413928	0.411994	0.403074	0.417749	0.430109	0.394052	0.384906	0.30968	0.334556	0.341793	0.425107	0.439463	0.467532	0.515666	0.483285	0.470257
		s.e.m.	HR vs. HL	0.0507046	0.0570306	0.0600043	0.0596923	0.0509304	0.04754	0.0667264	0.0494537	0.0505617	0.0359195	0.0606944	0.0509455	0.0793078	0.0929852	0.0992222	0.108116	0.0901678	0.071537	0.0684434	0.0680478	0.0676898	0.072409	0.068772	0.0795122	0.0711232
			HR vs. LR	0.0283917	0.0394982	0.0234694	0.0159842	0.00976086	0.00875451	0.0228145	0.00423623	0.00923626	0.0217978	0.020479	0.0241216	0.0348632	0.0303571	0.0281558	0.0355655	0.0202847	0.0233051	0.0432158	0.024741	0.0185111	0.0251303	0.0261177	0.0381482	0.0371765
			HR vs. LL	0.0648377	0.055265	0.0545902	0.063363	0.0552916	0.0482113	0.0614106	0.0401645	0.0453767	0.0481274	0.0358206	0.0564849	0.0824339	0.0886537	0.111694	0.111285	0.0898728	0.0918713	0.0940588	0.0846433	0.0636909	0.0462576	0.0403848	0.0295153	0.0218035
		p value	HR vs. HL	1	1	0.314286	0.314286	0.314286	0.314286	0.314286	1	0.314286	0.314286	0.0285714	0.314286	1	1	0.714286	0.314286	1	1	1	1	1	1	1	1	0.314286
			HR vs. LR	0.314286	1	0.714286	0.314286	0.314286	1	0.314286	0.0285714	0.314286	0.314286	0.0285714	1	0.314286	1	0.314286	0.314286	0.314286	0.314286	1	0.314286	0.314286	0.314286	0.314286	1	0.714286
			HR vs. LL	1	1	0.314286	1	1	1	0.314286	0.0285714	0.0285714	0.714286	0.0285714	0.314286	0.314286	1	0.314286	1	0.0285714	0.0285714	0.314286	1	1	1	0.314286	0.314286	0.314286
	ROC value at late stage
				Time bin
				1	2	3	4	5	6	7	8	9	10	11	12	13	14	15	16	17	18	19	20	21	22	23	24	25
	Trial types compared Trials compared Trials compired	Mean	HR vs. HL	0.429135	0.455681	0.438572	0.441869	0.392482	0.384215	0.478751	0.462246	0.489355	0.485456	0.460486	0.482577	0.495969	0.509077	0.435959	0.481193	0.50172	0.509596	0.525134	0.648125	0.632228	0.637143	0.613024	0.604235	0.543077
			HR vs. LR	0.505239	0.513984	0.497404	0.490423	0.487548	0.514191	0.490164	0.501239	0.524754	0.495652	0.48658	0.488149	0.507921	0.516976	0.522622	0.515806	0.514052	0.516404	0.577226	0.603283	0.627111	0.634444	0.633105	0.60559	0.601184
			HR vs. LL	0.504293	0.485033	0.489814	0.474122	0.475141	0.470819	0.469183	0.473416	0.484784	0.475129	0.482445	0.479836	0.496228	0.49072	0.511388	0.530232	0.512857	0.503662	0.511178	0.541188	0.551624	0.529931	0.499345	0.501594	0.525258
		s.e.m.	HR vs. HL	0.0486263	0.0459525	0.0443527	0.0409125	0.0426502	0.0408872	0.0324907	0.0351877	0.0347365	0.0376655	0.0341162	0.0356998	0.0413623	0.0392387	0.0357382	0.0406107	0.0397737	0.0439512	0.0536333	0.0474921	0.061437	0.0628123	0.0637342	0.0644838	0.060186
			HR vs. LR	0.012871	0.0134443	0.0134663	0.0156085	0.0153915	0.013999	0.0240743	0.0166728	0.0179928	0.0189311	0.0233182	0.0234693	0.022788	0.0132126	0.028121	0.0328749	0.0396622	0.0419177	0.0439136	0.0475341	0.0584321	0.0617863	0.0564753	0.0527658	0.0547255
			HR vs. LL	0.00887713	0.0119496	0.0151831	0.0165799	0.0181734	0.0215351	0.0231218	0.0237547	0.0237243	0.0212585	0.0246119	0.0226893	0.0302587	0.0322212	0.0297599	0.0307504	0.0303839	0.0267805	0.0323328	0.0371957	0.0414431	0.0334182	0.0331748	0.0300439	0.0295126
		p value	HR vs. HL	0.357379	0.21118	0.768322	0.357337	0.357379	0.122051	0.357337	0.538078	0.0298499	0.538078	0.768342	1	0.122051	0.00514314	0.357379	0.357337	0.538078	0.122051	0.357379	0.00514314	0.0298499	0.357379	0.0298499	0.000617563	0.0298499
			HR vs. LR	0.176877	0.745511	1	0.176877	0.507369	0.00642194	0.507369	0.507369	0.00642194	0.306012	1	0.176809	0.507369	0.0415571	0.0415571	0.507302	0.306012	0.176877	0.176877	0.0415571	0.176877	0.0415571	0.0415571	0.000642719	0.00642194
			HR vs. LL	0.122051	0.122051	0.768342	0.768342	0.357379	0.357379	0.768361	0.357379	0.0298499	0.357379	0.357337	0.357337	0.357379	0.768361	0.0298499	0.0298356	0.0298499	0.0298499	0.122051	0.122051	0.00514314	0.000617563	0.357379	0.357379	0.357379
[truncated: 4 more columns]

## Sheet: Figure 5–figure supplement 5B
Figure 5–figure supplement 5B	Data	Mean firing rate and auROC values of pVLS RS-LL neurons
	Softwear	matlab ver 2019
	Group	Number of RS-LL neurons in the pVLS; 3, 5, and 15 neurons for early, middle, and late stages, respectively.
	Stats
	Firing rate at early stage
				Time bin
				1	2	3	4	5	6	7	8	9	10	11	12	13	14	15	16	17	18	19	20	21	22	23	24	25	26	27	28	29	30	31	32	33	34	35	36	37	38	39	40	41	42	43	44	45	46
	Trial type	Mean	HR	6.18675	6.10329	4.97653	6.09285	6.37454	6.37454	6.29108	5.52947	6.56234	5.24778	7.79343	5.8216	5.7277	6.00939	4.50704	4.41315	4.31925	4.50704	5.16432	5.53991	6.65623	5.16432	5.34168	12.9369	11.7371	11.0694	12.1022	10.2347	12.3005	11.6432	12.4883	11.6432	10.7981	10.4121	9.67136	7.41784	5.8216	8.98279	4.41315	4.69484	5.91549	2.8169	3.19249	2.71257	1.97183	1.22066
			LR	6.05128	7.20879	5.67033	7.00366	8.64469	5.84615	8.98168	6.28571	4.61538	6.69597	6.5641	5.84615	3.58974	5.77289	4.30769	3.17949	4.95238	5.23077	6.10989	3.58974	5.84615	3.58974	5.4652	15.1941	12.8205	10.7985	12.2051	13.1575	11.619	12.2344	11.6923	11.3846	11.5897	10.1538	9.67033	7.38462	8.64469	6.69597	6.69597	5.56777	4.54212	4.20513	3.17949	2.25641	1.4359	1.4359
			HL	5.34113	6.55945	5.25341	4.99025	4.60039	7.01754	6.53996	6.2768	5.34113	5.44834	5.81871	3.59649	3.05068	4.33723	5.16569	2.85575	5.99415	6.7154	5.7115	4.60039	6.99805	3.50877	5.03899	11.3548	11.1793	15.692	13.4211	12.0078	10.4581	21.2865	17.4756	14.7953	17.2125	17.5828	18.3236	23.4016	18.6062	24.7076	19.4347	21.8324	16.7349	15.078	11.3743	8.58674	9.80507	5.62378
			LL	7.58889	5.16667	4.8	4.61111	5.07778	5.25556	4.25556	4.52222	4.98889	5.63333	3.87778	5	4.52222	4.43333	4.52222	4.24444	5.07778	4.43333	6.83333	5.73333	5.27778	3.77778	3.41111	14.3222	13.1444	10.9889	12.1222	13.5	16.2	16.1	17.0222	14.5333	18.3111	20.8	21.4556	22.1	19.8889	18.0333	18.7667	16.9222	14.4222	12.6444	9.23333	6.55556	6.18889	2.11111
		s.e.m.	HR	2.78175	3.57918	3.01787	3.57741	3.72274	2.84942	4.82541	2.74863	4.04642	2.87049	6.83127	4.36493	4.6467	4.92578	4.09179	3.99806	4.17919	4.36695	4.61242	4.72012	5.13799	5.16432	4.12791	10.493	11.5965	9.68842	9.86438	7.96131	7.50998	5.93186	6.2489	5.96521	5.40457	4.1915	4.98714	3.71693	2.98261	1.20287	2.24372	2.39759	3.33697	2.0313	1.96062	0.619775	1.22786	0.834572
			LR	3.97361	3.79459	2.85726	3.30659	4.9346	4.66977	5.1512	3.62817	3.4584	3.88287	5.95932	4.53259	3.13953	3.43367	4.00394	2.73098	3.11275	4.48359	3.2924	3.28686	5.24282	3.28686	3.78468	10.0375	12.667	9.40619	11.5952	8.56163	5.22223	5.0139	5.85694	5.74817	5.9088	5.13947	3.65787	3.79764	2.92765	1.92762	2.11497	1.49113	0.952381	2.24941	1.77942	1.33333	0.717949	0.7396
			HL	4.57442	4.08124	4.61119	3.16589	2.70618	5.3907	4.50913	5.75851	4.57442	4.49901	5.42876	2.64783	2.92009	3.38821	4.08386	2.47154	4.78107	4.98885	4.36856	3.25816	4.83443	3.24917	3.68755	10.4473	9.96606	14.3963	12.1915	7.54472	5.13767	12.0369	8.10535	8.03755	9.18813	11.7061	11.9786	13.4612	12.8365	18.4985	16.4579	14.6048	12.33	11.476	9.87708	7.37353	7.91682	3.35023
			LL	6.63454	3.2674	3.85059	2.34981	4.12833	4.04495	3.31363	4.00076	4.5947	5.10929	3.06113	4.58964	3.57286	3.61668	4.00076	3.72386	3.71515	4.03994	5.3342	5.46883	5.27778	3.13483	2.46203	12.8444	12.5955	9.94132	10.2209	7.60908	8.19582	8.45833	8.484	8.88221	11.3611	13.3129	14.2455	13.375	14.4406	14.766	14.4261	11.7438	10.7751	9.92857	7.88897	5.47413	3.35362	1.49485
		p value (vs. HR)	LL vs. HR	1	0.75	1	0.5	0.25	0.75	0.5	0.75	0.25	1	0.5	0.5	0.5	0.5	1	1	0.5	1	0.25	0.75	0.25	1	0.5	0.75	0.25	0.75	1	0.25	0.75	0.75	0.25	0.75	0.75	0.25	0.25	0.25	0.25	1	0.25	0.25	0.75	0.75	0.75	1	0.25	0.75
			LL vs. LR	0.75	0.25	0.5	0.25	0.25	0.5	0.25	0.25	0.75	0.5	0.75	0.5	0.5	0.25	0.75	0.5	1	0.5	0.75	0.75	0.5	1	0.5	1	0.25	1	1	1	1	1	0.25	0.75	0.75	0.5	0.5	0.25	1	1	1	0.75	0.75	0.75	0.75	0.75	0.25	0.75
			LL vs. HL	0.5	0.5	0.75	1	1	0.5	0.25	1	0.5	0.75	1	1	0.25	0.75	0.5	0.5	0.75	0.25	0.5	1	0.25	1	0.5	0.25	1	0.5	1	0.5	0.25	0.5	0.75	1	0.75	0.25	0.5	0.75	0.75	0.5	1	0.5	0.5	0.5	0.5	0.5	1	0.5
	Firing rate at middle stage
				Time bin
				1	2	3	4	5	6	7	8	9	10	11	12	13	14	15	16	17	18	19	20	21	22	23	24	25	26	27	28	29	30	31	32	33	34	35	36	37	38	39	40	41	42	43	44	45	46
	Trial type	Mean	HR	14.4787	14.4512	12.7536	15.0543	12.3856	13.7286	13.3495	14.3409	14.6227	14.18	14.55	16.0178	16.1211	15.3703	14.7637	15.2801	14.5538	14.1027	14.933	16.4609	16.4694	14.5634	15.416	30.8392	27.4858	25.3353	25.2168	23.5542	20.8312	14.1737	15.9054	12.5069	11.4182	8.66459	11.7143	11.3053	12.4703	12.4343	13.6801	10.4605	10.1992	11.0887	12.0281	10.4818	10.5831	10.8604
			LR	13.0893	15.0203	14.5024	14.1377	16.7832	13.7723	15.5377	15.2871	14.6128	17.6198	16.8053	14.8239	14.6235	13.8579	13.8613	17.3151	14.9395	13.2082	16.7013	15.7364	16.1504	16.0031	16.5755	32.1007	32.8222	27.2158	25.0537	24.0704	20.5648	16.6237	16.6858	16.5673	11.7735	13.0347	11.3961	15.058	12.742	11.1014	13.5221	14.2101	11.6847	10.5986	11.3075	11.3989	8.81135	10.2696
			HL	14.7712	11.0615	15.1846	10.7846	16.4154	10.2481	11.2615	13.8923	16.9538	11.3231	16.1077	16.7558	15.2635	15.7385	14.5231	13.7712	14.1538	16.2923	15.9846	14.6923	19.5712	17.3846	21.9538	26.0923	26.6462	27.8923	26.7231	28	32.8462	28.1385	24.1865	22.9231	23.2769	24.7885	16.6808	21.1269	19.3269	20.4115	19.525	17.7577	19.4212	17.6404	19.3788	22.4962	17.3827	20.6654
			LL	13.5449	15.6529	14.9744	12.9687	13.567	13.6048	14.1147	15.0938	14.7552	13.0833	13.0388	14.3016	14.0847	16.9625	17.4368	16.5728	16.7094	17.9488	16.4435	16.638	15.3135	18.4792	18.9943	29.7054	28.3404	26.0031	26.2634	31.8413	34.7949	29.2437	28.8333	29.2143	31.7776	30.7136	28.3532	29.4267	27.5753	26.5843	25.3045	23.8481	21.8737	21.4782	19.2161	19.1594	16.0543	14.69
		s.e.m.	HR	7.31655	6.9423	6.15078	8.15948	5.9478	7.90145	7.27908	7.31993	8.28023	7.45125	8.56541	8.66431	8.95917	8.22545	8.17171	8.44246	8.74931	7.98327	8.75005	9.36292	9.30349	8.82278	9.25871	21.1175	19.3581	17.3216	16.8584	15.4383	12.8513	6.93838	7.63215	5.5107	5.06227	3.94072	5.37458	5.0051	5.71474	6.61004	6.80616	5.15983	4.74258	5.38002	5.81634	5.40083	6.52559	5.81722
			LR	6.43899	7.7751	7.33388	7.67454	9.38064	6.93496	8.69471	7.97694	8.16174	10.1736	9.883	8.65715	8.07987	7.70145	7.58654	9.58498	8.46826	7.92945	9.31761	9.14491	9.11843	8.61004	9.56672	20.433	21.4953	19.2698	16.8567	14.7718	13.4827	7.35515	6.75973	6.02561	5.86078	5.74589	4.88835	6.70446	5.36484	4.50682	6.29863	8.25699	5.062	4.87242	6.47345	5.68048	4.02495	5.83308
			HL	7.08528	5.60855	8.19321	5.3582	9.1801	5.43225	6.18466	7.93508	8.68112	6.38301	9.25329	9.11648	8.12684	9.44249	8.61931	8.22072	8.13354	9.07602	9.6197	8.89871	12.8446	10.5908	13.705	16.8713	16.4308	17.9727	16.1052	12.8663	12.5494	7.9207	6.72025	7.22459	6.04067	7.93747	5.37407	6.46222	6.65639	7.67778	7.51518	6.60575	7.10509	6.513	7.18382	8.06206	6.49069	8.54277
			LL	7.42785	8.45159	8.29458	6.70722	7.24063	7.15796	7.91824	8.0929	8.43035	7.85016	7.59513	8.36062	8.17886	9.84618	10.0413	9.62859	9.95771	10.5194	9.57742	10.0359	8.9432	10.911	12.0991	20.2698	18.6047	16.8318	15.5649	13.627	11.8507	7.61942	7.7161	8.20767	9.04735	9.67418	9.18881	9.90566	8.40388	8.61024	7.77498	6.91491	6.04377	5.33858	3.51456	4.12571	4.03835	5.58284
		p value (vs. HR)	LL vs. HR	0.4375	1	0.625	1	0.625	1	0.625	0.8125	0.875	0.625	0.625	0.0625	0.125	0.625	0.625	0.625	1	0.8125	0.8125	0.875	0.625	0.125	0.4375	0.4375	1	1	0.375	0.125	0.125	0.1875	0.4375	0.3125	0.125	0.0625	0.0625	0.0625	0.125	0.1875	0.1875	0.0625	0.125	0.1875	0.1875	0.3125	0.625	0.625
			LL vs. LR	0.8125	1	0.8125	0.3125	0.3125	0.8125	0.4375	1	1	0.1875	0.125	0.875	0.625	0.625	0.4375	0.4375	0.8125	0.1875	0.625	1	0.625	0.8125	1	0.4375	0.3125	0.875	0.625	0.125	0.125	0.1875	0.25	0.3125	0.0625	0.0625	0.0625	0.3125	0.1875	0.125	0.1875	0.3125	0.3125	0.125	0.3125	0.1875	0.3125	1
			LL vs. HL	0.4375	0.375	1	0.375	0.625	0.1875	0.4375	0.1875	0.125	0.5	0.25	0.3125	0.8125	0.375	0.125	0.125	0.375	0.625	0.625	0.375	0.875	0.875	0.3125	0.625	0.625	0.375	0.875	0.125	0.75	0.625	0.625	0.25	0.1875	0.0625	0.0625	0.1875	0.125	0.0625	0.125	0.125	0.8125	0.4375	1	0.4375	0.625	0.4375
	Firing rate at late stage
				Time bin
				1	2	3	4	5	6	7	8	9	10	11	12	13	14	15	16	17	18	19	20	21	22	23	24	25	26	27	28	29	30	31	32	33	34	35	36	37	38	39	40	41	42	43	44	45	46
	Trial type	Mean	HR	5.67826	5.99392	5.24744	5.48259	5.79098	5.40766	5.67918	5.28665	5.39462	6.1072	6.17419	5.83431	6.05731	5.77905	6.43212	6.51218	7.32421	7.9375	7.99099	8.55441	9.83006	8.06426	9.94464	17.0269	16.4235	15.513	14.8961	13.6476	12.0515	9.57777	9.89506	8.62726	7.87771	7.61061	8.84233	10.5536	11.3089	12.2092	13.3455	15.8424	14.3729	15.7986	15.4265	15.1721	15.3459	14.4178
			LR	5.51629	5.19705	5.52052	3.62813	5.56603	6.86761	7.21404	5.29982	6.60273	6.14241	5.37839	5.85302	5.10498	6.1413	6.33996	6.17839	7.32687	7.41816	7.95182	8.13456	9.40295	8.93099	11.8255	16.876	14.6735	14.8399	14.0612	14.2767	11.6106	7.76892	10.786	7.58441	8.24957	6.11378	8.29981	6.66321	6.91924	7.20813	8.10142	8.52342	7.95996	7.43453	7.80351	8.43559	8.32899	7.37555
			HL	6.59386	4.8898	5.67375	7.68169	7.81026	7.50585	7.48151	8.10285	9.04518	6.97975	9.57393	9.96105	9.08081	7.83266	8.0025	9.57234	8.2704	10.2298	10.3831	12.1797	13.8584	12.4402	16.3217	19.7478	18.7648	15.6771	14.7512	14.1044	14.3993	10.4272	10.115	8.2025	7.3741	9.32049	7.43089	7.7346	7.70373	5.8868	6.85929	4.97851	7.13866	5.73548	6.88063	6.4346	7.42049	4.19756
			LL	5.89909	6.39006	6.93306	7.07524	7.31196	7.33152	7.43121	7.6589	7.68008	7.43994	8.64172	8.2222	9.1309	8.86889	9.31582	9.8718	10.2277	10.699	10.4196	11.4332	11.4328	13.0085	13.4388	18.0763	16.9282	16.6881	16.0973	14.8316	13.1096	9.82703	9.75879	9.85123	9.46137	9.63217	11.4292	13.236	15.8682	17.0076	17.8326	18.2411	18.1329	17.3516	17.0002	16.308	14.3929	14.233
		s.e.m.	HR	2.64667	2.93912	2.66858	2.34433	2.52735	2.25976	2.40268	2.19822	2.31803	2.71125	2.39274	2.15985	2.13488	2.05173	2.5286	2.61594	2.99306	3.26497	3.50562	3.69146	3.67198	3.30314	4.25812	9.1156	8.49866	7.71452	7.47944	6.4967	5.09345	3.2683	2.55517	1.80423	1.44382	1.68563	2.4146	3.07353	3.34516	3.97379	4.23131	4.70332	4.65598	5.25006	4.96185	4.89132	4.44334	4.46514
			LR	2.28234	2.10026	2.11049	1.41872	2.18022	3.35851	3.51367	2.56574	2.49071	3.12854	2.61835	2.84065	2.17475	2.77838	2.8215	2.78945	3.84886	3.81844	3.59474	3.41708	4.24171	4.40508	5.24958	8.54991	7.86849	7.27879	6.82465	6.69933	4.89819	2.3562	3.50479	2.22273	2.2742	2.28711	2.42283	2.68096	2.4708	2.79015	2.9304	2.75672	2.57522	2.80359	2.36785	2.77546	2.88289	2.52429
			HL	2.59888	1.58427	2.64874	2.63469	2.67856	2.72391	3.17844	3.26928	3.19904	2.81154	3.22792	3.58236	3.14138	3.44727	3.09979	3.98972	2.86785	3.85816	4.79416	4.29887	4.60784	4.27449	5.53112	8.70717	7.5582	6.82094	5.88149	5.66168	5.41123	3.4449	2.40806	2.18852	1.50019	1.90156	2.18388	1.68868	2.42055	1.31663	2.21226	1.51674	2.39823	2.01518	2.40688	2.6285	2.52133	1.69837
			LL	2.42041	3.10455	2.80137	3.11015	3.20719	3.45166	3.37653	3.22738	3.0928	3.07098	3.6615	3.45767	3.93364	3.68235	4.27162	4.17821	4.26341	4.6543	4.39435	4.82613	4.541	5.19414	5.88484	8.51209	7.66511	7.16079	6.58969	6.54249	5.38578	3.23156	2.87667	2.74239	2.68619	2.89239	3.49221	4.04963	4.71601	5.22134	5.37715	5.53923	5.68011	5.53201	5.56684	5.13884	4.81256	4.66784
		p value (vs. HR)	LL vs. HR	0.454285	0.359131	0.00305176	0.0784912	0.135376	0.330261	0.229309	0.0553589	0.0124512	0.719727	0.25238	0.638672	0.501587	0.120544	1	0.120544	0.330261	0.421204	0.599487	0.325806	0.934082	0.0494385	0.330261	0.390991	0.846924	0.760864	0.760864	0.946045	0.357544	0.357544	0.541626	0.846924	0.855225	0.719727	0.599487	0.524475	0.761536	0.302795	0.302795	0.934082	0.524475	0.678772	0.638672	0.761536	0.168823	0.638672
			LL vs. LR	0.302795	0.463135	0.325806	0.029541	0.131653	0.44574	0.210815	0.153076	0.524475	0.229309	0.0206299	0.067627	0.0288086	0.0301514	0.261108	0.0255737	0.0615234	0.0410156	0.302795	0.0494385	0.625732	0.057373	0.295776	0.6698	0.25238	0.541626	0.454834	0.786865	0.583008	0.541626	1	0.760864	0.855225	0.276855	0.599487	0.0946045	0.168823	0.0553589	0.187622	0.168823	0.151428	0.0553589	0.168823	0.106995	0.229309	0.106995
			LL vs. HL	0.890381	0.807739	0.210571	0.444336	0.903198	0.761536	0.735352	0.903198	0.33728	0.330261	0.966187	0.6698	0.903198	0.561401	0.325806	0.628296	0.302795	0.518555	0.945557	0.855225	0.138977	0.735352	0.0255737	0.357544	0.187622	0.625732	0.390991	0.587891	0.42627	0.903198	0.541626	0.807739	0.807739	0.846924	0.330261	0.488708	0.0353394	0.00836182	0.00506592	0.00201416	0.00671387	0.0255737	0.0637207	0.0366211	0.229309	0.0412598
	ROC value at early stage
				Time bin
				1	2	3	4	5	6	7	8	9	10	11	12	13	14	15	16	17	18	19	20	21	22	23	24	25
	Trial types compared Trials compared Trials compired	Mean	LL vs. HR	0.507823	0.489158	0.46859	0.459533	0.463031	0.452578	0.483865	0.508095	0.527586	0.536585	0.463035	0.499074	0.509874	0.555214	0.603959	0.597672	0.638271	0.701185	0.580754	0.650325	0.630219	0.56525	0.570133	0.563372	0.508192
			LL vs. LR	0.485571	0.457424	0.461145	0.404319	0.48174	0.479316	0.505421	0.52515	0.499759	0.518791	0.500021	0.463651	0.501123	0.530867	0.593959	0.611111	0.649017	0.689835	0.602408	0.606935	0.607848	0.577863	0.576346	0.519121	0.470397
			LL vs. HL	0.507485	0.508894	0.499077	0.448408	0.498519	0.493509	0.536105	0.505899	0.455144	0.518561	0.476299	0.515708	0.47164	0.510533	0.515041	0.496893	0.553949	0.507393	0.470181	0.445309	0.447829	0.448997	0.435413	0.404474	0.427874
		s.e.m.	LL vs. HR	0.0366076	0.00694325	0.0321337	0.00903722	0.0379386	0.0294888	0.0256624	0.0208851	0.00899376	0.0194597	0.0102004	0.0177669	0.0087911	0.0462141	0.0971157	0.0750815	0.113235	0.0999819	0.133626	0.125784	0.135895	0.109293	0.050302	0.0137555	0.0209476
			LL vs. LR	0.0219035	0.0169073	0.0161534	0.0365404	0.0291869	0.0190687	0.0176894	0.022829	0.0130587	0.056156	0.0160936	0.0500951	0.0075801	0.0509938	0.102377	0.0764117	0.110185	0.110868	0.118086	0.136533	0.131882	0.107291	0.0377315	0.0380318	0.00184779
			LL vs. HL	0.0170366	0.00442667	0.0187959	0.0213574	0.0177553	0.00842364	0.0155756	0.01556	0.0201961	0.0342787	0.0155772	0.0193357	0.010681	0.0360589	0.00908216	0.035305	0.0475214	0.0235584	0.0299348	0.0389881	0.038226	0.04213	0.045298	0.0689237	0.0595848
		p value	LL vs. HR	0.7	0.7	0.7	0.1	0.7	0.7	0.7	0.7	0.1	0.7	0.1	0.7	0.7	0.7	0.7	0.7	0.7	0.1	0.7	0.7	0.7	0.7	0.7	0.1	0.7
			LL vs. LR	0.7	0.1	0.1	0.1	0.7	0.7	0.7	0.7	0.7	0.7	0.7	0.7	0.7	0.7	0.7	0.1	0.7	0.1	0.7	0.7	0.7	0.7	0.1	0.7	0.1
			LL vs. HL	0.7	0.1	0.7	0.1	0.7	0.7	0.1	0.7	0.1	0.7	0.7	0.7	0.1	0.7	0.1	0.7	0.7	0.7	0.7	0.7	0.7	0.7	0.7	0.7	0.7
	ROC value at middle stage
				Time bin
				1	2	3	4	5	6	7	8	9	10	11	12	13	14	15	16	17	18	19	20	21	22	23	24	25
	Trial types compared Trials compared Trials compired	Mean	LL vs. HR	0.49141	0.496576	0.515035	0.532772	0.493019	0.4686	0.492429	0.525827	0.529039	0.493415	0.516481	0.513385	0.514254	0.63888	0.725298	0.676555	0.751943	0.732132	0.73091	0.708534	0.694656	0.644285	0.585975	0.577132	0.568683
			LL vs. LR	0.489163	0.497267	0.483401	0.51273	0.472919	0.462024	0.523385	0.519936	0.540556	0.48281	0.515637	0.485057	0.472963	0.624479	0.716086	0.654053	0.72377	0.697539	0.723341	0.676332	0.689145	0.637176	0.589656	0.532275	0.578877
			LL vs. HL	0.514837	0.540994	0.523179	0.539591	0.485773	0.446635	0.50983	0.552841	0.515198	0.507504	0.489328	0.474094	0.503479	0.520707	0.539235	0.580892	0.597585	0.648472	0.652996	0.606371	0.560494	0.495863	0.449102	0.445623	0.480205
		s.e.m.	LL vs. HR	0.0286256	0.0407582	0.0242344	0.0195642	0.0153524	0.0220801	0.0168103	0.0266941	0.0279925	0.0387154	0.0226664	0.0168054	0.0389024	0.0733649	0.0858546	0.101209	0.0765768	0.0806054	0.0853268	0.0748384	0.0711216	0.0905744	0.095057	0.0703041	0.0528666
			LL vs. LR	0.0239342	0.0208088	0.0341043	0.0214942	0.0151672	0.0268763	0.0278104	0.0178391	0.0269828	0.019096	0.0211703	0.0361911	0.0350117	0.0696804	0.0898066	0.0937802	0.0789112	0.0892268	0.0816438	0.0947988	0.0728827	0.0938012	0.0889929	0.105417	0.0912564
			LL vs. HL	0.0287395	0.0220556	0.0126799	0.0227913	0.0163359	0.012911	0.0108571	0.0162406	0.0247905	0.013246	0.0375858	0.02686	0.0148535	0.012932	0.0536024	0.056522	0.0372534	0.0564769	0.0448289	0.0507635	0.071756	0.101493	0.117457	0.125517	0.125039
		p value	LL vs. HR	0.126984	0.126984	0.68254	0.126984	0.126984	0.126984	0.126984	0.68254	0.68254	0.68254	1	0.68254	1	0.325397	0.00793651	0.68254	0.00793651	0.00793651	0.126984	0.126984	0.00793651	0.68254	0.68254	0.68254	0.68254
			LL vs. LR	0.68254	0.68254	0.68254	0.68254	0.126984	0.325397	0.68254	0.68254	0.68254	0.126984	0.68254	0.126984	0.68254	0.68254	0.68254	0.68254	0.00793651	0.126984	0.126984	0.126984	0.126984	0.126984	0.68254	0.68254	0.126984
			LL vs. HL	0.68254	0.126984	0.126984	0.126984	1	0.00793651	0.68254	0.126984	0.126984	1	0.68254	0.68254	0.325397	0.325397	0.68254	0.126984	0.126984	0.126984	0.00793651	0.126984	0.68254	0.126984	0.126984	0.126984	0.68254
	ROC value at late stage
				Time bin
				1	2	3	4	5	6	7	8	9	10	11	12	13	14	15	16	17	18	19	20	21	22	23	24	25
	Trial types compared Trials compared Trials compired	Mean	LL vs. HR	0.504449	0.532419	0.524183	0.539845	0.537968	0.544461	0.545581	0.53839	0.529258	0.536265	0.537778	0.536921	0.520042	0.521176	0.497208	0.496112	0.515679	0.542513	0.556507	0.541375	0.531085	0.513586	0.474317	0.457068	0.442112
			LL vs. LR	0.498681	0.542454	0.513723	0.516422	0.527571	0.563944	0.567035	0.564154	0.564018	0.546192	0.53992	0.519253	0.532945	0.553364	0.544168	0.529763	0.556763	0.583743	0.654243	0.648351	0.649825	0.644687	0.622376	0.593648	0.562909
			LL vs. HL	0.40808	0.460933	0.438286	0.46005	0.420914	0.418189	0.519029	0.504809	0.509198	0.502794	0.474417	0.469735	0.492854	0.485907	0.410925	0.467258	0.502369	0.523119	0.576131	0.667034	0.632629	0.623356	0.604414	0.565576	0.483076
		s.e.m.	LL vs. HR	0.00943279	0.0131186	0.0162067	0.0180562	0.0195424	0.0237856	0.0251407	0.0258406	0.0260859	0.0248161	0.0261849	0.0253608	0.0353416	0.0359491	0.0331805	0.0363613	0.03408	0.0314264	0.043095	0.0439044	0.0435068	0.037504	0.0333	0.0210857	0.0255643
			LL vs. LR	0.0131228	0.0216051	0.01621	0.020668	0.0222328	0.0215916	0.0196678	0.0240479	0.0327075	0.0261887	0.0314605	0.03338	0.0422819	0.0441065	0.0552088	0.0612157	0.0609356	0.0584739	0.056809	0.0579201	0.0627519	0.0563186	0.0596708	0.0578263	0.0535206
			LL vs. HL	0.0560161	0.0490057	0.0488933	0.0442359	0.0460104	0.0462834	0.030856	0.030581	0.0364835	0.0347057	0.0381854	0.0318808	0.0331715	0.0418501	0.0526011	0.0554796	0.055705	0.0604818	0.0632609	0.0539562	0.06402	0.0674713	0.0674096	0.0647226	0.0599213
		p value	LL vs. HR	0.756318	0.000277796	0.0211537	0.100951	0.0211537	0.756318	0.329417	0.756318	0.756318	0.329417	0.329417	0.0211537	0.756318	0.184117	0.0451203	0.329417	0.756318	0.756318	0.756318	0.756318	0.329417	0.100951	0.100951	0.100951	0.0211537
			LL vs. LR	1	0.0285031	0.477995	0.0633959	0.477995	0.000241554	0.0033823	0.0033823	0.0285031	0.477995	0.477995	0.477995	0.477995	0.0633959	0.0633959	0.270785	0.147083	0.0285031	0.0285031	0.147083	0.0285031	0.147083	0.0033823	0.0033823	0.0285031
			LL vs. HL	0.756288	0.329417	0.756318	1	0.756318	0.756318	0.0211537	0.00297605	0.100908	0.184117	0.756318	0.756318	0.0211537	0.184117	0.513862	1	0.756318	0.329417	0.100951	0.000277796	0.00297605	0.100951	0.0211537	0.00297605	0.329417
[truncated: 4 more columns]
