# Supplementary material for: Acquisition of auditory discrimination mediated by different processes through two distinct circuits linked to the lateral striatum
Source: eLife. 2025 Jul 11;13:RP97326. doi: 10.7554/eLife.97326 (PMC12252547; doi:10.7554/eLife.97326)
Supplement: Figure 5—source data 1. [file elife-97326-fig5-data1.xlsx]

## Sheet: Fig. 5D
Fig. 5D	Data	Mean firing rate and auROC values of aDLS RS-HR neurons during the period when the RS was presented.
	Group	Number of RS-HR neurons in the aDLS; 43, 37, and 44 neurons for early, middle, and late stages, respectively.
	Softwear	matlab ver 2019
	Stats
	Firing rate at early stage
				Time bin
				1	2	3	4	5	6	7	8	9	10	11	12	13	14	15	16	17	18	19	20	21	22	23	24	25	26	27	28	29	30	31	32	33	34	35	36	37	38	39	40	41	42	43	44	45	46
	Trial type	Mean	HR	2.53474	2.93906	2.95174	2.70568	3.03927	2.84946	2.86216	3.27574	3.06798	3.22026	3.70031	3.63559	3.39149	3.55843	3.93785	3.81394	3.34047	3.47021	3.21848	3.57767	3.72819	3.71194	3.99125	4.55895	5.07584	5.20695	5.25844	6.38998	7.64811	8.97564	9.47665	9.59593	8.79176	8.05095	7.93556	7.16011	5.87572	5.77696	5.46155	4.44827	3.91778	3.15102	2.77876	2.46105	1.98304	1.46911
			LR	2.03517	2.2704	2.54982	2.59632	2.36723	2.48605	2.45802	2.53604	2.81399	2.5068	2.5181	2.54515	2.71141	2.86517	2.91648	2.85627	2.90118	2.92968	3.06759	3.24463	3.41187	3.58165	4.30058	5.01037	5.52089	5.16976	4.86075	5.5087	5.81688	6.03081	6.58852	6.50912	5.77737	5.06211	5.03801	4.40539	4.57317	3.73807	3.87183	3.13696	2.80998	2.51355	2.24919	2.16037	1.95623	1.8563
			HL	2.36217	2.31274	2.44846	2.13809	2.33077	2.38735	2.39895	2.05627	2.09899	2.10859	2.06369	2.31497	2.47612	2.1968	2.3724	2.13466	2.4989	2.29357	2.7377	2.7778	2.98238	3.0958	3.61937	5.41661	5.431	4.65602	3.86216	3.24833	2.90966	2.35133	2.1813	2.34781	2.45069	2.0412	1.95557	1.8256	1.89897	1.8723	1.55269	1.72004	1.72733	1.52135	1.76954	1.74355	1.87914	1.96341
			LL	2.61239	2.23712	2.22637	2.61151	2.04897	2.38325	2.52819	2.56466	2.41998	2.61125	2.57692	2.49565	2.55951	2.72023	2.97012	2.75231	2.86978	2.73391	3.05943	3.04855	3.44619	3.6139	4.37804	5.55871	6.21597	5.7233	4.44505	3.66375	3.06126	3.02949	3.14904	2.81939	2.79434	3.11415	2.50241	2.51727	2.55927	2.42624	2.63113	2.52599	2.56232	2.64732	2.74287	2.95925	2.47703	2.70076
		s.e.m.	HR	0.480949	0.591756	0.541369	0.525767	0.722401	0.617951	0.623954	0.641615	0.595877	0.714663	0.794106	0.864225	0.770807	0.929586	1.0442	1.03998	0.973519	0.874253	0.811883	0.881979	0.863206	0.81266	0.947095	1.16025	1.57692	1.5253	1.3371	1.4544	1.67557	1.77322	1.63819	1.65251	1.47264	1.20868	1.07649	0.935994	0.908342	0.935738	1.02577	0.8131	0.793534	0.657914	0.648923	0.551908	0.479322	0.296051
			LR	0.356046	0.413051	0.504277	0.461686	0.431061	0.491718	0.52097	0.471937	0.496184	0.450666	0.472667	0.507197	0.528344	0.574571	0.707063	0.585598	0.596917	0.628272	0.642823	0.612945	0.741622	0.80849	1.05868	1.34602	1.65017	1.66849	1.33617	1.33604	1.31392	1.31037	1.35557	1.33507	1.03897	0.853471	0.86601	0.686851	0.74153	0.579774	0.600145	0.453698	0.433197	0.322499	0.322492	0.326337	0.288519	0.267395
			HL	0.364981	0.372237	0.40836	0.437705	0.411447	0.411917	0.449268	0.445677	0.456757	0.455364	0.417704	0.43787	0.486993	0.585147	0.598078	0.609522	0.702252	0.709221	0.846373	0.934161	0.991953	1.11273	1.3573	2.04125	2.02038	1.62664	1.47575	1.26359	1.17385	0.954128	0.827036	0.83926	0.874058	0.765866	0.541387	0.46616	0.483388	0.576996	0.459388	0.563007	0.500413	0.537431	0.669397	0.578136	0.616013	0.559368
			LL	0.489419	0.447704	0.432891	0.47462	0.420531	0.470911	0.543479	0.611053	0.532474	0.643709	0.663675	0.696575	0.781575	0.901541	0.933716	1.02979	1.08033	1.08098	1.16991	1.2083	1.38007	1.51243	1.83851	2.31939	2.37815	2.16504	1.47409	1.30374	1.0239	1.02177	0.932626	0.855507	0.836409	0.824591	0.64266	0.68456	0.702703	0.733858	0.779065	0.778413	0.842442	0.91426	0.857514	1.01923	0.972622	0.992181
		p value (vs. HR)	HR vs. LR	0.124762	0.0481308	0.159499	0.66878	0.206582	0.329404	0.120546	0.118406	0.242311	0.160763	0.000730475	0.015174	0.107791	0.0870191	0.0315641	0.0491023	0.639998	0.362027	0.345708	0.588844	0.260989	0.65825	0.431593	0.683723	0.494047	0.594065	0.497194	0.322281	0.0132476	0.000230582	0.000162594	0.000898106	0.000368063	0.00137039	0.00354901	0.000752309	0.17291	0.143109	0.347474	0.333152	0.558743	0.935719	0.951879	0.746977	0.40841	0.158372
			HR vs. HL	0.861517	0.360936	0.273545	0.206417	0.448403	0.392407	0.595911	0.0545843	0.0271404	0.126019	0.0284568	0.288875	0.500085	0.0375879	0.0246648	0.0108849	0.407002	0.179748	0.25798	0.226374	0.16285	0.282554	0.207239	0.510384	0.330148	0.480317	0.145429	0.0246626	0.0043776	0.000434433	0.000254829	9.61094e-05	0.00010887	1.46045e-05	4.92819e-06	1.49796e-05	0.000462182	8.41012e-05	0.000207425	0.00208355	0.00561225	0.021438	0.0511007	0.0836343	0.175842	0.845876
			HR vs. LL	0.922182	0.302921	0.0823096	0.790509	0.250439	0.456203	0.404348	0.178906	0.174595	0.0817384	0.0913048	0.121376	0.086077	0.0256642	0.0256876	0.0102489	0.234752	0.0380428	0.274876	0.0896529	0.0507365	0.104832	0.158945	0.201392	0.667221	0.52493	0.186939	0.0411019	0.0151106	0.00227554	0.00077176	0.00020972	5.50527e-05	0.000129315	2.07354e-05	0.000253454	0.00274816	0.00140202	0.00586086	0.0412545	0.025395	0.216231	0.686772	0.829716	0.349571	0.53766
			LR vs. HL	0.861517	0.360936	0.273545	0.206417	0.448403	0.392407	0.595911	0.0545843	0.0271404	0.126019	0.0284568	0.288875	0.500085	0.0375879	0.0246648	0.0108849	0.407002	0.179748	0.25798	0.226374	0.16285	0.282554	0.207239	0.510384	0.330148	0.480317	0.145429	0.0246626	0.0043776	0.000434433	0.000254829	9.61094e-05	0.00010887	1.46045e-05	4.92819e-06	1.49796e-05	0.000462182	8.41012e-05	0.000207425	0.00208355	0.00561225	0.021438	0.0511007	0.0836343	0.175842	0.845876
			LR vs. LL	0.922182	0.302921	0.0823096	0.790509	0.250439	0.456203	0.404348	0.178906	0.174595	0.0817384	0.0913048	0.121376	0.086077	0.0256642	0.0256876	0.0102489	0.234752	0.0380428	0.274876	0.0896529	0.0507365	0.104832	0.158945	0.201392	0.667221	0.52493	0.186939	0.0411019	0.0151106	0.00227554	0.00077176	0.00020972	5.50527e-05	0.000129315	2.07354e-05	0.000253454	0.00274816	0.00140202	0.00586086	0.0412545	0.025395	0.216231	0.686772	0.829716	0.349571	0.53766
	Firing rate at middle stage
				Time bin
				1	2	3	4	5	6	7	8	9	10	11	12	13	14	15	16	17	18	19	20	21	22	23	24	25	26	27	28	29	30	31	32	33	34	35	36	37	38	39	40	41	42	43	44	45	46
	Trial type	Mean	HR	2.80835	2.60145	2.82317	2.84266	2.61205	2.9131	2.67394	2.76397	3.26526	3.47135	3.47726	3.56329	3.50653	3.15303	3.28667	3.39253	3.37475	3.53846	3.49826	3.87371	4.02267	4.36971	4.28489	4.17507	5.03487	5.33612	6.97393	9.02356	10.4173	11.3393	11.096	12.0371	11.664	11.5995	11.1017	9.36944	8.08425	6.70225	6.65681	6.08441	5.24605	4.77906	4.65924	3.6977	3.2991	2.49455
			LR	2.40018	2.0548	2.63879	2.36866	2.5058	2.56137	2.72212	2.76609	2.83755	3.38477	3.15229	3.06393	3.01239	3.2931	2.92895	2.97426	3.41095	3.54941	3.68374	3.78386	4.07165	3.51146	3.39504	3.67515	4.06638	4.06941	4.05448	4.90702	6.01313	6.15053	6.17458	6.51167	6.76966	6.86382	7.24982	7.12984	6.34758	6.61794	6.61772	6.03179	5.3599	4.83848	4.88218	4.28747	3.62826	3.61507
			HL	2.82327	2.90686	3.36761	3.31571	2.84391	3.28877	3.27086	3.56034	3.30876	3.31901	3.55671	3.66256	3.45887	3.56788	3.15303	2.96904	2.99474	2.94884	2.94536	3.599	3.02815	3.32114	3.65584	3.90784	3.33165	2.99715	2.89846	2.65575	2.72836	2.78319	2.94783	3.18888	3.31785	3.28525	2.68763	2.61655	2.24999	2.32925	2.21811	2.29779	2.17959	2.33538	1.8585	2.24885	1.86816	1.9265
			LL	3.14648	3.29116	3.75784	3.67534	3.81557	4.02305	4.07943	3.58472	3.26414	3.80478	3.49826	3.37076	3.67569	3.11182	3.46178	3.07483	3.26497	3.37429	3.51334	3.55027	3.4598	3.7869	3.76624	4.25727	4.24901	3.33989	3.31041	2.96655	2.96576	2.50183	3.14379	3.08129	3.69662	3.57536	3.42562	3.59586	3.66565	3.64822	3.54516	3.5794	4.1292	4.11775	3.95019	4.05513	3.58423	3.57478
		s.e.m.	HR	0.310585	0.335054	0.396499	0.335365	0.354865	0.412217	0.413383	0.384884	0.493404	0.531225	0.578303	0.707736	0.681623	0.581196	0.743332	0.67042	0.650358	0.74781	0.69345	0.82053	0.866398	1.01174	1.00601	0.822663	0.854165	0.858066	1.16866	1.61128	1.92246	2.0866	2.04351	2.01773	1.94634	1.81703	1.54192	1.33732	1.16575	1.25196	1.33144	1.31825	1.29093	1.28894	1.30132	1.13902	1.07187	0.775414
			LR	0.435548	0.427805	0.439311	0.408859	0.466977	0.428203	0.484363	0.506035	0.620291	0.681344	0.597819	0.617645	0.567147	0.568504	0.526422	0.507221	0.570752	0.644671	0.679091	0.807963	0.855692	0.768512	0.777042	0.754945	0.837848	0.765398	0.634236	0.780129	1.06931	1.03951	1.13517	1.26383	1.21051	1.30696	1.37755	1.45412	1.39052	1.29938	1.41975	1.20711	1.07393	0.92069	0.816387	0.88323	0.605172	0.596699
			HL	0.472694	0.49881	0.67865	0.681713	0.538103	0.627488	0.754693	0.976168	0.875474	0.836721	0.923159	1.01071	1.0559	0.906801	0.774872	0.816622	0.81393	0.749334	0.740913	0.892178	0.818941	0.942037	1.05505	1.22812	1.35731	1.40351	1.4515	1.34916	1.20283	1.37307	1.37039	1.25068	1.40854	1.14055	0.884043	0.921783	0.568908	0.58622	0.46776	0.528914	0.492977	0.706997	0.453873	0.661457	0.709838	0.488694
			LL	0.620695	0.694158	0.835572	0.752676	0.76345	0.857754	0.878281	0.794097	0.828023	0.852856	0.83137	0.719197	0.805433	0.799548	0.882617	0.77856	0.894931	0.830916	0.88679	0.93975	0.997294	1.10529	1.18551	1.65512	1.84994	1.45849	1.33443	1.16967	1.28904	0.884635	0.904016	0.822668	1.01275	0.99256	0.950927	1.14061	1.12703	1.26886	1.31265	1.33744	1.65809	1.64664	1.43396	1.55127	1.37034	1.20666
		p value	HR vs. LR	0.0868084	0.0347363	0.540054	0.0868133	0.225483	0.254966	0.831377	0.850826	0.125976	0.643023	0.210196	0.131499	0.303742	0.949892	0.24632	0.598123	0.549458	0.626845	0.837446	0.614004	0.879284	0.0330332	0.543367	0.130269	0.107811	0.0132917	0.000331726	0.000442094	0.0027731	9.30331e-05	0.000362056	1.6495e-05	0.000110754	5.44539e-05	0.000706946	0.0278438	0.0303944	0.80342	0.634632	0.56136	0.118417	0.133333	0.0637609	0.0714098	0.0326247	0.00347605
			HR vs. HL	0.294516	0.838168	0.986932	0.533667	0.700481	0.623919	0.755642	0.278344	0.202773	0.157376	0.23868	0.637414	0.251427	0.869895	0.837197	0.220972	0.277608	0.136092	0.309038	0.623162	0.158396	0.0930333	0.295899	0.130269	0.00151633	0.00150022	0.000608238	0.000194973	0.000184176	0.000118522	6.88771e-05	0.000139368	0.000152939	0.000135147	6.19103e-05	5.80759e-05	4.48732e-05	0.00014812	0.000669051	0.000471869	0.0200251	0.0512813	0.01694	0.431743	0.0762803	0.819796
			HR vs. LL	0.660012	0.682925	0.615148	0.887558	0.571679	0.682188	0.75336	0.850464	0.125983	0.521414	0.0593935	0.561044	0.650507	0.323078	0.478011	0.185178	0.148547	0.271445	0.394372	0.135709	0.251572	0.112105	0.166802	0.0879378	0.00244439	0.00223308	0.00355678	0.00107594	0.000500243	0.000132873	0.000173461	7.72862e-05	0.000284364	0.000239241	5.10717e-05	0.000452234	0.000928016	0.00303219	0.00244439	0.0218052	0.244862	0.450778	0.658318	0.671421	0.251572	0.419593
			LR vs. HL	0.294516	0.838168	0.986932	0.533667	0.700481	0.623919	0.755642	0.278344	0.202773	0.157376	0.23868	0.637414	0.251427	0.869895	0.837197	0.220972	0.277608	0.136092	0.309038	0.623162	0.158396	0.0930333	0.295899	0.130269	0.00151633	0.00150022	0.000608238	0.000194973	0.000184176	0.000118522	6.88771e-05	0.000139368	0.000152939	0.000135147	6.19103e-05	5.80759e-05	4.48732e-05	0.00014812	0.000669051	0.000471869	0.0200251	0.0512813	0.01694	0.431743	0.0762803	0.819796
			LR vs. LL	0.660012	0.682925	0.615148	0.887558	0.571679	0.682188	0.75336	0.850464	0.125983	0.521414	0.0593935	0.561044	0.650507	0.323078	0.478011	0.185178	0.148547	0.271445	0.394372	0.135709	0.251572	0.112105	0.166802	0.0879378	0.00244439	0.00223308	0.00355678	0.00107594	0.000500243	0.000132873	0.000173461	7.72862e-05	0.000284364	0.000239241	5.10717e-05	0.000452234	0.000928016	0.00303219	0.00244439	0.0218052	0.244862	0.450778	0.658318	0.671421	0.251572	0.419593
	Firing rate at late stage
				Time bin
				1	2	3	4	5	6	7	8	9	10	11	12	13	14	15	16	17	18	19	20	21	22	23	24	25	26	27	28	29	30	31	32	33	34	35	36	37	38	39	40	41	42	43	44	45	46
	Trial type	Mean	HR	3.02778	2.84686	2.85191	2.94428	2.79389	3.25248	3.11144	3.19924	3.29405	3.18812	3.42053	3.33322	3.51723	3.72177	3.62843	4.00017	4.03437	4.33396	4.40096	5.01733	5.37632	5.39839	5.28258	5.73469	6.19843	7.2951	7.85104	8.14057	8.13689	8.20256	9.19079	10.0129	10.4436	11.2528	10.8098	10.6304	9.35347	8.95147	7.78716	7.14614	6.41746	5.52487	4.80052	4.03985	3.38548	2.81628
			LR	2.55194	2.40983	1.89221	2.89019	2.51034	2.30807	2.81836	2.28997	2.25847	2.71336	2.62959	2.2954	2.65969	2.43876	2.83132	3.14669	3.71197	3.44287	3.89754	4.47812	5.22439	4.51263	5.18051	4.81376	5.68372	5.55423	6.71976	6.37389	6.01453	4.76722	4.79235	5.59976	5.8665	6.84642	6.94634	6.75722	6.24465	6.85285	5.6286	5.42873	5.1541	5.37205	4.94211	5.34361	4.90499	4.49195
			HL	2.23373	1.6164	1.61258	1.55092	1.41982	1.13768	0.789436	1.12617	1.09893	1.32659	1.39874	1.52155	2.00715	1.96061	2.54049	2.79656	2.42992	2.85768	3.15506	3.23526	3.31514	3.04265	3.09616	3.08862	3.70998	3.59201	3.84692	3.10221	3.64499	2.94642	2.88007	2.32205	2.81153	2.23151	2.58122	2.15914	2.32867	2.06156	1.63335	1.5459	1.55486	1.73911	1.99524	1.69429	2.21013	1.7398
			LL	2.45495	2.18783	2.02332	1.89627	1.85112	1.91767	1.92866	1.79321	1.72296	1.90268	1.83897	1.78239	1.8701	1.97109	2.16449	2.22055	2.34326	2.44804	2.509	2.60041	2.74154	2.4396	2.77325	2.99228	3.41556	3.87174	3.56619	3.3691	3.46462	3.41547	3.29942	3.26037	3.14865	3.03802	2.87129	2.8718	2.7912	2.53782	2.44361	2.02226	1.83663	1.42437	1.3797	1.19095	1.13537	1.20831
		s.e.m.	HR	0.600307	0.562661	0.56961	0.592018	0.551273	0.579025	0.663881	0.622604	0.710221	0.658183	0.771452	0.722235	0.788182	0.926178	0.94104	0.992432	1.08501	1.15671	1.19376	1.27546	1.397	1.37702	1.39859	1.55568	1.98798	2.44188	2.42423	2.41204	2.23359	2.21229	2.40661	2.47894	2.48596	2.65741	2.58478	2.60628	2.46006	2.26615	2.02291	1.85228	1.65961	1.4907	1.24719	1.08302	0.880832	0.71616
			LR	0.478299	0.43112	0.448893	0.54004	0.544183	0.561982	0.606929	0.45915	0.451692	0.59927	0.560075	0.502653	0.461668	0.518702	0.622005	0.901927	1.02617	0.871574	1.05197	1.23815	1.35113	1.11479	1.41373	1.21321	1.80714	1.77424	2.04348	2.02481	1.85801	1.72297	1.0832	1.53615	1.63954	1.89906	1.9125	1.88782	1.46002	1.55826	1.26476	1.30196	1.27132	1.43784	1.45183	1.52411	1.25735	1.00046
			HL	0.520113	0.442449	0.319738	0.333261	0.366318	0.248713	0.191956	0.214186	0.218991	0.289123	0.328265	0.382359	0.485259	0.547687	0.637049	0.973523	0.898763	1.21059	1.18285	1.22346	1.31764	0.898719	1.2438	1.3193	1.36122	1.52048	1.28492	0.87889	1.01682	0.77316	0.753693	0.699526	0.792417	0.552946	0.634734	0.482051	0.555564	0.417578	0.305155	0.365499	0.352381	0.457218	0.506711	0.379726	0.460988	0.634864
			LL	0.33999	0.310341	0.23303	0.241197	0.255938	0.286151	0.311817	0.295002	0.32975	0.360861	0.39345	0.414541	0.445785	0.555029	0.578948	0.712799	0.730144	0.94147	0.856549	0.999069	0.992606	0.899139	1.03627	1.29669	1.55305	1.6509	1.34292	1.19175	1.31402	1.28166	1.1772	1.11133	0.991271	0.82489	0.748729	0.815069	0.842513	0.909827	0.876492	0.626325	0.495974	0.379222	0.344668	0.301898	0.27497	0.248277
		p value	HR vs. LR	0.546786	0.282239	0.0348514	0.769477	0.267873	0.00689557	0.654816	0.0388885	0.0425555	0.464074	0.0749105	0.0265658	0.115792	0.0410402	0.064445	0.0423936	0.301398	0.637396	0.273551	0.30658	0.780171	0.249126	0.713175	0.279687	0.474777	0.0868036	0.158366	0.0955028	0.00707385	0.00103913	0.00902418	0.000598583	0.00568898	0.0104705	0.0706516	0.0152206	0.115382	0.555447	0.209134	0.454066	0.274062	0.40243	0.541203	0.419593	0.196749	0.124767
			HR vs. HL	0.419944	0.0200521	0.0388861	0.0718195	0.00836023	0.00269123	7.32022e-05	0.0135077	0.0291146	0.00377647	0.00662167	0.0110688	0.0223041	0.0903334	0.645497	0.141776	0.295267	0.408425	0.274042	0.386906	0.148633	0.143809	0.337866	0.144898	0.333851	0.210498	0.153139	0.0324265	0.0717746	0.0233453	0.00217924	0.000180451	0.000661235	1.07574e-05	0.000126836	5.3927e-05	0.00102204	0.000194907	0.000124276	0.000598509	0.000810335	0.0104777	0.0170186	0.0584148	0.264245	0.0690759
			HR vs. LL	0.684471	0.461383	0.743845	0.417994	0.237366	0.0511615	0.178183	0.0836343	0.0518523	0.148686	0.14519	0.116599	0.0778993	0.282233	0.36194	0.157673	0.192799	0.0352256	0.166057	0.0315072	0.0908208	0.0215355	0.313397	0.191899	0.141026	0.126009	0.009236	0.00524279	0.0043762	0.00166256	0.000788396	0.000443531	0.000551566	0.000754656	0.000385178	0.000422068	0.00162399	0.000431903	0.000609097	0.000171302	0.000349713	6.19103e-05	9.32949e-05	0.000632938	0.000196617	0.0115407
			LR vs. HL	0.419944	0.0200521	0.0388861	0.0718195	0.00836023	0.00269123	7.32022e-05	0.0135077	0.0291146	0.00377647	0.00662167	0.0110688	0.0223041	0.0903334	0.645497	0.141776	0.295267	0.408425	0.274042	0.386906	0.148633	0.143809	0.337866	0.144898	0.333851	0.210498	0.153139	0.0324265	0.0717746	0.0233453	0.00217924	0.000180451	0.000661235	1.07574e-05	0.000126836	5.3927e-05	0.00102204	0.000194907	0.000124276	0.000598509	0.000810335	0.0104777	0.0170186	0.0584148	0.264245	0.0690759
			LR vs. LL	0.684471	0.461383	0.743845	0.417994	0.237366	0.0511615	0.178183	0.0836343	0.0518523	0.148686	0.14519	0.116599	0.0778993	0.282233	0.36194	0.157673	0.192799	0.0352256	0.166057	0.0315072	0.0908208	0.0215355	0.313397	0.191899	0.141026	0.126009	0.009236	0.00524279	0.0043762	0.00166256	0.000788396	0.000443531	0.000551566	0.000754656	0.000385178	0.000422068	0.00162399	0.000431903	0.000609097	0.000171302	0.000349713	6.19103e-05	9.32949e-05	0.000632938	0.000196617	0.0115407
	ROC value at early stage
				Time bin
				1	2	3	4	5	6	7	8	9	10	11	12	13	14	15	16	17	18	19	20	21	22	23	24	25
	Trial type	Mean	LR vs HR	0.505917	0.509432	0.508198	0.50764	0.513277	0.50997	0.513812	0.515908	0.519441	0.526367	0.524419	0.518181	0.505727	0.534451	0.558866	0.573238	0.564651	0.558319	0.53995	0.528401	0.508019	0.495561	0.497465	0.48961	0.494304
			LR vs HL	0.499333	0.509963	0.502149	0.509939	0.51958	0.511832	0.517114	0.519239	0.522051	0.527362	0.523827	0.516706	0.510487	0.54505	0.570404	0.590532	0.58043	0.576011	0.555145	0.555259	0.534768	0.521428	0.507635	0.513452	0.511477
			LR vs LL	0.490745	0.494202	0.48789	0.489346	0.488692	0.479083	0.49144	0.484806	0.495543	0.502937	0.499324	0.507398	0.501667	0.488865	0.448797	0.437076	0.435887	0.446206	0.456522	0.46932	0.481378	0.487609	0.507095	0.518551	0.520953
		s.e.m.	LR vs HR	0.0110582	0.0114376	0.0110702	0.0111554	0.0124901	0.0137538	0.0169487	0.0182678	0.0177085	0.0201821	0.022982	0.0238522	0.0267419	0.0300279	0.0315759	0.0286765	0.0228943	0.0202002	0.0195069	0.0192208	0.018468	0.017421	0.0172061	0.0161644	0.0156191
			LR vs HL	0.00887603	0.00988982	0.00996904	0.0108826	0.0105738	0.0107021	0.0146184	0.0150573	0.015202	0.0186424	0.0215783	0.0233313	0.0255608	0.0283271	0.0295083	0.0268801	0.0231204	0.0186237	0.0166265	0.0158238	0.014678	0.0128147	0.0139218	0.0145151	0.0115821
			LR vs LL	0.00485235	0.00602577	0.00522356	0.00584083	0.00568243	0.00538665	0.00658639	0.0057716	0.0057512	0.00512553	0.0048388	0.00686419	0.00928901	0.0081715	0.0133191	0.0169468	0.0163136	0.0163779	0.0173223	0.0204856	0.0162622	0.0154271	0.00940887	0.00749651	0.00704573
		p value	LR vs HR	0.550386	0.427493	0.323183	0.111471	0.111469	0.0441128	0.107516	0.0717193	0.0144111	0.0258659	0.00843264	0.0684201	0.540361	0.00429781	0.00480132	1.71706e-06	4.03647e-06	4.03647e-06	0.00529021	0.01686	0.111471	0.554574	0.00294813	0.554577	0.0717209
			LR vs HL	0.844648	0.550386	0.846258	0.427496	0.00265957	0.16162	0.227843	0.318076	0.103176	0.0441151	0.0717209	0.312375	0.215669	0.00206675	0.000659702	1.1595e-05	1.59454e-07	1.59454e-07	0.000140644	1.71706e-06	1.71728e-06	6.71957e-05	0.00999353	0.000165161	6.71896e-05
			LR vs LL	0.318079	0.16162	0.0465171	0.0168606	0.844649	0.00529046	0.0156668	0.000140644	0.10318	0.686327	0.422329	0.686327	0.534387	0.416539	4.03647e-06	0.00294859	0.00529046	0.000751494	0.32318	0.554574	1	1	0.233047	0.00265957	0.0156691
	ROC value at middle stage
				Time bin
				1	2	3	4	5	6	7	8	9	10	11	12	13	14	15	16	17	18	19	20	21	22	23	24	25
	Trial type	Mean	LR vs HR	0.484938	0.486227	0.483171	0.486112	0.498705	0.496042	0.498263	0.499193	0.506016	0.509522	0.515056	0.51104	0.545198	0.562079	0.592779	0.573301	0.565566	0.569815	0.568711	0.570749	0.549213	0.536632	0.515684	0.515714	0.512725
			LR vs HL	0.484028	0.484786	0.491681	0.495579	0.50289	0.491519	0.501587	0.506039	0.510711	0.505755	0.517817	0.50735	0.550093	0.573912	0.596089	0.582555	0.581349	0.586995	0.587738	0.584103	0.569935	0.561673	0.547771	0.528153	0.520862
			LR vs LL	0.491228	0.491297	0.496499	0.50206	0.492087	0.489143	0.499593	0.499584	0.49713	0.495487	0.484029	0.481206	0.477042	0.436533	0.413064	0.40214	0.40289	0.42668	0.470911	0.502379	0.513873	0.52558	0.527878	0.53763	0.531778
		s.e.m.	LR vs HR	0.0151075	0.0169139	0.0153967	0.015818	0.0190415	0.0181701	0.0192822	0.0206796	0.0200067	0.0205301	0.0212828	0.0221408	0.0252826	0.0256029	0.0260602	0.0231088	0.0259603	0.0267817	0.0280882	0.0275862	0.0273297	0.0255264	0.0226154	0.0218331	0.0167349
			LR vs HL	0.0126725	0.0141767	0.0144908	0.0193063	0.0183483	0.0185994	0.0198912	0.02096	0.0218742	0.0198631	0.0213037	0.020904	0.0234888	0.0255366	0.0262669	0.0263234	0.0284901	0.0273923	0.0240766	0.0220108	0.020883	0.0179179	0.0157375	0.0131732	0.0118028
			LR vs LL	0.0062752	0.00598292	0.00577687	0.00652209	0.00810618	0.00557981	0.00699104	0.00917008	0.00922982	0.00756538	0.0073882	0.00988453	0.00981058	0.0147299	0.0196969	0.0196082	0.0170577	0.0178538	0.0213774	0.024372	0.0232996	0.0222569	0.0171963	0.0150818	0.012445
		p value	LR vs HR	0.0189747	0.392816	0.28768	0.671307	0.519877	0.392816	0.671307	0.671307	0.0319508	0.131201	0.0521	0.0863712	0.00498188	0.000110772	5.62944e-06	2.28948e-06	0.000284706	4.98277e-05	4.0096e-05	2.31867e-08	0.000110772	0.0521	0.28768	0.0319508	0.017538
			LR vs HL	0.0863712	0.835212	0.136007	0.136007	0.281722	0.671307	0.281722	0.667201	0.0863712	1	0.00232415	0.0863712	0.00199247	4.00836e-05	0.000238632	1.74013e-05	5.62944e-06	2.52011e-07	2.28948e-06	0.0100184	0.000591397	0.000110742	0.00265265	0.00498188	0.0319508
			LR vs LL	0.0863712	0.0319493	0.281722	0.671307	0.0863712	0.00265265	1	0.386559	0.83319	0.519877	0.0488571	0.83319	0.0777474	0.0297395	4.14061e-06	9.03196e-07	9.33384e-08	0.000284706	0.28768	0.0550569	0.00554347	0.00554347	0.000591397	0.0100184	0.000238781
	ROC value at late stage
				Time bin
				1	2	3	4	5	6	7	8	9	10	11	12	13	14	15	16	17	18	19	20	21	22	23	24	25
	Trial type	Mean	LR vs HR	0.499292	0.500328	0.505626	0.506466	0.513697	0.519557	0.514098	0.512527	0.520017	0.531917	0.545744	0.542648	0.537618	0.542319	0.537635	0.547183	0.547858	0.551618	0.561783	0.566053	0.565237	0.561352	0.56199	0.550071	0.532491
			LR vs HL	0.513887	0.512548	0.514312	0.529	0.527082	0.535802	0.521521	0.5148	0.510277	0.511313	0.522868	0.532058	0.512501	0.522801	0.515695	0.547097	0.54273	0.525357	0.563457	0.569607	0.55623	0.547434	0.555008	0.540259	0.533753
			LR vs LL	0.491924	0.484827	0.479374	0.481833	0.48211	0.483212	0.479797	0.48427	0.486845	0.488997	0.49225	0.493122	0.479971	0.471512	0.441568	0.429464	0.43866	0.443875	0.462388	0.468747	0.488537	0.509048	0.527273	0.537704	0.535395
		s.e.m.	LR vs HR	0.0120662	0.0102031	0.0103486	0.0108864	0.0116248	0.0118371	0.0123167	0.0147924	0.016632	0.0170844	0.0174089	0.0218986	0.0245209	0.0268195	0.0273398	0.0276363	0.0250138	0.0212008	0.021693	0.0186219	0.0178911	0.0193672	0.01722	0.0161939	0.0175154
			LR vs HL	0.0139276	0.0131589	0.0164069	0.0131959	0.0130644	0.0146272	0.0140064	0.0186241	0.0205588	0.0236575	0.0209356	0.025248	0.0309041	0.0312658	0.0324375	0.0273995	0.0269994	0.0258407	0.0230052	0.0195676	0.0195834	0.0168131	0.0167225	0.0149918	0.0146883
			LR vs LL	0.0100775	0.00897411	0.00871563	0.0103319	0.00899404	0.0130203	0.0100344	0.0119182	0.0140524	0.0110133	0.00944971	0.0110612	0.0104656	0.0143842	0.0184134	0.0242926	0.022149	0.0243968	0.0267293	0.0247355	0.0223942	0.0217423	0.0184509	0.0159766	0.0147644
		p value	LR vs HR	1	0.240727	0.159044	1	0.69499	0.847138	0.847138	0.0734268	0.424989	0.84363	0.164123	0.552714	0.315083	0.105077	0.109563	0.320945	0.168732	0.0285992	0.230538	3.52247e-06	0.00135127	0.00117012	0.0699917	0.0699843	0.0426563
			LR vs HL	0.100005	0.144815	0.0516049	0.100005	0.0573082	0.0999718	0.343648	0.638367	0.818844	0.818844	0.343667	0.630371	0.144857	0.483327	0.473633	0.000646007	0.0110968	0.0198266	0.00220898	0.00109816	0.00220898	0.0198163	0.000862334	0.017408	0.00813262
			LR vs LL	0.694991	0.00250283	0.00153338	0.164123	0.00965949	0.00153321	0.0028208	7.44833e-05	0.0453569	0.0453558	0.68789	0.0662748	0.024722	0.00250283	6.33561e-07	1.31216e-05	3.50604e-05	0.0303647	0.0303638	0.557016	0.547887	0.84363	0.109565	0.0699902	0.16412
[truncated: 4 more columns]

## Sheet: Fig. 5E
Fig. 5E	Data	Averaged firing rate during the RS period in the HR and LR trial at the early, middle, and late stages
	Group	Number of RS-HR neurons in the aDLS; 43, 37, and 44 neurons for early, middle, and late stages, respectively.
	Softwear	matlab ver 2019
	Dependent variable	Firing rate (Hz)
	Stats	Kruskalwallis test; HR trial type, χ2 = 3.027916450689193, p = 0.220037294763517 LR trial type, χ2 = 1.249006383505295, p = 0.535527416878303
			Firing rate on the HR trial					Firing rate on the LR trial
	Learning stage	early	4.61538			Learning stage	early	3.48008
		early	1.83761				early	2.55765
		early	1.19658				early	1.25786
		early	19.2308				early	14.0881
		early	1.23932				early	1.50943
		early	4.91453				early	2.85115
		early	3.02222				early	1.61616
		early	18.8444				early	13.1313
		early	8.44444				early	5.25253
		early	1.73333				early	0.10101
		early	1.06667				early	0.0505051
		early	4.26667				early	1.31313
		early	26.0889				early	11.5657
		early	7.02222				early	0.454545
		early	2.46032				early	1.26362
		early	1.62698				early	0.305011
		early	3.21429				early	3.48584
		early	3.28042				early	4.7081
		early	2.29277				early	1.46893
		early	0.458554				early	0.640301
		early	21.0229				early	19.435
		early	19.3403				early	19.8467
		early	3.33333				early	1.41762
		early	3.86243				early	3.08642
		early	2.38095				early	4.44444
		early	27.8788				early	17.4074
		early	6.76768				early	4.07407
		early	9.39394				early	1.97531
		early	2.22222				early	0.740741
		early	8.88889				early	4.71111
		early	2.6936				early	0.8
		early	2.22222				early	0.977778
		early	2.0202				early	0.977778
		early	12.9032				early	12.6523
		early	2.72401				early	2.50896
		early	12.4373				early	9.85663
		early	16.0215				early	17.1685
		early	3.22581				early	2.65233
		early	4.12186				early	3.44086
		early	31.4337				early	30.2509
		early	4.01709				early	0.87146
		early	22.1528				early	6.66667
		early	6.66667				early	7.52137
		middle	11.7891				middle	4.19753
		middle	6.32184				middle	3.22222
		middle	13.5249				middle	2.61111
		middle	1.5873				middle	0.634921
		middle	2.4127				middle	0.952381
		middle	2.38095				middle	0.18018
		middle	1.42857				middle	0.960961
		middle	0.634921				middle	0.12012
		middle	7.66885				middle	2.01389
		middle	3.5337				middle	0.30303
		middle	6.63024				middle	2.52525
		middle	9.72625				middle	6.66667
		middle	6.21578				middle	5.80431
		middle	9.30757				middle	7.36318
		middle	7.43961				middle	6.534
		middle	16.3607				middle	10.3814
		middle	33.1973				middle	14.0741
		middle	21.9048				middle	7.61905
		middle	11.5646				middle	4.65608
		middle	0.181406				middle	0
		middle	8.29932				middle	4.44444
		middle	28.5024				middle	19.9471
		middle	39.2271				middle	23.7037
		middle	1.28824				middle	0.846561
		middle	4.95974				middle	1.95767
		middle	3.25282				middle	2.32804
		middle	3.00926				middle	1.55556
		middle	32.8241				middle	12.2778
		middle	9.01468				middle	3.88889
		middle	7.33753				middle	11.3675
		middle	18.1132				middle	12.2222
		middle	3.05085				middle	0.386473
		middle	2.13564				middle	1.83422
		middle	15.4978				middle	11.7108
		middle	19.0476				middle	17.2134
		middle	5.90381				middle	5.73477
		middle	16.3184				middle	12.6165
		late	0.433604				late	2.77778
		late	1.41975				late	0.740741
		late	61.7938				late	36.6667
		late	1.65997				late	2.77778
		late	0.883534				late	0
		late	0				late	0
		late	51.7537				late	42.2222
		late	16.9648				late	6.66667
		late	5.12195				late	0.740741
		late	0.894309				late	0
		late	0.243902				late	0
		late	10.0542				late	18.7654
		late	7.45257				late	8.88889
		late	2.91188				late	0.888889
		late	3.90805				late	0
		late	3.12399				late	2.03704
		late	1.93237				late	0
		late	5.2381				late	3.08642
		late	20.7407				late	1.97531
		late	11.0065				late	7.36842
		late	1.04575				late	2.22222
		late	2.56209				late	3.85965
		late	28.0523				late	11.1111
		late	19.8431				late	12.2807
		late	8.67974				late	1.52047
		late	1.6732				late	1.28655
		late	22.5098				late	5.73099
		late	14.3529				late	1.40351
		late	2.49688				late	3.33333
		late	1.79775				late	18.5185
		late	4.36954				late	3.88889
		late	1.29838				late	3.7037
		late	5.66792				late	5.92593
		late	23.171				late	15.3704
		late	2.69663				late	1.11111
		late	13.9076				late	2.96296
		late	9.18851				late	6.48148
		late	2.64669				late	0
		late	1.14379				late	0.784314
		late	3.92915				late	1.11111
		late	24.5733				late	18.8889
		late	2.54428				late	1.35802
		late	2.87407				late	4.44444
		late	2.30453				late	0.740741

## Sheet: Fig. 5F
Fig. 5F	Data	Cumulative probability of the proportion of aDLS RS-HR neuron number at the early, middle, and late stages
	Group	Number of RS-HR neurons in the aDLS; 43, 37, and 44 neurons for early, middle, and late stages, respectively.
	Softwear	matlab ver 2019
	Dependent variable	Calculated number of event-related neurons
	Stats	Kruskalwallis test; χ2 = 45.3777, p = 0.00000000014007 post hoc Tukey–Kramer test; early vs. middle; p = 0.0000706611859703221 early vs. late; p = 0.00000000103798214468042 middle vs. late; p = 0.040006129413456
			Cumulative probability of the proportion of RS-HR neuron
	Learning stage	early	13.2353
		early	11.0294
		early	9.92647
		early	12.1324
		early	13.2353
		early	11.3971
		early	11.7647
		early	11.0294
		early	11.3971
		early	12.8676
		early	11.7647
		early	11.3971
		early	12.1324
		early	12.5
		early	11.7647
		early	10.6618
		early	10.2941
		early	9.92647
		early	10.2941
		early	13.6029
		middle	8.24176
		middle	7.41758
		middle	9.06593
		middle	6.59341
		middle	8.24176
		middle	8.79121
		middle	7.69231
		middle	7.96703
		middle	7.41758
		middle	8.24176
		middle	7.96703
		middle	7.41758
		middle	7.14286
		middle	7.69231
		middle	7.41758
		middle	7.41758
		middle	7.69231
		middle	7.14286
		middle	7.41758
		middle	8.24176
		late	6.66667
		late	7.22222
		late	6.94444
		late	7.22222
		late	6.11111
		late	6.38889
		late	6.11111
		late	7.5
		late	6.11111
		late	6.66667
		late	7.22222
		late	7.77778
		late	6.11111
		late	6.38889
		late	7.22222
		late	6.11111
		late	7.5
		late	6.11111
		late	7.5
		late	7.77778
