# Supplementary material for: Acquisition of auditory discrimination mediated by different processes through two distinct circuits linked to the lateral striatum
Source: eLife. 2025 Jul 11;13:RP97326. doi: 10.7554/eLife.97326 (PMC12252547; doi:10.7554/eLife.97326)
Supplement: Figure 6—figure supplement 1—source data 1. [file elife-97326-fig6-figsupp1-data1.xlsx]

## Sheet: Figure 6–figure supplement 1A
Figure 6–figure supplement 1A	Data	Mean firing rate and auROC values of aDLS FL-LL neurons
	Softwear	matlab ver 2019
	Group	Number of FL-LL neurons in the aDLS; 30, 36, and 43 neurons for early, middle, and late stages, respectively.
	Stats
	Firing rate at early stage
				Time bin
				1	2	3	4	5	6	7	8	9	10	11	12	13	14	15	16	17	18	19	20	21	22	23	24	25	26	27	28	29	30	31	32	33	34	35	36	37	38	39	40	41	42	43	44	45	46
	Trial type	Mean	HR	2.40716	2.06119	2.22369	2.08935	2.55485	2.12438	2.06643	1.9776	2.01184	2.23829	2.6917	2.41798	2.37124	2.21069	2.33747	2.44528	2.4688	2.59001	2.64248	2.62994	2.51241	2.5569	2.69136	2.76539	2.81384	2.68015	2.97003	3.11759	3.82935	3.81375	4.41821	3.92422	3.57012	2.96148	2.96553	2.73469	2.33656	2.44974	2.44633	2.09551	1.77092	2.12931	1.53515	1.86032	1.72366	2.16478
			LR	1.40308	1.90787	2.00326	1.72468	2.03177	2.17547	1.86428	1.84483	1.81789	1.61492	2.12629	2.11407	2.1944	1.70957	1.98795	2.2347	2.34181	2.00535	2.58031	2.22038	2.43363	2.43711	2.72208	2.83524	3.10976	2.44157	2.65476	2.80946	3.01555	3.89136	4.03468	3.63482	2.74475	2.74807	2.65503	2.29315	2.19281	2.05932	1.86191	1.47466	1.68452	1.2477	1.79883	1.75895	1.34159	1.66492
			HL	1.46836	1.71305	1.4085	1.55007	1.18887	1.33943	1.56885	1.45978	1.27019	1.28121	1.0669	1.1969	1.45312	1.24406	1.17347	1.33985	1.18634	1.29896	1.37822	1.54237	1.50645	1.60878	1.94652	2.62275	3.34794	3.32732	3.45211	3.12182	2.3058	2.02123	1.67617	2.11265	1.97123	1.82803	2.02765	2.36603	2.4105	2.89043	2.39594	2.80412	2.69529	2.78761	3.06144	3.27958	2.99104	3.06203
			LL	1.79134	1.53938	1.59022	1.61452	1.50748	1.6023	1.47267	1.52896	1.50833	1.68343	1.81697	1.4664	1.76471	1.63132	1.42415	1.70315	1.41485	1.42614	1.76597	1.7284	1.77955	2.01166	2.12473	3.16201	4.0707	4.38131	3.61362	3.42364	2.96196	3.07868	3.19502	3.39545	3.53089	4.23162	3.65606	4.54502	4.88357	5.55174	6.32675	6.43229	6.77524	6.70889	6.98117	6.90638	6.96217	7.23298
		s.e.m.	HR	0.443845	0.389018	0.348954	0.307635	0.400997	0.401087	0.408018	0.371125	0.371949	0.368086	0.570033	0.467674	0.519058	0.542996	0.571642	0.593573	0.701029	0.790908	0.834723	0.869669	0.846286	0.883742	1.03326	1.00285	1.10987	1.08757	1.14584	1.27066	1.60771	1.77931	1.68735	1.53801	1.14944	0.795672	0.646556	0.566023	0.503205	0.557914	0.527181	0.53905	0.430301	0.507248	0.349918	0.444058	0.381679	0.493639
			LR	0.210717	0.32382	0.346531	0.286716	0.355899	0.421471	0.388645	0.379858	0.347468	0.32056	0.434528	0.44178	0.503033	0.501696	0.557323	0.620238	0.641315	0.703271	0.812902	0.682416	0.821683	0.911349	1.02854	1.13645	1.31579	1.11759	1.12503	1.276	1.25024	1.55664	1.65092	1.55376	1.06985	0.88396	0.723253	0.537839	0.387832	0.400438	0.349472	0.30381	0.349259	0.27281	0.373377	0.398638	0.307997	0.359904
			HL	0.317871	0.363253	0.359744	0.510044	0.257639	0.360861	0.445388	0.439007	0.31073	0.351267	0.256524	0.321789	0.363285	0.460308	0.384714	0.373854	0.334114	0.435583	0.458977	0.499257	0.561711	0.557747	0.841189	1.07902	1.51233	1.63952	1.8549	1.64317	1.16207	0.739519	0.667067	0.718117	0.688207	0.486439	0.479742	0.581096	0.552238	0.744523	0.576858	0.767199	0.673374	0.751378	0.957924	0.795586	0.864631	0.80128
			LL	0.438558	0.369159	0.319138	0.4084	0.416003	0.453803	0.368511	0.428834	0.388494	0.474089	0.535915	0.474428	0.525863	0.411061	0.408718	0.519924	0.421027	0.430077	0.465336	0.649925	0.587709	0.730203	0.828025	1.39574	1.84145	2.0008	1.57075	1.50092	1.19974	1.11654	0.960755	0.928564	0.75239	0.991417	0.944397	1.13978	1.20331	1.63078	1.76016	1.89	1.95137	1.90317	1.80009	1.67456	1.66764	1.44822
		p value (vs. HR)	LL vs. HR	0.107469	0.110913	0.0210883	0.176551	0.00493993	0.0655698	0.0779878	0.103469	0.16243	0.0672869	0.00941742	0.0303032	0.118234	0.248828	0.0680165	0.0584711	0.0764594	0.0543632	0.618641	0.13103	0.81013	0.389571	0.647535	0.841481	0.96116	0.235957	0.370261	0.249103	0.733187	0.670229	0.954431	0.562928	0.716423	0.265157	0.599802	0.165837	0.0520133	0.0344982	0.0667701	0.0117654	0.00687211	0.0124685	0.00128663	0.00210469	0.00103568	0.000663921
			LL vs. LR	0.480242	0.142763	0.247842	0.33887	0.0479673	0.0318627	0.082653	0.198658	0.144152	0.563342	0.230139	0.081343	0.130727	0.961675	0.208702	0.217986	0.092601	0.756995	0.419526	0.313463	0.686491	0.523009	0.411818	0.522985	0.505673	0.230474	0.171152	0.204564	0.371961	0.909531	0.708866	0.492893	0.290446	0.391342	0.429067	0.0875271	0.0520334	0.0475785	0.0280258	0.00943319	0.0110771	0.0010053	0.00158094	0.000283079	0.000129494	4.86026e-05
			LL vs. HL	0.637687	0.377731	0.56766	0.670247	0.903618	0.767228	0.58719	0.952102	0.401899	0.201222	0.179274	0.670229	0.402896	0.0757301	0.390533	0.19852	0.265852	0.614237	0.0520214	0.846924	0.306433	0.394457	0.135323	0.331681	0.0936034	0.00568447	0.170114	0.116544	0.0369991	0.0298167	0.00182631	0.0101636	0.00184391	0.000555425	0.0137436	0.00138448	0.0129292	0.0142638	0.000445834	0.0246772	0.00355875	0.0029457	0.000164039	0.000407169	0.000123981	8.84258e-06
	Firing rate at middle stage
				Time bin
				1	2	3	4	5	6	7	8	9	10	11	12	13	14	15	16	17	18	19	20	21	22	23	24	25	26	27	28	29	30	31	32	33	34	35	36	37	38	39	40	41	42	43	44	45	46
	Trial type	Mean	HR	1.70805	1.57836	1.53207	1.56151	1.62425	1.73291	1.56257	1.63767	1.9848	2.04704	1.56016	1.83801	1.86771	1.74449	1.91353	1.98523	1.96541	1.83771	1.80549	1.98735	2.02478	2.19253	2.13344	2.33002	2.0077	1.85371	1.87518	1.90309	2.14738	1.9571	1.96972	2.276	1.95801	2.33787	2.60866	2.21266	1.80166	2.08984	1.92442	2.02474	2.10656	1.9071	2.26966	2.27394	2.38201	2.18345
			LR	1.30174	1.46633	1.61219	1.32558	1.71501	1.45743	1.64287	1.62326	1.76284	1.73299	2.02828	1.56168	1.87521	2.05343	1.72513	1.85165	1.94633	1.92282	2.05807	2.11009	2.1212	1.74382	1.99668	2.14657	1.86395	1.71123	1.48544	1.34062	1.38473	1.47823	1.48714	1.67586	1.61106	1.7637	1.72496	1.93189	1.4857	1.51757	1.35482	1.54678	1.40939	1.51664	1.67317	1.31457	1.54419	1.48863
			HL	1.02418	1.01981	1.36969	1.40966	0.983823	1.20854	0.967318	1.03507	1.33853	1.00141	1.39319	1.29902	1.23541	1.16317	0.92556	0.996417	1.19458	1.1816	1.12418	1.60991	1.37493	1.50308	1.65803	1.30573	1.39925	0.878041	0.81966	0.956629	1.15016	0.899911	0.951533	1.33525	1.38538	1.86703	1.89937	1.99444	1.89214	2.1512	2.30104	2.59706	3.07747	2.96313	2.58313	3.01181	2.33918	2.26505
			LL	1.03785	1.02369	0.987891	1.05142	1.15415	1.03245	1.15309	1.17049	1.11758	0.857298	0.911367	0.964122	1.20364	0.895674	0.901153	0.988472	0.962868	0.841446	1.08019	1.00654	0.928362	1.46641	1.58952	1.46214	1.37432	0.99909	1.01279	1.05084	1.22881	1.09285	1.27834	1.65453	2.31222	2.65337	3.22198	3.41218	4.21567	4.77997	4.82765	5.36604	6.59048	7.02245	6.76956	6.99057	6.64051	6.69024
		s.e.m.	HR	0.299188	0.312645	0.362086	0.319439	0.383444	0.366355	0.410159	0.352967	0.539675	0.616458	0.381613	0.50963	0.43714	0.449669	0.528122	0.576525	0.539726	0.497298	0.544792	0.648355	0.694395	0.789511	0.799442	0.828039	0.570967	0.501237	0.450517	0.546109	0.679005	0.684318	0.670073	0.808922	0.74879	0.772058	0.826301	0.749706	0.647202	0.722043	0.735336	0.7475	0.869243	0.957312	1.0432	1.0232	1.05548	0.776825
			LR	0.307849	0.299863	0.320213	0.320574	0.355077	0.298186	0.392634	0.47159	0.41801	0.546203	0.606257	0.422235	0.431485	0.486271	0.503051	0.47313	0.443129	0.503501	0.531895	0.562503	0.575156	0.490598	0.529866	0.613147	0.565685	0.634478	0.348151	0.374845	0.488522	0.437941	0.458579	0.459012	0.532017	0.478042	0.456716	0.410313	0.309242	0.286577	0.278059	0.362412	0.276437	0.298849	0.289509	0.288393	0.318392	0.293254
			HL	0.313661	0.266763	0.367822	0.392254	0.319282	0.250713	0.263528	0.286414	0.375174	0.289977	0.446978	0.409054	0.417502	0.438841	0.297158	0.35551	0.468059	0.678696	0.472359	0.602629	0.674501	0.653448	0.965568	0.596964	0.618734	0.380488	0.365447	0.358745	0.646664	0.505438	0.340545	0.465999	0.474089	0.648872	0.618236	0.574256	0.520383	0.641605	0.570603	0.797672	0.918042	0.899991	0.703157	0.798161	0.813685	0.618789
			LL	0.234096	0.208307	0.206732	0.241396	0.198038	0.22779	0.235831	0.258582	0.269883	0.261524	0.252683	0.281697	0.37886	0.328094	0.35892	0.410964	0.391564	0.32015	0.521829	0.412806	0.486141	0.772315	0.870881	0.772101	0.622238	0.354503	0.495486	0.484376	0.670351	0.35644	0.485854	0.594827	0.798918	0.854993	1.03584	1.18173	1.29777	1.53412	1.55101	1.61941	1.91429	1.86514	1.63907	1.7289	1.48176	1.36868
		p value (vs. HR)	LL vs. HR	0.0354067	0.330847	0.269903	0.158249	0.640147	0.0761409	0.520059	0.304222	0.020413	0.00726951	0.0281657	0.0529217	0.0202167	0.0307755	0.065095	0.0601624	0.0926056	0.0185417	0.0619153	0.0130498	0.00492109	0.128433	0.715593	0.208645	0.164788	0.17421	0.0245824	0.211506	0.0519754	0.2376	0.291876	0.596272	0.308602	0.346905	0.665264	0.268182	0.0314311	0.039039	0.0227995	0.00151633	0.00024357	0.000123956	1.6495e-05	0.000407961	0.00057117	0.00011118
			LL vs. LR	0.939671	0.312671	0.0349993	0.341858	0.231924	0.205864	0.369416	0.885512	0.181202	0.138771	0.0478567	0.157987	0.0142988	0.00976482	0.0361675	0.0271189	0.00267033	0.0349817	0.0322965	0.0147928	0.00855541	0.374495	0.211555	0.0794497	0.135642	0.324199	0.0619363	0.228782	0.218974	0.676568	0.689157	0.856995	0.407165	0.641965	0.348771	0.860001	0.054788	0.0683758	0.0485107	0.00245496	0.0029848	0.00347605	0.00135059	0.000118557	0.000118491	0.000110872
			LL vs. HL	0.411162	0.331916	0.523488	0.412286	0.285446	0.0774891	0.412331	0.37091	0.821682	0.763889	0.198658	0.847558	0.367501	0.548404	0.961154	0.592153	0.903157	0.606887	0.935307	0.179274	0.217226	0.511089	0.306453	0.592153	0.590297	0.82273	0.741194	0.428774	0.531128	0.13626	0.464952	0.306496	0.0391971	0.137335	0.124366	0.274745	0.0103922	0.00642281	0.0544561	0.00342716	0.017907	0.00332622	0.000730475	0.00368854	2.7015e-05	0.000122357
	Firing rate at late stage
				Time bin
				1	2	3	4	5	6	7	8	9	10	11	12	13	14	15	16	17	18	19	20	21	22	23	24	25	26	27	28	29	30	31	32	33	34	35	36	37	38	39	40	41	42	43	44	45	46
	Trial type	Mean	HR	1.9602	1.95818	1.74166	1.94007	1.89742	1.95954	1.79173	1.94011	1.88026	1.9328	1.9118	2.00997	1.93494	1.97026	1.91376	1.99859	1.91708	2.30902	2.22201	2.4581	2.64204	2.36512	2.27342	2.14853	1.62607	1.41206	0.975723	1.09455	1.63337	1.97691	2.63691	3.3976	3.9468	4.09987	4.25959	4.82379	4.41223	4.52191	4.42107	4.02265	3.73085	3.70146	3.28372	3.53912	3.35096	3.52011
			LR	1.83453	1.3937	1.83284	1.7846	1.83021	1.93021	2.34883	1.73894	2.34507	2.03235	2.51968	2.00778	2.57944	2.74722	2.4896	1.99652	1.97662	3.03939	2.79238	2.08107	2.81198	1.76912	1.59925	1.45461	1.00913	0.900021	0.876027	0.696946	0.727886	0.507859	0.699447	0.935503	1.57585	1.98433	1.97961	2.49539	1.99526	2.6671	1.9669	2.0792	2.10771	2.42055	1.6439	2.11832	1.95046	1.82038
			HL	1.25056	1.07153	1.20405	1.0978	1.06415	1.4299	1.04674	1.97143	2.06495	1.9184	1.88924	2.25321	1.94713	2.08156	1.45316	1.18898	1.22663	1.59282	1.49696	1.22725	1.67421	2.08771	2.06015	1.83362	1.84549	1.02926	0.451929	0.625179	0.535601	0.509023	0.632069	0.483921	0.338234	0.509761	1.02926	1.27486	1.43778	1.72472	1.31848	1.32316	1.21094	1.55467	1.6811	1.63459	1.70005	1.34396
			LL	1.77553	1.55445	1.49624	1.31564	1.38214	1.22832	1.36927	1.13899	1.29267	1.54534	1.74865	1.88268	2.14975	2.03097	1.87059	1.50802	1.51469	1.36756	1.40976	1.18433	1.38657	1.67983	2.38494	1.85897	1.40231	0.917833	0.487781	0.414711	0.545259	0.686933	0.786027	1.0423	1.14585	1.63517	2.0538	2.94232	3.90083	5.06437	5.61757	6.41537	6.36707	7.09486	7.15175	7.16703	7.51834	7.31516
		s.e.m.	HR	0.342676	0.353535	0.302989	0.334565	0.34073	0.328291	0.301882	0.350771	0.339695	0.348149	0.359525	0.352413	0.368745	0.393209	0.389314	0.411174	0.465122	0.652981	0.654237	0.714745	0.959249	0.860759	0.9727	0.922401	0.56917	0.410419	0.332208	0.496032	0.929303	1.0282	1.11936	1.15841	1.31219	1.60091	1.87056	2.15032	2.11157	2.09875	1.92593	1.68249	1.38875	1.18361	0.924892	0.945693	0.874747	0.861251
			LR	0.457697	0.346789	0.407155	0.33373	0.436823	0.398835	0.464789	0.510685	0.441192	0.462428	0.601079	0.48325	0.60314	0.7403	0.76071	0.573999	0.692254	0.775724	0.739603	0.576681	0.721038	0.463895	0.608376	0.569873	0.436607	0.283869	0.294115	0.214967	0.39401	0.237271	0.282741	0.373949	0.508348	0.580882	0.64856	0.747273	0.591938	0.761817	0.710275	0.711899	0.82163	0.770549	0.8431	0.917655	0.749072	0.639831
			HL	0.29097	0.321353	0.34591	0.299165	0.259435	0.377127	0.282634	0.45109	0.470109	0.640996	0.564083	0.739884	0.509194	0.554084	0.457045	0.382881	0.439721	0.47414	0.690905	0.477287	0.588113	1.08634	0.979837	0.955475	0.825602	0.379516	0.185283	0.18832	0.172972	0.199199	0.200297	0.176113	0.145494	0.176318	0.282571	0.5875	0.477373	0.516476	0.417834	0.398478	0.323233	0.452185	0.46713	0.468447	0.443574	0.46561
			LL	0.297529	0.242253	0.246364	0.213888	0.220911	0.231059	0.253321	0.231897	0.279427	0.427854	0.503809	0.669654	0.730493	0.746484	0.589256	0.441837	0.460044	0.453936	0.481739	0.418342	0.590498	0.868904	1.21043	0.933783	0.676329	0.383919	0.171851	0.130045	0.18793	0.263937	0.280428	0.432891	0.375838	0.512915	0.554371	0.64933	0.829184	1.12307	1.28074	1.56805	1.63138	1.84843	1.90648	1.76645	1.72546	1.50299
		p value (vs. HR)	LL vs. HR	0.334335	0.0744404	0.717826	0.0525415	0.158372	0.0222755	0.118993	0.0285231	0.0868426	0.0856978	0.398503	0.277378	0.53002	0.418268	0.563254	0.158691	0.162853	0.00603022	0.0318995	0.00342307	0.0205632	0.14779	0.864244	0.273973	0.438882	0.0506899	0.0902872	0.218811	0.171376	0.0369098	0.0654919	0.0267423	0.0713977	0.610589	0.751781	0.406676	0.0972383	0.141309	0.234216	0.124772	0.170371	0.0738224	0.0363692	0.0239421	0.00847931	0.00116153
			LL vs. LR	0.620661	0.264087	0.907539	0.394356	0.602051	0.174045	0.128222	0.830758	0.013052	0.158372	0.327615	0.817465	0.279949	0.306555	0.431681	0.571667	0.953114	0.0252124	0.357424	0.417427	0.144654	0.209744	0.253632	0.210355	0.0515474	0.903614	0.375445	0.605077	0.542919	0.478125	0.210789	0.61388	0.867689	0.779097	0.0557471	0.477995	0.00683438	0.00983241	0.0004422	0.0017572	0.00169025	0.00274661	3.50717e-05	8.85542e-05	2.19531e-05	2.34186e-06
			LL vs. HL	0.0301491	0.0146673	0.0980679	0.25795	0.270129	0.68077	0.137246	0.115589	0.166802	0.55529	0.322273	0.947759	0.377467	0.968667	0.510361	0.0947753	0.0547435	0.84506	0.168123	0.308538	0.90639	0.648737	0.16496	0.63844	1	0.954424	0.575453	0.737954	0.715095	0.350614	0.522985	0.229621	0.010973	0.00927103	0.126363	0.0183422	0.00708444	0.0259071	0.0111179	0.00081867	6.18357e-05	5.5202e-05	0.000154472	1.57739e-06	1.01454e-05	6.13238e-07
	ROC value at early stage
				Time bin
				1	2	3	4	5	6	7	8	9	10	11	12	13	14	15	16	17	18	19	20	21	22	23	24	25	26	27	28	29	30	31	32	33	34	35	36	37	38	39	40	41	42	43	44	45	46
	Trial types compared Trials compared Trials compired	Mean	LL vs. HR	0.480839	0.482043	0.475927	0.48174	0.48431	0.475802	0.483865	0.480934	0.474691	0.485637	0.487874	0.493488	0.512965	0.518143	0.506993	0.509132	0.520633	0.520127	0.549894	0.568509	0.588006	0.599498	0.605774	0.602294	0.587671	0.58983	0.578893	0.561787	0.551605	0.552027	0.54991	0.54155	0.554243	0.562276	0.557922	0.578079	0.564089	0.57215	0.547448	0.567679	0.549233	0.54486	0.563996	0.538914	0.550011	0.533485
			LL vs. LR	0.49346	0.489903	0.485227	0.488627	0.491674	0.48978	0.49207	0.490828	0.480522	0.48363	0.484547	0.494422	0.519509	0.52424	0.511919	0.516297	0.533187	0.534622	0.562516	0.588375	0.598715	0.603556	0.624467	0.635687	0.62746	0.609739	0.595045	0.591662	0.575965	0.573116	0.563734	0.554843	0.577582	0.576851	0.565955	0.589985	0.569346	0.584812	0.568239	0.574797	0.57143	0.562389	0.583283	0.552471	0.568944	0.557013
			LL vs. HL	0.497945	0.502703	0.500619	0.496407	0.501632	0.510041	0.509656	0.507342	0.502223	0.503545	0.509	0.508917	0.517404	0.513312	0.526115	0.540909	0.552205	0.545669	0.553679	0.573094	0.575689	0.584439	0.601907	0.610384	0.607423	0.598836	0.590789	0.576262	0.567663	0.563791	0.559783	0.555203	0.56105	0.572926	0.565556	0.574182	0.562316	0.575015	0.551681	0.555674	0.545524	0.549611	0.572199	0.547997	0.555634	0.540474
		s.e.m.	LL vs. HR	0.00824051	0.0059685	0.00756796	0.00940637	0.00889702	0.0088854	0.0125343	0.0119461	0.0168723	0.0186264	0.0206494	0.0225426	0.026936	0.0286475	0.0300196	0.0275581	0.018771	0.0212435	0.0263154	0.0302101	0.0302675	0.0288336	0.0267859	0.025812	0.0276489	0.0253501	0.0243687	0.0256628	0.0258086	0.0234135	0.022756	0.0212175	0.0223312	0.0198811	0.0240209	0.0244107	0.0239626	0.0234968	0.021454	0.0171313	0.0174489	0.0171508	0.0174181	0.0165183	0.0185643	0.0154874
			LL vs. LR	0.00812897	0.00817458	0.00904867	0.00861904	0.00728004	0.00991284	0.0121196	0.0136413	0.0165964	0.0179892	0.020138	0.0228097	0.0270499	0.0292042	0.0290186	0.0292489	0.0230942	0.020579	0.0246042	0.0265559	0.0283798	0.025286	0.0237848	0.0210632	0.0213095	0.0222938	0.0239062	0.0223826	0.0225331	0.0210754	0.0202391	0.0207621	0.0193744	0.0182027	0.0213028	0.0216023	0.0195198	0.0188615	0.0166083	0.0184439	0.0183235	0.0141781	0.0166263	0.0123938	0.0165406	0.0146803
			LL vs. HL	0.00522112	0.00636072	0.00663647	0.00682705	0.00502428	0.00853645	0.00537331	0.00496583	0.00455148	0.00399255	0.00441712	0.00521244	0.00620477	0.00832175	0.00843985	0.0126167	0.0154355	0.0172395	0.0207617	0.021418	0.0224154	0.0169818	0.0148932	0.0137832	0.01619	0.0157753	0.0173179	0.0179909	0.0176111	0.0173813	0.0157026	0.0173152	0.017623	0.0173135	0.019589	0.0197038	0.0193444	0.018336	0.015687	0.0163288	0.0179435	0.0144334	0.0173666	0.0149651	0.0172632	0.0140204
		p value	LL vs. HR	0.0550982	0.0019557	1.5299e-06	0.0550982	0.0507902	0.00773158	0.629676	0.22771	0.22771	0.15084	0.81438	0.810767	0.135095	0.0408132	0.452108	0.330783	0.810767	0.462448	0.0322303	0.00881336	0.000350837	0.000153632	1.91393e-07	0.000153632	5.07354e-05	0.000153632	0.000153632	0.000153632	0.000929647	0.00455585	0.00455585	0.0164098	0.00881336	1.52008e-05	0.00163675	0.000771854	0.0007717	5.07213e-05	0.0145414	5.9017e-06	0.0077326	0.0164115	5.07354e-05	0.00881336	0.0550942	0.15084
			LL vs. LR	0.22771	0.339559	0.00163675	0.15084	0.330775	0.0550942	0.339559	0.0550982	0.235533	0.0844204	1	0.462448	0.0230496	0.0195638	0.452108	0.462448	0.810767	0.462448	0.00396209	0.000120933	0.0181386	0.000929647	2.20811e-06	1.33412e-08	2.47825e-09	2.05112e-05	5.51278e-07	2.20811e-06	0.000153632	0.000929647	0.000929647	0.15722	2.04988e-05	5.07354e-05	0.0181404	5.9017e-06	0.0019557	2.20729e-06	0.0164115	2.0505e-05	2.20811e-06	0.000929647	2.05112e-05	0.00455585	0.000929472	0.000929472
			LL vs. HL	0.814377	0.330783	0.478603	0.22771	0.22771	0.14349	0.22771	0.0906352	0.810761	0.62234	0.462448	0.12554	0.00212336	0.00429834	0.00544402	0.000468811	6.80757e-06	6.80757e-06	0.0294226	1.52008e-05	0.000120933	1.91393e-07	3.3569e-11	7.46699e-10	1.33412e-08	1.91393e-07	1.33412e-08	2.05112e-05	0.00455585	0.000153632	0.000929647	0.0181386	0.0181404	0.00455585	0.00455585	0.0019557	0.00455585	2.05112e-05	0.000929647	0.000929647	0.000929472	0.000929647	0.000153632	0.00455585	0.0322303	0.058944
	ROC value at middle stage
				Time bin
				1	2	3	4	5	6	7	8	9	10	11	12	13	14	15	16	17	18	19	20	21	22	23	24	25	26	27	28	29	30	31	32	33	34	35	36	37	38	39	40	41	42	43	44	45	46
	Trial types compared Trials compared Trials compired	Mean	LL vs. HR	0.480663	0.484491	0.483785	0.488781	0.476882	0.480662	0.477878	0.475844	0.47418	0.478648	0.480206	0.481904	0.479796	0.469587	0.476001	0.481355	0.509772	0.509845	0.540957	0.555989	0.581131	0.592218	0.595183	0.602538	0.594108	0.57899	0.575077	0.577082	0.561163	0.562893	0.572485	0.560411	0.56883	0.559049	0.56037	0.559981	0.558111	0.562422	0.558532	0.55586	0.559179	0.556097	0.55248	0.547548	0.551274	0.556686
			LL vs. LR	0.485743	0.486185	0.483752	0.490657	0.47476	0.479243	0.473021	0.47225	0.46987	0.470088	0.476393	0.483408	0.483896	0.481169	0.493261	0.498395	0.515919	0.517763	0.543963	0.558239	0.57808	0.596806	0.606892	0.618234	0.615938	0.605581	0.591532	0.601219	0.590823	0.580718	0.589734	0.580807	0.587673	0.585812	0.579866	0.589433	0.578919	0.587901	0.578879	0.582537	0.585842	0.578815	0.566084	0.56307	0.56448	0.561654
			LL vs. HL	0.496918	0.496809	0.502563	0.508673	0.494753	0.486807	0.496807	0.496881	0.492996	0.489591	0.493976	0.503915	0.503913	0.506358	0.506813	0.506784	0.522127	0.520425	0.54179	0.541445	0.561793	0.578133	0.591921	0.594048	0.602967	0.592803	0.591554	0.599908	0.579842	0.575521	0.59048	0.58045	0.590064	0.584471	0.582707	0.580904	0.57711	0.584062	0.588495	0.583457	0.593509	0.577365	0.574335	0.565144	0.563002	0.564756
		s.e.m.	LL vs. HR	0.00961305	0.00934266	0.00907654	0.00922085	0.00992348	0.00921056	0.0112432	0.0119918	0.00920048	0.00941048	0.0108352	0.0108829	0.0135542	0.0137213	0.015133	0.0157679	0.0207515	0.0205518	0.0191311	0.0209168	0.0199675	0.0195533	0.0195301	0.0175126	0.017583	0.0169075	0.01834	0.0176884	0.0184766	0.0191418	0.0194996	0.0185208	0.0184627	0.018306	0.0176125	0.0170991	0.0175032	0.0166966	0.0171112	0.0189639	0.0185706	0.0175732	0.0164849	0.0174856	0.0148711	0.0152985
			LL vs. LR	0.00982585	0.0080141	0.00899882	0.00985367	0.0123994	0.0110027	0.0115718	0.0139068	0.0109127	0.012887	0.0131829	0.0135991	0.0147762	0.0123095	0.0110608	0.00985948	0.0176806	0.0180171	0.0191073	0.0215688	0.0233186	0.0228924	0.0216404	0.0202897	0.0168419	0.0181289	0.0171271	0.0184892	0.0180147	0.0186118	0.0187666	0.0187379	0.0195593	0.0203801	0.0195542	0.0186168	0.0194276	0.019999	0.0205268	0.0198724	0.0192766	0.0191717	0.0192752	0.0194114	0.0180466	0.01809
			LL vs. HL	0.00989046	0.0082971	0.00618963	0.00610603	0.00638529	0.00956304	0.00634712	0.00685489	0.00631049	0.00717272	0.00678089	0.0067453	0.00419775	0.00438482	0.00565689	0.00575753	0.0108673	0.0140098	0.0155825	0.0181097	0.0207396	0.0191786	0.0182474	0.0172628	0.0151096	0.0136608	0.0135964	0.0153584	0.0144059	0.0172056	0.0177484	0.0169478	0.0171493	0.0179632	0.0183019	0.0187045	0.0179645	0.0185399	0.01713	0.018102	0.0187189	0.0184636	0.0175858	0.0170323	0.0170486	0.0175872
		p value	LL vs. HR	0.189917	0.0286132	0.189917	0.829847	0.000375038	0.0473447	0.0473447	0.0710506	0.117525	0.00077577	0.255878	1	0.255883	0.0239476	0.00573548	0.0137697	0.660503	0.183509	0.0167347	0.00947248	2.04668e-07	1.81816e-08	1.8187e-08	1.3453e-09	1.8187e-08	4.80934e-06	1.92082e-06	2.0472e-07	3.52117e-05	0.0306898	0.000214965	0.00246253	0.00467543	0.0306898	0.0167347	3.52117e-05	0.000214965	0.000455413	9.83022e-05	0.0504217	0.0085952	0.0504217	0.00246253	0.00109598	0.0167357	0.00216419
			LL vs. LR	0.829847	0.511201	0.0758263	0.6605	0.0473447	0.0152946	0.00186027	0.0439818	0.0439797	2.05138e-05	0.000375038	0.111119	0.827225	0.368423	0.359357	0.655188	0.183509	0.6605	0.128438	0.00859457	0.000537457	9.82877e-05	1.50358e-05	1.8187e-08	1.3453e-09	1.8187e-08	1.9204e-06	1.92082e-06	1.50358e-05	0.00246253	1.50358e-05	0.000537521	9.83022e-05	0.00467581	0.000214965	9.83022e-05	0.00246253	0.00109598	0.000214965	3.52117e-05	0.000214965	0.000214965	0.00467581	0.00109598	0.000214936	0.195584
			LL vs. HL	0.0286057	1	0.271746	0.511193	0.827227	0.504591	0.255858	0.820661	0.824183	0.359337	0.24629	0.0105159	0.255863	0.0540433	0.452978	0.649051	0.24629	0.111115	6.26773e-05	0.000934746	0.000537521	9.83022e-05	2.0472e-07	1.92082e-06	8.28604e-11	1.44409e-11	8.28604e-11	8.28604e-11	1.50358e-05	0.000214965	1.92082e-06	1.92082e-06	5.17685e-08	5.47045e-07	0.000214965	3.52117e-05	5.17538e-08	4.80934e-06	1.9204e-06	0.00109598	1.50358e-05	9.82732e-05	0.000214936	3.52117e-05	0.000455413	0.000455413
	ROC value at late stage
				Time bin
				1	2	3	4	5	6	7	8	9	10	11	12	13	14	15	16	17	18	19	20	21	22	23	24	25	26	27	28	29	30	31	32	33	34	35	36	37	38	39	40	41	42	43	44	45	46
	Trial types compared Trials compared Trials compired	Mean	LL vs. HR	0.4867	0.491004	0.480898	0.481476	0.485565	0.491531	0.504031	0.494037	0.483177	0.474555	0.476311	0.494656	0.486178	0.487482	0.484551	0.469425	0.47252	0.499857	0.537219	0.552089	0.559835	0.572653	0.578009	0.578558	0.572438	0.560423	0.558465	0.55719	0.558162	0.560551	0.56745	0.561647	0.553978	0.556115	0.549542	0.535999	0.533344	0.536993	0.53723	0.526623	0.52802	0.526097	0.523677	0.519866	0.519689	0.510224
			LL vs. LR	0.49659	0.477306	0.48316	0.4847	0.47627	0.48512	0.482857	0.492208	0.476474	0.476694	0.481872	0.507299	0.505941	0.491682	0.501186	0.502633	0.493599	0.518357	0.548269	0.570932	0.579251	0.600959	0.618237	0.622941	0.617978	0.615735	0.614933	0.589291	0.586486	0.57812	0.583203	0.579814	0.565108	0.556519	0.559224	0.554263	0.555201	0.543198	0.545752	0.533241	0.53591	0.529262	0.539781	0.528872	0.521653	0.512872
			LL vs. HL	0.513997	0.518646	0.504622	0.499484	0.489205	0.498877	0.497219	0.516589	0.508278	0.510422	0.504684	0.513726	0.499308	0.508075	0.51195	0.516484	0.538091	0.543994	0.567732	0.585944	0.578572	0.591866	0.612408	0.625974	0.62162	0.615577	0.596344	0.589787	0.586256	0.576415	0.587725	0.580678	0.562858	0.576769	0.573385	0.561366	0.546487	0.530338	0.534143	0.533366	0.550288	0.540232	0.532773	0.519833	0.533764	0.518826
		s.e.m.	LL vs. HR	0.00632018	0.00618635	0.00565781	0.00734289	0.00884405	0.0116171	0.0119964	0.010246	0.0100786	0.0121988	0.0128795	0.00886456	0.0111924	0.0122006	0.0155365	0.0176786	0.0197788	0.0236876	0.0289435	0.0306793	0.0310928	0.0286754	0.0256335	0.0240173	0.0214358	0.0197646	0.0186069	0.0172545	0.017156	0.0163542	0.0138277	0.0135576	0.0131483	0.012816	0.0150431	0.0129927	0.0141609	0.0120831	0.0119656	0.0105254	0.0110831	0.0114875	0.00927126	0.00930414	0.0080713	0.00787479
			LL vs. LR	0.0061502	0.00709588	0.00744963	0.0078575	0.00959021	0.0123397	0.0135875	0.009988	0.0122797	0.0118248	0.0138329	0.0115255	0.0128045	0.00857623	0.00968871	0.0108604	0.0103766	0.0128697	0.0186854	0.0210828	0.0235832	0.0231458	0.0206312	0.0189889	0.0190805	0.0163019	0.0138653	0.0161007	0.0141063	0.0149256	0.0140523	0.0140755	0.0147045	0.0145714	0.0145065	0.0145636	0.0138299	0.0136799	0.0133351	0.012357	0.0125685	0.0123404	0.0110446	0.0112382	0.0105162	0.0095956
			LL vs. HL	0.00784785	0.00700372	0.00762178	0.00850296	0.00755626	0.00927356	0.0140171	0.00714242	0.00628838	0.00489849	0.00370598	0.0041548	0.00611186	0.00537605	0.00547798	0.00711536	0.00846008	0.0129974	0.0194105	0.0212252	0.026263	0.0238399	0.0216886	0.018005	0.0188151	0.0161697	0.0172189	0.0162709	0.0145608	0.0160535	0.0133655	0.0135744	0.0146698	0.0136508	0.0153403	0.0143025	0.0159578	0.0171491	0.0175624	0.0159199	0.0136478	0.0145098	0.0131998	0.0131976	0.0106361	0.0147024
		p value	LL vs. HR	0.131201	0.125821	0.0488571	0.0319493	0.0159999	0.192999	0.519877	0.281722	0.000499224	0.274949	0.662477	0.657047	0.161243	0.237768	0.0374561	0.045329	0.828177	0.274958	0.0273574	0.0822741	0.00498263	0.00136842	0.00136842	0.00136842	0.00136842	0.0189747	0.00136842	0.000284706	0.00554347	9.03005e-07	7.32447e-06	0.000284706	0.000591397	0.000591397	0.000591397	0.00136842	0.0319508	0.00136842	0.000591397	0.017537	0.0319508	0.0520979	0.00439974	0.0319493	0.0520959	0.0822741
			LL vs. LR	0.103164	0.0239614	0.682166	0.422329	0.00843301	1	0.318076	0.842831	0.838452	0.838452	0.534383	0.00327521	0.00420839	0.659317	0.182544	0.0027715	0.145323	0.00327521	0.000196079	1.59896e-05	4.03647e-06	5.15143e-10	5.90023e-11	2.13073e-13	5.90023e-11	5.90023e-11	1.01476e-14	8.80572e-09	5.89884e-11	8.80572e-09	8.80733e-09	2.18149e-07	7.11457e-07	1.71728e-06	0.00014062	2.3733e-08	1.15925e-05	3.12228e-05	0.000117063	0.000140608	0.000568477	0.00093396	2.06024e-05	0.00236423	0.0684201	0.1567
			LL vs. HL	0.0023637	9.49016e-05	0.0609689	0.156698	0.682175	0.00265928	0.416534	0.000196079	0.000394756	0.000243949	0.000625773	2.54439e-06	0.0226246	0.0026583	2.42682e-05	1.3005e-05	1.1611e-07	8.55929e-06	1.19563e-05	5.29691e-06	1.59428e-07	6.12936e-09	3.83138e-12	5.89884e-11	3.83037e-12	5.89884e-11	3.82935e-12	2.13073e-13	8.80895e-09	5.08661e-06	3.82935e-12	6.12936e-09	1.59428e-07	1.76599e-10	1.46257e-09	1.71706e-06	5.42015e-07	3.12412e-05	0.000286527	1.59403e-07	1.65252e-08	2.29026e-06	0.000286505	0.000140608	1.59914e-05	0.000117042
	Licking rate at early stage
				Time bin
				1	2	3	4	5	6	7	8	9	10	11	12	13	14	15	16	17	18	19	20	21	22	23	24	25	26	27	28	29	30	31	32	33	34	35	36	37	38	39	40	41	42	43	44	45	46
	Trial type	Mean	HR	0.0679724	0.0645161	0.0750981	0.0407197	0.106332	0	0.030303	0.030303	0	0	0.0322581	0.0322581	0.040404	0	0	0	0.0322581	0	0	0	0	0	0	0	0	0	0	0	0	0	0	0.0128205	0	0	0	0	0.09817	0.116599	0.559163	0.571357	1.35323	1.12297	1.36209	1.46761	2.50052	2.43192
			LR	0	0	0	0	0	0.132275	0	0.0322581	0	0.0322581	0.0692951	0.037037	0.0322581	0	0.0322581	0	0	0	0	0	0	0	0	0	0	0	0	0	0	0	0	0	0	0	0	0.0322581	0.0322581	0.0322581	0.0967742	0.129032	0.172401	0.333692	0.140332	0.140143	0.290323	0.205923
			HL	0	0	0.0111111	0	0.0740741	0	0	0	0	0	0	0	0	0	0	0	0	0	0	0	0	0	0	0	0	0	0	0	0	0	0	0	0	0	0	0	0.296296	0.444444	0.148148	0.148148	0.296296	0.222222	0.222222	0.179337	0.148148	0.679662
			LL	0	0.0215054	0.0740741	0	0.0740741	0.0740741	0.0740741	0	0	0	0	0	0.0740741	0	0	0	0	0	0	0	0	0	0	0	0	0	0	0	0	0	0	0	0	0.0740741	0	0.222222	0.37037	0.214815	0.931407	0.64877	1.82598	1.54066	2.17935	2.82267	3.40777	3.87847
		s.e.m.	HR	0.0252851	0.035941	0.0368328	0.0317019	0.075134	0	0.030303	0.030303	0	0	0.0179705	0.0179705	0.0280731	0	0	0	0.0179705	0	0	0	0	0	0	0	0	0	0	0	0	0	0	0.0128205	0	0	0	0	0.0414969	0.0614222	0.206234	0.21237	0.446061	0.303302	0.398366	0.386436	0.366297	0.40279
			LR	0	0	0	0	0	0.100989	0	0.0179705	0	0.0179705	0.0401533	0.037037	0.0179705	0	0.0179705	0	0	0	0	0	0	0	0	0	0	0	0	0	0	0	0	0	0	0	0	0.0179705	0.0179705	0.0179705	0.0539115	0.0718821	0.0898518	0.179361	0.0720705	0.0720528	0.161735	0.0937541
			HL	0	0	0.0111111	0	0.0412656	0	0	0	0	0	0	0	0	0	0	0	0	0	0	0	0	0	0	0	0	0	0	0	0	0	0	0	0	0	0	0	0.165063	0.247594	0.0825313	0.0825313	0.165063	0.123797	0.123797	0.0518983	0.0825313	0.245881
			LL	0	0.0215054	0.0412656	0	0.0412656	0.0412656	0.0412656	0	0	0	0	0	0.0412656	0	0	0	0	0	0	0	0	0	0	0	0	0	0	0	0	0	0	0	0	0.0412656	0	0.123797	0.206328	0.102833	0.36119	0.168673	0.29268	0.280869	0.22416	0.285271	0.498962	0.319428
	Licking rate at middle stage
				Time bin
				1	2	3	4	5	6	7	8	9	10	11	12	13	14	15	16	17	18	19	20	21	22	23	24	25	26	27	28	29	30	31	32	33	34	35	36	37	38	39	40	41	42	43	44	45	46
	Trial type	Mean	HR	0.12143	0.145585	0.00805153	0.340136	0.0644122	0.193894	0.0241546	0.27172	0.00805153	0	0	0.00805153	0	0	0.0563607	0.226757	0.0161031	0.0161031	0	0	0	0	0	0	0	0	0	0	0	0	0	0	0	0.226757	0.164014	0.115016	0.379796	0.57438	0.754419	1.30377	1.78709	2.53288	3.85672	3.77429	3.47909	4.91141
			LR	0	0.0925926	0	0.0203692	0	0.00829187	0	0	0.0165837	0.00829187	0.0587969	0	0	0.0165837	0	0	0.00829187	0	0	0	0	0	0	0	0	0	0	0	0	0	0	0	0	0	0	0	0.00829187	0	0.0165837	0.0304726	0.100884	0.136158	0.0705467	0.371508	0.307589	0.349597
			HL	0.292398	0	0.146199	0	0	0	0	0.194444	0.388889	0	0	0.194444	0	0	0	0	0	0	0	0	0	0	0	0	0	0	0	0	0	0	0	0	0	0	0	0	0.318853	0.172654	0.566207	0.172654	0.0529101	0.424673	0.592662	0.721292	1.09809	1.5763
			LL	0	0.0841751	0.0252525	0	0.0810185	0.0810185	0	0	0.0810185	0.0176367	0	0	0	0.16835	0	0	0	0	0	0	0	0	0	0	0	0	0	0	0	0	0	0	0	0	0.324074	0.576599	0.87963	1.40129	1.26437	2.60535	2.93499	3.52043	3.2324	3.72685	5.04068	4.8386
		s.e.m.	HR	0.031106	0.0422315	0.00805153	0.0927055	0.0203689	0.036262	0.0241546	0.0604997	0.00805153	0	0	0.00805153	0	0	0.0193907	0.0618036	0.0161031	0.0161031	0	0	0	0	0	0	0	0	0	0	0	0	0	0	0	0.0618036	0.0315336	0.0500653	0.110125	0.191046	0.209417	0.299168	0.347521	0.322379	0.376603	0.359552	0.390766	0.410017
			LR	0	0.0318561	0	0.0144532	0	0.00829187	0	0	0.0165837	0.00829187	0.0358297	0	0	0.0165837	0	0	0.00829187	0	0	0	0	0	0	0	0	0	0	0	0	0	0	0	0	0	0	0	0.00829187	0	0.0165837	0.0213251	0.0322443	0.0334774	0.0337278	0.0699756	0.07415	0.0664633
			HL	0.0796942	0	0.0398471	0	0	0	0	0.0668977	0.133795	0	0	0.0668977	0	0	0	0	0	0	0	0	0	0	0	0	0	0	0	0	0	0	0	0	0	0	0	0	0.0812958	0.0454604	0.108021	0.0454604	0.0529101	0.147098	0.125824	0.130615	0.225763	0.25497
			LL	0	0.0229423	0.0252525	0	0.0278741	0.0278741	0	0	0.0278741	0.0122916	0	0	0	0.0458845	0	0	0	0	0	0	0	0	0	0	0	0	0	0	0	0	0	0	0	0	0.111496	0.111768	0.148946	0.221203	0.243394	0.381989	0.267075	0.255356	0.326729	0.289075	0.309422	0.416373
	Licking rate at late stage
				Time bin
				1	2	3	4	5	6	7	8	9	10	11	12	13	14	15	16	17	18	19	20	21	22	23	24	25	26	27	28	29	30	31	32	33	34	35	36	37	38	39	40	41	42	43	44	45	46
	Trial type	Mean	HR	0.0801925	0	0	0.0400962	0	0	0	0	0	0.0055371	0	0	0	0	0	0	0	0	0	0	0	0	0	0	0	0	0	0	0	0	0	0	0	0	0	0	0.0682494	0.322214	0.704162	0.778803	1.74621	2.67085	3.2242	3.5826	3.60377	4.50471
			LR	0.310078	0.171359	0	0	0.155039	0.155039	0	0	0	0	0	0.155039	0	0.171359	0.171359	0	0	0	0	0	0	0	0	0	0	0	0	0	0	0	0	0	0	0	0	0	0	0.0664452	0	0	0	0	0	0.237804	0	0.23625
			HL	0.0213847	0.0213847	0.0213847	0.0213847	0.0213847	0.0213847	0.0213847	0.0213847	0.0213847	0.0213847	0.0213847	0.0213847	0.0213847	0.0213847	0.0213847	0.0213847	0.107517	0.0213847	0.0213847	0.0213847	0.0213847	0.0213847	0.0213847	0.0213847	0.0213847	0.0213847	0.0213847	0.0213847	0.0213847	0.0213847	0.0213847	0.0213847	0.0213847	0.0213847	0.0213847	0.0213847	0.0213847	0.0213847	0.0213847	0.0213847	0.0213847	0.0213847	0.0213847	0.672547	0.0213847	0.137664
			LL	0.0523165	0.0357782	0.0458565	0.0357782	0.0357782	0	0	0	0	0.0816347	0.0357782	0	0.0357782	0.0357782	0.0458565	0.0357782	0	0.0680779	0	0	0	0	0	0	0	0	0	0	0	0	0	0	0	0	0.0652364	0.133174	0.465474	1.23064	1.31646	2.1083	2.49884	3.08311	3.42184	4.38949	4.99688	5.77675
		s.e.m.	HR	0.0341127	0	0	0.0170563	0	0	0	0	0	0.0055371	0	0	0	0	0	0	0	0	0	0	0	0	0	0	0	0	0	0	0	0	0	0	0	0	0	0	0.0243221	0.0683563	0.135873	0.140202	0.282331	0.340929	0.383624	0.409009	0.409827	0.442311
			LR	0.131902	0.059963	0	0	0.0659512	0.0659512	0	0	0	0	0	0.0659512	0	0.059963	0.059963	0	0	0	0	0	0	0	0	0	0	0	0	0	0	0	0	0	0	0	0	0	0	0.0464211	0	0	0	0	0	0.0721685	0	0.114804
			HL	0.00819413	0.00819413	0.00819413	0.00819413	0.00819413	0.00819413	0.00819413	0.00819413	0.00819413	0.00819413	0.00819413	0.00819413	0.00819413	0.00819413	0.00819413	0.00819413	0.0363578	0.00819413	0.00819413	0.00819413	0.00819413	0.00819413	0.00819413	0.00819413	0.00819413	0.00819413	0.00819413	0.00819413	0.00819413	0.00819413	0.00819413	0.00819413	0.00819413	0.00819413	0.00819413	0.00819413	0.00819413	0.00819413	0.00819413	0.00819413	0.00819413	0.00819413	0.00819413	0.226548	0.00819413	0.0809208
			LL	0.0168853	0.0137094	0.0160464	0.0137094	0.0137094	0	0	0	0	0.0191653	0.0137094	0	0.0137094	0.0137094	0.0160464	0.0137094	0	0.017936	0	0	0	0	0	0	0	0	0	0	0	0	0	0	0	0	0.0243053	0.0471927	0.100792	0.255215	0.259974	0.393268	0.360823	0.399594	0.428452	0.49226	0.342262	0.345052
[truncated: 94 more columns]

## Sheet: Figure 6–figure supplement 1B
Figure 6–figure supplement 1B	Data	Averaged firing rate for 5 s after the FL in the LL trial of aDLS neurons
	Softwear	matlab ver 2019
	Group	Number of FL-LL neurons in the aDLS; 30, 36, and 43 neurons for early, middle, and late stages, respectively.
	Dependent variable	Firing rate (Hz)
	Stats	Kruskalwallis test; LL trial, χ2 = 4.473681814949149, p = 0.106795348425321
			Firing rate
	Learning stage	early	1.68824
		early	5.21765
		early	1.00588
		early	9.11176
		early	3.64706
		early	2.01765
		early	1.75294
		early	0.985
		early	5.35
		early	5.635
		early	1.665
		early	1.065
		early	2.48
		early	2.95789
		early	2.94737
		early	2.46842
		early	3.97419
		early	5.175
		early	3.31944
		early	0.875
		early	2.224
		early	0.524638
		early	1.05085
		early	0.60678
		early	11.8815
		early	4.85926
		early	13.3778
		early	8.20282
		early	2.31795
		early	1.85333
		middle	1.38571
		middle	1.46939
		middle	1.6
		middle	0.24058
		middle	1.22319
		middle	1.07536
		middle	2.32698
		middle	0.711111
		middle	8.03636
		middle	2.98485
		middle	9.88485
		middle	14.3606
		middle	6.34848
		middle	11.6939
		middle	6.78788
		middle	1.12424
		middle	0.312121
		middle	4.07879
		middle	9.68182
		middle	11.6417
		middle	3.66667
		middle	2.93333
		middle	2.36667
		middle	4.13333
		middle	1.22917
		middle	5.41667
		middle	0.344681
		middle	0.432558
		middle	3.43077
		middle	1.79231
		middle	6.16923
		middle	4.92308
		middle	6.34583
		middle	1.6375
		middle	3.33333
		middle	1.2625
		late	3.17619
		late	2.97857
		late	5.12143
		late	2.40488
		late	2.2
		late	3.34634
		late	1.15122
		late	0.558537
		late	0.33012
		late	0.838554
		late	2.22169
		late	4.42169
		late	1.2988
		late	0.604819
		late	0.173494
		late	2.38356
		late	1.92405
		late	1.48354
		late	8.30633
		late	0.922222
		late	0.530556
		late	0.827778
		late	0.927778
		late	0.0916667
		late	4.83684
		late	4.68056
		late	4.41972
		late	3.08169
		late	5.64225
		late	0.822535
		late	0.453521
		late	2.88451
		late	1.70423
		late	4.2359
		late	0.64359
		late	1.94872
		late	4.27179
		late	1.43846
		late	8.43846
		late	3.81622
		late	1.41081
		late	1.7013
		late	0.568831

## Sheet: Figure 6–figure supplement 1C
Figure 6–figure supplement 1C	Data	Averaged total number of time bins above 3 S.D. of the baseline firing for 5 s after the FL in the LL trial of aDLS neurons
	Softwear	matlab ver 2019
	Group	Number of FL-LL neurons in the aDLS; 30, 36, and 43 neurons for early, middle, and late stages, respectively.
	Dependent variable	Number of bin
	Stats	Kruskalwallis test; LL trial, χ2 = 6.306139609235632, p = 0.042720780916450 post hoc Tukey–Kramer test; early vs. middle; p = 0.988982998671812 early vs. late; p = 0.080823860909888 middle vs. late; p = 0.088894573990614
			Total number of time bins
	Learning stage	early	1
		early	0
		early	8
		early	45
		early	13
		early	16
		early	64
		early	0
		early	0
		early	0
		early	0
		early	3
		early	7
		early	12
		early	10
		early	3
		early	88
		early	0
		early	6
		early	55
		early	1
		early	2
		early	1
		early	4
		early	90
		early	0
		early	12
		early	31
		early	31
		early	1
		middle	8
		middle	0
		middle	0
		middle	9
		middle	0
		middle	0
		middle	8
		middle	5
		middle	26
		middle	53
		middle	82
		middle	57
		middle	9
		middle	82
		middle	74
		middle	0
		middle	0
		middle	8
		middle	9
		middle	44
		middle	0
		middle	3
		middle	4
		middle	73
		middle	33
		middle	0
		middle	0
		middle	1
		middle	1
		middle	1
		middle	18
		middle	4
		middle	0
		middle	0
		middle	5
		middle	21
		late	0
		late	5
		late	32
		late	1
		late	24
		late	5
		late	16
		late	4
		late	2
		late	3
		late	0
		late	6
		late	0
		late	3
		late	0
		late	0
		late	0
		late	29
		late	13
		late	7
		late	0
		late	4
		late	3
		late	0
		late	20
		late	30
		late	1
		late	0
		late	0
		late	42
		late	3
		late	0
		late	0
		late	7
		late	0
		late	0
		late	0
		late	0
		late	0
		late	4
		late	0
		late	0
		late	0

## Sheet: Figure 6–figure supplement 1D
Figure 6–figure supplement 1D	Data	Cumulative probability of the proportion of FL-LL neuron number in the pVLS at the early, middle, and late stages
	Softwear	matlab ver 2019
	Group	Number of FL-LL neurons in the pVLS; 30, 36, and 43 neurons for early, middle, and late stages, respectively.
	Stats	Kruskalwallis test; χ2 = 18.951803808039195, p = 0.0000766775260185422 post hoc Tukey–Kramer test; early vs. middle; p = 0.003072892773633 early vs. late; p = 0.670700592575302 middle vs. late; p = 0.000110687696999178
			Cumulative probability of the proportion
	Learning stage	early	5.51471
		early	6.61765
		early	5.51471
		early	6.25
		early	6.25
		early	5.88235
		early	5.14706
		early	5.14706
		early	4.41176
		early	5.88235
		early	5.14706
		early	6.25
		early	4.04412
		early	6.61765
		early	6.98529
		early	4.77941
		early	5.14706
		early	5.51471
		early	6.25
		early	5.51471
		middle	5.49451
		middle	4.94505
		middle	4.67033
		middle	4.12088
		middle	3.02198
		middle	4.67033
		middle	4.67033
		middle	3.02198
		middle	5.76923
		middle	5.21978
		middle	6.04396
		middle	5.49451
		middle	4.94505
		middle	4.12088
		middle	4.3956
		middle	5.49451
		middle	5.21978
		middle	3.57143
		middle	3.57143
		middle	4.94505
		late	7.22222
		late	5.27778
		late	6.38889
		late	5.83333
		late	6.66667
		late	5.27778
		late	5.55556
		late	6.66667
		late	5.55556
		late	6.11111
		late	5.83333
		late	6.11111
		late	6.94444
		late	4.16667
		late	6.38889
		late	5.83333
		late	5.83333
		late	5.55556
		late	4.72222
		late	5

## Sheet: Figure 6–figure supplement 1E
Figure 6–figure supplement 1E	Data	Distribution of the correlation coefficient between the numbers of spikes of aDLS FL-LL neurons and licking
	Softwear	matlab ver 2019
	Group	Number of FL-LL neurons in the aDLS; 30, 36, and 43 neurons for early, middle, and late stages, respectively.
	Dependent variable
	Stats	Pearson's linear correlation coefficient;
			r	p value
	# of neurons	1	-0.156	0.446655
		2	0.101195	0.601444
		3	-0.113025	0.574586
		4	-0.129607	0.510968
		5	0.265792	0.12868
		6	-0.222068	0.320581
		7	0.00938182	0.966948
		8	0.120055	0.535042
		9	-0.0248948	0.880423
		10	0.0894706	0.593215
		11	-0.0663982	0.692053
		12	-0.0648211	0.758207
		13	-0.408996	0.00878238
		14	0.193809	0.287852
		15	-0.118226	0.479608
		16	-0.421041	0.00847836
		17	0.0720923	0.658439
		18	0.137689	0.390632
		19	0.263304	0.0841861
		20	-0.0413449	0.888396
		21	0.348657	0.0808761
		22	-0.0722557	0.57678
		23	-0.229606	0.0616095
		24	0.10654	0.340759
		25	-0.204734	0.061742
		26	-0.0855494	0.474907
		27	-0.294338	0.00764785
		28	-0.288494	0.00857724
		29	-0.209542	0.0752011
		30	-0.451768	0.0007741
		31	-0.165277	0.429802
		32	-0.275301	0.0184074
		33	0.0209601	0.881577
		34	0.0932694	0.442503
		35	0.0927141	0.445236
		36	0.00187977	0.989663
		37	-0.394466	0.0417375
		38	0.036025	0.850098
		39	0.256084	0.0427832
		40	0.0479901	0.751464
		41	-0.517795	0.102793
		42	0.090333	0.496246
		43	0.058557	0.674049
		44	-0.219698	0.0862117
		45	-0.162665	0.154758
		46	-0.190174	0.132278
		47	0.0721856	0.600466
		48	-0.0772018	0.582692
		49	-0.0647382	0.645124
		50	0.0664479	0.610892
		51	0.0305588	0.833147
		52	-0.160998	0.200123
		53	0.233369	0.0863962
		54	-0.0176309	0.891813
		55	0.049564	0.702046
		56	-0.221263	0.348504
		57	-0.0947535	0.445635
		58	0.292549	0.146975
		59	-0.0463632	0.837667
		60	-0.174953	0.392641
		61	0.0555672	0.810925
		62	0.218453	0.131561
		63	-0.112189	0.369799
		64	-0.140816	0.259419
		65	-0.467742	0.000213757
		66	0.0664258	0.679874
		67	0.0237004	0.892501
		68	0.0953675	0.59755
		69	-0.246264	0.130721
		70	-0.173519	0.163519
		71	-0.0176666	0.889799
		72	0.145766	0.363158
		73	-0.47438	0.00172747
		74	-0.0355664	0.8602
		75	0.282864	0.137062
		76	-0.347182	0.064999
		77	-0.298501	0.0727251
		78	0.257392	0.0956527
		79	0.022408	0.861615
		80	0.17229	0.188057
		81	-0.124845	0.368399
		82	-0.0504873	0.701652
		83	-0.312195	0.13749
		84	0.110919	0.452934
		85	0.0990238	0.459575
		86	-0.0125527	0.92549
		87	0.134938	0.27628
		88	-0.059393	0.698348
		89	0.0810065	0.505
		90	0.100019	0.420641
		91	0.0733523	0.608971
		92	-0.199284	0.130229
		93	-0.200213	0.0941149
		94	0.00497336	0.976029
		95	0.112127	0.601925
		96	0.334905	0.148915
		97	-0.0712392	0.746688
		98	-0.264289	0.274223
		99	-0.369488	0.0755723
		100	0.29322	0.164353
		101	0.00846353	0.967972
		102	-0.0194993	0.906209
		103	0.32584	0.0642415
		104	-0.0925276	0.536189
		105	0.0720052	0.671925
		106	0.0766153	0.516465
		107	-0.0973335	0.447915
		108	0.0692319	0.577738
		109	-0.263869	0.109426
