# Supplementary material for: Acquisition of auditory discrimination mediated by different processes through two distinct circuits linked to the lateral striatum
Source: eLife. 2025 Jul 11;13:RP97326. doi: 10.7554/eLife.97326 (PMC12252547; doi:10.7554/eLife.97326)
Supplement: Figure 6—figure supplement 2—source data 1. [file elife-97326-fig6-figsupp2-data1.xlsx]

## Sheet: Figure 6–figure supplement 2A
Figure 6–figure supplement 2A	Data	Mean firing rate and auROC values of pVLS FL-LL neurons
	Softwear	matlab ver 2019
	Group	Number of FL-LL neurons in the pVLS; 16, 11, and 63 neurons for early, middle, and late stages, respectively.
	Stats
	Firing rate at early stage
				Time bin
				1	2	3	4	5	6	7	8	9	10	11	12	13	14	15	16	17	18	19	20	21	22	23	24	25	26	27	28	29	30	31	32	33	34	35	36	37	38	39	40	41	42	43	44	45	46
	Trial type	Mean	HR	2.56024	2.62192	2.68545	3.05745	2.74944	2.6784	2.73295	2.63235	2.16498	2.36759	2.3767	2.32616	2.5439	2.22216	2.42183	2.51167	2.16119	1.91265	2.01798	1.96534	2.28381	1.96888	2.23137	2.01791	1.3501	1.59008	1.57441	1.63502	1.50304	2.04305	2.40117	2.4522	2.57858	3.26911	2.7908	2.87804	3.52907	2.93808	2.72306	3.82388	2.76197	3.51188	4.0798	3.96512	4.36182	4.37092
			LR	2.30363	2.76628	2.85919	2.10569	2.41564	2.3334	2.07904	2.44993	2.39445	2.37425	2.32653	2.07647	2.19672	1.70119	2.11146	1.99815	2.1233	1.92005	2.23985	1.89289	1.95655	1.46834	2.18632	2.26701	1.80949	1.26971	1.21233	1.31907	1.78661	2.1217	2.42222	2.13272	2.78107	2.15748	2.42245	2.29386	2.10054	2.24418	2.56275	2.72705	2.20745	2.89807	3.04999	2.91293	3.26656	3.54182
			HL	2.76989	2.46434	2.22244	2.125	2.46087	2.49465	2.36806	2.67427	1.97244	2.50253	2.45624	2.31134	2.40669	2.63101	2.57314	2.32892	2.15856	1.81366	1.92824	1.92361	1.84722	1.65625	2.28356	1.74306	1.7317	1.72801	1.5081	1.55324	1.90394	2.07639	1.84281	2.25275	2.08102	2.04326	2.40785	2.13795	1.86546	2.38238	2.49327	2.23517	2.13817	2.41435	2.40184	2.48886	2.74002	2.48004
			LL	2.59838	2.91041	2.54714	2.25118	2.53839	2.50722	2.45517	2.8292	2.70713	2.17419	2.54801	2.06243	2.63054	2.1138	2.60639	2.20701	2.47886	2.3506	2.24474	2.47944	2.45007	2.24098	2.48339	2.39105	1.78545	1.44488	1.48729	2.05978	1.85063	1.62209	1.85116	1.64067	1.22332	2.0166	2.08594	1.90056	2.00321	2.32336	2.09567	2.49454	2.56771	2.6447	2.66657	3.35321	3.7229	3.6431
		s.e.m.	HR	1.73554	1.72991	2.02859	1.95684	1.93453	1.79316	1.92226	1.96839	1.36088	1.63404	1.69606	1.57598	1.61957	1.55988	1.48666	1.59755	1.32839	1.24712	1.27969	1.16179	1.49686	1.23607	1.2327	1.0715	0.7358	0.808237	0.887973	0.924527	0.891865	1.32362	1.44983	1.70402	1.81288	2.20509	1.89235	1.84669	2.27954	1.99208	1.84177	2.45005	1.80584	1.99273	2.07092	1.91241	2.17657	1.95681
			LR	1.78788	1.80717	1.88832	1.64917	1.73167	1.63738	1.51692	1.70463	1.54177	1.63746	1.64943	1.48781	1.35769	1.20188	1.39021	1.21406	1.33278	1.24795	1.47819	1.14612	1.26001	0.970894	1.27919	1.33675	1.00442	0.725278	0.64677	0.716862	1.10821	1.33652	1.50178	1.50736	1.65542	1.56883	1.75164	1.45245	1.54532	1.56928	1.6133	1.5046	1.39014	1.47722	1.69562	1.66139	1.62882	2.1281
			HL	1.70074	1.7907	1.68552	1.60913	1.82086	1.80056	1.62315	1.84518	1.52958	1.86168	1.92821	1.77822	1.82016	2.10172	1.95868	1.85975	1.83236	1.35518	1.30653	1.5655	1.49091	1.06379	1.49658	1.2722	1.1945	1.19063	0.898304	0.913625	1.17839	1.25043	1.18363	1.51982	1.51397	1.3457	1.43273	1.11075	1.07679	1.45162	1.48929	1.40263	1.3281	1.46545	1.36324	1.61188	1.44156	1.4462
			LL	1.69975	2.00672	2.03209	1.9159	1.76584	1.93788	1.90531	2.08412	2.09702	1.5567	1.99229	1.75855	1.89072	1.71913	1.86328	1.76177	1.99883	1.81058	1.71515	1.65735	1.61127	1.6262	1.67243	1.65257	1.10466	0.759451	0.767588	1.08946	1.0056	1.09363	1.1322	1.09387	0.837987	1.35376	1.17023	0.998761	0.939989	1.29333	1.13538	1.25794	1.26736	1.43927	1.5321	1.73092	1.979	2.15867
		p value (vs. HR)	LL vs. HR	0.537361	0.765332	0.759162	0.102718	0.676003	0.445507	0.811231	0.687201	0.755244	0.879432	0.676065	0.200956	0.919775	0.948166	0.655984	0.361781	0.918603	0.882082	0.933749	1	0.394175	0.911445	0.755244	0.882028	0.963417	0.268973	0.436206	0.686271	0.757412	0.405634	0.640421	0.757412	0.867905	0.573105	0.22786	0.78298	0.427098	0.657619	0.718707	0.525323	0.478491	0.801226	0.952406	0.650692	0.572783	0.622665
			LL vs. LR	0.771089	0.790489	0.951091	1	0.647183	0.40534	0.511203	0.966846	0.449508	0.667767	0.765355	0.338777	0.886246	0.948166	0.19787	0.535846	0.728246	1	0.602966	0.493421	0.394175	0.926911	0.949319	0.750599	0.538926	0.793815	0.901406	0.854453	0.793815	0.625997	0.830672	0.793815	0.435267	0.66465	0.343719	0.900767	0.342557	0.716917	0.336846	0.984786	0.598349	0.969107	0.682045	0.984295	0.325041	0.856154
			LL vs. HL	0.4261	0.9036	0.731859	0.295328	0.799393	0.841332	0.762052	0.386348	0.79481	0.65268	0.437351	0.449115	0.983922	0.7667	0.567587	0.385674	0.338777	0.687132	0.60039	0.102758	0.243783	0.858747	0.949295	0.354042	0.651672	1	0.757412	0.739369	0.633508	0.394175	0.633508	0.268973	0.47449	0.515528	0.743442	0.466224	0.969583	0.410284	0.336846	0.550463	0.923296	0.77274	0.61684	0.922258	0.541544	0.920761
	Firing rate at middle stage
				Time bin
				1	2	3	4	5	6	7	8	9	10	11	12	13	14	15	16	17	18	19	20	21	22	23	24	25	26	27	28	29	30	31	32	33	34	35	36	37	38	39	40	41	42	43	44	45	46
	Trial type	Mean	HR	0.605624	0.97468	0.848798	0.542145	0.892889	0.925868	0.686407	0.812874	1.15191	0.813412	0.67887	0.723485	0.61582	0.994579	0.647019	0.680461	0.990787	0.87897	0.637884	0.546235	0.519715	0.621179	0.752656	1.35364	1.25287	1.01457	0.80874	0.37733	0.45575	0.2529	0.191333	0.25558	0.338364	0.228974	0.374647	0.332606	0.389013	0.470603	0.506239	0.917927	0.859971	1.27121	1.95262	1.59769	1.88613	3.0238
			LR	1.12538	1.03693	1.02675	1.38172	0.772126	1.18354	0.749969	0.9859	0.995714	1.23196	1.38814	1.31668	1.40358	0.855256	0.815061	1.44409	1.10212	0.970363	1.26368	1.01196	1.22433	1.2213	1.5116	1.10399	0.931167	1.06745	0.96087	0.26579	0.433844	0.398177	0.32302	0.544163	0.524917	0.380685	0.521893	0.516928	0.418699	0.470751	0.458823	0.38963	0.852665	0.699886	0.769727	0.599176	0.62876	1.05779
			HL	0.746468	0.359424	0.232323	0.539688	0	0.338092	0.569991	0.632151	0.390831	0.568437	0.378072	0.429002	0.572092	0.49818	0.200466	0.602845	0.939067	0.801865	0.463092	0.421134	0.459305	0.121212	0.232323	0.496626	1.25919	0.631702	1.09169	0.421134	0.200466	0	0.268939	0.0606061	0	0.174242	0.393357	0.504468	0.301343	0.340909	0.17803	0.161483	0.418768	0.375	0.623313	0.442758	0.818862	0.671973
			LL	0.647072	0.517238	0.589146	0.821549	0.449408	0.372263	0.659674	0.389382	0.534518	0.420829	0.670029	0.261105	0.732105	0.424449	0.995676	0.642803	0.811083	0.857195	1.074	0.77492	0.706806	0.818222	0.52509	0.605304	1.44086	0.937777	0.740613	0.589549	0.196193	0.281596	0.158314	0.145589	0.359609	0.330468	0.505202	0.485051	0.848026	0.905793	1.22894	1.30145	1.89928	2.00838	2.91386	2.99918	4.41566	6.2539
		s.e.m.	HR	0.281205	0.374755	0.429144	0.245357	0.380489	0.35304	0.226139	0.233866	0.488173	0.247449	0.353482	0.377553	0.269117	0.379384	0.234367	0.254599	0.510461	0.475117	0.393961	0.299195	0.305016	0.302704	0.318346	0.540461	0.536503	0.354176	0.262033	0.158199	0.165965	0.13916	0.0846559	0.117858	0.153585	0.136857	0.189022	0.16165	0.215856	0.198355	0.199698	0.322445	0.307802	0.414293	0.679317	0.555579	0.696554	0.972371
			LR	0.384584	0.39788	0.345372	0.656261	0.264391	0.442683	0.27374	0.263894	0.528617	0.336888	0.811352	0.935143	0.767029	0.598809	0.596463	1.01722	0.784289	0.718928	0.741059	0.535733	0.799838	0.67192	0.569225	0.669688	0.379781	0.386001	0.324332	0.121	0.178026	0.18197	0.149266	0.184221	0.165456	0.148235	0.141818	0.232404	0.139959	0.198046	0.154301	0.163796	0.393164	0.366943	0.44914	0.248418	0.482211	0.433425
			HL	0.277915	0.173448	0.183772	0.297914	0	0.159794	0.347482	0.311417	0.278638	0.418428	0.277665	0.214087	0.297456	0.163552	0.146761	0.177109	0.54812	0.43735	0.179361	0.283247	0.17897	0.0813116	0.132704	0.296038	0.824171	0.291293	0.579237	0.192861	0.146761	0	0.160035	0.0606061	0	0.123324	0.291203	0.285779	0.17076	0.340909	0.0919917	0.118807	0.206153	0.289494	0.295115	0.174737	0.402347	0.297058
			LL	0.260937	0.18561	0.328347	0.407242	0.147236	0.173607	0.30064	0.160026	0.292454	0.209159	0.301357	0.09346	0.345754	0.18112	0.463082	0.288135	0.344936	0.405416	0.576523	0.317984	0.30674	0.43402	0.251588	0.260538	1.0351	0.522296	0.363391	0.382355	0.0865591	0.154126	0.0851882	0.083636	0.137157	0.165506	0.25611	0.328889	0.661457	0.692623	0.725196	0.870687	1.18826	1.41726	1.82597	1.96516	2.18217	2.85784
		p value (vs. HR)	LL vs. HR	0.586276	0.438961	0.255069	0.885958	0.972488	0.325928	0.733743	0.190142	0.36973	0.178742	0.54217	0.629316	0.863131	0.334354	0.839948	0.785529	0.888359	0.55767	0.604926	0.888359	0.409561	0.88592	0.70441	0.334354	0.623303	0.490472	0.623191	0.461299	0.298272	0.878864	0.75076	0.492978	0.914312	0.691333	0.774161	0.825082	0.703294	0.712609	0.704497	0.490337	0.946359	0.229436	0.668539	0.640429	0.293015	0.264292
			LL vs. LR	0.270469	0.363588	0.182471	0.574565	0.540481	0.0770195	0.45426	0.0890861	0.606066	0.0411989	0.414152	0.970606	0.809229	0.882862	0.399629	0.787468	1	0.712609	0.633924	0.586276	0.774087	0.673353	0.0991788	0.805941	0.673651	0.247472	0.447578	0.811628	0.332839	0.507155	0.423626	0.105069	0.490472	0.54217	0.407387	0.712609	0.315244	0.605938	0.730099	0.774235	0.55767	0.916122	0.134599	0.540481	0.017297	0.0148304
			LL vs. HL	0.613524	0.451477	0.33599	0.631916	0.00254825	0.911977	0.376668	0.774235	0.662161	0.75076	0.285246	0.970606	0.566053	0.648113	0.0553491	0.736419	0.971388	0.768235	0.725625	0.401891	0.699462	0.176672	0.285075	0.492978	1	0.971379	0.857484	0.811628	0.530163	0.0359098	0.867114	0.329169	0.0157621	0.379696	0.340436	0.909029	1	0.179816	0.104945	0.141649	0.206582	0.233406	0.220888	0.369728	0.0263579	0.00283982
	Firing rate at late stage
				Time bin
				1	2	3	4	5	6	7	8	9	10	11	12	13	14	15	16	17	18	19	20	21	22	23	24	25	26	27	28	29	30	31	32	33	34	35	36	37	38	39	40	41	42	43	44	45	46
	Trial type	Mean	HR	1.10514	1.04697	0.887277	1.12492	1.14192	1.2327	1.10054	1.11611	1.12792	1.22031	1.38159	1.34214	1.4756	1.38096	1.35935	1.27682	1.38401	1.38627	1.35005	1.47681	1.81497	1.53908	1.56039	1.53476	1.47125	1.58029	1.42553	1.49918	1.63392	1.62281	1.9624	2.01706	2.18229	2.32721	2.69692	3.16364	3.46478	3.87067	4.48444	5.80133	6.03435	6.51133	6.80938	6.59572	6.19432	6.08332
			LR	1.19599	1.04375	1.26328	1.04599	1.30789	1.12186	1.03404	0.884081	1.31797	1.06405	1.08883	1.09123	1.56529	1.14727	1.22484	1.38691	1.00807	1.16417	1.29204	1.45633	1.62591	1.50012	2.13084	1.59145	1.71831	1.51291	1.32652	1.80967	1.73852	1.81447	2.09547	1.92171	2.06774	2.33519	2.38955	2.43677	2.13426	2.89568	2.85709	2.88138	2.79614	2.75129	2.83182	3.21404	2.51465	2.56091
			HL	1.29434	1.44801	1.28338	1.6307	1.66849	1.31074	1.1893	1.44173	1.70899	1.32821	1.78771	1.79554	1.71206	1.25275	1.64636	1.42181	1.77263	1.71945	1.57504	1.94373	2.44129	2.31307	2.46078	2.44362	2.81154	1.68441	1.90783	1.80599	1.71647	2.01511	2.04497	1.8711	1.88179	2.21703	2.06034	2.06872	2.33392	1.67229	2.04493	1.73633	2.29147	2.20958	2.01417	1.9525	2.38433	1.90432
			LL	1.16418	1.06792	1.25983	1.18993	1.21045	1.1134	1.20197	1.24972	1.42808	1.37263	1.38988	1.36042	1.46946	1.46719	1.43233	1.49549	1.56	1.49027	1.60071	1.78307	1.90435	2.0028	1.84882	2.1187	2.21468	2.28661	2.25037	1.97627	1.91724	1.79046	2.20439	2.47372	2.49822	2.70911	3.05993	3.61128	4.35038	4.51029	4.78166	5.07895	5.18373	5.62363	6.06816	6.65186	6.83567	7.39852
		s.e.m.	HR	0.230011	0.214436	0.184201	0.249586	0.247481	0.254885	0.210342	0.233313	0.283884	0.272339	0.287214	0.295944	0.346213	0.294606	0.284049	0.299811	0.311586	0.327768	0.327862	0.340284	0.42379	0.391293	0.361281	0.405622	0.349561	0.378437	0.333751	0.381693	0.377343	0.404606	0.511588	0.53814	0.540971	0.604567	0.77293	0.926258	0.996896	1.12858	1.2313	1.42923	1.49794	1.58221	1.56901	1.43775	1.3028	1.24267
			LR	0.308213	0.232652	0.270683	0.296056	0.364791	0.274784	0.299156	0.195914	0.320075	0.307942	0.290535	0.29819	0.436105	0.318517	0.329738	0.347577	0.282825	0.291944	0.31017	0.424716	0.449382	0.386869	0.561083	0.474924	0.379125	0.385577	0.304508	0.423952	0.406459	0.467755	0.558366	0.571718	0.636788	0.656599	0.707724	0.760735	0.684869	0.783316	0.832164	0.800746	0.746369	0.788784	0.717546	0.82316	0.805244	0.711759
			HL	0.329564	0.356046	0.335608	0.428853	0.374518	0.346265	0.296229	0.323814	0.378787	0.341195	0.5492	0.507098	0.442376	0.406462	0.518953	0.330656	0.516291	0.432123	0.438262	0.608668	0.614206	0.574816	0.696549	0.615902	0.771544	0.635733	0.580254	0.557508	0.450051	0.581965	0.491072	0.453717	0.431383	0.528421	0.635271	0.537433	0.719535	0.447946	0.642694	0.442838	0.6931	0.595384	0.667803	0.701585	0.722964	0.504566
			LL	0.24623	0.259193	0.278407	0.283807	0.273971	0.234863	0.274861	0.268795	0.319104	0.325409	0.329641	0.34741	0.409177	0.400792	0.452987	0.438288	0.492164	0.453984	0.46496	0.520037	0.562486	0.553711	0.461326	0.639305	0.743886	0.678238	0.648394	0.648103	0.686372	0.626301	0.752593	0.804104	0.808393	0.870917	1.02154	1.19214	1.3861	1.51311	1.5673	1.60168	1.62097	1.56711	1.55466	1.46138	1.40089	1.39854
		p value (vs. HR)	LL vs. HR	0.60493	0.736539	0.784608	0.690252	0.964974	0.692161	0.718011	0.964866	0.388257	0.989884	0.630086	0.451476	0.300028	0.430651	0.401887	0.826212	0.693553	0.33326	0.823666	0.641829	0.670468	0.31531	0.819209	0.763165	0.429943	0.843246	0.60376	0.639809	0.1965	0.537532	0.802488	0.676973	0.917455	0.783608	0.647161	0.995824	0.834755	0.203589	0.114266	0.153468	0.207451	0.190152	0.369325	0.879569	0.943578	0.767825
			LL vs. LR	0.0133474	0.485236	0.327423	0.283337	0.175347	0.114775	0.0995056	0.234014	0.20474	0.0164219	0.0845708	0.0663029	0.711363	0.156689	0.072465	0.263715	0.0443724	0.277306	0.0795545	0.0517316	0.0929906	0.0553565	0.484753	0.11603	0.175362	0.160697	0.155125	0.80126	0.886713	0.83949	0.634684	0.490625	0.22753	0.92706	0.70088	0.467601	0.239334	0.576724	0.745517	0.27764	0.130112	0.0275067	0.0010227	0.000601867	1.07416e-06	2.51941e-07
			LL vs. HL	0.0284519	0.379021	0.0492357	0.0826077	0.274475	0.0983747	0.165224	0.164631	0.302601	0.036683	0.139409	0.181571	0.380622	0.0420025	0.0398765	0.239348	0.0947977	0.636817	0.0437756	0.00703766	0.286088	0.176164	0.20584	0.464659	0.216277	0.11713	0.0589243	0.430546	0.855051	0.919998	0.696544	0.734673	0.823953	0.577301	0.34198	0.354353	0.109376	0.0502125	0.0442699	0.0312961	0.0127746	0.013033	7.27828e-06	2.24063e-07	8.7276e-07	9.97572e-09
	ROC value at early stage
				Time bin
				1	2	3	4	5	6	7	8	9	10	11	12	13	14	15	16	17	18	19	20	21	22	23	24	25	26	27	28	29	30	31	32	33	34	35	36	37	38	39	40	41	42	43	44	45	46
	Trial types compared Trials compared Trials compired	Mean	LL vs. HR	0.50321	0.486507	0.494833	0.500571	0.50224	0.493073	0.499787	0.497668	0.503365	0.508538	0.502538	0.504064	0.502773	0.510427	0.502965	0.482398	0.471348	0.487084	0.48689	0.492265	0.489963	0.478085	0.487363	0.495447	0.483225	0.488842	0.478509	0.480937	0.491052	0.472741	0.512036	0.505899	0.503691	0.502694	0.513978	0.508047	0.523602	0.503322	0.541496	0.53625	0.512726	0.508032	0.499226	0.512459	0.52072	0.515692
			LL vs. LR	0.509362	0.499846	0.502322	0.511151	0.498307	0.499654	0.507978	0.51289	0.507428	0.509374	0.514578	0.502935	0.504543	0.514979	0.494082	0.487525	0.477791	0.497384	0.508449	0.4926	0.506018	0.500801	0.511171	0.530762	0.551402	0.555387	0.587877	0.616933	0.65731	0.660993	0.684014	0.676284	0.684722	0.68558	0.696015	0.691215	0.682326	0.665629	0.667656	0.665856	0.662836	0.672196	0.660679	0.645221	0.65834	0.646331
			LL vs. HL	0.506201	0.500642	0.499832	0.503364	0.504113	0.498062	0.497732	0.50119	0.511225	0.512571	0.511397	0.507587	0.500721	0.50625	0.495419	0.49314	0.487382	0.491776	0.506188	0.505555	0.511255	0.516399	0.525605	0.546276	0.562035	0.568694	0.592163	0.609096	0.644426	0.660222	0.683206	0.677376	0.679736	0.693391	0.698856	0.695314	0.681854	0.667861	0.669459	0.668641	0.654181	0.672722	0.653259	0.649365	0.661797	0.647354
		s.e.m.	LL vs. HR	0.00664287	0.00644127	0.00696534	0.00209134	0.0116752	0.0122274	0.00776696	0.0128051	0.0163469	0.0118775	0.0153951	0.0184111	0.00918763	0.0115258	0.00498995	0.0113841	0.0181846	0.0157011	0.0231948	0.0196176	0.0148462	0.0102018	0.0115142	0.0117041	0.0159331	0.01706	0.0207841	0.0159563	0.0193699	0.0186734	0.0165977	0.0160103	0.0163516	0.0175255	0.0140726	0.0179123	0.0135406	0.0136779	0.021802	0.0269087	0.0215334	0.0189635	0.0182165	0.0171682	0.0149036	0.0219336
			LL vs. LR	0.00664227	0.0102762	0.00694881	0.00725791	0.00832302	0.0105792	0.011501	0.0138795	0.01313	0.013275	0.0133818	0.0122195	0.0069806	0.00954514	0.00788533	0.0116929	0.0132045	0.0128364	0.0151543	0.0151765	0.00872602	0.0086042	0.0144335	0.0223414	0.0215167	0.0283726	0.0277799	0.0289806	0.030695	0.0304711	0.0345004	0.0339091	0.0355612	0.0419239	0.0391509	0.0387819	0.0398887	0.0405695	0.039301	0.0431716	0.0417674	0.0449119	0.0393883	0.0379067	0.0385475	0.0362474
			LL vs. HL	0.00796344	0.00630475	0.00645467	0.008862	0.00448211	0.00645637	0.00502786	0.00377499	0.00605824	0.00675072	0.00862512	0.00802331	0.013396	0.0116177	0.0110456	0.0108411	0.0117364	0.00867667	0.0124814	0.0145287	0.00902398	0.0128715	0.0174111	0.0266	0.0220733	0.0322428	0.0279676	0.0309877	0.0343033	0.0331741	0.0374487	0.0339648	0.0354309	0.041391	0.0398686	0.0396382	0.0438911	0.0416412	0.0387114	0.0432833	0.0437924	0.0419965	0.0398598	0.0373102	0.0405465	0.0382161
		p value	LL vs. HR	0.672363	0.0195312	0.835449	0.952637	0.96582	0.791016	1	0.824463	1	0.909668	0.263672	0.685547	0.945312	0.734375	0.375	0.0390625	0.359375	0.948242	0.786865	0.469727	0.786865	0.0668945	0.320312	0.583008	0.196108	0.389404	0.351979	0.214525	0.717381	0.379375	0.761536	0.803955	0.761536	1	0.561401	0.638672	0.135254	1	0.0494385	0.541748	0.625732	0.951538	1	0.390991	0.267578	0.463135
			LL vs. LR	0.257324	0.652344	0.458008	0.130859	0.904297	0.894531	1	0.413086	0.87793	0.365234	0.382812	0.625	0.570312	0.25	0.546875	0.578125	0.130859	0.556641	0.236328	0.748779	0.30542	0.892578	0.677246	0.323364	0.0134277	0.0494385	0.00262451	0.00160629	0.000935091	0.000776411	0.000776411	0.000183105	0.000531243	0.00112338	6.10352e-05	6.10352e-05	0.000244141	0.000183105	0.000427246	0.00524902	0.00170898	0.00402832	0.000854492	0.00427246	0.00152588	0.000854492
			LL vs. HL	0.505859	0.224609	0.848633	0.917969	0.476562	0.664551	0.700195	0.761719	0.078125	0.169434	0.332031	0.28125	0.78125	1	0.359375	0.271484	0.452148	0.481995	0.977966	0.598633	0.533997	0.283203	0.338379	0.0905762	0.00115967	0.0255737	0.00152588	0.00378325	0.00378325	0.000935091	0.0013462	0.000305176	0.00112338	0.000305176	0.000641697	0.000643041	0.000610352	0.00115967	0.000305176	0.00244141	0.00854492	0.00128174	0.00244141	0.00262451	0.00354004	0.00183105
	ROC value at middle stage
				Time bin
				1	2	3	4	5	6	7	8	9	10	11	12	13	14	15	16	17	18	19	20	21	22	23	24	25	26	27	28	29	30	31	32	33	34	35	36	37	38	39	40	41	42	43	44	45	46
	Trial types compared Trials compared Trials compired	Mean	LL vs. HR	0.497469	0.500656	0.488298	0.495075	0.482386	0.496117	0.497164	0.505998	0.498226	0.509127	0.509193	0.486379	0.500141	0.504526	0.49875	0.497075	0.501545	0.505348	0.515866	0.522696	0.525746	0.528613	0.55913	0.550769	0.526222	0.518736	0.501904	0.487311	0.471247	0.480019	0.467463	0.490827	0.47734	0.494458	0.505726	0.496371	0.515225	0.505999	0.477476	0.49626	0.478503	0.47084	0.462167	0.485806	0.472708	0.493774
			LL vs. LR	0.488794	0.485289	0.480497	0.487007	0.478916	0.475764	0.494965	0.49545	0.498719	0.491105	0.489137	0.478401	0.504209	0.504219	0.491921	0.488336	0.496421	0.500117	0.512621	0.530453	0.534452	0.560297	0.600997	0.623338	0.639987	0.653349	0.662961	0.654218	0.675428	0.661203	0.655669	0.666506	0.654975	0.656148	0.672007	0.653576	0.656705	0.641818	0.642556	0.656085	0.625185	0.62315	0.624771	0.636913	0.614341	0.626646
			LL vs. HL	0.508526	0.509059	0.511007	0.498987	0.498587	0.507774	0.503158	0.514147	0.502199	0.512384	0.516355	0.51018	0.503734	0.501649	0.506933	0.499359	0.510817	0.50406	0.51925	0.542829	0.548716	0.567605	0.604318	0.611943	0.64251	0.643896	0.660293	0.647337	0.660433	0.655627	0.649257	0.651397	0.631078	0.634131	0.646536	0.633099	0.646598	0.626572	0.62759	0.650552	0.62315	0.617505	0.629725	0.638653	0.611488	0.623323
		s.e.m.	LL vs. HR	0.0117534	0.00987725	0.00816051	0.00969172	0.011328	0.00863622	0.00729168	0.00838092	0.0095329	0.0100774	0.00554042	0.00761012	0.0187498	0.0117855	0.00356447	0.00435756	0.00603804	0.00564139	0.0160171	0.0216343	0.0290578	0.032075	0.0294169	0.032942	0.0262993	0.0157365	0.0109923	0.0160145	0.0263248	0.0250783	0.0247877	0.0245758	0.0308246	0.0262173	0.032843	0.0332716	0.0343146	0.0264119	0.0238661	0.0217145	0.017735	0.0247277	0.0183456	0.017646	0.015338	0.023119
			LL vs. LR	0.00701803	0.00600359	0.00619598	0.00602841	0.00698603	0.0199442	0.00593888	0.0127344	0.0123254	0.0143671	0.00976901	0.010898	0.0185933	0.00796409	0.00453696	0.0053038	0.00667136	0.00784747	0.0179333	0.0229281	0.0328088	0.0406793	0.0366848	0.0373316	0.0409247	0.0445791	0.0468361	0.0491791	0.0461431	0.0507212	0.0528478	0.0516794	0.051895	0.0493367	0.046414	0.0499521	0.0515334	0.0505715	0.0517626	0.0494041	0.0458797	0.0426301	0.0473233	0.0440116	0.0460601	0.0462751
			LL vs. HL	0.00800157	0.00898122	0.00526768	0.00541596	0.0116401	0.00690028	0.0107852	0.0125974	0.0134131	0.00953884	0.0112555	0.0095055	0.00355995	0.00798158	0.00677916	0.00469899	0.00430954	0.0109348	0.015987	0.0235094	0.0296206	0.0368499	0.0332963	0.0390743	0.0428719	0.0443076	0.045293	0.0490557	0.0491753	0.0510416	0.0595704	0.0519695	0.0541558	0.0486074	0.0546777	0.0542899	0.0563736	0.0582541	0.05665	0.0485946	0.0480632	0.0428072	0.0476292	0.0437762	0.0443087	0.0432151
		p value	LL vs. HR	0.359375	1	0.25	1	0.164062	0.945312	0.625	0.652344	1	0.652344	0.21875	0.148438	0.8125	0.945312	0.84375	0.820312	0.46875	0.480469	0.5625	0.546875	0.96582	0.948242	0.0322266	0.123047	0.519531	0.275391	0.577148	0.464844	0.637695	0.898438	0.464844	0.637695	0.365234	0.764648	0.492188	0.695312	0.519531	0.577148	0.577148	0.898438	0.320312	0.365234	0.0830078	0.464844	0.0673828	0.96582
			LL vs. LR	0.206055	0.0195312	0.00976562	0.0742188	0.0195312	0.148438	0.757812	0.976562	0.734375	0.607422	0.460938	0.0742188	0.695312	1	0.101562	0.0644531	0.382812	0.820312	0.603516	0.166992	0.496094	0.203125	0.000976562	0.000976562	0.000976562	0.00195312	0.000976562	0.00683594	0.000976562	0.00683594	0.0136719	0.00488281	0.00976562	0.0136719	0.00195312	0.00390625	0.00292969	0.0195312	0.0195312	0.000976562	0.00488281	0.00195312	0.0136719	0.00195312	0.00585938	0.00488281
			LL vs. HL	0.496094	0.46875	0.078125	0.8125	0.8125	0.382812	0.734375	0.492188	0.496094	0.382812	0.25	0.460938	0.375	0.8125	0.382812	0.886719	0.03125	0.578125	0.375	0.03125	0.0546875	0.0195312	0.000976562	0.00683594	0.00195312	0.0078125	0.00195312	0.00488281	0.000976562	0.00292969	0.0185547	0.00195312	0.0839844	0.00683594	0.0244141	0.0195312	0.0244141	0.0488281	0.0644531	0.00195312	0.0126953	0.00683594	0.00292969	0.00488281	0.0195312	0.000976562
	ROC value at late stage
				Time bin
				1	2	3	4	5	6	7	8	9	10	11	12	13	14	15	16	17	18	19	20	21	22	23	24	25	26	27	28	29	30	31	32	33	34	35	36	37	38	39	40	41	42	43	44	45	46
	Trial types compared Trials compared Trials compired	Mean	LL vs. HR	0.500899	0.505047	0.498879	0.502999	0.508051	0.501362	0.50269	0.504138	0.498881	0.507032	0.503026	0.509829	0.518664	0.518163	0.505166	0.50922	0.505212	0.50662	0.505397	0.484658	0.478114	0.490903	0.514791	0.516793	0.514638	0.489616	0.495741	0.504324	0.508718	0.507435	0.513519	0.519224	0.521589	0.516707	0.51235	0.504922	0.50993	0.500097	0.507218	0.506824	0.502868	0.506821	0.509295	0.501496	0.505286	0.500713
			LL vs. LR	0.498079	0.500022	0.497255	0.505371	0.504955	0.508943	0.501157	0.501819	0.509384	0.50612	0.505042	0.497696	0.510751	0.508824	0.493555	0.499961	0.497539	0.512873	0.51781	0.517041	0.535695	0.55522	0.583295	0.590693	0.583279	0.572539	0.560935	0.558375	0.565235	0.56096	0.570105	0.569658	0.577013	0.562048	0.565653	0.567493	0.568285	0.568738	0.570959	0.568393	0.56947	0.57256	0.57562	0.567157	0.577224	0.571769
			LL vs. HL	0.472072	0.485406	0.479598	0.487514	0.48173	0.476099	0.501894	0.497759	0.492937	0.502049	0.484014	0.493037	0.502772	0.500917	0.484392	0.492041	0.502177	0.501592	0.522392	0.540317	0.538376	0.578956	0.589471	0.588747	0.57181	0.561798	0.555027	0.559855	0.558303	0.556323	0.556006	0.569749	0.573774	0.565802	0.561781	0.56211	0.577008	0.558723	0.573627	0.563985	0.571782	0.573094	0.570742	0.570403	0.574568	0.573117
		s.e.m.	LL vs. HR	0.00354819	0.00439067	0.00368193	0.0046072	0.00532267	0.00608158	0.00583079	0.00582897	0.00645908	0.00687508	0.00672324	0.00717808	0.00842125	0.00846468	0.00832664	0.00859523	0.00894224	0.00836935	0.0128421	0.0146287	0.0160835	0.0127275	0.0112717	0.0112677	0.0118634	0.0110166	0.0112049	0.011481	0.00977064	0.00780862	0.00736501	0.00617228	0.0061419	0.00530297	0.00640166	0.00590488	0.00594484	0.00603776	0.00709429	0.00663583	0.00653483	0.00629342	0.00713242	0.00640122	0.0068262	0.00665168
			LL vs. LR	0.00388334	0.00547111	0.00444567	0.00494529	0.00616117	0.0054747	0.00552735	0.00603499	0.00736727	0.0064826	0.00696229	0.00822224	0.00847094	0.0110234	0.0137557	0.0134814	0.0149915	0.0135858	0.0155505	0.0156327	0.016742	0.0159836	0.0170572	0.0171671	0.0170626	0.0158082	0.01742	0.0174904	0.0162315	0.0153135	0.0156894	0.0150726	0.0158953	0.0159376	0.0145446	0.0144468	0.0141601	0.0142058	0.0146614	0.0149002	0.013716	0.014021	0.0148793	0.0146866	0.0145311	0.0138639
			LL vs. HL	0.0143455	0.0124512	0.0122957	0.0108403	0.0124901	0.0125217	0.00819468	0.00766042	0.00840878	0.00975488	0.0107594	0.00910935	0.00857465	0.010589	0.0136259	0.0143328	0.0131153	0.0154106	0.0161965	0.0163887	0.0188154	0.018524	0.0186895	0.0184822	0.0184873	0.0183765	0.0182486	0.0194311	0.01771	0.0184312	0.0192971	0.0155343	0.0175726	0.018014	0.0175797	0.0166557	0.0157566	0.0152799	0.0137621	0.0164612	0.0137073	0.0139088	0.0174213	0.0146578	0.0138318	0.0139858
		p value	LL vs. HR	0.975063	0.714361	0.378593	0.90867	0.396003	0.448408	0.441904	0.717151	0.0878066	0.801879	0.925615	0.202146	0.021765	0.150331	0.261785	0.224327	0.592213	0.761836	0.48039	0.0345279	0.0297521	0.208843	0.638928	0.26513	0.153819	0.443252	0.901988	0.747618	0.352419	0.180607	0.0281507	0.00563672	0.00134765	0.00200406	0.046903	0.107372	0.097425	0.807655	0.417641	0.343506	0.337022	0.303431	0.0852067	0.703442	0.869791	0.770727
			LL vs. LR	0.923037	0.545908	0.648988	0.192785	0.682011	0.031968	0.690803	0.459614	0.0825047	0.222531	0.476478	0.800497	0.372495	0.350753	0.168825	0.491183	0.227615	0.803867	0.988093	0.932962	0.0439863	0.00016062	1.79443e-07	6.27258e-08	3.20282e-07	3.38602e-07	3.68191e-05	4.29431e-05	2.90976e-05	0.000268402	7.91816e-06	5.95915e-05	4.63859e-06	0.000452235	0.000126147	3.99582e-05	1.411e-05	1.51657e-05	1.72165e-05	0.000118025	7.24189e-06	4.52971e-06	2.3421e-05	8.67372e-05	3.46846e-06	7.52481e-06
			LL vs. HL	0.299027	0.932634	0.824512	0.936422	0.978208	0.693629	0.131464	0.203124	0.937385	0.0451455	0.682908	0.827922	0.0533682	0.0472383	0.492769	0.335541	0.560892	0.966598	0.0771364	0.0167225	0.0132452	2.8164e-06	1.79458e-07	8.70338e-08	2.16829e-06	4.45763e-06	1.86565e-05	2.36632e-05	7.71105e-05	9.84822e-05	0.000477398	5.93134e-06	1.94889e-05	8.7827e-05	1.35409e-05	4.49818e-05	2.39619e-07	0.000621761	4.31991e-07	7.72409e-05	2.92769e-06	2.77461e-06	8.52303e-06	7.22972e-06	2.23022e-06	3.59712e-06
	Licking rate at early stage
				Time bin
				1	2	3	4	5	6	7	8	9	10	11	12	13	14	15	16	17	18	19	20	21	22	23	24	25	26	27	28	29	30	31	32	33	34	35	36	37	38	39	40	41	42	43	44	45	46
	Trial type	Mean	HR	0.0806452	0.16129	0.16129	0.0568182	0.0806452	0	0.0744238	0.0920294	0	0	0.0806452	0.0806452	0	0	0	0	0.0806452	0	0	0	0	0	0	0	0	0	0	0	0	0	0	0.0721154	0	0	0	0	0.233406	0.16129	0.691687	0.776949	2.31146	2.44917	1.55561	2.04133	2.87382	3.64535
			LR	0	0.0192308	0	0	0	0.0694444	0	0.0806452	0	0.0806452	0.15009	0.0694444	0.0806452	0	0.0806452	0	0	0	0	0	0	0	0	0	0	0	0	0	0	0	0	0	0	0	0	0.0806452	0.0806452	0.0806452	0.261166	0.322581	0.51861	0.960298	0.495658	0.476427	0.860422	0.633995
			HL	0	0	0.0208333	0	0.185185	0	0	0	0	0	0	0	0	0	0	0	0	0	0	0	0	0	0	0	0	0	0	0	0	0	0	0	0	0	0	0	0.740741	1.11111	0.37037	0.37037	0.810185	0.555556	0.694444	0.393519	0.439815	1.38889
			LL	0	0	0.185185	0	0.185185	0.185185	0.185185	0	0	0	0	0	0.185185	0	0	0	0	0	0	0	0	0	0	0	0	0	0	0	0	0	0	0	0	0.185185	0	0.555556	0.925926	0.37037	1.70343	0.333422	1.5917	1.31855	1.62783	2.82858	3.02401	3.11239
		s.e.m.	HR	0.0360656	0.0721312	0.0721312	0.0568182	0.0360656	0	0.0583514	0.0648181	0	0	0.0360656	0.0360656	0	0	0	0	0.0360656	0	0	0	0	0	0	0	0	0	0	0	0	0	0	0.0387609	0	0	0	0	0.0717945	0.0721312	0.202603	0.211387	0.632863	0.267816	0.377266	0.512677	0.436489	0.487246
			LR	0	0.0192308	0	0	0	0.0694444	0	0.0360656	0	0.0360656	0.0733249	0.0694444	0.0360656	0	0.0360656	0	0	0	0	0	0	0	0	0	0	0	0	0	0	0	0	0	0	0	0	0.0360656	0.0360656	0.0360656	0.107033	0.144262	0.199069	0.370404	0.208142	0.194585	0.332345	0.270861
			HL	0	0	0.0208333	0	0.0828173	0	0	0	0	0	0	0	0	0	0	0	0	0	0	0	0	0	0	0	0	0	0	0	0	0	0	0	0	0	0	0	0.331269	0.496904	0.165635	0.165635	0.328182	0.248452	0.265952	0.212409	0.169788	0.531904
			LL	0	0	0.0828173	0	0.0828173	0.0828173	0.0828173	0	0	0	0	0	0.0828173	0	0	0	0	0	0	0	0	0	0	0	0	0	0	0	0	0	0	0	0	0.0828173	0	0.248452	0.414087	0.165635	0.740768	0.088963	0.427086	0.392273	0.395401	0.527812	0.78886	0.47026
	Licking rate at middle stage
				Time bin
				1	2	3	4	5	6	7	8	9	10	11	12	13	14	15	16	17	18	19	20	21	22	23	24	25	26	27	28	29	30	31	32	33	34	35	36	37	38	39	40	41	42	43	44	45	46
	Trial type	Mean	HR	0.0371058	0.0371058	0	0.111317	0	0.0371058	0	0.121437	0	0	0	0	0	0	0	0.0742115	0	0	0	0	0	0	0	0	0	0	0	0	0	0	0	0	0	0.0742115	0.18383	0.565166	1.03302	2.12333	2.19091	3.24314	3.8776	3.22761	4.3531	5.79106	5.07601	6.57502
			LR	0	0	0	0.118577	0	0	0	0	0	0	0	0	0	0	0	0	0	0	0	0	0	0	0	0	0	0	0	0	0	0	0	0	0	0	0	0	0	0	0	0	0	0.0577201	0.11544	0.296567	0.17316	0.337637
			HL	0.0956938	0	0.0478469	0	0	0	0	0	0	0	0	0	0	0	0	0	0	0	0	0	0	0	0	0	0	0	0	0	0	0	0	0	0	0	0	0	0.0956938	0.0478469	0.0956938	0.0478469	0	0.0956938	0.0956938	0.0956938	0.287081	0.516746
			LL	0	0.0275482	0	0	0	0	0	0	0	0	0	0	0	0.0550964	0	0	0	0	0	0	0	0	0	0	0	0	0	0	0	0	0	0	0	0	0	0.0826446	0.165289	0.384341	0.720358	1.22463	2.38835	4.69461	3.47651	3.97841	4.88605	5.36051
		s.e.m.	HR	0.0371058	0.0371058	0	0.111317	0	0.0371058	0	0.0762235	0	0	0	0	0	0	0	0.0742115	0	0	0	0	0	0	0	0	0	0	0	0	0	0	0	0	0	0.0742115	0.0537513	0.24095	0.462634	0.864654	0.851806	1.27308	1.49914	0.943869	0.972303	1.30153	1.15588	1.35486
			LR	0	0	0	0.0612329	0	0	0	0	0	0	0	0	0	0	0	0	0	0	0	0	0	0	0	0	0	0	0	0	0	0	0	0	0	0	0	0	0	0	0	0	0	0.0387198	0.0774396	0.100973	0.116159	0.124903
			HL	0.0956938	0	0.0478469	0	0	0	0	0	0	0	0	0	0	0	0	0	0	0	0	0	0	0	0	0	0	0	0	0	0	0	0	0	0	0	0	0	0.0956938	0.0478469	0.0956938	0.0478469	0	0.0956938	0.0956938	0.0956938	0.287081	0.33893
			LL	0	0.0275482	0	0	0	0	0	0	0	0	0	0	0	0.0550964	0	0	0	0	0	0	0	0	0	0	0	0	0	0	0	0	0	0	0	0	0	0.0826446	0.165289	0.214638	0.163332	0.389121	0.317022	0.782578	0.704341	0.726054	0.596823	1.06702
	Licking rate at late stage
				Time bin
				1	2	3	4	5	6	7	8	9	10	11	12	13	14	15	16	17	18	19	20	21	22	23	24	25	26	27	28	29	30	31	32	33	34	35	36	37	38	39	40	41	42	43	44	45	46
	Trial type	Mean	HR	0.0109469	0.0453515	0	0.00547345	0	0	0	0	0	0.0226757	0	0	0	0	0	0	0	0	0	0	0	0	0	0	0	0	0	0	0	0	0	0	0	0	0.0226757	0.448038	0.973263	1.72201	3.39112	4.44304	5.472	5.28818	7.4787	7.64851	7.5452	8.2994
			LR	0.042328	0.133668	0	0	0.021164	0.021164	0	0	0	0	0	0.021164	0	0.133668	0.133668	0	0	0	0	0	0	0	0	0	0	0	0	0	0	0	0	0	0	0	0	0	0	0.136054	0.246914	0	0	0.0453515	0.246914	0.464466	0.292265	0.413202
			HL	0.0145959	0.0145959	0.0145959	0.0145959	0.0145959	0.0145959	0.0145959	0.0145959	0.0145959	0.0145959	0.0145959	0.0145959	0.0145959	0.0145959	0.0145959	0.0145959	0.0263537	0.0145959	0.0145959	0.0145959	0.0145959	0.0145959	0.0145959	0.0145959	0.0145959	0.0145959	0.0145959	0.0145959	0.0145959	0.0145959	0.0145959	0.0145959	0.0145959	0.0145959	0.0145959	0.0145959	0.0145959	0.0145959	0.0145959	0.0145959	0.0145959	0.0145959	0.0145959	0.522532	0.0145959	0.173326
			LL	0.0622252	0.02442	0.0357702	0.02442	0.02442	0.0293945	0	0	0	0.0601902	0.02442	0	0.02442	0.02442	0.0357702	0.02442	0	0.0288292	0	0	0	0	0	0	0	0	0	0	0	0	0	0	0	0	0.115135	0.17908	0.502628	1.67041	1.97845	3.32024	3.8883	5.50468	5.09208	6.67515	6.69143	6.86975
		s.e.m.	HR	0.0109469	0.0196166	0	0.00547345	0	0	0	0	0	0.00887621	0	0	0	0	0	0	0	0	0	0	0	0	0	0	0	0	0	0	0	0	0	0	0	0	0.00980832	0.0850108	0.150159	0.199882	0.364994	0.496628	0.46933	0.314386	0.474023	0.390961	0.415778	0.40796
			LR	0.042328	0.0445109	0	0	0.021164	0.021164	0	0	0	0	0	0.021164	0	0.0445109	0.0445109	0	0	0	0	0	0	0	0	0	0	0	0	0	0	0	0	0	0	0	0	0	0	0.0532572	0.0586656	0	0	0.0196166	0.0586656	0.0719553	0.0588663	0.121831
			HL	0.00571342	0.00571342	0.00571342	0.00571342	0.00571342	0.00571342	0.00571342	0.00571342	0.00571342	0.00571342	0.00571342	0.00571342	0.00571342	0.00571342	0.00571342	0.00571342	0.012859	0.00571342	0.00571342	0.00571342	0.00571342	0.00571342	0.00571342	0.00571342	0.00571342	0.00571342	0.00571342	0.00571342	0.00571342	0.00571342	0.00571342	0.00571342	0.00571342	0.00571342	0.00571342	0.00571342	0.00571342	0.00571342	0.00571342	0.00571342	0.00571342	0.00571342	0.00571342	0.16853	0.00571342	0.0771488
			LL	0.0147849	0.00955899	0.0119114	0.00955899	0.00955899	0.0127145	0	0	0	0.0143205	0.00955899	0	0.00955899	0.00955899	0.0119114	0.00955899	0	0.0103606	0	0	0	0	0	0	0	0	0	0	0	0	0	0	0	0	0.031866	0.0478341	0.0915963	0.188325	0.196313	0.307739	0.267233	0.319466	0.326308	0.343489	0.326228	0.232676
[truncated: 94 more columns]

## Sheet: Figure 6–figure supplement 2B
Figure 6–figure supplement 2B	Data	Averaged firing rate for 5 s after the FL in the LL trial of pVLS neurons
	Softwear	matlab ver 2019
	Group	Number of FL-LL neurons in the pVLS; 16, 11, and 63 neurons for early, middle, and late stages, respectively.
	Dependent variable	Firing rate (Hz)
	Stats	Kruskalwallis test; LL trial, χ2 = 2.326788158931017, p = 0.312423987477449
			Firing rate
	Learning stage	early	0.247059
		early	5.87246
		early	1.02963
		early	5.55556
		early	4.35556
		early	2.12593
		early	1.5493
		early	7.19718
		early	12.2761
		early	5.08451
		early	18.231
		early	0.0873239
		early	32.8359
		early	8.87179
		early	1.73333
		early	14.3583
		middle	3.16667
		middle	8.98776
		middle	0.669697
		middle	0.905556
		middle	13.8093
		middle	0.609302
		middle	0.209302
		middle	13.6462
		middle	4.59231
		middle	11.4792
		middle	2.6125
		late	2.78072
		late	2.90361
		late	0.276712
		late	2.62222
		late	6.20526
		late	11.7506
		late	3.88611
		late	6.92778
		late	7.54444
		late	5.73611
		late	4.54167
		late	0.258333
		late	2.33803
		late	5.31549
		late	8.31268
		late	3.47042
		late	0.0732394
		late	0.346479
		late	1.0169
		late	5.84789
		late	2.8
		late	5.93077
		late	9.57949
		late	2.94615
		late	0.653846
		late	0.0897436
		late	6.01111
		late	5.95926
		late	6.01852
		late	3.44815
		late	2.43333
		late	4.30882
		late	3.81765
		late	1.28529
		late	2.75882
		late	0.970588
		late	12.65
		late	0.829412
		late	1.04118
		late	0.861972
		late	2.15211
		late	4.54085
		late	5.91549
		late	1.21972
		late	1.08451
		late	0.647887
		late	8.1662
		late	3.61127
		late	5.32113
		late	2.74085
		late	0.619718
		late	0.814085
		late	11.6592
		late	0.616216
		late	2.65135
		late	0.202703
		late	1.1
		late	8.06486
		late	1.72973
		late	3.99481
		late	0.662338
		late	1.74805
		late	6.27273

## Sheet: Figure 6–figure supplement 2C
Figure 6–figure supplement 2C	Data	Averaged total number of time bins above 3 S.D. of the baseline firing for 5 s after the FL in the LL trial of pVLS neurons
	Softwear	matlab ver 2019
	Group	Number of FL-LL neurons in the pVLS; 16, 11, and 63 neurons for early, middle, and late stages, respectively.
	Dependent variable	Number of bin
	Stats	Kruskalwallis test; LL trial, χ2 = 4.736359548812393, p = 0.093651037243723
			Total number of time bins
	Learning stage	early	5
		early	0
		early	21
		early	62
		early	79
		early	23
		early	10
		early	88
		early	86
		early	88
		early	57
		early	100
		early	0
		early	56
		early	41
		early	46
		middle	62
		middle	26
		middle	0
		middle	3
		middle	94
		middle	4
		middle	100
		middle	67
		middle	1
		middle	79
		middle	41
		late	7
		late	35
		late	4
		late	1
		late	0
		late	0
		late	97
		late	14
		late	10
		late	13
		late	34
		late	1
		late	3
		late	51
		late	99
		late	11
		late	7
		late	1
		late	8
		late	12
		late	3
		late	73
		late	97
		late	7
		late	2
		late	4
		late	29
		late	77
		late	65
		late	23
		late	1
		late	21
		late	55
		late	3
		late	23
		late	13
		late	48
		late	15
		late	1
		late	7
		late	100
		late	32
		late	33
		late	0
		late	26
		late	15
		late	53
		late	26
		late	68
		late	16
		late	15
		late	32
		late	93
		late	0
		late	56
		late	3
		late	5
		late	74
		late	12
		late	0
		late	1
		late	32
		late	2

## Sheet: Figure 6–figure supplement 2D
Figure 6–figure supplement 2D	Data	Cumulative probability of the proportion of FL-LL neuron number in the pVLS at the early, middle, and late stages
	Softwear	matlab ver 2019
	Group	Number of FL-LL neurons in the pVLS; 16, 11, and 63 neurons for early, middle, and late stages, respectively.
	Dependent variable	Calculated number of event-related neurons
	Stats	Kruskalwallis test; χ2 = 51.215073519114980, p = 0.0000000000075646369577855 post hoc Tukey–Kramer test; early vs. middle; p = 0.001951501520814 early vs. late; p = 0.000510493137519829 middle vs. late; p = 0.0000000009583972504501040
			Cumulative probability of the proportion
	Learning stage	early	9.58904
		early	10.9589
		early	12.3288
		early	12.3288
		early	8.21918
		early	10.9589
		early	8.21918
		early	10.9589
		early	12.3288
		early	10.9589
		early	9.58904
		early	9.58904
		early	10.9589
		early	12.3288
		early	8.21918
		early	10.9589
		early	10.9589
		early	10.9589
		early	13.6986
		early	9.58904
		middle	8.18182
		middle	6.36364
		middle	8.18182
		middle	6.36364
		middle	7.27273
		middle	8.18182
		middle	7.27273
		middle	8.18182
		middle	9.09091
		middle	7.27273
		middle	7.27273
		middle	10
		middle	9.09091
		middle	8.18182
		middle	8.18182
		middle	7.27273
		middle	7.27273
		middle	7.27273
		middle	7.27273
		middle	7.27273
		late	25.2632
		late	24.2105
		late	24.7368
		late	25.2632
		late	23.6842
		late	23.1579
		late	24.7368
		late	26.3158
		late	23.6842
		late	26.3158
		late	23.1579
		late	24.7368
		late	24.2105
		late	26.3158
		late	25.7895
		late	25.7895
		late	22.6316
		late	22.6316
		late	22.6316
		late	25.7895

## Sheet: Figure 6–figure supplement 2E
Figure 6–figure supplement 2E	Data	Distribution of the correlation coefficient between the numbers of spikes of pVLS FL-LL neurons and licking
	Softwear	matlab ver 2019
	Group	Number of FL-LL neurons in the pVLS; 16, 11, and 63 neurons for early, middle, and late stages, respectively.
	Dependent variable
	Stats	Pearson's linear correlation coefficient;
			r	p value
	# of neurons	1	NaN	NaN
		2	-0.129617	0.444509
		3	-0.0542742	0.711096
		4	0.217663	0.0480753
		5	-0.10721	0.35338
		6	-0.280436	0.0346059
		7	0.0702988	0.616935
		8	0.0715008	0.559336
		9	0.0475655	0.683255
		10	-0.100733	0.417315
		11	-0.395599	0.129341
		12	0.259304	0.221114
		13	-0.533076	0.0496617
		14	0.198355	0.341863
		15	0.255535	0.12689
		16	0.247014	0.0509727
		17	-0.0819972	0.519488
		18	0.209263	0.0970081
		19	-0.0602621	0.636195
		20	0.377807	0.0022679
		21	0.0981441	0.626245
		22	-0.156487	0.224517
		23	0.000202033	0.998757
		24	-0.066053	0.64857
		25	0.116404	0.367597
		26	-0.503023	0.0667327
		27	-0.151527	0.350637
		28	0.17065	0.404567
		29	0.165326	0.199092
		30	0.196617	0.0954716
		31	0.159295	0.181367
		32	-0.206222	0.11082
		33	0.231345	0.0505496
		34	-0.0999655	0.480743
		35	0.085685	0.719458
		36	0.0720359	0.650299
		37	-0.126048	0.30206
		38	-0.0156545	0.897655
		39	-0.00775348	0.949207
		40	0.14544	0.226204
		41	-0.350096	0.21978
		42	0.186928	0.25451
		43	0.166778	0.33096
		44	-0.240661	0.217342
		45	0.30352	0.116379
		46	-0.0142066	0.936441
		47	0.0107089	0.962275
		48	-0.0293105	0.940332
		49	0.188105	0.232888
		50	-0.633579	0.00117158
		51	-0.0900715	0.661691
		52	-0.268813	0.0934947
		53	0.395053	0.007237
		54	-0.139282	0.593935
		55	0.166071	0.249065
		56	-0.0217003	0.876229
		57	0.0804043	0.521024
		58	-0.0257792	0.843664
		59	-0.0126083	0.923828
		60	0.124344	0.415748
		61	-0.0343828	0.831006
		62	-0.0200669	0.914672
		63	0.122227	0.690786
		64	0.134249	0.513214
		65	-0.0365168	0.762397
		66	0.226976	0.0647319
		67	0.205678	0.131946
		68	-0.11454	0.621039
		69	-0.0164475	0.894902
		70	-0.00797225	0.948163
		71	0.0677492	0.619807
		72	0.00649683	0.957117
		73	-0.31815	0.0110513
		74	-0.024809	0.852043
		75	0.0246107	0.849411
		76	-0.43027	0.0358419
		77	0.403725	0.0408198
		78	0.274107	0.175399
		79	-0.0723054	0.625279
		80	-0.102673	0.497142
		81	-0.230458	0.132319
		82	-0.0856734	0.477462
		83	-0.312702	0.119861
		84	-0.130344	0.296879
		85	0.336293	0.0036267
		86	0.0247119	0.853911
		87	0.26764	0.0285519
		88	0.359585	0.00701059
		89	0.157974	0.220088
		90	0.248066	0.0356379
