# Supplementary material for: Acquisition of auditory discrimination mediated by different processes through two distinct circuits linked to the lateral striatum
Source: eLife. 2025 Jul 11;13:RP97326. doi: 10.7554/eLife.97326 (PMC12252547; doi:10.7554/eLife.97326)
Supplement: Figure 6—source data 1. [file elife-97326-fig6-data1.xlsx]

## Sheet: Fig. 6A
Fig. 6A	Data	Firing rate, auROC and licking rate after the reward outcome of FL-HR neurons in the aDLS at the early, middle, and late stages.
	Group	Number of FL-HR neurons in the aDLS; 27, 31, and 49 neurons for early, middle, and late stages, respectively.
	Softwear	matlab ver 2019
	Stats
	Firing rate at early stage
				Time bin
				1	2	3	4	5	6	7	8	9	10	11	12	13	14	15	16	17	18	19	20	21	22	23	24	25	26	27	28	29	30	31	32	33	34	35	36	37	38	39	40	41	42	43	44	45	46
	Trial type	Mean	HR	1.40495	1.24671	1.3237	1.43077	1.55758	1.36089	1.04847	1.44342	1.33332	1.39869	1.29598	1.38244	0.976229	1.35346	1.25369	1.35465	1.27378	1.65297	1.27649	1.20726	1.12069	1.52625	1.68716	1.33364	1.29003	1.16924	1.16613	0.82754	0.902847	1.20112	1.00039	1.0763	0.983969	1.05591	1.82495	2.21439	2.01145	2.50028	2.85281	2.50563	2.96424	2.85468	3.05516	3.08041	3.08235	3.30563
			LR	1.27834	1.67283	1.27142	1.62033	1.34024	1.57316	1.1127	1.32392	1.4679	1.3505	1.69224	1.58556	1.44261	1.28149	1.37676	1.60453	1.45823	1.21959	1.73816	1.75793	1.25885	1.30273	1.34535	2.12239	1.76212	1.32572	0.703833	0.800972	1.03288	1.01347	1.23711	1.16387	1.1709	1.14421	0.95094	1.0002	1.09317	1.11285	1.04559	1.03549	1.10397	1.08428	1.08235	1.20943	1.1837	0.684675
			HL	1.75339	1.88559	1.99013	1.95774	2.15036	2.17376	1.75513	1.97701	2.22555	2.49923	2.5041	2.41629	2.53332	2.47076	3.07191	2.71529	3.0969	3.13326	3.77223	4.01956	3.94023	4.16102	4.33629	5.56068	5.27196	4.03758	2.47222	1.51921	0.932497	0.717093	0.5279	0.560613	0.554453	0.417312	0.482149	0.796902	0.939554	1.00648	1.02022	0.779228	0.969491	0.82273	0.996817	0.993826	1.05418	0.835254
			LL	2.30157	2.41168	2.28017	2.40144	2.49298	2.47732	2.62001	2.84435	2.6179	2.73784	2.84895	2.90313	3.60167	3.53251	3.60209	3.74278	3.7619	4.06848	4.55155	4.46163	4.72207	5.39923	5.75488	6.24254	6.17076	5.37097	3.51104	2.28607	1.30782	1.55881	1.67291	1.88803	1.65738	1.71361	1.6198	1.92913	1.29037	1.66516	1.45165	1.57409	1.85751	1.47991	1.95762	2.02059	1.91657	1.98013
		s.e.m.	HR	0.305792	0.272534	0.302639	0.290245	0.341829	0.251011	0.234589	0.330326	0.287015	0.336384	0.269855	0.343825	0.229645	0.346586	0.382094	0.403119	0.41633	0.559493	0.479847	0.380552	0.377792	0.459399	0.519188	0.547839	0.3602	0.311102	0.289959	0.255557	0.297699	0.37036	0.347667	0.378084	0.267303	0.330526	0.582401	0.772536	0.764881	1.00539	1.11104	0.926869	1.15379	0.892421	0.965675	0.833354	0.775071	0.657403
			LR	0.314366	0.392904	0.349424	0.423847	0.40642	0.476275	0.33938	0.42756	0.405497	0.33891	0.432243	0.391297	0.376492	0.344298	0.293656	0.32459	0.416343	0.345854	0.475749	0.483982	0.379339	0.440442	0.470793	0.735637	0.578057	0.570511	0.204422	0.246268	0.309069	0.32676	0.46051	0.441627	0.384487	0.412837	0.269513	0.296327	0.358543	0.309418	0.28524	0.325937	0.316317	0.279702	0.244032	0.390866	0.367239	0.138199
			HL	0.388063	0.363709	0.451341	0.414965	0.452568	0.463109	0.449126	0.486894	0.565585	0.592108	0.591197	0.630224	0.656907	0.734448	0.840466	0.839883	1.00157	1.08715	1.24467	1.42718	1.40559	1.6967	2.00721	2.85451	2.68276	1.95264	1.13156	0.579049	0.305088	0.161592	0.122241	0.150286	0.161115	0.104526	0.126226	0.239888	0.28137	0.291747	0.308264	0.223984	0.322458	0.195099	0.260343	0.219599	0.230431	0.191849
			LL	0.651081	0.640096	0.602755	0.639274	0.636675	0.627392	0.77166	0.869833	0.711684	0.813677	0.975	0.987206	1.13958	1.33558	1.40758	1.57054	1.67485	1.67145	1.78743	1.87071	2.08718	2.3142	2.84477	3.32967	3.34017	2.85527	1.65167	0.88955	0.43719	0.483018	0.638494	0.79657	0.691414	0.716466	0.735913	0.75234	0.501064	0.478079	0.482258	0.529523	0.489283	0.376116	0.514061	0.511591	0.455739	0.557165
		p value (vs. HR)	HR vs. LR	0.961157	0.201347	0.831382	0.715127	0.26256	0.407323	0.767607	0.48517	0.505673	0.780901	0.501591	0.128279	0.0339743	0.354762	0.306465	0.180812	0.689368	0.411424	0.0829442	0.130516	0.807612	0.192367	0.148509	0.0370134	0.355959	0.641604	0.035157	0.903198	0.209675	0.614909	0.286186	0.794558	0.355959	0.601149	0.277241	0.350656	0.848395	0.627446	0.306401	0.0533801	0.120863	0.0680006	0.106943	0.100506	0.0129292	0.000331994
			HR vs. HL	0.542985	0.0261455	0.148536	0.241403	0.0974735	0.100506	0.0792955	0.247749	0.100506	0.0446838	0.0945281	0.0673307	0.00896241	0.35701	0.0673546	0.167623	0.106044	0.520182	0.0731381	0.0424703	0.032107	0.179296	0.684855	0.130545	0.227385	0.123929	0.681296	0.351979	0.586136	0.433048	0.433048	0.183959	0.136458	0.147375	0.0297745	0.184181	0.277192	0.22373	0.122846	0.100506	0.081343	0.0764895	0.122865	0.0264242	0.015287	0.000363626
			HR vs. LL	0.338132	0.0593317	0.0853173	0.391366	0.223398	0.199705	0.00317985	0.0392359	0.0431029	0.0208117	0.198398	0.144309	0.0170223	0.223429	0.35701	0.360333	0.262722	0.627416	0.0365613	0.384807	0.00889696	0.0977507	0.52015	0.131132	0.306103	0.197833	0.493901	0.144582	0.354621	0.916946	0.940471	0.637796	0.390368	0.809185	0.687374	0.832866	0.278881	0.807758	0.18381	0.337943	0.572026	0.572026	0.548486	0.56291	0.26415	0.0987518
	Firing rate at middle stage
				Time bin
				1	2	3	4	5	6	7	8	9	10	11	12	13	14	15	16	17	18	19	20	21	22	23	24	25	26	27	28	29	30	31	32	33	34	35	36	37	38	39	40	41	42	43	44	45	46
	Trial type	Mean	HR	1.66233	1.47081	1.56739	1.53532	1.46253	1.54993	1.43437	1.64206	1.47301	1.49688	1.58202	1.45165	1.48588	1.41131	1.5637	1.48958	1.87512	1.689	1.77667	1.78469	1.88163	1.87953	1.71418	2.01718	2.13534	1.85123	1.91093	1.54456	1.59481	1.7086	1.50433	2.1247	1.89519	2.54197	2.97516	2.84394	3.23316	3.68755	4.04196	4.49885	4.85795	4.90275	5.48716	5.1738	5.32437	5.14719
			LR	1.24096	1.61633	1.38607	1.6533	1.74304	1.71126	1.69722	1.74579	1.91674	1.83204	2.02926	1.38199	1.54251	1.96025	1.79547	1.73997	1.63302	1.51989	1.62738	1.64374	1.78265	1.65404	1.36931	1.87701	1.76507	1.31384	1.31728	1.13291	1.00515	0.977564	0.942946	1.037	1.02488	1.25591	1.24436	1.26234	1.00249	1.1568	1.03328	1.01659	0.952675	1.12648	1.20188	1.18659	1.32446	1.07781
			HL	2.38573	2.0752	2.46749	2.1195	1.74792	2.46214	1.97849	1.8373	2.4103	2.19273	1.95466	2.86439	2.38065	2.30066	2.1538	2.16983	2.73604	3.14691	2.41076	2.70795	2.57271	2.39177	2.93089	2.57215	3.10885	2.26276	1.26524	0.835059	0.688659	0.747657	0.75632	1.21244	0.86314	1.4577	1.26943	1.40015	1.51284	1.60167	1.77407	1.81149	1.69441	1.91011	2.04603	2.07725	1.68067	2.0099
			LL	2.11668	2.10752	2.33019	2.4092	2.02542	2.10121	2.26822	2.1752	2.12864	1.83635	2.26758	2.22061	2.26419	2.19499	2.11239	2.27314	2.14864	2.43042	2.59402	1.99814	2.06258	2.5727	2.606	2.61861	3.20402	2.42447	1.47606	0.875806	1.03625	1.73815	1.99205	2.85416	3.59045	3.96102	3.95121	3.94822	3.97016	4.43367	3.98223	3.9689	3.85402	3.66123	3.51088	2.98494	2.74605	2.98225
		s.e.m.	HR	0.31949	0.254158	0.310608	0.307092	0.322017	0.284731	0.319278	0.355601	0.278275	0.259688	0.324718	0.295428	0.319216	0.33898	0.375427	0.351861	0.524514	0.476039	0.541394	0.608559	0.669355	0.649836	0.608393	0.876539	0.736616	0.579816	0.582263	0.504657	0.611772	0.607427	0.539434	0.801609	0.652088	0.701684	0.812171	0.756151	0.831641	1.10753	1.18154	1.26164	1.45141	1.38393	1.67375	1.45278	1.56454	1.16725
			LR	0.381409	0.432723	0.352441	0.364992	0.373817	0.301631	0.357889	0.397666	0.440125	0.42655	0.472005	0.276054	0.352517	0.431278	0.391554	0.374799	0.333914	0.366018	0.362759	0.352806	0.443892	0.395474	0.405687	0.618494	0.611269	0.431681	0.369743	0.394772	0.426019	0.327519	0.319126	0.299594	0.294179	0.365602	0.277533	0.277663	0.201624	0.257379	0.229373	0.259009	0.203904	0.257829	0.258175	0.295791	0.299104	0.272212
			HL	0.477639	0.429545	0.501875	0.464809	0.461591	0.554996	0.425085	0.503288	0.622243	0.584945	0.508492	0.853359	0.636465	0.649904	0.606471	0.702721	0.761248	1.05982	0.918978	0.791	1.14942	0.93027	1.31568	1.31756	1.72363	1.30139	0.427944	0.211695	0.159894	0.161883	0.199676	0.311841	0.260323	0.431807	0.399587	0.513424	0.464516	0.515801	0.468915	0.486006	0.446976	0.440755	0.466808	0.412429	0.386676	0.372163
			LL	0.456042	0.523107	0.635905	0.557618	0.478428	0.448307	0.506826	0.519319	0.479873	0.550758	0.593549	0.64286	0.664251	0.603091	0.632575	0.661751	0.778926	0.65322	0.925153	0.681713	0.626212	1.02683	1.2192	1.21997	1.51409	1.13783	0.454639	0.224211	0.303271	0.433488	0.604635	0.925211	1.21708	1.28853	1.30595	1.37882	1.34588	1.55615	1.51055	1.48762	1.43442	1.53352	1.37062	1.1992	1.01935	0.92607
		p value (vs. HR)	HR vs. LR	0.0949594	0.981833	0.64879	0.718567	0.675143	0.239089	0.626577	0.871165	0.380905	0.82038	0.391342	0.845695	0.572327	0.115458	0.637702	0.277605	0.810136	0.602546	0.903605	0.929158	0.96961	0.567645	0.503389	0.407711	0.108396	0.109827	0.566305	0.262722	0.197788	0.0242094	0.49785	0.0585733	0.212366	0.0553329	0.110092	0.210851	0.0376875	0.0876629	0.00771389	0.00307355	0.00316166	0.000960472	0.00178076	1.1932e-05	4.17462e-05	4.72647e-06
			HR vs. HL	0.452363	0.202209	0.184587	0.400367	0.613854	0.0655983	0.354641	0.657538	0.231862	0.468782	0.470999	0.220472	0.141821	0.252813	0.269904	0.584035	0.0979094	0.122827	0.548486	0.153106	0.533513	0.789683	0.274667	0.757729	0.446979	0.837301	0.668156	0.526654	0.548363	0.668219	0.737895	0.858245	0.353874	0.387025	0.231125	0.301534	0.0780013	0.0340738	0.0644734	0.062593	0.0613894	0.028486	0.0614273	0.0389215	0.00438962	0.00477296
			HR vs. LL	0.909926	0.184622	0.358103	0.279396	0.487323	0.284462	0.227446	0.837244	0.585027	0.327495	0.452378	0.205873	0.484882	0.152817	0.458936	0.367385	0.68188	0.220961	0.501123	0.475805	0.42788	0.682951	0.572285	0.273544	0.25879	0.375747	0.689157	0.691748	0.879107	0.42365	0.829072	0.638372	0.381158	0.509508	0.616391	0.538655	0.904384	0.821686	0.42171	0.503833	0.614315	0.272464	0.433121	0.02961	0.00727105	0.0107535
	Firing rate at late stage
				Time bin
				1	2	3	4	5	6	7	8	9	10	11	12	13	14	15	16	17	18	19	20	21	22	23	24	25	26	27	28	29	30	31	32	33	34	35	36	37	38	39	40	41	42	43	44	45	46
	Trial type	Mean	HR	1.65139	1.59354	1.44441	1.62009	1.58245	1.5863	1.43397	1.31745	1.46411	1.42889	1.41745	1.55135	1.5094	1.76806	1.83015	1.91009	2.38565	2.57022	2.45135	2.66547	2.80798	2.46125	2.33975	2.17314	1.36801	1.00999	0.52111	0.503326	0.580978	0.626279	1.02368	1.71545	2.20416	2.79487	3.04881	3.77426	3.7934	4.14646	4.30938	4.51135	4.38554	4.14735	3.78592	3.89589	3.68556	3.75066
			LR	1.3659	1.25318	1.31905	1.57961	1.61814	1.20275	1.75527	1.7001	1.69364	1.56234	2.24756	1.39807	1.73309	2.39582	2.40274	1.76976	2.33818	2.58512	2.50076	2.22565	1.7986	1.78543	1.60034	1.76035	0.876136	0.604146	0.900755	0.771913	0.784018	0.663308	0.883587	0.837127	1.39538	1.80867	1.77399	2.06186	1.67066	1.99531	2.05816	2.03829	2.06709	2.51576	2.13974	2.4492	1.85491	2.03038
			HL	0.987465	1.31753	1.65378	1.07541	0.952102	1.5438	1.20345	1.93045	2.75596	2.89595	2.65648	3.08349	2.8279	3.4521	3.21077	3.09652	2.70998	2.85489	2.75463	2.62417	2.71708	2.7018	2.44057	2.48809	2.13483	1.14768	1.02369	1.70143	1.12433	0.968839	1.10581	1.04837	1.04618	0.802334	1.34158	1.20164	1.45931	1.78139	1.1682	1.15286	0.989814	1.11313	1.27572	1.27601	1.37986	1.13775
			LL	1.68638	1.52676	1.32657	1.37059	1.32095	1.57072	1.68116	1.61449	1.89875	2.45164	2.59159	2.96716	3.16984	3.35368	3.0349	2.70444	2.63137	2.4253	2.28204	2.15909	2.16225	2.43949	2.88145	2.20448	1.8865	2.17674	2.46785	2.86503	3.27415	3.37285	3.09887	3.40271	2.89342	2.7502	2.32401	2.35376	2.17013	1.98613	2.14765	2.1579	2.06057	2.26465	2.31736	2.24967	2.34424	2.54265
		s.e.m.	HR	0.362767	0.345639	0.317883	0.324768	0.333415	0.337061	0.305217	0.278077	0.322774	0.286371	0.295906	0.340083	0.349174	0.457967	0.466132	0.532356	0.701096	0.855035	0.866691	0.901734	1.04115	0.920814	0.921785	0.852798	0.498862	0.329428	0.136177	0.131102	0.141959	0.135027	0.309737	0.605914	0.916172	1.32837	1.556	1.78972	1.78345	1.803	1.66302	1.53556	1.28605	1.08777	0.845746	0.869496	0.785471	0.758463
			LR	0.356247	0.311085	0.323591	0.337716	0.4174	0.322487	0.41371	0.471493	0.430945	0.479445	0.520091	0.369819	0.4174	0.638149	0.623741	0.610945	0.773003	0.828607	0.77777	0.864099	0.722311	0.691708	0.614338	0.564253	0.332385	0.21097	0.248081	0.249326	0.379573	0.299722	0.423609	0.462982	0.53015	0.818236	0.749825	0.786764	0.754472	0.787329	0.968216	0.724385	0.875577	0.902758	1.05345	0.95035	0.717238	0.674059
			HL	0.20633	0.312394	0.373961	0.247166	0.208208	0.363727	0.258177	0.369417	0.604309	0.74177	0.610417	0.813571	0.726842	0.779581	0.805347	0.896474	0.8717	1.14504	1.09446	0.993081	0.843301	1.05879	0.922749	0.877566	0.758951	0.338794	0.292602	0.631281	0.351897	0.254419	0.506042	0.361333	0.516274	0.220736	0.451544	0.30178	0.373122	0.454	0.293018	0.302426	0.27268	0.24467	0.328838	0.345262	0.298634	0.273799
			LL	0.288007	0.258676	0.21638	0.196883	0.228275	0.322748	0.322283	0.340984	0.388094	0.590766	0.621175	0.753083	0.931124	0.935602	0.791407	0.713881	0.658219	0.808901	0.764012	0.798932	0.819905	0.884368	1.13824	0.8416	0.644021	0.709852	0.937885	1.12673	1.29269	1.26436	1.19314	1.23126	1.03561	0.846731	0.733309	0.724172	0.689709	0.660849	0.776326	0.843509	0.77629	0.836833	0.904943	0.701757	0.689612	0.677602
		p value (vs. HR)	HR vs. LR	0.154198	0.0545816	0.601599	0.270262	0.251398	0.059857	0.690027	0.518689	0.727177	0.577906	0.158675	0.216184	0.736835	0.59657	0.549596	0.412546	0.046923	0.238593	0.467437	0.0459895	0.00987234	0.169717	0.00294221	0.552051	0.0880385	0.0479471	0.0395181	0.648229	0.300219	0.211206	0.301085	0.0122473	0.367364	0.387094	0.301569	0.069725	0.0332596	0.0989749	0.00204149	0.0213012	0.00097374	0.0115044	0.00132807	0.00473937	0.000553235	0.00150174
			HR vs. HL	0.241469	0.334335	0.889008	0.346755	0.132701	0.861126	0.556748	0.155916	0.0397004	0.368855	0.247431	0.257623	0.18297	0.0190547	0.0423187	0.170927	0.797692	0.737658	0.755642	0.372395	0.647657	0.8774	0.521422	0.279676	0.189172	0.673252	0.230078	0.228868	0.356973	0.400384	0.682962	0.349805	0.0475713	0.11949	0.280214	0.127516	0.566818	0.301405	0.00393538	0.00566123	0.000278011	0.00260459	0.000608875	0.000297179	0.00116141	0.000526732
			HR vs. LL	0.941511	0.793153	0.704462	0.977486	0.599386	0.675306	0.799511	0.520957	0.3846	0.284285	0.0758275	0.034045	0.0610549	0.0416015	0.0164779	0.0501714	0.650251	0.53	0.722357	0.267438	0.141042	0.70029	0.0502743	0.341856	0.262694	0.443246	0.18914	0.238732	0.265875	0.444665	0.388551	0.75933	0.89797	0.632144	0.734236	0.834193	0.555413	0.582408	0.0271179	0.0286511	0.0154694	0.0683081	0.0197815	0.0312478	0.0305115	0.0296927
	ROC value at early stage
				Time bin
				1	2	3	4	5	6	7	8	9	10	11	12	13	14	15	16	17	18	19	20	21	22	23	24	25	26	27	28	29	30	31	32	33	34	35	36	37	38	39	40	41	42	43	44	45	46
	Trial type	Mean	HR vs. HL	0.485655	0.490231	0.487671	0.484319	0.480279	0.485246	0.478309	0.47558	0.473903	0.453974	0.453283	0.46249	0.456721	0.480456	0.505375	0.510647	0.516322	0.52957	0.525997	0.54291	0.5527	0.561164	0.565243	0.583041	0.59846	0.600787	0.60985	0.610602	0.624632	0.61021	0.630237	0.630546	0.631833	0.624434	0.622211	0.626564	0.617388	0.610716	0.60528	0.606206	0.60088	0.596619	0.602173	0.602466	0.596148	0.593844
			HR vs. LR	0.491315	0.499783	0.507166	0.498719	0.498844	0.497914	0.492126	0.491637	0.504241	0.485383	0.498269	0.492504	0.497846	0.506913	0.50609	0.496714	0.496224	0.518626	0.526905	0.536789	0.548887	0.55943	0.571672	0.578862	0.589312	0.594238	0.601293	0.604094	0.617864	0.613489	0.62539	0.624846	0.629882	0.622877	0.620147	0.62888	0.620859	0.602669	0.607065	0.600142	0.597117	0.590399	0.593142	0.592672	0.583654	0.587055
			HR vs. LL	0.480748	0.485379	0.484632	0.469521	0.478666	0.475974	0.463816	0.467429	0.466654	0.447702	0.443079	0.451228	0.451905	0.465231	0.487799	0.476682	0.481141	0.498396	0.510943	0.522992	0.524018	0.526764	0.535618	0.547142	0.559065	0.567103	0.574033	0.577164	0.588149	0.583981	0.5983	0.605433	0.603461	0.592994	0.599654	0.602769	0.602489	0.5878	0.600014	0.587452	0.579825	0.57994	0.578154	0.59103	0.580456	0.576691
		s.e.m.	HR vs. HL	0.0061101	0.00857196	0.00936041	0.00669855	0.00857619	0.0100881	0.0126651	0.0146938	0.0190167	0.0201828	0.0215888	0.0251966	0.0255627	0.0190939	0.0109023	0.00863128	0.00773438	0.011913	0.0188275	0.0221591	0.0233764	0.0236592	0.019335	0.0188272	0.0217098	0.0202555	0.0209968	0.0216468	0.0217019	0.0198123	0.022476	0.0217552	0.0223737	0.0220384	0.0204704	0.0227638	0.0202025	0.0205234	0.0202927	0.0191675	0.017083	0.017044	0.014907	0.0176404	0.0165598	0.0145345
			HR vs. LR	0.00532977	0.00677361	0.00626471	0.00501081	0.0074126	0.00552035	0.00634335	0.00732301	0.00600485	0.00612686	0.00513809	0.00802172	0.0097265	0.00647925	0.00700848	0.00382764	0.00528314	0.010843	0.0163198	0.0212067	0.0220713	0.0231497	0.0181677	0.0188645	0.0218585	0.0204859	0.020747	0.0210354	0.0224113	0.0193349	0.020252	0.0222828	0.0242291	0.024447	0.022788	0.0248848	0.0231757	0.0216232	0.0212548	0.0196911	0.0175384	0.0177557	0.016744	0.0193557	0.017849	0.0155471
			HR vs. LL	0.00782956	0.0099669	0.0105188	0.00879749	0.00953655	0.0139034	0.0166945	0.0201271	0.0231569	0.0225428	0.0245705	0.0274577	0.0280497	0.021779	0.0152178	0.0192738	0.0181048	0.0181487	0.0209914	0.0245337	0.0264701	0.0277947	0.0216605	0.0204591	0.0187731	0.0155048	0.0148951	0.0149067	0.0176908	0.0161559	0.0167438	0.0156498	0.0169323	0.0190583	0.0169319	0.019481	0.0189285	0.0196903	0.0181988	0.0177727	0.0143272	0.0169801	0.0161027	0.0164553	0.0148362	0.0143266
		p value (vs. HR)	HR vs. HL	0.0709434	0.309277	0.00535375	0.00446486	0.00535375	0.298346	0.802781	0.117621	0.0366455	0.309266	0.451638	0.614529	0.174264	0.596676	0.187064	0.797966	0.00723406	0.0318171	0.198035	0.00535375	0.0769117	0.0121398	0.00259936	2.28635e-05	2.19886e-06	2.19886e-06	1.66289e-07	2.19886e-06	1.66289e-07	1.66289e-07	5.02306e-07	1.63897e-05	3.02776e-07	1.63897e-05	1.63897e-05	6.12712e-06	1.63897e-05	5.85749e-05	5.85749e-05	0.000439619	5.02306e-07	1.66289e-07	9.87517e-09	5.02306e-07	1.66187e-07	1.66187e-07
			HR vs. LR	0.126051	0.451638	0.0769183	0.309277	0.0709368	0.802786	0.451628	0.309277	0.309277	0.126042	0.309266	0.442224	1	0.251568	0.430913	0.417283	0.187075	0.117621	0.442224	0.0709434	0.0410541	0.0410541	4.0541e-06	6.12712e-06	1.66289e-07	9.87517e-09	5.02306e-07	2.19886e-06	5.85528e-05	6.12712e-06	6.12712e-06	0.000187265	5.85749e-05	4.21316e-05	6.12712e-06	0.000439747	0.00259879	2.28635e-05	0.00121094	0.000187265	0.000187265	0.00121094	5.02014e-07	0.000187265	0.000187204	1.66289e-07
			HR vs. LL	0.117621	0.309277	0.198045	0.000569191	0.00446579	0.117621	0.0366455	0.298346	0.430913	0.614521	0.207399	0.198045	0.187075	0.417296	0.606451	0.60646	0.430901	0.60646	0.309266	0.126051	1	0.451638	0.133329	0.00620065	2.28447e-05	1.66289e-07	5.02306e-07	3.21561e-08	2.19774e-06	1.45591e-06	1.45591e-06	5.02306e-07	1.0081e-07	0.00099123	5.85749e-05	0.000439747	0.00099123	1.63897e-05	4.21316e-05	0.000144074	6.12712e-06	0.000144074	2.28635e-05	1.63825e-05	5.85749e-05	9.8679e-09
	ROC value at middle stage
				Time bin
				1	2	3	4	5	6	7	8	9	10	11	12	13	14	15	16	17	18	19	20	21	22	23	24	25	26	27	28	29	30	31	32	33	34	35	36	37	38	39	40	41	42	43	44	45	46
	Trial type	Mean	HR vs. HL	0.487037	0.488598	0.488824	0.494559	0.484724	0.476442	0.48154	0.485438	0.474047	0.485886	0.490404	0.486805	0.500368	0.523533	0.528331	0.520773	0.530378	0.537717	0.545621	0.55006	0.553492	0.556527	0.568906	0.567222	0.576515	0.577694	0.572497	0.589118	0.597	0.600674	0.599903	0.613595	0.611929	0.610999	0.612177	0.609612	0.611069	0.60306	0.607011	0.600955	0.587736	0.594504	0.585951	0.592203	0.578557	0.568755
			HR vs. LR	0.505528	0.504072	0.496871	0.494857	0.493058	0.495826	0.489081	0.491506	0.499709	0.500088	0.495665	0.505124	0.513473	0.514859	0.520603	0.521711	0.530586	0.535595	0.553741	0.567593	0.575858	0.582379	0.590713	0.586882	0.582421	0.572825	0.576885	0.579339	0.594473	0.586895	0.583919	0.6	0.5991	0.597973	0.587828	0.595313	0.595602	0.59535	0.593086	0.601673	0.586854	0.59013	0.577151	0.573697	0.576298	0.555719
			HR vs. LL	0.494328	0.491245	0.493447	0.490479	0.493369	0.487453	0.484953	0.486926	0.489372	0.488395	0.486222	0.490203	0.487214	0.513226	0.506785	0.488445	0.476081	0.479043	0.487073	0.512219	0.534364	0.538402	0.548376	0.533674	0.538365	0.540315	0.548443	0.555853	0.564553	0.574739	0.566508	0.571167	0.564593	0.572973	0.574037	0.567771	0.572314	0.562915	0.572356	0.579432	0.557114	0.566176	0.558395	0.561368	0.556238	0.543148
		s.e.m.	HR vs. HL	0.00982248	0.00940486	0.0111555	0.00864636	0.0124536	0.0152611	0.0131686	0.0151788	0.0157217	0.0139918	0.0127715	0.0161159	0.017215	0.016892	0.0188585	0.0196175	0.0174851	0.020009	0.0205566	0.0226584	0.0255834	0.0229207	0.01951	0.0157364	0.0149342	0.0163517	0.0202047	0.0210305	0.0216488	0.0222034	0.022464	0.0219098	0.022888	0.0218168	0.0220542	0.0214487	0.0228166	0.022893	0.0212982	0.0210883	0.0190628	0.0210804	0.0191298	0.0188228	0.0195932	0.0180075
			HR vs. LR	0.00635098	0.00699665	0.00524278	0.00643854	0.00662677	0.00596443	0.0054744	0.00915685	0.00837579	0.00956033	0.00855102	0.00697271	0.00881595	0.00947091	0.0129076	0.0145262	0.0130575	0.0163387	0.0192336	0.020985	0.0229659	0.0205999	0.0170964	0.0150775	0.0148725	0.0168967	0.0198332	0.0224869	0.023495	0.0224253	0.0242984	0.024226	0.0232254	0.0237384	0.0239933	0.0221336	0.0228765	0.0227029	0.0231704	0.023578	0.0193979	0.0205425	0.0207454	0.0205042	0.0197063	0.0190058
			HR vs. LL	0.00863491	0.0106393	0.00906117	0.00953266	0.00855451	0.0102988	0.0104439	0.0131364	0.0137512	0.0142357	0.010277	0.0121315	0.0168046	0.0183243	0.0225138	0.0265853	0.0279027	0.0265716	0.0287353	0.0294494	0.0265316	0.0221401	0.0182964	0.0183936	0.016823	0.0153119	0.0189405	0.0205468	0.0197711	0.0207907	0.0214868	0.0233147	0.024497	0.0208674	0.0214232	0.0201942	0.0224799	0.0208986	0.0212677	0.021312	0.0178413	0.0176468	0.0161489	0.016535	0.0172692	0.015585
		p value (vs. HR)	HR vs. HL	0.0337144	0.104082	0.0364402	0.488755	1	0.818754	0.239477	1	0.0989651	0.154163	0.638456	0.15415	0.811908	0.146481	0.343403	0.632087	1	0.818754	0.00492474	0.0191825	0.246524	0.033717	0.0105136	9.66041e-06	5.73346e-09	2.42572e-05	2.71104e-06	2.71195e-06	2.71195e-06	6.87443e-07	7.07881e-06	2.71104e-06	7.07881e-06	6.87443e-07	5.8761e-05	7.07881e-06	7.07881e-06	0.000852297	5.8761e-05	2.42572e-05	7.07881e-06	0.000175606	1.86079e-06	0.000137408	0.000393868	0.00940384
			HR vs. LR	0.0989651	0.154163	0.815622	0.48223	1	0.351206	0.0173077	0.334336	0.48223	0.638456	0.0307113	0.465544	0.221883	0.8075	0.0202873	0.137748	0.00359129	0.482223	0.343425	0.00492537	2.71104e-06	7.07881e-06	1.0525e-09	3.1581e-10	1.00233e-06	8.42405e-08	0.00248627	0.000393868	2.42572e-05	0.000175606	0.00103153	5.8761e-05	0.000393868	2.42572e-05	0.000393868	0.000480134	0.00103153	0.00103153	0.00213639	2.71195e-06	0.00103153	0.00492474	0.0042677	0.033717	0.00213639	0.160871
			HR vs. LL	0.821398	0.818754	1	0.239477	0.818754	0.48223	0.00492411	0.239408	0.00248591	1	0.638456	0.0989651	0.638456	0.482223	0.818751	0.818751	1	0.48223	0.488755	0.246524	0.246524	0.821398	0.00103153	0.0105136	0.0105136	0.00103153	0.0611987	0.00213607	0.0191825	2.42572e-05	0.00103153	2.71195e-06	0.00103153	5.8761e-05	6.87443e-07	0.00213639	0.00492537	0.033717	0.00940384	2.45084e-07	2.42572e-05	1.00233e-06	0.00103153	5.8761e-05	5.8761e-05	0.00213639
	ROC value at late stage
				Time bin
				1	2	3	4	5	6	7	8	9	10	11	12	13	14	15	16	17	18	19	20	21	22	23	24	25	26	27	28	29	30	31	32	33	34	35	36	37	38	39	40	41	42	43	44	45	46
	Trial type	Mean	HR vs. HL	0.52212	0.511801	0.51082	0.496436	0.471338	0.479619	0.475169	0.476727	0.495484	0.500859	0.498913	0.495201	0.487349	0.478066	0.488975	0.50655	0.52137	0.519673	0.52057	0.553101	0.566004	0.566085	0.567043	0.578478	0.589247	0.595852	0.58179	0.568083	0.551119	0.533982	0.526388	0.534954	0.526505	0.542254	0.544474	0.543357	0.542174	0.538156	0.52656	0.532318	0.526398	0.530803	0.521872	0.513306	0.514249	0.516249
			HR vs. LR	0.508107	0.491174	0.503345	0.492891	0.497409	0.488848	0.489933	0.499191	0.500187	0.504096	0.517507	0.507277	0.515854	0.489302	0.502322	0.516585	0.51103	0.519419	0.532724	0.543722	0.54341	0.550021	0.556628	0.564742	0.568738	0.56879	0.57052	0.551624	0.54456	0.539184	0.536475	0.547242	0.544458	0.522263	0.530925	0.533747	0.529868	0.527502	0.522717	0.529174	0.521443	0.513505	0.519528	0.519225	0.521155	0.519971
			HR vs. LL	0.50436	0.500895	0.507045	0.496633	0.490255	0.480947	0.474897	0.482257	0.497346	0.505679	0.505703	0.491479	0.481242	0.463458	0.460667	0.475862	0.484418	0.503044	0.520385	0.537101	0.54331	0.539378	0.531915	0.540047	0.545859	0.550386	0.545719	0.540416	0.531497	0.524755	0.522321	0.526173	0.52464	0.516976	0.518197	0.520807	0.516716	0.516376	0.507977	0.516933	0.503863	0.507522	0.509056	0.512829	0.511603	0.510395
		s.e.m.	HR vs. HL	0.00992837	0.0105059	0.0117813	0.0118347	0.0143615	0.0133881	0.0105267	0.0122196	0.0109623	0.0096769	0.0101995	0.00841012	0.0106907	0.0140567	0.0120934	0.0159859	0.0166629	0.0179111	0.0209131	0.0197656	0.0207815	0.0189516	0.018324	0.01612	0.0159236	0.015043	0.0154354	0.0117544	0.0132602	0.0121747	0.0125892	0.0130166	0.0149513	0.0125567	0.0126274	0.0122389	0.0129348	0.0121649	0.0113816	0.0111399	0.011491	0.010307	0.0100163	0.00891693	0.0109934	0.00946481
			HR vs. LR	0.00630834	0.00770023	0.00806821	0.00968611	0.00729198	0.00777623	0.00705445	0.00590124	0.00806863	0.00689545	0.00977441	0.00806572	0.0082357	0.00584057	0.00700105	0.0125176	0.0144295	0.0161737	0.0167401	0.0176942	0.0172943	0.0169379	0.0157732	0.0155238	0.015158	0.0165035	0.0155887	0.0144141	0.0148919	0.0129742	0.0129755	0.0146942	0.0140353	0.0128374	0.0125814	0.0129878	0.0120387	0.0110044	0.0118209	0.0119896	0.0105048	0.0117525	0.010091	0.00990224	0.00825098	0.00935258
			HR vs. LL	0.00855765	0.00739991	0.0070752	0.00672615	0.00782057	0.00958631	0.00983952	0.00790196	0.0062434	0.00654338	0.00609449	0.00636859	0.0112559	0.0169067	0.0188159	0.02028	0.0208471	0.0204027	0.0210206	0.0205437	0.0191032	0.0167413	0.0120824	0.0124234	0.0130667	0.0109268	0.0117069	0.0107544	0.0106467	0.010182	0.0101372	0.0110925	0.0101017	0.00976269	0.0119132	0.0111206	0.0118415	0.0108983	0.0105146	0.00903084	0.00976956	0.00892965	0.00777382	0.00762157	0.00613024	0.00607594
		p value (vs. HR)	HR vs. HL	0.00147996	0.0301586	0.0198284	0.527738	0.838234	0.838233	0.297552	0.527726	0.201338	0.0161013	0.0161013	0.655403	0.243911	0.639135	0.330876	0.0582994	0.00339748	0.0447955	0.369093	1.94177e-05	5.63371e-05	1.5029e-06	6.1549e-06	8.64175e-09	6.96201e-10	2.75276e-12	1.47549e-10	1.55159e-12	8.65906e-05	0.000759459	0.000183738	4.81245e-06	1.50415e-06	0.000121143	0.000151444	3.23071e-05	8.50438e-06	0.00015146	8.6581e-05	0.000151427	0.000635266	2.54998e-05	0.00924959	0.097012	0.00659153	0.12615
			HR vs. LR	0.020766	0.849103	0.0569455	0.442424	0.0351616	0.850924	0.562779	0.0770858	0.00627057	0.0478037	3.62063e-05	0.0019449	0.00286306	0.665565	0.00726385	0.00510466	0.122749	0.0257226	0.0257239	3.68661e-06	0.000138217	2.14298e-06	1.28506e-07	2.12764e-10	7.53569e-11	8.15806e-09	8.15908e-09	0.000187894	0.00281658	0.000317114	8.13892e-05	2.71192e-06	1.3015e-05	0.000603937	0.008326	1.58988e-05	0.00256107	1.30179e-05	0.00142771	3.07549e-07	0.000227473	0.000138201	0.00318716	0.000317114	0.000603937	0.00152997
			HR vs. LL	0.0917036	0.452581	0.852561	0.0917048	0.259067	0.0917048	0.0917048	0.091706	1	1	0.562776	0.017517	0.690071	0.414749	0.545006	0.690071	0.690071	0.248453	1	0.000690013	0.132046	0.000776847	0.000364443	3.34326e-06	3.34299e-06	5.14822e-07	1.89983e-05	0.000187894	0.00281688	0.0621152	0.00281688	0.000187894	0.00896995	0.259067	0.0596225	0.0089702	0.0147802	0.00490293	0.0251339	0.00142782	0.708678	0.0884459	0.242365	0.000364425	0.00256107	0.0207679
	Licking rate at early stage
				Time bin
				1	2	3	4	5	6	7	8	9	10	11	12	13	14	15	16	17	18	19	20	21	22	23	24	25	26	27	28	29	30	31	32	33	34	35	36	37	38	39	40	41	42	43	44	45	46
	Trial type	Mean	HR	0.0384025	0.0238949	0.0356527	0.112584	0.0119474	0	0.111443	0.121876	0	0	0.0119474	0.0119474	0.0448934	0	0	0	0.0119474	0	0	0	0	0	0	0	0	0	0	0	0	0	0	0.02849	0	0	0	0	0.075533	0.0817652	0.558798	0.593203	1.11219	1.06315	1.68284	2.03692	2.77221	2.61402
			LR	0	0.011396	0	0	0	0.123457	0	0.0119474	0	0.0119474	0.135404	0.123457	0.0119474	0	0.0119474	0	0	0	0	0	0	0	0	0	0	0	0	0	0	0	0	0	0	0	0	0.0119474	0.0119474	0.0119474	0.0472383	0.0477897	0.140459	0.222988	0.162909	0.151303	0.187299	0.246081
			HL	0	0	0.037037	0	0.0274348	0	0	0	0	0	0	0	0	0	0	0	0	0	0	0	0	0	0	0	0	0	0	0	0	0	0	0	0	0	0	0	0.109739	0.164609	0.0548697	0.0548697	0.150892	0.0823045	0.164609	0.306837	0.0960219	0.668544
			LL	0	0.0238949	0.0274348	0	0.0274348	0.0274348	0.0274348	0	0	0	0	0	0.0274348	0	0	0	0	0	0	0	0	0	0	0	0	0	0	0	0	0	0	0	0	0.0274348	0	0.0823045	0.137174	0.128944	0.45851	0.593687	1.6812	1.61295	2.16572	2.76335	3.04575	3.82845
		s.e.m.	HR	0.0213285	0.0238949	0.0262221	0.0564219	0.0119474	0	0.0562777	0.0584179	0	0	0.0119474	0.0119474	0.031128	0	0	0	0.0119474	0	0	0	0	0	0	0	0	0	0	0	0	0	0	0.0197543	0	0	0	0	0.0367612	0.0617541	0.223658	0.222074	0.312688	0.349037	0.460479	0.483588	0.448298	0.470647
			LR	0	0.011396	0	0	0	0.0684815	0	0.0119474	0	0.0119474	0.068695	0.0684815	0.0119474	0	0.0119474	0	0	0	0	0	0	0	0	0	0	0	0	0	0	0	0	0	0	0	0	0.0119474	0.0119474	0.0119474	0.0371903	0.0477897	0.0892209	0.14731	0.111529	0.101394	0.131399	0.149617
			HL	0	0	0.0205445	0	0.0274348	0	0	0	0	0	0	0	0	0	0	0	0	0	0	0	0	0	0	0	0	0	0	0	0	0	0	0	0	0	0	0	0.109739	0.164609	0.0548697	0.0548697	0.11571	0.0823045	0.114136	0.127063	0.067309	0.229118
			LL	0	0.0238949	0.0274348	0	0.0274348	0.0274348	0.0274348	0	0	0	0	0	0.0274348	0	0	0	0	0	0	0	0	0	0	0	0	0	0	0	0	0	0	0	0	0.0274348	0	0.0823045	0.137174	0.090471	0.247951	0.168404	0.29926	0.296592	0.271335	0.252843	0.456057	0.315333
	Licking rate at middle stage
				Time bin
				1	2	3	4	5	6	7	8	9	10	11	12	13	14	15	16	17	18	19	20	21	22	23	24	25	26	27	28	29	30	31	32	33	34	35	36	37	38	39	40	41	42	43	44	45	46
	Trial type	Mean	HR	0.0751829	0.103233	0.00935016	0.197498	0.0687512	0.217439	0.0280505	0.158745	0.0220004	0.0768049	0	0.00935016	0	0	0.059401	0.131666	0.0187003	0.0187003	0	0	0	0	0	0	0	0	0	0	0	0	0	0	0	0.131666	0.1137	0.0467508	0.159716	0.224786	0.412821	0.663995	1.43224	2.40922	3.8493	3.29159	3.36572	3.71379
			LR	0	0.0969662	0	0.00962927	0	0.00962927	0	0.0201613	0.0192585	0.00962927	0.156257	0	0	0.0192585	0	0.087184	0.00962927	0	0.087184	0	0	0	0	0	0	0	0	0	0	0	0	0	0	0	0	0	0.00962927	0	0.0192585	0.0192585	0.0864342	0.0966748	0.0204813	0.247097	0.20359	0.266967
			HL	0.169779	0	0.0848896	0	0	0	0	0.16129	0.322581	0	0	0.16129	0	0	0	0	0	0	0	0	0	0	0	0	0	0	0	0	0	0	0	0	0	0	0	0	0.200501	0.115612	0.423236	0.115612	0.0614439	0.323389	0.453957	0.523082	0.70135	1.10728
			LL	0	0.0488759	0.0293255	0	0.0672043	0.0672043	0	0	0.0672043	0.0512033	0	0	0	0.0977517	0	0	0	0	0	0	0	0	0	0	0	0	0	0	0	0	0	0	0	0	0.268817	0.415445	0.620723	1.01442	1.00435	1.8693	2.01453	2.41716	2.20665	2.54922	3.66583	3.58162
		s.e.m.	HR	0.028242	0.0445632	0.00935016	0.0822251	0.0234487	0.0424685	0.0280505	0.0563617	0.015478	0.0319764	0	0.00935016	0	0	0.0223483	0.0548167	0.0187003	0.0187003	0	0	0	0	0	0	0	0	0	0	0	0	0	0	0	0.0548167	0.0306326	0.0194639	0.059544	0.0603162	0.0928018	0.160357	0.216179	0.291831	0.344038	0.264401	0.242197	0.297191
			LR	0	0.0364107	0	0.00962927	0	0.00962927	0	0.0201613	0.0192585	0.00962927	0.0610344	0	0	0.0192585	0	0.0362976	0.00962927	0	0.0362976	0	0	0	0	0	0	0	0	0	0	0	0	0	0	0	0	0	0.00962927	0	0.0192585	0.0192585	0.0326483	0.0333432	0.0204813	0.0688468	0.0696665	0.0694285
			HL	0.0706848	0	0.0353424	0	0	0	0	0.0671505	0.134301	0	0	0.0671505	0	0	0	0	0	0	0	0	0	0	0	0	0	0	0	0	0	0	0	0	0	0	0	0	0.0747826	0.0449339	0.118913	0.0449339	0.0614439	0.163871	0.141665	0.138987	0.208734	0.248624
			LL	0	0.0203486	0.0293255	0	0.0279794	0.0279794	0	0	0.0279794	0.0213176	0	0	0	0.0406973	0	0	0	0	0	0	0	0	0	0	0	0	0	0	0	0	0	0	0	0	0.111918	0.116724	0.153032	0.240204	0.265429	0.428952	0.351295	0.34937	0.386866	0.40077	0.467685	0.433906
	Licking rate at late stage
				Time bin
				1	2	3	4	5	6	7	8	9	10	11	12	13	14	15	16	17	18	19	20	21	22	23	24	25	26	27	28	29	30	31	32	33	34	35	36	37	38	39	40	41	42	43	44	45	46
	Trial type	Mean	HR	0.0562984	0	0	0.0281492	0	0	0	0	0	0.00485909	0	0	0	0	0	0	0	0	0	0	0	0	0	0	0	0	0	0	0	0	0	0	0	0	0	0.0591541	0.205717	0.425062	1.02249	1.18254	2.13406	2.80522	3.60712	3.89056	3.88981	4.65764
			LR	0.217687	0.128894	0	0	0.108844	0.108844	0	0	0	0	0	0.108844	0	0.128894	0.128894	0	0	0	0	0	0	0	0	0	0	0	0	0	0	0	0	0	0	0	0	0	0	0.0874636	0.0453515	0	0	0	0.0453515	0.216357	0.0453515	0.26563
			HL	0.0281492	0.0281492	0.0281492	0.0281492	0.0281492	0.0281492	0.0281492	0.0281492	0.0281492	0.0281492	0.0281492	0.0281492	0.0281492	0.0281492	0.0281492	0.0281492	0.0886178	0.0281492	0.0281492	0.0281492	0.0281492	0.0281492	0.0281492	0.0281492	0.0281492	0.0281492	0.0281492	0.0281492	0.0281492	0.0281492	0.0281492	0.0281492	0.0281492	0.0281492	0.0281492	0.0281492	0.0281492	0.0281492	0.0281492	0.0281492	0.0281492	0.0281492	0.0281492	0.517945	0.0281492	0.13019
			LL	0.0401616	0.0470958	0.0344927	0.0470958	0.0470958	0	0	0	0	0.0815884	0.0470958	0	0.0470958	0.0470958	0.0344927	0.0470958	0	0.0697715	0	0	0	0	0	0	0	0	0	0	0	0	0	0	0	0	0.0514995	0.163963	0.458226	1.23229	1.41421	2.13093	2.67613	3.35011	3.79991	4.42637	5.30242	6.04116
		s.e.m.	HR	0.0272553	0	0	0.0136277	0	0	0	0	0	0.00485909	0	0	0	0	0	0	0	0	0	0	0	0	0	0	0	0	0	0	0	0	0	0	0	0	0	0.0413903	0.0840214	0.0903473	0.229965	0.29959	0.372609	0.339701	0.443933	0.451878	0.444983	0.463699
			LR	0.105387	0.0498046	0	0	0.0526937	0.0526937	0	0	0	0	0	0.0526937	0	0.0498046	0.0498046	0	0	0	0	0	0	0	0	0	0	0	0	0	0	0	0	0	0	0	0	0	0	0.0494339	0.0317325	0	0	0	0.0317325	0.0667419	0.0317325	0.114637
			HL	0.00856553	0.00856553	0.00856553	0.00856553	0.00856553	0.00856553	0.00856553	0.00856553	0.00856553	0.00856553	0.00856553	0.00856553	0.00856553	0.00856553	0.00856553	0.00856553	0.029316	0.00856553	0.00856553	0.00856553	0.00856553	0.00856553	0.00856553	0.00856553	0.00856553	0.00856553	0.00856553	0.00856553	0.00856553	0.00856553	0.00856553	0.00856553	0.00856553	0.00856553	0.00856553	0.00856553	0.00856553	0.00856553	0.00856553	0.00856553	0.00856553	0.00856553	0.00856553	0.187929	0.00856553	0.0710731
			LL	0.0141995	0.0143308	0.013328	0.0143308	0.0143308	0	0	0	0	0.0177573	0.0143308	0	0.0143308	0.0143308	0.013328	0.0143308	0	0.0167746	0	0	0	0	0	0	0	0	0	0	0	0	0	0	0	0	0.0210339	0.0472127	0.0929544	0.234108	0.254292	0.352626	0.335613	0.377539	0.424295	0.445883	0.338102	0.302286
[truncated: 94 more columns]

## Sheet: Fig. 6B
Fig. 6B	Data	Averaged firing rate for 5 s after the FL in the HR trial of aDLS neurons
	Group	Number of FL-HR neurons in the aDLS; 27, 31, and 49 neurons for early, middle, and late stages, respectively.
	Softwear	matlab ver 2019
	Dependent variable	Firing rate (Hz)
	Stats	Kruskalwallis test; HR trial, χ2 = 16.396178412037063, p = 0.000275178878078587 post hoc Tukey–Kramer test; early vs. middle; p = 0.725814141560198 early vs. late; p = 0.00071709399815345 middle vs. late; p = 0.008780196306714
			Firing rate
	Learning stage	early	2.71154
		early	2.7
		early	2.09615
		early	5.04615
		early	5.47308
		early	0.448
		early	2.44
		early	5.124
		early	1.048
		early	3.092
		early	3.028
		early	5.724
		early	2.892
		early	3.53571
		early	4.33214
		early	5.58095
		early	3.5619
		early	1.3
		early	1.2
		early	4.32727
		early	5.41212
		early	0.866667
		early	8.27419
		early	1.10385
		early	3.35
		early	5.04375
		early	3.70986
		middle	1.6069
		middle	0.92069
		middle	7.1541
		middle	2.1
		middle	6.15238
		middle	0.352381
		middle	1.36667
		middle	1.40476
		middle	0.438095
		middle	9.07451
		middle	3.09836
		middle	0.872131
		middle	1.49836
		middle	0.442623
		middle	0.596721
		middle	3.29565
		middle	3.30204
		middle	9.53469
		middle	9.14286
		middle	0.42449
		middle	3.61633
		middle	4.90435
		middle	0.997101
		middle	5.32464
		middle	1.32174
		middle	4.70435
		middle	4.58961
		middle	6.4597
		middle	4.84179
		middle	7.12836
		middle	3.50149
		late	1.74146
		late	0.636111
		late	0.680556
		late	0.141667
		late	1.29722
		late	0.994444
		late	2.65
		late	0.558333
		late	1.73012
		late	0.537349
		late	1.17831
		late	0.506024
		late	2.09157
		late	4.41205
		late	0.662651
		late	0.759036
		late	0.289157
		late	0.704878
		late	0.234146
		late	0.356098
		late	5.69268
		late	0.765517
		late	0.613793
		late	0.503448
		late	1.16207
		late	2.18551
		late	3.28571
		late	3.20471
		late	2.28941
		late	0.752941
		late	1.64706
		late	1.25647
		late	3.73647
		late	1.7573
		late	0.755056
		late	2.35281
		late	0.660674
		late	1.15955
		late	0.498876
		late	0.894382
		late	4.16854
		late	10.5798
		late	9.65507
		late	1.64638
		late	2.45333
		late	1.50133
		late	4.30933
		late	0.893827
		late	0.691358

## Sheet: Fig. 6C
Fig. 6C	Data	Averaged total number of time bins above 3 S.D. of the baseline firing for 5 s after the FL in the HR trial of aDLS neurons
	Group	Number of FL-HR neurons in the aDLS; 27, 31, and 49 neurons for early, middle, and late stages, respectively.
	Softwear	matlab ver 2019
	Dependent variable	Number of bins
	Stats	Kruskalwallis test; HR trial, χ2 = 12.803459662729892, p = 0.001658685543808 post hoc Tukey–Kramer test; early vs. middle; p = 0.173232869547714 early vs. late; p = 0.001084451916471 middle vs. late; p = 0.218845881779725
			Total number of time bins
	Learning stage	early	30
		early	52
		early	0
		early	47
		early	44
		early	30
		early	24
		early	2
		early	21
		early	38
		early	33
		early	0
		early	10
		early	11
		early	6
		early	51
		early	11
		early	8
		early	3
		early	100
		early	0
		early	6
		early	31
		early	0
		early	48
		early	2
		early	0
		middle	15
		middle	2
		middle	0
		middle	0
		middle	64
		middle	0
		middle	0
		middle	0
		middle	6
		middle	66
		middle	57
		middle	2
		middle	0
		middle	0
		middle	1
		middle	7
		middle	6
		middle	90
		middle	69
		middle	4
		middle	7
		middle	18
		middle	2
		middle	30
		middle	20
		middle	0
		middle	0
		middle	0
		middle	0
		middle	13
		middle	29
		late	5
		late	0
		late	18
		late	3
		late	6
		late	12
		late	0
		late	4
		late	0
		late	0
		late	2
		late	2
		late	7
		late	7
		late	1
		late	0
		late	3
		late	2
		late	7
		late	1
		late	6
		late	8
		late	1
		late	1
		late	3
		late	0
		late	0
		late	0
		late	0
		late	31
		late	0
		late	5
		late	69
		late	0
		late	0
		late	0
		late	3
		late	0
		late	21
		late	0
		late	0
		late	53
		late	1
		late	0
		late	1
		late	0
		late	0
		late	1
		late	1

## Sheet: Fig. 6D
Fig. 6D	Data	Cumulative probability of the proportion of FL-HR neurons at the early, middle, and late stages
	Group	Number of FL-HR neurons in the aDLS; 27, 31, and 49 neurons for early, middle, and late stages, respectively.
	Softwear	matlab ver 2019
	Dependent variable	Averaged number of event-related neurons
	Stats	Kruskalwallis test; χ2 = 39.2799, p = 0.0000000029544 post hoc Tukey–Kramer test; early vs. middle; p = 0.000000130511032203628 early vs. late; p = 0.994529962979317 middle vs. late; p = 0.000000227469774682909
			Cumulative probability of the proportion
	Learning stage	early	8.08824
		early	8.82353
		early	8.08824
		early	9.19118
		early	9.19118
		early	8.45588
		early	9.55882
		early	10.2941
		early	9.19118
		early	8.82353
		early	9.55882
		early	8.45588
		early	9.55882
		early	9.92647
		early	10.2941
		early	9.92647
		early	9.19118
		early	8.82353
		early	9.55882
		early	9.19118
		middle	4.94505
		middle	6.59341
		middle	6.04396
		middle	5.76923
		middle	6.86813
		middle	6.59341
		middle	5.21978
		middle	5.76923
		middle	5.76923
		middle	5.49451
		middle	7.96703
		middle	5.76923
		middle	6.31868
		middle	6.31868
		middle	6.59341
		middle	5.76923
		middle	5.76923
		middle	6.86813
		middle	6.59341
		middle	4.67033
		late	9.16667
		late	9.44444
		late	8.33333
		late	9.16667
		late	9.44444
		late	7.77778
		late	12.5
		late	8.88889
		late	9.16667
		late	9.72222
		late	8.61111
		late	9.44444
		late	8.88889
		late	10
		late	9.44444
		late	8.61111
		late	10
		late	10.2778
		late	9.44444
		late	8.05556

## Sheet: Fig. 6E
Fig. 6E	Data	Distribution of the correlation coefficient between the numbers of spikes of aDLS FL-HR neurons and licking
	Group	Number of FL-HR neurons in the aDLS; 27, 31, and 49 neurons for early, middle, and late stages, respectively.
	Softwear	matlab ver 2019
	Dependent variable	Calculated number of event-related neurons
	Stats	Pearson's linear correlation coefficient;
			r	p value
	# of neurons	1	-0.148492	0.433557
		2	-0.20313	0.319615
		3	-0.133196	0.525611
		4	0.00355161	0.980064
		5	-0.18839	0.185534
		6	-0.211077	0.371692
		7	-0.1822	0.260486
		8	0.0162756	0.912571
		9	0.285301	0.0825194
		10	0.215055	0.281368
		11	-0.317543	0.0591345
		12	-0.168368	0.242487
		13	-0.0198089	0.891394
		14	0.257072	0.0557939
		15	0.153973	0.270987
		16	-0.0926732	0.574713
		17	-0.326579	0.0193376
		18	-0.29855	0.0254177
		19	0.091354	0.432542
		20	0.0954329	0.468251
		21	0.186942	0.274954
		22	0.195527	0.359863
		23	0.143956	0.248838
		24	-0.138333	0.304799
		25	-0.119163	0.368688
		26	0.0274429	0.833713
		27	0.0326961	0.776274
		28	-0.0831368	0.634926
		29	0.0407729	0.724782
		30	-0.0168623	0.89144
		31	0.0881023	0.499561
		32	-0.244263	0.0346903
		33	-0.129732	0.384777
		34	-0.0179347	0.886346
		35	-0.1017	0.468689
		36	0.224093	0.121643
		37	-0.197701	0.262384
		38	-0.10858	0.589817
		39	0.0879344	0.500382
		40	0.0197645	0.906244
		41	0.296141	0.0456816
		42	-0.0398035	0.724236
		43	0.150489	0.514968
		44	-0.123208	0.604805
		45	-0.358524	0.144022
		46	0.0275218	0.879161
		47	-0.21807	0.247
		48	0.0184834	0.90987
		49	0.0785396	0.728278
		50	0.0125014	0.944951
		51	0.36521	0.0309838
		52	0.159733	0.359364
		53	-0.0147206	0.921768
		54	-0.243352	0.146678
		55	-0.185384	0.26515
		56	-0.120206	0.391248
		57	-0.0214147	0.928595
		58	-0.137734	0.390475
		59	0.127921	0.356622
		60	-0.24104	0.114981
		61	-0.362868	0.0213769
		62	-0.121937	0.478665
		63	-0.174857	0.189242
		64	0.0566494	0.728441
		65	0.170661	0.298923
		66	-0.225058	0.186936
		67	-0.375192	0.00859783
		68	0.202008	0.188509
		69	-0.0342034	0.85257
		70	0.0637872	0.670136
		71	0.0627779	0.622146
		72	-0.162065	0.20074
		73	-0.149612	0.321005
		74	0.175612	0.217713
		75	0.174049	0.152633
		76	0.347935	0.00364462
		77	0.0926972	0.435381
		78	-0.201184	0.15267
		79	0.131582	0.40618
		80	0.0492616	0.742287
		81	-0.197621	0.0733235
		82	-0.126467	0.538144
		83	-0.0419157	0.756879
		84	0.0165808	0.899075
		85	-0.139827	0.354022
		86	-0.117332	0.389125
		87	0.0863951	0.470536
		88	0.168926	0.44099
		89	0.259322	0.121165
		90	-0.142816	0.252643
		91	0.0336766	0.772733
		92	-0.160642	0.297557
		93	-0.118604	0.402345
		94	-0.257993	0.0596304
		95	-0.0708146	0.590809
		96	-0.142654	0.333425
		97	0.280221	0.133652
		98	-0.202637	0.0949488
		99	0.0493665	0.693852
		100	-0.0203962	0.89671
		101	0.367716	0.00238594
		102	0.425279	0.000705942
		103	0.0240487	0.845657
		104	-0.0429083	0.753522
		105	0.164483	0.176838
		106	0.466716	0.00313903
		107	0.224744	0.112839

## Sheet: Fig. 6F
Fig. 6F	Data	Firing rate, auROC and licking rate after the reward outcome of FL-HR neurons in the pVLS at the early, middle, and late stages.
	Group	Number of FL-HR neurons in the pVLS; 17, 11, and 64 neurons for early, middle, and late stages, respectively.
	Softwear	matlab ver 2019
	Stats
	Firing rate at early stage
				Time bin
				1	2	3	4	5	6	7	8	9	10	11	12	13	14	15	16	17	18	19	20	21	22	23	24	25	26	27	28	29	30	31	32	33	34	35	36	37	38	39	40	41	42	43	44	45	46
	Trial type	Mean	HR	3.13307	2.99168	3.11848	3.39513	3.09869	3.19934	3.0908	3.14059	2.71477	2.8417	2.70617	2.87686	2.89889	2.44566	2.68779	2.72168	2.36875	2.35147	2.25429	2.2042	2.73063	2.34501	2.52045	2.27087	1.61886	2.0074	1.6713	1.91844	1.5522	2.21712	2.52535	2.33985	2.51477	3.3571	2.90863	2.99088	3.73661	3.17593	3.00245	4.05247	3.46216	3.98908	4.66704	4.54244	4.91009	5.11942
			LR	2.98976	3.31791	3.4466	2.49462	2.87376	2.57113	2.64329	2.82486	2.86776	2.54331	2.60342	2.45267	2.48383	1.96489	2.53091	2.43254	2.46141	2.3903	2.75696	2.22317	2.39021	2.0312	2.32471	2.53097	2.48408	1.87282	1.47767	1.61023	1.92556	2.10999	2.55274	2.36878	2.85815	2.20795	2.77477	2.61681	2.48706	2.57902	2.8158	3.17001	2.73177	3.59694	3.6123	3.59751	3.84919	4.18152
			HL	3.36277	2.75228	2.44086	3.16536	3.05177	2.83616	2.87124	3.01658	2.75812	2.81772	2.70694	2.67204	2.84514	2.8107	2.79014	2.69605	2.51377	2.3915	2.28537	2.44679	2.22783	2.12856	2.77034	2.364	2.95086	2.65156	2.2703	1.70481	1.97456	2.15403	2.03897	2.30934	2.17935	2.23478	2.42459	2.36073	1.88082	2.93994	3.01527	2.79721	2.51936	2.80435	2.73776	3.35175	3.17644	2.73744
			LL	2.99821	3.29971	2.8816	2.78472	2.88496	2.84321	2.55381	3.21237	3.23779	2.75392	2.87255	2.532	3.39156	2.80007	3.0065	2.66808	2.95368	2.83699	2.46939	2.96035	2.98816	2.62195	3.19012	3.15905	2.94736	2.30372	1.9116	1.9748	1.98038	1.7389	1.94167	1.6638	1.45894	2.17714	2.1543	2.00167	2.20818	3.08397	2.83037	2.72482	2.97962	3.0964	2.92466	4.14339	4.14265	4.48091
		s.e.m.	HR	1.61368	1.61546	1.88959	1.81326	1.80042	1.66619	1.79978	1.82925	1.26272	1.51845	1.58134	1.48138	1.50611	1.45142	1.38688	1.50016	1.24203	1.16584	1.19319	1.08351	1.40792	1.16124	1.15821	1.01126	0.719921	0.87695	0.836962	0.862912	0.833198	1.23499	1.35825	1.60465	1.70337	2.06927	1.77187	1.72682	2.1252	1.85395	1.71197	2.27941	1.66345	1.84491	1.91295	1.79169	2.00226	1.8548
			LR	1.66143	1.68321	1.74569	1.53629	1.61105	1.52584	1.42037	1.58487	1.44606	1.52585	1.54242	1.38055	1.27971	1.11382	1.29917	1.17642	1.24718	1.1784	1.37364	1.06949	1.18782	0.948198	1.19158	1.2479	1.00655	0.7277	0.607269	0.696329	1.03881	1.25398	1.40977	1.42766	1.54351	1.4706	1.6302	1.34927	1.43841	1.46736	1.50959	1.39115	1.29755	1.36464	1.57388	1.55029	1.50169	1.97869
			HL	1.60948	1.66825	1.57471	1.55813	1.70634	1.67413	1.51891	1.72206	1.44487	1.74135	1.80306	1.66231	1.71737	1.96796	1.83995	1.745	1.71595	1.29173	1.22322	1.47896	1.40009	1.01401	1.39274	1.20289	1.41316	1.21445	0.929649	0.857216	1.10552	1.17713	1.11183	1.43298	1.41793	1.26845	1.35384	1.04491	1.01808	1.41019	1.40302	1.36316	1.27985	1.37999	1.3006	1.5846	1.36325	1.34974
			LL	1.57746	1.87557	1.90118	1.81953	1.63602	1.8102	1.78368	1.93861	1.96881	1.46036	1.86571	1.6459	1.76977	1.63413	1.75144	1.65427	1.87377	1.68659	1.60466	1.57774	1.52779	1.51028	1.5869	1.56294	1.13461	0.821145	0.734125	1.02852	0.944709	1.02023	1.06736	1.02777	0.79367	1.28173	1.09375	0.933669	0.872196	1.28341	1.09681	1.17178	1.20473	1.36843	1.44186	1.62535	1.84212	2.07025
		p value (vs. HR)	HR vs. LR	0.714991	1	0.958247	0.230724	0.98607	0.623653	0.737842	0.859226	0.929806	0.9153	0.985936	0.712845	0.528306	0.887151	0.597039	0.729552	0.672543	0.986012	0.943059	0.724232	0.853955	0.985108	0.855591	0.884244	0.358166	0.985479	0.849679	0.923136	0.752685	0.569601	0.555802	0.76766	0.156302	1	0.576613	0.639581	1	0.724612	0.874708	0.567231	0.888542	0.688211	0.958406	0.781491	0.821216	0.575011
			HR vs. HL	0.861484	0.860142	0.648656	0.623626	0.902796	0.59494	0.944121	0.609465	0.722994	0.97126	0.718661	0.362504	1	0.702353	0.597127	0.64924	0.402667	0.694436	0.915821	0.312998	0.704645	0.740371	0.616973	0.765215	0.772276	0.868396	0.866631	0.722946	0.602389	0.569637	0.702305	0.499508	0.42602	0.884244	0.617031	0.49364	0.860856	0.599135	0.860198	0.699932	0.523488	0.646906	0.496294	0.578916	0.807015	0.337298
			HR vs. LL	0.701099	0.830344	0.725954	0.0975179	0.45586	0.42808	0.5492	1	0.614075	0.718661	0.971896	0.326048	0.623736	0.722951	0.780845	0.729596	0.929376	0.699842	0.776706	0.832564	0.524255	0.726464	0.827156	0.453161	0.484251	0.765277	1	0.572298	0.782768	0.704645	0.304752	0.835844	0.615898	0.495047	0.356621	0.884263	0.64997	0.929382	0.886426	0.754321	0.97205	0.861473	0.287648	0.727132	0.644943	0.561134
	Firing rate at middle stage
				Time bin
				1	2	3	4	5	6	7	8	9	10	11	12	13	14	15	16	17	18	19	20	21	22	23	24	25	26	27	28	29	30	31	32	33	34	35	36	37	38	39	40	41	42	43	44	45	46
	Trial type	Mean	HR	2.32707	3.05828	2.53459	2.49952	2.96788	3.0463	2.97879	3.98605	4.42242	4.01634	3.54339	3.80582	3.64494	3.83822	3.46335	3.80004	3.88163	3.89327	4.51309	5.24394	3.45344	5.04662	6.19056	4.00196	5.46247	6.79024	3.51168	1.27101	1.93737	1.21727	1.28985	0.995026	0.847674	1.23979	1.35408	1.44769	1.32073	1.45368	1.81067	2.13773	1.75892	2.41721	2.70738	2.23572	2.78936	3.68487
			LR	3.21857	3.44096	3.9872	3.70137	3.739	4.70144	4.15999	3.37092	3.49411	5.41975	4.95219	4.76768	5.44356	4.97417	5.19837	5.98245	5.02749	4.45208	5.08654	5.24361	5.84369	6.23714	6.44603	5.77538	5.70351	5.78081	2.90946	0.980147	1.19185	0.582786	0.59433	0.949425	1.0658	0.668645	0.947825	1.04054	1.42506	1.02137	1.24608	1.14133	1.45303	1.54003	1.60034	1.29914	1.32274	1.75364
			HL	7.49505	5.36597	5.5035	7.63636	7.58741	7.45542	6.00466	7.6317	7.50816	8.76923	7.97902	8.73514	9.01486	7.48485	7.03263	8.48572	7.08392	8.58741	5.95338	5.55245	7.58362	6.87179	6.29138	8.71562	13.3357	9.77389	3.65501	1.14685	0.685315	1.18182	1.34353	0.927739	1	0.931818	1.67308	1.26049	1.34441	1.48077	1.11742	1.29545	1.13549	0.829545	1.79458	1.39336	1.91521	1.53322
			LL	7.06193	6.22211	5.78172	5.58156	5.99781	5.9129	7.76402	7.29402	7.01215	7.32642	5.9707	7.40052	8.72841	7.88295	7.87903	6.38035	6.98718	7.7469	8.27839	7.47461	6.99301	8.13395	6.96643	10.2223	14.868	10.7984	3.2838	1.46853	0.891608	0.707269	0.713869	1.18881	1.56486	1.55868	1.52431	1.534	2.15392	1.59662	2.22147	1.90619	2.5261	2.29419	3.03209	3.62917	4.35731	6.38179
		s.e.m.	HR	1.12189	1.35375	1.03143	1.14657	1.17925	1.36068	1.4164	2.0777	2.13157	1.91598	1.98586	2.13117	1.85531	1.81655	2.03636	2.0266	1.74403	1.74477	2.16074	2.76817	1.72591	2.68112	3.32932	1.88844	2.90015	3.79613	1.50936	0.656878	0.718712	0.671295	0.707027	0.597696	0.499887	0.846649	0.735592	0.730476	0.49273	0.569246	0.79549	0.763724	0.56179	0.69089	0.677497	0.557107	0.705714	0.929453
			LR	1.38587	1.60089	1.80069	1.53729	1.78791	2.22833	1.9345	1.46804	1.52952	2.67501	2.31733	2.29384	2.54617	2.50695	2.6918	2.82628	2.32569	2.17705	2.20529	2.62524	2.68665	3.18216	3.14506	2.66391	2.80311	3.41428	1.29341	0.45023	0.551721	0.279933	0.243559	0.332704	0.366228	0.345547	0.436885	0.438559	0.55343	0.365138	0.453764	0.387188	0.441268	0.443412	0.622278	0.388102	0.55377	0.505215
			HL	4.13101	2.99004	3.35713	4.61945	4.73961	4.23288	3.92	4.53206	4.43168	5.52266	5.04977	5.34938	5.40252	5.21086	4.71728	5.20063	3.95621	5.02383	3.63092	2.91757	4.68869	4.3467	3.98401	5.36313	7.65896	5.36773	1.42162	0.62255	0.549385	0.998346	0.788581	0.722015	1	0.71992	0.908077	0.738054	0.820464	1.01493	0.894936	1.1759	0.581278	0.506288	0.895312	0.785901	0.740763	0.800787
			LL	3.98449	3.74004	2.96058	2.71308	3.4415	3.41684	4.48822	5.00794	4.56367	4.35809	3.81576	4.74925	5.05235	4.92051	4.66572	4.15273	3.93772	4.447	4.60205	4.45433	4.03863	4.77374	4.20677	6.47561	8.74446	6.16233	1.4791	0.856902	0.59548	0.49124	0.559186	0.698334	0.672181	0.832729	0.780778	0.620538	0.910188	0.728155	0.772958	0.851626	1.17869	1.39536	1.8155	1.90801	2.20334	2.84785
		p value (vs. HR)	HR vs. LR	0.261445	1	0.598844	0.893832	0.89296	0.842954	0.97353	0.79166	0.791543	0.509004	0.504466	0.894412	0.528527	0.893801	0.688883	0.444973	0.531353	0.945778	0.374008	0.595703	0.838235	0.467322	0.548136	0.920753	0.893801	0.86827	0.973546	0.946767	0.370314	0.54217	0.586162	0.406808	0.31658	0.972488	0.89374	0.838235	0.789535	0.840042	1	0.352993	0.690588	0.323952	0.15388	0.198725	0.0650548	0.087589
			HR vs. HL	0.590412	0.423146	0.189403	0.427783	0.315407	0.61384	0.973156	0.919614	0.458985	0.427783	0.801826	0.84129	0.973164	0.789475	0.312879	0.711271	0.866387	1	0.813836	0.730261	0.787715	0.351754	0.399781	0.540481	0.945778	0.715197	1	0.585821	0.0343313	0.182508	0.440206	0.160511	0.0271101	0.302185	0.836013	0.361519	0.399781	0.222817	0.261572	0.0140234	0.134599	0.0143515	0.135513	0.118664	0.235091	0.0145198
			HR vs. LL	0.593461	0.947317	0.618787	0.841336	0.946798	0.738649	1	0.522719	0.419184	0.893832	0.809288	0.500948	0.715276	0.711353	0.894472	0.711271	1	0.893832	0.946782	0.946343	0.839995	0.919566	0.893801	0.61384	1	0.738649	0.762004	0.586162	0.134363	0.451477	0.206436	0.512416	0.500821	0.944042	0.891741	0.946343	1	0.838331	0.3883	0.550336	1	0.219694	0.262804	0.766849	0.84357	0.511406
	Firing rate at late stage
				Time bin
				1	2	3	4	5	6	7	8	9	10	11	12	13	14	15	16	17	18	19	20	21	22	23	24	25	26	27	28	29	30	31	32	33	34	35	36	37	38	39	40	41	42	43	44	45	46
	Trial type	Mean	HR	1.189	1.12648	1.0661	1.22223	1.14076	1.2414	1.21376	1.26271	1.18148	1.30236	1.42073	1.38545	1.41177	1.42434	1.42514	1.40775	1.54551	1.50268	1.46953	1.60011	1.92509	1.61604	1.6934	1.60575	1.68819	1.59533	1.37909	1.46577	1.63617	1.7067	1.98941	2.0962	2.17498	2.34039	2.6844	3.12642	3.41525	3.97582	4.52568	5.73489	6.00077	6.54794	6.78369	6.70489	6.21343	6.18782
			LR	1.21203	1.39795	1.50049	1.19846	1.41862	1.4055	1.22907	1.15642	1.17758	1.2045	1.11099	1.27826	1.7674	0.995914	1.27263	1.3104	1.18946	1.34196	1.12478	1.92489	1.5908	1.60159	1.86184	1.82499	1.74683	1.33235	1.39242	2.00068	2.12344	2.21171	2.35613	2.07224	2.11876	2.30564	2.56749	2.30519	2.54362	2.85013	2.64302	2.89042	2.72089	3.18645	2.97455	3.23552	2.9101	2.74653
			HL	1.45475	1.56766	1.35022	1.53697	1.71815	1.42183	1.25033	1.51763	1.7693	1.2719	1.70066	1.89021	1.92927	1.45531	1.40007	1.41253	1.76074	1.46536	1.46945	2.07138	2.29757	2.20029	2.07399	2.29292	2.66941	1.83087	1.71573	1.71461	1.81432	2.16588	2.05539	1.88258	1.96573	2.04516	2.03865	2.0965	2.45345	1.5632	2.19099	1.61231	2.26484	2.67481	2.19731	1.70736	2.13965	2.05446
			LL	1.20482	1.02795	1.24552	1.17509	1.312	1.15444	1.29853	1.26351	1.31996	1.35518	1.27303	1.40022	1.46544	1.4634	1.37863	1.46441	1.58838	1.51968	1.64976	1.84625	1.77953	1.92682	1.84668	2.06125	2.14378	2.06515	2.03241	1.81923	1.8302	1.89027	2.14642	2.32531	2.37018	2.73403	3.10925	3.47866	4.2654	4.51304	4.75459	5.02458	5.14267	5.39972	5.87523	6.46796	6.74043	7.13504
		s.e.m.	HR	0.260908	0.237262	0.276787	0.290698	0.264137	0.27518	0.282053	0.282324	0.288489	0.301708	0.325387	0.304438	0.301511	0.312315	0.302219	0.320905	0.353512	0.345141	0.339242	0.360757	0.438775	0.380261	0.399481	0.384517	0.395322	0.368531	0.325381	0.348902	0.373502	0.422245	0.503735	0.538517	0.531249	0.588893	0.748742	0.906864	0.977095	1.1263	1.21272	1.41996	1.47467	1.56152	1.55268	1.42567	1.29074	1.22479
			LR	0.299723	0.370557	0.359929	0.400123	0.42359	0.403088	0.419038	0.361583	0.251195	0.334753	0.267508	0.33977	0.468515	0.262662	0.345467	0.380578	0.420516	0.361704	0.266982	0.519725	0.399126	0.397983	0.5147	0.470792	0.369395	0.363402	0.314959	0.472878	0.512987	0.586277	0.611062	0.568905	0.636845	0.649974	0.720495	0.729212	0.766896	0.772473	0.804463	0.806939	0.728465	0.840747	0.743681	0.821906	0.843203	0.752904
			HL	0.368394	0.391487	0.373074	0.41217	0.409825	0.366886	0.314593	0.393636	0.413037	0.322077	0.522531	0.536463	0.514615	0.46921	0.455333	0.325081	0.517953	0.387777	0.39948	0.599379	0.598165	0.544608	0.666676	0.600323	0.752636	0.656065	0.554353	0.544936	0.471682	0.600094	0.510594	0.476079	0.465067	0.548637	0.63223	0.541027	0.751629	0.433696	0.671181	0.425601	0.681596	0.695464	0.679809	0.683219	0.703805	0.524995
			LL	0.263153	0.23403	0.2808	0.265037	0.273754	0.251832	0.302554	0.29504	0.299771	0.305321	0.304445	0.367469	0.404176	0.370533	0.443546	0.41818	0.475239	0.456279	0.473994	0.534535	0.529387	0.53956	0.458998	0.615156	0.726093	0.653608	0.619247	0.609908	0.657234	0.629609	0.737192	0.782594	0.790658	0.844476	1.01285	1.16041	1.36378	1.4955	1.54515	1.58336	1.60121	1.54274	1.53692	1.44603	1.3839	1.37999
		p value (vs. HR)	HR vs. LR	0.0618105	0.359087	0.441646	0.0705873	0.0821632	0.163914	0.0314028	0.0729126	0.856835	0.050231	0.0808799	0.0200106	0.304176	0.0112529	0.00617623	0.0692951	0.00296367	0.0269345	0.0935621	0.238942	0.0396054	0.161296	0.627047	0.339645	0.557711	0.07826	0.322412	0.415278	0.377007	0.409777	0.733429	0.798964	0.324083	0.826538	0.90917	0.41236	0.239822	0.31207	0.0362293	0.0119298	0.0120466	0.000583932	4.11295e-05	0.000139142	1.45707e-06	1.45975e-07
			HR vs. HL	0.0603495	0.121956	0.0239383	0.0254968	0.149712	0.106592	0.0773641	0.0749311	0.753878	0.0502282	0.087555	0.0425802	0.122896	0.00241376	0.00150444	0.196259	0.0117568	0.0674039	0.0617936	0.0502539	0.112585	0.452681	0.0606814	0.310331	0.276695	0.101979	0.0612262	0.116141	0.179927	0.496526	0.962609	0.682873	0.704418	0.21815	0.205436	0.314864	0.0583528	0.000734019	0.000345748	0.00091521	0.000719898	0.000162422	7.56829e-07	2.66012e-09	7.49845e-08	4.99815e-08
			HR vs. LL	0.645912	0.82478	0.980187	0.693644	0.719014	0.890251	0.760803	0.75289	0.392043	0.871458	0.73908	0.494565	0.241428	0.588558	0.325285	0.860594	0.578205	0.241099	0.927621	0.694784	0.473356	0.684558	0.794943	0.915343	0.647032	0.983895	0.855993	0.550798	0.29408	0.461553	0.997826	0.841637	0.743616	0.884923	0.764462	0.919399	0.772245	0.316967	0.123095	0.236121	0.205369	0.119931	0.214927	0.614224	0.844962	0.85252
	ROC value at early stage
				Time bin
				1	2	3	4	5	6	7	8	9	10	11	12	13	14	15	16	17	18	19	20	21	22	23	24	25	26	27	28	29	30	31	32	33	34	35	36	37	38	39	40	41	42	43	44	45	46
	Trial types compared Trials compared Trials compired	Mean	HR vs. HL	0.504346	0.514854	0.505168	0.502077	0.498265	0.507384	0.496176	0.501883	0.500681	0.494561	0.506778	0.491423	0.471915	0.489528	0.49475	0.508241	0.515529	0.508446	0.517349	0.507257	0.526513	0.533057	0.544046	0.5685	0.578579	0.586715	0.598242	0.635566	0.661766	0.701399	0.694878	0.686068	0.693515	0.698868	0.68418	0.68341	0.670361	0.663191	0.628071	0.631564	0.64355	0.630882	0.634505	0.626373	0.637258	0.610251
			HR vs. LR	0.501131	0.509517	0.51286	0.507825	0.503277	0.506587	0.504707	0.506592	0.499731	0.495194	0.507356	0.499931	0.492076	0.501669	0.495739	0.498513	0.505967	0.505311	0.519121	0.504784	0.512316	0.519698	0.524402	0.548252	0.563065	0.573528	0.604992	0.649019	0.678099	0.698568	0.700195	0.682817	0.700245	0.685005	0.68116	0.6843	0.673293	0.673136	0.644489	0.637815	0.66139	0.645072	0.652758	0.636179	0.649215	0.618902
			HR vs. LL	0.499161	0.511487	0.507014	0.505881	0.495696	0.504775	0.480903	0.495519	0.488481	0.488686	0.495334	0.481458	0.475025	0.488623	0.496337	0.517247	0.525777	0.51556	0.50617	0.499841	0.514237	0.519059	0.513735	0.517591	0.50958	0.517352	0.515738	0.520645	0.506022	0.52962	0.497057	0.504254	0.50941	0.494396	0.499592	0.4857	0.482794	0.505683	0.45717	0.482161	0.501874	0.483172	0.502537	0.505551	0.51121	0.492889
		s.e.m.	HR vs. HL	0.00666372	0.00817563	0.00533971	0.00879956	0.0104602	0.00952062	0.0106616	0.0135445	0.0121792	0.00959329	0.0114691	0.0146636	0.0221433	0.0131248	0.0105778	0.00927764	0.0148009	0.0138083	0.0203197	0.0179063	0.0158802	0.0178042	0.0160453	0.0204782	0.020788	0.0263216	0.0317171	0.0325527	0.0369104	0.0380578	0.035427	0.0337198	0.033826	0.037416	0.0423959	0.0404839	0.0376087	0.0441702	0.041767	0.0333251	0.0373311	0.0367901	0.0357144	0.0356131	0.0364746	0.0343034
			HR vs. LR	0.00470365	0.00621616	0.00601513	0.00689927	0.00561541	0.00469574	0.00908699	0.00695678	0.00788992	0.00483273	0.0083577	0.00929795	0.00882686	0.00364202	0.00717842	0.0102844	0.00921126	0.0097222	0.0151102	0.0124345	0.0125533	0.0150969	0.0157819	0.0183194	0.022254	0.0222486	0.0280569	0.0282059	0.0327862	0.0343841	0.0319692	0.0339449	0.0330731	0.0392351	0.0396112	0.0362029	0.0325199	0.0394282	0.0385086	0.0319557	0.0338665	0.0362838	0.0328456	0.0336894	0.0312227	0.0304824
			HR vs. LL	0.00730844	0.00995548	0.00655018	0.0062357	0.0108965	0.0117286	0.0119476	0.0131798	0.0156948	0.0119772	0.0149683	0.0181779	0.0129569	0.0114295	0.00559689	0.0108664	0.0173463	0.0145739	0.0237096	0.0204803	0.0151001	0.0141947	0.0111065	0.00776977	0.0145499	0.0167562	0.0203768	0.0150372	0.0194718	0.0204241	0.0200001	0.0165789	0.016778	0.0179424	0.015411	0.0181043	0.0148444	0.01672	0.0209465	0.0280641	0.0221763	0.016057	0.0180401	0.0159661	0.0202996	0.0222367
		p value (vs. HR)	HR vs. HL	0.351685	0.153076	0.599487	0.951538	0.946045	0.677246	0.760864	0.934082	0.850098	0.71729	0.850098	0.425781	0.365234	1	0.663086	0.748291	0.877686	0.855225	0.917632	0.714844	0.187622	0.133665	0.0199502	0.00320459	0.00118231	0.00264735	0.0129334	0.00193099	0.00118419	0.00100188	0.000845855	0.000845855	0.000712627	0.00050263	0.00226334	0.00264735	0.00118419	0.00648249	0.0191173	0.00270771	0.00418387	0.00748178	0.00270771	0.00485323	0.00418387	0.016822
			HR vs. LR	0.892578	0.135254	0.0209961	0.310547	0.946045	0.223389	0.304932	0.148804	0.892578	0.58252	0.591797	0.898438	0.637695	0.84375	0.774902	0.769531	0.825439	0.684814	0.541748	0.534857	0.583008	0.223755	0.178223	0.0129334	0.00648997	0.00359936	0.0035806	0.000350861	0.000351533	0.000351533	0.000351533	0.000598058	0.00050263	0.00100024	0.000845855	0.00050263	0.000351533	0.0005301	0.00163905	0.0013462	0.000712627	0.00226334	0.000598058	0.00164401	0.00050263	0.00309008
			HR vs. LL	0.846924	0.193726	0.589844	0.951538	0.541748	0.923035	0.120544	0.803955	0.216553	0.658325	0.216309	0.297119	0.0839844	0.625	0.469727	0.0522461	0.575439	0.635498	0.761536	0.463135	0.454285	0.118896	0.243896	0.0553589	0.463107	0.246137	0.434756	0.118199	0.83131	0.331832	0.794586	0.463107	0.652918	0.905794	0.722563	0.355959	0.308788	0.83131	0.0312493	1	0.83131	0.722563	0.876722	0.83131	0.554034	0.722563
	ROC value at middle stage
				Time bin
				1	2	3	4	5	6	7	8	9	10	11	12	13	14	15	16	17	18	19	20	21	22	23	24	25	26	27	28	29	30	31	32	33	34	35	36	37	38	39	40	41	42	43	44	45	46
	Trial types compared Trials compared Trials compired	Mean	HR vs. HL	0.465882	0.468544	0.464117	0.457176	0.463229	0.456232	0.465172	0.459361	0.464524	0.498238	0.477962	0.490897	0.43709	0.494305	0.519182	0.50489	0.506998	0.497747	0.503051	0.532568	0.54228	0.53286	0.550228	0.591784	0.65086	0.64874	0.663299	0.68083	0.691294	0.709879	0.696597	0.695087	0.695778	0.689123	0.677165	0.664853	0.658923	0.661185	0.655237	0.662515	0.65701	0.665434	0.652932	0.659434	0.648357	0.648707
			HR vs. LR	0.485521	0.470054	0.474103	0.48308	0.488869	0.469706	0.481715	0.459729	0.488272	0.485579	0.467346	0.471094	0.503384	0.508593	0.518399	0.50057	0.502129	0.514651	0.507525	0.522536	0.518149	0.534219	0.560524	0.600655	0.649592	0.665276	0.688496	0.689925	0.716577	0.707493	0.712544	0.705991	0.711383	0.700257	0.696906	0.691808	0.688153	0.680144	0.678887	0.665046	0.662036	0.672976	0.666398	0.651881	0.645944	0.654106
			HR vs. LL	0.465159	0.459439	0.470195	0.457869	0.4749	0.464924	0.454522	0.4616	0.467903	0.475371	0.472669	0.476855	0.438753	0.494775	0.52026	0.503309	0.479538	0.497047	0.489006	0.488918	0.491296	0.479889	0.462152	0.475712	0.489636	0.491589	0.509163	0.525216	0.550523	0.537904	0.554349	0.52644	0.54311	0.529682	0.515703	0.529402	0.504126	0.513062	0.513907	0.520116	0.528702	0.529375	0.544793	0.507924	0.538875	0.513264
		s.e.m.	HR vs. HL	0.025122	0.0276374	0.0325542	0.0227856	0.0308907	0.0271205	0.029525	0.0309853	0.0333905	0.0134479	0.0302426	0.0263422	0.0315982	0.0168345	0.0133432	0.00520654	0.00550903	0.0126727	0.0172577	0.0170186	0.0131729	0.0222375	0.0225363	0.0278759	0.0396465	0.0472396	0.0481531	0.0498232	0.0521041	0.048709	0.0573853	0.0581251	0.0518965	0.0549906	0.0573753	0.0574072	0.0573029	0.0503929	0.0513737	0.0446478	0.0476709	0.0436057	0.0488646	0.0446151	0.0448692	0.0430923
			HR vs. LR	0.0103296	0.0141428	0.0120721	0.00890645	0.00801195	0.0245723	0.0156363	0.0182205	0.011025	0.0138421	0.0142966	0.00910199	0.00991676	0.0111668	0.00781345	0.00860022	0.00919741	0.0115148	0.00798735	0.0117161	0.0131899	0.0187836	0.0230453	0.0324512	0.0386461	0.0449318	0.0444941	0.0493501	0.047534	0.0462478	0.0500837	0.0533873	0.0500431	0.05219	0.0485838	0.0521426	0.0473201	0.0447751	0.0475434	0.0452045	0.0441652	0.0448929	0.0443618	0.0448237	0.0471103	0.0417412
			HR vs. LL	0.0250723	0.0225278	0.0244317	0.0261181	0.0235735	0.0215934	0.0327129	0.0217317	0.0273192	0.0236633	0.0221772	0.0299909	0.0347864	0.0144117	0.0105562	0.0041985	0.00992402	0.00933554	0.0172492	0.0253632	0.0330351	0.033053	0.0344943	0.0367248	0.0284978	0.0184758	0.0110811	0.0148906	0.0247039	0.0252075	0.0247237	0.0250525	0.0313766	0.0273496	0.0332782	0.0341696	0.0354691	0.0283464	0.0246475	0.0219337	0.0177838	0.0248824	0.0176596	0.0191759	0.0172001	0.0243573
		p value (vs. HR)	HR vs. HL	0.507812	0.675781	1	0.0839844	0.921875	0.34375	0.577148	0.700195	0.275391	0.652344	0.820312	0.632812	0.0546875	0.496094	0.203125	0.238281	0.179688	0.945312	0.546875	0.130859	0.00683594	0.0839844	0.0537109	0.00976562	0.00292969	0.00488281	0.00683594	0.000976562	0.000976562	0.000976562	0.00488281	0.000976562	0.000976562	0.0136719	0.00976562	0.0273438	0.0322266	0.00683594	0.000976562	0.000976562	0.000976562	0.000976562	0.00976562	0.00390625	0.00195312	0.00292969
			HR vs. LR	0.320312	0.0839844	0.0390625	0.0507812	0.425781	0.322266	0.320312	0.0322266	0.413086	0.101562	0.0390625	0.00390625	0.519531	0.921875	0.0742188	0.845703	0.570312	0.322266	0.764648	0.240234	0.320312	0.123047	0.00488281	0.00292969	0.00195312	0.000976562	0.000976562	0.000976562	0.00195312	0.000976562	0.000976562	0.00292969	0.00195312	0.00195312	0.000976562	0.00292969	0.000976562	0.00292969	0.00195312	0.000976562	0.00195312	0.00195312	0.00195312	0.00292969	0.00292969	0.000976562
			HR vs. LL	0.431641	0.275391	0.921875	0.203125	1	0.25	0.577148	0.275391	0.413086	0.556641	0.300781	0.910156	0.109375	0.820312	0.160156	0.556641	0.0390625	0.492188	1	1	0.831055	0.764648	0.464844	0.831055	0.898438	1	0.464844	0.123047	0.0322266	0.123047	0.0830078	0.464844	0.0673828	0.365234	0.464844	0.700195	0.831055	0.637695	0.898438	0.519531	0.206055	0.365234	0.0273438	0.845703	0.0371094	0.700195
	ROC value at late stage
				Time bin
				1	2	3	4	5	6	7	8	9	10	11	12	13	14	15	16	17	18	19	20	21	22	23	24	25	26	27	28	29	30	31	32	33	34	35	36	37	38	39	40	41	42	43	44	45	46
	Trial types compared Trials compared Trials compired	Mean	HR vs. HL	0.493675	0.498603	0.491875	0.49778	0.491669	0.497703	0.50307	0.504595	0.503757	0.501001	0.485868	0.496902	0.492018	0.496443	0.494977	0.495805	0.502142	0.505874	0.524963	0.550228	0.557576	0.590805	0.584462	0.577251	0.580791	0.590527	0.581398	0.579401	0.570665	0.569853	0.560073	0.559979	0.561724	0.554886	0.55973	0.566027	0.573987	0.554958	0.568839	0.565046	0.562204	0.563861	0.566874	0.562848	0.567877	0.570858
			HR vs. LR	0.495927	0.496448	0.495307	0.500647	0.495323	0.506904	0.495165	0.504476	0.511815	0.498801	0.501549	0.494711	0.500217	0.491554	0.489299	0.490796	0.500926	0.510222	0.517537	0.535449	0.554362	0.562099	0.572265	0.574059	0.574957	0.577934	0.565097	0.5554	0.561963	0.55659	0.556821	0.554374	0.55068	0.550207	0.558155	0.559241	0.56193	0.562474	0.563191	0.557542	0.561064	0.562779	0.561011	0.560635	0.564261	0.5615
			HR vs. LL	0.501484	0.499411	0.498332	0.499365	0.495244	0.500706	0.500262	0.502993	0.503147	0.497717	0.501636	0.496233	0.492209	0.49083	0.501294	0.501998	0.502058	0.499392	0.497726	0.513245	0.522144	0.512668	0.495969	0.490426	0.492975	0.5124	0.508777	0.501947	0.501261	0.499817	0.494732	0.488384	0.485152	0.488453	0.494796	0.501431	0.499407	0.506213	0.501905	0.49961	0.498923	0.502334	0.497841	0.501829	0.501319	0.502217
		s.e.m.	HR vs. HL	0.00659357	0.00694675	0.00663732	0.00542243	0.00716173	0.00777656	0.00608592	0.0060686	0.00845118	0.00780629	0.00979141	0.00934291	0.00807327	0.00881124	0.0065746	0.00695092	0.00644872	0.0108443	0.0120798	0.0147247	0.0182821	0.0180107	0.0174302	0.0177327	0.0166226	0.0167812	0.0157426	0.0151196	0.0143307	0.014735	0.0159017	0.0139707	0.0164361	0.0150212	0.0152616	0.0141754	0.0141587	0.015881	0.013331	0.0141709	0.0143762	0.014229	0.0151352	0.0150577	0.013193	0.0126736
			HR vs. LR	0.00435496	0.00524847	0.00495385	0.00433277	0.00436165	0.00544299	0.00656418	0.00474635	0.00610018	0.00632494	0.00658343	0.0067926	0.00739936	0.00651343	0.01001	0.00989286	0.0103715	0.0106141	0.0132034	0.0136436	0.0163704	0.0173974	0.0165192	0.0166244	0.0167836	0.0172174	0.0176395	0.0171397	0.0152633	0.0148262	0.0151586	0.0145166	0.0157973	0.0146231	0.0147302	0.014215	0.0144037	0.0154255	0.0142555	0.0153038	0.0138312	0.014139	0.0146363	0.0143575	0.0146141	0.0135638
			HR vs. LL	0.00327853	0.00392571	0.00385379	0.00396649	0.00455414	0.00515711	0.00528724	0.00555036	0.00595896	0.00643006	0.00641766	0.00682693	0.00807927	0.00859264	0.00794736	0.00797646	0.00834594	0.00771915	0.0115594	0.0131639	0.0142402	0.0116837	0.0107672	0.010661	0.0115828	0.0101573	0.0106207	0.0101845	0.00855054	0.00699702	0.00650225	0.00561697	0.00556818	0.00528976	0.0064936	0.00546478	0.00570159	0.00587654	0.00688433	0.00623296	0.00636021	0.00616468	0.00698738	0.00600109	0.00620542	0.0061578
		p value (vs. HR)	HR vs. HL	0.627081	0.727154	0.676892	0.609496	0.768117	0.700741	0.0727343	0.0246435	0.152586	0.149635	0.798404	0.688673	0.864244	0.31269	0.764785	0.313489	0.765483	0.557732	0.00468284	0.000208789	0.00118054	1.04729e-06	3.25045e-06	1.51454e-06	8.91685e-07	1.18839e-06	3.20603e-07	1.08074e-06	2.46729e-06	1.35422e-05	0.000159591	7.17032e-05	0.00010863	0.000455382	7.56399e-05	8.48977e-06	3.80862e-07	0.000648133	5.77641e-07	3.8175e-05	3.50876e-05	1.20059e-05	1.18857e-05	2.79e-05	1.01107e-06	1.42748e-07
			HR vs. LR	0.743396	0.21092	0.980731	0.280339	0.480022	0.148686	0.714357	0.109559	0.00232888	0.95866	0.797677	0.388801	0.22073	0.464069	0.711515	0.262962	0.463858	0.875773	0.395013	0.00798219	0.000480668	4.2935e-05	7.32451e-07	9.13354e-07	2.52153e-07	1.34236e-06	1.80871e-05	4.6323e-05	9.822e-06	0.000128864	4.57459e-05	0.000377786	0.000835229	0.00115254	0.000172332	0.00026543	0.00013039	0.000257755	1.48144e-05	0.00164927	9.11788e-05	2.49797e-05	0.000251572	0.00021687	3.02889e-05	2.32425e-05
			HR vs. LL	0.68161	0.958883	0.9202	0.598041	0.558876	0.253578	0.128967	0.0171043	0.0335878	0.543986	0.391083	0.818523	0.363528	0.645258	0.100636	0.576599	0.501504	0.451602	0.326088	0.0622864	0.0154357	0.0588731	0.461756	0.702385	0.835766	0.185461	0.319037	0.551718	0.4232	0.871341	0.367352	0.0511606	0.0114755	0.0237733	0.597251	1	0.837438	0.457554	0.575384	0.930355	0.326474	0.825683	0.665502	0.747977	0.206103	0.636723
	Licking rate at early stage
				Time bin
				1	2	3	4	5	6	7	8	9	10	11	12	13	14	15	16	17	18	19	20	21	22	23	24	25	26	27	28	29	30	31	32	33	34	35	36	37	38	39	40	41	42	43	44	45	46
	Trial type	Mean	HR	0.0759013	0.151803	0.151803	0.0718583	0.0759013	0	0.103186	0.152896	0	0	0.0759013	0.0759013	0.0356506	0	0	0	0.0759013	0	0	0	0	0	0	0	0	0	0	0	0	0	0	0.0678733	0	0	0	0	0.256441	0.243714	1.04873	1.14568	2.8517	3.12532	2.64805	3.14523	3.45957	4.16734
			LR	0	0.0542986	0	0	0	0.0653595	0	0.0759013	0	0.0759013	0.141261	0.0653595	0.0759013	0	0.0759013	0	0	0	0	0	0	0	0	0	0	0	0	0	0	0	0	0	0	0	0	0.0759013	0.0759013	0.0759013	0.282003	0.303605	0.724906	1.21301	0.792293	0.757602	1.0632	1.08991
			HL	0	0	0.0196078	0	0.174292	0	0	0	0	0	0	0	0	0	0	0	0	0	0	0	0	0	0	0	0	0	0	0	0	0	0	0	0	0	0	0	0.697168	1.04575	0.348584	0.348584	0.893246	0.522876	0.915033	0.762527	0.544662	1.83007
			LL	0	0	0.174292	0	0.174292	0.174292	0.174292	0	0	0	0	0	0.174292	0	0	0	0	0	0	0	0	0	0	0	0	0	0	0	0	0	0	0	0	0.174292	0	0.522876	0.87146	0.466231	1.60784	0.607927	1.95366	1.55472	2.49416	3.08675	3.89372	3.59013
		s.e.m.	HR	0.0342083	0.0684165	0.0684165	0.0554501	0.0342083	0	0.0569923	0.0712604	0	0	0.0342083	0.0342083	0.0356506	0	0	0	0.0342083	0	0	0	0	0	0	0	0	0	0	0	0	0	0	0.0366558	0	0	0	0	0.0712647	0.106698	0.28309	0.316772	0.531802	0.32121	0.558093	0.58368	0.576845	0.658923
			LR	0	0.0293246	0	0	0	0.0653595	0	0.0342083	0	0.0342083	0.0694403	0.0653595	0.0342083	0	0.0342083	0	0	0	0	0	0	0	0	0	0	0	0	0	0	0	0	0	0	0	0	0.0342083	0.0342083	0.0342083	0.0992284	0.136833	0.208359	0.358193	0.264257	0.236325	0.323215	0.34359
			HL	0	0	0.0196078	0	0.0785523	0	0	0	0	0	0	0	0	0	0	0	0	0	0	0	0	0	0	0	0	0	0	0	0	0	0	0	0	0	0	0	0.314209	0.471314	0.157105	0.157105	0.304719	0.235657	0.273418	0.307047	0.165384	0.546837
			LL	0	0	0.0785523	0	0.0785523	0.0785523	0.0785523	0	0	0	0	0	0.0785523	0	0	0	0	0	0	0	0	0	0	0	0	0	0	0	0	0	0	0	0	0.0785523	0	0.235657	0.392762	0.182747	0.702607	0.190736	0.488524	0.349433	0.52853	0.505174	0.867167	0.55679
	Licking rate at middle stage
				Time bin
				1	2	3	4	5	6	7	8	9	10	11	12	13	14	15	16	17	18	19	20	21	22	23	24	25	26	27	28	29	30	31	32	33	34	35	36	37	38	39	40	41	42	43	44	45	46
	Trial type	Mean	HR	0	0	0	0	0	0	0	0.094451	0	0	0	0	0	0	0	0	0	0	0	0	0	0	0	0	0	0	0	0	0	0	0	0	0	0	0.139365	0.154083	0.308166	0.523883	0.679967	1.05177	0.955316	1.21239	2.49517	3.72556	3.05546	4.09905
			LR	0	0	0	0.0395257	0	0	0	0	0	0	0	0	0	0	0	0	0	0	0	0	0	0	0	0	0	0	0	0	0	0	0	0	0	0	0	0	0	0	0	0	0	0.11544	0.23088	0.350044	0.34632	0.465484
			HL	0	0	0	0	0	0	0	0	0	0	0	0	0	0	0	0	0	0	0	0	0	0	0	0	0	0	0	0	0	0	0	0	0	0	0	0	0	0	0	0	0	0	0	0	0	0.363636
			LL	0	0	0	0	0	0	0	0	0	0	0	0	0	0	0	0	0	0	0	0	0	0	0	0	0	0	0	0	0	0	0	0	0	0	0	0	0	0.079389	0.358761	0.44944	1.78859	2.96966	1.9226	2.29751	3.68958	2.9918
		s.e.m.	HR	0	0	0	0	0	0	0	0.0395117	0	0	0	0	0	0	0	0	0	0	0	0	0	0	0	0	0	0	0	0	0	0	0	0	0	0	0.0484006	0.154083	0.308166	0.523883	0.543804	0.847457	0.955316	0.616673	0.636375	0.823872	0.744222	0.988692
			LR	0	0	0	0.0395257	0	0	0	0	0	0	0	0	0	0	0	0	0	0	0	0	0	0	0	0	0	0	0	0	0	0	0	0	0	0	0	0	0	0	0	0	0	0.0482921	0.0965841	0.0809161	0.144876	0.0901512
			HL	0	0	0	0	0	0	0	0	0	0	0	0	0	0	0	0	0	0	0	0	0	0	0	0	0	0	0	0	0	0	0	0	0	0	0	0	0	0	0	0	0	0	0	0	0	0.15212
			LL	0	0	0	0	0	0	0	0	0	0	0	0	0	0	0	0	0	0	0	0	0	0	0	0	0	0	0	0	0	0	0	0	0	0	0	0	0	0.053394	0.121318	0.251863	0.18316	0.554574	0.626545	0.420967	0.475636	0.813595
	Licking rate at late stage
				Time bin
				1	2	3	4	5	6	7	8	9	10	11	12	13	14	15	16	17	18	19	20	21	22	23	24	25	26	27	28	29	30	31	32	33	34	35	36	37	38	39	40	41	42	43	44	45	46
	Trial type	Mean	HR	0	0.0625	0	0	0	0	0	0	0	0.0297619	0	0	0	0	0	0	0	0	0	0	0	0	0	0	0	0	0	0	0	0	0	0	0	0	0.03125	0.396739	0.865045	1.651	3.17856	4.05121	5.16398	5.11935	7.3222	7.43301	7.43509	8.19477
			LR	0	0.148026	0	0	0	0	0	0	0	0	0	0	0	0.148026	0.148026	0	0	0	0	0	0	0	0	0	0	0	0	0	0	0	0	0	0	0	0	0	0	0.111607	0.208333	0	0	0.0625	0.208333	0.432428	0.270833	0.431548
			HL	0.0167625	0.0167625	0.0167625	0.0167625	0.0167625	0.0167625	0.0167625	0.0167625	0.0167625	0.0167625	0.0167625	0.0167625	0.0167625	0.0167625	0.0167625	0.0167625	0.0167625	0.0167625	0.0167625	0.0167625	0.0167625	0.0167625	0.0167625	0.0167625	0.0167625	0.0167625	0.0167625	0.0167625	0.0167625	0.0167625	0.0167625	0.0167625	0.0167625	0.0167625	0.0167625	0.0167625	0.0167625	0.0167625	0.0167625	0.0167625	0.0167625	0.0167625	0.0167625	0.579262	0.0167625	0.251137
			LL	0.0743349	0.0280449	0.0396127	0.0280449	0.0280449	0.0405093	0	0	0	0.0676575	0.0280449	0	0.0280449	0.0280449	0.0396127	0.0280449	0	0.0280449	0	0	0	0	0	0	0	0	0	0	0	0	0	0	0	0	0.143779	0.223024	0.605694	1.92445	2.30081	3.78372	4.33663	5.73309	5.48807	6.94121	6.82694	6.98453
		s.e.m.	HR	0	0.0224697	0	0	0	0	0	0	0	0.00992063	0	0	0	0	0	0	0	0	0	0	0	0	0	0	0	0	0	0	0	0	0	0	0	0	0.0112349	0.0775907	0.13859	0.207289	0.363413	0.482088	0.453653	0.322014	0.463511	0.375343	0.40833	0.396275
			LR	0	0.046103	0	0	0	0	0	0	0	0	0	0	0	0.046103	0.046103	0	0	0	0	0	0	0	0	0	0	0	0	0	0	0	0	0	0	0	0	0	0	0.0483017	0.0546386	0	0	0.0224697	0.0546386	0.0682821	0.0554699	0.120481
			HL	0.00602637	0.00602637	0.00602637	0.00602637	0.00602637	0.00602637	0.00602637	0.00602637	0.00602637	0.00602637	0.00602637	0.00602637	0.00602637	0.00602637	0.00602637	0.00602637	0.00602637	0.00602637	0.00602637	0.00602637	0.00602637	0.00602637	0.00602637	0.00602637	0.00602637	0.00602637	0.00602637	0.00602637	0.00602637	0.00602637	0.00602637	0.00602637	0.00602637	0.00602637	0.00602637	0.00602637	0.00602637	0.00602637	0.00602637	0.00602637	0.00602637	0.00602637	0.00602637	0.174439	0.00602637	0.091325
			LL	0.0155726	0.0100826	0.0123374	0.0100826	0.0100826	0.0145637	0	0	0	0.0147852	0.0100826	0	0.0100826	0.0100826	0.0123374	0.0100826	0	0.0100826	0	0	0	0	0	0	0	0	0	0	0	0	0	0	0	0	0.0350264	0.0518393	0.0951861	0.187917	0.193746	0.308933	0.256117	0.29435	0.305632	0.301872	0.324618	0.206072
[truncated: 94 more columns]

## Sheet: Fig. 6G
Fig. 6G	Data	Averaged firing rate for 5 s after the FL in the HR trial of pVLS neurons
	Group	Number of FL-HR neurons in the pVLS; 17, 11, and 64 neurons for early, middle, and late stages, respectively.
	Softwear	matlab ver 2019
	Dependent variable	Firing rate (Hz)
	Stats	Kruskalwallis test; HR trial, χ2 = 7.651619254899461, p = 0.021800777875752 post hoc Tukey–Kramer test; early vs. middle; p = 0.974888957622083 early vs. late; p = 0.076308878902419 middle vs. late; p = 0.096324399265194
			Firing rate
	Learning stage	early	8.3
		early	2.95152
		early	1.10645
		early	2.77419
		early	5.8
		early	2.00323
		early	6.68235
		early	9.47059
		early	3.42353
		early	15.8706
		early	32.3731
		early	6.85385
		early	1.98462
		early	2.8
		early	15.1183
		early	0.95493
		early	4.47324
		middle	1.88475
		middle	9.87931
		middle	9.82373
		middle	0.581818
		middle	12.4468
		middle	6.40779
		middle	2.76623
		middle	6.42985
		middle	11.3254
		middle	3.3403
		middle	3.91642
		late	0.0878049
		late	3.21928
		late	2.01446
		late	0.162963
		late	6.41429
		late	7.00238
		late	8.24524
		late	7.22381
		late	11.0786
		late	2.74286
		late	0.466667
		late	0.25
		late	1.82588
		late	3.68471
		late	12.5859
		late	4.23294
		late	0.169412
		late	0.635294
		late	1.70824
		late	4.45412
		late	0.331765
		late	2.17079
		late	3.74382
		late	11.6337
		late	3.83146
		late	0.546067
		late	0.191011
		late	0.0786517
		late	5.08286
		late	3.01714
		late	0.448571
		late	4.35143
		late	3.8
		late	0.271429
		late	2.39714
		late	2.83529
		late	3.53824
		late	2.33824
		late	1.01471
		late	10.4559
		late	0.470588
		late	0.901449
		late	3.45797
		late	5.23188
		late	1.2058
		late	0.907246
		late	6.47536
		late	3.90725
		late	4.10725
		late	1.71014
		late	0.344928
		late	0.715942
		late	12.0725
		late	3.53067
		late	0.402667
		late	1.032
		late	9.63467
		late	2.07467
		late	7.87901
		late	2.71852
		late	4.38519
		late	2.42716
		late	6.45432
		late	7.76296

## Sheet: Fig. 6H
Fig. 6H	Data	Averaged total number of time bins above 3 S.D. of the baseline firing for 5 s after the FL in the HR trial of pVLS neurons
	Group	Number of FL-HR neurons in the pVLS; 17, 11, and 64 neurons for early, middle, and late stages, respectively.
	Softwear	matlab ver 2019
	Dependent variable	Number of bins
	Stats	Kruskalwallis test; HR trial, χ2 = 0.023112747115086, p = 0.988510144843620
			Total number of time bins
	Learning stage	early	0
		early	0
		early	24
		early	3
		early	70
		early	20
		early	81
		early	100
		early	83
		early	45
		early	0
		early	70
		early	10
		early	33
		early	60
		early	0
		early	0
		middle	33
		middle	28
		middle	91
		middle	7
		middle	26
		middle	20
		middle	0
		middle	0
		middle	73
		middle	31
		middle	0
		late	1
		late	9
		late	96
		late	3
		late	100
		late	15
		late	8
		late	14
		late	0
		late	11
		late	4
		late	3
		late	8
		late	47
		late	97
		late	12
		late	14
		late	13
		late	32
		late	5
		late	1
		late	3
		late	91
		late	84
		late	14
		late	2
		late	10
		late	5
		late	32
		late	86
		late	15
		late	75
		late	74
		late	23
		late	1
		late	58
		late	46
		late	10
		late	8
		late	47
		late	22
		late	16
		late	73
		late	62
		late	0
		late	3
		late	50
		late	60
		late	75
		late	12
		late	6
		late	14
		late	80
		late	89
		late	21
		late	6
		late	98
		late	20
		late	0
		late	0
		late	0
		late	27
		late	1
		late	0

## Sheet: Fig. 6I
Fig. 6I	Data	Cumulative probability of the proportion of FL-HR neurons in the pVLS at the early, middle, and late stages
	Group	Number of FL-HR neurons in the pVLS; 17, 11, and 64 neurons for early, middle, and late stages, respectively.
	Softwear	matlab ver 2019
	Dependent variable	Calculated number of event-related neurons
	Stats	Kruskalwallis test; χ2 = 47.9220, p = 0.0000000000392530591136018 post hoc Tukey–Kramer test; early vs. middle; p = 0.011345067776993 early vs. late; p = 0.000173315111235528 middle vs. late; p = 0.000000000971895897095009
			Cumulative probability of the proportion
	Learning stage	early	9.58904
		early	10.9589
		early	9.58904
		early	9.58904
		early	8.21918
		early	10.9589
		early	10.9589
		early	9.58904
		early	10.9589
		early	9.58904
		early	10.9589
		early	10.9589
		early	12.3288
		early	10.9589
		early	8.21918
		early	8.21918
		early	8.21918
		early	10.9589
		early	12.3288
		early	9.58904
		middle	7.27273
		middle	7.27273
		middle	10
		middle	9.09091
		middle	8.18182
		middle	7.27273
		middle	10
		middle	8.18182
		middle	10
		middle	7.27273
		middle	9.09091
		middle	8.18182
		middle	8.18182
		middle	9.09091
		middle	8.18182
		middle	8.18182
		middle	7.27273
		middle	7.27273
		middle	8.18182
		middle	7.27273
		late	25.2632
		late	24.7368
		late	23.6842
		late	25.2632
		late	26.8421
		late	25.7895
		late	25.2632
		late	24.2105
		late	23.6842
		late	23.1579
		late	24.7368
		late	24.2105
		late	24.2105
		late	24.2105
		late	24.7368
		late	25.7895
		late	24.7368
		late	24.7368
		late	25.2632
		late	25.7895

## Sheet: Fig. 6J
Fig. 6J	Data	Distribution of the correlation coefficient between the numbers of spikes of pVLS FL-HR neurons and licking
	Group	Number of FL-HR neurons in the pVLS; 17, 11, and 64 neurons for early, middle, and late stages, respectively.
	Softwear	matlab ver 2019
	Dependent variable
	Stats	Pearson's linear correlation coefficient;
			r	p value
	# of neurons	1	0.234651	0.150468
		2	0.222756	0.0928169
		3	0.332421	0.208401
		4	0.0141801	0.900014
		5	-0.0466375	0.752938
		6	-0.117889	0.440551
		7	-0.500211	0.0484703
		8	-0.273482	0.167497
		9	0.17601	0.226381
		10	0.10244	0.529349
		11	0.0576314	0.684874
		12	0.0531311	0.692027
		13	-0.0597469	0.60574
		14	0.0316916	0.78158
		15	0.00808781	0.943973
		16	-0.132682	0.246855
		17	-0.0520435	0.657447
		18	0.034549	0.77326
		19	-0.0273534	0.876051
		20	0.0796182	0.795981
		21	-0.0410827	0.717483
		22	-0.0921558	0.413212
		23	0.0886153	0.459164
		24	0.0301493	0.784154
		25	0.0436768	0.839412
		26	-0.169055	0.204579
		27	-0.235071	0.133991
		28	0.145145	0.204828
		29	0.342271	0.109897
		30	0.201029	0.0701432
		31	-0.0580236	0.609182
		32	0.0271994	0.816817
		33	0.0516794	0.634517
		34	0.181654	0.15084
		35	-0.46237	0.0959831
		36	0.261292	0.240166
		37	-0.0977376	0.709012
		38	-0.39076	0.12094
		39	-0.233613	0.366834
		40	0.289499	0.259715
		41	-0.070558	0.619152
		42	0.175699	0.232279
		43	0.179349	0.274623
		44	0.061211	0.689572
		45	0.131941	0.423322
		46	0.221554	0.118175
		47	-0.27027	0.148607
		48	-0.0568778	0.822626
		49	-0.0753213	0.697773
		50	-0.0191324	0.887665
		51	-0.106863	0.683113
		52	0.0181385	0.896422
		53	-0.433954	0.106062
		54	-0.165323	0.272208
		55	0.0976475	0.457942
		56	-0.126914	0.365156
		57	-0.363111	0.00508676
		58	0.0929261	0.589854
		59	0.202509	0.301381
		60	0.106358	0.590117
		61	0.115338	0.372031
		62	0.160077	0.230012
		63	-0.175807	0.380403
		64	0.340604	0.00774604
		65	0.0673972	0.605794
		66	0.15503	0.258404
		67	-0.254718	0.0605541
		68	-0.208834	0.173696
		69	0.026316	0.859079
		70	0.00866201	0.954439
		71	-0.123646	0.30427
		72	-0.311259	0.0448068
		73	-0.07413	0.538958
		74	0.0889459	0.539047
		75	0.00882856	0.939256
		76	-0.13895	0.241038
		77	0.137881	0.244713
		78	-0.108542	0.421573
		79	0.0897065	0.470345
		80	-0.00667626	0.957906
		81	-0.181917	0.171716
		82	-0.065146	0.583978
		83	0.0354603	0.855098
		84	-0.030738	0.807954
		85	0.388855	0.000617257
		86	0.131109	0.290261
		87	-0.0967423	0.436099
		88	0.338378	0.00583356
		89	0.140696	0.219202
		90	0.0608211	0.601725
		91	0.00124142	0.991224
		92	0.469588	0.000759293
