# Supplementary material for: Acquisition of auditory discrimination mediated by different processes through two distinct circuits linked to the lateral striatum
Source: eLife. 2025 Jul 11;13:RP97326. doi: 10.7554/eLife.97326 (PMC12252547; doi:10.7554/eLife.97326)
Supplement: Figure 7—figure supplement 1—source data 1. [file elife-97326-fig7-figsupp1-data1.xlsx]

## Sheet: Figure 7–figure supplement 1A
Figure 7–figure supplement 1A	Data	Mean firing rate and auROC values of CO-HR neurons at the early, middle, and late stages.
	Softwear	matlab ver 2019
	Group	Number of RS-HR neurons in the aDLS; 14, 29, and 43 neurons for early, middle, and late stages, respectively.
	Stats
	Firing rate at early stage
				Time bin
				1	2	3	4	5	6	7	8	9	10	11	12	13	14	15	16	17	18	19	20	21	22	23	24	25	26	27	28
	Trial type	Mean	HR	1.99633	2.01415	2.55937	2.32609	2.2391	2.24978	2.58507	2.54437	2.49075	2.45638	3.49779	4.05975	4.13069	4.33541	4.49744	5.3273	4.14341	4.5373	4.38261	4.78756	4.37038	4.58596	4.67261	4.54139	4.01916	2.95215	3.86817	3.74549
			LR	2.64453	2.85805	2.39814	2.71766	2.69725	2.90875	2.46904	2.44191	2.79032	1.90041	2.1486	2.6685	2.53957	3.06809	2.95912	3.23305	2.95955	2.70835	2.07826	2.48605	2.64499	2.87907	3.12398	3.00291	2.75557	2.68237	3.24606	2.55598
			HL	2.20348	2.38188	2.35356	2.45992	2.27868	2.75307	2.68316	3.64164	2.33871	2.55845	3.18882	3.53061	3.24374	3.32168	3.91478	3.41094	3.24217	3.09901	3.22499	3.35452	3.06993	3.64457	4.12272	3.42681	3.39651	3.44922	3.39868	3.82718
			LL	2.42794	2.86764	3.79846	2.31735	2.39521	2.34625	2.13793	2.10728	2.10723	2.48834	2.45339	2.36917	1.91555	2.76736	2.8232	3.37796	3.63299	2.53645	3.51215	3.56246	3.54702	3.4084	2.40316	2.6768	3.04704	2.96875	3.16144	2.5478
		s.e.m.	HR	0.483374	0.505277	0.660557	0.722323	0.560217	0.625847	0.781095	0.599782	0.54971	0.55766	0.916925	0.81573	0.815711	0.802201	1.00045	0.970392	0.749414	0.891683	0.721272	0.837495	0.75953	1.0842	0.862011	1.03141	0.699591	0.51015	0.787949	0.699694
			LR	0.541181	0.706377	0.763506	0.816028	0.708115	0.901455	0.747212	0.639253	0.620612	0.437271	0.549347	0.644413	0.531162	0.708132	0.503633	0.584048	0.586983	0.661855	0.552505	0.616954	0.634889	0.667838	0.501147	0.75406	0.666626	0.64159	0.715159	0.699371
			HL	0.589232	0.59529	0.830515	0.931947	0.871431	1.00615	0.807416	1.37098	0.806928	0.593742	0.904402	0.750654	0.908834	0.747596	0.821999	0.808528	0.599491	0.697897	0.709647	0.603533	0.538668	0.692855	0.92328	0.612871	0.749992	0.745012	0.664592	0.910266
			LL	0.449935	0.721145	0.818106	0.53026	0.664685	0.478966	0.51863	0.56488	0.554519	0.578107	0.511302	0.628219	0.369367	0.56796	0.57504	0.771113	0.919819	0.590624	0.838455	1.01063	1.00737	0.721893	0.688486	0.86132	0.740485	0.893573	0.899275	0.634569
		p value (vs. HR)	HR vs. LR	0.0803223	0.0681152	0.878662	0.3396	0.325806	0.760864	0.735352	0.635498	0.375732	0.167725	0.0806885	0.0494385	0.0651855	0.057373	0.0784912	0.00305176	0.00671387	0.00671387	0.00463867	0.00244141	0.00524902	0.0266113	0.0352783	0.010498	0.0418701	0.635498	0.153076	0.0202637
			HR vs. HL	0.6698	0.3396	0.839355	0.714844	0.614258	0.807739	0.909668	0.903198	0.587891	1	0.541626	0.714844	0.104004	0.0494385	0.325806	0.0397949	0.190918	0.118896	0.0784912	0.00170898	0.0478516	0.390991	0.414307	0.0784912	0.172607	0.635498	0.583008	0.6698
			HR vs. LL	0.135254	0.0784912	0.267578	0.454834	0.807739	0.892578	0.855225	0.295776	0.243896	0.807739	0.501587	0.0579834	0.00231934	0.00524902	0.0107422	0.0166016	0.42627	0.00610352	0.273438	0.067627	0.153076	0.203613	0.000854492	0.000610352	0.135254	0.735352	0.295776	0.0202637
	Firing rate at middle stage
				Time bin
				1	2	3	4	5	6	7	8	9	10	11	12	13	14	15	16	17	18	19	20	21	22	23	24	25	26	27	28
	Trial type	Mean	HR	1.85084	1.83015	1.75194	1.62272	1.69718	1.73913	1.69233	1.77419	1.90792	1.77167	3.12478	5.10784	4.16011	4.25897	3.8098	4.25597	3.74563	3.87183	3.40835	3.4623	3.16513	2.80658	2.73039	3.04637	2.77842	2.84897	2.74082	2.6714
			LR	2.32314	2.13162	1.5178	1.54574	2.33135	2.0234	1.97959	2.0043	2.05826	2.09873	2.57615	3.26387	3.30696	2.41738	2.50926	2.43874	2.0672	2.51686	2.70352	2.33555	2.60122	2.32297	2.53608	2.71042	2.32049	2.10995	2.12954	2.14718
			HL	1.68355	2.13532	1.50353	2.0939	1.61955	1.68614	2.01118	1.85162	1.98137	1.38819	2.06347	3.66747	3.3994	3.94814	2.97881	3.12426	2.92073	2.99489	1.98067	2.27362	2.08075	2.31459	2.02891	2.61737	2.86064	2.21195	2.35468	2.28287
			LL	1.76127	1.67247	1.95193	1.6095	1.68294	1.6717	1.66076	1.53761	1.82305	1.74181	1.48481	2.624	2.42695	2.43594	2.21703	2.28857	2.30084	2.27526	2.31775	1.89016	1.8507	1.91866	1.91186	2.17768	2.01751	2.11076	2.27719	2.25927
		s.e.m.	HR	0.354865	0.285299	0.278569	0.302515	0.271139	0.269024	0.308974	0.307652	0.313207	0.297999	0.736928	1.41213	0.938733	0.77704	0.68491	0.668218	0.556958	0.566831	0.499475	0.40888	0.487494	0.394894	0.392526	0.422014	0.367355	0.315689	0.423063	0.375677
			LR	0.522689	0.433427	0.315798	0.449523	0.566513	0.415611	0.545317	0.418755	0.386042	0.556618	0.526837	0.952118	0.770139	0.628796	0.429288	0.573472	0.474133	0.417478	0.506559	0.483966	0.587495	0.503974	0.488484	0.478523	0.383097	0.41206	0.493463	0.36981
			HL	0.333184	0.379552	0.314563	0.389185	0.296785	0.243475	0.336452	0.336187	0.382973	0.279157	0.482118	1.26601	0.938152	0.876816	0.627052	0.592512	0.494266	0.574494	0.393295	0.398728	0.356039	0.416841	0.458345	0.49314	0.539123	0.435078	0.465021	0.420369
			LL	0.291802	0.34145	0.459008	0.33242	0.466512	0.398182	0.380133	0.331892	0.344462	0.442115	0.315056	0.752402	0.686716	0.531614	0.397709	0.434328	0.444517	0.429641	0.503868	0.335637	0.353905	0.330278	0.309875	0.38578	0.346181	0.373019	0.368163	0.457145
		p value (vs. HR)	HR vs. LR	0.749855	0.848923	0.446041	0.191838	0.548061	0.400401	0.888897	0.770219	0.705121	0.361252	0.523707	0.0241683	0.163107	0.000519248	0.0148252	3.08404e-05	0.00014284	0.00284424	0.116955	0.0149875	0.248811	0.19821	0.533744	0.315755	0.399469	0.081724	0.206253	0.116118
			HR vs. HL	0.386789	0.348754	0.0973247	0.137305	0.600457	0.891317	0.178496	0.96961	0.61388	0.0555837	0.0263945	0.00191557	0.0693087	0.15045	0.0744292	0.00616545	0.0678653	0.0780115	0.000478971	0.00382834	0.0227733	0.250131	0.1011	0.290466	0.991374	0.0475785	0.294876	0.248811
			HR vs. LL	0.732665	0.258388	0.517179	0.885382	0.151388	0.413997	0.736607	0.30364	0.600446	0.279624	0.000750621	8.687e-05	8.687e-05	0.000191478	0.00153598	2.52321e-05	0.000537661	0.000714042	0.00446162	0.000609666	0.00105285	0.00264774	0.101089	0.0215324	0.0200954	0.0614273	0.939673	0.221803
	Firing rate at late stage
				Time bin
				1	2	3	4	5	6	7	8	9	10	11	12	13	14	15	16	17	18	19	20	21	22	23	24	25	26	27	28
	Trial type	Mean	HR	1.51993	1.54544	1.6107	1.48784	1.53392	1.44788	1.53979	1.63729	1.65264	1.79935	1.69928	2.67184	2.88317	2.55463	3.07467	2.95138	3.07874	3.40769	3.63087	3.58089	3.9515	4.0347	4.2442	4.41814	4.48802	4.71089	4.41157	4.50947
			LR	1.37416	1.41146	1.90585	1.59731	1.57205	1.45978	1.53533	1.80114	1.50813	1.34791	1.48426	1.4829	1.98209	1.32479	2.01301	1.63958	2.26867	1.54525	2.11562	2.23173	2.40328	2.02434	2.20995	1.7497	2.00095	2.16654	2.37475	2.60315
			HL	2.0665	2.26676	1.62335	1.95262	1.53992	1.41128	1.57167	1.98658	1.71785	1.40186	1.20401	1.10212	1.88452	1.68389	1.58053	1.45262	1.94542	1.67669	1.84446	1.82232	1.48418	1.38175	1.46314	1.74037	1.76048	1.63221	2.1479	1.7579
			LL	1.40699	1.46748	1.44342	1.5457	1.53186	1.4901	1.44688	1.42526	1.64426	1.45936	1.53454	1.72226	1.7146	1.57834	1.69168	1.61104	1.69736	1.92002	1.77804	1.84969	1.98138	1.94251	1.87705	2.11287	2.18796	2.27119	2.40164	2.14353
		s.e.m.	HR	0.183048	0.225282	0.236577	0.218966	0.226752	0.180713	0.250495	0.221142	0.235483	0.210254	0.22947	0.452174	0.416261	0.322896	0.349904	0.298409	0.29383	0.337942	0.36189	0.347937	0.420393	0.439934	0.479301	0.517023	0.491703	0.510672	0.512754	0.550056
			LR	0.358378	0.285065	0.357374	0.330018	0.36118	0.338648	0.335095	0.432893	0.318219	0.310035	0.359392	0.37597	0.48368	0.3205	0.374053	0.337569	0.407087	0.330198	0.622935	0.538515	0.480872	0.46497	0.462751	0.429727	0.415962	0.462256	0.381301	0.394441
			HL	0.404541	0.567671	0.460166	0.520213	0.407697	0.284043	0.344107	0.442493	0.449134	0.288137	0.274423	0.264031	0.407531	0.399326	0.391539	0.26717	0.344906	0.286596	0.336641	0.299881	0.361291	0.284154	0.324888	0.349625	0.366794	0.422244	0.405394	0.309971
			LL	0.193694	0.184841	0.175637	0.194544	0.183977	0.189829	0.190097	0.210404	0.210469	0.241478	0.207537	0.265473	0.277471	0.254904	0.260905	0.241447	0.244203	0.254867	0.242331	0.273142	0.279605	0.251433	0.238098	0.273305	0.269838	0.299172	0.277396	0.245948
		p value (vs. HR)	HR vs. LR	0.111639	0.262316	0.645139	0.94318	0.647786	0.683113	0.711522	0.427206	0.321522	0.0863992	0.146587	0.00637598	0.0375364	0.00658987	0.00910162	0.00227384	0.015215	2.65323e-05	0.000129296	0.00612359	0.00489992	0.00113689	0.00225047	0.000117183	0.00020972	0.000195194	0.00104394	0.00437585
			HR vs. HL	0.326481	0.414267	0.213259	0.936424	0.394611	0.664189	0.925036	0.925283	0.81054	0.390747	0.0502496	0.000596913	0.0153796	0.0124331	0.000157104	5.0919e-05	0.0017613	0.000150453	0.00072226	0.000253388	1.1688e-05	4.72936e-06	2.34235e-06	0.0001231	9.86803e-06	1.04601e-05	0.000565946	2.13405e-05
			HR vs. LL	0.139079	0.887763	0.62524	0.41059	0.891769	0.83264	0.961476	0.0739198	0.856039	0.0237755	0.344159	0.000718365	0.000205165	2.00987e-05	2.86616e-07	1.3918e-05	1.95399e-05	3.84289e-06	3.26023e-07	2.08314e-06	3.05612e-06	4.5298e-07	1.31458e-07	1.26443e-06	1.23604e-05	1.04639e-05	4.96679e-05	5.22988e-05
	ROC value at early stage
				Time bin
				1	2	3	4	5	6	7	8	9	10	11	12	13	14
	Trial types compared Trials compared Trials compired	Mean	HR vs. HL	0.4798	0.49077	0.494299	0.492187	0.494933	0.500358	0.511633	0.522334	0.526258	0.514787	0.520434	0.513413	0.493638	0.507284
			HR vs. LR	0.478705	0.491582	0.486454	0.50188	0.503535	0.530255	0.543318	0.54529	0.53424	0.549329	0.540257	0.530897	0.520412	0.519312
			HR vs. LL	0.478846	0.479122	0.501265	0.505343	0.506615	0.529686	0.539178	0.544615	0.533362	0.534946	0.519309	0.540642	0.512923	0.524042
		s.e.m.	HR vs. HL	0.00815074	0.0140104	0.0170253	0.0128149	0.00752125	0.00983906	0.00904949	0.0127191	0.0134627	0.0105185	0.0125398	0.0109011	0.0143033	0.0140351
			HR vs. LR	0.00892353	0.00754715	0.0117085	0.007454	0.0061327	0.0119223	0.0147632	0.01178	0.00819293	0.00932013	0.00951721	0.00936448	0.00931037	0.00470845
			HR vs. LL	0.00630354	0.0123682	0.00923078	0.0116705	0.00673261	0.0137192	0.0134472	0.0112921	0.0135201	0.0128578	0.0122168	0.0104824	0.0115032	0.0107444
		p value	HR vs. HL	0.176877	1	0.507369	1	0.507369	0.176877	0.507369	0.507369	0.0415571	0.176809	0.0415571	0.176877	1	0.176877
			HR vs. LR	0.0415571	0.745511	0.176877	1	1	0.0415571	0.0415571	0.0415571	0.00642194	4.1242e-05	0.000642719	0.000642719	0.0415571	0.00180353
			HR vs. LL	0.000642719	0.176877	0.507369	1	1	0.0415571	0.00642194	0.000642719	0.0415571	0.0415571	0.00642194	0.00642194	0.507369	0.00642194
	ROC value at middle stage
				Time bin
				1	2	3	4	5	6	7	8	9	10	11	12	13	14
	Trial types compared Trials compared Trials compired	Mean	HR vs. HL	0.496253	0.493554	0.493479	0.49369	0.508871	0.528159	0.514704	0.524294	0.523954	0.538031	0.518244	0.516188	0.512424	0.505494
			HR vs. LR	0.497093	0.500735	0.495668	0.498835	0.502907	0.531781	0.541541	0.537008	0.534499	0.524131	0.520466	0.511631	0.514667	0.510102
			HR vs. LL	0.504277	0.493487	0.503091	0.505776	0.504531	0.551703	0.546218	0.542292	0.538787	0.535891	0.526499	0.521811	0.518114	0.513627
		s.e.m.	HR vs. HL	0.00610616	0.00532011	0.00631524	0.00788286	0.00595804	0.0083905	0.00822	0.00828402	0.00947757	0.00802262	0.00713619	0.0092903	0.00844412	0.00742436
			HR vs. LR	0.0054049	0.00699169	0.0100656	0.00726732	0.00650601	0.0128717	0.0108777	0.00681768	0.00849179	0.0119897	0.00873035	0.00828068	0.0078798	0.00948004
			HR vs. LL	0.00570612	0.00501595	0.00773063	0.00467464	0.00485579	0.0114014	0.00783318	0.0081737	0.00913043	0.00766566	0.00558162	0.00781507	0.00646139	0.00813915
		p value	HR vs. HL	0.815967	0.0879658	0.0931363	0.633043	0.147311	0.000309126	0.231335	0.00177619	0.00177619	4.84029e-06	0.0530002	0.335403	0.0154888	0.0306863
			HR vs. LR	1	0.223846	0.335403	0.335403	0.815967	0.0306834	4.32307e-05	1.23547e-06	4.33357e-07	0.00821235	0.0154888	0.140318	0.0530002	0.00177619
			HR vs. LL	0.0530002	0.813039	0.147311	0.633043	0.147311	3.09839e-08	1.76717e-09	4.84029e-06	4.33357e-07	4.33357e-07	4.84029e-06	0.00365419	0.00821123	0.474713
	ROC value at late stage
				Time bin
				1	2	3	4	5	6	7	8	9	10	11	12	13	14
	Trial types compared Trials compared Trials compired	Mean	HR vs. HL	0.501149	0.513041	0.511091	0.504016	0.510829	0.535826	0.515627	0.532712	0.532041	0.527308	0.55918	0.553559	0.563642	0.549903
			HR vs. LR	0.503525	0.485522	0.504397	0.500866	0.494115	0.515144	0.517611	0.518662	0.53112	0.530194	0.531131	0.533432	0.545109	0.52912
			HR vs. LL	0.504526	0.501076	0.502173	0.501377	0.503936	0.51453	0.524216	0.528777	0.532203	0.538608	0.543539	0.544876	0.545669	0.546942
		s.e.m.	HR vs. HL	0.00777742	0.00858021	0.0102935	0.00976995	0.00907763	0.00707485	0.0114078	0.00830937	0.00909032	0.0139418	0.0117814	0.0120465	0.0123449	0.0115747
			HR vs. LR	0.00720651	0.006778	0.00776982	0.00710841	0.00787848	0.00890085	0.0104393	0.00857846	0.00811157	0.00964029	0.0101562	0.0107553	0.0118507	0.0110577
			HR vs. LL	0.00266291	0.0025824	0.00348816	0.00444805	0.0039761	0.00454699	0.00461764	0.00462954	0.0053329	0.0053865	0.00648937	0.00647149	0.0069289	0.0070474
		p value	HR vs. HL	0.107048	0.00231686	0.000198554	0.107053	0.107048	6.84627e-08	0.00598271	4.5262e-07	3.68039e-05	0.000245066	2.45978e-09	3.68039e-05	3.69941e-08	0.0013366
			HR vs. LR	0.111473	0.427488	0.0717209	0.0465147	0.846259	0.00265942	0.00999393	0.000165121	5.0872e-06	7.11555e-07	3.12566e-05	0.000751444	7.11653e-07	0.000751444
			HR vs. LL	0.00529046	0.166065	0.166065	0.166065	0.233047	0.00143323	7.11653e-07	8.80895e-09	8.54722e-08	7.7864e-10	3.83138e-12	2.13136e-13	7.7864e-10	8.80895e-09

## Sheet: Figure 7–figure supplement 1B
Figure 7–figure supplement 1B	Data	Mean firing rate and auROC values of CR-HR neurons at the early, middle, and late stages.
	Softwear	matlab ver 2019
	Group	Number of CR-HR neurons in the aDLS; 52, 73, and 75 neurons for early, middle, and late stages, respectively.
	Stats
	Firing rate at early stage
				Time bin
				1	2	3	4	5	6	7	8	9	10	11	12	13	14	15	16	17	18	19	20	21	22	23	24	25	26	27	28	29	30	31	32	33	34	35	36	37	38	39	40
	Trial type	Mean	HR	3.46809	4.29324	4.39228	4.0505	4.40148	4.09607	4.16013	4.57806	4.44857	4.77219	5.2043	5.32591	5.37704	5.4262	5.9563	6.11189	5.8302	5.96781	6.26051	6.59043	6.82319	6.66538	6.62666	6.18962	6.49856	5.96119	5.49886	5.2811	5.78053	5.92352	5.50319	5.24284	4.52664	4.1864	4.16382	3.61589	3.04908	3.04788	2.92205	2.21533
			LR	3.15048	3.64996	3.73801	3.90995	4.14857	4.02323	4.05463	3.91982	4.50125	4.08423	4.23997	4.54595	4.78677	4.45638	4.81335	4.79449	5.08026	5.29948	5.8305	6.16377	6.52345	6.22544	6.93186	6.89303	6.76043	6.36215	5.09849	4.91969	4.59785	4.56946	4.26695	3.93356	3.48472	2.85319	2.37304	2.15162	2.17261	1.72183	1.89342	1.69827
			HL	2.198	2.34596	2.1723	2.12436	2.4334	2.4696	2.33389	2.18692	2.50075	2.31933	2.21461	2.56081	2.64342	2.65907	2.51867	2.58106	2.86944	2.68666	3.41674	3.73125	3.98938	4.3206	4.52666	5.83163	5.41555	4.13936	3.19411	2.41213	2.37855	1.80647	1.59441	1.51816	1.53771	1.44679	1.42227	1.37241	1.42452	1.38916	1.19792	1.44365
			LL	2.45082	2.55255	2.52869	2.43915	2.43094	2.55077	2.80648	2.77289	2.6724	2.71817	2.6594	2.46692	2.68407	3.0641	3.16424	3.1139	3.40682	3.2632	3.99822	3.97936	4.55697	4.80598	5.0042	5.71912	5.66585	4.99859	3.77545	2.8408	2.15507	2.2606	2.10512	2.07111	2.27352	2.33223	2.71889	2.84513	2.76571	3.22086	3.62459	3.71128
		s.e.m.	HR	0.492398	0.59658	0.550626	0.586374	0.637542	0.58414	0.564729	0.567019	0.535941	0.615949	0.670526	0.712191	0.699085	0.797659	0.939637	0.972635	1.01053	1.01171	1.09838	1.29677	1.54582	1.36679	1.27162	1.16002	1.35275	1.43705	1.26396	1.3052	1.42638	1.4633	1.33792	1.3032	1.12947	0.955735	0.934529	0.794357	0.703048	0.772349	0.763921	0.596502
			LR	0.418176	0.516129	0.558791	0.570488	0.541296	0.512581	0.544939	0.501763	0.538302	0.468327	0.465934	0.513389	0.518548	0.5431	0.681299	0.609727	0.743569	0.895267	1.14495	1.31694	1.48993	1.32179	1.3663	1.28504	1.39944	1.47636	1.28182	1.16466	1.13574	1.17307	1.11704	1.06751	0.815247	0.628923	0.572081	0.456836	0.485085	0.360175	0.37186	0.312769
			HL	0.257938	0.301828	0.291457	0.259479	0.354078	0.304689	0.304931	0.312379	0.357916	0.356376	0.337014	0.379452	0.412945	0.446185	0.482813	0.49596	0.573805	0.579399	0.708864	0.841941	0.903715	1.02399	1.1458	1.68884	1.59753	1.21613	0.877359	0.649774	0.816958	0.711671	0.602472	0.57998	0.618537	0.522964	0.374302	0.360031	0.318991	0.405594	0.31112	0.445835
			LL	0.415486	0.364306	0.365901	0.386463	0.371034	0.393009	0.459548	0.506203	0.443543	0.507976	0.543749	0.555454	0.634807	0.732565	0.761956	0.845294	0.893909	0.891896	1.02364	1.02479	1.17375	1.30806	1.52176	1.89814	1.891	1.62729	1.03349	0.817995	0.630497	0.636799	0.58904	0.625882	0.628513	0.617365	0.666106	0.695957	0.736296	1.0121	1.09265	1.15355
		p value (vs. HR)	HR vs. LR	0.343565	0.0409018	0.0471068	0.448581	0.401509	0.676589	0.464699	0.0506565	0.67859	0.0997876	0.0188366	0.0866267	0.303909	0.0296568	0.0535219	0.00802648	0.243732	0.154216	0.180106	0.308472	0.338953	0.314816	0.746472	0.192526	0.67247	0.495195	0.309951	0.583343	0.168483	0.00930101	0.0106531	0.028843	0.131775	0.155839	0.0895836	0.0459753	0.48748	0.591026	0.640629	0.980732
			HR vs. HL	0.0144261	0.0017315	3.15575e-05	0.000804199	0.00489348	0.0192585	0.00130554	0.0003552	0.000439307	0.00018185	2.48097e-05	0.000117049	0.000382755	0.000410121	1.86683e-05	2.38272e-05	0.000486708	6.38859e-05	0.00156986	0.00120078	0.0135875	0.0158551	0.0136474	0.126781	0.0355003	0.165667	0.0682528	0.20056	0.0687332	0.00815518	0.00580248	0.000351276	0.00111741	0.00375501	0.00321557	0.0262575	0.207924	0.195419	0.148686	0.612574
			HR vs. LL	0.0641307	0.011059	0.0014354	0.013588	0.00551451	0.0154161	0.00804649	0.0032475	0.00187049	0.0001601	0.000130823	2.97276e-05	0.000225756	0.000279409	8.03697e-05	4.5942e-05	0.000831005	0.000470391	0.000668957	0.00132528	0.0302	0.00902259	0.00928935	0.0518116	0.0631311	0.357234	0.187115	0.144627	0.0758319	0.0782577	0.0167113	0.0162983	0.0705791	0.0515169	0.209636	0.64241	0.522732	0.797375	0.773661	0.365136
	Firing rate at middle stage
				Time bin
				1	2	3	4	5	6	7	8	9	10	11	12	13	14	15	16	17	18	19	20	21	22	23	24	25	26	27	28	29	30	31	32	33	34	35	36	37	38	39	40
	Trial type	Mean	HR	3.44355	3.6173	3.9338	4.11587	4.04197	4.17209	4.41367	4.3609	4.91957	5.35486	4.99789	5.31957	5.30449	5.21273	5.33471	5.27469	5.54552	5.54792	5.63566	5.88161	5.51505	5.72622	5.37405	5.37795	5.09474	4.69404	5.07853	5.27031	5.33118	5.44696	4.96631	4.95775	4.70209	4.66931	4.25504	3.89245	3.07912	2.50658	2.46255	2.09428
			LR	3.54512	3.56736	3.84455	4.11465	3.71875	4.17864	3.93196	4.01165	4.41891	4.66854	4.97299	4.96441	4.65918	4.95171	4.63724	5.02245	5.40931	5.51786	5.59552	5.42728	5.37101	5.4371	4.95357	5.29656	5.00088	4.45415	3.73832	3.52349	3.85857	3.47875	3.48423	3.33924	3.24993	3.21402	3.12215	3.02213	2.84117	2.84612	2.85552	2.4861
			HL	2.19272	2.51448	2.71097	2.71409	2.79539	2.86885	2.84006	3.29531	3.1029	3.07447	3.13331	3.6615	3.1942	3.56848	3.12862	3.14755	3.2946	3.80883	3.72754	4.06823	3.68745	3.9216	4.30621	4.44027	4.62469	4.27823	3.1496	2.57779	2.51479	2.12577	2.33755	2.30978	2.14064	2.10076	2.0031	1.76692	1.68882	1.62144	1.45066	1.65247
			LL	2.55334	2.7884	2.80321	3.01857	2.95706	3.09465	3.28874	3.03696	3.22363	3.28043	3.39366	3.5967	3.67341	3.35099	3.28115	3.38209	3.61165	3.51411	3.79511	3.66961	3.82213	4.24014	4.45993	4.64805	4.84668	3.90948	3.37336	2.8401	2.99581	2.78738	3.36456	3.3993	4.02202	3.5084	3.45178	3.31029	3.369	3.03312	2.80021	2.82465
		s.e.m.	HR	0.345173	0.356215	0.385725	0.386865	0.37524	0.394854	0.468201	0.414437	0.507924	0.528578	0.498812	0.590211	0.622343	0.561657	0.58142	0.551966	0.548913	0.600259	0.602957	0.650732	0.652699	0.767661	0.729352	0.704231	0.638126	0.61368	0.735487	0.947969	1.10115	1.18285	1.1319	1.12765	1.08821	1.03271	0.909879	0.771966	0.633833	0.553998	0.519802	0.477011
			LR	0.41431	0.380145	0.372069	0.389276	0.394656	0.402071	0.454606	0.418961	0.46213	0.536644	0.532867	0.54918	0.498455	0.550821	0.51316	0.563378	0.567355	0.515376	0.5324	0.60631	0.621435	0.743793	0.685512	0.652075	0.679841	0.608815	0.498059	0.465535	0.625703	0.601816	0.617758	0.670276	0.619521	0.668792	0.714952	0.725372	0.691561	0.661297	0.678592	0.56486
			HL	0.305496	0.371365	0.40604	0.380544	0.384779	0.402775	0.423734	0.525413	0.503901	0.525078	0.524143	0.666378	0.635638	0.643243	0.654575	0.623065	0.624958	0.788179	0.729258	0.756833	0.737665	0.769366	0.86228	0.957521	1.14872	1.06467	0.891	0.831701	0.767628	0.783299	0.758032	0.743414	0.691827	0.609797	0.488593	0.441941	0.312543	0.310272	0.250338	0.29418
			LL	0.349352	0.409543	0.403683	0.410241	0.425115	0.435893	0.480521	0.464446	0.492037	0.521835	0.535996	0.587589	0.61868	0.616368	0.673775	0.667377	0.688593	0.662852	0.730033	0.69228	0.732126	0.822175	0.915977	1.06878	1.23899	1.0008	0.816328	0.749901	0.796491	0.631018	0.696108	0.742092	0.911446	0.800932	0.75058	0.738111	0.71616	0.674745	0.67018	0.654028
		p value (vs. HR)	HR vs. LR	0.840963	0.826762	0.949744	0.635364	0.13411	0.897205	0.142418	0.290812	0.177127	0.0261639	0.552686	0.180682	0.0624491	0.262069	0.0309511	0.462257	0.415818	0.654375	0.653476	0.13036	0.673378	0.285238	0.675562	0.669222	0.505048	0.227314	0.00715692	0.0849571	0.281668	0.0550207	0.369973	0.120343	0.317663	0.219758	0.0828503	0.0600787	0.481541	0.378986	0.118185	0.222615
			HR vs. HL	7.90328e-05	0.00451756	0.00388742	0.000554667	0.000665212	0.000426596	0.000501786	0.0012235	0.000271238	2.89625e-05	8.0004e-05	0.000686888	3.04717e-05	0.000124375	2.84325e-05	1.72797e-05	1.69459e-06	0.000128011	0.000149594	0.000101425	5.3686e-05	0.00019309	0.00470266	0.000526487	0.00740088	0.0636954	0.00617136	0.00317921	0.00866754	0.00225093	0.0174529	0.0129882	0.0471949	0.0150638	0.0461049	0.0136312	0.168312	0.324515	0.211587	0.756583
			HR vs. LL	0.00877569	0.0138648	0.00596434	0.00488865	0.00394909	0.00488865	0.00353054	0.000889468	0.000645063	0.000170011	0.000245315	0.000313757	0.000237229	5.78361e-05	2.53741e-05	1.5991e-05	1.05688e-05	7.24096e-06	7.65085e-05	1.35446e-05	0.000124996	0.000320213	0.0021922	0.00346465	0.0141703	0.0268068	0.0154944	0.0200839	0.103359	0.0658688	0.28526	0.139935	0.412429	0.348571	0.602538	0.339892	0.958812	0.673056	0.595867	0.455144
	Firing rate at late stage
				Time bin
				1	2	3	4	5	6	7	8	9	10	11	12	13	14	15	16	17	18	19	20	21	22	23	24	25	26	27	28	29	30	31	32	33	34	35	36	37	38	39	40
	Trial type	Mean	HR	5.12771	5.10459	4.88793	4.98985	5.01706	5.15746	5.11361	5.43773	5.49695	5.49624	5.48763	5.65516	5.83547	6.41025	6.85375	8.16201	9.38043	10.4561	10.2926	10.6534	10.3444	9.15439	8.34538	7.34487	5.80405	5.36156	4.50979	4.22932	3.86138	3.34688	3.11965	2.73387	2.46681	2.04231	1.82445	1.47701	1.05207	1.05073	1.07249	1.01803
			LR	3.7965	4.42431	3.71922	4.28321	4.19704	4.42892	4.56932	4.41872	4.28236	4.58424	4.85157	4.25304	6.21897	6.5085	6.39425	7.28135	8.73489	9.48779	10.096	9.95037	9.52211	7.38097	7.63357	5.54091	4.30581	3.80952	3.84189	3.21256	2.68818	2.19108	1.57267	1.65284	1.41162	1.44833	1.13336	1.26278	1.11521	1.31262	1.08999	1.44701
			HL	2.33432	1.94148	2.50679	2.20683	2.1815	2.07829	1.94854	2.02953	2.14402	2.20595	2.64716	2.8854	3.24166	3.19917	3.36981	4.13219	3.97111	4.26182	5.04118	5.43	5.85822	5.3773	5.42515	4.99671	3.67669	2.52103	2.09787	2.06812	2.1639	1.72032	1.54722	1.77514	1.76939	1.53535	2.06099	1.94843	2.14277	2.06476	1.56836	1.557
			LL	2.56146	2.38944	2.44294	2.45996	2.6035	2.65709	2.93456	3.08313	3.25842	3.60176	3.68062	3.87624	4.07098	4.2891	4.35667	4.24	4.3204	4.55219	4.74105	4.71041	4.76747	5.08582	5.34157	4.77146	3.73262	3.26799	2.69444	2.68942	3.18233	3.44166	3.6748	3.51986	3.42161	3.27091	2.92244	2.57755	2.25953	2.07067	1.96385	1.51732
		s.e.m.	HR	0.575642	0.592391	0.577567	0.609966	0.584733	0.579172	0.566791	0.648665	0.60416	0.589065	0.66633	0.634205	0.66987	0.725624	0.821255	1.0621	1.44589	1.62371	1.56058	1.59269	1.55654	1.30524	1.22569	1.12381	1.20619	1.46811	1.46128	1.45893	1.29353	1.13052	1.08442	0.815978	0.711722	0.554904	0.512816	0.407426	0.31079	0.297257	0.241786	0.222661
			LR	0.52971	0.723044	0.647782	0.557013	0.587173	0.7169	0.665685	0.654995	0.537912	0.668481	0.687488	0.492733	0.839269	0.802846	0.892514	1.14748	1.3662	1.39366	1.63959	1.74368	1.41163	1.15746	1.12242	0.86443	1.09075	1.06132	1.22337	1.17663	1.03929	0.987532	0.495209	0.585336	0.344402	0.350388	0.322866	0.349788	0.292659	0.32468	0.252438	0.298742
			HL	0.439602	0.409881	0.518011	0.430588	0.320648	0.336251	0.331722	0.376169	0.335136	0.349127	0.553269	0.536986	0.537648	0.56327	0.600033	0.726839	0.75196	0.883483	0.930965	0.941086	1.05853	1.01398	1.14085	1.10558	0.930196	0.911698	0.744711	0.532895	0.59801	0.447823	0.441821	0.407421	0.4989	0.342972	0.401304	0.533198	0.488695	0.570523	0.377259	0.38994
			LL	0.314105	0.296957	0.304486	0.30788	0.355466	0.339037	0.436103	0.468017	0.470468	0.581714	0.631281	0.65947	0.672668	0.748184	0.684033	0.690397	0.677634	0.759166	0.752288	0.823438	0.828175	0.898242	1.0719	1.07662	1.05706	1.03164	0.849331	0.842715	1.05766	1.27498	1.36884	1.27344	1.22996	1.14328	1.01742	0.809198	0.703165	0.614583	0.60179	0.448657
		p value (vs. HR)	HR vs. LR	0.00912941	0.0419881	0.018426	0.127612	0.0542492	0.0222025	0.160128	0.00596415	0.00254302	0.0201537	0.0303071	0.00338729	0.912061	0.797867	0.196809	0.0185664	0.151084	0.403072	0.537044	0.199247	0.267549	0.0038875	0.271255	0.000962117	7.22538e-05	0.00330654	0.1656	0.0302158	0.00204612	0.00974589	0.00308823	0.00346202	0.125962	0.439391	0.212286	0.254944	0.663846	0.87337	0.435923	0.104954
			HR vs. HL	4.73109e-06	4.16111e-08	4.97588e-05	1.81965e-05	5.64761e-07	3.04062e-06	6.51946e-07	1.03645e-06	3.61306e-07	1.44492e-07	1.38747e-05	1.44616e-05	0.000197756	5.05916e-05	9.61392e-05	4.9306e-07	0.000242545	1.95373e-06	0.000977643	0.00115781	0.00189904	0.000636212	0.00554991	0.012557	0.0136684	0.00208493	0.0283112	0.236436	0.347924	0.73931	0.0911439	0.642498	0.22635	0.541679	0.328438	0.734103	0.0218959	0.0456586	0.496926	0.294948
			HR vs. LL	4.69146e-07	1.36806e-06	8.88277e-05	5.20538e-05	1.86753e-05	3.69849e-06	4.18525e-05	0.000149305	0.000929915	0.00659053	0.0222022	0.0183847	0.02502	0.00326842	0.00239468	0.00013753	0.000159624	3.12174e-05	0.00012864	2.10694e-05	1.24977e-05	0.000672153	0.0129822	0.0102478	0.00716435	0.0249929	0.0222734	0.117084	0.342106	0.680382	0.602773	0.517091	0.862943	0.471181	0.439123	0.192567	0.047438	0.0723016	0.250246	0.207462
	ROC value at early stage
				Time bin
				1	2	3	4	5	6	7	8	9	10	11	12	13	14	15	16	17	18	19	20
	Trial types compared Trials compared Trials compired	Mean	HR vs. HL	0.530702	0.539893	0.538724	0.552354	0.551655	0.557337	0.555339	0.566756	0.560724	0.555466	0.552107	0.538858	0.53549	0.540644	0.559744	0.569415	0.560784	0.549199	0.536724	0.527949
			HR vs. LR	0.503002	0.511092	0.504259	0.507474	0.505039	0.516007	0.512403	0.517501	0.51113	0.506983	0.504608	0.494959	0.4983	0.506368	0.526085	0.523315	0.519541	0.528842	0.522064	0.514053
			HR vs. LL	0.532641	0.53864	0.540862	0.537526	0.546658	0.558695	0.558591	0.559801	0.557651	0.555737	0.544055	0.539796	0.535201	0.532724	0.555086	0.555616	0.540803	0.520607	0.507655	0.48693
		s.e.m.	HR vs. HL	0.00929573	0.009214	0.0111545	0.0108751	0.0113293	0.0117715	0.0136438	0.0131521	0.0156617	0.018161	0.0215627	0.0221952	0.0240331	0.0256707	0.0261782	0.0241447	0.0214022	0.0170511	0.0169715	0.0159449
			HR vs. LR	0.00450375	0.00733086	0.00730381	0.00730779	0.00696037	0.00636097	0.00634288	0.00626885	0.00658098	0.00686172	0.00590346	0.00681904	0.00839295	0.00737353	0.0106614	0.0113678	0.0121097	0.0124189	0.0123744	0.0135849
			HR vs. LL	0.011113	0.0108586	0.0117685	0.0127632	0.013254	0.0140551	0.0158179	0.0163382	0.0179421	0.0187047	0.0225778	0.0236015	0.0248524	0.0265293	0.0263279	0.0248408	0.021851	0.0203512	0.0215608	0.0213287
		p value	HR vs. HL	0.00388078	3.04423e-05	0.0303953	2.67033e-06	1.46906e-05	2.67033e-06	2.67033e-06	6.74061e-12	6.04444e-08	0.000140544	0.000305612	0.000270737	0.00187488	0.0259168	0.0443577	0.00327729	0.000721815	0.00296703	0.856071	0.266165
			HR vs. LR	0.720402	0.0115272	0.0713089	7.13073e-05	0.366091	7.13073e-05	7.13037e-05	0.00206057	0.0303953	0.0463063	0.720402	0.145775	0.468111	0.191865	0.000387393	0.0931532	1	0.0635089	1	0.857474
			HR vs. LL	0.14927	0.00115775	0.00115775	0.00388078	0.000305625	2.67033e-06	1.88949e-08	6.045e-08	1.46897e-05	1.46906e-05	0.00388068	1.23756e-05	0.046305	0.137869	0.0163683	0.00608536	0.196708	0.715514	0.715513	0.856071
	ROC value at middle stage
				Time bin
				1	2	3	4	5	6	7	8	9	10	11	12	13	14	15	16	17	18	19	20
	Trial types compared Trials compared Trials compired	Mean	HR vs. HL	0.526751	0.533385	0.533944	0.527995	0.54304	0.541666	0.545123	0.552559	0.55304	0.549035	0.549347	0.534444	0.534181	0.558536	0.556313	0.545856	0.546848	0.540828	0.523151	0.515528
			HR vs. LR	0.497589	0.5041	0.503411	0.504068	0.511245	0.506589	0.504591	0.508506	0.507405	0.507511	0.507674	0.506096	0.502782	0.526888	0.526194	0.525255	0.524431	0.523728	0.502019	0.493921
			HR vs. LL	0.525696	0.532471	0.5305	0.53066	0.543413	0.541598	0.542736	0.551826	0.552703	0.554234	0.546461	0.535674	0.537731	0.549721	0.540106	0.524119	0.517603	0.512274	0.490412	0.49208
		s.e.m.	HR vs. HL	0.008667	0.00913074	0.0101499	0.012097	0.0126963	0.0134632	0.0133667	0.0143557	0.0154887	0.0153357	0.0150792	0.0187438	0.0200149	0.0212224	0.0210069	0.0197094	0.019203	0.0177449	0.0127062	0.0122484
			HR vs. LR	0.00582874	0.00559973	0.00462229	0.00523206	0.00641025	0.00639462	0.004937	0.00570825	0.00745086	0.00606533	0.00643295	0.00695785	0.00782991	0.00931111	0.0119978	0.0108614	0.00976359	0.00894038	0.00896576	0.0102014
			HR vs. LL	0.00908922	0.00983129	0.0102268	0.0107353	0.0123927	0.0132152	0.0138489	0.0142239	0.0148553	0.0150462	0.0152757	0.0178014	0.0204989	0.0210705	0.0218609	0.0209355	0.0217576	0.0194802	0.0173585	0.0163919
		p value	HR vs. HL	2.22085e-06	3.79898e-06	1.92619e-06	1.61763e-07	1.3242e-08	3.86459e-10	9.13779e-08	1.3242e-08	1.26528e-10	3.75708e-09	2.32071e-10	8.20752e-07	0.00268155	3.80203e-06	0.0036444	0.0104578	0.00204237	0.0526803	0.341876	0.337688
			HR vs. LR	0.88027	0.359165	0.0933821	0.0460065	0.1261	0.0094828	0.88027	0.00948288	0.359166	0.221213	0.126101	0.221211	0.877933	0.265288	0.19672	0.633951	0.752481	0.523193	0.0263751	0.0823639
			HR vs. LL	0.000447338	6.87782e-05	0.00013569	6.18816e-05	9.13749e-08	1.61832e-08	1.61826e-08	4.77513e-12	9.07207e-10	2.09569e-09	1.3242e-08	1.81229e-05	0.00013989	0.00150728	0.0771353	0.155348	0.0570274	1	0.636793	0.265288
	ROC value at late stage
				Time bin
				1	2	3	4	5	6	7	8	9	10	11	12	13	14	15	16	17	18	19	20
	Trial types compared Trials compared Trials compired	Mean	HR vs. HL	0.562025	0.548774	0.553229	0.566055	0.564123	0.55345	0.553609	0.570616	0.58944	0.576581	0.570077	0.547135	0.530834	0.516621	0.515591	0.517892	0.515245	0.487985	0.480732	0.490178
			HR vs. LR	0.51644	0.511967	0.511927	0.517353	0.521598	0.510256	0.494339	0.514577	0.506429	0.514512	0.527844	0.526584	0.53795	0.511794	0.522293	0.526572	0.510863	0.506727	0.491673	0.492103
			HR vs. LL	0.554386	0.546843	0.550702	0.549688	0.547415	0.54324	0.541983	0.560902	0.583091	0.590596	0.588343	0.560405	0.54223	0.518965	0.50678	0.497906	0.488603	0.481951	0.477666	0.485583
		s.e.m.	HR vs. HL	0.0111066	0.0127844	0.011271	0.0109545	0.0125734	0.0139461	0.0131122	0.0151274	0.0195895	0.0210654	0.0197211	0.0189728	0.0155696	0.0154295	0.0146201	0.0163232	0.0133874	0.014245	0.0114008	0.0111646
			HR vs. LR	0.00866832	0.0092793	0.00905551	0.00907287	0.00854324	0.0107113	0.0109903	0.0101805	0.0120787	0.0118012	0.00961647	0.00882552	0.00825601	0.00893324	0.00917656	0.00880551	0.00874608	0.0090771	0.00954727	0.00809301
			HR vs. LL	0.00950535	0.00935601	0.00987027	0.010159	0.01153	0.0128527	0.0125509	0.013582	0.0177285	0.0190484	0.0181901	0.0184999	0.0171033	0.017068	0.0177084	0.0173338	0.0165133	0.0145653	0.0120436	0.00976721
		p value	HR vs. HL	4.05227e-11	1.20103e-05	1.06936e-09	1.57395e-11	7.57839e-09	7.01837e-06	3.01912e-05	1.38055e-05	7.01815e-06	0.000415881	0.000344252	0.000663802	0.000152397	0.00194974	0.000754187	0.0412038	0.0343272	0.505843	0.497283	0.236598
			HR vs. LR	0.00146741	0.0490157	0.010479	2.34341e-05	2.34341e-05	0.0978222	0.292446	0.289597	0.175692	0.0345424	0.0150698	0.000828857	4.07554e-07	0.0378029	3.52206e-05	2.0742e-07	0.13345	0.0759948	0.629548	0.635999
			HR vs. LL	1.51436e-09	1.33911e-06	4.23788e-09	2.50018e-08	1.25505e-05	0.000532805	0.00156511	4.77389e-05	6.67712e-07	3.02432e-06	1.33911e-06	0.00400328	0.000265261	0.0273297	0.0185458	0.0607263	0.146673	0.641613	0.753938	0.877796
