# Supplementary material for: Acquisition of auditory discrimination mediated by different processes through two distinct circuits linked to the lateral striatum
Source: eLife. 2025 Jul 11;13:RP97326. doi: 10.7554/eLife.97326 (PMC12252547; doi:10.7554/eLife.97326)
Supplement: Figure 7—figure supplement 2—source data 1. [file elife-97326-fig7-figsupp2-data1.xlsx]

## Sheet: Figure 7–figure supplement 2A
Figure 7–figure supplement 2A	Data	Mean firing rate and auROC values of CO-LL neurons at the early, middle, and late stages.
	Softwear	matlab ver 2019
	Group	Number of CO-LL neurons in the pVLS; 0, 10, and 16 neurons for early, middle, and late stages, respectively.
	Stats
	Firing rate at early stage			Not detected
	Firing rate at middle stage
				Time bin
				1	2	3	4	5	6	7	8	9	10	11	12	13	14	15	16	17	18	19	20	21	22	23	24	25	26	27	28
	Trial type	Mean	HR	3.38925	3.07271	3.76681	3.01514	3.46985	3.61111	3.57097	4.13634	2.95967	3.61602	36.466	28.1355	15.5373	12.0836	10.8252	11.016	10.043	9.80348	9.35749	9.48175	9.4731	8.80517	9.66141	8.17575	7.52685	6.76193	7.03901	7.49821
			LR	3.43444	2.31779	4.10992	3.56277	3.17403	3.8249	3.8738	3.64877	3.63278	3.46864	29.8411	30.8127	15.688	11.4722	10.1307	10.2771	9.05748	8.25137	8.7332	8.37828	9.24131	7.53439	7.11638	6.58036	5.88049	6.72677	8.53901	7.53335
			HL	2.33297	3.24396	3.68242	3.67143	5.84066	2.6022	2.77802	2.43956	2.7022	2.08242	33.2462	28.2165	16.0429	8.72088	8.66703	9.18462	8.94615	7.65824	10.2681	9.01209	7.93736	9.87253	8.90549	9.57692	9.25824	8.13736	6.92637	7.74945
			LL	3.93183	4.52924	3.58315	4.12894	3.30168	3.56882	2.65079	4.02802	2.90726	2.57169	26.2401	28.3098	13.4433	8.58962	10.0442	8.91006	8.87103	7.93754	6.52165	6.93877	7.06452	6.24077	6.25059	5.00794	6.05346	7.24459	6.67668	5.51371
		s.e.m.	HR	0.952606	1.06893	1.20694	0.736841	1.08253	0.834388	1.11845	1.1295	1.09682	1.12312	9.16539	7.73505	5.25175	4.11333	3.69939	3.63798	3.73932	3.31491	3.05122	2.82141	2.66115	2.89435	2.51814	2.48868	2.34752	2.05216	2.2248	2.48691
			LR	0.979535	0.841246	1.29923	1.05043	1.16306	1.38622	1.15428	1.14775	1.27577	1.00974	8.29923	8.88465	5.572	4.62708	3.78153	3.88168	3.36777	2.96004	2.99922	3.30299	2.77109	2.94392	2.73377	2.32561	2.04417	1.95389	2.30268	2.36197
			HL	0.666737	0.978622	1.10641	1.26224	1.53539	0.6149	1.07445	0.559869	0.574696	0.780487	8.25721	8.07966	5.34873	3.38631	3.0447	3.0427	2.76757	2.88893	3.16462	3.07024	2.34427	3.24406	3.01239	3.02929	2.31828	2.66334	2.39981	2.19462
			LL	0.92854	1.496	0.910224	1.07449	1.05388	1.36561	0.887728	1.02154	0.817045	0.726999	7.21849	7.62922	4.09971	2.9015	2.89041	3.15923	2.47845	2.51475	1.7627	2.24007	2.28742	1.80069	2.28353	1.39334	2.18006	2.26989	1.97299	1.78792
		p value (vs. HR)	LL vs. HR	0.695312	0.130859	0.845703	0.232422	0.695312	0.492188	0.0371094	0.769531	0.625	0.0644531	0.160156	0.492188	1	0.0644531	0.921875	0.0273438	1	0.232422	0.0644531	0.0488281	0.105469	0.0371094	0.00390625	0.0371094	0.160156	1	0.845703	0.232422
			LL vs. LR	0.492188	0.0273438	0.734375	0.625	1	1	0.0839844	0.769531	0.556641	0.193359	0.130859	0.232422	0.275391	0.232422	0.845703	0.193359	0.921875	1	0.492188	0.431641	0.0839844	1	0.492188	0.431641	0.695312	0.845703	0.193359	0.375
			LL vs. HL	0.0703125	0.431641	1	0.652344	0.0195312	0.845703	0.976562	0.0488281	0.712891	0.359375	0.232422	0.945312	0.845703	0.820312	0.625	0.476562	1	0.496094	0.0273438	0.25	0.769531	0.181641	0.164062	0.193359	0.0371094	0.921875	0.556641	0.130859
	Firing rate at late stage
				Time bin
				1	2	3	4	5	6	7	8	9	10	11	12	13	14	15	16	17	18	19	20	21	22	23	24	25	26	27	28
	Trial type	Mean	HR	4.68358	4.28702	4.12442	4.31299	3.5906	3.936	4.00564	4.21479	4.24443	4.3387	29.6557	22.685	13.4313	9.8682	8.43662	9.27786	8.9017	8.44901	8.80701	9.25243	8.69285	8.06979	8.90643	8.47466	8.41988	9.05809	8.19635	8.34396
			LR	3.58507	5.35149	4.58123	4.43832	4.85068	3.94832	3.69758	3.06477	2.80546	3.76775	37.8089	32.3241	13.4435	9.38067	10.6252	8.70493	7.80329	6.19905	7.66227	7.43392	7.44879	7.20858	8.63297	5.9345	5.50393	4.89903	4.17171	4.94586
			HL	4.81393	2.53827	2.63827	3.65009	3.2963	3.11358	1.58765	4.53086	2.75432	3.11887	27.5584	19.8201	12.8374	7.3321	9.34568	7.88836	7.06914	9.5284	6.72875	7.86543	8.53333	9.06455	7.00159	6.78519	7.68765	8.51728	7.54515	6.69788
			LL	4.39306	4.36186	3.82649	3.77589	3.78014	4.44427	4.03363	4.14935	4.52964	3.67244	29.7998	24.0696	13.4033	8.46473	8.0638	7.42062	7.41774	7.39983	6.74148	7.03242	6.83054	6.60861	6.61809	6.80122	6.46224	6.14827	6.21792	6.09553
		s.e.m.	HR	0.806076	0.762213	0.734124	0.700491	0.67056	0.682389	0.621442	0.816645	0.858202	0.770469	6.17401	6.34506	4.09461	3.06796	2.66251	2.95268	2.81319	2.68363	2.96995	3.0818	3.02457	2.80259	3.16066	3.01544	2.89084	3.14188	3.12131	2.71392
			LR	0.992982	1.07734	1.08357	0.875835	1.05396	1.21232	0.840744	0.742064	0.874373	1.02526	8.65413	5.93312	2.89612	2.04863	2.58836	1.65224	2.23001	1.86956	2.42119	1.8491	1.88392	2.19632	2.19995	2.29277	1.52774	1.90703	1.2688	1.5599
			HL	0.818016	0.615986	0.724114	0.883951	1.17287	1.04052	0.619441	1.31945	1.08229	0.686059	6.1259	6.04572	4.22788	2.62726	3.0365	2.11881	2.53918	3.16543	2.39334	3.06303	3.07534	3.18291	2.48733	2.51099	2.42494	2.62271	2.52781	2.58037
			LL	0.722446	0.740665	0.790984	0.785759	0.733044	0.73692	0.66119	0.879655	0.853042	0.712549	7.17353	4.22662	2.20176	1.53204	1.48064	1.50497	1.4492	1.26664	1.47778	1.58309	1.34561	1.31856	1.58789	1.33201	1.33991	1.22326	1.21575	1.20872
		p value (vs. HR)	LL vs. HR	0.638672	0.719727	0.638672	0.389404	0.561401	0.357544	0.934082	0.761536	0.561401	0.0946045	0.599487	1	0.678772	0.977966	0.421204	0.583008	0.855225	0.276855	0.561401	0.761536	0.934082	0.296082	0.761536	0.951538	0.750977	1	0.561401	0.96637
			LL vs. LR	0.421204	0.106995	0.977966	0.359131	0.421204	0.229309	0.638672	0.106995	0.0353394	0.951538	0.0124512	0.00671387	0.977966	0.638672	0.0905762	0.207764	0.890381	0.0553589	0.561401	0.803955	0.803955	0.719727	0.330261	0.207764	0.053833	0.135376	0.106995	0.117004
			LL vs. HL	0.923035	0.0255737	0.083252	0.977966	0.638672	0.072998	0.00170898	0.803955	0.083252	0.846924	0.846924	0.359131	0.454285	0.0180664	0.678772	0.977966	0.761536	0.678772	0.524475	0.761536	0.890381	0.678772	0.561401	0.719727	0.923035	0.389404	0.846924	0.551819
	ROC value at early stage			Not detected
	ROC value at middle stage
				Time bin
				1	2	3	4	5	6	7	8	9	10	11	12	13	14
	Trial types compared Trials compared Trials compired	Mean	LL vs. HR	0.512564	0.498194	0.494512	0.484637	0.498168	0.429914	0.460145	0.470917	0.479679	0.465494	0.454178	0.431779	0.484616	0.4792
			LL vs. LR	0.52199	0.487767	0.502636	0.488156	0.491501	0.467703	0.463204	0.500706	0.514067	0.471549	0.469183	0.467393	0.503996	0.47507
			LL vs. HL	0.512196	0.496608	0.494337	0.507376	0.513606	0.461956	0.469528	0.506683	0.507041	0.442947	0.469038	0.44852	0.454508	0.471628
		s.e.m.	LL vs. HR	0.0103996	0.0151083	0.00937455	0.0147152	0.0106525	0.0543816	0.0223446	0.0173143	0.0222143	0.0169765	0.0169089	0.0189914	0.0191054	0.0193345
			LL vs. LR	0.00892179	0.0230918	0.0109911	0.00840221	0.00913674	0.0226677	0.0200717	0.0188381	0.0232639	0.0302353	0.0231563	0.0211813	0.0161659	0.0278665
			LL vs. HL	0.0154783	0.0201234	0.0126921	0.0166082	0.0119451	0.0411854	0.0336529	0.0222732	0.0222553	0.0236077	0.026365	0.0281832	0.0270391	0.0210884
		p value	LL vs. HR	0.442901	0.442901	0.442901	1	0.442901	0.0171871	0.115258	0.442901	1	0.115258	0.0171871	0.00142091	0.115258	0.442901
			LL vs. LR	0.0171871	1	0.442901	0.442901	0.442901	0.0171871	0.115258	0.442901	0.442901	1	1	0.442901	0.442901	0.442901
			LL vs. HL	1	0.442901	1	0.115258	0.442901	0.115258	1	1	1	0.0426349	0.230212	0.115258	0.0171871	0.442901
	ROC value at late stage
				Time bin
				1	2	3	4	5	6	7	8	9	10	11	12	13	14
	Trial types compared Trials compared Trials compired	Mean	LL vs. HR	0.502256	0.48545	0.501817	0.485325	0.501662	0.503023	0.513937	0.493022	0.491871	0.483946	0.488637	0.4768	0.475736	0.482175
			LL vs. LR	0.50224	0.491272	0.488001	0.520167	0.516824	0.420528	0.518606	0.464662	0.524727	0.491697	0.513739	0.498786	0.527654	0.530571
			LL vs. HL	0.524267	0.514451	0.540713	0.526723	0.519666	0.535991	0.54589	0.502311	0.501147	0.516655	0.496236	0.50751	0.48001	0.491155
		s.e.m.	LL vs. HR	0.00749821	0.0116958	0.00754934	0.00730177	0.011847	0.05453	0.0347117	0.0242972	0.0248373	0.0210209	0.025962	0.0279492	0.0263479	0.0262301
			LL vs. LR	0.0178274	0.0136322	0.0204073	0.0161123	0.0199419	0.0225234	0.0235897	0.0158223	0.0233435	0.0248763	0.0254102	0.0169467	0.0117474	0.0212961
			LL vs. HL	0.0170274	0.01392	0.016481	0.0141653	0.0198692	0.0513734	0.0314352	0.0242244	0.0280192	0.0195056	0.0297657	0.0299759	0.0271166	0.0287549
		p value	LL vs. HR	0.756318	0.100951	0.329417	0.100951	0.329417	0.329417	0.329417	0.100951	0.756318	0.329417	0.100951	0.329417	0.329417	0.756318
			LL vs. LR	0.756318	0.756288	0.756318	0.100951	0.329417	0.00297605	0.756318	0.00297605	0.100951	0.100951	0.329417	0.756318	0.00297605	0.0451203
			LL vs. HL	0.756318	0.329355	0.0211537	0.000277796	0.756318	0.756318	0.100951	0.756318	0.756318	0.329417	0.756318	0.100951	0.329417	0.756318

## Sheet: Figure 7–figure supplement 2B
Figure 7–figure supplement 2B	Data	Mean firing rate and auROC values of CR-LL neurons at the early, middle, and late stages.
	Softwear	matlab ver 2019
	Group	Number of CR-LL neurons in the pVLS; 8, 17, and 36 neurons for early, middle, and late stages, respectively.
	Stats
	Firing rate at early stage
				Time bin
				1	2	3	4	5	6	7	8	9	10	11	12	13	14	15	16	17	18	19	20	21	22	23	24	25	26	27	28	29	30	31	32	33	34	35	36	37	38	39	40
	Trial type	Mean	HR	7.30398	7.85537	8.2656	9.00052	8.80456	9.93901	8.8842	7.01248	7.93004	9.0646	9.20482	9.24893	8.34055	8.75388	8.89052	10.3608	10.5445	9.06309	8.67409	6.83139	7.08979	6.58446	6.56273	8.97863	10.0108	8.05224	6.6666	5.39974	4.41094	3.20922	3.36971	3.19703	3.18546	2.27569	1.70059	1.89017	2.12015	3.21596	1.83402	1.83722
			LR	7.45267	7.81336	8.11856	8.10393	8.45305	7.37437	8.61884	8.48825	9.60542	9.53405	8.35036	9.06235	7.80197	6.12101	7.32533	6.8954	7.37343	8.63294	8.83028	8.15368	7.52778	5.83805	6.97554	9.80781	10.5372	9.3784	7.30157	5.67896	4.18145	3.62044	4.22383	2.86627	3.37089	2.24615	2.36154	1.78462	2.53263	1.86144	2.01538	2.44615
			HL	6.66579	7.81977	6.90835	6.80552	8.00462	7.54094	6.42476	8.49317	8.62765	8.60405	8.3173	7.30617	9.34151	9.09229	8.3612	9.52866	13.4767	15.5727	14.335	10.9715	10.1473	10.9149	8.82566	10.6695	10.9742	13.2562	11.0562	6.62107	3.71952	4.42957	4.54463	3.25342	3.49921	3.0713	3.16092	4.17769	2.84669	2.74503	2.87708	3.36216
			LL	8.20567	6.33727	7.04009	8.48293	7.84309	8.29475	7.27611	9.55674	8.71873	10.1726	8.88817	9.81897	10.7285	9.89538	8.14862	10.5282	10.7833	11.2035	10.7418	10.7798	10.0927	8.29126	9.42966	12.0649	10.8617	11.0976	8.06595	5.12882	4.00926	3.33343	4.17336	2.49982	2.48399	3.35852	3.05014	3.96363	3.21139	2.4435	3.10676	3.46575
		s.e.m.	HR	2.17966	1.81394	2.53854	2.89133	2.75414	3.443	2.46746	1.89415	2.27694	2.66383	2.46057	2.217	2.06653	2.01339	1.94453	3.04609	3.2929	2.03841	1.52862	1.56442	1.82313	1.71547	1.60855	3.78264	3.86729	3.36807	3.67546	2.99098	3.13298	2.3363	2.30532	1.9507	1.99135	1.54617	1.52968	1.27415	1.24509	1.94131	1.04999	0.969939
			LR	1.79019	1.85234	2.01349	2.04861	2.442	1.79132	2.03775	2.26739	3.76182	2.77317	2.14646	2.11379	1.50249	1.41569	1.21684	1.30915	1.38158	1.44609	1.86795	1.42652	1.809	1.17459	1.6236	3.82316	4.14384	3.09635	4.07351	3.55299	2.4661	2.39781	2.23699	1.94852	1.9062	1.7012	1.48837	1.16952	1.39055	0.961339	1.12704	1.31917
			HL	1.90156	1.55289	1.6487	1.18825	1.45606	2.34067	1.72388	1.69882	1.57908	1.42183	1.95701	1.45541	1.55194	1.33313	1.52506	2.17908	4.38998	4.60952	4.71241	1.97716	1.83629	1.82491	2.04805	3.75107	3.52951	4.4811	4.03468	3.13939	1.80465	2.62773	2.93539	1.77968	2.44345	1.72836	1.87031	2.65102	1.5923	1.59706	1.72252	2.20908
			LL	2.35626	1.5051	1.33774	0.995219	1.37636	1.1783	1.2915	1.13037	1.3817	1.78389	1.45148	1.213	1.28945	1.17228	0.97271	1.27016	1.49687	1.88946	1.95964	1.82864	2.31784	1.58696	1.65356	4.46023	4.0201	2.94826	3.64729	3.27117	2.46231	2.08154	2.46595	1.50642	1.61857	1.89138	1.8342	2.36371	1.86799	1.61434	1.82826	1.81409
		p value (vs. HR)	LL vs. HR	0.640625	0.640625	0.640625	0.640625	0.84375	0.84375	0.742188	0.148438	0.546875	0.546875	0.546875	0.460938	0.3125	0.460938	0.945312	0.742188	0.382812	0.109375	0.109375	0.0234375	0.25	0.3125	0.078125	0.078125	0.25	0.148438	0.148438	0.742188	0.9375	0.75	0.25	0.445312	0.296875	0.4375	0.0625	0.578125	0.46875	0.28125	0.15625	0.15625
			LL vs. LR	0.742188	0.546875	0.84375	0.742188	1	0.382812	0.546875	0.460938	0.742188	0.640625	1	0.382812	0.25	0.0546875	0.3125	0.0390625	0.109375	0.25	0.195312	0.25	0.3125	0.109375	0.109375	0.195312	0.84375	0.382812	0.4375	0.382812	0.6875	0.578125	1	0.6875	0.109375	0.140625	0.125	0.1875	0.8125	0.640625	0.5625	0.125
			LL vs. HL	0.640625	0.3125	0.96875	0.148438	0.945312	0.546875	0.523438	0.84375	0.742188	0.234375	0.1875	0.0546875	0.375	0.664062	0.84375	0.460938	0.640625	0.109375	0.8125	0.945312	0.976562	0.03125	0.6875	0.3125	1	0.546875	0.0546875	0.148438	0.9375	0.3125	0.8125	0.21875	0.78125	0.3125	0.8125	0.84375	1	0.8125	0.25	0.5625
	Firing rate at middle stage
				Time bin
				1	2	3	4	5	6	7	8	9	10	11	12	13	14	15	16	17	18	19	20	21	22	23	24	25	26	27	28	29	30	31	32	33	34	35	36	37	38	39	40
	Trial type	Mean	HR	7.37295	7.55652	6.37509	7.3224	6.64357	7.86369	7.57439	8.25314	8.74437	8.19356	8.39918	8.61577	8.4444	8.32629	7.67691	8.44697	8.81483	9.06755	9.08344	9.18657	7.60269	7.841	12.0057	18.087	15.1756	15.3318	11.6437	9.06218	7.06453	4.48911	4.87718	3.4231	2.83654	2.03616	2.69177	2.49175	2.82868	2.88861	3.31269	2.81725
			LR	7.23576	9.06098	9.11659	8.77634	9.73807	7.59457	8.29128	7.30054	8.1291	10.5536	10.8579	9.32816	9.81298	8.73062	8.62513	10.2707	9.38656	8.46853	9.0337	9.03236	9.00902	9.36561	12.3849	21.2801	18.2886	15.9792	11.3536	9.28546	6.72083	4.85972	4.27308	4.16923	3.44254	3.10265	2.59231	3.78143	2.8018	2.53901	3.02864	3.6529
			HL	9.21202	7.27588	8.87362	9.16018	11.2349	8.52004	8.57676	10.3646	10.9895	10.3805	11.8143	12.9561	12.1102	11.4547	11.3832	11.9657	11.3801	13.0204	11.3146	8.92201	11.2616	10.2748	14.1264	22.8485	21.2363	19.1206	12.0413	8.60797	7.37334	4.81613	4.15547	4.46467	3.85118	3.00491	2.42901	2.84584	2.88903	2.32217	2.74313	2.40727
			LL	9.11434	9.25006	8.73502	7.70694	7.94965	8.34934	10.0262	9.58092	10.0758	10.1629	9.09657	10.7271	11.3233	12.395	11.9302	11.1407	11.4235	11.9733	11.5111	10.9928	9.52547	11.3176	14.1671	23.3977	21.7652	17.6929	10.9869	9.21293	7.39565	5.15331	4.30983	4.37165	4.54784	3.59618	3.20843	3.34736	3.13805	2.99836	3.2909	2.75213
		s.e.m.	HR	2.58503	2.55226	2.16562	2.73104	2.06508	2.59615	2.44783	2.64478	2.85837	2.63713	2.85812	3.0145	3.03168	2.78583	2.81295	2.83263	2.99059	3.04826	3.04037	3.30672	3.09074	3.11388	3.62972	7.33823	6.11548	5.73203	5.3305	4.9406	4.14639	2.4415	2.70383	2.04505	1.85589	1.38858	1.89805	1.73497	1.918	2.17405	2.25617	1.74511
			LR	2.36391	2.7624	2.70834	2.64289	3.11161	2.5714	2.91605	2.7309	2.72926	3.47447	3.30808	2.9048	2.85043	2.73879	2.78545	3.38067	2.98686	2.66488	3.17192	3.19077	3.19965	3.25673	3.67834	7.85579	7.04888	6.30005	5.30925	4.89038	4.2922	2.70509	2.57905	2.4	2.05084	2.06633	1.79138	2.39147	1.91101	1.64428	2.16517	2.68352
			HL	3.37544	2.51731	3.21307	3.2549	3.90721	3.05099	3.01869	3.565	3.78738	3.84067	4.04226	4.15935	3.98688	4.15925	3.7715	3.94879	3.50316	4.47018	3.77102	3.21309	4.75865	4.11436	4.75363	7.84545	6.85171	6.23531	5.23075	4.66571	4.79693	2.91807	2.40733	2.70312	2.37193	2.07508	1.60646	1.63785	1.82682	1.69494	2.00514	1.36011
			LL	3.29405	3.43227	3.08173	2.62788	3.08997	3.0353	3.62038	3.95023	3.74105	3.48258	3.21484	3.79997	3.90004	4.16848	4.12725	3.86935	3.86305	4.07535	3.99653	3.97442	3.68907	4.37937	4.68575	8.10813	7.70401	6.28515	5.04815	5.05688	4.82568	3.11581	2.67352	2.67153	2.53853	2.35586	2.19353	2.16435	1.70184	1.88883	1.95742	1.79813
		p value (vs. HR)	LL vs. HR	0.903198	0.541626	0.760864	0.807739	0.890381	0.714844	0.714844	0.760864	0.638672	0.325806	0.454285	0.463135	0.561401	0.193726	0.00402832	0.148792	0.488708	0.0787308	0.807739	0.454285	0.855225	0.0386071	0.357544	0.561401	0.192985	0.794586	0.831287	0.934082	0.501587	0.733398	0.423828	0.322266	0.0341797	0.147461	0.27832	0.101562	0.831055	0.769531	0.909668	0.909668
			LL vs. LR	0.541626	0.760864	0.735352	0.42627	0.216309	0.714844	0.843018	0.890381	0.684814	0.42627	0.454285	0.488708	0.934082	0.118896	0.083252	0.679116	0.193726	0.172607	0.390991	0.325806	0.892578	0.229309	1	0.977966	0.794586	0.831287	0.758312	0.518555	0.30542	0.412598	0.700195	1	0.234985	0.62207	0.128906	0.733398	0.365234	0.203613	0.413086	0.735352
			LL vs. HL	0.903198	0.365479	1	0.6698	0.00402832	0.923035	0.572388	0.274536	0.3396	0.951538	0.0301514	0.295776	0.267578	0.569494	0.719727	0.846924	0.951538	0.357544	0.625732	0.0905762	0.339355	0.488708	0.6698	0.951538	0.586174	0.00860743	0.469039	0.623779	0.62207	0.637695	0.764648	0.921875	0.413086	0.370117	0.263672	0.413086	1	0.109375	0.126953	0.786865
	Firing rate at late stage
				Time bin
				1	2	3	4	5	6	7	8	9	10	11	12	13	14	15	16	17	18	19	20	21	22	23	24	25	26	27	28	29	30	31	32	33	34	35	36	37	38	39	40
	Trial type	Mean	HR	4.11265	4.36297	3.66226	4.47994	4.40341	4.31616	4.73387	4.61908	4.99497	5.81397	6.24456	5.90642	6.11176	6.25481	6.37285	6.84861	7.33856	7.82265	7.65753	8.55568	8.48228	8.27897	11.0241	14.9123	14.602	13.6939	10.2653	7.77766	6.31144	4.82413	4.68486	4.05752	3.8065	3.6234	4.30647	5.17553	5.696	6.18707	6.37694	7.36744
			LR	5.88931	5.29897	6.19855	5.48338	5.92871	7.39775	6.38629	5.69651	6.30177	6.00696	7.31966	7.92254	7.24322	7.87239	8.47371	8.1837	9.12947	9.27643	9.70705	9.48232	9.8797	9.65792	13.7135	15.4572	13.6649	12.7425	8.85997	7.28209	5.78613	4.18119	5.30414	3.68073	3.97375	3.32089	4.2723	3.14627	3.424	3.68857	4.30885	4.27304
			HL	6.25501	5.79999	6.5972	7.25759	9.39339	8.50031	7.63192	8.31343	8.72536	8.43388	10.3053	9.41466	9.84173	9.75828	10.6699	10.5502	10.6652	12.1907	11.5818	12.2497	15.2821	15.6352	17.9941	22.103	19.9488	14.0671	9.05473	8.38347	7.66951	5.1956	5.24208	4.45163	4.13604	4.70321	4.05065	4.01593	4.23506	3.446	3.60363	2.81817
			LL	7.14653	7.61133	8.28189	9.12396	9.14304	9.78461	9.81283	10.5986	10.9556	11.9225	12.9301	12.7386	12.9716	12.8608	13.3073	13.4595	13.9536	15.1043	15.2915	14.8132	15.0673	16.1136	17.4908	20.6685	19.2313	14.7753	10.2261	8.03238	6.06529	4.42573	4.56819	4.68639	4.70042	4.59555	5.22755	5.80213	6.8875	7.28343	7.7566	8.02277
		s.e.m.	HR	1.19228	1.31974	1.15843	1.08577	1.15023	1.07028	1.1462	1.09211	1.16547	1.39721	1.37024	1.26468	1.22162	1.30522	1.39005	1.57583	1.72605	1.84455	1.91254	2.12336	2.01397	2.04015	2.65072	4.60909	4.37681	4.0911	3.40767	2.85227	2.26526	1.51568	1.29179	0.999272	0.841966	0.904491	1.19809	1.49134	1.60617	1.85453	2.00407	2.27377
			LR	1.25004	1.09613	1.1752	1.24311	1.21831	1.77594	1.7055	1.374	1.35374	1.56496	1.65652	1.7839	1.5313	1.68457	1.91606	1.89126	2.25123	2.21088	2.2048	2.07821	2.22692	2.39934	3.14804	4.44828	4.27794	3.71698	3.05654	2.96208	2.18217	1.14068	1.65688	1.07453	1.12442	1.06011	1.18764	1.20999	1.1451	1.29126	1.35578	1.29747
			HL	1.5461	1.44293	1.79098	1.78835	2.17864	2.2504	1.88166	2.04067	2.12609	2.20249	2.56435	2.16803	2.24087	2.50351	2.51168	2.55599	2.60429	2.92915	2.93486	2.74825	3.26852	3.70071	3.84187	5.13544	4.57363	3.66842	2.71742	2.54302	2.50979	1.60734	1.25401	1.08673	0.861241	1.05728	1.06239	0.898995	1.13515	0.690814	1.0437	0.7283
			LL	1.59666	1.80702	1.86991	2.10916	2.20763	2.34784	2.30553	2.4487	2.41928	2.81441	2.9435	2.93175	2.92678	2.83878	3.0048	3.05945	3.26441	3.51195	3.49508	3.27248	3.31385	3.80109	4.13176	5.12058	5.11423	4.0611	3.09279	2.89646	2.42571	1.53406	1.39942	1.35638	1.31556	1.39809	1.68618	1.96499	2.30289	2.52462	2.61809	2.68684
		p value (vs. HR)	LL vs. HR	0.00796804	0.0258972	0.000142393	0.00509708	0.0155449	0.00576093	0.00623203	0.000515869	0.000188083	0.0319039	0.00437232	0.0175482	0.0769026	0.00756712	0.0130548	0.00172232	0.0268289	0.00134783	0.00597135	0.00272263	0.00257987	0.00569121	0.0797063	0.00965617	0.0124903	0.131841	0.585775	0.339089	0.0141185	0.0110623	0.452807	0.854173	0.95899	0.495776	0.923441	0.452807	0.215153	0.241863	0.890889	0.52588
			LL vs. LR	0.0270231	0.071276	0.155273	9.69312e-05	0.0796953	0.0566118	0.00165559	0.00034134	0.00170762	0.00133999	0.00626305	0.0305636	0.00804783	0.00148469	0.00135036	0.0001633	0.00643213	0.00138582	0.00424485	0.00244439	0.0196016	0.000547483	0.0483	0.0256694	0.00167732	0.221548	0.265865	0.358103	0.142778	0.353913	0.626597	0.905333	0.721247	0.540087	0.866446	0.0761946	0.164802	0.0779878	0.721247	0.492769
			LL vs. HL	0.190076	0.255564	0.0495911	0.220963	0.938675	0.300978	0.267927	0.130255	0.154148	0.00840122	0.0227995	0.0594172	0.11795	0.0600147	0.0136418	0.0332847	0.0474694	0.0820345	0.0798065	0.0224642	0.730831	0.489385	0.526999	0.321708	0.509354	0.626074	0.0998654	0.786937	0.107469	0.280384	0.247337	0.436299	0.657566	0.480227	0.885378	0.656685	0.318491	0.289452	0.0297513	0.0122186
	ROC value at early stage
				Time bin
				1	2	3	4	5	6	7	8	9	10	11	12	13	14	15	16	17	18	19	20
	Trial types compared Trials compared Trials compired	Mean	LL vs. HR	0.50865	0.527491	0.524103	0.52595	0.541922	0.510493	0.575262	0.520243	0.544249	0.553037	0.542988	0.588894	0.55239	0.508618	0.505152	0.506238	0.505562	0.535569	0.50219	0.518131
			LL vs. LR	0.48924	0.518197	0.522708	0.505207	0.533241	0.529903	0.601149	0.538181	0.555768	0.556556	0.549786	0.575917	0.525798	0.499532	0.498008	0.500808	0.502352	0.530438	0.498786	0.511964
			LL vs. HL	0.501222	0.539092	0.523216	0.513408	0.515607	0.540913	0.538968	0.501199	0.468217	0.487486	0.472751	0.535211	0.45824	0.422202	0.490717	0.479477	0.502221	0.489273	0.49182	0.501652
		s.e.m.	LL vs. HR	0.0348754	0.0274623	0.0324992	0.0346438	0.0267521	0.0288825	0.0356417	0.02162	0.0147852	0.0117561	0.026591	0.0263008	0.0303946	0.0153041	0.0136333	0.00851627	0.00859147	0.0199485	0.0170267	0.0210397
			LL vs. LR	0.0363586	0.0270485	0.0302554	0.0303184	0.0279441	0.0244546	0.0313884	0.0212567	0.0202753	0.0263852	0.0251057	0.0230387	0.0350581	0.020303	0.0119632	0.0104013	0.0121934	0.0145969	0.0205771	0.0183811
			LL vs. HL	0.0204956	0.0142417	0.0262242	0.0276301	0.0183826	0.0186508	0.0193739	0.0214091	0.0244219	0.0283972	0.0128906	0.0112886	0.0267124	0.0145953	0.019951	0.00869802	0.00965857	0.00860423	0.0218737	0.0175148
		p value	LL vs. HR	0.404196	0.404196	0.404196	1	0.0831391	0.404196	0.0831391	0.0831391	0.00574981	0.00574981	0.0831391	0.00574981	0.0831391	0.404196	0.404196	1	1	0.404196	0.68951	1
			LL vs. LR	1	1	0.404196	1	0.404196	0.404196	0.00574981	0.0831391	0.00574981	0.0831391	0.0831391	0.00574981	0.404196	1	0.0831391	0.68951	1	0.0200466	0.404196	1
			LL vs. HL	1	0.0001554	1	1	0.404196	0.0831391	0.0831391	0.404196	0.404196	1	0.0831391	0.0831391	0.0831391	0.00574981	0.68951	0.0831391	1	0.0200466	1	0.682051
	ROC value at middle stage
				Time bin
				1	2	3	4	5	6	7	8	9	10	11	12	13	14	15	16	17	18	19	20
	Trial types compared Trials compared Trials compired	Mean	LL vs. HR	0.521994	0.527342	0.506962	0.516837	0.517054	0.517446	0.539834	0.535785	0.534197	0.52163	0.527972	0.53215	0.538248	0.49341	0.499766	0.501342	0.536925	0.515746	0.510607	0.503132
			LL vs. LR	0.510436	0.500607	0.48592	0.517057	0.514114	0.489162	0.528962	0.518396	0.535656	0.519241	0.510401	0.510064	0.510353	0.497087	0.508558	0.499243	0.515217	0.501748	0.515487	0.50125
			LL vs. HL	0.515734	0.504749	0.488551	0.498107	0.504984	0.474917	0.501099	0.498553	0.499706	0.514352	0.501016	0.487787	0.472296	0.486336	0.506165	0.499087	0.516093	0.511064	0.512556	0.511208
		s.e.m.	LL vs. HR	0.0215435	0.0213389	0.0223989	0.0239286	0.019669	0.018648	0.0238401	0.0173406	0.0195283	0.0189774	0.0160988	0.0207236	0.0261396	0.013536	0.0159999	0.0110983	0.0152937	0.0103679	0.0155166	0.0101618
			LL vs. LR	0.0164605	0.0150458	0.0191585	0.0218225	0.0179397	0.0240743	0.0208234	0.0161142	0.0190125	0.0190668	0.0152399	0.0225633	0.0300794	0.00980995	0.0171683	0.01354	0.0109534	0.00717484	0.00843898	0.0127917
			LL vs. HL	0.0128353	0.0136176	0.0132877	0.0119999	0.012951	0.013583	0.0121541	0.0156092	0.0162539	0.0152075	0.0153785	0.0128227	0.016224	0.0144835	0.0130648	0.00746133	0.0117257	0.0138775	0.0114339	0.00903515
		p value	LL vs. HR	0.761724	0.752685	0.343356	0.524335	0.761724	0.343356	0.761724	0.538078	1	0.343356	0.538078	0.768361	0.122051	0.768361	0.343356	0.324775	0.0027583	0.0201323	1	0.505773
			LL vs. LR	1	0.524335	0.524335	0.761724	1	1	0.538078	0.0594995	0.0201323	0.343356	0.343356	0.538078	0.357379	0.122051	0.196133	0.324775	0.343356	0.324775	0.0416869	0.324727
			LL vs. HL	0.524335	1	0.111409	0.524335	0.196133	0.538078	0.538078	0.211262	0.524335	0.343356	0.761724	0.211262	0.357379	0.768342	0.524335	0.324727	0.761703	0.0980365	1	0.324775
	ROC value at late stage
				Time bin
				1	2	3	4	5	6	7	8	9	10	11	12	13	14	15	16	17	18	19	20
	Trial types compared Trials compared Trials compired	Mean	LL vs. HR	0.540983	0.554666	0.554432	0.569438	0.575004	0.577211	0.579216	0.578168	0.573151	0.58159	0.575631	0.571899	0.548435	0.512307	0.489069	0.509752	0.526732	0.515552	0.503158	0.501327
			LL vs. LR	0.504971	0.517361	0.520791	0.549481	0.560995	0.55903	0.562432	0.55921	0.563384	0.555684	0.555064	0.543259	0.551594	0.522852	0.4831	0.49227	0.507544	0.518139	0.535087	0.524333
			LL vs. HL	0.472362	0.506582	0.490012	0.516243	0.503769	0.499399	0.529609	0.510054	0.536112	0.521049	0.481268	0.483419	0.483732	0.503632	0.440849	0.460746	0.501588	0.4994	0.506973	0.558223
		s.e.m.	LL vs. HR	0.0161373	0.0156292	0.0193451	0.0190671	0.0210762	0.0221028	0.0229407	0.0225444	0.0231985	0.0219564	0.0219623	0.0244359	0.0197377	0.0185444	0.016937	0.0170799	0.0162266	0.01505	0.0194876	0.019097
			LL vs. LR	0.00941063	0.011874	0.0126745	0.0139892	0.0177905	0.0164595	0.016783	0.0146182	0.0188067	0.0162861	0.0188198	0.0204421	0.0193911	0.0200914	0.0230482	0.0247905	0.0254079	0.0235702	0.0232529	0.0239391
			LL vs. HL	0.0287533	0.0244118	0.0268459	0.0256774	0.0257398	0.0265151	0.0223684	0.0190324	0.0184748	0.0206384	0.02023	0.0179607	0.0239954	0.0207693	0.0256318	0.0275252	0.0245288	0.0255397	0.0265724	0.0265212
		p value	LL vs. HR	0.00248627	7.55501e-05	0.0364456	0.000175645	0.000480225	0.0364456	0.104082	5.8761e-05	0.00103153	7.55501e-05	0.000480225	0.0191825	0.000480225	0.0191754	0.000513063	0.0931684	0.146481	0.811911	0.0191807	0.160865
			LL vs. LR	0.389339	0.0504217	0.00947248	3.52117e-05	0.000455356	9.83022e-05	1.50358e-05	1.92082e-06	3.52117e-05	0.0306867	0.000537457	0.0286132	9.83022e-05	0.0286117	0.255883	0.660503	0.2643	0.255883	0.0263546	0.665092
			LL vs. HL	0.669083	0.0286132	0.19558	0.278285	0.0167357	0.0306898	0.000537521	0.00246253	4.80836e-06	0.0167336	0.669089	0.51693	0.0306898	0.00413952	0.649051	0.827223	0.504608	0.820669	1	0.000175698
