# Supplementary material for: Acquisition of auditory discrimination mediated by different processes through two distinct circuits linked to the lateral striatum
Source: eLife. 2025 Jul 11;13:RP97326. doi: 10.7554/eLife.97326 (PMC12252547; doi:10.7554/eLife.97326)
Supplement: Figure 7—figure supplement 3—source data 1. [file elife-97326-fig7-figsupp3-data1.xlsx]

## Sheet: Figure 7–figure supplement 3A
Figure 7–figure supplement 3A	Data	Mean firing rate and auROC values of CO-LL neurons at the early, middle, and late stages.
	Softwear	matlab ver 2019
	Group	Number of CO-LL neurons in the aDLS; 3, 9, and 12 neurons for early, middle, and late stages, respectively.
	Stats
	Firing rate at early stage
				Time bin
				1	2	3	4	5	6	7	8	9	10	11	12	13	14	15	16	17	18	19	20	21	22	23	24	25	26	27	28
	Trial type	Mean	HR	0.721501	1.08225	1.68831	1.50553	1.89033	1.41895	0.966811	0.606061	1.75084	2.44829	1.62097	3.39586	3.91053	5.28139	5.8153	3.59307	4.06445	5.18038	2.32323	2.04906	3.23713	2.81385	3.37662	3.8961	3.39586	1.66426	0.966811	2.00577
			LR	1.17037	2.01905	0.8	1.54074	3.02646	2.23704	2.28571	1.80741	1.75238	2.12275	2.71111	1.97037	2.28571	2.75979	2.23704	2.77037	3.50476	1.86667	3.3418	2.70476	0.8	2.28571	1.06667	1.33333	1.06667	3.50476	1.75238	2.01905
			HL	2.20823	2.82674	1.93049	1.47552	1.75506	1.69051	2.58112	2.78304	1.57483	2.24482	1.93049	2.86928	2.56506	4.07301	4.12862	3.43961	2.84311	3.76732	2.96443	2.61471	2.90734	2.00779	1.70656	2.30637	2.03427	3.06672	2.92041	2.1877
			LL	1.4354	1.35951	1.30772	1.39648	1.4447	1.4892	1.35951	1.28719	1.22241	1.37979	2.27621	1.53716	1.42046	2.07803	2.01325	2.15775	2.77997	2.33553	2.81161	2.66698	2.04093	2.39674	3.57822	2.85229	2.8597	2.96516	3.12279	2.33566
		s.e.m.	HR	0.36846	0.55269	1.05773	0.527721	1.24626	0.46657	0.741568	0.606061	0.905968	1.1456	0.30705	1.33552	3.22274	1.69735	2.86853	3.35779	1.97117	2.97437	1.16491	1.22681	1.43021	1.76288	2.11546	2.27482	1.33552	0.374563	0.741568	1.06636
			LR	0.693454	1.01436	0.8	0.772078	0.520136	1.7118	1.18952	0.946758	0.886073	0.522751	1.42014	1.45072	1.18952	0.286427	1.7118	2.23792	1.77215	1.86667	1.33071	1.6566	0.8	1.18952	1.06667	1.33333	1.06667	1.77215	0.886073	1.01436
			HL	0.593231	0.380338	1.11037	0.386673	1.20991	0.519858	0.601906	1.08688	0.418259	1.04853	1.11037	0.933548	0.793971	1.98469	2.28082	1.11789	1.61889	1.72434	1.53913	0.610527	1.10753	0.397019	0.292136	1.23448	0.872057	1.03724	0.803973	0.417544
			LL	0.618909	0.6817	1.05238	0.438725	0.650537	0.962197	0.6817	0.249785	0.405858	0.170123	0.593011	0.165027	0.357469	0.38291	0.522368	0.852176	0.518209	0.718631	1.33041	0.417247	0.1027	1.17626	0.584838	0.947002	1.00137	0.384846	1.48958	1.39656
		p value (vs. HR)	LL vs. HR	0.25	0.75	0.75	1	0.75	1	0.25	0.5	0.5	0.5	0.5	0.25	0.75	0.25	0.5	1	0.5	0.5	0.75	0.75	0.75	1	0.75	0.75	0.5	0.25	0.25	0.75
			LL vs. LR	0.5	0.75	0.5	0.75	0.25	0.5	0.5	0.5	0.75	0.5	1	1	0.75	0.25	1	1	0.75	0.75	1	1	0.5	1	0.25	0.25	0.25	0.75	0.5	1
			LL vs. HL	0.25	0.25	0.25	1	0.75	0.75	0.25	0.5	0.75	0.75	0.75	0.5	0.5	0.5	0.5	0.25	1	0.25	1	1	0.5	1	0.25	0.5	0.25	1	1	1
	Firing rate at middle stage
				Time bin
				1	2	3	4	5	6	7	8	9	10	11	12	13	14	15	16	17	18	19	20	21	22	23	24	25	26	27	28
	Trial type	Mean	HR	2.48187	2.44778	2.28113	2.53163	2.41549	2.37639	2.20561	2.66652	2.23698	1.36235	3.8015	7.59317	5.1907	4.98248	4.71642	5.01712	4.99651	4.17791	3.70597	3.33297	3.41373	3.45443	2.85172	3.09811	2.52032	2.76007	2.54991	2.52602
			LR	2.77218	2.45034	2.36481	2.43005	2.83553	3.12597	2.58028	2.1285	2.2328	2.56252	3.88989	5.9502	5.15603	5.54078	5.03433	4.58782	4.72335	3.70472	3.16255	3.92208	3.91999	4.09308	3.9644	3.35536	2.85109	3.03749	3.39443	2.99217
			HL	2.90743	2.38987	1.72996	2.52169	1.93697	1.74538	1.47916	2.21938	1.89467	2.59782	3.25336	6.91733	5.35224	5.56174	5.17173	4.85647	4.01151	4.22065	3.30099	2.50454	1.73707	2.20378	1.63229	2.14096	1.86221	2.2316	2.38173	2.89377
			LL	1.81166	1.97681	2.00814	1.86472	2.09533	1.79249	2.68965	2.01637	1.98282	2.15384	2.11878	5.1462	5.07534	5.18709	4.39262	4.72378	4.97145	4.65606	3.6165	4.32644	4.29636	3.80605	3.01706	4.18599	3.72946	3.76312	3.37856	3.43845
		s.e.m.	HR	0.765436	0.827906	0.787041	0.684756	0.763792	0.682663	0.697913	0.930171	0.700083	0.465856	2.2573	3.9974	2.62239	2.05855	1.83273	1.6037	1.26992	1.05945	1.06719	0.849428	0.594407	0.845841	0.880836	0.688173	0.573892	0.647251	0.607741	0.630361
			LR	0.964562	0.707747	0.631605	0.799261	1.15887	0.86269	1.09319	0.556439	0.951098	0.818266	0.928584	2.50817	1.56016	1.52166	1.20568	1.55226	1.13173	0.785961	0.565262	1.05592	1.06264	1.22956	1.2387	0.665549	0.940919	0.790757	1.15166	0.902242
			HL	1.03193	0.614306	0.43038	0.588114	0.679325	0.559513	0.589126	0.430998	0.637483	0.531236	1.3103	3.83965	2.63804	2.1341	1.91625	1.76295	1.3461	0.915793	0.871304	0.758545	0.618873	0.664515	0.50971	0.645401	0.535351	0.535991	0.88983	0.969911
			LL	0.726413	0.691625	0.752246	0.699405	0.612116	0.728485	0.954184	0.666094	0.765933	0.716085	0.792445	1.99845	1.87108	1.45646	0.903146	1.02982	0.840568	0.887456	1.07572	1.31372	1.30388	0.975935	1.10966	1.07348	1.09707	1.30034	1.28507	1.19012
		p value (vs. HR)	LL vs. HR	0.164062	0.425781	0.25	0.0976562	0.410156	0.300781	0.742188	0.0976562	0.570312	0.0703125	0.3125	0.359375	1	0.570312	1	1	0.910156	0.570312	0.910156	0.570312	0.652344	0.476562	1	0.300781	0.0976562	0.496094	0.425781	0.359375
			LL vs. LR	0.121094	0.359375	0.640625	0.25	0.550781	0.0742188	0.652344	0.652344	0.820312	0.496094	0.0117188	0.570312	0.910156	0.742188	0.570312	0.734375	0.820312	0.359375	0.734375	0.820312	0.425781	0.652344	0.128906	0.425781	0.164062	0.820312	0.570312	0.820312
			LL vs. HL	0.0546875	0.359375	0.945312	0.148438	0.652344	0.8125	0.109375	0.652344	1	0.570312	0.164062	0.570312	0.910156	0.652344	0.910156	1	0.496094	0.570312	0.84375	0.0546875	0.0117188	0.0078125	0.300781	0.0078125	0.0390625	0.128906	0.359375	0.496094
	Firing rate at late stage
				Time bin
				1	2	3	4	5	6	7	8	9	10	11	12	13	14	15	16	17	18	19	20	21	22	23	24	25	26	27	28
	Trial type	Mean	HR	1.82052	1.69636	1.77888	1.79921	1.6529	1.18386	1.26487	1.50246	1.44363	1.47121	1.65754	2.80915	3.88942	3.44829	3.75255	3.15454	3.31986	2.60329	2.79953	1.98669	2.14272	2.27208	2.12185	2.0879	1.89767	1.92875	1.63071	1.99104
			LR	1.19444	1.38791	0.661793	1.42057	1.37817	1.6194	1.08333	1.66179	1.05994	1.14766	1.56433	2.60136	3.14279	3.51267	2.9576	2.59698	2.75439	2.27729	2.56433	3.2963	1.47661	2.31433	1.93519	3.07797	2.27729	2.85088	2.39669	2.01316
			HL	2.33985	3.00299	1.83632	2.41393	1.71639	3.03474	2.04267	2.55943	2.50299	1.85484	2.16701	2.9589	4.83632	4.71904	4.61763	3.0268	4.63791	4.34514	3.75784	3.27989	2.11498	1.94479	2.92363	3.66701	3.391	3.65202	2.8425	4.8328
			LL	1.45029	1.4242	1.23747	1.41955	1.876	1.70176	1.56348	1.43506	1.71475	2.27454	1.90888	2.00149	2.25075	2.59201	3.27241	3.12097	2.87118	2.67323	3.04358	3.13086	2.32943	3.01693	2.84855	2.63109	2.89707	3.308	3.03264	3.31453
		s.e.m.	HR	0.296181	0.324053	0.261309	0.222599	0.301606	0.20068	0.214406	0.215353	0.234487	0.251133	0.40508	0.963313	0.985167	0.74727	0.782519	0.632054	0.644033	0.566386	0.548439	0.407788	0.516092	0.494593	0.489589	0.556261	0.469045	0.355999	0.394751	0.560065
			LR	0.343864	0.484288	0.206978	0.609445	0.610028	0.44905	0.471628	0.823768	0.377383	0.521135	0.66515	0.999223	1.21478	0.662614	0.796097	0.851667	0.740922	0.706522	1.1183	1.21118	0.522629	0.977863	1.08819	1.24508	0.853415	1.15592	0.719937	0.535796
			HL	0.678769	0.860562	0.612405	0.873169	0.614813	1.1916	1.11223	0.880781	1.30433	0.572101	0.505522	1.16103	1.44859	1.16982	1.66263	1.38039	0.921156	1.12496	0.974969	1.16018	0.730522	0.630839	0.827936	0.881748	1.00092	1.11821	0.877015	1.05758
			LL	0.269123	0.25411	0.277801	0.292451	0.310195	0.306107	0.365209	0.252022	0.414573	0.59362	0.392681	0.450449	0.513556	0.45263	0.626304	0.47964	0.484019	0.356877	0.525006	0.4694	0.435805	0.438482	0.398492	0.392848	0.576517	0.575644	0.543632	0.637438
		p value (vs. HR)	LL vs. HR	0.129395	0.569336	0.0336914	0.0493164	0.62207	0.15625	0.717285	0.969727	0.58252	0.109863	0.151367	0.206055	0.012207	0.518555	0.30127	0.764648	0.845703	0.518555	0.30127	0.00244141	0.625	0.109863	0.0639648	0.174805	0.0424805	0.00488281	0.00146484	0.0424805
			LL vs. LR	0.636719	0.700195	0.114746	0.677246	0.225586	0.969727	0.203613	0.519531	0.380371	0.225586	0.233398	0.577148	0.556641	0.240234	0.805664	0.764648	0.850098	0.211914	0.30127	0.898438	0.129395	0.203613	0.0771484	0.412598	0.0522461	0.376953	0.275391	0.240234
			LL vs. HL	0.266113	0.0771484	0.519531	0.62207	0.791016	0.380371	0.791016	0.469727	0.969727	0.124512	0.733398	0.519531	0.0136719	0.0922852	0.749512	0.365234	0.0341797	0.30127	0.62207	0.469727	0.569336	0.151367	0.791016	0.339355	0.733398	1	0.96582	0.339355
	ROC value at early stage
				Time bin
				1	2	3	4	5	6	7	8	9	10	11	12	13	14
	Trial types compared Trials compared Trials compired	Mean	LL vs. HR	0.529043	0.481925	0.491031	0.523306	0.473205	0.478245	0.410326	0.444177	0.448577	0.531554	0.484785	0.514249	0.513571	0.542414
			LL vs. LR	0.493827	0.49564	0.450687	0.476826	0.471898	0.510447	0.501834	0.51379	0.49046	0.507971	0.517733	0.563788	0.518564	0.520148
			LL vs. HL	0.476512	0.480708	0.498897	0.471429	0.479257	0.481758	0.452548	0.460232	0.487197	0.48677	0.489563	0.535233	0.510904	0.516368
		s.e.m.	LL vs. HR	0.00785796	0.00250383	0.00884747	0.0077949	0.0246913	0.00638585	0.0353647	0.0388853	0.0213183	0.010635	0.0107159	0.0306726	0.0188169	0.0173028
			LL vs. LR	0.0192824	0.0176784	0.0100323	0.00299207	0.0298732	0.0372078	0.00338743	0.0206478	0.0335349	0.0449639	0.0168034	0.0123361	0.0315113	0.0464672
			LL vs. HL	0.0161438	0.012863	0.00850746	0.00106389	0.018526	0.0320653	0.0285357	0.0151667	0.0230407	0.00987131	0.00753721	0.0115281	0.00580686	0.0331331
		p value	LL vs. HR	0.1	0.1	0.7	0.1	0.7	0.1	0.1	0.7	0.1	0.1	0.1	0.7	0.7	0.1
			LL vs. LR	0.7	0.7	0.1	0.1	0.7	0.7	0.7	0.7	0.7	0.7	0.7	0.1	0.7	0.7
			LL vs. HL	0.7	0.7	0.7	0.1	0.7	0.7	0.7	0.1	0.7	0.7	0.7	0.1	0.7	0.7
	ROC value at middle stage
				Time bin
				1	2	3	4	5	6	7	8	9	10	11	12	13	14
	Trial types compared Trials compared Trials compired	Mean	LL vs. HR	0.490116	0.491769	0.488464	0.500572	0.498822	0.454112	0.508877	0.501928	0.516433	0.511548	0.517784	0.516847	0.516248	0.522356
			LL vs. LR	0.487255	0.488698	0.483674	0.506795	0.492421	0.468774	0.49999	0.493373	0.501327	0.502024	0.512319	0.493909	0.501659	0.502215
			LL vs. HL	0.478331	0.489153	0.494733	0.510055	0.490735	0.47907	0.501743	0.501356	0.512188	0.520588	0.545997	0.537952	0.513952	0.518698
		s.e.m.	LL vs. HR	0.00915897	0.0086837	0.0128985	0.00991191	0.00999494	0.0296871	0.0281545	0.0297673	0.0217434	0.0203856	0.0154361	0.0121878	0.00949801	0.00731533
			LL vs. LR	0.00980326	0.0118978	0.00826172	0.0131309	0.00962893	0.0112728	0.0143153	0.0174664	0.0159309	0.0192269	0.0123808	0.0150171	0.0151051	0.0184259
			LL vs. HL	0.0100684	0.00814489	0.0120349	0.0122242	0.0105788	0.0183871	0.02087	0.0250542	0.0230741	0.0173856	0.0125123	0.0157966	0.0108469	0.0122966
		p value	LL vs. HR	0.709009	0.0360757	0.223529	0.709009	0.685068	0.223529	0.709009	0.223529	0.709009	0.223529	0.223529	0.223529	0.0360757	0.0360757
			LL vs. LR	0.709009	0.223529	0.223529	0.709009	0.709009	0.223529	0.709009	0.709009	0.709009	0.709009	0.0360757	0.223529	0.709009	0.223529
			LL vs. HL	0.223529	0.404319	0.223529	0.223529	0.709009	0.709009	0.404319	0.709009	0.223529	0.223529	0.0360757	0.0360757	0.223529	0.709009
	ROC value at late stage
				Time bin
				1	2	3	4	5	6	7	8	9	10	11	12	13	14
	Trial types compared Trials compared Trials compired	Mean	LL vs. HR	0.490583	0.497653	0.516687	0.506303	0.506864	0.496364	0.496075	0.49985	0.51113	0.515119	0.508192	0.517446	0.523502	0.522457
			LL vs. LR	0.491575	0.510327	0.508259	0.513173	0.510673	0.49876	0.472841	0.494289	0.506039	0.500684	0.521288	0.520284	0.515263	0.522779
			LL vs. HL	0.479696	0.510288	0.505751	0.50149	0.479343	0.459807	0.394418	0.452217	0.431792	0.435923	0.489525	0.481316	0.526719	0.499947
		s.e.m.	LL vs. HR	0.00678842	0.00424662	0.00992484	0.00728041	0.00739652	0.0104236	0.0093643	0.00953432	0.0115808	0.00590486	0.0114645	0.0134632	0.0130101	0.0103594
			LL vs. LR	0.013936	0.00600692	0.0126627	0.00849955	0.0171199	0.0174744	0.018999	0.0204396	0.0196069	0.0136135	0.0125052	0.0178582	0.0152467	0.0153186
			LL vs. HL	0.0229391	0.0144333	0.0244245	0.0216019	0.0414761	0.0340985	0.0435423	0.0451813	0.0514021	0.0535997	0.0403168	0.0411349	0.0220818	0.0289235
		p value	LL vs. HR	0.709009	0.0360757	0.223529	0.709009	0.223529	0.223529	0.709009	0.223529	0.709009	0.00189223	0.223529	0.223529	0.0360757	0.0360757
			LL vs. LR	0.477995	0.147083	0.147083	0.0285031	0.147083	0.147083	0.00901322	1	0.0285031	0.477995	0.0285031	0.0033823	0.0285031	0.0285031
			LL vs. HL	1	0.0285031	0.147083	0.147083	0.147083	1	0.147083	0.147083	1	1	0.0285031	1	0.0285031	0.477995

## Sheet: Figure 7–figure supplement 3B
Extended Data Fig. 8d	Data	Mean firing rate and auROC values of CR-LL neurons at the early, middle, and late stages.
	Softwear	matlab ver 2019
	Group	Number of CR-LL neurons in the aDLS; 40, 36, and 77 neurons for early, middle, and late stages, respectively.
	Stats
	Firing rate at early stage
				Time bin
				1	2	3	4	5	6	7	8	9	10	11	12	13	14	15	16	17	18	19	20	21	22	23	24	25	26	27	28	29	30	31	32	33	34	35	36	37	38	39	40
	Trial type	Mean	HR	2.56292	2.81842	2.93486	2.59732	2.67034	2.89663	2.80549	2.97262	3.0537	2.57966	3.32173	3.01471	3.07326	2.91153	3.28502	3.97763	3.67661	3.8595	4.20303	4.29283	4.50911	4.59242	4.08116	4.46293	4.6358	3.81394	3.13719	2.38713	2.35954	2.64591	2.53053	2.56472	2.46355	2.64714	2.86301	2.72222	2.17993	2.66706	2.58794	1.92658
			LR	1.81247	2.38602	1.93658	2.05379	2.70203	2.55901	2.86879	2.89215	3.05812	2.66099	2.94295	2.93116	3.39517	3.10077	3.18726	3.37385	3.59046	4.10654	4.38692	4.60749	4.77379	4.1892	4.77201	5.25934	5.07416	3.99393	2.6392	2.03619	1.96836	1.58911	1.68683	1.52163	1.73113	1.54298	1.71802	1.86811	1.57003	1.60535	1.86628	1.78987
			HL	3.26513	3.50144	3.29237	3.8436	3.79214	3.85789	3.95925	3.96073	4.22481	4.6248	4.11469	4.48216	5.02736	5.54531	5.04792	5.31632	6.16524	6.18146	7.07897	7.86219	7.79485	8.26206	9.1569	11.3116	11.8399	10.4575	9.05674	6.92659	6.20306	5.21805	4.53406	4.77563	4.70695	3.94101	3.21089	2.64203	2.74935	2.33228	1.99231	2.16424
			LL	4.67138	4.93715	4.75175	4.83006	4.94844	4.90215	5.17887	5.70317	5.61587	5.83969	5.66233	5.56369	6.17578	5.98449	6.52006	6.65151	7.12954	7.13447	8.32263	8.15961	8.3573	9.0265	9.19896	11.6444	12.8359	11.945	9.51948	7.6124	6.19064	6.35715	6.18711	5.70125	5.02014	5.07812	4.61076	4.1833	3.98845	4.28253	4.5974	4.55615
		s.e.m.	HR	0.349195	0.333675	0.328671	0.337765	0.350056	0.462868	0.388253	0.412723	0.387669	0.344089	0.537826	0.419096	0.467222	0.480484	0.59276	0.753027	0.926503	1.02073	1.14448	1.29231	1.61558	1.48864	1.20135	1.06195	1.13435	0.887263	0.674994	0.785878	0.939049	1.06486	0.898981	0.894444	0.692865	0.735633	0.779088	0.684497	0.601944	0.777338	0.799028	0.66865
			LR	0.208085	0.273469	0.299706	0.329593	0.370483	0.362516	0.458852	0.435399	0.455354	0.409972	0.42193	0.435131	0.559465	0.498718	0.622594	0.60169	0.815125	0.929961	1.3076	1.49342	1.66309	1.40849	1.31178	1.27212	1.11566	1.04328	0.640007	0.531727	0.620665	0.507413	0.608458	0.514213	0.478569	0.42309	0.414941	0.441384	0.427878	0.36688	0.432904	0.375226
			HL	0.514223	0.553595	0.483029	0.678444	0.609074	0.547232	0.614151	0.585319	0.589963	0.677545	0.597388	0.616099	0.647177	0.784251	0.730323	0.752877	0.903117	0.954098	1.13476	1.25154	1.24281	1.36606	1.6034	2.27601	2.38209	2.18463	1.97928	1.73497	1.62263	1.4552	1.27623	1.25939	1.22219	1.06468	0.683951	0.531605	0.477621	0.439527	0.360716	0.404655
			LL	0.725495	0.645439	0.591421	0.65842	0.641993	0.595927	0.678945	0.837628	0.880703	0.821609	0.864148	0.879338	0.869974	0.987158	1.06252	1.12122	1.33896	1.20274	1.38841	1.45054	1.56152	1.72985	2.05228	2.55	2.72267	2.58907	1.93167	1.75658	1.44743	1.4186	1.52048	1.31454	1.11763	1.11261	0.908574	0.838391	0.847016	1.17661	1.29662	1.37061
		p value (vs. HR)	LL vs. HR	0.0115053	0.00260517	0.0133889	0.00199126	0.00316528	0.00422607	0.00161143	0.00778079	0.00369949	0.000810335	0.0255622	0.0193465	0.0080985	0.00793752	0.0157499	0.0246557	0.00610618	0.0106565	0.00550793	0.00801471	0.00369991	0.00318424	0.00467406	0.000359845	0.000706946	0.000162858	0.000884116	0.000733979	0.000833735	0.00105312	0.00171347	0.00285119	0.00643319	0.00489014	0.0474694	0.0463952	0.0249347	0.130262	0.176599	0.00646623
			LL vs. LR	8.20457e-05	5.84473e-05	2.43688e-05	2.14514e-05	0.00467406	0.000428854	0.00177227	0.000285294	0.00481871	0.000538494	0.00654446	0.0128956	0.0161274	0.007038	0.00906522	0.010237	0.00778149	0.0170186	0.00165897	0.00245987	0.000941883	0.00149494	0.0107841	0.000269071	7.49027e-05	0.00121057	0.000176255	0.00375719	0.000618792	0.000471756	0.000296453	0.000276716	0.000780935	0.000317768	0.00129867	0.0187926	0.00396515	0.0167827	0.0262409	0.0377736
			LL vs. HL	0.00238365	0.000301109	4.92163e-05	0.0118635	0.0179963	0.00177635	0.0115417	0.000332118	0.00147834	0.0173532	0.00830409	0.0403796	0.0524107	0.635165	0.0213012	0.0805734	0.557802	0.184931	0.0598628	0.736846	0.914368	0.394628	0.220403	0.700459	0.264657	0.0921804	0.499323	0.135709	0.875162	0.0375085	0.019704	0.147176	0.494055	0.0535931	0.0541003	0.0566163	0.460266	0.109044	0.0377772	0.0572958
	Firing rate at middle stage
				Time bin
				1	2	3	4	5	6	7	8	9	10	11	12	13	14	15	16	17	18	19	20	21	22	23	24	25	26	27	28	29	30	31	32	33	34	35	36	37	38	39	40
	Trial type	Mean	HR	3.05334	3.12925	3.4691	3.65581	3.35249	3.58056	3.8921	3.60432	4.02045	4.19669	4.13351	3.91171	4.04348	4.05074	4.225	4.17594	4.85901	4.72097	5.16628	5.55636	5.45812	5.69131	5.00134	5.0878	4.28718	3.2062	2.88512	2.12994	2.11146	2.04924	2.15981	2.34324	2.67511	2.80085	3.17703	3.12706	2.87845	2.49312	2.82199	2.58469
			LR	2.3447	2.35496	2.78243	3.24137	3.41201	3.83399	3.78272	3.89363	3.83682	3.86741	3.59264	3.68715	3.54697	4.05387	3.8375	4.07328	4.63036	4.6078	4.99264	5.25764	5.75395	5.89419	5.07699	4.74234	4.15108	3.15037	2.19535	2.29899	1.55313	1.43971	1.47913	1.5192	1.71996	1.60079	1.3966	1.42697	1.66102	1.60822	1.63498	1.56234
			HL	3.34059	3.58583	3.99257	4.04458	4.29201	4.79185	4.40611	5.38359	5.24316	5.19565	5.07536	6.03477	5.78772	6.02957	5.55591	5.42022	6.10674	7.27826	6.92095	7.42589	7.00814	7.23862	8.00647	8.47949	9.27942	8.59	6.25614	4.91192	3.8368	3.42917	3.26809	2.90315	2.72241	2.60899	2.36532	1.74823	1.62435	1.65119	1.65019	1.51021
			LL	4.45983	4.66823	4.94599	4.99249	4.91542	5.23888	5.54336	5.48141	5.43584	5.40061	5.59516	6.23539	6.4874	6.17923	6.5659	6.63619	7.10325	6.94757	7.48404	7.231	7.18022	7.83788	8.23247	8.8751	9.91674	8.00438	6.39309	4.59051	4.0764	3.63994	3.32706	3.5356	3.59661	3.55694	3.44338	3.66644	3.57966	3.55523	3.15157	3.13547
		s.e.m.	HR	0.37883	0.411242	0.447033	0.577401	0.562499	0.583799	0.638813	0.513274	0.568861	0.606981	0.503555	0.537183	0.524177	0.543188	0.568516	0.593563	0.689858	0.725092	0.916208	0.979043	1.08166	1.23006	1.12561	1.15269	0.931205	0.704002	0.641739	0.648166	0.879429	0.888	0.937181	0.939357	0.944882	0.893991	0.931967	0.784322	0.763825	0.814943	0.918307	0.853949
			LR	0.32173	0.330857	0.410812	0.481794	0.568986	0.585309	0.684161	0.581859	0.566642	0.66935	0.580366	0.579046	0.554406	0.602653	0.5125	0.674398	0.731104	0.71801	0.80709	0.984101	1.06012	1.27895	1.11587	1.00932	0.904537	0.630499	0.470618	0.505021	0.464121	0.551507	0.406198	0.511438	0.57681	0.524786	0.464968	0.526301	0.45742	0.420433	0.376531	0.391336
			HL	0.522646	0.650115	0.695334	0.64806	0.632704	0.786214	0.826443	1.01942	0.972313	0.977003	0.97722	1.24423	1.2148	1.19299	1.18018	1.13106	1.10323	1.39241	1.29111	1.28123	1.27705	1.3644	1.50094	1.76335	2.3738	2.32218	1.88339	1.69895	1.41926	1.50045	1.47311	1.38644	1.26146	1.06201	0.759052	0.696556	0.466361	0.393928	0.385238	0.339742
			LL	0.694258	0.737054	0.798497	0.743656	0.875271	0.908106	0.9506	0.894767	0.877619	0.938151	0.944632	1.05765	1.12817	1.13722	1.24984	1.20299	1.21636	1.17055	1.29298	1.20498	1.27924	1.45182	1.64053	2.04559	2.60867	2.15334	1.67364	1.45572	1.40722	1.05674	0.974713	1.03789	1.11826	1.01264	1.02437	1.10926	1.04034	1.03185	0.959911	0.983363
		p value (vs. HR)	LL vs. HR	0.112565	0.123643	0.162041	0.200393	0.153419	0.0811811	0.302126	0.192241	0.385343	0.501873	0.353959	0.131499	0.214549	0.171682	0.219283	0.181746	0.244862	0.214549	0.232477	0.561044	0.309864	0.143962	0.168707	0.202773	0.0955323	0.0997412	0.135908	0.220638	0.0556502	0.0404203	0.171365	0.251769	0.374479	0.432205	0.765501	0.981832	0.803619	0.362355	0.875424	1
			LL vs. LR	0.0346085	0.0218052	0.0897454	0.112565	0.231822	0.593231	0.349895	0.350496	0.29252	0.279687	0.0915934	0.0301542	0.0637609	0.285362	0.168869	0.0927518	0.112111	0.162041	0.225491	0.148353	0.413957	0.353959	0.147176	0.0741273	0.0740045	0.0822065	0.01076	0.30817	0.0651124	0.025221	0.154661	0.202886	0.394863	0.308615	0.0964283	0.0619363	0.477936	0.400401	0.613893	0.837617
			LL vs. HL	0.0784783	0.00755715	0.102269	0.0295591	0.510384	0.441392	0.0346085	0.694231	0.99318	0.737025	0.259155	0.501866	0.0927518	0.804209	0.0826883	0.0191695	0.0797008	0.602051	0.561036	0.706134	0.587762	0.079666	0.730871	0.734236	0.602044	0.107185	0.605466	0.492849	0.0997985	0.427863	0.770228	0.509736	0.840065	0.401937	0.386805	0.0516433	0.0618657	0.151401	0.363758	0.124146
	Firing rate at late stage
				Time bin
				1	2	3	4	5	6	7	8	9	10	11	12	13	14	15	16	17	18	19	20	21	22	23	24	25	26	27	28	29	30	31	32	33	34	35	36	37	38	39	40
	Trial type	Mean	HR	3.27261	3.35731	3.02554	3.21527	3.17479	3.13638	3.16773	3.39752	3.37049	3.36646	3.37908	3.53429	3.48463	3.85675	4.3859	5.41649	6.43217	7.10398	6.68058	6.45188	5.86808	5.02326	4.4331	3.82531	3.06291	2.28645	1.61015	1.3409	1.06407	1.1722	1.27262	1.5001	1.70508	1.99015	2.17658	2.23036	2.07788	2.18778	2.26715	2.35633
			LR	2.45506	3.1886	2.81223	3.36093	2.60657	2.7809	3.22642	3.10903	2.8528	2.71976	3.43152	3.28783	3.67622	4.47626	4.41971	4.81048	6.18452	6.72027	6.60223	6.32482	5.24847	4.40964	4.03613	3.32021	2.22255	1.85239	1.50428	1.31582	0.848867	0.674478	0.968923	0.858615	1.09012	1.13259	1.28644	1.25482	1.18985	1.27818	1.43839	1.52603
			HL	2.65228	2.58497	3.21223	2.44966	2.66614	2.76135	2.85284	2.72247	3.303	3.64919	3.9119	4.26076	4.23312	4.92879	4.57652	5.09966	4.66207	4.76392	5.39919	5.84932	5.94638	5.70232	5.37912	5.03988	3.96568	2.96632	2.73829	2.37893	2.47221	2.10301	1.90415	1.90376	1.95162	1.70972	2.21266	1.92992	2.57075	2.52847	1.94584	2.16937
			LL	2.91804	2.85148	3.1217	3.24903	3.30959	3.65737	4.05886	4.04418	4.35676	5.17321	5.30303	5.57826	5.99891	6.43723	6.1477	5.96587	5.69885	5.58184	5.58293	5.58854	5.55993	5.68141	5.88678	5.47127	4.69873	4.53712	4.4082	4.34366	4.90187	5.04865	4.83622	4.88596	4.56588	4.21936	3.7368	3.3342	2.90346	2.35645	2.19582	1.82578
		s.e.m.	HR	0.454349	0.517897	0.440112	0.462492	0.445435	0.425455	0.449933	0.498117	0.479122	0.467895	0.497184	0.514425	0.502218	0.565192	0.655635	0.903551	1.28507	1.46453	1.30802	1.1855	1.04666	0.906218	0.906986	0.872454	0.846162	0.728523	0.572571	0.37457	0.268559	0.329032	0.332269	0.432743	0.574076	0.839313	0.996106	1.07689	1.06552	1.07474	0.980851	0.901177
			LR	0.46196	0.645893	0.544775	0.545071	0.4773	0.629135	0.578335	0.539545	0.436507	0.49255	0.594794	0.441566	0.615356	0.694391	0.739421	0.988813	1.16416	1.25688	1.31115	1.39315	1.02919	0.828281	0.765804	0.6622	0.801862	0.58793	0.439148	0.303594	0.233722	0.167042	0.26018	0.213964	0.248834	0.27365	0.379192	0.373821	0.315604	0.402267	0.41501	0.399367
			HL	0.475503	0.469561	0.56956	0.486079	0.404933	0.443851	0.440014	0.399039	0.524892	0.556737	0.657345	0.759297	0.637849	0.70964	0.654581	0.705113	0.761572	0.860186	0.897431	0.943881	1.0096	0.988612	1.08306	1.07019	0.911903	0.906479	0.770373	0.56524	0.616844	0.493613	0.450197	0.432709	0.535818	0.383519	0.455517	0.458256	0.499086	0.600992	0.341715	0.469855
			LL	0.402814	0.395989	0.473656	0.484512	0.478072	0.479503	0.537076	0.540503	0.533931	0.667063	0.70703	0.747242	0.845608	0.886147	0.756413	0.729922	0.692021	0.757523	0.748623	0.832154	0.835723	0.894032	1.06166	1.04523	1.04055	1.05958	0.997479	1.00951	1.22361	1.38716	1.43602	1.36924	1.26994	1.15063	1.04545	0.860848	0.752318	0.645448	0.659595	0.509627
		p value (vs. HR)	LL vs. HR	0.420769	0.391523	0.727448	0.97851	0.722892	0.590147	0.163424	0.143983	0.0476641	0.00538829	0.00101933	0.000734015	0.000300873	0.00160416	0.00737708	0.049122	0.0676079	0.277686	0.340314	0.632724	0.609583	0.1898	0.0188114	0.00457682	0.00660605	0.00650701	0.0108158	0.0564949	0.0035834	0.0115786	0.0167524	0.00905256	0.00750565	0.0055489	0.0143986	0.0298787	0.0416737	0.307897	0.248636	0.455852
			LL vs. LR	0.264776	0.879566	0.479911	0.845535	0.134037	0.0543274	0.17449	0.0351	0.0433995	0.000491119	0.00214523	0.00340974	0.00265843	0.00606927	0.00164478	0.0100775	0.124143	0.270025	0.186785	0.255657	0.0101642	0.0353483	0.019547	0.001051	3.83517e-05	0.00196975	0.0160018	0.0351589	0.00173121	0.000944231	0.00246099	0.000478581	0.00173309	0.00321758	0.00239773	0.0177078	0.0555071	0.177343	0.786397	0.950105
			LL vs. HL	0.061193	0.0642335	0.692576	0.00484828	0.034132	0.00976008	0.00484589	0.0143442	0.0314092	0.00659025	0.000390136	0.00374282	0.00217657	0.0583451	0.00509483	0.0305395	0.0358144	0.0128575	0.328603	0.952745	0.99342	0.775242	0.0960043	0.329819	0.0685883	0.00569281	0.0122698	0.0324267	0.0172729	0.0140205	0.023017	0.00377899	0.000602515	0.00500058	0.329664	0.0190168	0.897896	0.133671	0.14283	0.0191758
	ROC value at early stage
				Time bin
				1	2	3	4	5	6	7	8	9	10	11	12	13	14	15	16	17	18	19	20
	Trial types compared Trials compared Trials compired	Mean	LL vs. HR	0.53939	0.540095	0.540794	0.552143	0.554314	0.553507	0.560751	0.558863	0.570612	0.582078	0.58329	0.598836	0.625411	0.610504	0.596166	0.578458	0.556634	0.543945	0.53574	0.544777
			LL vs. LR	0.554808	0.560253	0.544389	0.549732	0.551991	0.557624	0.561311	0.566299	0.568325	0.580552	0.584457	0.590402	0.625091	0.620722	0.605966	0.598277	0.582719	0.562039	0.561547	0.551948
			LL vs. HL	0.528428	0.526272	0.519539	0.533327	0.525148	0.528135	0.511532	0.523768	0.513889	0.508489	0.501511	0.494453	0.516089	0.509165	0.518863	0.531691	0.520229	0.535763	0.529062	0.545754
		s.e.m.	LL vs. HR	0.0132959	0.0129318	0.0132702	0.0154082	0.0154337	0.0177822	0.0179976	0.0202971	0.0248517	0.0247166	0.0267444	0.0275572	0.0291158	0.0299505	0.0272151	0.027515	0.0245881	0.0219246	0.0228957	0.0233833
			LL vs. LR	0.0121393	0.0109355	0.0108263	0.0142615	0.0157703	0.0168412	0.0173272	0.0198709	0.0241608	0.0241004	0.0250521	0.0276878	0.0285365	0.0285733	0.0264768	0.0246215	0.020725	0.0199925	0.0197209	0.0201301
			LL vs. HL	0.00730993	0.00532249	0.00691505	0.00766559	0.00696804	0.00934961	0.00791795	0.00948647	0.0084845	0.00907608	0.0100782	0.0109427	0.012087	0.00972915	0.00924985	0.0119369	0.0138045	0.014374	0.0171704	0.0180186
		p value	LL vs. HR	0.000217294	0.000217294	0.00194911	0.000217294	3.9656e-05	3.9656e-05	0.000886767	0.00194911	0.000217294	0.00101422	0.00194911	0.000886767	1.12376e-05	0.000314472	8.50438e-06	0.000314503	0.0104452	0.0014802	0.0602115	0.021561
			LL vs. LR	3.9656e-05	8.64767e-09	0.000217294	6.15666e-06	3.9656e-05	0.000217294	3.9656e-05	0.00363733	0.00101422	3.9656e-05	0.000445385	0.000183756	0.000378941	0.000314503	5.63577e-05	5.63577e-05	5.63577e-05	0.000314472	0.00015146	8.50438e-06
			LL vs. HL	0.00403913	1.43067e-05	0.00101422	6.15666e-06	0.00101422	0.00403913	0.413483	0.0401535	0.218981	0.684509	0.303396	1	0.144161	0.0927779	0.0927779	0.0567782	0.201357	0.00322363	0.0602115	0.0104452
	ROC value at middle stage
				Time bin
				1	2	3	4	5	6	7	8	9	10	11	12	13	14	15	16	17	18	19	20
	Trial types compared Trials compared Trials compired	Mean	LL vs. HR	0.520506	0.521277	0.528649	0.527048	0.517947	0.530364	0.536765	0.538247	0.535797	0.529809	0.538937	0.555115	0.568982	0.556497	0.544777	0.532429	0.520669	0.510351	0.521877	0.509403
			LL vs. LR	0.533542	0.533024	0.52689	0.524578	0.53243	0.54408	0.537451	0.547065	0.546317	0.538117	0.536945	0.556018	0.570267	0.558451	0.549576	0.540438	0.535638	0.548492	0.539278	0.528021
			LL vs. HL	0.512709	0.516525	0.505751	0.503746	0.5007	0.502325	0.506612	0.515751	0.505367	0.502582	0.507608	0.498095	0.499977	0.508778	0.511232	0.512887	0.524427	0.530894	0.545076	0.530606
		s.e.m.	LL vs. HR	0.0133212	0.0172492	0.0184261	0.019191	0.0202955	0.0210152	0.020651	0.0216099	0.0227532	0.02411	0.0224129	0.0277514	0.0316622	0.0294373	0.0276711	0.0254382	0.0259417	0.0260631	0.027556	0.0268269
			LL vs. LR	0.0133792	0.0158474	0.0180032	0.0199703	0.02081	0.0200264	0.0217053	0.0229855	0.0223571	0.0238921	0.0234733	0.028344	0.0324302	0.0277554	0.0248969	0.0235063	0.0241613	0.0220505	0.0258545	0.0222002
			LL vs. HL	0.00821072	0.00937006	0.00665699	0.00937119	0.0099665	0.00951252	0.00994363	0.00781538	0.00992342	0.00906832	0.0103419	0.0109114	0.0124465	0.0111533	0.0117352	0.0189498	0.0217535	0.0228233	0.0214688	0.0176302
		p value	LL vs. HR	0.389339	0.389339	0.195584	0.669089	0.665104	0.0840504	0.0840504	0.195584	0.0840504	0.389339	0.0306898	0.19558	0.0504217	0.271746	0.0137697	0.0710563	0.829847	0.504612	0.504612	0.504612
			LL vs. LR	0.0840504	0.669086	0.389339	0.195584	0.195584	0.000537521	0.389339	0.195584	0.00246253	0.0306898	0.195584	0.128438	0.0286132	0.0152946	0.00155775	0.111119	1	0.00303457	0.504612	0.497032
			LL vs. HL	1	0.0840504	0.669089	0.832114	1	0.389339	0.00947248	0.389339	0.389339	0.389339	0.0840504	1	0.665104	0.497032	0.824191	0.820665	0.497032	0.264318	0.655191	0.655188
	ROC value at late stage
				Time bin
				1	2	3	4	5	6	7	8	9	10	11	12	13	14	15	16	17	18	19	20
	Trial types compared Trials compared Trials compired	Mean	LL vs. HR	0.490367	0.506061	0.503099	0.514421	0.527472	0.538787	0.546098	0.526141	0.499049	0.496378	0.504435	0.535796	0.54379	0.550483	0.554894	0.550292	0.549936	0.539158	0.522196	0.496423
			LL vs. LR	0.494618	0.499113	0.51093	0.513757	0.539035	0.528108	0.536108	0.535538	0.499938	0.510759	0.523597	0.540803	0.56221	0.549281	0.567665	0.562657	0.559381	0.546015	0.526045	0.510437
			LL vs. HL	0.511346	0.517701	0.5134	0.520869	0.528137	0.534213	0.530765	0.513746	0.515737	0.508718	0.491693	0.510649	0.500778	0.515558	0.53386	0.531916	0.544357	0.519933	0.49267	0.482612
		s.e.m.	LL vs. HR	0.0116233	0.011179	0.0112949	0.0116291	0.0118177	0.0127104	0.0122355	0.0135569	0.0178338	0.0189073	0.0163229	0.0133335	0.0135601	0.0163618	0.0168467	0.0174763	0.0179619	0.0174791	0.0146822	0.012911
			LL vs. LR	0.0112711	0.0109685	0.0116246	0.0121024	0.0118977	0.0126714	0.0139078	0.0146114	0.0162074	0.0161901	0.0156676	0.0129668	0.0134317	0.0170388	0.0172002	0.0161024	0.0152189	0.0141434	0.012911	0.0107726
			LL vs. HL	0.00741261	0.00950443	0.00901841	0.00908388	0.00988014	0.00864118	0.0121264	0.0129694	0.00991739	0.00772019	0.0101577	0.0114103	0.0125548	0.0134532	0.0164772	0.0157891	0.0129972	0.0135627	0.0129405	0.0126734
		p value	LL vs. HR	0.267608	0.340567	0.428839	0.0579588	0.00702592	3.94401e-05	0.000148036	0.00156925	0.0812644	0.114194	0.340567	3.08936e-05	0.00586795	0.0644161	0.244463	0.0191782	7.53576e-05	0.134356	0.870829	0.103885
			LL vs. LR	0.295958	0.765611	0.00450929	0.0171059	1.83512e-06	0.000629043	4.05415e-06	0.000202227	0.17885	0.00104065	0.00104065	0.000169537	1.58308e-07	0.0369681	0.000441507	7.07409e-05	0.000107385	0.0253925	0.0192637	0.279222
			LL vs. HL	3.15435e-08	2.38291e-05	0.000541036	1.62405e-05	0.00169341	6.69493e-09	4.05424e-06	4.05432e-06	0.00058503	0.00696165	0.0358579	0.000901242	0.00798507	0.00367913	4.02709e-06	0.000748512	8.85152e-09	0.000844895	0.27099	0.878511
