# Supplementary material for: Acquisition of auditory discrimination mediated by different processes through two distinct circuits linked to the lateral striatum
Source: eLife. 2025 Jul 11;13:RP97326. doi: 10.7554/eLife.97326 (PMC12252547; doi:10.7554/eLife.97326)
Supplement: Figure 7—source data 1. [file elife-97326-fig7-data1.xlsx]

## Sheet: Fig. 7A
Fig. 7A	Data	Firing rate and auROC values of the pVLS CO-HR neurons at the early, middle, and late stages.
	Group	Number of CO-HR neurons in the pVLS; 4, 21, and 24 neurons for early, middle, and late stages, respectively.
	Softwear	matlab ver 2019
	Stats
	Firing rate at early stage
				Time bin
				1	2	3	4	5	6	7	8	9	10	11	12	13	14	15	16	17	18	19	20	21	22	23	24	25	26	27	28
	Trial type	Mean	HR	2.12195	0.942059	1.57586	2.09963	2.95476	2.11158	2.05231	1.74752	1.33268	1.71482	4.30929	3.93407	3.63509	3.22985	2.44404	2.84504	2.73343	2.18546	2.76346	3.30184	2.63802	3.41927	2.64996	2.99783	3.22105	2.8878	2.6234	1.8849
			LR	1.92042	1.14191	2.23831	1.56631	2.11905	1.25688	1.20027	1.16313	1.75984	1.4243	1.89257	5.0557	3.31014	2.27799	1.66435	1.89083	1.76239	2.16303	2.11141	1.85115	1.4243	1.87226	1.39634	2.91195	2.10303	2.62456	1.8841	1.92552
			HL	1.84343	1.26263	0.629293	0.580808	0.555556	0.30303	1.13636	1.46263	0.780808	0.780808	5.29899	7.92727	7.11717	2.52121	3.40303	2.92525	4.1101	2.56566	2.21818	2.89596	3.50606	4.14444	4.97374	4.02222	4.97374	4.87677	3.77778	4.52525
			LL	2.18045	2.53759	0.93515	1.0119	1.35182	1.63221	1.19048	1.22024	2.15539	2.20238	3.26441	8.84712	2.8869	1.27506	2.81015	1.92513	1.58521	2.95426	1.53039	2.1037	3.26911	2.75063	2.65664	1.17325	1.81078	2.05357	1.30482	1.25
		s.e.m.	HR	1.07745	0.533854	1.07773	1.20378	1.3295	1.15837	0.849155	0.773292	0.615987	0.788392	1.77156	1.85309	1.24756	1.38867	1.09456	1.18613	1.07796	0.732499	1.12145	1.27638	0.937663	0.97975	0.794692	1.46085	1.07059	0.670538	0.814644	0.755002
			LR	0.991328	0.661414	1.25714	1.13974	0.884292	0.480546	0.643779	0.852411	1.0056	0.602026	0.892954	2.49702	1.89187	1.12138	1.20777	0.615585	1.17694	1.01465	1.13229	1.14048	0.964615	1.05064	0.430752	1.2916	1.3879	1.55157	1.08381	1.12334
			HL	1.30948	0.726641	0.234137	0.335963	0.555556	0.30303	0.78608	0.632184	0.274645	0.274645	2.12215	3.23131	3.46521	0.653905	1.17126	0.880672	1.18331	0.665901	0.675044	0.812669	0.907579	1.81656	2.07265	1.5573	2.07265	1.70775	1.31155	1.38636
			LL	0.714318	1.09889	0.251894	0.791913	0.663522	0.716159	0.400774	0.996468	1.53241	0.856398	1.11416	4.0921	1.47764	0.414281	2.11978	0.866489	0.344811	1.12026	0.629486	0.850633	1.7479	1.91593	1.91956	1.00549	0.778179	1.82327	0.985684	0.991865
		p value (vs. HR)	HR vs. LR	0.875	0.875	0.25	0.125	0.375	0.375	0.125	0.125	0.625	0.875	0.125	0.25	0.625	0.625	0.25	0.625	0.875	0.875	0.875	0.125	0.125	0.375	0.25	1	0.625	0.875	0.625	1
			HR vs. HL	0.625	0.375	0.625	0.375	0.125	0.375	0.25	0.375	0.375	0.25	0.625	0.25	0.125	0.625	0.625	1	0.125	0.875	0.875	1	0.625	0.625	0.625	0.625	0.625	0.375	0.25	0.125
			HR vs. LL	0.875	0.25	1	0.125	0.125	0.625	0.375	0.25	1	0.625	0.875	0.125	0.125	0.375	1	0.625	0.375	0.625	0.25	0.625	0.875	0.875	1	0.125	0.25	0.875	0.375	0.5
	Firing rate at middle stage
				Time bin
				1	2	3	4	5	6	7	8	9	10	11	12	13	14	15	16	17	18	19	20	21	22	23	24	25	26	27	28
	Trial type	Mean	HR	2.35561	2.49473	2.71678	2.4026	2.61458	2.82093	2.53318	2.87732	2.38024	2.90486	21.3147	17.5011	10.0036	8.0492	7.49947	7.73243	6.80534	6.55904	6.65706	6.536	6.66442	6.6508	6.92728	6.57241	5.42576	5.30359	4.76763	5.35302
			LR	2.91301	2.34346	2.82837	2.57327	2.33509	2.71817	2.83061	2.82009	2.81971	3.15556	16.8042	18.5195	9.16936	7.14144	6.62876	6.25489	5.89689	5.48953	5.52724	5.71284	6.04888	5.40528	4.38241	4.08181	4.23895	4.59205	5.52126	4.89071
			HL	1.88806	2.58801	3.29176	2.77325	3.97105	2.1653	1.81463	1.79698	2.23845	1.89443	19.2076	18.3707	9.98972	6.07208	6.71059	6.48899	7.03914	6.19472	6.83222	6.9738	5.90262	8.1206	6.76989	7.12211	6.9525	6.1391	5.74538	6.02078
			LL	2.82539	2.82866	2.73701	2.93261	2.61618	2.52354	2.15282	2.53352	2.21859	2.25388	14.1135	15.908	7.89993	5.24566	5.7829	5.51536	5.51597	4.77118	4.22939	4.056	4.26274	4.12604	4.14815	3.18296	4.23193	4.95827	4.58757	4.10636
		s.e.m.	HR	0.528541	0.586507	0.63872	0.428651	0.603179	0.536774	0.612706	0.64133	0.65108	0.597514	5.43803	4.40014	2.80503	2.17067	1.95626	1.93724	1.97936	1.79171	1.65048	1.56119	1.52879	1.63586	1.46948	1.45389	1.30872	1.17938	1.2213	1.35044
			LR	0.606469	0.442083	0.688358	0.592301	0.608818	0.777643	0.665254	0.623792	0.666475	0.636571	4.7672	5.01864	2.97428	2.37292	1.9894	2.06439	1.76063	1.54982	1.57533	1.70353	1.57828	1.55711	1.43303	1.2534	1.10283	1.14094	1.32027	1.26454
			HL	0.433835	0.636229	0.724644	0.689176	0.892785	0.415252	0.571036	0.372729	0.423777	0.454394	4.98703	4.57836	2.94442	1.89345	1.83995	1.92285	1.77916	1.72243	1.843	1.87034	1.44379	1.87033	1.76293	1.69943	1.56328	1.50556	1.42189	1.35651
			LL	0.639428	0.817212	0.628143	0.721757	0.600233	0.735832	0.503444	0.610703	0.500924	0.482902	4.25231	4.47268	2.26895	1.55872	1.65513	1.66005	1.4212	1.37472	1.00085	1.22787	1.24191	1.01512	1.19586	0.805912	1.19688	1.32239	1.09727	0.981566
		p value (vs. HR)	HR vs. LR	0.0791693	0.550292	0.848383	0.715124	0.433048	0.217172	0.390492	1	0.20453	0.501591	0.0354661	0.794337	0.715145	0.130545	0.0581863	0.00706599	0.156004	0.0792955	0.149178	0.262681	0.232226	0.0117378	0.00101883	0.00061791	0.0250935	0.0822084	0.478125	0.217241
			HR vs. HL	0.1923	0.601213	0.497882	0.765198	0.0629514	0.121904	0.0536343	0.0152223	0.930756	0.0853173	0.575486	0.903168	0.851925	0.0208117	0.0987409	0.0734509	0.95842	0.273575	0.916946	0.986134	0.414005	0.169775	0.881293	0.454889	0.0793217	0.663947	0.262722	0.741251
			HR vs. LL	0.638881	0.95842	0.940481	0.525653	0.741251	0.169743	0.295878	0.243201	0.940481	0.0680347	0.00803443	0.0228086	0.169775	0.00186575	0.0853409	0.00165765	0.139622	0.020802	0.00413721	0.0011537	0.00413721	0.00209761	0.000592762	0.00061791	0.149178	0.375445	0.689346	0.0792146
	Firing rate at late stage
				Time bin
				1	2	3	4	5	6	7	8	9	10	11	12	13	14	15	16	17	18	19	20	21	22	23	24	25	26	27	28
	Trial type	Mean	HR	4.05099	3.88285	3.96862	3.9222	3.72798	3.61889	3.3685	3.97778	3.85507	3.65156	22.4081	18.9616	11.7334	9.55674	8.03391	8.76098	8.58099	8.20643	8.29263	8.47741	8.32918	8.21015	8.20305	8.37915	8.15718	8.43313	7.7859	7.58535
			LR	3.59127	4.25331	4.45503	4.08949	4.34061	4.02381	3.31812	2.7004	2.76653	3.46693	22.2044	20.8157	9.02976	5.8373	7.86045	6.22751	5.91534	5.44841	6.54167	5.48743	6.36793	6.11	6.67063	4.93122	4.48677	3.72222	3.90497	4.65783
			HL	4.53318	2.35031	3.63966	3.60075	3.31559	2.94059	2.22608	5.04321	3.39275	2.92306	20.9979	17.5498	11.9024	7.59799	9.64605	7.51201	7.14969	9.11133	7.61133	7.18981	8.11287	9.38106	8.72652	7.3793	6.61034	8.88261	6.95128	7.80313
			LL	3.72847	3.81136	3.57677	3.35228	3.4438	3.87267	3.37383	3.18014	3.79147	3.54591	16.9941	15.1557	8.92246	5.94962	5.87435	5.68736	5.78091	5.76843	5.53594	5.81664	5.40726	5.21312	5.63359	5.24242	5.12156	4.47015	4.95622	4.91338
		s.e.m.	HR	0.658154	0.619113	0.719363	0.743337	0.69771	0.743904	0.62888	0.765383	0.738844	0.65983	4.50476	4.22195	2.63677	2.05363	1.81723	1.96847	1.89752	1.82197	2.02255	2.11139	2.05979	1.89852	2.09403	2.02037	1.96776	2.11473	2.0026	1.87037
			LR	0.897141	0.853153	0.84549	0.754458	0.882336	0.939245	0.671285	0.612948	0.635096	0.795852	5.78503	4.67821	2.03423	1.37476	1.81499	1.13565	1.42231	1.25529	1.64821	1.10761	1.33375	1.51817	1.51476	1.40709	1.11063	1.27362	0.893672	1.12552
			HL	0.846636	0.569407	0.631771	0.683734	0.827889	0.681071	0.660166	1.32103	0.929023	0.701989	4.46703	3.98383	2.94618	2.20393	2.27302	1.66552	1.83076	2.25295	1.83892	2.05055	2.11865	2.30644	2.16101	1.82219	1.83709	2.00647	1.78719	1.86805
			LL	0.62218	0.74415	0.704472	0.673601	0.683445	0.638205	0.548977	0.67969	0.743312	0.695674	4.60135	3.33063	1.78874	1.18546	1.10755	1.07273	1.03472	0.998054	1.06078	1.11053	0.984659	1.02695	1.11959	1.00794	1.02314	0.898301	0.972379	0.961339
		p value (vs. HR)	HR vs. LR	0.775052	0.423663	0.375772	0.819202	0.843273	0.720983	0.808087	0.0119274	0.253049	0.920336	0.0864763	0.954431	0.0370045	0.00167307	0.931694	0.0829798	0.00427473	0.00814617	0.081343	0.0184102	0.0455003	0.022271	0.0718606	0.000468898	0.00014447	7.14429e-05	0.00245462	0.0244041
			HR vs. HL	0.875126	0.0129246	0.637313	0.749442	0.337999	0.113743	0.0680165	0.563297	0.136001	0.217995	0.520296	0.137355	0.668235	0.00245713	0.830316	0.277605	0.0974906	0.988601	0.0974564	0.0515744	0.230092	1	0.819193	0.170241	0.0718461	0.710318	0.485112	0.567709
			HR vs. LL	0.391342	0.607052	0.407347	0.161513	0.429067	0.315526	0.886403	0.0278069	0.819202	0.501926	0.00664189	0.00350216	0.0455003	0.00723749	0.109599	0.00167307	0.0515879	0.0486749	0.0396725	0.0974906	0.0396725	0.022271	0.0555837	0.00619372	0.0298904	0.00167307	0.0674638	0.0208032
	ROC value at early stage
				Time bin
				1	2	3	4	5	6	7	8	9	10	11	12	13	14
	Trial types compared Trials compared Trials compired	Mean	HR vs. HL	0.494545	0.543328	0.55223	0.515107	0.526905	0.428816	0.472801	0.476638	0.478587	0.512858	0.473813	0.506428	0.472133	0.452747
			HR vs. LR	0.514814	0.509632	0.51199	0.531128	0.502278	0.526883	0.505073	0.5274	0.519652	0.542909	0.525207	0.525961	0.533967	0.50111
			HR vs. LL	0.480448	0.526506	0.510649	0.518667	0.485455	0.480891	0.533825	0.500406	0.510084	0.543033	0.497593	0.533691	0.529633	0.523841
		s.e.m.	HR vs. HL	0.0111164	0.0318962	0.0274761	0.0140897	0.0185271	0.0186928	0.0199269	0.0241021	0.0126446	0.0327393	0.0136073	0.0304675	0.0343712	0.0139586
			HR vs. LR	0.0127268	0.00950635	0.0192095	0.00614547	0.00577882	0.00992415	0.0215615	0.0183133	0.0245769	0.0282118	0.0202171	0.0157196	0.0208358	0.0265245
			HR vs. LL	0.0100274	0.0163733	0.0105527	0.00374327	0.0112966	0.0205412	0.0098481	0.0257878	0.0230005	0.0235177	0.0431088	0.0235773	0.0262801	0.0209301
		p value	HR vs. HL	1	0.314286	0.314286	0.314286	0.314286	0.0285714	0.314286	0.314286	0.314286	1	0.0285714	1	0.314286	0.0285714
			HR vs. LR	0.314286	0.314286	1	0.0285714	1	0.0285714	1	0.314286	0.314286	0.314286	0.314286	0.314286	1	1
			HR vs. LL	0.314286	0.0285714	0.314286	0.0285714	0.314286	0.314286	0.0285714	0.314286	0.314286	1	0.314286	1	0.314286	1
	ROC value at middle stage
				Time bin
				1	2	3	4	5	6	7	8	9	10	11	12	13	14
	Trial types compared Trials compared Trials compired	Mean	HR vs. HL	0.496334	0.488913	0.496334	0.515729	0.504952	0.504754	0.512033	0.518022	0.505161	0.49461	0.500241	0.499818	0.47743	0.478212
			HR vs. LR	0.498493	0.493169	0.507783	0.498255	0.49437	0.535775	0.521099	0.538383	0.524772	0.523336	0.522965	0.546647	0.523121	0.507151
			HR vs. LL	0.49784	0.499784	0.498684	0.509964	0.503459	0.579166	0.54176	0.543971	0.527459	0.543662	0.546873	0.561497	0.519167	0.519725
		s.e.m.	HR vs. HL	0.0102974	0.0100321	0.00744789	0.00727002	0.0112145	0.0194418	0.0170652	0.0170956	0.017354	0.0143437	0.0135991	0.0143705	0.0133524	0.0188953
			HR vs. LR	0.00634027	0.00763529	0.00599444	0.00754693	0.00645806	0.0283032	0.0108661	0.00842253	0.0111306	0.0143232	0.0101347	0.0117647	0.00679169	0.0134205
			HR vs. LL	0.00715005	0.0101432	0.00673192	0.00792858	0.00752796	0.0283749	0.0138726	0.0110746	0.0128603	0.0127206	0.0141065	0.013995	0.0121544	0.0121775
		p value	HR vs. HL	0.788012	0.788012	0.788012	0.00198629	0.0496552	0.788012	0.788012	0.162039	0.0496446	0.404523	0.404523	0.788012	0.0496552	0.788012
			HR vs. LR	0.788012	0.788012	0.0496552	0.788012	0.162039	0.0496552	0.162039	0.000255233	0.0496552	0.0496552	0.0114845	2.42544e-05	0.0114845	0.162039
			HR vs. LL	0.788002	0.577375	0.788012	0.577375	0.788012	2.42544e-05	0.0114845	0.000255233	0.162039	0.0114845	0.00198629	0.000255233	0.162039	0.0496552
	ROC value at late stage
				Time bin
				1	2	3	4	5	6	7	8	9	10	11	12	13	14
	Trial types compared Trials compared Trials compired	Mean	HR vs. HL	0.516556	0.507667	0.526255	0.506639	0.511551	0.530229	0.522402	0.512231	0.511645	0.525612	0.506885	0.500961	0.503779	0.504064
			HR vs. LR	0.503801	0.49633	0.491674	0.52963	0.504369	0.52331	0.545321	0.518792	0.556134	0.529516	0.53496	0.541287	0.57796	0.554865
			HR vs. LL	0.50549	0.514279	0.505217	0.516658	0.503749	0.584254	0.547978	0.545057	0.541084	0.532917	0.553175	0.545586	0.557815	0.540044
		s.e.m.	HR vs. HL	0.0149568	0.0125938	0.0130656	0.0144907	0.0105695	0.0151379	0.0152599	0.0143566	0.0156719	0.0132836	0.0144812	0.0189952	0.0166427	0.0127591
			HR vs. LR	0.0144313	0.0124405	0.0147219	0.0135343	0.0152074	0.0347203	0.0218918	0.0193304	0.0134862	0.0163946	0.0190743	0.013156	0.0111175	0.0162991
			HR vs. LL	0.00621078	0.00684499	0.00483515	0.00671169	0.0076828	0.0289361	0.0191573	0.0152932	0.0162502	0.0143496	0.0163332	0.0163447	0.0155088	0.0153436
		p value	HR vs. HL	0.115037	1	0.0167663	0.115037	0.597284	0.00156193	0.000222572	0.295118	0.295118	0.0352906	0.604468	0.604479	0.604479	0.604479
			HR vs. LR	0.604479	0.115037	0.798054	0.00156193	1	0.0352963	0.0084402	0.115037	2.43322e-05	0.295118	0.115037	0.00156193	6.32694e-09	0.00156193
			HR vs. LL	1	0.0084402	0.604479	0.0352963	1	0.000222572	0.0084402	0.0352963	0.00156193	0.295118	0.0352963	0.0084402	0.0084402	0.0084402

## Sheet: Fig. 7B
Fig. 7B	Data	Averaged firing rate of CO-HR neurons at HR and LL trial
	Group	Number of CO-HR neurons in the pVLS; 4, 21, and 24 neurons for early, middle, and late stages, respectively.
	Softwear	matlab ver 2019
	Stats	Wilcoxon signed-rank test; early; signedrank = 4, p = 0.875000000000000 middle; Z = 2.763233172515509, p = 0.005723186500070 late; Z = 2.885714285714286, p = 0.003905265073652
	Early stage						Middle stage						Late stage
			Fring rate at each trial						Fring rate at each trial						Fring rate at each trial
			HR	LL					HR	LL					HR	LL
	# of neurons	1	0.922619	1.18421			# of neurons	1	0.91954	0.714286			# of neurons	1	15.9028	16.0976
		2	1.45833	1.96429				2	0.52381	0.386473				2	2.63052	3.19277
		3	5.7277	6.04167				3	5.71429	2.22222				3	2.47967	2.02532
		4	3.80282	2.36111				4	7.77778	4.88304				4	2.62195	3.10127
								5	13.6612	7.01058				5	13.8506	8.56481
								6	8.61472	2.62821				6	5.60386	4.5614
								7	29.632	25.5769				7	5.04831	4.14474
								8	2.25108	3.01282				8	3.01587	0.949074
								9	9.89177	10.0641				9	11.5476	10.7176
								10	3.72294	3.01282				10	1.90196	0.539906
								11	2.18615	2.24359				11	20.9333	11.2387
								12	13.0348	7.67361				12	42.4889	19.8423
								13	12.7363	6.94444				13	18.3778	12.3198
								14	40.1741	29.5833				14	10.3556	3.35586
								15	3.00995	0.798611				15	0.533333	0.225225
								16	1.69154	2.08333				16	2.75556	1.68919
								17	15.5224	11.0417				17	5.63786	2.22944
								18	8.10945	4.89583				18	12.6749	10.2381
								19	4.62687	12.7083				19	32.6337	21.3203
								20	3.33333	0.902778				20	10.5144	2.77056
								21	2.26368	0.833333				21	12.9424	11.5584
														22	5.65844	16.0606
														23	4.25926	9.7619
														24	5.61728	4.37229

## Sheet: Fig. 7C
Fig. 7C	Data	Cumulative probability of the proportion of CO-INC neurons in the pVLS at the early, middle, and late stages
	Group	Number of CO-HR neurons in the pVLS; 4, 21, and 24 neurons for early, middle, and late stages, respectively.
	Softwear	matlab ver 2019
	Dependent variable	Calculated number of event-related neurons
	Stats	Kruskalwallis test; χ2 = 51.1139, p = 0.00000000000795724659189233 post hoc Tukey–Kramer test; early vs. middle; p = 0.000000000958495616210086 early vs. late; p = 0.001618339426585 middle vs. late; p = 0.00063893731361575
			Cumulative probability of the proportion
	Learning stage	early	1.36986
		early	2.73973
		early	2.73973
		early	0
		early	0
		early	1.36986
		early	0
		early	2.73973
		early	1.36986
		early	0
		early	0
		early	0
		early	0
		early	0
		early	0
		early	0
		early	1.36986
		early	0
		early	1.36986
		early	2.73973
		middle	6.36364
		middle	7.27273
		middle	6.36364
		middle	7.27273
		middle	7.27273
		middle	6.36364
		middle	8.18182
		middle	4.54545
		middle	9.09091
		middle	7.27273
		middle	7.27273
		middle	6.36364
		middle	10
		middle	6.36364
		middle	9.09091
		middle	6.36364
		middle	9.09091
		middle	6.36364
		middle	9.09091
		middle	10
		late	2.63158
		late	3.15789
		late	6.31579
		late	3.68421
		late	4.21053
		late	3.68421
		late	5.26316
		late	3.15789
		late	3.15789
		late	4.21053
		late	2.63158
		late	4.21053
		late	2.63158
		late	5.78947
		late	3.68421
		late	3.68421
		late	4.21053
		late	4.21053
		late	4.21053
		late	4.21053

## Sheet: Fig. 7D
Fig. 7D	Data	Firing rate and auROC values of the pVLS CR-HR neurons at the early, middle, and late stages.
	Group	Number of CR-HR neurons in the pVLS; 11, 22, and 41 neurons for early, middle, and late stages, respectively.
	Softwear	matlab ver 2019
	Stats
		Firing rate at early stage
				Time bin
				1	2	3	4	5	6	7	8	9	10	11	12	13	14	15	16	17	18	19	20	21	22	23	24	25	26	27	28	29	30	31	32	33	34	35	36	37	38	39	40
		Mean	HR	6.42068	6.58212	6.97025	8.00232	8.32333	9.11235	8.64652	7.32623	7.98456	8.79925	9.05311	8.39341	7.45347	6.95493	7.57662	8.63374	8.65711	7.60238	6.89985	5.70151	6.43843	6.18948	5.77963	7.87449	7.86194	6.70082	6.20814	4.86459	3.81402	3.13287	3.38734	2.49213	2.70323	3.1151	2.61764	2.536	2.89351	2.42153	1.47157	2.54914
			LR	6.79719	7.37199	8.07935	7.32925	7.42086	6.21701	7.05404	7.20187	8.76049	7.75164	6.67603	6.97566	6.09712	4.50621	5.69514	5.79837	6.14785	7.28634	7.27991	6.69895	6.48792	5.0228	5.60241	7.9118	8.75075	7.68573	6.00012	4.80015	3.52994	3.22152	3.22541	2.38759	2.95257	2.12859	1.86196	2.10905	1.88845	1.87499	1.28796	1.90734
			HL	4.27184	6.43846	4.60298	4.89422	5.75083	5.58281	5.71526	6.2542	6.32248	6.34186	5.92163	6.13833	6.22984	6.74525	6.89101	7.97861	11.1572	13.7639	11.5481	8.27216	6.78496	7.20044	6.12376	8.1749	8.76833	10.0691	7.96998	5.42617	3.05223	3.80595	4.12015	3.15835	2.96624	2.93922	2.53784	3.22265	1.98582	2.30765	1.24908	1.8603
			LL	6.68486	4.45558	5.35315	6.25425	5.84353	6.33652	5.52241	7.74004	6.4241	6.91412	6.08883	6.94867	7.91381	7.33333	6.51517	8.24626	7.86149	7.78336	7.37721	7.64645	6.4764	5.43428	6.83926	9.16525	8.12771	8.28218	6.29865	4.35683	3.6781	2.97981	3.73784	2.2993	2.3799	2.8772	2.61317	2.69077	2.0537	1.4753	2.09188	2.2317
		s.e.m.	HR	1.64972	1.4597	2.03136	2.2497	2.23415	2.86261	2.11273	1.66436	1.9339	2.11009	2.1728	1.90498	1.71157	1.69358	1.71773	2.41586	2.65492	1.6812	1.44586	1.30083	1.54197	1.46487	1.47452	2.93201	3.01919	2.61101	2.825	2.32997	2.40461	1.78464	1.84999	1.50001	1.57115	1.5644	1.389	1.19495	1.53631	1.33843	0.728058	1.46286
			LR	1.47576	1.61207	1.81972	1.65612	1.8538	1.48195	1.64409	1.82804	2.75245	2.20808	1.8049	1.79112	1.2919	1.128	1.13464	1.17506	1.26363	1.35422	1.62591	1.39089	1.60118	1.0638	1.56476	2.96076	3.17858	2.42967	3.03475	2.63509	1.86537	1.83853	1.59	1.43573	1.57442	1.27725	1.02054	1.04237	0.957373	0.793113	0.700214	0.866905
			HL	1.19954	1.27439	1.34881	0.924392	1.09747	1.45924	1.33547	1.35597	1.02411	1.25842	1.54335	1.0128	0.951669	1.03809	1.29315	1.94084	3.66968	4.07052	3.77648	1.74819	1.40515	1.41657	1.38693	2.86372	2.80723	3.56862	3.14609	2.3897	1.26889	1.8797	2.13089	1.31365	1.71076	1.22476	1.2088	1.87122	1.09648	1.12348	0.540717	1.30971
			LL	1.84292	1.0244	1.00857	0.966614	1.26099	1.14414	1.01615	1.21011	1.36932	1.54487	1.32354	1.29055	1.3811	1.22959	0.986646	1.38987	1.54107	1.75034	1.87952	1.66863	1.80476	1.33746	1.31125	3.50028	3.14036	2.49541	2.78133	2.43582	1.83338	1.55738	1.84303	1.14553	1.20749	1.25382	1.27912	1.52515	0.912493	0.646001	0.86124	0.938443
		p value (vs. HR)	HR vs. LR	0.831055	0.413086	0.160156	0.556641	0.413086	0.320312	0.519531	0.700195	0.831055	0.375	0.206055	0.232422	0.27832	0.0830078	0.320312	0.193359	0.413086	0.577148	0.577148	0.320312	0.577148	0.206055	0.375	0.769531	0.320312	0.27832	0.96582	0.700195	0.734375	0.845703	0.652344	0.734375	0.322266	0.375	0.3125	0.164062	0.382812	0.742188	0.6875	0.9375
			HR vs. HL	0.123047	1	0.27832	0.206055	0.240234	0.123047	0.0537109	0.831055	0.831055	0.27832	0.0185547	0.147461	0.700195	0.831055	0.413086	0.464844	0.174805	0.0419922	0.0322266	0.27832	0.96582	0.464844	0.320312	0.464844	0.700195	0.0136719	0.174805	0.577148	0.625	0.203125	0.240234	0.492188	0.826172	0.626953	0.359375	0.96875	1	0.40625	0.9375	0.6875
			HR vs. LL	1	0.101562	0.831055	0.700195	0.320312	0.764648	0.123047	0.519531	0.519531	0.464844	0.0830078	0.637695	0.898438	0.637695	0.831055	0.764648	0.637695	0.700195	0.464844	0.174805	0.898438	0.637695	0.27832	0.365234	0.365234	0.413086	0.845703	0.492188	0.820312	0.882812	0.320312	0.949219	0.910156	0.451172	0.652344	0.652344	1	0.523438	0.0546875	0.425781
		Firing rate at middle stage
				Time bin
				1	2	3	4	5	6	7	8	9	10	11	12	13	14	15	16	17	18	19	20	21	22	23	24	25	26	27	28	29	30	31	32	33	34	35	36	37	38	39	40
		Mean	HR	6.91614	7.17645	6.58688	6.96646	6.56426	7.27183	7.18731	7.71905	7.90319	7.26614	7.59568	7.96935	7.42564	7.4146	6.87427	7.06453	7.58263	7.834	7.91313	8.03267	6.96348	6.65316	10.7246	16.8992	13.3405	12.823	9.35343	7.2203	5.56795	3.61186	3.87509	2.8567	2.25001	1.71549	2.00823	1.99011	2.29732	2.2437	2.83837	2.32313
			LR	6.98675	8.36906	7.95551	8.02413	8.89986	7.22986	7.41818	6.68903	7.43936	9.48493	9.46585	8.08573	8.46906	7.63574	7.34469	8.99519	8.19588	7.47253	8.49836	7.90422	7.85723	8.10336	11.1035	19.6439	16.0472	13.6206	9.14817	7.72801	5.44224	3.93583	3.44716	3.31532	2.70833	2.31443	2.09593	2.99253	2.63004	2.32171	2.42519	3.05467
			HL	7.43845	5.84979	7.08321	7.0743	9.04529	6.71179	6.81524	8.33707	9.60032	8.44599	9.84143	12.2386	10.0988	8.94821	9.27649	9.26811	9.22074	10.5166	9.00281	7.40199	9.19984	8.36481	11.524	18.8248	17.201	14.7412	9.49208	6.72123	5.95786	3.79542	3.25775	3.46321	3.17566	2.35742	1.89412	2.24792	2.22961	1.9309	2.14519	1.8391
			LL	7.50591	7.41189	7.2013	6.28469	6.45755	6.73127	8.06931	7.36392	8.11676	7.86716	7.37831	8.45479	8.78561	9.71852	9.4546	8.9006	9.42192	10.2443	9.5891	8.95588	7.89469	9.06933	11.4597	19.3299	17.0685	13.7401	8.40302	7.20839	5.79097	4.0768	3.56453	3.74976	3.63076	2.88919	2.55625	2.74134	2.40099	2.3116	2.55868	2.29027
		s.e.m.	HR	1.99197	1.9596	1.63517	2.08683	1.59314	2.00705	1.85216	2.0312	2.20947	2.05662	2.21033	2.33158	2.35899	2.16986	2.17585	2.24117	2.34526	2.38744	2.37347	2.57143	2.37214	2.43618	2.82912	5.73678	4.7877	4.52827	4.19374	3.86368	3.23806	1.90681	2.11295	1.58513	1.4415	1.07343	1.47608	1.34527	1.48446	1.68386	1.74409	1.35479
			LR	1.82918	2.12878	2.13352	2.04963	2.42704	1.98289	2.26562	2.11839	2.10211	2.69419	2.59649	2.29459	2.24753	2.1439	2.20233	2.65106	2.35526	2.10327	2.44041	2.48687	2.50916	2.54707	2.86534	6.18046	5.57266	4.95242	4.17041	3.80202	3.33356	2.1092	2.00694	1.87349	1.60107	1.6154	1.38987	1.86306	1.46947	1.27685	1.67991	2.08095
			HL	2.68981	2.01717	2.56978	2.63533	3.12695	2.45237	2.42555	2.85666	2.95736	3.05166	3.20949	3.23381	3.16488	3.34792	3.02217	3.21785	2.84947	3.5795	3.04067	2.54107	3.74647	3.25511	3.81165	6.25497	5.50869	5.08956	4.14636	3.66003	3.728	2.27679	1.88265	2.11258	1.84184	1.61389	1.25138	1.28038	1.42738	1.31186	1.55653	1.06715
			LL	2.60718	2.73444	2.44253	2.09608	2.4433	2.41924	2.88713	3.15651	2.97734	2.82315	2.5607	3.05448	3.15926	3.37508	3.32165	3.10296	3.07145	3.21873	3.17636	3.16849	2.90654	3.48118	3.75888	6.44171	6.20715	5.07195	4.0098	3.96333	3.75872	2.43014	2.07552	2.06709	1.98431	1.83057	1.7042	1.68072	1.3364	1.47289	1.52736	1.39287
		p value (vs. HR)	HR vs. LR	0.7544	0.223429	0.375445	0.204564	0.0149652	0.82126	0.661179	0.249103	0.48517	0.0185846	0.211326	0.807574	0.204564	0.832866	0.48517	0.0533958	0.407742	0.733187	0.505701	0.832866	0.339155	0.0768308	0.455273	0.101106	0.247145	0.0533958	0.930756	0.116888	0.930756	0.285865	0.493901	0.711217	0.123877	0.534857	0.814819	0.248185	0.246005	0.501447	0.0522015	0.947909
			HR vs. HL	0.123045	0.0575329	0.476136	0.0581863	0.986134	0.123045	0.0392359	0.614811	0.426376	0.407742	0.548097	0.0666081	0.291364	0.875701	0.569832	0.935311	0.708884	0.638906	0.909531	0.289095	0.445468	0.715104	0.350656	0.832866	0.426345	0.0945281	0.592153	0.144582	0.9679	0.616408	0.0385337	0.628174	0.162454	0.958754	1	0.879395	0.554034	0.74939	0.144582	0.331764
			HR vs. LL	0.476136	0.407742	0.322075	0.305198	0.192434	0.18313	0.249103	0.0334616	0.371961	0.37193	0.526681	0.426376	0.306465	0.986134	0.465099	0.78258	0.832866	0.167651	0.684874	0.858282	0.445498	0.322075	0.497915	0.684874	0.733187	0.354825	0.115305	0.778177	0.286137	0.472347	0.57313	0.112779	0.092768	0.331696	0.103394	0.0437329	0.756369	0.958754	0.420426	0.736831
		Firing rate at late stage
				Time bin
				1	2	3	4	5	6	7	8	9	10	11	12	13	14	15	16	17	18	19	20	21	22	23	24	25	26	27	28	29	30	31	32	33	34	35	36	37	38	39	40
		Mean	HR	4.62012	4.90584	4.1493	4.86109	4.80421	4.78249	5.11461	5.00579	5.26353	5.69804	6.23237	6.04926	5.9888	6.30999	6.16434	7.01265	7.44497	7.77461	7.75033	8.47884	8.20951	7.69948	10.1357	13.6464	12.7473	12.1849	8.96621	6.79447	5.58066	4.28005	4.40898	3.7031	3.50612	3.35756	3.96046	4.71049	5.38069	5.86106	6.6097	7.88664
			LR	5.33615	5.10704	5.07046	4.77708	4.56894	6.47762	5.33599	5.00245	5.66842	5.55264	5.88644	6.72072	5.85356	6.27467	7.46977	7.28441	7.80298	7.85368	7.70475	7.51211	8.08843	8.36931	11.6888	13.3987	12.8215	11.2551	8.04682	7.38523	5.45848	4.27473	4.95978	3.49217	3.71665	3.44931	3.98017	3.32694	3.27602	3.6666	3.8557	4.10896
			HL	5.54169	5.40639	6.23036	6.35086	8.35425	7.93797	6.75475	7.48323	7.69859	7.67232	9.17529	8.26114	8.52027	8.12993	8.54828	8.82325	9.2474	10.1478	10.0116	10.033	12.0086	12.7332	14.3004	17.4834	15.3115	11.7914	6.99591	6.82521	5.96139	5.08244	4.18365	3.76456	3.2334	4.11816	3.56144	3.15697	3.23962	2.64435	2.71365	2.34715
			LL	5.69345	6.1501	6.44351	7.05695	7.42694	7.76927	7.3263	8.0313	8.31089	9.20157	9.81559	9.45506	9.55754	9.24644	9.80406	10.1182	10.2527	11.4467	11.5326	11.3418	11.8677	12.6603	13.5946	17.0583	16.0018	12.5233	8.61225	7.17059	5.51764	3.98543	3.98364	4.08155	4.13232	3.95434	4.38583	4.87613	5.79485	5.89296	6.21767	6.44099
		s.e.m.	HR	1.08744	1.19188	1.0619	1.03524	1.04006	0.990855	1.07555	0.999079	1.06408	1.24251	1.22512	1.13483	1.09454	1.17132	1.24953	1.41672	1.5328	1.63997	1.7105	1.9092	1.77429	1.81306	2.37093	4.08179	3.90548	3.6432	3.03623	2.53133	2.00669	1.35224	1.14558	0.892728	0.761974	0.809989	1.06709	1.32672	1.41824	1.64481	1.78387	2.09667
			LR	1.22491	1.13762	1.03848	1.12986	0.970155	1.53826	1.51776	1.16396	1.16329	1.3552	1.36673	1.57582	1.27825	1.44184	1.69477	1.64434	1.97288	1.95877	1.91283	1.77992	1.97805	2.12577	2.81255	3.98263	3.76857	3.32599	2.70885	2.60876	1.93292	1.05054	1.47212	0.966778	1.01707	0.950543	1.05776	1.07961	1.01968	1.13743	1.2055	1.17346
			HL	1.39541	1.30864	1.59741	1.61888	1.97159	2.00476	1.69395	1.83223	1.90765	1.96553	2.30622	1.98028	2.02818	2.27504	2.2185	2.31378	2.24525	2.62103	2.62808	2.44897	2.89148	3.26712	3.37044	4.64275	4.11034	3.31303	2.41271	2.27272	2.21111	1.43298	1.11941	0.986276	0.737294	1.02381	0.943595	0.716082	0.980623	0.594525	0.829748	0.655873
			LL	1.40128	1.58691	1.64499	1.8661	1.93222	2.06612	2.01694	2.13909	2.12313	2.47406	2.60723	2.55282	2.50495	2.4166	2.57395	2.62834	2.77216	3.05456	3.06183	2.89391	2.99807	3.42573	3.68951	4.66373	4.64741	3.67004	2.77201	2.56676	2.1404	1.35618	1.24655	1.21086	1.17108	1.23264	1.47725	1.72535	1.97469	2.17835	2.24978	2.32261
		p value (vs. HR)	HR vs. LR	0.701144	0.988865	0.0925454	0.387543	0.615137	0.394616	0.237207	0.119691	0.437179	0.371339	0.226372	0.832723	0.605621	0.616821	0.245968	1	0.741898	0.530015	0.93387	0.33313	0.785523	0.924896	0.158136	0.845098	0.472825	0.645417	0.572013	0.718588	0.50283	0.845076	0.665772	0.614286	0.968736	0.68187	0.501138	0.502821	0.10617	0.0345778	0.00656502	0.0407615
			HR vs. HL	0.788472	0.518771	0.95789	0.89797	0.463928	0.685695	0.889009	0.40813	0.330507	0.736812	0.891769	0.867544	0.733245	0.396156	0.490895	0.774957	0.808799	0.780155	0.463899	0.657348	0.144979	0.0110196	0.0401548	0.2333	0.597465	0.224564	0.0216723	0.512333	0.437002	0.410454	0.765519	0.648643	0.807922	0.974125	0.705129	0.051445	0.0064108	0.00336718	0.00269138	0.000257775
			HR vs. LL	0.944371	0.988866	0.224571	0.765321	0.581561	0.758833	0.978552	0.353951	0.261043	0.795483	0.676912	0.812475	0.655193	0.966606	0.767453	0.162034	0.840209	0.501542	0.967834	0.769475	0.737682	0.330507	0.805515	0.878969	0.616835	0.72294	0.202765	0.3177	0.0205267	0.0311093	0.0377736	0.42171	0.887549	0.791005	0.25654	0.24497	0.111469	0.0856978	0.137126	0.108459
		ROC value at early stage
				Time bin
				1	2	3	4	5	6	7	8	9	10	11	12	13	14	15	16	17	18	19	20
		Mean	HR vs. HL	0.511978	0.528822	0.521914	0.522766	0.514161	0.545253	0.488325	0.498602	0.439572	0.444218	0.484789	0.471591	0.433701	0.449572	0.494624	0.475384	0.501277	0.48827	0.502274	0.511896
			HR vs. LR	0.482808	0.486982	0.506626	0.509355	0.504154	0.532353	0.525206	0.518978	0.510001	0.492874	0.514008	0.49668	0.473933	0.495906	0.499359	0.49792	0.506801	0.51827	0.508405	0.508778
			HR vs. LL	0.504378	0.493133	0.5113	0.505171	0.507916	0.530183	0.457616	0.505025	0.483524	0.471944	0.510921	0.446393	0.471452	0.501307	0.495458	0.494512	0.503708	0.496323	0.512034	0.493796
		s.e.m.	HR vs. HL	0.0201948	0.0184283	0.014121	0.0215199	0.0293211	0.0181377	0.024325	0.0232578	0.0296349	0.0235816	0.0259939	0.0256535	0.0246086	0.0193752	0.0132597	0.0137039	0.020846	0.0174098	0.0213592	0.0153693
			HR vs. LR	0.00986689	0.00861602	0.0175486	0.0174379	0.0152673	0.0180651	0.0233943	0.0201307	0.0165933	0.0151053	0.0134832	0.0138134	0.0185528	0.00924328	0.00521654	0.0143418	0.00949208	0.0112043	0.0191241	0.00889914
			HR vs. LL	0.0248068	0.0249431	0.0288815	0.0276197	0.0285361	0.0255219	0.0284416	0.0201763	0.0195284	0.0127971	0.0259614	0.0242779	0.0242341	0.0129751	0.0120001	0.00741756	0.0118486	0.0117663	0.0156886	0.0128361
		p value	HR vs. HL	0.261572	0.261572	0.261572	0.261572	0.261572	0.00766744	0.725709	0.725709	0.00766744	0.00766744	0.0581549	0.261572	0.00766744	0.0581549	0.261572	0.00766744	0.725625	0.12313	0.238504	1
			HR vs. LR	0.0581549	0.725709	0.0581549	1	0.261572	0.00766744	0.0581549	0.725709	0.0581549	0.725709	0.261572	0.451477	0.725709	0.261572	0.451477	0.451477	0.451477	0.12313	0.238504	0.423802
			HR vs. LL	0.725709	0.725709	0.261572	0.725709	0.725709	0.725709	0.0580739	0.725709	0.0581549	0.0581549	0.725709	0.00766744	0.261572	0.725709	1	0.725709	0.725709	0.725709	0.451477	0.712609
		ROC value at middle stage
				Time bin
				1	2	3	4	5	6	7	8	9	10	11	12	13	14	15	16	17	18	19	20
		Mean	HR vs. HL	0.520735	0.525809	0.507364	0.514107	0.50606	0.477868	0.488378	0.485896	0.489399	0.509075	0.489846	0.499489	0.472995	0.498322	0.505703	0.502994	0.482433	0.493328	0.499642	0.514945
			HR vs. LR	0.490324	0.489587	0.482101	0.502632	0.493551	0.485639	0.489968	0.480352	0.492204	0.486557	0.486252	0.478322	0.480423	0.49278	0.504364	0.50135	0.489664	0.484475	0.490988	0.501348
			HR vs. LL	0.507214	0.508529	0.517828	0.520066	0.514602	0.511694	0.495924	0.488232	0.480525	0.496963	0.490519	0.50551	0.500694	0.514924	0.502569	0.493495	0.471537	0.482744	0.493307	0.503043
		s.e.m.	HR vs. HL	0.0202882	0.0234128	0.0219486	0.0193576	0.0203981	0.0219514	0.0193511	0.0213919	0.0217626	0.015577	0.0209197	0.0209951	0.0253175	0.0136701	0.0115485	0.00960633	0.0105648	0.0118666	0.00954445	0.0127252
			HR vs. LR	0.00964837	0.0137596	0.0116507	0.0102441	0.0103706	0.0144259	0.00903896	0.0120752	0.0124047	0.0117553	0.0119031	0.01158	0.0125127	0.00710075	0.00668919	0.0070478	0.00871855	0.00776336	0.010367	0.00988224
			HR vs. LL	0.0216606	0.0220131	0.0206377	0.0224526	0.0194979	0.0187393	0.0220023	0.0165361	0.0168336	0.0165864	0.0141601	0.0221327	0.0252013	0.0106537	0.0125702	0.00888793	0.012474	0.0072845	0.0121355	0.00934051
		p value	HR vs. HL	0.0281335	0.00600475	0.100281	0.100294	0.0524673	1	1	0.27508	0.100294	0.100281	0.589564	0.100294	0.589579	0.100294	0.167084	0.0929821	0.398593	0.251762	0.785076	0.581417
			HR vs. LR	0.27508	1	0.790104	0.589579	0.27508	0.589579	0.589579	0.100294	0.100294	0.589579	0.0281335	1	0.589579	0.167101	1	0.790104	0.785076	0.264636	0.57112	0.275061
			HR vs. LL	0.167101	0.0524673	0.0281335	0.0281335	0.0281335	0.100294	0.100294	0.589579	0.589579	0.0281335	0.0524673	0.100294	0.589579	0.0281271	0.00600475	0.790104	0.0105193	0.0211593	0.785067	0.581417
		ROC value at late stage
				Time bin
				1	2	3	4	5	6	7	8	9	10	11	12	13	14	15	16	17	18	19	20
		Mean	HR vs. HL	0.501791	0.481482	0.474108	0.487001	0.481706	0.494469	0.499216	0.477996	0.486625	0.477674	0.437025	0.458889	0.495678	0.525649	0.489841	0.501211	0.489888	0.500969	0.536532	0.567218
			HR vs. LR	0.486447	0.487802	0.489347	0.499823	0.49323	0.510425	0.499242	0.491337	0.510082	0.501155	0.491179	0.486897	0.501446	0.501953	0.497535	0.493222	0.497626	0.513695	0.541388	0.538421
			HR vs. LL	0.495662	0.485394	0.479802	0.477008	0.471971	0.474726	0.473347	0.471593	0.477784	0.472657	0.470938	0.473118	0.487849	0.499326	0.512187	0.508272	0.492988	0.502035	0.513557	0.525519
		s.e.m.	HR vs. HL	0.0173057	0.0155146	0.0174407	0.0140471	0.0169809	0.0172059	0.0176355	0.0165962	0.0179008	0.0187384	0.0205129	0.0180842	0.0159602	0.0172791	0.012628	0.0106972	0.0106357	0.0173065	0.0187923	0.0223596
			HR vs. LR	0.0116289	0.0107983	0.00874466	0.00957978	0.00875022	0.00826299	0.0109037	0.0103573	0.0112944	0.0109794	0.0119831	0.0126022	0.0131387	0.0113046	0.0129877	0.0147536	0.0169042	0.0174552	0.0199064	0.0212154
			HR vs. LL	0.0126921	0.0123902	0.0146013	0.0148465	0.016488	0.0171078	0.0171707	0.0168643	0.017073	0.0164348	0.0175588	0.0189789	0.0162	0.0148983	0.0134342	0.0130805	0.0130412	0.0113815	0.0148752	0.0166464
		p value	HR vs. HL	0.00319262	0.284967	0.0924573	0.0885886	0.0568277	0.000749765	0.00284187	0.277981	0.00074998	0.527949	0.28497	0.673387	0.0331589	1.53125e-05	0.382301	0.189014	0.825913	0.658792	0.00248475	1.5305e-05
			HR vs. LR	0.311894	0.411097	0.686441	0.00208639	0.311891	0.00429374	0.0415113	0.841095	0.00836068	1	0.540866	0.0415126	0.540842	0.535804	0.0366264	0.674413	0.39007	0.196405	0.0366264	0.00183203
			HR vs. LL	0.0681232	0.841096	0.842825	0.686439	0.545339	0.416586	0.0415138	0.842825	0.545342	0.311903	0.841095	0.842824	0.306537	0.0618094	0.000340882	0.530061	0.678946	0.678954	0.0651064	0.151707

## Sheet: Fig. 7E
Fig. 7E	Data	Averaged firing rate of CR-HR neurons at HR and LL trial
	Group	Number of CR-HR neurons in the pVLS; 11, 22, and 41 neurons for early, middle, and late stages, respectively.
	Softwear	matlab ver 2019
	Stats	Wilcoxon signed-rank test; early; signedrank = 20, p = 0.278320312500000 middle; Z = 0.308423677253194, p = 0.757759967693944 late; Z = 1.082022960515546, p = 0.279242325676194
	Early stage						Middle stage						Late stage
			Fring rate at each trial						Fring rate at each trial						Fring rate at each trial
			HR	LL					HR	LL					HR	LL
	# of neurons	1	0.604396	0.688259			# of neurons	1	1.98175	1.13553			# of neurons	1	0	0.03663
		2	5.68681	6.68016				2	1.24668	0.722135				2	9.10102	30.6766
		3	0.817308	0.989011				3	1.85676	0.43956				3	15.4221	15.0536
		4	0.549451	1.83761				4	0.21978	0.869565				4	5.38462	5.19231
		5	10.9091	6.64437				5	0.395604	0.356745				5	15.4907	13.4829
		6	2.51748	3.05085				6	12.0362	13.0634				6	8.56187	7.69231
		7	3.54839	5.41311				7	35.4855	41.5873				7	6.4214	6.2753
		8	22.9469	22.1154				8	16.343	16.9231				8	0.32967	0.25641
		9	4.65872	4.29487				9	1.2932	0.41958				9	12.2894	21.9017
		10	2.68689	3.39744				10	0.57971	1.15385				10	10.5128	7.47863
		11	2.14518	4.16667				11	1.3986	1.2426				11	2.36264	2.73504
								12	4.91508	1.89349				12	0.21978	0
								13	0.43956	0.236686				13	1.97802	0.42735
								14	13.966	21.7751				14	0.531136	0.0854701
								15	2.05794	2.95858				15	0.977376	0.346696
								16	0.679321	0.295858				16	0.561086	0.606717
								17	0.941447	1.21795				17	4.28959	2.66522
								18	57.0838	58.5577				18	2.93213	4.26869
								19	2.34214	1.05769				19	4.0181	3.27194
								20	5.37313	1.79487				20	0.39819	0.216685
								21	1.14811	0.512821				21	0.41629	0.216685
								22	11.0677	26.3782				22	0.307692	0.758397
														23	0.126697	0.0650054
														24	4.02766	2.95858
														25	3.09421	2.78107
														26	8.28003	2.84024
														27	0.723982	0.20362
														28	0.520362	0.20362
														29	1.71683	1.75515
														30	0.57971	0.130011
														31	62.8308	64.4491
														32	0.676923	1.14345
														33	1.90769	1.26819
														34	34.0718	47.5052
														35	12.4103	27.6299
														36	2.79202	2.4975
														37	49.4967	44.975
														38	16.0684	32.048
														39	6.11586	5.11489
														40	8.66097	17.6424
														41	4.65337	3.35664

## Sheet: Fig. 7F
Fig. 7F	Data	Cumulative probability of the proportion of CR-HR neurons in the pVLS at the early, middle, and late stages
	Group	Number of CR-HR neurons in the pVLS; 11, 22, and 41 neurons for early, middle, and late stages, respectively.
	Softwear	matlab ver 2019
	Dependent variable	Calculated number of event-related neurons
	Stats	Kruskalwallis test; χ2 = 13.7861, p = 0.001014826010656 post hoc Tukey–Kramer test; early vs. middle; p = 0.002636259039699 early vs. late; p = 0.005392508694053 middle vs. late; p = 0.976100803467453
			Cumulative probability of the proportion
	Learning stage	early	10.9589
		early	8.21918
		early	6.84932
		early	9.58904
		early	6.84932
		early	9.58904
		early	10.9589
		early	8.21918
		early	8.21918
		early	6.84932
		early	8.21918
		early	8.21918
		early	8.21918
		early	9.58904
		early	9.58904
		early	8.21918
		early	9.58904
		early	6.84932
		early	10.9589
		early	8.21918
		middle	9.09091
		middle	7.27273
		middle	10.9091
		middle	9.09091
		middle	10
		middle	10
		middle	10.9091
		middle	10
		middle	9.09091
		middle	10.9091
		middle	10.9091
		middle	10.9091
		middle	10
		middle	10.9091
		middle	10
		middle	10
		middle	12.7273
		middle	11.8182
		middle	10.9091
		middle	10
		late	10
		late	7.89474
		late	8.94737
		late	10.5263
		late	8.94737
		late	10
		late	9.47368
		late	10.5263
		late	9.47368
		late	10
		late	10.5263
		late	11.5789
		late	8.94737
		late	12.1053
		late	12.1053
		late	11.5789
		late	10
		late	10.5263
		late	11.0526
		late	10.5263
